# Supplementary material for: Single-cell characterization of human GBM reveals regional differences in tumor-infiltrating leukocyte activation
Source: eLife. 2023 Dec 21;12:RP92678. doi: 10.7554/eLife.92678 (PMC10735226; doi:10.7554/eLife.92678)
Supplement: Figure 1—source data 1. — DAPI + cell count per field of view (FOV) between tumor Center and Periphery. [file elife-92678-fig1-data1.xlsx]

## Sheet: Tabelle1
Figure 1 - Source Data 1
Figure 1C: DAPI+ cell count per field of view (FOV) between tumor Center and Periphery
Source Data
Center	Periphery
382	141
583	203
375	173
529	236
148	86
271	99
208	123
185	67
294	82
168	121
274	156
217	109
Summary Statistics
Median of column A	272.5, n=12
Median of column B	122.0, n=12
Difference: Actual	-150.5
Difference: Hodges-Lehmann	-138.5
Mann Whitney test
P value	0.0001
Exact or approximate P value?	Exact
P value summary	***
Significantly different (P < 0.05)?	Yes
One- or two-tailed P value?	Two-tailed
Sum of ranks in column A,B	211 , 89
Mann-Whitney U	11
