# Supplementary material for: Single-cell characterization of human GBM reveals regional differences in tumor-infiltrating leukocyte activation
Source: eLife. 2023 Dec 21;12:RP92678. doi: 10.7554/eLife.92678 (PMC10735226; doi:10.7554/eLife.92678)
Supplement: Figure 2—source data 1. — Differential abundance analysis between tumor center and periphery. [file elife-92678-fig2-data1.xlsx]

## Sheet: Tabelle1
Figure 2 - Source Data 1
Figure 2D: Differential abundance analysis between tumor center and periphery
Source Data
Number of cells per cell type
	Center					Periphery
	BTB 604	BTB 609	BTB 616	BTB 617	BTB 622	BTB 604	BTB 609	BTB 616	BTB 617	BTB 622
B cells	33		4	38	97	31	50	13	16	16
CD4 T-cells	64		54	180	146	89	478	158	358	85
CD8 T-cells	181		102	317	270	217	158	127	343	168
DCs	122		2	202	3	46	23	9	51	0
MdMs	129		2	826	23	25	5	8	15	2
MG_1	2		14	24	91	1	15	3	304	131
MG_2	81		41	120	527	25	32	4	202	242
Monocytes	17		82	230	52	25	80	553	379	12
NK cells	29		62	101	177	55	186	113	110	144
Frequency among leukocytes
	Center					Periphery
	BTB 604	BTB 609	BTB 616	BTB 617	BTB 622	BTB 604	BTB 609	BTB 616	BTB 617	BTB 622
B cells	5.0152		1.10193	1.86457	6.99856	6.03113	4.86855	1.31579	0.899888	2
CD4 T-cells	9.72644		14.876	8.83219	10.5339	17.3152	46.5433	15.9919	20.135	10.625
CD8 T-cells	27.5076		28.0992	15.5545	19.4805	42.2179	15.3846	12.8543	19.2913	21
DCs	18.541		0.550964	9.91168	0.21645	8.94942	2.23953	0.910931	2.86839	0
MdMs	19.6049		0.550964	40.5299	1.65945	4.86381	0.486855	0.809717	0.843645	0.25
MG_1	0.303951		3.85675	1.17763	6.56566	0.194553	1.46056	0.303644	17.0979	16.375
MG_2	12.31		11.2948	5.88813	38.0231	4.86381	3.11587	0.404858	11.3611	30.25
Monocytes	2.58359		22.5895	11.2856	3.7518	4.86381	7.78968	55.9717	21.3161	1.5
NK cells	4.40729		17.0799	4.95584	12.7706	10.7004	18.111	11.4372	6.18673	18
Differential abundance testing among leukocytes using limma voom
cluster_id	logFC	AveExpr	t	p_val	p_adj	B
CD4+ T cells	0.732861	17.1936	1.96416	0.0629748	0.188924	-4.47558
MdMs	-3.15956	14.306	-2.27847	0.0333402	0.188924	-3.54688
Monocytes	0.948402	16.3401	2.00262	0.0583865	0.188924	-4.26147
MG_2	-1.12267	16.2003	-1.5347	0.139886	0.314745	-4.7768
B cells	-0.934061	14.696	-1.10682	0.280971	0.505748	-4.90933
NK cells	0.363062	16.643	0.950871	0.352558	0.528837	-5.72729
MG_1	0.673118	14.2912	0.645507	0.525636	0.675817	-5.24582
DCs	-0.44786	14.0478	-0.432247	0.669997	0.753747	-5.25903
CD8+ T cells	0.0189647	17.6818	0.0626513	0.950641	0.950641	-6.39591
	Microglia	only
		cluster_id	logFC	AveExpr	t	p_val	p_adj	B
	1	MG_1	1.391121	17.5338	6.52984	1.33456e-05	2.66912e-05	14.2406
	2	MG_2	-0.691197	19.4429	-4.34423	0.000673451	6.73451e-04	2.24823
