# Supplementary material for: Single-cell characterization of human GBM reveals regional differences in tumor-infiltrating leukocyte activation
Source: eLife. 2023 Dec 21;12:RP92678. doi: 10.7554/eLife.92678 (PMC10735226; doi:10.7554/eLife.92678)
Supplement: Figure 5—source data 1. — CX3CR1+ CD8+ T cells between PBMC and tumor periphery. [file elife-92678-fig5-data1.xlsx]

## Sheet: Tabelle1
Figure 5 - Source Data 1
Figure 5C: CX3CR1+ CD8+ T cells between PBMC and tumor periphery
Source Data
PBMC	Periphery
46.3	43.1
22.8	15.8
39.7	7.88
82.3	5.21
35.2	4.79
26.6	23.6
Wilcoxon matched-pairs signed rank test
P value	0.0312
Exact or approximate P value?	Exact
P value summary	*
Significantly different (P < 0.05)?	Yes
One- or two-tailed P value?	Two-tailed
Sum of positive, negative ranks	0.000 , -21.00
Sum of signed ranks (W)	-21
Number of pairs	6
Number of ties (ignored)	0
