# Supplementary material for: Single-cell characterization of human GBM reveals regional differences in tumor-infiltrating leukocyte activation
Source: eLife. 2023 Dec 21;12:RP92678. doi: 10.7554/eLife.92678 (PMC10735226; doi:10.7554/eLife.92678)
Supplement: Figure 5—source data 2. — CX3CR1+ CD8+ T cells subpopulations in patient PBMC. [file elife-92678-fig5-data2.xlsx]

## Sheet: Tabelle1
Figure 5 - Source Data 2
Figure 5I: CX3CR1+ CD8+ T cells subpopulations in patient PBMC
Source Data
Naive	Teff	Tem	Tpm
20.8	68.2	37.9	63.6
9.39	59.7	51.6	32.2
7.69	68.4	47.3	29
21.5	93.1	43.4	36.5
13.3	75.6	26.7	31.6
14.6	34.2	37.2	47.4
3.36	65.4	23.2	22.9
12.9	64.1	31.1	32.6
5.58	80.2	48.4	52.2
10.8	87.9	45.5	19.1
11.8	88.5	46.7	50
Repeated measures one-way ANOVA with post-hoc Šidák’s correction for multiple comparisons
Comparison	Mean Diff.	95.00% CI of diff.	Below threshold?	Summary	Adjusted P Value
Naive vs. Teff	-59.42	-76.14 to -42.69	Yes	****	<0.0001
Naive vs. Tem	-27.93	-38.76 to -17.11	Yes	****	<0.0001
Naive vs. Tpm	-25.94	-38.04 to -13.85	Yes	***	0.0002
Teff vs. Tem	31.48	14.94 to 48.02	Yes	***	0.0006
Teff vs. Tpm	33.47	11.21 to 55.74	Yes	**	0.0037
Tem vs. Tpm	1.991	-12.70 to 16.68	No	ns	0.9987
