# Supplementary material for: Single-cell characterization of human GBM reveals regional differences in tumor-infiltrating leukocyte activation
Source: eLife. 2023 Dec 21;12:RP92678. doi: 10.7554/eLife.92678 (PMC10735226; doi:10.7554/eLife.92678)
Supplement: Figure 6—source data 1. — CD45RA or CD45RO expressing CD8+ T cells in tumor periphery. [file elife-92678-fig6-data1.xlsx]

## Sheet: Tabelle1
Figure 6 - Source Data 1
Figure 6B: CD45RA or CD45RO expressing CD8+ T cells in tumor periphery
Source Data
CD45RA+ CD45RO-	CD45RA- CD45RO+
10.1	86.1
15.8	76.3
2.84	93
14.1	72.9
9.04	76.6
24.1	67.8
Wilcoxon matched-pairs signed rank test
P value	0.0312
Exact or approximate P value?	Exact
P value summary	*
Significantly different (P < 0.05)?	Yes
One- or two-tailed P value?	Two-tailed
Sum of positive, negative ranks	21.00 , 0.000
Sum of signed ranks (W)	21
Number of pairs	6
Number of ties (ignored)	0
