# Supplementary material for: Single-cell characterization of human GBM reveals regional differences in tumor-infiltrating leukocyte activation
Source: eLife. 2023 Dec 21;12:RP92678. doi: 10.7554/eLife.92678 (PMC10735226; doi:10.7554/eLife.92678)
Supplement: Figure 6—source data 2. — CD69 CD103 co-expression analysis on CD8+T cells from PBMC and tumor periphery. [file elife-92678-fig6-data2.xlsx]

## Sheet: Tabelle1
Figure 6 - Source Data 2
Figure 6F: CD69 CD103 co-expression analysis on CD8+ T cells from PBMC and tumor periphery
Source Data
CD69-CD103-_PBMC	CD69+CD103-_PBMC	CD69-CD103+_PBMC	CD69+CD103+_PBMC	CD69-CD103-_Periphery	CD69+CD103-_Periphery	CD69-CD103+_Periphery	CD69+CD103+_Periphery
82	17.1	0.5	0.33	3.69	63.8	0	32.6
84.9	8.89	5.88	0.37	27.6	39.7	3.45	29.3
69.3	24.3	0.71	5.71	10.4	23.8	8	57.9
86.2	10.9	2.41	0.48	12.1	27.1	0	60.7
83.2	8.47	7.55	0.82	11.11	46.5	4.86	37.5
79.8	10.3	0.83	9.09	15.3	21.2	0.85	62.7
Repeated measures one-way ANOVA with post-hoc Šidák’s correction for multiple comparisons
Comparison	Mean Diff.	95.00% CI of diff.	Below threshold?	Summary	Adjusted P Value
CD69+CD103+_PBMC vs. CD69+CD103+_Periphery	-43.98	-60.67 to -27.30	Yes	***	0.0008
CD69+CD103-_PBMC vs. CD69+CD103-_Periphery	-23.69	-46.64 to -0.7382	Yes	*	0.0447
