# Supplementary material for: Single-cell characterization of human GBM reveals regional differences in tumor-infiltrating leukocyte activation
Source: eLife. 2023 Dec 21;12:RP92678. doi: 10.7554/eLife.92678 (PMC10735226; doi:10.7554/eLife.92678)
Supplement: Supplementary file 1. [file elife-92678-supp1.xlsx]

## Sheet: Tabelle1
Supplementary File 1: Patient characteristics
Patient	Sex	Age	Tumor Type	Histology	Grade	Status	IDH Status	MGMT promoter	EGFR amplification	Subclassification	Local Surgery	pre-OP steroids (cumulative dose)	Radiotherapy	Chemotherapy	Targeted Therapy	Immunotherapy	scRNAseq Center	scRNAseq Periphery	scRNAseq PBMC	Flow Cytometry Periphery	Flow Cytometry PBMC
BTB 604	M	62	Glioma	Glioblastoma	4	primary	wild type	unmethylated	not amplified	mesenchymal	Yes	4 mg Fortecortin	none	none	none	none	Yes	Yes	Yes	Yes	Yes
BTB 609	M	50	Glioma	Glioblastoma	4	primary	mutated	methylated	not amplified	high grade astrocytoma	Yes	96 mg Fortecortin	none	none	none	none	No	Yes	Yes	No	No
BTB 616	F	80	Glioma	Glioblastoma	4	primary	wild type	unmethylated	not amplified	proneural	Yes	80 mg Fortecortin	none	none	none	none	Yes	Yes	Yes	No	No
BTB 617	M	64	Glioma	Glioblastoma	4	primary	wild type	unmethylated	not amplified	proneural	Yes	none	none	none	none	none	Yes	Yes	Yes	No	No
BTB 622	F	51	Glioma	Glioblastoma	4	primary	mutated	unmethylated	not amplified	high grade astrocytoma	Yes	68 mg Fortecortin	none	none	none	none	Yes	Yes	Yes	No	No
BTB 642	F	56	Glioma	Glioblastoma	4	primary	wild type	unmethylated	not amplified	classical	Yes	88 mg Fortecortin	none	none	none	none	No	No	No	Yes	Yes
BTB 626	M	25	Glioma	Glioblastoma	4	primary	mutated	unmethylated	not amplified	high grade astrocytoma	Yes	56 mg Fortecortin	none	none	none	none	No	No	No	Yes	Yes
BTB 649	M	77	Glioma	Glioblastoma	4	primary	wild type	methylated	amplified	classical	Yes	8 mg Fortecortin	none	none	none	none	No	No	No	Yes	Yes
BTB 653	M	57	Glioma	Glioblastoma	4	primary	wild type	unmethylated	not amplified	proneural	Yes	80 mg Fortecortin	none	none	none	none	No	No	No	Yes	Yes
BTB 659	M	43	Glioma	Glioblastoma	3	primary	mutated	methylated	not amplified	anaplastic oligodendroglioma	Yes	64 mg Fortecortin	none	none	none	none	No	No	No	Yes	Yes
BTB 610	F	69	Glioma	Glioblastoma	4	primary	wild type	methylated	not amplified	mesenchymal	Yes	2 mg Fortecortin	none	none	none	none	No	No	No	No	Yes
BTB 644	M	64	Glioma	Glioblastoma	4	primary	wild type	unmethylated	amplified	classical	Yes	4 mg Fortecortin	none	none	none	none	No	No	No	No	Yes
BTB 643	M	66	Glioma	Glioblastoma	4	primary	wild type	unmethylated	not amplified	proneural	Yes	none	none	none	none	none	No	No	No	No	Yes
BTB 666	M	68	Glioma	Glioblastoma	4	primary	wild type	unmethylated	amplified	classical	Yes	96 mg Fortecortin	none	none	none	none	No	No	No	No	Yes
BTB 668	M	65	Glioma	Glioblastoma	4	primary	wild type	unmethylated	amplified	classical	Yes	76 mg Fortecortin	none	none	none	none	No	No	No	No	Yes
