# Supplementary material for: Single-cell characterization of human GBM reveals regional differences in tumor-infiltrating leukocyte activation
Source: eLife. 2023 Dec 21;12:RP92678. doi: 10.7554/eLife.92678 (PMC10735226; doi:10.7554/eLife.92678)
Supplement: Supplementary file 2. [file elife-92678-supp2.xlsx]

## Sheet: % MT reads
QC of scRNA-seq data_Summary statistics on the percent of read originating from the mitochondrial genes across cells_related to Fig. S1C
Cluster	Number of cells	Min.	1st Qu.	Median	Mean	3rd Qu.	Max.
B cells	1636	0.0257884	7.32582	9.17245	9.00554	10.933	14.9962
CD4+ T cells	12425	0.271902	6.69023	8.33787	8.54766	10.3111	14.9993
CD8+ T cells	5043	0.462923	7.17059	9.99365	9.46794	12.0397	14.9928
NK cells	4319	0.091124	7.83103	9.67736	9.43094	11.3908	14.9957
MdMs	1036	0.00639239	4.55027	6.95508	7.36013	10.2405	14.9574
Microglia	1860	0.0223257	4.56947	7.91344	7.95197	11.2142	14.9424
DCs	625	0.0110208	4.7046	7.15317	7.27731	9.56633	14.9908
Monocytes	13854	0.371351	7.80068	9.62919	9.65889	11.572	14.9957
CD45- cells	4668	0.0168166	3.23742	4.81329	5.62266	7.42224	14.9681

## Sheet: # detected genes
QC of scRNA-seq data_Summary statistics on the number of detected genes across cells_related to Fig. S1D
Cluster	Number of cells	Min.	1st Qu.	Median	Mean	3rd Qu.	Max.
B cells	1636	702	1029	1215	1382.42	1486	5341
CD4+ T cells	12425	700	1116	1268	1295.56	1438	4741
CD8+ T cells	5043	714	1172	1329	1363.89	1501	3663
NK cells	4319	733	1216	1364	1408.45	1539	4961
MdMs	1036	710	1666	2278.5	2400.9	3050.5	6537
Microglia	1860	701	930	1153	1288.1	1534	3964
DCs	625	892	2280	2807	2782.1	3234	5956
Monocytes	13854	740	1684	2110	2087.74	2485.75	5228
CD45- cells	4668	704	1745	2592	2866.35	3886.5	8504

## Sheet: Cell-cycle
QC of scRNA-seq data_Proportion of cells across the inferred phases of cell cycle_related to Fig. S1E
Cluster	Number of cells	G1	G2M	S
B cells	1636	70.599	6.17359	23.2274
CD4+ T cells	12425	74.3662	5.79477	19.839
CD8+ T cells	5043	78.4454	3.33135	18.2233
NK cells	4319	77.3096	2.84788	19.8426
MdMs	1036	91.7954	1.44788	6.75676
Microglia	1860	79.5699	10.0538	10.3763
DCs	625	94.72	0.8	4.48
Monocytes	13854	83.8386	2.4686	13.6928
CD45- cells	4668	63.132	8.71894	28.1491
