# Supplementary material for: Single-cell characterization of human GBM reveals regional differences in tumor-infiltrating leukocyte activation
Source: eLife. 2023 Dec 21;12:RP92678. doi: 10.7554/eLife.92678 (PMC10735226; doi:10.7554/eLife.92678)
Supplement: Supplementary file 3. [file elife-92678-supp3.xlsx]

## Sheet: # cells per cluster
Cell Type	Patient	Site	Cell number
B cells	604	center	33
B cells	604	PBMC	399
B cells	604	periphery	31
B cells	609	center	0
B cells	609	PBMC	462
B cells	609	periphery	50
B cells	616	center	4
B cells	616	PBMC	196
B cells	616	periphery	13
B cells	617	center	38
B cells	617	PBMC	150
B cells	617	periphery	16
B cells	622	center	97
B cells	622	PBMC	131
B cells	622	periphery	16
CD4+ T cells	604	center	64
CD4+ T cells	604	PBMC	1804
CD4+ T cells	604	periphery	89
CD4+ T cells	609	center	0
CD4+ T cells	609	PBMC	2664
CD4+ T cells	609	periphery	478
CD4+ T cells	616	center	54
CD4+ T cells	616	PBMC	2253
CD4+ T cells	616	periphery	158
CD4+ T cells	617	center	180
CD4+ T cells	617	PBMC	2165
CD4+ T cells	617	periphery	358
CD4+ T cells	622	center	146
CD4+ T cells	622	PBMC	1927
CD4+ T cells	622	periphery	85
CD8+ T cells	604	center	181
CD8+ T cells	604	PBMC	831
CD8+ T cells	604	periphery	217
CD8+ T cells	609	center	0
CD8+ T cells	609	PBMC	425
CD8+ T cells	609	periphery	158
CD8+ T cells	616	center	102
CD8+ T cells	616	PBMC	595
CD8+ T cells	616	periphery	127
CD8+ T cells	617	center	317
CD8+ T cells	617	PBMC	428
CD8+ T cells	617	periphery	343
CD8+ T cells	622	center	270
CD8+ T cells	622	PBMC	881
CD8+ T cells	622	periphery	168
DCs	604	center	122
DCs	604	PBMC	87
DCs	604	periphery	46
DCs	609	center	0
DCs	609	PBMC	28
DCs	609	periphery	23
DCs	616	center	2
DCs	616	PBMC	3
DCs	616	periphery	9
DCs	617	center	202
DCs	617	PBMC	47
DCs	617	periphery	51
DCs	622	center	3
DCs	622	PBMC	2
DCs	622	periphery	0
Endothelial cells	604	center	81
Endothelial cells	604	PBMC	0
Endothelial cells	604	periphery	90
Endothelial cells	609	center	0
Endothelial cells	609	PBMC	0
Endothelial cells	609	periphery	21
Endothelial cells	616	center	0
Endothelial cells	616	PBMC	0
Endothelial cells	616	periphery	1
Endothelial cells	617	center	8
Endothelial cells	617	PBMC	1
Endothelial cells	617	periphery	58
Endothelial cells	622	center	11
Endothelial cells	622	PBMC	0
Endothelial cells	622	periphery	0
MdMs	604	center	129
MdMs	604	PBMC	0
MdMs	604	periphery	25
MdMs	609	center	0
MdMs	609	PBMC	0
MdMs	609	periphery	5
MdMs	616	center	2
MdMs	616	PBMC	0
MdMs	616	periphery	8
MdMs	617	center	826
MdMs	617	PBMC	1
MdMs	617	periphery	15
MdMs	622	center	23
MdMs	622	PBMC	0
MdMs	622	periphery	2
MG_1	604	center	2
MG_1	604	PBMC	0
MG_1	604	periphery	1
MG_1	609	center	0
MG_1	609	PBMC	0
MG_1	609	periphery	15
MG_1	616	center	14
MG_1	616	PBMC	0
MG_1	616	periphery	3
MG_1	617	center	24
MG_1	617	PBMC	0
MG_1	617	periphery	304
MG_1	622	center	91
MG_1	622	PBMC	0
MG_1	622	periphery	131
MG_2	604	center	81
MG_2	604	PBMC	0
MG_2	604	periphery	25
MG_2	609	center	0
MG_2	609	PBMC	0
MG_2	609	periphery	32
MG_2	616	center	41
MG_2	616	PBMC	1
MG_2	616	periphery	4
MG_2	617	center	120
MG_2	617	PBMC	0
MG_2	617	periphery	202
MG_2	622	center	527
MG_2	622	PBMC	0
MG_2	622	periphery	242
Monocytes	604	center	17
Monocytes	604	PBMC	1655
Monocytes	604	periphery	25
Monocytes	609	center	0
Monocytes	609	PBMC	1690
Monocytes	609	periphery	80
Monocytes	616	center	82
Monocytes	616	PBMC	5200
Monocytes	616	periphery	553
Monocytes	617	center	230
Monocytes	617	PBMC	3340
Monocytes	617	periphery	379
Monocytes	622	center	52
Monocytes	622	PBMC	539
Monocytes	622	periphery	12
NK cells	604	center	29
NK cells	604	PBMC	795
NK cells	604	periphery	55
NK cells	609	center	0
NK cells	609	PBMC	649
NK cells	609	periphery	186
NK cells	616	center	62
NK cells	616	PBMC	872
NK cells	616	periphery	113
NK cells	617	center	101
NK cells	617	PBMC	411
NK cells	617	periphery	110
NK cells	622	center	177
NK cells	622	PBMC	615
NK cells	622	periphery	144
Oligodendrocytes	604	center	86
Oligodendrocytes	604	PBMC	0
Oligodendrocytes	604	periphery	90
Oligodendrocytes	609	center	0
Oligodendrocytes	609	PBMC	0
Oligodendrocytes	609	periphery	1
Oligodendrocytes	616	center	2
Oligodendrocytes	616	PBMC	0
Oligodendrocytes	616	periphery	1
Oligodendrocytes	617	center	3
Oligodendrocytes	617	PBMC	0
Oligodendrocytes	617	periphery	0
Oligodendrocytes	622	center	1
Oligodendrocytes	622	PBMC	0
Oligodendrocytes	622	periphery	1
Smooth muscle cells	604	center	190
Smooth muscle cells	604	PBMC	0
Smooth muscle cells	604	periphery	209
Smooth muscle cells	609	center	0
Smooth muscle cells	609	PBMC	0
Smooth muscle cells	609	periphery	21
Smooth muscle cells	616	center	1
Smooth muscle cells	616	PBMC	0
Smooth muscle cells	616	periphery	0
Smooth muscle cells	617	center	80
Smooth muscle cells	617	PBMC	0
Smooth muscle cells	617	periphery	29
Smooth muscle cells	622	center	6
Smooth muscle cells	622	PBMC	0
Smooth muscle cells	622	periphery	1
Tumor cells	604	center	2476
Tumor cells	604	PBMC	1
Tumor cells	604	periphery	141
Tumor cells	609	center	0
Tumor cells	609	PBMC	4
Tumor cells	609	periphery	173
Tumor cells	616	center	479
Tumor cells	616	PBMC	1
Tumor cells	616	periphery	1
Tumor cells	617	center	334
Tumor cells	617	PBMC	4
Tumor cells	617	periphery	8
Tumor cells	622	center	51
Tumor cells	622	PBMC	1
Tumor cells	622	periphery	1
Total cells:			45466
BTB 604			10107
BTB 609			7165
BTB 616			10957
BTB 617			10883
BTB 622			6354
