# Supplementary material for: Single-cell characterization of human GBM reveals regional differences in tumor-infiltrating leukocyte activation
Source: eLife. 2023 Dec 21;12:RP92678. doi: 10.7554/eLife.92678 (PMC10735226; doi:10.7554/eLife.92678)
Supplement: Supplementary file 4. [file elife-92678-supp4.xlsx]

## Sheet: B-cells
Significantly differentially expressed Genes in B-cell cluster Periphery vs Center
GeneId	Symbol	GeneName	log2FC	log2A	P.Value	adj.P.Val
no significant genes

## Sheet: CD4+ T-cells
Significantly differentially expressed Genes in CD4+ T-cell cluster Periphery vs Center
GeneId	Symbol	GeneName	log2FC	log2A	P.Value	adj.P.Val
ENSG00000204387	SNHG32	SNHG32	1.13906	7.28874	2.09818e-07	0.00120058
ENSG00000244398	AC116533.1	AC116533.1	-1.02477	6.25126	1.49986e-05	0.0429111

## Sheet: CD8+ T-cells
Significantly differentially expressed Genes in CD8+ T-cell cluster Periphery vs Center
GeneId	Symbol	GeneName	log2FC	log2A	P.Value	adj.P.Val
ENSG00000165949	IFI27	IFI27	-1.81527	8.34757	4.03942e-08	3.91353e-05
ENSG00000126709	IFI6	IFI6	-1.42159	8.4785	1.76779e-14	1.02761e-10
ENSG00000232573	RPL3P4	RPL3P4	-1.13938	6.97561	1.19629e-05	0.00347703
ENSG00000167664	TMIGD2	TMIGD2	-1.13217	6.03814	1.56147e-06	0.000698216
ENSG00000186891	TNFRSF18	TNFRSF18	-1.07515	8.14011	3.80587e-07	0.000276544
ENSG00000163599	CTLA4	CTLA4	-1.06573	7.20556	1.52004e-06	0.000698216
ENSG00000117632	STMN1	STMN1	-1.06471	8.83997	2.23608e-06	0.000866557
ENSG00000089127	AC004551.1	AC004551.1	-1.05098	5.37813	9.14058e-09	1.32835e-05
ENSG00000168675	LDLRAD4	LDLRAD4	-1.04762	7.11626	2.46752e-05	0.00602478
ENSG00000157601	MX1	MX1	-1.04642	7.67066	3.20356e-09	9.31114e-06
ENSG00000133106	EPSTI1	EPSTI1	-1.00243	7.54971	5.59972e-09	1.08504e-05
ENSG00000188313	PLSCR1	PLSCR1	-0.98776	6.66183	2.79028e-05	0.00648795
ENSG00000162772	ATF3	ATF3	-0.986342	8.25175	7.10628e-05	0.0109837
ENSG00000234797	RPS3AP6	RPS3AP6	-0.961712	5.6061	9.38417e-06	0.00303057
ENSG00000025708	TYMP	TYMP	-0.937215	7.77662	1.71435e-08	1.9931e-05
ENSG00000112667	DNPH1	DNPH1	-0.9291	6.70817	5.63932e-07	0.000364237
ENSG00000138496	PARP9	PARP9	-0.913577	6.23161	8.05403e-07	0.000468181
ENSG00000137804	NUSAP1	NUSAP1	-0.878654	6.04928	1.98149e-06	0.000822744
ENSG00000257529	RPL36A-HNRNPH2	RPL36A-HNRNPH2	-0.863924	5.6648	0.000779855	0.0444441
ENSG00000119969	HELLS	HELLS	-0.86297	5.83524	5.41121e-06	0.00196596
ENSG00000187608	ISG15	ISG15	-0.847381	9.12526	1.15159e-06	0.000608565
ENSG00000178773	CPNE7	CPNE7	-0.841367	5.9695	5.758e-06	0.0019689
ENSG00000117724	CENPF	CENPF	-0.828087	6.85574	1.41139e-05	0.00390686
ENSG00000186187	ZNRF1	ZNRF1	-0.822332	5.97547	1.11388e-05	0.00340788
ENSG00000137959	IFI44L	IFI44L	-0.818609	7.11467	3.61714e-05	0.00771066
ENSG00000137970	RPL7P9	RPL7P9	-0.807594	7.18572	0.000643538	0.0406618
ENSG00000115415	STAT1	STAT1	-0.799373	7.35924	5.10762e-05	0.00899715
ENSG00000130222	GADD45G	GADD45G	-0.78691	7.65125	4.90148e-05	0.00899715
ENSG00000115457	IGFBP2	IGFBP2	-0.779888	7.15694	0.000368375	0.0289373
ENSG00000113810	SMC4	SMC4	-0.765769	7.16353	7.55805e-05	0.0109837
ENSG00000186827	TNFRSF4	TNFRSF4	-0.75029	7.37231	0.000468603	0.0328192
ENSG00000042493	CAPG	CAPG	-0.749921	8.53709	8.90029e-05	0.0126189
ENSG00000143333	RGS16	RGS16	-0.734077	7.06677	2.48744e-05	0.00602478
ENSG00000137965	IFI44	IFI44	-0.729066	6.63665	0.000777319	0.0444441
ENSG00000181847	TIGIT	TIGIT	-0.718481	7.94392	3.48635e-05	0.00771066
ENSG00000135114	OASL	OASL	-0.709246	7.23113	6.35163e-05	0.0105491
ENSG00000196220	SRGAP3	SRGAP3	-0.709072	5.13323	0.000758366	0.0444441
ENSG00000157303	SUSD3	SUSD3	-0.707157	6.91361	0.000107147	0.0146208
ENSG00000138646	HERC5	HERC5	-0.699126	6.88639	0.000253119	0.022239
ENSG00000013275	PSMC4	PSMC4	-0.698318	6.86869	0.000154929	0.0183799
ENSG00000136111	TBC1D4	TBC1D4	-0.688946	6.3388	7.21961e-05	0.0109837
ENSG00000100365	NCF4	NCF4	-0.687178	6.36898	0.0001727	0.0185108
ENSG00000235552	RPL6P27	RPL6P27	-0.684464	5.78341	0.000290526	0.0237863
ENSG00000170606	HSPA4	HSPA4	-0.676105	7.04042	0.000178326	0.0185108
ENSG00000124225	PMEPA1	PMEPA1	-0.666568	6.2087	0.000397746	0.0296423
ENSG00000088832	FKBP1A	FKBP1A	-0.666282	7.00651	0.000130516	0.017243
ENSG00000156587	UBE2L6	UBE2L6	-0.655957	7.63791	0.000220784	0.0210396
ENSG00000169715	MT1E	MT1E	-0.649087	7.30597	0.000275049	0.0231719
ENSG00000171311	EXOSC1	EXOSC1	-0.647937	6.63123	0.000201019	0.020147
ENSG00000178562	CD28	CD28	-0.647931	6.14089	0.000306578	0.024752
ENSG00000183527	PSMG1	PSMG1	-0.643481	5.92527	0.000432269	0.031022
ENSG00000165272	AQP3	AQP3	-0.641558	7.13489	0.000234762	0.0216615
ENSG00000243927	MRPS6	MRPS6	-0.639864	7.08497	0.000213912	0.0207246
ENSG00000177409	SAMD9L	SAMD9L	-0.632379	7.21855	0.00017746	0.0185108
ENSG00000164611	PTTG1	PTTG1	-0.631553	7.82832	0.000489601	0.033483
ENSG00000173457	PPP1R14B	PPP1R14B	-0.621857	7.95163	0.000790744	0.0446272
ENSG00000257341	AL928654.3	AL928654.3	-0.619922	7.5056	0.000416177	0.0306233
ENSG00000198964	SGMS1	SGMS1	-0.616211	5.57381	0.000590284	0.0377068
ENSG00000136108	CKAP2	CKAP2	-0.596904	7.06691	0.000697701	0.0417594
ENSG00000204397	CARD16	CARD16	-0.590594	8.98993	0.000380222	0.029082
ENSG00000085117	CD82	CD82	-0.58874	6.59569	0.000704011	0.0417594
ENSG00000186298	PPP1CC	PPP1CC	-0.588464	7.38505	0.000867997	0.0476006
ENSG00000042753	AP2S1	AP2S1	-0.578271	7.88527	0.000508075	0.0339476
ENSG00000073584	SMARCE1	SMARCE1	-0.564403	7.18723	0.000847459	0.046917
ENSG00000213585	VDAC1	VDAC1	-0.562227	8.33176	0.000340221	0.0270919
ENSG00000109861	CTSC	CTSC	-0.542642	8.81889	0.000481281	0.0333058
ENSG00000139193	CD27	CD27	-0.530693	8.2103	0.000904283	0.048741
ENSG00000168066	SF1	SF1	0.529111	8.5388	0.000905561	0.048741
ENSG00000134294	SLC38A2	SLC38A2	0.564303	7.87136	0.000375085	0.0290716
ENSG00000119669	IRF2BPL	IRF2BPL	0.575739	6.45198	0.000941329	0.0497449
ENSG00000169252	ADRB2	ADRB2	0.577151	6.78144	0.000766405	0.0444441
ENSG00000185905	C16orf54	C16orf54	0.582224	7.25883	0.000500463	0.0338278
ENSG00000181722	ZBTB20	ZBTB20	0.584773	7.37564	0.00038839	0.0293209
ENSG00000020633	RUNX3	RUNX3	0.585332	8.9578	0.000552219	0.0360679
ENSG00000271383	NBPF19	NBPF19	0.590099	5.84305	0.000939105	0.0497449
ENSG00000105329	TGFB1	TGFB1	0.592394	8.44778	0.000256324	0.022239
ENSG00000159674	SPON2	SPON2	0.593184	6.87225	0.000672331	0.0415032
ENSG00000100731	PCNX1	PCNX1	0.605334	6.6575	0.00056373	0.0364107
ENSG00000204469	PRRC2A	PRRC2A	0.608448	5.95278	0.000804355	0.0449588
ENSG00000117868	ESYT2	ESYT2	0.630338	6.03815	0.000678274	0.0415032
ENSG00000112511	PHF1	PHF1	0.630695	7.21119	0.000536899	0.0354658
ENSG00000168906	MAT2A	MAT2A	0.637272	7.3047	0.000261032	0.0223144
ENSG00000111371	SLC38A1	SLC38A1	0.639368	8.37327	6.55465e-05	0.0105839
ENSG00000086619	ERO1B	ERO1B	0.63959	6.71798	0.000134029	0.0173136
ENSG00000105643	ARRDC2	ARRDC2	0.642808	6.34681	0.000653166	0.0408264
ENSG00000106948	AKNA	AKNA	0.644729	7.9503	0.000140348	0.0173583
ENSG00000068831	RASGRP2	RASGRP2	0.645041	6.61532	0.0001708	0.0185108
ENSG00000178951	ZBTB7A	ZBTB7A	0.657907	7.53233	0.000238863	0.0216955
ENSG00000265206	AC004687.1	AC004687.1	0.664365	7.2244	0.000184867	0.0188532
ENSG00000167470	MIDN	MIDN	0.675651	7.78207	4.08161e-05	0.00817277
ENSG00000182831	C16orf72	C16orf72	0.678044	6.18429	0.000700631	0.0417594
ENSG00000064201	TSPAN32	TSPAN32	0.683376	5.36996	0.00025574	0.022239
ENSG00000065989	PDE4A	PDE4A	0.68619	6.09211	0.00017363	0.0185108
ENSG00000282885	AL627171.2	AL627171.2	0.697928	5.4171	0.000137853	0.0173583
ENSG00000007264	MATK	MATK	0.6993	8.28274	4.21784e-05	0.00817277
ENSG00000181036	FCRL6	FCRL6	0.700284	6.56687	0.0002824	0.0234513
ENSG00000156738	MS4A1	MS4A1	0.702122	6.05364	0.000446901	0.0316809
ENSG00000145287	PLAC8	PLAC8	0.704914	7.49731	0.000108153	0.0146208
ENSG00000130827	PLXNA3	PLXNA3	0.713498	5.51182	0.000204558	0.0201542
ENSG00000169499	PLEKHA2	PLEKHA2	0.724478	6.73974	2.48105e-05	0.00602478
ENSG00000276168	RN7SL1	RN7SL1	0.724713	6.13799	7.48925e-05	0.0109837
ENSG00000150938	CRIM1	CRIM1	0.736138	5.45878	4.98998e-05	0.00899715
ENSG00000078687	TNRC6C	TNRC6C	0.741173	6.24232	3.71406e-05	0.00771066
ENSG00000281383	FP671120.5	FP671120.5	0.754977	8.91799	0.000158093	0.0183799
ENSG00000109929	SC5D	SC5D	0.756026	6.73904	0.000425882	0.0309456
ENSG00000160789	LMNA	LMNA	0.765065	7.16601	0.000226183	0.0212065
ENSG00000103056	SMPD3	SMPD3	0.78229	6.12845	0.000155892	0.0183799
ENSG00000137441	FGFBP2	FGFBP2	0.796575	7.61031	5.35214e-05	0.00915059
ENSG00000245105	A2M-AS1	A2M-AS1	0.814813	5.81692	0.000173731	0.0185108
ENSG00000228253	MT-ATP8	MT-ATP8	0.826831	8.21774	1.35683e-07	0.000112675

## Sheet: Endothelial cells
Significantly differentially expressed Genes in Endothelial cell cluster Periphery vs Center
GeneId	Symbol	GeneName	log2FC	log2A	P.Value	adj.P.Val
ENSG00000172602	RND1	RND1	1.60862	6.11494	8.70551e-08	0.000148464
ENSG00000197375	SLC22A5	SLC22A5	1.3318	6.01279	4.31199e-05	0.0408537
ENSG00000113361	CDH6	CDH6	-1.22739	5.02591	6.03239e-06	0.00734831
ENSG00000166741	NNMT	NNMT	-1.4806	7.48755	2.13477e-05	0.022754
ENSG00000186827	TNFRSF4	TNFRSF4	-1.5149	6.33632	3.82278e-06	0.00543281
ENSG00000026036	RTEL1-TNFRSF6B	RTEL1-TNFRSF6B	-2.01111	6.72634	5.83968e-08	0.000124487
ENSG00000107438	PDLIM1	PDLIM1	-2.04593	7.65408	4.33619e-08	0.000123249
ENSG00000170891	CYTL1	CYTL1	-2.23809	6.39389	3.27526e-08	0.000123249
ENSG00000119630	PGF	PGF	-2.24257	6.65212	5.61378e-10	4.78687e-06

## Sheet: MdM
Significantly differentially expressed Genes in MdM cluster Periphery vs Center
GeneId	Symbol	GeneName	log2FC	log2A	P.Value	adj.P.Val
ENSG00000120875	DUSP4	DUSP4	2.82033	6.70527	1.26175e-07	0.000556306
ENSG00000128383	APOBEC3A	APOBEC3A	2.66841	5.90212	1.58424e-06	0.00279396
ENSG00000126759	CFP	CFP	2.61997	4.59569	3.58877e-07	0.00105486
ENSG00000204020	LIPN	LIPN	2.19998	4.1958	5.52922e-05	0.0406306
ENSG00000260260	SNHG19	SNHG19	2.17416	5.50369	2.54233e-05	0.0224182
ENSG00000100311	PDGFB	PDGFB	2.11658	6.04227	3.1095e-05	0.0249269
ENSG00000234906	APOC2	APOC2	-2.5045	8.63839	3.2701e-06	0.00480595
ENSG00000129538	RNASE1	RNASE1	-2.58127	8.18714	4.10242e-06	0.00516788
ENSG00000135094	SDS	SDS	-2.82324	7.97243	9.73113e-07	0.00214523
ENSG00000220842	RPL21P16	RPL21P16	-3.38528	7.89337	4.46868e-08	0.000394048
ENSG00000173110	HSPA6	HSPA6	-3.45182	5.86656	2.48244e-05	0.0224182
ENSG00000198848	CES1	CES1	-3.65353	5.35743	1.92061e-05	0.02117

## Sheet: Microglia
Significantly differentially expressed Genes in total Microglia cluster Periphery vs Center
GeneId	Symbol	GeneName	log2FC	log2A	P.Value	adj.P.Val
ENSG00000115009	CCL20	CCL20	-2.35903	9.07404	4.9716e-08	4.37288e-05
ENSG00000275395	FCGBP	FCGBP	-1.91864	8.48223	1.75337e-08	2.69888e-05
ENSG00000149418	ST14	ST14	-1.69679	5.79503	3.16083e-07	0.000139009
ENSG00000126709	IFI6	IFI6	-1.6539	8.9207	6.84941e-05	0.00638967
ENSG00000100979	PLTP	PLTP	-1.56391	7.70206	1.3146e-05	0.0020235
ENSG00000165949	IFI27	IFI27	-1.55935	10.4047	0.000434126	0.0203474
ENSG00000105697	HAMP	HAMP	-1.42589	9.23726	6.14791e-05	0.00620536
ENSG00000177575	CD163	CD163	-1.3599	8.80184	0.000697961	0.0281502
ENSG00000136040	PLXNC1	PLXNC1	-1.34489	5.81689	3.66633e-06	0.000705424
ENSG00000117984	CTSD	CTSD	-1.34253	8.70991	0.000312617	0.0171856
ENSG00000187608	ISG15	ISG15	-1.29378	9.35176	0.00104399	0.0389567
ENSG00000117632	STMN1	STMN1	-1.21925	7.62385	0.00021243	0.0136818
ENSG00000154099	DNAAF1	DNAAF1	-1.1996	6.68522	0.000418682	0.0198294
ENSG00000185201	IFITM2	IFITM2	-1.18621	8.4984	0.0003312	0.017429
ENSG00000164611	PTTG1	PTTG1	-1.16761	6.18996	2.30501e-05	0.00301956
ENSG00000160932	LY6E	LY6E	-1.13317	7.3203	0.00111497	0.0403815
ENSG00000139410	SDSL	SDSL	-1.13291	5.61056	4.18668e-05	0.00460311
ENSG00000239672	NME1	NME1	-1.11358	6.59936	0.000386289	0.0188631
ENSG00000042753	AP2S1	AP2S1	-1.10774	8.58531	0.00150893	0.0477334
ENSG00000173457	PPP1R14B	PPP1R14B	-1.10462	7.62599	0.00148832	0.0477269
ENSG00000138646	HERC5	HERC5	-1.09987	6.80364	0.000279692	0.0160941
ENSG00000244115	DNAJC25-GNG10	DNAJC25-GNG10	-1.0899	7.1927	0.00150933	0.0477334
ENSG00000129235	TXNDC17	TXNDC17	-1.05283	7.64498	0.00123264	0.0423988
ENSG00000115415	STAT1	STAT1	-1.05248	6.44842	0.00131602	0.0440365
ENSG00000136689	IL1RN	IL1RN	-1.0441	8.02249	0.00145895	0.0470301
ENSG00000100504	PYGL	PYGL	-1.04017	6.28401	0.00031703	0.0172707
ENSG00000131370	SH3BP5	SH3BP5	-1.01769	6.07364	0.000325715	0.017429
ENSG00000176046	NUPR1	NUPR1	-0.989201	7.35775	0.000693487	0.0281502
ENSG00000124733	MEA1	MEA1	-0.986063	6.44377	0.00112344	0.0404168
ENSG00000131475	VPS25	VPS25	-0.978597	5.48067	0.000217014	0.0136818
ENSG00000134321	RSAD2	RSAD2	-0.972632	5.97266	0.0011411	0.0404168
ENSG00000002933	TMEM176A	TMEM176A	-0.966373	7.03696	0.00113608	0.0404168
ENSG00000121691	CAT	CAT	-0.956047	6.17972	0.000853504	0.0332597
ENSG00000159200	RCAN1	RCAN1	-0.946102	6.14653	0.00108058	0.0396021
ENSG00000133835	HSD17B4	HSD17B4	-0.945126	5.50126	0.000499794	0.0227943
ENSG00000113552	GNPDA1	GNPDA1	-0.921333	6.12735	0.00154324	0.0482322
ENSG00000161677	JOSD2	JOSD2	-0.895722	6.1898	0.00155981	0.0485038
ENSG00000078902	TOLLIP	TOLLIP	-0.873459	5.91616	0.00114876	0.0404168
ENSG00000254860	TMEM9B-AS1	TMEM9B-AS1	0.817346	4.90394	0.000878739	0.033815
ENSG00000230923	LINC00309	LINC00309	0.833938	5.1878	0.001295	0.0435996
ENSG00000181016	LSMEM1	LSMEM1	0.844723	5.17476	0.000699525	0.0281502
ENSG00000063176	SPHK2	SPHK2	0.847711	5.72617	0.00117572	0.0411302
ENSG00000274215	AC106028.4	AC106028.4	0.859635	5.61192	0.00133182	0.0443243
ENSG00000109771	LRP2BP	LRP2BP	0.860894	5.99193	0.00151953	0.0477334
ENSG00000233822	HIST1H2BN	HIST1H2BN	0.867826	5.68431	0.000899621	0.0344035
ENSG00000188610	FAM72B	FAM72B	0.89415	4.79017	0.000230715	0.0140645
ENSG00000243176	AC092944.1	AC092944.1	0.895092	6.20781	0.00125909	0.0428298
ENSG00000283050	GTF2IP12	GTF2IP12	0.90103	5.7436	0.000667308	0.0281412
ENSG00000273064	AC017083.1	AC017083.1	0.907817	6.13223	0.00160163	0.0495541
ENSG00000197580	BCO2	BCO2	0.912573	5.60831	0.000781735	0.0310525
ENSG00000145246	ATP10D	ATP10D	0.916252	6.34428	0.00124792	0.0426857
ENSG00000229337	AC079305.3	AC079305.3	0.921317	5.45753	0.000678118	0.0281502
ENSG00000139620	KANSL2	KANSL2	0.923473	5.54416	0.000619647	0.0263115
ENSG00000102984	ZNF821	ZNF821	0.933614	6.56466	0.00138328	0.0455193
ENSG00000246695	RASSF8-AS1	RASSF8-AS1	0.934633	6.00522	0.0012071	0.0419893
ENSG00000271869	AC026979.2	AC026979.2	0.936111	6.6102	0.00121626	0.0420702
ENSG00000261366	MANEA-DT	MANEA-DT	0.936469	6.10573	0.000691339	0.0281502
ENSG00000272686	AC006333.2	AC006333.2	0.949844	5.58556	0.00129588	0.0435996
ENSG00000162241	SLC25A45	SLC25A45	0.954392	5.97203	0.000555779	0.0244424
ENSG00000275291	RF00003	RF00003	0.956644	4.94611	7.87679e-05	0.00671824
ENSG00000231881	AL109615.2	AL109615.2	0.957471	5.60581	0.000803655	0.0317186
ENSG00000146090	RASGEF1C	RASGEF1C	0.963137	6.45924	0.00106284	0.039185
ENSG00000133874	RNF122	RNF122	0.964083	5.5846	0.000266925	0.015652
ENSG00000273382	AL356488.3	AL356488.3	0.965007	5.73346	0.000363711	0.0184915
ENSG00000260349	AC087190.1	AC087190.1	0.971807	6.00154	0.000395878	0.0190424
ENSG00000112406	HECA	HECA	0.982018	6.58713	0.0003731	0.0186763
ENSG00000280194	AD000864.1	AD000864.1	0.984267	5.62051	0.000192498	0.0128827
ENSG00000173530	TNFRSF10D	TNFRSF10D	1.00301	6.49324	0.00114406	0.0404168
ENSG00000167740	CYB5D2	CYB5D2	1.0036	5.91679	0.000304151	0.0168708
ENSG00000222043	AC079305.1	AC079305.1	1.00433	5.63205	0.000125586	0.00954903
ENSG00000261716	HIST2H2BC	HIST2H2BC	1.00579	5.88867	0.000381405	0.0187865
ENSG00000261335	AC005837.1	AC005837.1	1.00957	6.62774	0.000436228	0.0203474
ENSG00000179406	LINC00174	LINC00174	1.01241	6.09204	0.000179332	0.0124061
ENSG00000279838	AL356273.3	AL356273.3	1.01746	5.66219	0.000690896	0.0281502
ENSG00000269514	AC024257.3	AC024257.3	1.02086	5.71167	0.000285692	0.0161376
ENSG00000283078	AL137077.2	AL137077.2	1.02316	5.44614	0.000156575	0.0112097
ENSG00000287576	AC067930.8	AC067930.8	1.02324	6.57705	0.000545861	0.0243566
ENSG00000180596	HIST1H2BC	HIST1H2BC	1.03315	6.28328	0.000850426	0.0332597
ENSG00000285082	AL160272.2	AL160272.2	1.0336	5.36588	4.71985e-05	0.00509827
ENSG00000236882	LINC01554	LINC01554	1.03712	6.05166	0.000221642	0.0137844
ENSG00000276805	AL133216.2	AL133216.2	1.03863	6.15218	0.000147113	0.0106562
ENSG00000236069	AL136987.1	AL136987.1	1.04248	8.31361	0.00103791	0.0389567
ENSG00000181222	POLR2A	POLR2A	1.04311	7.82905	0.00109113	0.0397521
ENSG00000132196	HSD17B7	HSD17B7	1.04385	6.31339	0.000298433	0.0167041
ENSG00000166526	ZNF3	ZNF3	1.04452	6.58555	0.000552678	0.0244424
ENSG00000255198	SNHG9	SNHG9	1.04785	7.50307	0.00105641	0.0391827
ENSG00000226471	Z93930.2	Z93930.2	1.04788	5.85848	7.06108e-05	0.0064771
ENSG00000272145	NFYC-AS1	NFYC-AS1	1.04865	5.47468	0.00057934	0.0251197
ENSG00000141837	CACNA1A	CACNA1A	1.0496	7.11344	0.000986701	0.0372707
ENSG00000266714	MYO15B	MYO15B	1.0558	5.95199	0.000168279	0.0119091
ENSG00000239569	KMT2E-AS1	KMT2E-AS1	1.06013	6.31693	0.000342136	0.017852
ENSG00000285534	AL163541.1	AL163541.1	1.06038	6.0062	0.000941906	0.0357982
ENSG00000173898	SPTBN2	SPTBN2	1.06265	5.70365	6.66179e-05	0.00631025
ENSG00000152270	PDE3B	PDE3B	1.06737	7.21577	0.000389087	0.0188631
ENSG00000268584	AC073389.1	AC073389.1	1.06763	5.56404	0.000213417	0.0136818
ENSG00000253988	AC079015.1	AC079015.1	1.07137	7.8163	0.00151291	0.0477334
ENSG00000247746	USP51	USP51	1.07409	6.63114	0.00141659	0.0459048
ENSG00000006652	IFRD1	IFRD1	1.07417	8.70978	0.00133914	0.0443284
ENSG00000265100	AC005332.1	AC005332.1	1.07497	6.05614	0.000378255	0.0187816
ENSG00000260236	AC099778.1	AC099778.1	1.08072	5.9039	0.000282357	0.016097
ENSG00000173960	UBXN2A	UBXN2A	1.08217	6.72842	0.000186263	0.0126024
ENSG00000260278	AC098818.2	AC098818.2	1.08953	7.49242	0.000495523	0.0227943
ENSG00000286113	AC022868.2	AC022868.2	1.09534	6.54573	0.000130283	0.00978233
ENSG00000250565	ATP6V1E2	ATP6V1E2	1.09594	5.85216	7.25873e-05	0.0064771
ENSG00000183921	SDR42E2	SDR42E2	1.09978	6.17528	0.000198617	0.0131493
ENSG00000242028	HYPK	HYPK	1.11406	6.15668	6.46037e-05	0.00621508
ENSG00000171617	ENC1	ENC1	1.11719	5.55239	2.53965e-05	0.00319115
ENSG00000274290	HIST1H2BE	HIST1H2BE	1.12248	5.38036	1.55351e-05	0.00227737
ENSG00000276966	HIST1H4E	HIST1H4E	1.12252	6.17585	6.4259e-05	0.00621508
ENSG00000204241	AP000911.1	AP000911.1	1.12385	5.72048	3.56515e-05	0.00418753
ENSG00000273338	AC103591.3	AC103591.3	1.12457	7.44729	0.000412427	0.0196846
ENSG00000133316	WDR74	WDR74	1.13477	7.05694	0.000361573	0.0184915
ENSG00000287684	AL392172.2	AL392172.2	1.13513	5.50475	0.000366406	0.0184915
ENSG00000287425	AP003717.4	AP003717.4	1.13977	6.51397	0.000119833	0.00933937
ENSG00000286887	AL355881.1	AL355881.1	1.14156	7.57495	0.000574349	0.0250799
ENSG00000287697	Z99127.4	Z99127.4	1.14596	8.91931	0.0013973	0.0455193
ENSG00000144802	NFKBIZ	NFKBIZ	1.15316	9.3712	0.000872069	0.0337694
ENSG00000180573	HIST1H2AC	HIST1H2AC	1.15921	7.71355	0.000674882	0.0281502
ENSG00000122877	EGR2	EGR2	1.16389	8.0746	0.00139022	0.0455193
ENSG00000203804	ADAMTSL4-AS1	ADAMTSL4-AS1	1.16763	6.53767	0.000175106	0.0122514
ENSG00000196787	HIST1H2AG	HIST1H2AG	1.17429	6.27308	7.1762e-05	0.0064771
ENSG00000213062	Z99572.1	Z99572.1	1.18306	6.75668	0.000243713	0.0144283
ENSG00000287825	AL035587.2	AL035587.2	1.18745	5.92995	0.000114887	0.00906873
ENSG00000135297	MTO1	MTO1	1.18862	7.51372	0.000319776	0.0172707
ENSG00000134830	C5AR2	C5AR2	1.1929	6.328	0.000240171	0.0143866
ENSG00000185561	TLCD2	TLCD2	1.19327	6.39669	7.96543e-05	0.00671824
ENSG00000287263	AC008875.3	AC008875.3	1.19542	6.5019	0.000605363	0.0258835
ENSG00000221883	ARIH2OS	ARIH2OS	1.19897	6.60761	0.000102692	0.00821138
ENSG00000207205	RNVU1-15	RNVU1-15	1.20108	5.85237	6.46465e-06	0.00110563
ENSG00000158373	HIST1H2BD	HIST1H2BD	1.20286	6.01708	2.06145e-05	0.0027592
ENSG00000183111	ARHGEF37	ARHGEF37	1.20288	6.30334	6.05737e-05	0.00620536
ENSG00000179388	EGR3	EGR3	1.20341	8.90791	0.000329735	0.017429
ENSG00000277209	RPPH1	RPPH1	1.20494	7.03417	0.000505659	0.0228922
ENSG00000277767	AL442128.2	AL442128.2	1.20529	7.01641	0.000224591	0.0138281
ENSG00000265692	LINC01970	LINC01970	1.2157	7.00889	9.61644e-05	0.00779058
ENSG00000162231	NXF1	NXF1	1.21979	7.42773	0.000721532	0.0288472
ENSG00000229017	LINC01277	LINC01277	1.22136	5.50529	3.20625e-06	0.00065803
ENSG00000226889	AL359541.1	AL359541.1	1.22175	6.10851	2.77083e-05	0.00341199
ENSG00000276213	RF00017	RF00017	1.23141	7.01209	3.99252e-05	0.00455222
ENSG00000106829	TLE4	TLE4	1.23393	7.97335	0.000142555	0.0104489
ENSG00000270022	Z93241.1	Z93241.1	1.23853	8.44761	0.000240672	0.0143866
ENSG00000181631	P2RY13	P2RY13	1.24485	9.54262	0.000496933	0.0227943
ENSG00000280367	AP002364.1	AP002364.1	1.25233	5.77127	3.18802e-06	0.00065803
ENSG00000272501	AL662844.4	AL662844.4	1.26049	6.35895	4.11994e-05	0.00460311
ENSG00000174010	KLHL15	KLHL15	1.26198	6.65272	2.36469e-05	0.00303321
ENSG00000136869	TLR4	TLR4	1.2724	6.97092	7.45056e-05	0.0065533
ENSG00000240457	RN7SL472P	RN7SL472P	1.28293	6.45391	3.60466e-05	0.00418753
ENSG00000136527	TRA2B	TRA2B	1.28703	9.9045	0.000545917	0.0243566
ENSG00000141682	PMAIP1	PMAIP1	1.29287	9.21248	0.000355806	0.0184092
ENSG00000277075	HIST1H2AE	HIST1H2AE	1.29828	6.35254	2.04103e-05	0.0027592
ENSG00000245904	AC025164.1	AC025164.1	1.30613	7.9201	6.37091e-05	0.00621508
ENSG00000214756	CSKMT	CSKMT	1.30654	7.33622	8.34081e-05	0.00693978
ENSG00000263934	SNORD3A	SNORD3A	1.30996	8.08915	0.000214324	0.0136818
ENSG00000262202	AC007952.4	AC007952.4	1.31126	8.41343	0.000125625	0.00954903
ENSG00000278002	AL627171.1	AL627171.1	1.31703	8.15494	7.80746e-05	0.00671824
ENSG00000270069	MIR222HG	MIR222HG	1.32243	7.68556	5.37866e-05	0.00561295
ENSG00000277224	HIST1H2BF	HIST1H2BF	1.32268	6.6347	7.43969e-06	0.00123801
ENSG00000272211	AC114760.2	AC114760.2	1.34841	6.79281	3.01095e-05	0.00363499
ENSG00000255717	SNHG1	SNHG1	1.34852	7.53057	0.000599087	0.0257943
ENSG00000264017	RN7SL336P	RN7SL336P	1.34932	6.21686	0.000276267	0.0160469
ENSG00000285942	AC018362.3	AC018362.3	1.35578	6.21767	2.3222e-06	0.000529547
ENSG00000251131	AC025171.3	AC025171.3	1.36711	5.66137	2.57824e-07	0.00012211
ENSG00000136158	SPRY2	SPRY2	1.36962	7.48754	0.000132485	0.00982786
ENSG00000274210	RF00003	RF00003	1.3738	6.02271	7.61992e-07	0.000223409
ENSG00000203709	MIR29B2CHG	MIR29B2CHG	1.37483	8.02169	4.98163e-05	0.00528826
ENSG00000073737	DHRS9	DHRS9	1.38414	6.52301	1.11972e-06	0.000287256
ENSG00000222724	RNU2-63P	RNU2-63P	1.39792	8.54972	0.00021777	0.0136818
ENSG00000255882	AC091814.1	AC091814.1	1.40153	5.62209	1.51202e-07	8.4632e-05
ENSG00000273472	AC096733.2	AC096733.2	1.41071	6.65963	1.69998e-05	0.00243413
ENSG00000273783	AL136040.1	AL136040.1	1.42071	6.26893	1.86639e-05	0.00261168
ENSG00000259687	LINC01220	LINC01220	1.42481	6.20189	8.3707e-07	0.000229139
ENSG00000184678	HIST2H2BE	HIST2H2BE	1.43997	7.35213	1.22525e-05	0.00198523
ENSG00000164056	SPRY1	SPRY1	1.45545	8.20659	1.41832e-05	0.00212991
ENSG00000007944	MYLIP	MYLIP	1.45619	7.72421	8.4602e-05	0.00694526
ENSG00000186834	HEXIM1	HEXIM1	1.4619	8.46926	0.000182077	0.0124561
ENSG00000270175	AC023509.3	AC023509.3	1.46191	6.33895	3.39427e-07	0.000139324
ENSG00000157240	FZD1	FZD1	1.46374	5.84603	5.95799e-06	0.0010481
ENSG00000256525	POLG2	POLG2	1.4672	6.25217	4.95718e-07	0.000160639
ENSG00000262420	AC007613.1	AC007613.1	1.47705	6.65347	4.4653e-07	0.000152738
ENSG00000261684	AC018362.1	AC018362.1	1.47757	6.32929	4.3613e-07	0.000152738
ENSG00000260101	AC008074.2	AC008074.2	1.4856	6.16501	1.26602e-05	0.00199868
ENSG00000125968	ID1	ID1	1.49404	7.67141	5.54242e-06	0.00100367
ENSG00000236514	AL135791.1	AL135791.1	1.49739	6.81975	4.23573e-07	0.000152738
ENSG00000183508	TENT5C	TENT5C	1.53194	5.50029	8.49543e-08	5.81182e-05
ENSG00000220323	HIST2H2BD	HIST2H2BD	1.54097	6.71357	4.5638e-06	0.000851494
ENSG00000132744	ACY3	ACY3	1.61569	6.79724	3.31433e-06	0.000658269
ENSG00000257913	DDN-AS1	DDN-AS1	1.63627	6.29285	5.75513e-07	0.000177172
ENSG00000273727	RF00003	RF00003	1.63764	6.41722	6.11997e-08	4.71008e-05
ENSG00000259001	AL355075.4	AL355075.4	1.6456	8.2763	2.69697e-06	0.000593043
ENSG00000267275	AC020911.2	AC020911.2	1.67108	7.32487	2.29336e-07	0.000117669
ENSG00000184068	SREBF2-AS1	SREBF2-AS1	1.67487	7.44666	1.40056e-06	0.000344931
ENSG00000265206	AC004687.1	AC004687.1	1.68938	8.65251	8.55969e-07	0.000229139
ENSG00000230806	SRGAP2-AS1	SRGAP2-AS1	1.70525	6.25838	3.02463e-09	1.29671e-05
ENSG00000270361	AL451085.1	AL451085.1	1.71969	7.55996	1.01947e-07	6.27691e-05
ENSG00000272426	BX284668.6	BX284668.6	1.74049	7.31269	3.29951e-08	4.06301e-05
ENSG00000273802	HIST1H2BG	HIST1H2BG	1.75196	7.50657	1.50243e-06	0.000355787
ENSG00000224363	FP700111.1	FP700111.1	1.81355	7.27751	4.5438e-08	4.37288e-05
ENSG00000279317	AC006994.2	AC006994.2	1.85105	7.1996	6.31821e-09	1.29671e-05
ENSG00000282988	AL031777.3	AL031777.3	1.99923	7.45322	5.74475e-09	1.29671e-05

## Sheet: Monocytes
Significantly differentially expressed Genes in Monocyte cluster Periphery vs Center
GeneId	Symbol	GeneName	log2FC	log2A	P.Value	adj.P.Val
ENSG00000128512	DOCK4	DOCK4	-1.46619	4.95786	6.75688e-07	0.00486158
ENSG00000106991	ENG	ENG	-1.371	6.04466	5.14086e-06	0.0184942
ENSG00000136634	IL10	IL10	-1.27574	7.57495	1.07515e-05	0.0257856
ENSG00000150337	FCGR1A	FCGR1A	-1.21395	7.14498	1.97258e-05	0.0323875
ENSG00000232573	RPL3P4	RPL3P4	-1.20287	5.89579	2.25069e-05	0.0323875
ENSG00000183779	ZNF703	ZNF703	1.45916	6.5048	3.22948e-05	0.0376663
ENSG00000147119	CHST7	CHST7	1.38295	5.53716	3.66454e-05	0.0376663

## Sheet: DCs
Significantly differentially expressed Genes in DC cluster Periphery vs Center
GeneId	Symbol	GeneName	log2FC	log2A	P.Value	adj.P.Val
ENSG00000137265	IRF4	IRF4	1.90718	6.28083	6.31092e-07	0.000521454
ENSG00000270433	H3F3AP2	H3F3AP2	1.88671	4.69402	8.78911e-09	1.59768e-05
ENSG00000261040	WFDC21P	WFDC21P	1.87708	7.41929	1.26562e-08	1.91721e-05
ENSG00000168497	CAVIN2	CAVIN2	1.85977	6.4117	3.17134e-07	0.000288244
ENSG00000166592	RRAD	RRAD	1.75707	5.38909	9.20814e-08	9.2992e-05
ENSG00000115590	IL1R2	IL1R2	1.53387	7.80568	4.75595e-05	0.022751
ENSG00000129315	CCNT1	CCNT1	1.48649	5.06658	8.85894e-06	0.00536793
ENSG00000100453	GZMB	GZMB	1.3875	7.2888	0.000122297	0.0383297
ENSG00000132510	KDM6B	KDM6B	1.38121	8.53486	3.63369e-05	0.0183481
ENSG00000186480	INSIG1	INSIG1	1.37996	8.58006	3.22472e-05	0.0172409
ENSG00000131759	RARA	RARA	1.35646	6.61422	7.64618e-05	0.0303354
ENSG00000090339	ICAM1	ICAM1	1.35634	6.35244	5.74292e-05	0.0260987
ENSG00000153064	BANK1	BANK1	1.33083	5.14555	7.67647e-05	0.0303354
ENSG00000137801	THBS1	THBS1	1.31883	6.63568	0.000119871	0.0383297
ENSG00000173369	C1QB	C1QB	-1.3913	9.04053	6.30384e-05	0.0272836
ENSG00000123095	BHLHE41	BHLHE41	-1.47674	7.4773	0.000162808	0.0493253
ENSG00000166803	PCLAF	PCLAF	-1.49536	5.44703	0.00011804	0.0383297
ENSG00000176890	TYMS	TYMS	-1.54742	5.46581	0.000115318	0.0383297
ENSG00000234906	APOC2	APOC2	-1.61158	6.53814	2.21746e-05	0.0125966
ENSG00000106211	HSPB1	HSPB1	-1.62472	10.7615	9.08782e-05	0.0344163
ENSG00000128245	YWHAH	YWHAH	-1.64109	10.2889	9.57067e-05	0.0347951
ENSG00000105697	HAMP	HAMP	-1.91515	6.21509	2.3065e-06	0.00149742
ENSG00000220842	RPL21P16	RPL21P16	-1.99477	7.53332	3.8043e-08	4.93962e-05
ENSG00000184292	TACSTD2	TACSTD2	-2.02733	7.06516	8.50612e-07	0.000632332
ENSG00000159189	C1QC	C1QC	-2.14459	8.50913	9.04424e-07	0.000632332
ENSG00000100985	MMP9	MMP9	-2.29257	6.14311	6.61058e-08	7.51045e-05
ENSG00000104267	CA2	CA2	-2.45566	6.63157	2.14859e-09	4.88214e-06
ENSG00000163347	CLDN1	CLDN1	-2.52553	5.79027	5.96192e-10	1.80626e-06
ENSG00000100558	PLEK2	PLEK2	-2.57019	6.68624	5.82602e-10	1.80626e-06
ENSG00000275395	FCGBP	FCGBP	-4.32917	7.55837	1.13976e-19	1.03593e-15

## Sheet: NK cells
Significantly differentially expressed Genes in NK cell cluster Periphery vs Center
GeneId	Symbol	GeneName	log2FC	log2A	P.Value	adj.P.Val
ENSG00000107317	PTGDS	PTGDS	1.58272	10.2017	1.85222e-05	0.00273864
ENSG00000137441	FGFBP2	FGFBP2	1.49348	10.4092	9.80343e-09	1.10944e-05
ENSG00000203747	FCGR3A	FCGR3A	1.40394	10.0774	9.54916e-09	1.10944e-05
ENSG00000168329	CX3CR1	CX3CR1	1.25511	6.62893	4.95879e-07	0.000279946
ENSG00000183734	ASCL2	ASCL2	1.23491	6.48156	1.12191e-10	2.32234e-07
ENSG00000159674	SPON2	SPON2	1.19582	10.1184	2.44914e-06	0.00072243
ENSG00000075234	TTC38	TTC38	1.18429	7.76061	3.39308e-06	0.000810424
ENSG00000157216	SSBP3	SSBP3	1.12477	6.51907	1.07193e-08	1.10944e-05
ENSG00000196139	AKR1C3	AKR1C3	1.10184	7.25783	8.72548e-06	0.00146447
ENSG00000186088	GSAP	GSAP	1.07903	7.64117	4.3931e-08	3.41014e-05
ENSG00000089159	PXN	PXN	1.0685	6.74139	2.22268e-06	0.000708233
ENSG00000160255	ITGB2	ITGB2	1.05041	9.86502	9.3533e-08	6.45378e-05
ENSG00000180739	S1PR5	S1PR5	1.01963	7.16167	2.12334e-05	0.00293021
ENSG00000150045	KLRF1	KLRF1	1.01639	9.7563	3.47352e-05	0.00422952
ENSG00000205336	ADGRG1	ADGRG1	1.00166	7.26115	2.71312e-06	0.00072243
ENSG00000145287	PLAC8	PLAC8	0.976519	9.29708	3.99594e-06	0.000919067
ENSG00000141506	PIK3R5	PIK3R5	0.976067	5.85907	2.2609e-06	0.000708233
ENSG00000141232	TOB1	TOB1	0.953236	7.14828	5.33796e-06	0.00110496
ENSG00000130775	THEMIS2	THEMIS2	0.948584	6.51596	8.72183e-06	0.00146447
ENSG00000175066	GK5	GK5	0.931306	7.00947	3.78455e-05	0.00443435
ENSG00000196924	FLNA	FLNA	0.924089	8.48045	2.02752e-05	0.00286157
ENSG00000100427	MLC1	MLC1	0.918585	6.02333	3.09333e-06	0.000768382
ENSG00000143319	ISG20L2	ISG20L2	0.90183	7.1552	2.29087e-05	0.00296381
ENSG00000142634	EFHD2	EFHD2	0.895092	9.68939	0.000138521	0.0100025
ENSG00000100450	GZMH	GZMH	0.890097	10.2965	0.000150788	0.0107631
ENSG00000143443	C1orf56	C1orf56	0.878768	8.12195	6.27428e-05	0.00638743
ENSG00000160305	DIP2A	DIP2A	0.872564	8.3816	3.36286e-05	0.00417668
ENSG00000132359	RAP1GAP2	RAP1GAP2	0.868925	6.10121	2.27651e-05	0.00296381
ENSG00000185989	RASA3	RASA3	0.86381	6.76243	1.34073e-05	0.00208148
ENSG00000139187	KLRG1	KLRG1	0.849055	7.34909	0.00024034	0.0144904
ENSG00000148019	CEP78	CEP78	0.837539	7.57654	0.000373401	0.0194674
ENSG00000111913	RIPOR2	RIPOR2	0.835619	7.45871	0.000204829	0.0133893
ENSG00000069702	TGFBR3	TGFBR3	0.835297	6.54179	8.45729e-06	0.00146447
ENSG00000005844	ITGAL	ITGAL	0.835095	7.47495	0.000480092	0.0224163
ENSG00000131018	SYNE1	SYNE1	0.83322	8.13964	4.47045e-05	0.00495741
ENSG00000188042	ARL4C	ARL4C	0.828544	10.4726	0.000670473	0.027603
ENSG00000197057	DTHD1	DTHD1	0.826681	6.94674	0.00080072	0.0310779
ENSG00000196776	CD47	CD47	0.817366	8.79551	5.20139e-05	0.00538343
ENSG00000064393	HIPK2	HIPK2	0.817103	7.32399	3.57491e-05	0.00426926
ENSG00000131370	SH3BP5	SH3BP5	0.814505	7.73545	0.00156307	0.049524
ENSG00000000938	FGR	FGR	0.813863	7.35992	0.000118743	0.00983384
ENSG00000197540	GZMM	GZMM	0.813817	9.72986	0.000262558	0.0152382
ENSG00000142347	MYO1F	MYO1F	0.810526	7.528	4.79731e-05	0.0051976
ENSG00000100060	MFNG	MFNG	0.80333	7.08322	0.000131522	0.00983384
ENSG00000100351	GRAP2	GRAP2	0.795895	5.64989	9.77295e-06	0.00159711
ENSG00000175040	CHST2	CHST2	0.795211	7.12144	0.000137853	0.0100025
ENSG00000036448	MYOM2	MYOM2	0.783157	7.6813	0.000210751	0.013633
ENSG00000167613	LAIR1	LAIR1	0.782263	6.58826	4.46221e-05	0.00495741
ENSG00000186174	BCL9L	BCL9L	0.780756	6.66023	6.42593e-05	0.00643514
ENSG00000108669	CYTH1	CYTH1	0.780032	7.64477	6.77901e-05	0.00657776
ENSG00000169252	ADRB2	ADRB2	0.774766	7.2095	0.000217923	0.0139516
ENSG00000173200	PARP15	PARP15	0.769195	7.05925	0.000539165	0.0239158
ENSG00000105327	BBC3	BBC3	0.7616	5.9753	0.000236312	0.0143872
ENSG00000136286	MYO1G	MYO1G	0.754761	7.51265	0.00044003	0.0211763
ENSG00000184922	FMNL1	FMNL1	0.753575	7.93536	0.000392213	0.019802
ENSG00000124942	AHNAK	AHNAK	0.751798	6.84884	0.00114856	0.0402969
ENSG00000129968	ABHD17A	ABHD17A	0.751554	9.76353	0.000498179	0.0229162
ENSG00000142765	SYTL1	SYTL1	0.749548	7.88252	0.000407336	0.0203997
ENSG00000078304	PPP2R5C	PPP2R5C	0.749008	8.02255	0.000133018	0.00983384
ENSG00000101474	APMAP	APMAP	0.748995	8.88072	0.000513984	0.0229629
ENSG00000227191	TRGC2	TRGC2	0.738758	7.49417	0.000443305	0.0211763
ENSG00000021762	OSBPL5	OSBPL5	0.735943	6.41852	0.000253557	0.0148546
ENSG00000169896	ITGAM	ITGAM	0.735404	6.75937	0.000560622	0.0245174
ENSG00000034053	APBA2	APBA2	0.735359	6.45872	0.000361486	0.019352
ENSG00000109787	KLF3	KLF3	0.731209	7.75345	0.00049716	0.0229162
ENSG00000173068	BNC2	BNC2	0.727174	5.43149	2.98028e-05	0.00377705
ENSG00000160271	RALGDS	RALGDS	0.726341	6.14318	0.000369036	0.0194674
ENSG00000163577	EIF5A2	EIF5A2	0.725945	6.0361	0.000223964	0.0140486
ENSG00000140564	FURIN	FURIN	0.715694	6.35351	0.000251383	0.0148546
ENSG00000221957	KIR2DS4	KIR2DS4	0.713786	6.14469	0.00120531	0.0418156
ENSG00000145220	LYAR	LYAR	0.71371	8.26639	0.000188064	0.0124242
ENSG00000064012	CASP8	CASP8	0.706587	7.24777	0.000549684	0.0242095
ENSG00000140474	ULK3	ULK3	0.70203	6.02657	0.000229755	0.0142678
ENSG00000215559	ANKRD20A11P	ANKRD20A11P	0.699175	6.64367	0.00107032	0.0381995
ENSG00000049860	HEXB	HEXB	0.696997	5.48244	9.39495e-05	0.00856523
ENSG00000163219	ARHGAP25	ARHGAP25	0.695078	6.33848	0.00023403	0.0143872
ENSG00000168229	PTGDR	PTGDR	0.692286	7.74913	0.000507731	0.0229629
ENSG00000181104	F2R	F2R	0.691517	6.49413	0.000160502	0.0111991
ENSG00000142102	PGGHG	PGGHG	0.69071	6.60621	0.000572641	0.0248678
ENSG00000110318	CEP126	CEP126	0.690002	5.63758	0.000122996	0.00983384
ENSG00000104972	LILRB1	LILRB1	0.689597	5.56586	0.000186522	0.0124242
ENSG00000135269	TES	TES	0.686203	7.05939	0.000601006	0.0259184
ENSG00000113448	PDE4D	PDE4D	0.685181	7.62937	0.000868906	0.0329019
ENSG00000100219	XBP1	XBP1	0.679872	8.06496	0.000274602	0.0155025
ENSG00000154027	AK5	AK5	0.678532	5.88077	0.000221915	0.0140486
ENSG00000104964	TLE5	TLE5	0.677077	9.93275	0.000505199	0.0229629
ENSG00000182162	P2RY8	P2RY8	0.674621	6.38174	0.000380081	0.0195067
ENSG00000134215	VAV3	VAV3	0.671951	7.75867	0.000960516	0.0355048
ENSG00000132334	PTPRE	PTPRE	0.669177	8.00809	0.00152751	0.0488838
ENSG00000166501	PRKCB	PRKCB	0.667377	6.40628	0.000432274	0.0211372
ENSG00000178951	ZBTB7A	ZBTB7A	0.659721	7.71153	0.000634051	0.0269689
ENSG00000115977	AAK1	AAK1	0.656787	8.41157	0.000644188	0.0270298
ENSG00000023909	GCLM	GCLM	0.653481	6.86656	0.000632738	0.0269689
ENSG00000121766	ZCCHC17	ZCCHC17	0.652952	7.32935	0.00108246	0.0382784
ENSG00000172331	BPGM	BPGM	0.649853	6.52934	0.0013365	0.045107
ENSG00000137642	SORL1	SORL1	0.64918	7.11175	0.00152898	0.0488838
ENSG00000127947	PTPN12	PTPN12	0.645589	7.81281	0.00099641	0.0361854
ENSG00000238142	BX284668.5	BX284668.5	0.644957	6.44622	0.000655043	0.0273008
ENSG00000132466	ANKRD17	ANKRD17	0.643362	6.1854	0.00135896	0.0456171
ENSG00000124788	ATXN1	ATXN1	0.638602	6.04792	0.000671185	0.027603
ENSG00000179094	AC129492.1	AC129492.1	0.618127	6.52494	0.000889812	0.0331079
ENSG00000235162	C12orf75	C12orf75	0.60557	7.88604	0.001535	0.0488838
ENSG00000040933	INPP4A	INPP4A	0.595596	6.68562	0.00159358	0.0499805
ENSG00000165025	SYK	SYK	0.591377	5.95757	0.00137972	0.0460647
ENSG00000103496	STX4	STX4	0.585137	6.57729	0.00144887	0.047859
ENSG00000159314	ARHGAP27	ARHGAP27	0.575944	5.35773	0.000814548	0.0313492
ENSG00000133302	SLF1	SLF1	-0.608695	6.47556	0.000890341	0.0331079
ENSG00000103275	UBE2I	UBE2I	-0.623031	8.48629	0.00146707	0.0479499
ENSG00000198168	SVIP	SVIP	-0.630754	6.83182	0.000698755	0.0283612
ENSG00000100749	VRK1	VRK1	-0.639671	6.13154	0.00133379	0.045107
ENSG00000109320	NFKB1	NFKB1	-0.641191	7.29686	0.000779327	0.0304378
ENSG00000135114	OASL	OASL	-0.642131	6.76119	0.000879817	0.0331079
ENSG00000135919	SERPINE2	SERPINE2	-0.642138	5.72976	0.000966322	0.035508
ENSG00000124243	BCAS4	BCAS4	-0.649724	6.50636	0.00149205	0.0485111
ENSG00000084207	GSTP1	GSTP1	-0.650365	11.0954	0.00127578	0.0437712
ENSG00000124575	HIST1H1D	HIST1H1D	-0.656071	8.27071	0.00063988	0.0270298
ENSG00000008282	SYPL1	SYPL1	-0.658449	6.44283	0.000354909	0.0191651
ENSG00000041357	PSMA4	PSMA4	-0.662483	8.14866	0.000343376	0.0188705
ENSG00000105379	ETFB	ETFB	-0.663056	7.83645	0.00159075	0.0499805
ENSG00000102760	RGCC	RGCC	-0.663618	8.4469	0.00152169	0.0488838
ENSG00000172172	MRPL13	MRPL13	-0.664434	6.70798	0.0004651	0.021978
ENSG00000123136	DDX39A	DDX39A	-0.668146	7.5757	0.00127421	0.0437712
ENSG00000166037	CEP57	CEP57	-0.66834	7.31952	0.000746746	0.0295369
ENSG00000156802	ATAD2	ATAD2	-0.668637	6.6492	0.000333413	0.0184866
ENSG00000081870	HSPB11	HSPB11	-0.66948	7.83772	0.000688138	0.0281141
ENSG00000141556	TBCD	TBCD	-0.670349	6.46069	0.00026907	0.0153678
ENSG00000267855	NDUFA7	NDUFA7	-0.680038	7.50885	0.000424528	0.0209231
ENSG00000168214	RBPJ	RBPJ	-0.680956	7.26865	0.000855626	0.0325978
ENSG00000138796	HADH	HADH	-0.682148	6.22525	0.00072786	0.0289744
ENSG00000106268	NUDT1	NUDT1	-0.683722	7.35759	0.000992833	0.0361854
ENSG00000074800	ENO1	ENO1	-0.685249	9.33659	0.000376182	0.0194674
ENSG00000177879	AP3S1	AP3S1	-0.687144	7.06556	0.000774723	0.0304378
ENSG00000168393	DTYMK	DTYMK	-0.688395	6.71281	0.00146139	0.0479499
ENSG00000234797	RPS3AP6	RPS3AP6	-0.690998	5.57748	0.000244007	0.01457
ENSG00000159335	PTMS	PTMS	-0.693331	6.76374	0.00026974	0.0153678
ENSG00000136824	SMC2	SMC2	-0.704823	6.77024	0.000350234	0.0190785
ENSG00000104856	RELB	RELB	-0.713497	5.83609	0.000130437	0.00983384
ENSG00000079616	KIF22	KIF22	-0.714604	6.19149	0.000435867	0.0211464
ENSG00000131626	PPFIA1	PPFIA1	-0.720618	5.9745	0.000159306	0.0111991
ENSG00000132341	RAN	RAN	-0.72319	9.80005	0.00141082	0.0468514
ENSG00000187193	MT1X	MT1X	-0.725223	7.09178	0.00108486	0.0382784
ENSG00000224916	APOC4-APOC2	APOC4-APOC2	-0.738951	5.77783	0.00104934	0.0378861
ENSG00000106399	RPA3	RPA3	-0.740675	7.85941	0.000113775	0.00983384
ENSG00000198721	ECI2	ECI2	-0.740842	7.53891	0.000370323	0.0194674
ENSG00000165233	CARD19	CARD19	-0.741731	6.30475	7.82228e-05	0.00736006
ENSG00000153044	CENPH	CENPH	-0.743909	5.96439	0.000278116	0.0155594
ENSG00000128951	DUT	DUT	-0.744248	8.52261	0.00118663	0.0413987
ENSG00000168421	RHOH	RHOH	-0.750115	8.09703	0.000163944	0.0113121
ENSG00000167325	RRM1	RRM1	-0.75721	6.05629	9.44284e-05	0.00856523
ENSG00000099901	RANBP1	RANBP1	-0.768808	8.20322	0.000512785	0.0229629
ENSG00000119640	ACYP1	ACYP1	-0.770932	6.53052	5.12163e-05	0.00538343
ENSG00000239672	NME1	NME1	-0.780237	6.8619	9.51692e-05	0.00856523
ENSG00000144381	HSPD1	HSPD1	-0.789717	9.64083	0.000467166	0.021978
ENSG00000078596	ITM2A	ITM2A	-0.793078	8.43175	0.000388359	0.0197681
ENSG00000172578	KLHL6	KLHL6	-0.793313	6.08463	0.000721771	0.0289744
ENSG00000138757	G3BP2	G3BP2	-0.796814	8.16053	0.000122917	0.00983384
ENSG00000067225	PKM	PKM	-0.803813	8.21518	0.000723266	0.0289744
ENSG00000233493	TMEM238	TMEM238	-0.817476	7.18033	0.000129904	0.00983384
ENSG00000168298	HIST1H1E	HIST1H1E	-0.832123	7.11568	0.000126044	0.00983384
ENSG00000138646	HERC5	HERC5	-0.833204	6.48197	6.52841e-05	0.00643514
ENSG00000143641	GALNT2	GALNT2	-0.85219	6.31616	4.85444e-05	0.0051976
ENSG00000106462	EZH2	EZH2	-0.87245	6.38615	4.06684e-05	0.00467686
ENSG00000234906	APOC2	APOC2	-0.872796	5.98913	0.000424325	0.0209231
ENSG00000006625	GGCT	GGCT	-0.896841	6.89006	1.18079e-05	0.00188019
ENSG00000196220	SRGAP3	SRGAP3	-0.901587	6.26959	0.000123553	0.00983384
ENSG00000167664	TMIGD2	TMIGD2	-0.909772	9.04136	0.000131834	0.00983384
ENSG00000111843	TMEM14C	TMEM14C	-0.915117	6.96257	0.000817805	0.0313492
ENSG00000102172	SMS	SMS	-0.937253	7.49635	2.20829e-05	0.00296381
ENSG00000120802	TMPO	TMPO	-0.939587	7.74137	2.00218e-05	0.00286157
ENSG00000119969	HELLS	HELLS	-0.961898	6.21341	6.68312e-07	0.000308394
ENSG00000134545	KLRC1	KLRC1	-0.962851	9.41647	0.000113882	0.00983384
ENSG00000064601	CTSA	CTSA	-0.987416	7.27515	4.43849e-06	0.000984395
ENSG00000167553	TUBA1C	TUBA1C	-0.995352	6.89662	1.3807e-05	0.00209126
ENSG00000113810	SMC4	SMC4	-1.02205	7.48173	7.93681e-06	0.00146447
ENSG00000113088	GZMK	GZMK	-1.03187	8.82933	0.00128693	0.0439111
ENSG00000186891	TNFRSF18	TNFRSF18	-1.03862	9.3756	0.000131831	0.00983384
ENSG00000137959	IFI44L	IFI44L	-1.04462	6.99987	0.000187517	0.0124242
ENSG00000173457	PPP1R14B	PPP1R14B	-1.04868	7.93838	2.69712e-06	0.00072243
ENSG00000164687	FABP5	FABP5	-1.06644	7.92266	8.68795e-06	0.00146447
ENSG00000278677	HIST1H2AM	HIST1H2AM	-1.09118	6.17755	2.23e-07	0.000138483
ENSG00000217555	CKLF	CKLF	-1.09721	9.44787	5.00479e-06	0.00107171
ENSG00000164104	HMGB2	HMGB2	-1.12306	9.64256	1.89264e-06	0.000708233
ENSG00000173207	CKS1B	CKS1B	-1.14983	6.77886	2.11071e-06	0.000708233
ENSG00000102471	NDFIP2	NDFIP2	-1.16773	6.4428	1.26549e-08	1.12267e-05
ENSG00000117724	CENPF	CENPF	-1.17087	7.04373	5.44104e-07	0.000281574
ENSG00000010278	CD9	CD9	-1.1953	7.35488	0.000129639	0.00983384
ENSG00000112667	DNPH1	DNPH1	-1.22203	6.33331	6.95251e-07	0.000308394
ENSG00000143185	XCL2	XCL2	-1.2229	11.4299	0.000124436	0.00983384
ENSG00000157601	MX1	MX1	-1.24663	7.33529	2.28095e-06	0.000708233
ENSG00000126709	IFI6	IFI6	-1.28166	8.10508	0.000171544	0.0117064
ENSG00000176083	ZNF683	ZNF683	-1.32007	7.5402	1.61495e-06	0.00066859
ENSG00000235576	LINC01871	LINC01871	-1.35601	9.02908	7.56185e-06	0.00146447
ENSG00000170442	KRT86	KRT86	-1.39489	8.74254	0.00106737	0.0381995
ENSG00000227507	LTB	LTB	-1.46363	7.64825	3.47713e-12	1.07965e-08
ENSG00000164611	PTTG1	PTTG1	-1.46892	7.2739	2.792e-06	0.00072243
ENSG00000143184	XCL1	XCL1	-1.63085	10.7201	5.78993e-06	0.00115985
ENSG00000042493	CAPG	CAPG	-1.66041	8.36373	7.2052e-05	0.00688374
ENSG00000117632	STMN1	STMN1	-2.07312	9.24057	4.08664e-19	2.5378e-15

## Sheet: Smooth muscle cells
Significantly differentially expressed Genes in Smooth muscle cell cluster Periphery vs Center
GeneId	Symbol	GeneName	log2FC	log2A	P.Value	adj.P.Val
ENSG00000205364	MT1M	MT1M	4.27686	8.62921	6.99156e-06	0.00437497
ENSG00000205362	MT1A	MT1A	4.13658	7.28168	4.41515e-12	4.42045e-08
ENSG00000138135	CH25H	CH25H	4.00144	8.35229	3.39729e-05	0.0154608
ENSG00000136244	IL6	IL6	3.78146	6.80747	2.86218e-10	1.43281e-06
ENSG00000133392	MYH11	MYH11	3.59982	9.88296	0.000182599	0.0481101
ENSG00000120885	CLU	CLU	3.49389	6.82382	5.92013e-09	1.97574e-05
ENSG00000185022	MAFF	MAFF	3.04235	7.64548	2.93723e-07	0.000588152
ENSG00000235162	C12orf75	C12orf75	2.89089	5.87042	2.53067e-06	0.00230337
ENSG00000150938	CRIM1	CRIM1	2.51148	7.63423	9.83568e-05	0.0315757
ENSG00000187193	MT1X	MT1X	2.44367	8.88298	5.33091e-06	0.00355821
ENSG00000148660	CAMK2G	CAMK2G	2.38049	6.56698	2.41871e-05	0.0127453
ENSG00000123358	NR4A1	NR4A1	2.36507	9.64571	0.000180223	0.0481101
ENSG00000198963	RORB	RORB	2.2716	4.96971	3.58401e-06	0.00276539
ENSG00000119508	NR4A3	NR4A3	2.09643	5.56749	2.24601e-05	0.0124928
ENSG00000075426	FOSL2	FOSL2	2.09609	7.28708	3.15393e-05	0.0150367
ENSG00000153234	NR4A2	NR4A2	2.08515	6.74407	4.27028e-06	0.00305386
ENSG00000144476	ACKR3	ACKR3	2.03176	6.20768	2.20703e-05	0.0124928
ENSG00000198523	PLN	PLN	1.93956	8.17994	3.90374e-05	0.0161955
ENSG00000134107	BHLHE40	BHLHE40	1.89907	6.34453	0.000154036	0.044063
ENSG00000179388	EGR3	EGR3	1.87846	5.18214	6.66087e-07	0.000833608
ENSG00000105835	NAMPT	NAMPT	1.85769	7.01897	0.00014923	0.0439439
ENSG00000115137	DNAJC27	DNAJC27	1.84198	5.19827	5.35622e-07	0.000766093
ENSG00000131002	TXLNGY	TXLNGY	1.78463	4.19455	3.00451e-05	0.0150367
ENSG00000157557	ETS2	ETS2	1.63933	6.47596	9.69435e-05	0.0315757
ENSG00000148053	NTRK2	NTRK2	1.55073	4.23334	6.18923e-05	0.0221309
ENSG00000139112	GABARAPL1	GABARAPL1	1.54073	6.55233	0.00016421	0.0456687
ENSG00000260428	SCX	SCX	1.48809	4.03276	4.04401e-05	0.0161955
ENSG00000112137	PHACTR1	PHACTR1	1.351	4.0459	0.000100921	0.0315757
ENSG00000157456	CCNB2	CCNB2	-1.53839	5.03499	0.00011981	0.0363495
ENSG00000131747	TOP2A	TOP2A	-1.6066	4.57991	4.02818e-05	0.0161955
ENSG00000100526	CDKN3	CDKN3	-1.73621	5.46169	9.88852e-05	0.0315757
ENSG00000117399	CDC20	CDC20	-1.92247	5.10815	3.5907e-06	0.00276539
ENSG00000130303	BST2	BST2	-1.94052	6.53064	5.10437e-05	0.0189278
ENSG00000015475	BID	BID	-1.97419	6.63119	4.41173e-05	0.0169886
ENSG00000089685	BIRC5	BIRC5	-2.15798	5.7627	1.22455e-06	0.00122601
ENSG00000117724	CENPF	CENPF	-2.34347	6.19071	9.34679e-07	0.00103978
ENSG00000148773	MKI67	MKI67	-2.41153	5.44546	8.80027e-09	2.20271e-05
ENSG00000164611	PTTG1	PTTG1	-2.6931	6.85793	4.02004e-07	0.00067081

[truncated: 1 more sheets: Tumor cells]
