# Supplementary material for: Single-cell characterization of human GBM reveals regional differences in tumor-infiltrating leukocyte activation
Source: eLife. 2023 Dec 21;12:RP92678. doi: 10.7554/eLife.92678 (PMC10735226; doi:10.7554/eLife.92678)
Supplement: Supplementary file 5. [file elife-92678-supp5.xlsx]

## Sheet: MG_1
Differentially expressed Genes in MG_1 cluster vs. MG_2 cluster
Gene ID	Top	p.value	FDR	summary.logFC
JUN	1	1.73888e-290	2.69926e-286	3.6802
FOS	2	6.2641e-237	4.86188e-233	2.93142
FOSB	3	3.68966e-200	1.90915e-196	2.72823
DUSP1	4	5.35448e-196	2.07794e-192	2.50516
NEAT1	5	3.13358e-181	9.72852e-178	2.31042
HSP90AA1	6	1.04033e-172	2.69151e-169	2.74846
PPP1R15A	7	3.10034e-167	6.87522e-164	2.0927
BTG1	8	9.01049e-164	1.74837e-160	2.45304
RHOB	9	2.8335e-162	4.88715e-159	2.341
H3F3B	10	4.52359e-162	7.02197e-159	2.06077
IER2	11	2.89709e-151	4.08832e-148	2.533
YME1L1	12	1.26322e-149	1.63408e-146	2.31393
AC020916.1	13	3.55731e-149	4.2477e-146	2.12658
BTG2	14	3.2029e-142	3.55133e-139	2.21368
JUNB	15	2.05441e-140	2.12604e-137	1.99587
GADD45B	16	5.40354e-136	5.24245e-133	2.1976
KLF2	17	8.63309e-128	7.88303e-125	2.25649
IER5	18	9.26497e-128	7.99001e-125	2.45004
ATP2B1-AS1	19	6.9581e-125	5.68477e-122	2.09738
PPP1R10	20	3.95924e-124	3.07296e-121	1.82436
IER3	21	4.69646e-124	3.47158e-121	2.10421
AC253572.2	22	3.02627e-123	2.13531e-120	2.20767
MALAT1	23	6.42178e-122	4.33414e-119	2.40579
CCNL1	24	1.88121e-116	1.21675e-113	2.01865
UBC	25	4.63235e-116	2.87632e-113	1.60844
JUND	26	1.00195e-110	5.982e-108	1.56159
ID2	27	4.54371e-110	2.6123e-107	1.88354
EIF1	28	3.47746e-109	1.92788e-106	1.4242
AC091271.1	29	1.25605e-108	6.72332e-106	1.91251
HSPA1A	30	1.17849e-97	6.09792e-95	2.53351
EGR1	31	1.25056e-96	6.26208e-94	1.93868
PMAIP1	32	1.11127e-93	5.39072e-91	1.60313
HSPH1	33	1.2373e-93	5.82021e-91	1.83992
HSPA8	34	2.82872e-93	1.29148e-90	1.78048
Z99127.4	35	4.44094e-92	1.96962e-89	1.60024
HIST2H2AA4	36	6.75131e-91	2.83245e-88	1.49355
HIST2H2AA3	37	6.75131e-91	2.83245e-88	1.49355
MAFB	38	5.22845e-89	2.13582e-86	1.89244
NFKBIA	39	6.39128e-88	2.54389e-85	1.77752
RGS2	40	6.26677e-84	2.43198e-81	1.74368
SGK1	41	8.25685e-83	3.12613e-80	1.49904
KLF4	42	9.05607e-82	3.34708e-79	1.49414
SRSF7	43	1.27398e-81	4.59907e-79	1.63677
RGS1	44	1.3051e-80	4.60432e-78	1.63749
TUBB4B	45	4.92979e-79	1.70056e-76	1.3913
SNORD3B-2	46	8.44396e-78	2.84947e-75	1.45833
MCL1	47	1.50517e-77	4.97121e-75	1.33783
SAT1	48	1.33943e-76	4.33168e-74	1.44029
AC245014.3	49	1.83264e-72	5.80574e-70	1.50461
TRA2B	50	1.90514e-72	5.91471e-70	1.36725
DDX5	51	2.99957e-72	9.12986e-70	1.20971
NFKBIZ	52	7.14519e-72	2.13298e-69	1.31447
AC004687.1	53	7.3035e-72	2.1391e-69	1.22645
HSPD1	54	3.73921e-71	1.07488e-68	1.66217
DNAJB1	55	2.84544e-70	8.03086e-68	1.80632
Z93241.1	56	2.59754e-69	7.20028e-67	1.36627
SRSF3	57	1.35036e-68	3.67749e-66	1.23234
HSP90AB1	58	6.81038e-66	1.82272e-63	1.3922
MT-CO3	59	1.27992e-65	3.36748e-63	1.17077
MT-ND3	60	3.77374e-65	9.76329e-63	1.12195
SNHG8	61	3.60393e-60	9.17112e-58	1.23131
SERTAD1	62	5.02398e-59	1.25786e-56	1.23121
AC007952.4	63	2.03273e-57	5.00857e-55	1.14615
NR4A2	64	2.08858e-57	5.06578e-55	1.27449
VMP1	65	6.09597e-57	1.45581e-54	1.25312
OTUD1	66	8.81794e-57	2.07395e-54	1.59105
HSPB1	67	5.58817e-56	1.2947e-53	2.08623
IER5L	68	6.4565e-56	1.47389e-53	1.18915
MT-ATP6	69	7.88246e-56	1.77333e-53	0.996555
CXCL8	70	5.49485e-55	1.21852e-52	2.02995
RNU2-63P	71	6.56298e-55	1.43489e-52	1.1879
AL627171.1	72	2.24143e-53	4.83246e-51	1.01424
AC020911.2	73	2.68433e-53	5.70807e-51	0.833645
TOB1	74	2.74768e-53	5.76381e-51	0.920332
GLS	75	2.95261e-53	6.11111e-51	1.04297
BAG3	76	5.26201e-53	1.07476e-50	1.26258
SNORD3A	77	1.99316e-52	4.01815e-50	0.989066
PCF11	78	7.31378e-52	1.45554e-49	0.932656
MAT2A	79	2.12189e-51	4.16939e-49	1.03111
DNAJA1	80	2.67427e-51	5.18908e-49	1.1479
AL450998.2	81	1.52657e-50	2.92555e-48	0.949267
MIR29B2CHG	82	3.15195e-50	5.96679e-48	0.896249
TSC22D3	83	5.38956e-50	1.00798e-47	1.18312
ILF3-DT	84	6.6553e-50	1.22988e-47	0.901406
CLK1	85	1.43578e-49	2.62207e-47	0.95472
NUFIP2	86	1.05404e-46	1.90254e-44	1.01734
AL355075.4	87	4.76075e-46	8.49438e-44	1.0227
CYCS	88	6.48222e-46	1.14345e-43	1.11369
CSKMT	89	1.13881e-45	1.98627e-43	0.733502
MT-CYB	90	1.20583e-45	2.07978e-43	0.905921
AFF4	91	1.79384e-45	3.05997e-43	0.886755
ZFAND5	92	1.07439e-44	1.81281e-42	0.97651
AC006994.2	93	5.26841e-44	8.79372e-42	0.76881
NEU1	94	2.52021e-43	4.16184e-41	0.962883
UBB	95	4.40289e-43	7.19433e-41	1.26569
AL451085.1	96	1.05417e-42	1.70458e-40	0.825461
SLC1A3	97	1.94766e-42	3.11687e-40	1.01597
ARL4A	98	3.44235e-42	5.45261e-40	0.895896
COQ7	99	5.37159e-42	8.42254e-40	0.603171
DDX3Y	100	5.72526e-42	8.88732e-40	0.941782
HNRNPU	101	6.75091e-42	1.03757e-39	1.10351
HEXIM1	102	1.78659e-41	2.71894e-39	0.889603
GLUL	103	7.04075e-41	1.0611e-38	1.1273
TMEM107	104	1.67493e-39	2.49999e-37	0.896345
TNF	105	5.44016e-39	8.04263e-37	1.09597
OTUD6B-AS1	106	7.88771e-39	1.1551e-36	0.824766
CITED2	107	1.84432e-38	2.67564e-36	1.01661
HIST1H2BG	108	4.41445e-38	6.34496e-36	0.748794
ZFP36L1	109	5.27417e-38	7.51109e-36	1.03732
HIST2H2BE	110	9.16518e-38	1.29337e-35	0.691281
SLC38A2	111	1.63342e-37	2.28428e-35	0.771756
MT-ND4	112	1.90932e-37	2.64628e-35	0.788542
MT-CO1	113	6.11221e-37	8.39644e-35	0.767392
ZFP36	114	3.10361e-36	4.22608e-34	0.983816
NR4A1	115	3.39433e-36	4.58175e-34	1.00968
GADD45G	116	5.38432e-36	7.1542e-34	1.06812
POLR2A	117	5.39227e-36	7.1542e-34	0.694025
ACOT13	118	7.61312e-36	1.00151e-33	0.788661
MTO1	119	1.90391e-35	2.48356e-33	0.703093
RPPH1	120	3.98862e-35	5.15962e-33	0.625725
ADM	121	4.37293e-35	5.61e-33	0.901814
NXF1	122	4.93554e-35	6.27987e-33	0.645235
CDKN1A	123	6.18927e-35	7.81106e-33	0.830246
MT-ND1	124	9.55925e-35	1.19668e-32	0.795048
SFPQ	125	1.0565e-34	1.312e-32	0.818009
KCNQ1OT1	126	1.47878e-34	1.82184e-32	0.846935
UBE2S	127	2.413e-34	2.94937e-32	0.735552
RF00017_ENSG00000276213	128	3.18698e-34	3.86496e-32	0.578162
AC018362.1	129	3.41521e-34	4.10964e-32	0.502805
BRD2	130	4.1531e-34	4.95913e-32	0.779273
EIF5	131	4.67811e-34	5.54338e-32	0.823521
DDIT3	132	6.41727e-34	7.54661e-32	0.84526
SNHG9	133	1.04985e-33	1.22533e-31	0.611791
AP003733.4	134	2.20084e-33	2.54952e-31	0.632272
SOX4	135	4.06272e-33	4.67153e-31	0.950009
AC018362.3	136	4.68333e-33	5.34554e-31	0.472354
AC103591.3	137	8.0037e-33	9.06872e-31	0.636081
EIF4A2	138	8.55846e-33	9.62702e-31	0.764791
ZFAND2A	139	1.76252e-32	1.96832e-30	0.845579
NDE1	140	2.93298e-32	3.25205e-30	0.592107
FP700111.1	141	5.75951e-32	6.34077e-30	0.611366
SOCS1	142	6.81911e-32	7.45444e-30	0.642559
MIDN	143	8.10484e-32	8.798e-30	0.750472
ATF3	144	9.09787e-32	9.80738e-30	0.949372
MYLIP	145	1.34851e-31	1.44365e-29	0.630943
PPP1R15B	146	1.95322e-31	2.0767e-29	0.664809
PLK2	147	2.07862e-31	2.19499e-29	0.628755
AL442128.2	148	3.28476e-31	3.44522e-29	0.563874
AC098818.2	149	3.37898e-31	3.52026e-29	0.632969
P2RY13	150	4.36059e-31	4.51263e-29	0.973644
AC092944.1	151	5.05768e-31	5.19936e-29	0.399738
IRF1	152	1.04792e-30	1.07019e-28	0.685699
AL031777.3	153	1.18727e-30	1.20457e-28	0.650981
AL136987.1	154	1.5166e-30	1.52872e-28	0.735454
SRSF2	155	4.55602e-30	4.56278e-28	0.703765
BX284668.6	156	6.57793e-30	6.54546e-28	0.619658
EIF4E	157	1.01603e-29	1.00458e-27	1.03385
AL118516.1	158	1.08892e-29	1.06983e-27	0.780853
MT-CO2	159	1.21432e-29	1.18553e-27	0.670285
AC006511.3	160	1.67332e-29	1.62344e-27	0.548152
MIR222HG	161	1.99926e-29	1.92761e-27	0.624899
AC087239.1	162	2.72286e-29	2.60907e-27	0.511641
LINC01970	163	5.01173e-29	4.77283e-27	0.570142
EIF4A1	164	5.05298e-29	4.78277e-27	0.822406
SREBF2-AS1	165	6.23166e-29	5.84527e-27	0.594716
AC096733.2	166	6.25082e-29	5.84527e-27	0.512836
ZFP36L2	167	1.00786e-28	9.36828e-27	0.843381
CCL3	168	1.66088e-28	1.53464e-26	1.37726
AL645728.1	169	4.17101e-28	3.83116e-26	0.520375
DDIT4	170	9.43945e-28	8.61933e-26	0.939432
DDX3X	171	1.53473e-27	1.3932e-25	0.778843
RAB30-DT	172	1.95341e-27	1.76295e-25	0.403268
AC004854.2	173	2.47571e-27	2.22141e-25	0.465975
ZNF3	174	2.49246e-27	2.22359e-25	0.446085
CKB	175	2.65855e-27	2.35324e-25	0.6596
WDR74	176	2.66811e-27	2.35324e-25	0.518811
AC239799.2	177	2.70509e-27	2.37238e-25	0.751206
SNHG12	178	2.79047e-27	2.43351e-25	0.582467
SNHG1	179	7.47568e-27	6.48296e-25	0.577784
WSB1	180	9.39911e-27	8.10568e-25	0.701657
AC007613.1	181	1.66981e-26	1.43207e-24	0.470595
HNRNPH1	182	3.11939e-26	2.66056e-24	0.670229
ADRB2	183	3.18358e-26	2.70048e-24	0.567986
PNISR	184	3.65904e-26	3.08691e-24	0.633349
AC023509.3	185	5.15733e-26	4.32742e-24	0.435497
MAP1LC3B	186	6.65856e-26	5.53137e-24	0.675596
AL021155.2	187	6.66344e-26	5.53137e-24	0.51638
AL135791.1	188	9.27067e-26	7.65472e-24	0.484902
HSPA5	189	1.09713e-25	9.01095e-24	0.875495
ARHGEF37	190	1.36862e-25	1.11816e-23	0.413009
EIF2AK3-DT	191	2.01695e-25	1.63922e-23	0.443435
IL10RB-DT	192	2.43006e-25	1.96468e-23	0.460929
RSRP1	193	3.08267e-25	2.47939e-23	0.560238
ADAMTSL4-AS1	194	4.21646e-25	3.37382e-23	0.410556
GABPB1-AS1	195	5.26176e-25	4.18863e-23	0.475278
EPM2AIP1	196	1.03115e-24	8.16657e-23	0.336817
LINC01220	197	1.43598e-24	1.13151e-22	0.392349
ID1	198	1.46564e-24	1.14905e-22	0.569733
RN7SL472P	199	2.07934e-24	1.62199e-22	0.420578
C6orf62	200	3.74395e-24	2.90587e-22	0.588066
AL135905.2	201	3.99317e-24	3.08388e-22	0.402973
AC008074.2	202	4.20202e-24	3.2291e-22	0.401595
ATF4	203	8.67608e-24	6.63443e-22	0.560723
HNRNPA2B1	204	9.80168e-24	7.45841e-22	0.812371
HYPK	205	1.03769e-23	7.85758e-22	0.380259
AL118558.3	206	1.10601e-23	8.33425e-22	0.42077
MYADM	207	2.61069e-23	1.95776e-21	0.540374
RGS16	208	2.8421e-23	2.12106e-21	0.873551
PRMT9	209	3.82343e-23	2.83977e-21	0.56424
PTP4A1	210	5.627e-23	4.15942e-21	0.380305
CD83	211	6.03389e-23	4.43906e-21	0.751059
RN7SL336P	212	6.0653e-23	4.44111e-21	0.394578
IFRD1	213	9.28913e-23	6.76973e-21	0.631013
AL355881.1	214	1.08548e-22	7.87378e-21	0.504316
NKTR	215	1.65765e-22	1.19683e-20	0.529895
AC005593.1	216	2.0275e-22	1.45708e-20	0.393074
HNRNPA0	217	2.34806e-22	1.67968e-20	0.543806
AC025164.1	218	3.96418e-22	2.82275e-20	0.544961
ZNF445	219	5.61746e-22	3.98173e-20	0.382102
HERPUD1	220	5.94803e-22	4.19688e-20	0.75847
RF00003_ENSG00000274428	221	8.09629e-22	5.68682e-20	0.391787
TSPYL2	222	9.62445e-22	6.72974e-20	0.43679
SDR42E2	223	1.09486e-21	7.62132e-20	0.365881
AC022868.2	224	1.24957e-21	8.65942e-20	0.393572
ZNF821	225	1.50501e-21	1.03832e-19	0.38589
MIR22HG	226	1.53362e-21	1.05338e-19	0.439711
USP51	227	1.7567e-21	1.20129e-19	0.383326
DDN-AS1	228	1.95546e-21	1.33134e-19	0.368888
DUSP28	229	2.07486e-21	1.40647e-19	0.388628
DAZAP2	230	2.09712e-21	1.41538e-19	0.398893
AC079305.3	231	2.9694e-21	1.99541e-19	0.253211
RN7SK	232	3.26989e-21	2.18786e-19	0.459519
Z99572.1	233	3.96553e-21	2.64193e-19	0.401848
LINC00346	234	6.94119e-21	4.60462e-19	0.418897
CEBPB	235	8.92443e-21	5.88072e-19	0.748335
MLH1	236	8.94061e-21	5.88072e-19	0.284838
AP003717.4	237	1.19484e-20	7.82596e-19	0.369337
DNAJA4	238	1.43758e-20	9.3763e-19	0.525247
AC129492.1	239	1.56646e-20	1.01741e-18	0.47414
TNFAIP3	240	1.59781e-20	1.03345e-18	0.729172
ZEB2-AS1	241	2.30323e-20	1.48353e-18	0.325973
KMT2E-AS1	242	2.34372e-20	1.50337e-18	0.340106
DNTTIP2	243	2.40455e-20	1.53604e-18	0.546412
TLE4	244	3.15979e-20	2.01022e-18	0.517045
CD69	245	3.35382e-20	2.1232e-18	0.707222
CEBPA	246	3.36474e-20	2.1232e-18	0.571999
NORAD	247	3.89993e-20	2.45096e-18	0.465911
PNN	248	4.13951e-20	2.59103e-18	0.484498
RF00003_ENSG00000273727	249	6.34662e-20	3.95657e-18	0.385427
KLHL15	250	6.58191e-20	4.08684e-18	0.370387
ITPR2	251	6.78409e-20	4.1956e-18	0.524697
TCTE3	252	8.93563e-20	5.50428e-18	0.246956
TIPARP	253	1.19613e-19	7.33895e-18	0.426917
TLCD2	254	1.93402e-19	1.18196e-17	0.368361
GTF2IP12	255	2.36166e-19	1.43765e-17	0.286689
HIST2H2BD	256	2.76153e-19	1.6745e-17	0.383329
HSPA2	257	3.11652e-19	1.8824e-17	0.418199
LINC00528	258	3.68431e-19	2.21673e-17	0.359715
AL359541.1	259	3.89039e-19	2.33168e-17	0.331199
HIST1H2AE	260	5.05165e-19	3.01603e-17	0.355906
AC110769.2	261	6.652e-19	3.95628e-17	0.352567
SLC2A3	262	7.15402e-19	4.23862e-17	0.559386
HIST1H2AG	263	7.73573e-19	4.56584e-17	0.338872
HIST1H2AC	264	1.28209e-18	7.53857e-17	0.468841
XACT	265	2.06469e-18	1.20944e-16	0.49764
KLF10	266	2.52711e-18	1.47475e-16	0.541569
PNRC1	267	2.78397e-18	1.61856e-16	0.608606
AC132192.2	268	3.19816e-18	1.85243e-16	0.29095
AC017083.1	269	3.34528e-18	1.93044e-16	0.310779
ARRDC3	270	6.60037e-18	3.79473e-16	0.530845
CPEB4	271	6.71317e-18	3.84533e-16	0.482122
SRGAP2-AS1	272	6.86648e-18	3.91869e-16	0.310345
LRP2BP	273	8.32757e-18	4.73512e-16	0.294572
RPL22L1	274	9.6392e-18	5.46093e-16	0.564559
AL671762.1	275	1.02933e-17	5.81027e-16	0.454578
TSPYL1	276	1.05769e-17	5.94876e-16	0.339362
MEF2A	277	1.31891e-17	7.39114e-16	0.505419
AC024257.3	278	1.33386e-17	7.448e-16	0.235968
P2RX7	279	1.42308e-17	7.91773e-16	0.370973
RF00100_ENSG00000202198	280	1.46292e-17	8.1103e-16	0.429272
HIST1H2BF	281	1.57539e-17	8.70277e-16	0.367335
ENSG00000288640	282	1.69025e-17	9.30417e-16	0.319937
SF1	283	1.82468e-17	1.00087e-15	0.438326
TCF7	284	2.67252e-17	1.46076e-15	0.254694
AC067930.8	285	3.65611e-17	1.99136e-15	0.332046
AC005837.1	286	3.80808e-17	2.06688e-15	0.343896
MT-ND2	287	3.94124e-17	2.1317e-15	0.546972
ZFHX3	288	4.26605e-17	2.29937e-15	0.456843
SNORD3B-1	289	4.49399e-17	2.41385e-15	0.361298
GABPB1-IT1	290	5.03462e-17	2.69491e-15	0.291009
UBXN2A	291	5.35874e-17	2.85855e-15	0.333113
RF00003_ENSG00000274210	292	5.8468e-17	3.10821e-15	0.280213
AL133216.2	293	6.00239e-17	3.18004e-15	0.290871
H2AFX	294	6.25306e-17	3.30157e-15	0.442271
ARIH2OS	295	6.79755e-17	3.57689e-15	0.342447
HIST1H4C	296	6.82596e-17	3.57971e-15	0.53541
AC015871.6	297	7.40183e-17	3.86864e-15	0.164834
MTATP6P1	298	8.29401e-17	4.3204e-15	0.532344
CH25H	299	1.23885e-16	6.43166e-15	0.679667
RPL7P32	300	1.36951e-16	7.08632e-15	0.291273
AC010336.8	301	1.73109e-16	8.92747e-15	0.267139
ATXN7L3B	302	1.93993e-16	9.97138e-15	0.380844
POLG2	303	2.43864e-16	1.2458e-14	0.299367
GGCX	304	2.43976e-16	1.2458e-14	0.331991
SNHG3	305	2.80768e-16	1.42897e-14	0.228814
SLC20A1	306	3.66658e-16	1.86001e-14	0.335843
AC084871.1	307	3.91507e-16	1.9796e-14	0.338247
AL662844.4	308	4.43245e-16	2.23393e-14	0.297944
SIK1B	309	4.63869e-16	2.3303e-14	0.328236
TAF7	310	4.83266e-16	2.41992e-14	0.302757
KCTD12	311	8.81669e-16	4.40069e-14	0.526028
JMJD6	312	9.99817e-16	4.97441e-14	0.327246
AL136040.1	313	1.03736e-15	5.1447e-14	0.303318
TNFRSF10D	314	1.16562e-15	5.76239e-14	0.306388
IRF2BP2	315	1.2033e-15	5.9298e-14	0.450305
AC245407.2	316	1.38075e-15	6.78274e-14	0.284233
LINC01277	317	1.51334e-15	7.41058e-14	0.247517
HNRNPUL1	318	1.5582e-15	7.60628e-14	0.354082
SNHG7	319	1.65254e-15	8.0415e-14	0.317626
CHORDC1	320	1.81617e-15	8.81011e-14	0.459254
HIST1H4E	321	2.26876e-15	1.09713e-13	0.285057
SRSF5	322	2.43953e-15	1.17605e-13	0.501258
AC099778.1	323	2.66606e-15	1.28128e-13	0.272128
SIAH2	324	2.73931e-15	1.31242e-13	0.372184
CYB5D2	325	3.8957e-15	1.86071e-13	0.225283
RNVU1-15	326	5.06884e-15	2.41361e-13	0.24488
CSF3R	327	5.82707e-15	2.76617e-13	0.390858
CEBPD	328	6.20142e-15	2.9349e-13	0.658355
TP53INP2	329	6.56063e-15	3.09546e-13	0.226558
AC010378.2	330	6.65461e-15	3.13029e-13	0.297655
CDKN1C	331	6.71305e-15	3.14824e-13	0.445226
FUS	332	6.78239e-15	3.17117e-13	0.509387
PLEKHG2	333	7.01373e-15	3.26949e-13	0.294011
SMAD7	334	7.1165e-15	3.30747e-13	0.450747
AC012360.3	335	8.81136e-15	4.08295e-13	0.250445
AC008875.3	336	8.90033e-15	4.1119e-13	0.296595
PLK3	337	9.48626e-15	4.36959e-13	0.432059
NFYC-AS1	338	9.70326e-15	4.45632e-13	0.232372
AC099343.3	339	1.04409e-14	4.78093e-13	0.269376
TRA2A	340	1.24915e-14	5.70311e-13	0.386866
AC091814.1	341	1.25909e-14	5.73162e-13	0.248449
CDKN2AIP	342	1.2873e-14	5.8429e-13	0.305883
HIST1H2BN	343	1.44982e-14	6.56141e-13	0.217631
SIK1	344	1.53006e-14	6.90439e-13	0.290994
MYO15B	345	1.56106e-14	7.02385e-13	0.250845
TRIB1	346	1.66874e-14	7.48667e-13	0.467052
C12orf57	347	1.68905e-14	7.55595e-13	0.383425
AC010491.1	348	2.06506e-14	9.21149e-13	0.27768
LINC01554	349	2.18779e-14	9.73096e-13	0.256663
AC144652.1	350	2.60621e-14	1.15589e-12	0.274791
RPARP-AS1	351	3.19744e-14	1.41407e-12	0.177667
AC012485.3	352	3.46996e-14	1.53023e-12	0.217673
HIST2H2AC	353	4.20527e-14	1.84925e-12	0.287768
SNAI1	354	4.41714e-14	1.93693e-12	0.35135
Z93930.2	355	5.01125e-14	2.19126e-12	0.197627
BASP1-AS1	356	5.63118e-14	2.45542e-12	0.218144
TCP1	357	5.90664e-14	2.56831e-12	0.354375
KDM6B	358	6.31014e-14	2.7361e-12	0.535899
OLMALINC	359	7.26647e-14	3.14199e-12	0.201892
HES1	360	8.69201e-14	3.74795e-12	0.342088
AP000911.1	361	9.74256e-14	4.1893e-12	0.226916
TUT7	362	1.36935e-13	5.87193e-12	0.381565
SRGAP2	363	1.64194e-13	7.02144e-12	0.426248
AC026979.2	364	1.64842e-13	7.02977e-12	0.26905
AC044849.1	365	2.09792e-13	8.92218e-12	0.352344
INTS6	366	2.19645e-13	9.31572e-12	0.314195
PHYH	367	2.22017e-13	9.39065e-12	0.276801
AC114760.2	368	2.32047e-13	9.78824e-12	0.297968
IDS	369	2.34018e-13	9.8446e-12	0.321604
CITED4	370	2.64095e-13	1.10799e-11	0.295719
TAGAP	371	2.79764e-13	1.17056e-11	0.388261
AL353708.1	372	2.80987e-13	1.17252e-11	0.203726
MAFF	373	3.06489e-13	1.2755e-11	0.42859
SNORD3C	374	3.13325e-13	1.30047e-11	0.194957
AC079305.1	375	3.70897e-13	1.53532e-11	0.211333
PRDM1	376	3.99603e-13	1.64974e-11	0.397096
NABP1	377	4.34117e-13	1.78748e-11	0.388718
RAP2B	378	4.56591e-13	1.87504e-11	0.381364
MOAP1	379	5.31139e-13	2.17543e-11	0.277062
AC018529.2	380	6.18408e-13	2.52619e-11	0.212247
CTDSPL	381	6.22389e-13	2.53579e-11	0.178262
FAM53C	382	6.37289e-13	2.58969e-11	0.294227
AC124319.1	383	6.42052e-13	2.60224e-11	0.408587
UPF2	384	6.67713e-13	2.69647e-11	0.33383
GRID2	385	6.68777e-13	2.69647e-11	0.390668
EGR3	386	7.26547e-13	2.92181e-11	0.416198
AC027290.2	387	9.03689e-13	3.6248e-11	0.243207
IRS2	388	9.61973e-13	3.84864e-11	0.386053
HIST3H2A	389	1.17132e-12	4.67415e-11	0.32562
AC079753.2	390	1.22731e-12	4.885e-11	0.296538
LINC00881	391	1.55681e-12	6.18067e-11	0.157004
ZC3HAV1	392	1.70655e-12	6.75785e-11	0.35403
TMEM9B-AS1	393	1.73023e-12	6.83418e-11	0.151971
TOB2	394	1.9056e-12	7.50779e-11	0.292575
ZSWIM4	395	1.91188e-12	7.51345e-11	0.203554
AL121983.1	396	1.93619e-12	7.58976e-11	0.1957
BEST1	397	1.94424e-12	7.60024e-11	0.1978
AL591846.2	398	1.94865e-12	7.60024e-11	0.203549
AC006333.2	399	1.96214e-12	7.63365e-11	0.207365
IDI1	400	1.99033e-12	7.72396e-11	0.357326
DST	401	2.06939e-12	8.01076e-11	0.306396
AC015912.3	402	2.12647e-12	8.21124e-11	0.238733
HIST2H2BC	403	2.14513e-12	8.26274e-11	0.211238
HSD17B7	404	2.21015e-12	8.49213e-11	0.252666
AC090527.3	405	2.43758e-12	9.34284e-11	0.181932
ALOX12-AS1	406	2.57004e-12	9.8263e-11	0.151638
C16orf72	407	2.8643e-12	1.09244e-10	0.239848
AL163051.1	408	3.37457e-12	1.28391e-10	0.217305
TLR4	409	3.46351e-12	1.31453e-10	0.28578
MRPL18	410	4.23992e-12	1.60527e-10	0.356149
AL031283.2	411	4.67804e-12	1.76684e-10	0.212207
ATP6V1E2	412	5.68632e-12	2.14245e-10	0.226536
SMYD4	413	5.76878e-12	2.16633e-10	0.221951
PRPF38B	414	5.77763e-12	2.16633e-10	0.382279
MAML2	415	6.42642e-12	2.40379e-10	0.374749
LINC00174	416	6.75238e-12	2.51964e-10	0.216882
SLC16A1	417	7.10181e-12	2.64368e-10	0.248252
CKS2	418	7.8486e-12	2.91468e-10	0.434355
AC007032.1	419	8.36371e-12	3.09856e-10	0.208749
HMOX1	420	9.51861e-12	3.51803e-10	0.52455
CSRNP1	421	9.86609e-12	3.6378e-10	0.34722
RYR1	422	1.01036e-11	3.71655e-10	0.226234
LSMEM1	423	1.1754e-11	4.3134e-10	0.166416
AMZ2P1	424	1.18859e-11	4.35152e-10	0.305903
RNU1-59P	425	1.19573e-11	4.36737e-10	0.155574
AC092117.2	426	1.25032e-11	4.55605e-10	0.145917
AC010173.1	427	1.29201e-11	4.69691e-10	0.174624
SPEN	428	1.38825e-11	5.03498e-10	0.291969
PGBD4	429	1.39373e-11	5.04311e-10	0.176889
RPL31P47	430	1.59674e-11	5.76422e-10	0.198201
AL135925.1	431	1.78206e-11	6.41831e-10	0.258119
RTTN	432	2.00762e-11	7.21397e-10	0.239469
RBBP6	433	2.07366e-11	7.43404e-10	0.317293
AP002364.1	434	2.09466e-11	7.49203e-10	0.209204
HOMER1	435	2.15847e-11	7.70251e-10	0.27938
SNHG32	436	2.2606e-11	8.04846e-10	0.339002
DOCK4	437	2.39703e-11	8.51465e-10	0.330882
RASD1	438	2.61579e-11	9.27052e-10	0.310575
ZNF830	439	3.0898e-11	1.09255e-09	0.236512
RNU4-2	440	3.65981e-11	1.29116e-09	0.156291
SRGAP2B	441	3.94906e-11	1.39005e-09	0.44141
AL132639.2	442	4.09151e-11	1.43693e-09	0.219291
KDM7A-DT	443	4.25066e-11	1.48946e-09	0.215543
AC010168.2	444	4.88283e-11	1.70712e-09	0.181142
AC025171.3	445	5.44454e-11	1.89923e-09	0.183308
COA6-AS1	446	5.91319e-11	2.05808e-09	0.20983
HIST1H2BE	447	6.05909e-11	2.10414e-09	0.17681
AL035587.2	448	6.34523e-11	2.1986e-09	0.198278
IFIT2	449	7.00445e-11	2.4216e-09	0.392783
AC080080.1	450	7.10088e-11	2.44949e-09	0.155715
AZIN1-AS1	451	7.84085e-11	2.69875e-09	0.283872
MANEA-DT	452	8.00937e-11	2.75065e-09	0.223528
RF00003_ENSG00000275291	453	8.22047e-11	2.81692e-09	0.156493
AC080013.5	454	8.44227e-11	2.88655e-09	0.168045
RGP1	455	8.8673e-11	3.02521e-09	0.198709
HIST1H2AM	456	8.94872e-11	3.04629e-09	0.150735
AL356488.3	457	9.08174e-11	3.08481e-09	0.188815
AC011611.4	458	9.6872e-11	3.28328e-09	0.168921
TENT5C	459	9.86015e-11	3.33462e-09	0.175397
MIS18BP1	460	1.02962e-10	3.4745e-09	0.343301
ST20-AS1	461	1.04227e-10	3.50958e-09	0.182921
EGR2	462	1.12534e-10	3.78109e-09	0.342488
SEPHS2	463	1.14333e-10	3.83325e-09	0.295036
HIST1H4A	464	1.17063e-10	3.91633e-09	0.178208
ARMCX3	465	1.22268e-10	4.08166e-09	0.288591
PTGER4	466	1.24718e-10	4.15452e-09	0.326774
CCL3L1	467	1.26007e-10	4.18846e-09	0.793332
PRPF38A	468	1.28869e-10	4.27442e-09	0.241207
AL358472.1	469	1.39022e-10	4.60136e-09	0.180069
BOD1L1	470	1.50932e-10	4.98494e-09	0.338737
LINC01852	471	1.5135e-10	4.98813e-09	0.187055
LINC00309	472	1.65382e-10	5.43904e-09	0.145323
BCLAF1	473	1.71029e-10	5.61287e-09	0.253696
PER3	474	1.78044e-10	5.83077e-09	0.196815
AC087190.1	475	1.89778e-10	6.19679e-09	0.202387
SDAD1P1	476	1.9002e-10	6.19679e-09	0.183668
CCNH	477	2.26199e-10	7.36118e-09	0.318771
TLN2	478	2.29509e-10	7.45328e-09	0.255909
AL031775.1	479	2.34275e-10	7.59217e-09	0.151742
AC103706.1	480	2.46442e-10	7.96984e-09	0.198149
AL121603.2	481	2.5696e-10	8.29272e-09	0.171044
REV3L	482	2.57675e-10	8.29852e-09	0.244059
PELI1	483	3.09733e-10	9.95441e-09	0.322125
IRS3P	484	3.1886e-10	1.02266e-08	0.180421
ADAM28	485	3.64381e-10	1.16625e-08	0.318905
TUBB2A	486	3.67981e-10	1.17534e-08	0.304839
PLCB2	487	3.77109e-10	1.20203e-08	0.195658
TPI1	488	3.89731e-10	1.23971e-08	0.407254
HIST1H2BD	489	4.02793e-10	1.27864e-08	0.194151
SFT2D3	490	4.05727e-10	1.28318e-08	0.194739
AC012306.2	491	4.06179e-10	1.28318e-08	0.146011
AC005363.1	492	4.06704e-10	1.28318e-08	0.0750121
RN7SKP203	493	4.37863e-10	1.37869e-08	0.0947268
ZNF395	494	4.60178e-10	1.44602e-08	0.152193
TEX14	495	4.71841e-10	1.47968e-08	0.151919
AC106028.4	496	5.11557e-10	1.60099e-08	0.181567
FAM43A	497	5.16419e-10	1.61295e-08	0.159652
AC124283.1	498	5.4806e-10	1.70834e-08	0.197622
LINC00909	499	6.269e-10	1.95018e-08	0.147508
DUSP6	500	6.72804e-10	2.08879e-08	0.33465
TCF25	501	6.89327e-10	2.13581e-08	0.336024
AC242842.3	502	7.39156e-10	2.28564e-08	0.144642
PPM1N	503	7.50101e-10	2.31488e-08	0.239817
RAB11FIP1	504	7.59264e-10	2.3385e-08	0.209147
CHD9	505	7.91668e-10	2.43348e-08	0.302264
TCEAL9	506	8.23037e-10	2.5249e-08	0.271197
USPL1	507	8.95615e-10	2.74214e-08	0.202552
AC083880.1	508	9.4476e-10	2.88691e-08	0.145006
TMEM52B	509	1.00076e-09	3.05041e-08	0.213497
CDK11A	510	1.0022e-09	3.05041e-08	0.227746
CLN5	511	1.10872e-09	3.36803e-08	0.13285
AP000845.1	512	1.19315e-09	3.61745e-08	0.157103
WDR33	513	1.26819e-09	3.83743e-08	0.215687
AC009053.2	514	1.29964e-09	3.92496e-08	0.158769
ZBTB10	515	1.33701e-09	4.02998e-08	0.191017
AL160272.2	516	1.34146e-09	4.03556e-08	0.14673
HEXA-AS1	517	1.48267e-09	4.45175e-08	0.166862
HIST1H2BC	518	1.56142e-09	4.67914e-08	0.195978
ARGLU1	519	1.69625e-09	5.0734e-08	0.347876
MORF4L2-AS1	520	1.80925e-09	5.40096e-08	0.132668
ZFAS1	521	1.9365e-09	5.76973e-08	0.461238
TECPR2	522	1.95295e-09	5.80758e-08	0.166487
AC091729.3	523	1.9659e-09	5.83494e-08	0.110588
AL592463.1	524	1.98996e-09	5.89508e-08	0.143159
AL359711.2	525	1.99557e-09	5.90042e-08	0.144558
STAB1	526	2.09588e-09	6.18524e-08	0.301412
CHMP1B	527	2.12987e-09	6.27361e-08	0.267307
AL627171.2	528	2.21335e-09	6.50716e-08	0.128917
FAM71A	529	2.2815e-09	6.69485e-08	0.137149
AC104984.3	530	2.32021e-09	6.79558e-08	0.145053
C6orf120	531	2.39052e-09	6.98832e-08	0.191698
SCLT1	532	2.43018e-09	7.09092e-08	0.191687
HIST2H2BF	533	2.51692e-09	7.33023e-08	0.180147
KLF6	534	2.53087e-09	7.35705e-08	0.497582
NBPF19	535	2.57613e-09	7.47462e-08	0.134052
MXD1	536	2.60016e-09	7.53029e-08	0.210708
AP000648.3	537	2.88795e-09	8.34817e-08	0.136322
CEMIP2	538	3.10725e-09	8.9654e-08	0.204049
OLR1	539	3.26187e-09	9.39406e-08	0.415251
AAK1	540	3.44617e-09	9.90646e-08	0.249104
PHLDA2	541	3.47832e-09	9.9804e-08	0.25535
AC105339.6	542	3.50915e-09	1.00503e-07	0.155037
NRP2	543	3.58205e-09	1.02402e-07	0.318141
SPIDR	544	3.62174e-09	1.03346e-07	0.199745
LINC00863	545	3.70675e-09	1.05578e-07	0.139646
CACYBP	546	3.73096e-09	1.06073e-07	0.336617
SERPINE1	547	3.979e-09	1.12918e-07	0.294274
SRSF11	548	4.03291e-09	1.14239e-07	0.308291
AC019069.1	549	4.23951e-09	1.19872e-07	0.135417
AL109615.2	550	4.84877e-09	1.3685e-07	0.156719
EIF4G2	551	4.89064e-09	1.37781e-07	0.311216
AC116366.1	552	5.22649e-09	1.46976e-07	0.156617
C22orf46	553	5.2616e-09	1.47696e-07	0.11539
MTHFR	554	5.44572e-09	1.52588e-07	0.206788
ING1	555	5.61321e-09	1.56998e-07	0.245559
GABARAPL1	556	5.6346e-09	1.57313e-07	0.292624
RBM39	557	6.01082e-09	1.67515e-07	0.372903
AC132938.3	558	6.17165e-09	1.71689e-07	0.0778003
CT70	559	6.26693e-09	1.74028e-07	0.115241
LINC00877	560	6.41005e-09	1.77684e-07	0.0825734
MT-RNR1	561	6.79299e-09	1.87963e-07	0.349358
CEP83-DT	562	6.89269e-09	1.90383e-07	0.132812
TRIM52	563	6.95871e-09	1.91865e-07	0.154289
AC007365.1	564	7.23887e-09	1.99236e-07	0.143532
HIST1H2AH	565	7.34744e-09	2.01866e-07	0.135121
TMEM44-AS1	566	7.38898e-09	2.02649e-07	0.119966
LINC00685_ENSG00000226179	567	8.04362e-09	2.20213e-07	0.169375
TNFRSF25	568	8.33355e-09	2.27749e-07	0.140601
FHAD1	569	8.36697e-09	2.28261e-07	0.111621
AC020765.2	570	8.50027e-09	2.31491e-07	0.132936
AP003086.1	571	8.62811e-09	2.34561e-07	0.130972
GZF1	572	8.80816e-09	2.39037e-07	0.189462
AP003680.1	573	8.94084e-09	2.42214e-07	0.123037
FRMD6-AS1	574	9.00379e-09	2.43494e-07	0.147974
HIST4H4	575	9.84376e-09	2.65747e-07	0.107107
AC027644.3	576	1.00259e-08	2.70193e-07	0.181333
GIHCG	577	1.12065e-08	3.01488e-07	0.127535
CNPPD1	578	1.2155e-08	3.2644e-07	0.164045
C1orf56	579	1.3389e-08	3.5896e-07	0.19952
HES6	580	1.38178e-08	3.69817e-07	0.179495
YPEL5	581	1.39944e-08	3.73899e-07	0.27331
MAP3K8	582	1.46422e-08	3.90534e-07	0.292593
DARS2	583	1.53099e-08	4.07642e-07	0.135953
ATP10D	584	1.54157e-08	4.09757e-07	0.176749
SMAGP	585	1.75936e-08	4.66847e-07	0.141879
ZBTB11-AS1	586	1.76325e-08	4.67081e-07	0.145539
COQ10B	587	1.82514e-08	4.82652e-07	0.201588
MAP3K12	588	1.87439e-08	4.94832e-07	0.143741
DIP2A	589	1.88956e-08	4.9799e-07	0.22948
MID1IP1	590	1.9839e-08	5.21969e-07	0.271277
VAMP1	591	2.02655e-08	5.32286e-07	0.139194
SERPINB9	592	2.04712e-08	5.3678e-07	0.359438
AP000692.2	593	2.12285e-08	5.553e-07	0.166871
AC079753.1	594	2.1275e-08	5.553e-07	0.139877
HIPK1-AS1	595	2.13074e-08	5.553e-07	0.100269
RNF216	596	2.13205e-08	5.553e-07	0.201477
PYCARD-AS1	597	2.14701e-08	5.58258e-07	0.133202
AP000873.2	598	2.1656e-08	5.62151e-07	0.1335
ADAMTSL4	599	2.17834e-08	5.64514e-07	0.0859609
MZF1-AS1	600	2.19073e-08	5.66778e-07	0.0984259
AHSA2P	601	2.23607e-08	5.77546e-07	0.221857
ODC1	602	2.26322e-08	5.83588e-07	0.204677
SERPINH1	603	2.26968e-08	5.84282e-07	0.223696
AL162377.1	604	2.32416e-08	5.97316e-07	0.128638
PNPLA2	605	2.34373e-08	6.01033e-07	0.165963
CACNA1A	606	2.34773e-08	6.01033e-07	0.215366
TSPYL4	607	2.35023e-08	6.01033e-07	0.154323
DENND3	608	2.47678e-08	6.32352e-07	0.211348
FNIP1	609	2.59991e-08	6.62701e-07	0.145572
ZNF687-AS1	610	2.65372e-08	6.75306e-07	0.141094
TUG1	611	2.77611e-08	7.05295e-07	0.159915
AL450326.1	612	2.95344e-08	7.49121e-07	0.130565
SPHK2	613	3.16033e-08	8.0029e-07	0.148937
AC092803.2	614	3.30648e-08	8.35935e-07	0.170075
SOD2	615	3.33383e-08	8.41314e-07	0.461659
AL109840.2	616	3.33859e-08	8.41314e-07	0.167823
CCDC121	617	3.36192e-08	8.45806e-07	0.159308
MT-RNR2	618	3.36731e-08	8.45806e-07	0.298664
AL512625.1	619	3.4022e-08	8.53188e-07	0.12063
LINC01678	620	3.45169e-08	8.64202e-07	0.241535
PCNX2	621	3.491e-08	8.72637e-07	0.171756
SMG1P3	622	3.50194e-08	8.73964e-07	0.129558
JMJD1C	623	3.52194e-08	8.76781e-07	0.274734
LMO4	624	3.52452e-08	8.76781e-07	0.205484
AC073389.1	625	3.54143e-08	8.79578e-07	0.144407
AL139011.1	626	3.67701e-08	9.11164e-07	0.108747
AL669831.1	627	3.68034e-08	9.11164e-07	0.0917455
RPS26P43	628	3.89049e-08	9.61656e-07	0.11748
PTCD1	629	3.93235e-08	9.70459e-07	0.135527
FBRS	630	3.96149e-08	9.761e-07	0.169074
ZCCHC8	631	4.04742e-08	9.95692e-07	0.159919
JOSD1	632	4.07106e-08	9.99921e-07	0.205579
HSPA1B	633	4.20076e-08	1.03015e-06	0.627834
AC009542.1	634	4.28213e-08	1.04845e-06	0.117315
RASL11A	635	4.30026e-08	1.05123e-06	0.172859
SKIL	636	4.34319e-08	1.06005e-06	0.317378
TNFSF9	637	4.36239e-08	1.06307e-06	0.254518
LMOD3	638	4.3869e-08	1.06736e-06	0.126572
AC073352.2	639	4.48438e-08	1.08937e-06	0.148394
CHD7	640	4.53846e-08	1.10031e-06	0.221677
OAT	641	4.54356e-08	1.10031e-06	0.175929
LINC01268	642	4.60339e-08	1.11306e-06	0.183695
AL023806.1	643	4.62775e-08	1.11721e-06	0.132533
ZNF791	644	4.83384e-08	1.16347e-06	0.185708
EIF4A3	645	4.83435e-08	1.16347e-06	0.300387
AL137077.2	646	4.94097e-08	1.18729e-06	0.138832
TCOF1	647	5.04869e-08	1.2113e-06	0.161738
PTGS2	648	5.06362e-08	1.213e-06	0.314444
ATP2C1	649	5.14623e-08	1.23089e-06	0.178529
AC091152.4	650	5.26706e-08	1.25786e-06	0.106164
AC068338.2	651	5.28761e-08	1.25908e-06	0.120038
CMTR2	652	5.28839e-08	1.25908e-06	0.12822
MAN1B1-DT	653	5.34796e-08	1.27131e-06	0.132822
DNAJC3-DT	654	5.40706e-08	1.28339e-06	0.120174
AC084198.2	655	5.50596e-08	1.30487e-06	0.123831
CHD2	656	5.54094e-08	1.31116e-06	0.271932
BDP1	657	5.63978e-08	1.33252e-06	0.221492
AC093495.1	658	5.86507e-08	1.38364e-06	0.0932375
LUC7L3	659	6.49384e-08	1.52965e-06	0.260162
CDK12	660	6.5756e-08	1.54656e-06	0.197378
YTHDC1	661	6.77122e-08	1.59016e-06	0.230714
AC087623.2	662	6.81929e-08	1.59903e-06	0.110579
NECAP2	663	7.24063e-08	1.69527e-06	0.18016
AL031777.1	664	7.3829e-08	1.72598e-06	0.112052
AC092053.3	665	7.52525e-08	1.75661e-06	0.122245
NECAP1	666	7.59094e-08	1.76928e-06	0.0997006
AC093462.1	667	7.69663e-08	1.79123e-06	0.111868
RN7SL2	668	7.9691e-08	1.85186e-06	0.0892714
AC007541.1	669	8.49486e-08	1.97109e-06	0.117362
MLXIPL	670	8.92893e-08	2.06871e-06	0.183401
AC018523.2	671	9.02952e-08	2.0889e-06	0.0972668
AL358472.4	672	9.13046e-08	2.10911e-06	0.126354
RNPC3	673	9.9538e-08	2.29588e-06	0.182571
PRMT5-AS1	674	1.00817e-07	2.32194e-06	0.111507
GPBP1	675	1.01849e-07	2.34222e-06	0.295675
AC069368.2	676	1.03374e-07	2.37292e-06	0.110594
ALPK2	677	1.0349e-07	2.37292e-06	0.104994
LINC01089	678	1.03842e-07	2.3775e-06	0.0967334
FRMD4A	679	1.04546e-07	2.39007e-06	0.243343
AKAP13	680	1.05175e-07	2.40093e-06	0.309743
AL499604.1	681	1.05646e-07	2.40814e-06	0.155537
VASH1	682	1.0653e-07	2.42472e-06	0.201725
DHX36	683	1.10361e-07	2.50825e-06	0.239368
AC079209.1	684	1.11833e-07	2.53798e-06	0.149022
AC011825.4	685	1.12261e-07	2.54398e-06	0.101863
AC083973.1	686	1.13682e-07	2.57243e-06	0.131207
STARD5	687	1.14334e-07	2.58341e-06	0.117363
MARCKSL1	688	1.14616e-07	2.58603e-06	0.196146
TUBA1A	689	1.14837e-07	2.58725e-06	0.239634
AC072061.1	690	1.15183e-07	2.59128e-06	0.104585
FP671120.5	691	1.18692e-07	2.66636e-06	0.214934
ERO1B	692	1.24292e-07	2.78812e-06	0.189453
RNU11	693	1.29902e-07	2.90977e-06	0.0693481
RBM25	694	1.3385e-07	2.99272e-06	0.28748
C5AR2	695	1.33991e-07	2.99272e-06	0.169045
SERTAD2	696	1.34235e-07	2.99386e-06	0.144965
DNAJC7	697	1.38045e-07	3.07442e-06	0.222051
AL163541.1	698	1.43642e-07	3.19448e-06	0.155886
MAN2C1	699	1.51863e-07	3.37167e-06	0.145236
MCF2L	700	1.52043e-07	3.37167e-06	0.188606
AC073263.2	701	1.53023e-07	3.38855e-06	0.123272
LINC01003	702	1.66847e-07	3.68942e-06	0.135239
LINC00484	703	1.81988e-07	4.01849e-06	0.0938314
LINC00987	704	1.82262e-07	4.01883e-06	0.122357
OPRM1	705	1.8914e-07	4.16457e-06	0.103194
HIST1H3J	706	1.90154e-07	4.17324e-06	0.0896969
CHD1	707	1.9031e-07	4.17324e-06	0.274946
AL591115.1	708	1.90685e-07	4.17324e-06	0.125276
SRSF6	709	1.90789e-07	4.17324e-06	0.113837
AC087241.2	710	1.90878e-07	4.17324e-06	0.106678
BCAS2	711	1.91181e-07	4.17399e-06	0.301347
GOLGA8A	712	1.95451e-07	4.26122e-06	0.183704
TENT5A	713	1.95952e-07	4.26616e-06	0.163092
GTF2IP13	714	1.98161e-07	4.30821e-06	0.103802
HIST1H2AK	715	2.06705e-07	4.48525e-06	0.126367
AL158211.3	716	2.06882e-07	4.48525e-06	0.0917769
NOP58	717	2.08766e-07	4.51977e-06	0.175321
PTCH2	718	2.13371e-07	4.61303e-06	0.111608
GASAL1	719	2.17957e-07	4.70564e-06	0.119845
LENG8-AS1	720	2.24786e-07	4.84633e-06	0.120298
MAF	721	2.28416e-07	4.91775e-06	0.253952
BNIPL	722	2.53432e-07	5.44879e-06	0.114614
SON	723	2.54237e-07	5.45853e-06	0.302945
KCP	724	2.61709e-07	5.61121e-06	0.109765
SRGAP2C	725	2.64886e-07	5.67149e-06	0.31888
MED29	726	2.69137e-07	5.75457e-06	0.196134
PRKCA	727	2.73494e-07	5.83969e-06	0.209463
U62317.4	728	2.86787e-07	6.1151e-06	0.132628
ZCCHC14	729	2.87568e-07	6.12334e-06	0.113427
TRIM41	730	2.91633e-07	6.20139e-06	0.0972206
NKRF	731	2.95413e-07	6.27317e-06	0.119993
AD000864.1	732	2.98608e-07	6.33236e-06	0.13023
STX16	733	3.05726e-07	6.47446e-06	0.154139
AC018521.5	734	3.14912e-07	6.65991e-06	0.106351
CAHM	735	3.20621e-07	6.77143e-06	0.121369
AC100810.1	736	3.24537e-07	6.83673e-06	0.260876
PARP16	737	3.24594e-07	6.83673e-06	0.1127
AP001981.2	738	3.2896e-07	6.91931e-06	0.114079
RPS19P1	739	3.30407e-07	6.94034e-06	0.101113
HIST1H3A	740	3.38712e-07	7.10517e-06	0.108659
SETDB2	741	3.40727e-07	7.13779e-06	0.131818
H1FX	742	3.41874e-07	7.15217e-06	0.313077
NRIP3	743	3.51978e-07	7.35365e-06	0.150128
MKNK1	744	3.75145e-07	7.82712e-06	0.231564
AL353708.3	745	3.86934e-07	8.06224e-06	0.0960196
NSMCE3	746	3.95851e-07	8.237e-06	0.12753
AC024940.1	747	4.02226e-07	8.35844e-06	0.100826
SPTBN2	748	4.05564e-07	8.41654e-06	0.131124
AP003307.1	749	4.13267e-07	8.56494e-06	0.107023
INPPL1	750	4.23794e-07	8.77141e-06	0.105403
TOGARAM1	751	4.25666e-07	8.79842e-06	0.151058
AC069281.2	752	4.44112e-07	9.16748e-06	0.1111
AC112907.3	753	4.45245e-07	9.17868e-06	0.124701
FP671120.4	754	4.5521e-07	9.37166e-06	0.233276
PAXBP1-AS1	755	4.56062e-07	9.37675e-06	0.120375
HSPA1L	756	4.74241e-07	9.73762e-06	0.111241
HECA	757	4.7658e-07	9.7611e-06	0.156811
DANCR	758	4.76642e-07	9.7611e-06	0.097788
TNK2	759	4.91564e-07	1.00382e-05	0.122671
AC012291.2	760	4.91808e-07	1.00382e-05	0.109774
JRKL	761	4.92112e-07	1.00382e-05	0.0825232
HLA-DQA1	762	4.96282e-07	1.01099e-05	0.261157
GPR161	763	5.07478e-07	1.03245e-05	0.106822
OSBPL11	764	5.19998e-07	1.05654e-05	0.205883
BTAF1	765	5.24098e-07	1.06347e-05	0.170194
SPG7	766	5.58343e-07	1.13148e-05	0.161521
DEDD2	767	5.81994e-07	1.17787e-05	0.1363
CSAD	768	5.97552e-07	1.20779e-05	0.123592
ITGAX	769	6.13901e-07	1.23922e-05	0.276839
AC083862.3	770	6.6005e-07	1.33052e-05	0.250299
DSEL	771	6.60845e-07	1.33052e-05	0.132915
GSTM2	772	6.6322e-07	1.33357e-05	0.119096
C11orf71	773	6.64926e-07	1.33527e-05	0.0989489
AP004609.3	774	6.87342e-07	1.3785e-05	0.10285
AL356273.3	775	6.94678e-07	1.39142e-05	0.134151
AC011481.3	776	7.01359e-07	1.40299e-05	0.121532
AL683813.1	777	7.18076e-07	1.43458e-05	0.111788
LINC01480	778	7.20817e-07	1.43821e-05	0.221881
EIF3J-DT	779	7.32841e-07	1.46032e-05	0.126211
LINC01588	780	7.4397e-07	1.4806e-05	0.0789851
CENPL	781	7.52562e-07	1.49578e-05	0.0952492
AC064801.1	782	7.85847e-07	1.55994e-05	0.0989069
AL078459.1	783	7.92545e-07	1.57122e-05	0.0903514
ADAMTS4	784	8.09864e-07	1.60251e-05	0.130607
LINC00672	785	8.1039e-07	1.60251e-05	0.122261
AC093001.2	786	8.59727e-07	1.69791e-05	0.0841537
MKNK2	787	8.61862e-07	1.69996e-05	0.183635
TBCC	788	8.63681e-07	1.70139e-05	0.140297
TLNRD1	789	9.06673e-07	1.78381e-05	0.153456
GPR183	790	9.17734e-07	1.80329e-05	0.402981
AL441883.1	791	9.19694e-07	1.80486e-05	0.0919026
ANKRD54	792	9.2936e-07	1.82152e-05	0.0995445
RHBDF2	793	9.41894e-07	1.84376e-05	0.227265
AC034236.2	794	9.54843e-07	1.86675e-05	0.110662
BTG3-AS1	795	9.78696e-07	1.91098e-05	0.0743988
MICAL1	796	1.01642e-06	1.98214e-05	0.15649
RBKS	797	1.04492e-06	2.03517e-05	0.129229
AC093425.1	798	1.05165e-06	2.04571e-05	0.0895223
TBCE_ENSG00000285053	799	1.06056e-06	2.06045e-05	0.0860202
AC007950.2	800	1.07724e-06	2.09026e-05	0.09928
ARHGEF40	801	1.08014e-06	2.09326e-05	0.152696
UGCG	802	1.10313e-06	2.13515e-05	0.200402
ID3	803	1.12503e-06	2.17483e-05	0.184314
AC079015.1	804	1.12996e-06	2.18163e-05	0.221239
ANKRD36C	805	1.17212e-06	2.26023e-05	0.171616
LINC01465	806	1.27534e-06	2.45622e-05	0.0927512
RGPD5	807	1.2934e-06	2.48791e-05	0.129826
AF111167.2	808	1.30258e-06	2.50247e-05	0.0744307
LINC00167	809	1.33101e-06	2.55393e-05	0.0902444
AC093484.2	810	1.37784e-06	2.64053e-05	0.0883068
LINC00653	811	1.38982e-06	2.66019e-05	0.0966968
CCDC144B	812	1.43223e-06	2.73615e-05	0.142619
AL135905.1	813	1.43303e-06	2.73615e-05	0.0875795
HSPE1	814	1.4499e-06	2.76497e-05	0.413412
AC127070.1	815	1.50605e-06	2.86852e-05	0.0925207
SLC50A1	816	1.51592e-06	2.88378e-05	0.103693
AC093635.1	817	1.52128e-06	2.89043e-05	0.0918501
HIST3H2BB	818	1.53531e-06	2.91352e-05	0.105329
AC137767.1	819	1.53964e-06	2.91817e-05	0.10753
KIAA0586	820	1.56296e-06	2.95564e-05	0.111415
FKBP7	821	1.56322e-06	2.95564e-05	0.098934
PILRB	822	1.57391e-06	2.97223e-05	0.0743648
ZC3H12A	823	1.58794e-06	2.99509e-05	0.190103
MT-ND5	824	1.59019e-06	2.99569e-05	0.312411
GATM	825	1.60422e-06	3.01846e-05	0.198447
MAPKAPK5-AS1	826	1.62359e-06	3.05121e-05	0.124503
RPL17P50	827	1.79591e-06	3.37097e-05	0.133744
GPM6B	828	1.81191e-06	3.39689e-05	0.108714
HIST2H4B	829	1.85077e-06	3.46557e-05	0.077133
FKBP4	830	1.87078e-06	3.49881e-05	0.149945
AC012498.1	831	1.88676e-06	3.52444e-05	0.0995566
AL592295.5	832	1.92182e-06	3.58144e-05	0.0806913
NKILA	833	1.92313e-06	3.58144e-05	0.097267
AC108134.2	834	1.92419e-06	3.58144e-05	0.166204
LONRF3	835	1.93664e-06	3.6003e-05	0.0990418
AC008105.3	836	1.97544e-06	3.66803e-05	0.107634
AL022322.2	837	2.00853e-06	3.72502e-05	0.104304
RN7SL4P	838	2.02769e-06	3.75321e-05	0.0450186
TRMT10C	839	2.02857e-06	3.75321e-05	0.165763
AL035530.2	840	2.0449e-06	3.77893e-05	0.0763971
HIST1H2BH	841	2.04834e-06	3.78079e-05	0.130933
SWSAP1	842	2.06055e-06	3.7988e-05	0.111258
AC026250.1	843	2.18731e-06	4.02771e-05	0.104926
AL627232.1	844	2.28285e-06	4.19741e-05	0.0925725
AC241584.1	845	2.28487e-06	4.19741e-05	0.146607
SLC25A37	846	2.31359e-06	4.24513e-05	0.252194
ZNF295-AS1	847	2.34519e-06	4.29804e-05	0.0602524
NKX3-1	848	2.37551e-06	4.34848e-05	0.114086
SGMS1-AS1	849	2.38998e-06	4.36981e-05	0.0758948
TIGD4	850	2.43076e-06	4.43914e-05	0.105588
CAPN10-DT	851	2.4687e-06	4.50312e-05	0.106669
CHD4	852	2.50956e-06	4.5723e-05	0.151763
MFSD11	853	2.51714e-06	4.57766e-05	0.133843
AP005329.3	854	2.51841e-06	4.57766e-05	0.113097
AMD1	855	2.54268e-06	4.61637e-05	0.223625
CREBZF	856	2.54891e-06	4.62228e-05	0.125442
AC008124.1	857	2.61815e-06	4.7423e-05	0.101812
GTF2IP20	858	2.66078e-06	4.81389e-05	0.0809272
AC137834.2	859	2.66971e-06	4.82443e-05	0.0828741
PURB	860	2.67366e-06	4.82596e-05	0.197171
MIR4453HG	861	2.67842e-06	4.82893e-05	0.081689
AC069224.1	862	2.70081e-06	4.8594e-05	0.100421
SOWAHC	863	2.70158e-06	4.8594e-05	0.0996831
CTTNBP2	864	2.72141e-06	4.88941e-05	0.203528
PRPF4	865	2.72852e-06	4.89651e-05	0.138472
AC104581.4	866	2.74557e-06	4.92141e-05	0.162619
HDAC4-AS1	867	2.81907e-06	5.04735e-05	0.0946532
HIST2H3A	868	2.88878e-06	5.1662e-05	0.0926501
AC069185.1	869	2.9177e-06	5.2119e-05	0.10169
TGFB2	870	2.93866e-06	5.24331e-05	0.107382
GNL1	871	2.94524e-06	5.24902e-05	0.123006
AC084018.2	872	3.11088e-06	5.53786e-05	0.0931734
AIMP1	873	3.13174e-06	5.56861e-05	0.162604
GNA13	874	3.15296e-06	5.59686e-05	0.249394
ATAD2B	875	3.15483e-06	5.59686e-05	0.137672
AL356234.1	876	3.16694e-06	5.61191e-05	0.0980483
AC108010.1	877	3.2396e-06	5.73413e-05	0.0644502
GADD45A	878	3.88231e-06	6.86391e-05	0.171372
AC006230.1	879	3.93498e-06	6.94911e-05	0.100793
EML2-AS1	880	4.06427e-06	7.16928e-05	0.084231
AC005332.1	881	4.2041e-06	7.40752e-05	0.129024
PEBP1P3	882	4.23992e-06	7.46217e-05	0.0947922
DAGLB	883	4.25626e-06	7.48244e-05	0.159506
AL031432.4	884	4.31232e-06	7.57172e-05	0.098166
CCDC88B	885	4.3168e-06	7.57172e-05	0.144362
SLC11A1	886	4.33277e-06	7.59114e-05	0.236665
INTS6-AS1	887	4.36e-06	7.63025e-05	0.0614205
AC025263.1	888	4.40035e-06	7.68359e-05	0.0903618
AC113410.4	889	4.40038e-06	7.68359e-05	0.0921807
C1orf61	890	4.47401e-06	7.79577e-05	0.099352
AC011444.2	891	4.47467e-06	7.79577e-05	0.0848617
CBX4	892	4.62983e-06	8.05705e-05	0.152806
FBXO16	893	4.73134e-06	8.22448e-05	0.0613271
SULT1A3	894	4.82748e-06	8.38222e-05	0.0396895
ZBED6	895	4.84305e-06	8.39986e-05	0.12097
NPIPB5	896	4.8563e-06	8.41343e-05	0.107648
AL121933.1	897	4.8751e-06	8.43658e-05	0.146505
TYW5	898	5.02331e-06	8.68339e-05	0.10234
AC023157.3	899	5.13472e-06	8.86611e-05	0.193788
NASP	900	5.63184e-06	9.71367e-05	0.197238
MYO9B	901	5.64973e-06	9.73372e-05	0.185144
RASSF8-AS1	902	5.70431e-06	9.81686e-05	0.104894
AC007728.2	903	5.80184e-06	9.97364e-05	0.0926678
NIFK-AS1	904	5.88422e-06	0.000101041	0.0820307
AC109326.1	905	6.17451e-06	0.000105908	0.151797
AC112236.2	906	6.21226e-06	0.000106438	0.0747686
AC073130.3	907	6.22255e-06	0.000106497	0.0728788
LINC01366	908	6.3027e-06	0.00010775	0.106366
TSC22D1	909	6.34181e-06	0.000108299	0.184685
AC106739.1	910	6.58934e-06	0.000112403	0.105503
SNIP1	911	6.78169e-06	0.000115557	0.104527
ZNF580	912	6.83922e-06	0.000116409	0.0881096
ZSWIM8	913	7.01683e-06	0.000119301	0.117088
TUBA1B	914	7.0442e-06	0.000119636	0.327312
AL356512.1	915	7.0747e-06	0.000119929	0.0783406
AC009061.2	916	7.0769e-06	0.000119929	0.0780078
NET1	917	7.24857e-06	0.000122704	0.133736
UTY	918	7.39e-06	0.000124962	0.106805
FEM1C	919	7.4867e-06	0.000126459	0.121333
ZNF165	920	7.67115e-06	0.000129434	0.0865398
DENND4B	921	7.70817e-06	0.000129917	0.12372
GPANK1	922	7.72092e-06	0.000129991	0.127638
TSPOAP1	923	7.8998e-06	0.000132859	0.0901862
TUBD1	924	7.92534e-06	0.000133144	0.115233
AL353759.1	925	7.99305e-06	0.000134136	0.0779687
RSRC2	926	8.23788e-06	0.000138096	0.234388
DENND4C	927	8.35598e-06	0.000139924	0.147679
AC087190.3	928	8.49803e-06	0.00014215	0.0662664
VPS13D	929	8.80218e-06	0.000147079	0.13604
ALAS1	930	9.09768e-06	0.000151853	0.130048
NAV3	931	9.35272e-06	0.000155942	0.113559
IL10RA	932	9.37526e-06	0.00015615	0.201374
PLXNB2	933	9.43036e-06	0.000156809	0.140335
GPR84	934	9.43501e-06	0.000156809	0.188401
RRAGB	935	9.58569e-06	0.000159143	0.0903369
AL512791.2	936	9.9695e-06	0.000165338	0.0839987
ZNF439	937	9.98147e-06	0.00016536	0.0569999
AL135960.1	938	1.00699e-05	0.000166647	0.116579
HIST1H1E	939	1.0156e-05	0.000167893	0.130396
SLC15A4	940	1.02311e-05	0.000168955	0.126529
AC010733.2	941	1.03451e-05	0.000170656	0.0801712
TRIM38	942	1.03884e-05	0.000171041	0.197546
HCP5	943	1.03905e-05	0.000171041	0.0850029
AC008764.8	944	1.06742e-05	0.000175525	0.10521
SIRT1	945	1.07722e-05	0.000176949	0.135488
NUDT4	946	1.10467e-05	0.000181266	0.175956
FMNL2	947	1.1077e-05	0.000181572	0.175009
AL022069.1	948	1.12025e-05	0.000183434	0.0840355
AC090197.1	949	1.12851e-05	0.000184594	0.0855242
AHSA1	950	1.15968e-05	0.000189445	0.191907
INPP5D	951	1.16062e-05	0.000189445	0.178642
SLC25A45	952	1.16388e-05	0.000189778	0.105685
TMEM202-AS1	953	1.17806e-05	0.000191888	0.0655865
AC099560.2	954	1.18243e-05	0.000192398	0.0576274
ZMAT1	955	1.196e-05	0.000194404	0.130535
ZBTB38	956	1.1978e-05	0.000194492	0.134555
SPTAN1	957	1.21764e-05	0.000197508	0.118207
PURA	958	1.2222e-05	0.000198039	0.172181
PLA2G4B	959	1.26552e-05	0.000204846	0.0442214
HTR7P1	960	1.27257e-05	0.000205771	0.0569864
PLEKHG5	961	1.27864e-05	0.000206538	0.0863526
ITGB1-DT	962	1.28508e-05	0.000207363	0.0786781
AL355304.1	963	1.29412e-05	0.000208538	0.0895312
AC097376.2	964	1.29505e-05	0.000208538	0.0790977
HIST2H4A	965	1.29781e-05	0.000208766	0.0721946
AL121658.1	966	1.31709e-05	0.000211647	0.0910344
AC025159.1	967	1.34893e-05	0.00021654	0.0683046
AL353147.1	968	1.36529e-05	0.000218939	0.0900171
AC025580.3	969	1.38272e-05	0.000221506	0.100061
RRAD	970	1.39294e-05	0.000222913	0.162325
LINC01560	971	1.39678e-05	0.000223297	0.0810899
AC132872.1	972	1.40517e-05	0.000224408	0.0756655
NAA15	973	1.42837e-05	0.000227878	0.123984
C9orf66	974	1.43267e-05	0.000228331	0.0962264
DDX24	975	1.44619e-05	0.000230237	0.197513
AL020997.5	976	1.4476e-05	0.000230237	0.0719993
C17orf49	977	1.46687e-05	0.000233063	0.0892929
ERICH1	978	1.53465e-05	0.000243582	0.192995
RSKR	979	1.56294e-05	0.00024782	0.0593294
ENY2	980	1.6164e-05	0.000256034	0.231532
LYRM2	981	1.62277e-05	0.000256766	0.116503
SLC2A14	982	1.62432e-05	0.000256766	0.0576563
TXLNGY	983	1.63046e-05	0.000257473	0.0911413
SAP25	984	1.63395e-05	0.000257649	0.0667434
SMC5-AS1	985	1.63489e-05	0.000257649	0.0783581
AC064836.4	986	1.64076e-05	0.000258312	0.0919017
SLC25A29	987	1.68688e-05	0.000265222	0.0957828
ELAC1	988	1.68807e-05	0.000265222	0.0531564
TRIM44	989	1.70191e-05	0.000267126	0.17258
AC012368.1	990	1.73982e-05	0.000272538	0.184597
TUBA1C	991	1.73991e-05	0.000272538	0.191012
AC004839.1	992	1.82559e-05	0.00028545	0.0794341
ACIN1	993	1.82601e-05	0.00028545	0.155726
AC009779.2	994	1.84122e-05	0.000287311	0.0891188
AF129075.2	995	1.84162e-05	0.000287311	0.0665118
ARC	996	1.876e-05	0.000292382	0.135542
RNF168	997	1.88903e-05	0.000294117	0.164711
ITPR1	998	1.93283e-05	0.000300635	0.103079
AL603756.1	999	1.94507e-05	0.000302236	0.0735077
ARHGEF1	1000	1.95785e-05	0.000303917	0.103175
PHLDA1	1001	1.98269e-05	0.000307465	0.224765
ZBTB11	1002	1.99726e-05	0.000309416	0.112228
CYP1B1-AS1	1003	2.02541e-05	0.000313463	0.0546681
AL357093.2	1004	2.06816e-05	0.000319761	0.073573
MYO1F	1005	2.09343e-05	0.000323347	0.1718
RBM5	1006	2.0977e-05	0.000323683	0.135243
AC026124.2	1007	2.11562e-05	0.000326124	0.0457474
AC093323.1	1008	2.14743e-05	0.000330699	0.0889871
CAND1	1009	2.2065e-05	0.00033946	0.110817
NR2C1	1010	2.23217e-05	0.00034307	0.0998865
AL078587.2	1011	2.27238e-05	0.000348904	0.0476512
BPTF	1012	2.28973e-05	0.000351221	0.163225
KCNB1	1013	2.29465e-05	0.000351628	0.0700328
AL133259.1	1014	2.33559e-05	0.000357547	0.0709876
FKBP15	1015	2.34082e-05	0.000357996	0.110777
POU3F1	1016	2.38436e-05	0.000364296	0.0979652
AC090114.3	1017	2.44835e-05	0.000373704	0.0654842
PADI2	1018	2.54465e-05	0.000388021	0.191294
STAG3L5P-PVRIG2P-PILRB	1019	2.5735e-05	0.000392035	0.064916
RBM12B	1020	2.58005e-05	0.000392648	0.0739576
AC135279.3	1021	2.60621e-05	0.00039624	0.0712583
NBPF10	1022	2.61437e-05	0.000396976	0.109108
NSUN6	1023	2.61616e-05	0.000396976	0.0884068
AC142472.1	1024	2.6764e-05	0.00040572	0.0682449
MEPCE	1025	2.71864e-05	0.000411721	0.0907747
AC022966.3	1026	2.72793e-05	0.000412725	0.0678717
AP001816.1	1027	2.7429e-05	0.000414587	0.0857211
CCNL2	1028	2.74995e-05	0.000415024	0.135978
SLX1A-SULT1A3	1029	2.75114e-05	0.000415024	0.0453529
FAM76B	1030	2.79396e-05	0.000420835	0.110575
PHACTR1	1031	2.79508e-05	0.000420835	0.180456
THUMPD3-AS1	1032	2.79812e-05	0.000420884	0.11821
PTOV1-AS1	1033	2.87875e-05	0.000432593	0.0530326
SMG1P1	1034	2.89764e-05	0.00043501	0.085005
RN7SL832P	1035	2.90518e-05	0.000435721	0.075435
ANKS1A	1036	2.91049e-05	0.000436096	0.101189
TOPORS	1037	2.93186e-05	0.00043857	0.107904
SETX	1038	2.93265e-05	0.00043857	0.160298
AC114977.1	1039	2.93611e-05	0.000438665	0.0900629
HIST1H2AJ	1040	3.03709e-05	0.000453315	0.0585069
VPS13C	1041	3.08513e-05	0.000460043	0.197135
ZNF844	1042	3.1223e-05	0.000465139	0.0803103
AC015871.5	1043	3.14219e-05	0.000467653	0.0637535
ZBED5	1044	3.15401e-05	0.000468962	0.0655026
MAGIX	1045	3.1771e-05	0.000471944	0.0830394
AHI1	1046	3.23922e-05	0.000480712	0.152826
CSF1	1047	3.31169e-05	0.000490996	0.14558
LINC01004	1048	3.333e-05	0.000493684	0.0607328
AL606760.3	1049	3.3475e-05	0.000495311	0.0687992
BCO2	1050	3.35036e-05	0.000495311	0.0904907
COPB1	1051	3.4362e-05	0.000507518	0.116035
DOCK2	1052	3.45848e-05	0.000510323	0.13627
SPRY1	1053	3.46704e-05	0.000510686	0.210476
ZDHHC21	1054	3.46752e-05	0.000510686	0.109693
TARBP1	1055	3.48184e-05	0.000512309	0.0767281
AC126614.1	1056	3.50721e-05	0.000515089	0.0657889
ZC3H11A	1057	3.50737e-05	0.000515089	0.105109
AF213884.3	1058	3.54508e-05	0.000520136	0.0874042
PDE12	1059	3.55488e-05	0.000521081	0.112066
SMG7-AS1	1060	3.63006e-05	0.000531598	0.0513298
AC008532.1	1061	3.65242e-05	0.000534369	0.077575
PSME3	1062	3.67352e-05	0.000536461	0.0786848
AP002381.2	1063	3.67363e-05	0.000536461	0.068169
HERC2	1064	3.75301e-05	0.000547537	0.118536
AL136038.3	1065	3.77028e-05	0.00054954	0.0743827
SULT1A4	1066	3.80383e-05	0.00055391	0.0333741
ABR	1067	3.84985e-05	0.000560086	0.137916
HIST1H4I	1068	3.88616e-05	0.00056484	0.0657589
MT-ATP8	1069	3.8953e-05	0.000565639	0.198466
ASTE1	1070	3.93851e-05	0.000571379	0.067092
FAM72B	1071	3.97196e-05	0.000575693	0.0660776
SFMBT2	1072	4.00161e-05	0.00057945	0.175817
LINC01686	1073	4.0105e-05	0.000580196	0.0777514
AC027031.2	1074	4.0689e-05	0.000588096	0.112105
LINC-PINT	1075	4.09721e-05	0.000591637	0.130901
AC092428.1	1076	4.16704e-05	0.000600908	0.0403694
AC098588.1	1077	4.16916e-05	0.000600908	0.0421124
DHX38	1078	4.19815e-05	0.000604526	0.0895265
PALD1	1079	4.22913e-05	0.000608423	0.164287
RASAL2	1080	4.25969e-05	0.000612251	0.129344
TCF7L2	1081	4.2962e-05	0.000616927	0.119133
ANKHD1	1082	4.32114e-05	0.000619933	0.0904887
AL031281.2	1083	4.32511e-05	0.000619933	0.0652485
CENPC	1084	4.45281e-05	0.000637647	0.128499
RNF122	1085	4.48361e-05	0.000641466	0.0954557
RF00017_ENSG00000275586	1086	4.5458e-05	0.000649764	0.0608587
RGPD6	1087	4.55759e-05	0.00065085	0.0633031
PNMA8A	1088	4.56241e-05	0.000650939	0.0631843
SLC26A11	1089	4.58714e-05	0.000653633	0.0656116
ZNF503	1090	4.5897e-05	0.000653633	0.0780659
ETF1P2	1091	4.75877e-05	0.000676474	0.0967562
PHF1	1092	4.75881e-05	0.000676474	0.120788
C2orf92	1093	4.77218e-05	0.000677754	0.0611396
ZBTB21	1094	4.7883e-05	0.000679422	0.0758767
TSC22D2	1095	4.90403e-05	0.000695208	0.176291
MPV17L2	1096	4.92435e-05	0.000697452	0.100388
AL355512.1	1097	5.04905e-05	0.000714462	0.0605335
RERE	1098	5.10492e-05	0.00072171	0.152395
NFKBID	1099	5.12195e-05	0.000723458	0.218801
ATP5MFP4	1100	5.18478e-05	0.000731667	0.0581968
AP001462.1	1101	5.24516e-05	0.000739515	0.0747058
AMPD2	1102	5.26612e-05	0.000741796	0.137215
KCNMB1	1103	5.31238e-05	0.000747634	0.136669
GAK	1104	5.32805e-05	0.000749161	0.133545
PACERR	1105	5.38654e-05	0.000756699	0.0700857
RCCD1	1106	5.44002e-05	0.000763522	0.0505676
PDK4	1107	5.5727e-05	0.000781437	0.28739
GOLGA8B	1108	5.59672e-05	0.000784096	0.0814543
HIST1H4K	1109	5.6036e-05	0.000784352	0.0802827
PATL2	1110	5.72493e-05	0.000800614	0.0700932
FRAT1	1111	5.76622e-05	0.000805662	0.087991
ABCC4	1112	5.82311e-05	0.000812879	0.118086
SKI	1113	5.84706e-05	0.000815489	0.146293
WASHC1	1114	5.86555e-05	0.000817334	0.0796819
AC116667.1	1115	6.04666e-05	0.000841815	0.0863434
AC004837.4	1116	6.10285e-05	0.000848875	0.0664643
AL133551.1	1117	6.16444e-05	0.000856675	0.0725482
ZBTB24	1118	6.20695e-05	0.000861587	0.103173
AC013400.1	1119	6.21088e-05	0.000861587	0.0553813
AP000769.1	1120	6.24519e-05	0.000865572	0.0727078
DUSP10	1121	6.27518e-05	0.000868953	0.103049
AC005540.1	1122	6.30202e-05	0.000871892	0.0550578
SPA17	1123	6.38113e-05	0.00088205	0.0529827
COX18	1124	6.42229e-05	0.000886951	0.0860039
PDGFB	1125	6.43444e-05	0.000887839	0.239536
NFKB2	1126	6.51582e-05	0.000898269	0.128395
EPS8	1127	6.52726e-05	0.000899048	0.131244
USP40	1128	6.56624e-05	0.000903615	0.075995
CCDC144A	1129	6.57232e-05	0.000903651	0.0709201
SOX6	1130	6.69235e-05	0.00091934	0.0641725
JPX	1131	6.82878e-05	0.000937251	0.127818
USP9Y	1132	6.84086e-05	0.000938081	0.0895838
AC025181.2	1133	6.91337e-05	0.000946641	0.0834243
AL137802.2	1134	6.91549e-05	0.000946641	0.060124
SNX29	1135	6.9733e-05	0.000953714	0.138998
PAXBP1	1136	6.99693e-05	0.000956104	0.139236
MIGA2	1137	7.05515e-05	0.000963212	0.0704086
RASA1	1138	7.06256e-05	0.000963375	0.0993417
SESN2	1139	7.10339e-05	0.000968094	0.105193
TIGD2	1140	7.16878e-05	0.000976149	0.0647223
EP300	1141	7.31124e-05	0.000994674	0.126958
RND3	1142	7.36364e-05	0.00100093	0.113273
TSPAN10	1143	7.42009e-05	0.00100772	0.0481469
IRGQ	1144	7.43642e-05	0.00100905	0.053193
AL117339.5	1145	7.47461e-05	0.00101335	0.0746501
LINC01816	1146	7.62248e-05	0.00103249	0.0488779
NUAK2	1147	7.72635e-05	0.00104565	0.0720041
SIPA1L2	1148	8.04307e-05	0.00108757	0.174765
AL353743.2	1149	8.10599e-05	0.00109512	0.0565872
LUZP1	1150	8.16032e-05	0.0011015	0.148908
EMC1	1151	8.20709e-05	0.00110685	0.082013
PRRT3	1152	8.21603e-05	0.0011071	0.0613297
RNF139-AS1	1153	8.29196e-05	0.00111636	0.05916
SMG1P2	1154	8.38828e-05	0.00112835	0.0468104
IREB2	1155	8.40663e-05	0.00112984	0.0996751
GTF2A1	1156	8.61482e-05	0.00115682	0.104835
KANSL2	1157	8.63108e-05	0.001158	0.0870604
AC012615.1	1158	8.65086e-05	0.00115965	0.0679675
AC113143.3	1159	8.67092e-05	0.00116133	0.0638596
MAML3	1160	8.70486e-05	0.00116488	0.120743
DHRS7B	1161	8.74976e-05	0.00116987	0.0637753
TTC14	1162	8.84094e-05	0.00118105	0.123384
CHKB-CPT1B	1163	8.88417e-05	0.0011858	0.0555354
ERBB3	1164	9.00799e-05	0.0012013	0.042164
GSN-AS1	1165	9.02667e-05	0.00120276	0.0822729
ADPGK-AS1	1166	9.15147e-05	0.00121834	0.0674979
AL133338.1	1167	9.36289e-05	0.00124542	0.0642031
ANKRD49	1168	9.45716e-05	0.00125688	0.0977256
CNBD2	1169	9.48602e-05	0.00125964	0.0602398
EMC3-AS1	1170	9.55298e-05	0.00126744	0.0780141
AC009088.1	1171	9.64801e-05	0.00127896	0.0488186
RECQL5	1172	9.871e-05	0.00130641	0.0560937
TMEM259	1173	9.87193e-05	0.00130641	0.142244
SPRY2	1174	9.88628e-05	0.0013072	0.147785
CCNT1	1175	0.000100346	0.00132568	0.107447
UBR5	1176	0.00010093	0.00133226	0.105256
LINC02029	1177	0.000101434	0.00133777	0.0512043
PLEKHA3P1	1178	0.000102278	0.00134776	0.0799967
HIST2H3PS2	1179	0.000102603	0.0013509	0.068026
HIST1H2AI	1180	0.000103516	0.00136176	0.0515808
FBXL14	1181	0.000103776	0.00136402	0.0782537
ANKRD36B	1182	0.000106563	0.00139879	0.0846404
CASC15	1183	0.000106601	0.00139879	0.0397607
AL358933.1	1184	0.000106692	0.0013988	0.066953
CACNB4	1185	0.00010775	0.00141148	0.0662969
RASGEF1C	1186	0.00010802	0.00141382	0.113197
ATM	1187	0.000109913	0.00143739	0.15958
CXorf21	1188	0.000110126	0.00143896	0.144614
MON2	1189	0.00011079	0.00144563	0.0890703
CLK4	1190	0.000110822	0.00144563	0.102684
STX16-NPEPL1	1191	0.000111995	0.00145969	0.0695363
AC245452.1	1192	0.000112307	0.00146243	0.0745552
HELZ	1193	0.000112393	0.00146243	0.12142
SF3B1	1194	0.000112887	0.00146762	0.185121
RBM6	1195	0.000114769	0.00149084	0.130895
PIP4P1	1196	0.00011497	0.00149221	0.105689
LINC01136	1197	0.000115284	0.00149503	0.0594234
PARP14	1198	0.000118612	0.0015369	0.168623
SRRM2	1199	0.000119405	0.0015459	0.221851
MYC	1200	0.00012103	0.00156465	0.146412
AC009812.1	1201	0.000121056	0.00156465	0.0840326
N4BP2L2	1202	0.000121927	0.0015746	0.154854
MAPK8IP3	1203	0.000122286	0.00157793	0.0748464
MAST4	1204	0.000122598	0.00158064	0.0636686
AC034111.1	1205	0.000123698	0.0015935	0.0456187
GDF15	1206	0.000124199	0.00159863	0.0618247
NOTCH4	1207	0.000124546	0.00160176	0.05703
PRPF4B	1208	0.000125479	0.00161242	0.164683
LCOR	1209	0.000127191	0.00163308	0.0983588
PRRC2A	1210	0.000128546	0.00164911	0.103468
AL391121.1	1211	0.000129091	0.00165473	0.0850168
PHIP	1212	0.000129556	0.00165933	0.137713
AL109918.1	1213	0.000130511	0.00167017	0.0754062
COPA	1214	0.000132076	0.00168881	0.149761
AL008635.1	1215	0.000132516	0.00169304	0.0537039
AL138824.1	1216	0.00013508	0.00172438	0.0607891
LDLR	1217	0.000140177	0.00178798	0.0706569
GOLGB1	1218	0.000140957	0.00179645	0.188357
AC239798.2	1219	0.000147179	0.00187421	0.057208
RND1	1220	0.000147517	0.00187698	0.0672062
GRASP	1221	0.000150679	0.00191563	0.232978
AGAP9	1222	0.000151442	0.00192376	0.0645589
NCKAP1L	1223	0.000154726	0.00196387	0.146004
RRP12	1224	0.000155693	0.00197453	0.0631639
CHI3L2	1225	0.000156436	0.00198233	0.0627308
ANKRD44	1226	0.00016283	0.00206167	0.0965588
RHOF	1227	0.000164272	0.00207823	0.0571839
GBF1	1228	0.000164591	0.00208058	0.0737693
AATK	1229	0.000165677	0.00209259	0.0970648
AC004908.2	1230	0.000166089	0.0020961	0.044008
DLGAP1-AS2	1231	0.000166493	0.00209948	0.0682647
ZNF281	1232	0.000166743	0.00210093	0.0982456
AC027307.3	1233	0.000168762	0.00212465	0.0557572
ZNF394	1234	0.000171481	0.00215713	0.0718597
KLB	1235	0.000172019	0.00216116	0.0497424
HIST1H2BJ	1236	0.00017208	0.00216116	0.0813263
AC131206.1	1237	0.000172833	0.00216886	0.0518997
LINC01347	1238	0.000173347	0.00217356	0.0433702
AC087482.1	1239	0.000175727	0.00220162	0.0661026
MDM4	1240	0.000176076	0.00220421	0.147068
SLC4A7	1241	0.000182116	0.00227799	0.184169
TRAM2-AS1	1242	0.000184303	0.00230349	0.0546903
AL162458.1	1243	0.000184672	0.00230625	0.0571213
Z84485.1	1244	0.000185026	0.00230881	0.0491174
AL513218.2	1245	0.000188851	0.00235465	0.0598759
BTBD19	1246	0.000189276	0.00235806	0.0869702
AL121944.1	1247	0.000190063	0.00236596	0.0775577
KBTBD7	1248	0.000190986	0.00237554	0.103403
AC067852.5	1249	0.000191522	0.0023803	0.056492
DDX60L	1250	0.000191848	0.00238245	0.104498
AC011498.1	1251	0.000192528	0.00238897	0.0643957
SH3TC1	1252	0.000193555	0.00239981	0.134215
AC004938.2	1253	0.000199359	0.00246979	0.055449
ARHGAP27	1254	0.000200713	0.00248458	0.0939098
CDKN2B	1255	0.000200969	0.00248495	0.0770459
AC012184.3	1256	0.000201063	0.00248495	0.0598703
PARTICL	1257	0.000201246	0.00248524	0.0666292
DENND6A-DT	1258	0.000202079	0.00249354	0.0587952
TNRC6B	1259	0.000202669	0.00249883	0.146027
ITFG2	1260	0.000202856	0.00249915	0.0595953
AC117382.2	1261	0.000207718	0.00255703	0.0526532
AC098850.3	1262	0.000209019	0.00256985	0.0487523
GLUD1P3	1263	0.000209091	0.00256985	0.08918
POLR2B	1264	0.000209857	0.00257722	0.0872462
NUMA1	1265	0.000211106	0.00259052	0.112513
MCM3AP	1266	0.000216195	0.00265087	0.0831919
AP000442.1	1267	0.000217244	0.00266038	0.0501335
AL158152.1	1268	0.000217314	0.00266038	0.0556773
AL590399.1	1269	0.000217998	0.00266545	0.0451524
ZNF252P-AS1	1270	0.000218071	0.00266545	0.0543159
AC022098.3	1271	0.000218359	0.00266687	0.061283
PART1	1272	0.000219552	0.00267933	0.0585363
PTPRE	1273	0.000226402	0.00275971	0.189234
NKAPL	1274	0.000226495	0.00275971	0.0702898
HSD17B7P2	1275	0.000227112	0.00276507	0.0699674
AC008608.2	1276	0.000227354	0.00276584	0.064866
BMS1P2	1277	0.00022779	0.00276898	0.0394229
LINC00324	1278	0.000232449	0.0028234	0.100744
MARCKSL1P2	1279	0.000235554	0.00285887	0.0463511
ZNF699	1280	0.000236274	0.00286537	0.0756653
AC127002.1	1281	0.000236819	0.00286974	0.0609995
UAP1	1282	0.000237395	0.00287448	0.101216
DIO2	1283	0.000240306	0.00290746	0.0720355
ERV3-1	1284	0.000242685	0.00293395	0.0525363
HIF1A-AS2	1285	0.000243188	0.00293775	0.0725127
RAPGEF1	1286	0.000247686	0.00298976	0.14813
AC074099.1	1287	0.000248372	0.00299571	0.0542847
WHAMMP2	1288	0.00025353	0.00305555	0.0391564
ZNF708	1289	0.000254913	0.00306983	0.0981794
ASH1L	1290	0.000255388	0.00307317	0.156714
AC073195.1	1291	0.000255675	0.00307408	0.0520225
AC025171.2	1292	0.00025586	0.00307408	0.0568936
AC139530.2	1293	0.000260058	0.0031221	0.0587008
CHCHD7	1294	0.000260402	0.00312382	0.174676
BIRC6	1295	0.000262936	0.00315178	0.115785
AKAP9	1296	0.000271341	0.00325002	0.15014
ARL4D	1297	0.000272137	0.00325634	0.0905379
SLC24A4	1298	0.000272288	0.00325634	0.0744948
JMJD7-PLA2G4B	1299	0.000273496	0.00326827	0.0387037
RPS5P2	1300	0.000278923	0.00333056	0.0789661
TNIP1	1301	0.000282204	0.00336714	0.0870745
AC092164.1	1302	0.000285631	0.00340542	0.0408178
RGPD8	1303	0.000290472	0.00346047	0.0558905
UVRAG	1304	0.000291362	0.00346842	0.119741
LAMTOR5-AS1	1305	0.000291983	0.00347314	0.0346798
AL024507.2	1306	0.000293038	0.00348302	0.064219
SETP16	1307	0.000293311	0.0034836	0.052826
FBLIM1	1308	0.000293882	0.00348772	0.0477029
KLHL3	1309	0.00029542	0.00350329	0.0397684
ITGB2-AS1	1310	0.000295816	0.00350531	0.0905264
SREBF1	1311	0.000303236	0.00359013	0.0678265
RNMT	1312	0.000303437	0.00359013	0.138916
DUSP5	1313	0.000306594	0.00362472	0.112119
DLEU1	1314	0.000307155	0.00362859	0.0838235
RTCA-AS1	1315	0.000308819	0.00364548	0.0546198
AC245140.2	1316	0.000315406	0.0037204	0.075965
ATG10	1317	0.000325948	0.00384183	0.0709653
AC132942.1	1318	0.000328445	0.00386832	0.0801291
RANBP2	1319	0.000329431	0.00387699	0.18366
SLC25A25	1320	0.000330511	0.00388676	0.0862077
AC139019.1	1321	0.000335615	0.00394379	0.0553039
AL512625.4	1322	0.000340781	0.00400147	0.0919767
SLC30A1	1323	0.000342849	0.0040227	0.0790471
SLC12A2	1324	0.0003433	0.00402496	0.0591953
NDRG1	1325	0.000349152	0.00409048	0.0740912
CCDC117	1326	0.000350069	0.00409813	0.0809626
AC016405.3	1327	0.000353784	0.0041385	0.0404604
AP001056.2	1328	0.000355061	0.00415031	0.0589339
MEF2D	1329	0.000367149	0.00428838	0.0937487
AL137003.2	1330	0.000371502	0.00433596	0.045173
ZNF669	1331	0.00037255	0.00434367	0.0788363
AC004817.3	1332	0.000372723	0.00434367	0.0728265
TBCE_ENSG00000284770	1333	0.000373202	0.00434599	0.0484992
PIGC	1334	0.000375194	0.00436592	0.0546272
LOH12CR2	1335	0.000378976	0.0044057	0.063802
AL139274.2	1336	0.000379181	0.0044057	0.0665194
GGA1	1337	0.000380008	0.00440996	0.103447
AC022506.2	1338	0.000380115	0.00440996	0.0551136
OSM	1339	0.000384815	0.00446115	0.16134
AL391840.3	1340	0.000386206	0.00447394	0.0527085
LUC7L	1341	0.000389282	0.00450621	0.106448
AC138409.2	1342	0.000393375	0.00455019	0.0551839
AC011891.2	1343	0.000398289	0.00460361	0.05071
AC005264.1	1344	0.000402187	0.0046452	0.0571217
ZRANB2	1345	0.000405807	0.00468353	0.149179
EID2B	1346	0.000409574	0.00472349	0.0476227
C17orf67	1347	0.00041072	0.00473319	0.0480064
AC026471.1	1348	0.000413289	0.00475926	0.0584792
ATG12	1349	0.000414012	0.00476406	0.104595
CR381670.1	1350	0.000418862	0.00481629	0.0604455
AL050341.2	1351	0.000423041	0.00486074	0.0449504
NLRP3	1352	0.000425177	0.00488168	0.201807
AC012640.2	1353	0.000425914	0.00488653	0.0540319
DIP2B	1354	0.000432624	0.00495984	0.0760565
NBPF14	1355	0.000433532	0.00496658	0.0776372
AC092171.3	1356	0.000438766	0.00502284	0.054991
ABHD5	1357	0.000441283	0.00504793	0.0907058
SQLE	1358	0.000441944	0.00505176	0.0640371
BCLAF1P2	1359	0.000444466	0.00507686	0.0510092
PCM1	1360	0.000444929	0.00507841	0.138172
PTPN7	1361	0.000448674	0.00511739	0.0744166
BOLA1	1362	0.000449421	0.00511886	0.0640034
MIR17HG	1363	0.000449711	0.00511886	0.0531207
ZRANB1	1364	0.000449792	0.00511886	0.0911036
RLIM	1365	0.000453599	0.0051584	0.0935703
AL121601.1	1366	0.000454385	0.00516356	0.0447558
ESCO1	1367	0.000467233	0.00530568	0.106073
PFAS	1368	0.000469112	0.00532311	0.0452783
AL354733.1	1369	0.000470429	0.00533322	0.0412254
HIST1H1C	1370	0.000470879	0.00533322	0.133339
ZNF703	1371	0.000471033	0.00533322	0.0929452
CDK5RAP3	1372	0.000471407	0.00533356	0.077499
DDB2	1373	0.000472895	0.0053465	0.0846075
PABPC1L	1374	0.000481911	0.00544447	0.0614534
WDFY3	1375	0.000482497	0.00544712	0.0873054
BPGM	1376	0.00048891	0.00551552	0.0650431
AC009309.1	1377	0.000492235	0.00554899	0.0397707
RDH10	1378	0.000498337	0.0056137	0.0660026
PKDCC	1379	0.000503277	0.00566524	0.0534828
NFIL3	1380	0.00050422	0.00567175	0.15133
PSME4	1381	0.000506006	0.00568771	0.0861162
ANKRD36	1382	0.000508502	0.00571164	0.0887886
POLH	1383	0.000510322	0.00572793	0.055334
HPS4	1384	0.000515544	0.00578236	0.0850741
PKN2	1385	0.00051947	0.00582219	0.1375
LINC01135	1386	0.000526387	0.00589545	0.0427811
MAP3K2-DT	1387	0.000526766	0.00589545	0.0513331
AF117829.1	1388	0.000528829	0.00591428	0.0809541
PGGT1B	1389	0.000533542	0.00596269	0.110109
YTHDC2	1390	0.000538074	0.00600901	0.105598
ABHD15	1391	0.000543813	0.00606874	0.0761381
SAMD4A	1392	0.000544782	0.00607518	0.0898431
CDC42BPB	1393	0.000545918	0.00607812	0.0863738
MDM2	1394	0.000546128	0.00607812	0.150069
ENSG00000288632	1395	0.000546544	0.00607812	0.0408903
ATXN7	1396	0.000546612	0.00607812	0.0996718
SENP7	1397	0.000547029	0.0060784	0.0919195
AC100861.2	1398	0.000549311	0.0060994	0.0546508
MOGAT1	1399	0.000550215	0.00610506	0.0550481
ZNF274	1400	0.000555485	0.00615619	0.0537427
AL139393.3	1401	0.000555616	0.00615619	0.0587728
CTR9	1402	0.000557768	0.00617562	0.0906844
EDN1	1403	0.000558885	0.00618359	0.0886733
ARHGAP27P1-BPTFP1-KPNA2P3	1404	0.000559654	0.00618769	0.076619
ENTPD1-AS1	1405	0.000564439	0.00623614	0.0410431
AL353704.1	1406	0.000569347	0.00628589	0.0441517
RN7SL827P	1407	0.000572354	0.0063146	0.0628895
KMT2C	1408	0.000576654	0.00635752	0.122627
MTF2	1409	0.00057959	0.00638233	0.0939708
ZMYND8	1410	0.000579726	0.00638233	0.0917661
UVSSA	1411	0.000587861	0.00646731	0.0828833
CXCL2	1412	0.000591798	0.006506	0.131447
GHET1	1413	0.000593754	0.00652289	0.0468071
FLVCR1-DT	1414	0.000598593	0.0065714	0.0583457
AC005614.1	1415	0.000601753	0.00660142	0.0480328
CDC42EP3	1416	0.000603954	0.00662089	0.0813671
AL596325.1	1417	0.000608167	0.00666237	0.0465412
PRRG2	1418	0.000611078	0.00668953	0.0587955
AC106707.1	1419	0.000613837	0.006715	0.061063
AC132938.6	1420	0.000617843	0.00675407	0.0485472
KIAA1109	1421	0.00062082	0.00678183	0.104092
FAM157A	1422	0.000623886	0.00681053	0.0501651
NEDD9	1423	0.000624447	0.00681186	0.10789
LACC1	1424	0.000631084	0.00687944	0.0665502
CLASP2	1425	0.000635687	0.00692476	0.0800262
UBR3	1426	0.000638491	0.00695042	0.0673747
ZNF75A	1427	0.000639096	0.00695213	0.0445244
AL442663.2	1428	0.000639717	0.00695401	0.0408295
TMEM144	1429	0.000643978	0.00699372	0.0785532
DSCAM	1430	0.000644271	0.00699372	0.0549106
DYNC1H1	1431	0.000645743	0.0070048	0.135255
AC011815.2	1432	0.000647189	0.00701558	0.0456874
TTLL3	1433	0.000651097	0.00705302	0.0498445
MYO19	1434	0.000654569	0.00708077	0.0586632
DDX39B	1435	0.000654571	0.00708077	0.109387
AC007384.1	1436	0.000656297	0.0070945	0.0757652
EZH1	1437	0.000656763	0.0070946	0.0727425
ZNF300	1438	0.000657729	0.00710009	0.0359109
KCNAB3	1439	0.000659416	0.00711335	0.0487962
PFKFB2	1440	0.000664237	0.00716038	0.0503793
AC009163.6	1441	0.000667724	0.00719297	0.0447561
DIAPH2	1442	0.000672464	0.00723901	0.114843
RBM7	1443	0.000678522	0.00729916	0.0514555
SLTM	1444	0.000680239	0.00731257	0.139944
MT-ND4L	1445	0.00068506	0.0073593	0.196438
SLC9A1	1446	0.000688364	0.00738968	0.0487686
TRIM72	1447	0.00068886	0.00738989	0.0583935
SMG1P4	1448	0.000691795	0.00741625	0.0435059
ARHGEF7	1449	0.000701049	0.00751027	0.0775317
SCAPER	1450	0.000701922	0.00751444	0.0823539
PRKRIP1	1451	0.00070388	0.00753021	0.0828082
AL353719.1	1452	0.000705259	0.00753726	0.0489545
UBA7	1453	0.00070551	0.00753726	0.107036
AC107375.1	1454	0.000710097	0.00758104	0.0468956
CABYR	1455	0.000713945	0.00761689	0.0408589
ERVK13-1	1456	0.000719989	0.00767609	0.0544024
TONSL	1457	0.000728433	0.00776079	0.044481
AL031848.2	1458	0.000745989	0.00794238	0.0435665
EXOG	1459	0.000748964	0.00796859	0.0490886
NAP1L5	1460	0.00075197	0.00799509	0.0545636
AL358472.5	1461	0.000755552	0.00802768	0.0483858
KDM2A	1462	0.000762834	0.00809453	0.113561
TOR1AIP1	1463	0.000762887	0.00809453	0.0872092
SEPSECS	1464	0.000765157	0.00810855	0.0480655
NUP58	1465	0.000765254	0.00810855	0.0914029
STAG3L3	1466	0.000768221	0.00813445	0.0480443
ZCCHC2	1467	0.000773056	0.00818006	0.0672053
AC093673.1	1468	0.000774523	0.00819	0.0761776
BRD9	1469	0.000778454	0.00822584	0.0911739
IRF8	1470	0.000779203	0.00822584	0.150333
TRAF6	1471	0.000779502	0.00822584	0.0691291
RBM23	1472	0.000780761	0.00823353	0.0856234
AGER	1473	0.000785061	0.00827325	0.0463582
AC104506.1	1474	0.000788888	0.00830795	0.058767
C19orf25	1475	0.000793898	0.00835504	0.0661943
TMPO-AS1	1476	0.000795447	0.00836567	0.0580042
ENC1	1477	0.00080234	0.00842821	0.0731965
AC005899.8	1478	0.000802636	0.00842821	0.0528334
EDC4	1479	0.000803023	0.00842821	0.0410526
NEFH	1480	0.000804629	0.00843937	0.056236
LACTB2	1481	0.000814668	0.00853889	0.0743682
AC022413.1	1482	0.000816038	0.00854747	0.0515286
RADX	1483	0.00081711	0.00855293	0.0391393
FAM72C	1484	0.000819381	0.00857093	0.0266037
AC133552.1	1485	0.000820741	0.00857936	0.05311
AC027373.1	1486	0.000824117	0.00860887	0.0416032
SPAG5-AS1	1487	0.000825282	0.00861199	0.0452195
HCAR3	1488	0.000825526	0.00861199	0.0589454
RPS2P55	1489	0.000828638	0.00863865	0.0197704
ZNF436-AS1	1490	0.000834325	0.00868851	0.02803
ADAT2	1491	0.000834541	0.00868851	0.06128
CACNA1D	1492	0.000837963	0.0087183	0.0636207
AC006160.1	1493	0.000841418	0.00874838	0.0512736
EFNB1	1494	0.000842487	0.00875363	0.0704622
ADRB1	1495	0.00085069	0.00883295	0.0576845
TBC1D2B	1496	0.000856773	0.00889016	0.0917448
AC120057.3	1497	0.000859151	0.00890514	0.0464801
EML4	1498	0.000859363	0.00890514	0.120579
RPL21P121	1499	0.000863218	0.00893911	0.0540108
ZNF451	1500	0.00086541	0.00895584	0.074151
AL358473.1	1501	0.000868841	0.00898536	0.0567896
ARHGAP26	1502	0.000871776	0.00900573	0.133608
MPDU1	1503	0.000871971	0.00900573	0.0643286
SCML1	1504	0.000875347	0.00903458	0.100383
EDRF1	1505	0.000879843	0.00907495	0.0687486
CHKB-DT	1506	0.000884353	0.00911541	0.0362169
ZNF638	1507	0.000891347	0.00918141	0.0936422
AKAP12	1508	0.000897871	0.00923825	0.0687787
CPB2-AS1	1509	0.000898471	0.00923825	0.043223
BX640514.2	1510	0.000898651	0.00923825	0.0476226
PER2	1511	0.000899962	0.0092456	0.0595194
IL6ST	1512	0.000901683	0.00925716	0.152908
AC118344.2	1513	0.000903351	0.00926815	0.024832
AC079630.1	1514	0.000909257	0.00932251	0.0421653
LAMA2	1515	0.00091027	0.00932251	0.0395475
ZNF397	1516	0.00091045	0.00932251	0.0576092
CYTH4	1517	0.000912009	0.00933231	0.103795
AC068620.1	1518	0.000917767	0.00938504	0.0426042
AC138207.9	1519	0.000924517	0.00944785	0.0463069
AC135050.3	1520	0.000936174	0.00956067	0.0653724
KTI12	1521	0.000941589	0.00960966	0.0323627
TRNAU1AP	1522	0.000944301	0.009631	0.0762296
ZNF207	1523	0.000959859	0.00978326	0.105626
THAP7-AS1	1524	0.000963159	0.00981045	0.0471789
EFNB2	1525	0.000968968	0.00986314	0.0670267
ZSWIM6	1526	0.000969652	0.00986364	0.124009
AL359513.1	1527	0.000974898	0.00990893	0.0489618
RF00017_ENSG00000275460	1528	0.000975381	0.00990893	0.0336313
AL669831.5	1529	0.000976365	0.00990996	0.0334993
AP4B1	1530	0.00097676	0.00990996	0.0453308
AC012651.1	1531	0.000980641	0.00994284	0.0284892
ATP1B1	1532	0.000992876	0.0100603	0.148088
CIITA	1533	0.000994218	0.0100673	0.0659023
KCNQ3	1534	0.000998025	0.0100993	0.081547
PYGM	1535	0.00100066	0.0101193	0.0374356
DCAF5	1536	0.00100277	0.0101341	0.0709276
AMT	1537	0.00101229	0.0102209	0.0317496
SHPRH	1538	0.00101268	0.0102209	0.0744745
AL031963.3	1539	0.00101789	0.0102669	0.050357
IST1	1540	0.00102029	0.0102844	0.0989688
RBM14	1541	0.00103216	0.0103967	0.0425576
TLE3	1542	0.00103277	0.0103967	0.0951098
MCOLN1	1543	0.00103429	0.0104053	0.0859557
MACF1	1544	0.00104646	0.0105208	0.123666
AL691403.2	1545	0.00105168	0.0105545	0.0364092
SSC5D	1546	0.00105198	0.0105545	0.0457054
SNHG19	1547	0.00105219	0.0105545	0.0607596
RGMB	1548	0.00105253	0.0105545	0.041228
AC092069.1	1549	0.00105411	0.0105635	0.0564844
JAG1	1550	0.00107894	0.0108054	0.0555891
KIAA2026	1551	0.00108385	0.0108446	0.0966972
UTP3	1552	0.00108451	0.0108446	0.0869564
AGAP4	1553	0.00108495	0.0108446	0.0452434
RALGAPA1	1554	0.00109472	0.0109352	0.0886688
WDR60	1555	0.00109689	0.0109498	0.0734373
HECTD1	1556	0.00110073	0.0109811	0.0958022
HMGN3-AS1	1557	0.00110486	0.0110152	0.0428793
ADAP2	1558	0.00110977	0.0110571	0.158862
MED12L	1559	0.00111475	0.0110996	0.059239
NUP153	1560	0.00111818	0.0111238	0.0728736
LINC02175	1561	0.00111861	0.0111238	0.0314146
EXOC1	1562	0.00112631	0.0111931	0.0817721
STAG3L5P	1563	0.00112951	0.0112178	0.0360876
EXOC3-AS1	1564	0.0011328	0.0112433	0.0597885
FBRSL1	1565	0.00113382	0.0112462	0.0715164
ATP8B4	1566	0.00114045	0.0113048	0.0868158
AL365272.1	1567	0.0011457	0.0113464	0.0619832
HIST1H1A	1568	0.00114611	0.0113464	0.065722
TRAPPC2B	1569	0.00115595	0.0114315	0.0554707
ERICH6-AS1	1570	0.00115619	0.0114315	0.0305826
ARMC5	1571	0.00115778	0.01144	0.0494981
ZNF493	1572	0.00115966	0.0114513	0.0453891
AC112220.2	1573	0.00116092	0.0114565	0.0429109
AHCTF1	1574	0.00116408	0.0114803	0.0706779
AC008770.4	1575	0.00117065	0.0115378	0.0386485
CUTALP	1576	0.00117324	0.011556	0.0494929
NKIRAS1	1577	0.00117927	0.011608	0.0539725
COG5	1578	0.00118507	0.0116577	0.0692041
AL078644.2	1579	0.00119401	0.0117382	0.0374046
NUTM2B-AS1	1580	0.00121176	0.0119052	0.0704283
AC019129.2	1581	0.00121803	0.0119592	0.0329347
ADAMTS10	1582	0.00122024	0.0119733	0.0541942
EHBP1	1583	0.00122167	0.0119798	0.0563109
TSPAN31	1584	0.00122405	0.0119894	0.0875701
NAMPT	1585	0.00122419	0.0119894	0.181414
AC018892.3	1586	0.00123382	0.012076	0.0422208
IL6R-AS1	1587	0.0012357	0.0120868	0.0827842
IGHMBP2	1588	0.00123779	0.0120983	0.0452155
NFIA	1589	0.00123843	0.0120983	0.0875937
NRDE2	1590	0.00124247	0.0121301	0.0679771
ATG2A	1591	0.00125084	0.0122041	0.0462197
TVP23B	1592	0.00127019	0.0123852	0.0531775
ZNF621	1593	0.0012718	0.0123931	0.0497235
AC037487.2	1594	0.00128251	0.0124896	0.0612139
IDI2-AS1	1595	0.00128434	0.0124995	0.0486315
HCAR2	1596	0.00128672	0.0125149	0.0733806
AC108488.3	1597	0.00129285	0.0125666	0.0412227
LINC02256	1598	0.00129587	0.0125881	0.0395825
HSPA4L	1599	0.00130068	0.012627	0.0434213
AC016831.7	1600	0.00130183	0.0126302	0.0481127
PCNX4	1601	0.00131098	0.012711	0.0651445
KCND3	1602	0.00131202	0.0127131	0.0335395
RAD51-AS1	1603	0.00131311	0.0127158	0.047235
AC069544.1	1604	0.00131559	0.0127318	0.0502906
AC006141.1	1605	0.00134732	0.0130295	0.034795
COLEC12	1606	0.00134802	0.0130295	0.0531801
ZNF276	1607	0.00135213	0.0130611	0.0748139
HIST1H4F	1608	0.00136003	0.0131292	0.0384316
PELO	1609	0.00136759	0.013194	0.0370386
PIK3R3	1610	0.00137083	0.013217	0.0420876
GNAL	1611	0.00138281	0.0133243	0.0403622
AC124242.1	1612	0.00138374	0.013325	0.0306519
AC048341.2	1613	0.00138983	0.0133753	0.0248733
EML3	1614	0.00139698	0.0134357	0.0481352
GON4L	1615	0.00140478	0.0135024	0.0981212
WHAMMP3	1616	0.00140779	0.0135229	0.0396478
AC016575.1	1617	0.00142726	0.0136954	0.044464
BANP	1618	0.0014275	0.0136954	0.0549922
WDR73	1619	0.00142992	0.0137101	0.0647433
PRR14	1620	0.00143085	0.0137106	0.0594086
NFAT5	1621	0.00143707	0.0137616	0.0920169
MRNIP	1622	0.00145237	0.0138996	0.0464613
DRAIC	1623	0.00145985	0.0139626	0.0297303
AP000787.1	1624	0.00146183	0.0139729	0.0453267
URB2	1625	0.00146645	0.0140084	0.0410795
RBBP5	1626	0.001471	0.0140433	0.062738
SGSH	1627	0.00147425	0.0140657	0.0342891
POMZP3	1628	0.00147942	0.0141063	0.0548636
NRARP	1629	0.00149567	0.0142525	0.138362
AC022098.4	1630	0.00151528	0.0144305	0.0435317
KLHL9	1631	0.00152157	0.0144815	0.0698842
P4HA1	1632	0.0015325	0.0145766	0.118878
AUTS2	1633	0.0015538	0.0147702	0.0628555
AC008771.1	1634	0.00156826	0.0148984	0.0728725
AC005253.1	1635	0.0015711	0.0149164	0.048864
AC009119.1	1636	0.00158886	0.0150757	0.0525119
PACS2	1637	0.00160223	0.0151933	0.0723409
SMG6	1638	0.00160922	0.0152503	0.0851815
AP003108.2	1639	0.00161261	0.0152731	0.0308549
MED13	1640	0.00161391	0.0152761	0.0967024
NHLRC3	1641	0.00161788	0.0153043	0.08308
GATD3A	1642	0.00162208	0.0153347	0.0460803
BX088651.4	1643	0.00162842	0.0153853	0.0298548
SESN1	1644	0.00163253	0.0154147	0.089943
ZNF528-AS1	1645	0.00163847	0.0154614	0.0466699
AC026461.3	1646	0.0016474	0.0155362	0.0445209
YY1AP1	1647	0.00165332	0.0155826	0.0489724
MTRF1L	1648	0.00166165	0.0156516	0.0610284
ENO1-AS1	1649	0.00166353	0.0156598	0.0396116
BAZ2B	1650	0.00166515	0.0156655	0.118526
ETFBKMT	1651	0.00166624	0.0156663	0.0360041
AC024909.1	1652	0.00166901	0.0156828	0.0400569
TRIM39	1653	0.00168152	0.0157908	0.0336044
CCNE2	1654	0.00168579	0.0158213	0.0429411
C19orf54	1655	0.0016894	0.0158442	0.0329557
ZNF326	1656	0.00169026	0.0158442	0.0961193
AGO1	1657	0.00169682	0.015896	0.0759289
AC022400.3	1658	0.00170122	0.0159235	0.0383558
CCDC18-AS1	1659	0.0017018	0.0159235	0.0716969
LPAR2	1660	0.00170446	0.0159388	0.0549471
NCOR1	1661	0.00171215	0.016001	0.112276
RPS6KA5	1662	0.00171417	0.0160103	0.0655939
GCN1	1663	0.00171832	0.0160394	0.0431603
ARPC4-TTLL3	1664	0.00173011	0.0161397	0.032794
LENG8	1665	0.00173428	0.0161689	0.0976696
AL022328.3	1666	0.001745	0.016259	0.0470448
WASH2P	1667	0.00175256	0.0163197	0.053316
AC022210.1	1668	0.00175407	0.0163233	0.0373616
AC100812.1	1669	0.00175504	0.0163233	0.0337794
FNBP1P1	1670	0.0017754	0.0164967	0.04184
TCTN3	1671	0.00177633	0.0164967	0.072509
CCNYL1	1672	0.00177688	0.0164967	0.044403
AC079921.1	1673	0.00177992	0.016515	0.0470422
RN7SL301P	1674	0.00179064	0.0166046	0.0452807
AC004151.1	1675	0.00180326	0.0167116	0.103691
AC005082.1	1676	0.00180474	0.0167117	0.0578911
AC005280.1	1677	0.00180542	0.0167117	0.0450461
CPSF1	1678	0.00181555	0.0167926	0.0534518
DOCK7	1679	0.00181743	0.0167926	0.0509467
LRRFIP1P1	1680	0.00181832	0.0167926	0.040814
HIST1H2AB	1681	0.00181849	0.0167926	0.043508
NOP56	1682	0.00182758	0.0168647	0.0979766
LRRK2	1683	0.00182846	0.0168647	0.0705607
MICU3	1684	0.00184756	0.0170306	0.105008
AL590326.1	1685	0.0018544	0.0170836	0.0585294
MROH1	1686	0.00186337	0.017147	0.0528335
PAN3-AS1	1687	0.00186349	0.017147	0.0429414
AC010883.3	1688	0.00186867	0.0171844	0.0559255
BCL10	1689	0.00186997	0.0171862	0.0941962
USP32P1	1690	0.00188151	0.0172821	0.0210024
FNBP4	1691	0.001884	0.0172947	0.120269
CCDC15-DT	1692	0.00189738	0.0174073	0.0277484
TBCD	1693	0.00190109	0.0174309	0.0506149
CPT1B	1694	0.00190882	0.0174915	0.0339933
KLHL18	1695	0.00191116	0.0175026	0.0809325
CCDC130	1696	0.00191516	0.0175213	0.0905246
CREBBP	1697	0.00191545	0.0175213	0.082968
MAP2K3	1698	0.00191949	0.0175478	0.137169
AP003392.6	1699	0.00193813	0.0177078	0.0405483
IDUA	1700	0.00195268	0.0178303	0.050123
ZNF711	1701	0.00196169	0.017902	0.0459658
TBCCD1	1702	0.00198276	0.0180825	0.0403508
APOLD1	1703	0.0019838	0.0180825	0.062277
SLC44A4	1704	0.00199959	0.0182158	0.0380442
ANKRD26	1705	0.00201175	0.0183158	0.0727228
AC009126.1	1706	0.00202644	0.0184387	0.0360336
PINLYP	1707	0.00203243	0.0184824	0.0363365
RPL13AP6	1708	0.00205843	0.0187078	0.0589827
PRRC2B	1709	0.00206722	0.0187767	0.0977333
EFCAB13	1710	0.00207763	0.018856	0.0470662
SRSF12	1711	0.00207837	0.018856	0.0411606
STS	1712	0.00209577	0.0190027	0.0227987
AC073861.1	1713	0.00209916	0.0190223	0.034953
TMEM116	1714	0.00213068	0.0192967	0.0320071
TNFSF14	1715	0.00216254	0.0195682	0.05137
AL513550.1	1716	0.00216334	0.0195682	0.0331355
USP8	1717	0.00216562	0.0195682	0.119616
ANKRD12	1718	0.0021657	0.0195682	0.148057
DEF6	1719	0.00217785	0.0196665	0.0881907
PRPF8	1720	0.00219328	0.0197943	0.0790131
NEMF	1721	0.0022136	0.0199662	0.10471
NBPF12	1722	0.00221742	0.019989	0.0332972
AC006157.1	1723	0.00222486	0.0200444	0.0334565
DNM1L	1724	0.00222688	0.0200509	0.0895089
APBB3	1725	0.00223281	0.0200927	0.04641
MYO7A	1726	0.00223595	0.0200982	0.0599081
AL392172.2	1727	0.00223625	0.0200982	0.065684
ULBP2	1728	0.00223731	0.0200982	0.0421389
HERC1	1729	0.00225327	0.0202299	0.07752
MSL1	1730	0.00226468	0.0203206	0.067758
SNRPGP5	1731	0.00227034	0.0203596	0.027047
AC093677.2	1732	0.00227165	0.0203596	0.045288
SMG1P5	1733	0.00227623	0.0203889	0.0382132
XIRP1	1734	0.0022915	0.0205138	0.062364
ZNF92	1735	0.00229864	0.0205659	0.0688115
AC008115.3	1736	0.00230154	0.02058	0.0277851
PIEZO1	1737	0.00231323	0.0206626	0.0745049
TATDN2	1738	0.00231344	0.0206626	0.0505705
KBTBD8	1739	0.00232203	0.0207274	0.0674917
AL117335.1	1740	0.00233486	0.0208299	0.0520527
CWF19L2	1741	0.00234011	0.0208612	0.0891698
LINC01473	1742	0.00234113	0.0208612	0.0449289
AF129075.3	1743	0.0023424	0.0208612	0.0279681
CROCC	1744	0.00234427	0.0208658	0.0466631
AC145124.1	1745	0.00234929	0.0208943	0.0375046
BCL6	1746	0.00235016	0.0208943	0.0862809
CHTF18	1747	0.00236145	0.0209827	0.0350382
ZMAT3	1748	0.00237581	0.0210982	0.0585729
ZNF622	1749	0.00237913	0.0211156	0.0744085
EIF2AK3	1750	0.00238477	0.0211469	0.06787
CARF	1751	0.00238538	0.0211469	0.0455072
AC025259.3	1752	0.00240489	0.0213077	0.0423273
AC004477.1	1753	0.00240742	0.0213179	0.0351043
UBA6	1754	0.00242362	0.0214461	0.0771061
IVNS1ABP	1755	0.00242465	0.0214461	0.116135
ZNF839	1756	0.00243544	0.0215293	0.0343644
ZCCHC12	1757	0.00243849	0.0215439	0.05531
REL	1758	0.00244029	0.0215476	0.230416
ATP9B	1759	0.00245019	0.0216227	0.0582965
NADSYN1	1760	0.0024545	0.0216484	0.0528258
LINC00265	1761	0.00245649	0.0216536	0.0382193
NAIP	1762	0.00246823	0.0217448	0.0832443
SNHG25	1763	0.00247333	0.0217774	0.0332507
KMT2D	1764	0.00249276	0.021936	0.0618405
AC006486.2	1765	0.00249859	0.0219748	0.038803
ARID1A	1766	0.00250509	0.0220196	0.0867147
AC018521.1	1767	0.00252836	0.0222115	0.0504366
BCAS1	1768	0.0025356	0.0222625	0.0333212
YWHAG	1769	0.00253711	0.0222631	0.0955384
EIF3A	1770	0.0025558	0.0224145	0.114946
AC009831.1	1771	0.00256769	0.022506	0.0412906
HMG20A	1772	0.00259984	0.022775	0.0645377
STK24-AS1	1773	0.00262486	0.0229768	0.0337233
ARHGEF11	1774	0.00262584	0.0229768	0.0890793
COA7	1775	0.00263217	0.0230076	0.0372465
PSD	1776	0.00263232	0.0230076	0.0286256
KDM5D	1777	0.00264431	0.0230994	0.049188
ZNF407	1778	0.00266059	0.0232286	0.0560866
ZNF763	1779	0.00268459	0.0234249	0.033516
ITSN2	1780	0.0026899	0.0234454	0.0968367
MYCBP2	1781	0.0026908	0.0234454	0.12494
ZRSR2P1	1782	0.00269147	0.0234454	0.0244902
AL591684.2	1783	0.00269651	0.0234738	0.0233944
ARIH1	1784	0.00269775	0.0234738	0.0940864
PRKAG2	1785	0.0027008	0.0234872	0.126998
CAPN3	1786	0.00270576	0.0235171	0.0275046
SNHG26	1787	0.00270756	0.0235196	0.0193507
AC022211.2	1788	0.0027177	0.0235945	0.0294509
PCYOX1	1789	0.00272206	0.0236191	0.0465457
LMBR1L	1790	0.00272626	0.0236423	0.0473227
MAFG	1791	0.00275483	0.0238768	0.106319
CRISPLD2	1792	0.00276828	0.0239799	0.0243187
SUPT7L	1793	0.00278652	0.0241086	0.0620702
AC091978.1	1794	0.00278779	0.0241086	0.0333932
PPP5D1	1795	0.0027878	0.0241086	0.0323799
NRDC	1796	0.00278972	0.0241118	0.109101
PATL1	1797	0.00280302	0.0242133	0.0639369
RBM33	1798	0.00280758	0.0242392	0.0850149
AC133550.2	1799	0.00283939	0.0245002	0.043857
ARMH4	1800	0.00284318	0.0245161	0.0426703
FAM72A	1801	0.00284439	0.0245161	0.0527503
NXT1	1802	0.00284907	0.0245428	0.0815459
LINC00843	1803	0.00285251	0.0245588	0.0357467
SPSB2	1804	0.00285567	0.0245724	0.0472835
AL031282.2	1805	0.00288998	0.0248539	0.0540882
AP000346.2	1806	0.0029063	0.0249803	0.0211135
NKIRAS2	1807	0.00290827	0.0249835	0.0656021
AC098614.3	1808	0.00291079	0.0249912	0.0679014
AC008695.1	1809	0.00291274	0.0249942	0.0480602
HELB	1810	0.00294798	0.0252826	0.0419396
BMP2K	1811	0.00296323	0.0253994	0.12854
CTC1	1812	0.0029689	0.0254339	0.028791
FOXJ2	1813	0.00297305	0.0254554	0.0468813
FHOD1	1814	0.00301696	0.0258172	0.0696074
MTA1	1815	0.00301922	0.0258222	0.0669345
LRCH4	1816	0.00303519	0.0259445	0.0497236
FAM157C	1817	0.00303892	0.0259612	0.0314388
ATRX	1818	0.00304049	0.0259612	0.130759
MMACHC	1819	0.00306226	0.0261327	0.0336181
AC097382.3	1820	0.0030747	0.0262245	0.0366861
ZNF335	1821	0.00310595	0.0264765	0.0517341
AC023908.3	1822	0.00311447	0.0265345	0.0322823
EIF2B5	1823	0.00312343	0.0265963	0.0585119
OGT	1824	0.00312636	0.0266066	0.0879899
AC012360.1	1825	0.00313273	0.0266462	0.0367559
AL031733.2	1826	0.00313493	0.0266503	0.0323099
DLX2	1827	0.00314829	0.0267492	0.0357506
RNF19B	1828	0.00315261	0.0267713	0.0713768
ZNF783	1829	0.00319075	0.0270804	0.0298036
LINC00173	1830	0.00319392	0.0270924	0.0250698
GTF2IRD2	1831	0.00321469	0.0272527	0.0462686
TIMM23B	1832	0.00321632	0.0272527	0.0361105
AL157394.2	1833	0.00323751	0.0274173	0.0317935
AC022107.1	1834	0.00324201	0.0274353	0.0418278
MAP3K10	1835	0.00324325	0.0274353	0.0331227
TSNAX-DISC1	1836	0.00324495	0.0274353	0.0419688
POGZ	1837	0.00324703	0.027438	0.0817674
RN7SKP71	1838	0.00324891	0.027439	0.026795
IFFO1	1839	0.00328122	0.0276968	0.0752488
MBD5	1840	0.00328352	0.0277011	0.04225
ZNF609	1841	0.00329435	0.0277774	0.0639271
LENG9	1842	0.00329645	0.02778	0.0577303
PMS1	1843	0.00330375	0.0278114	0.0660502
AC138207.8	1844	0.00330376	0.0278114	0.0426401
ARAP1	1845	0.00331092	0.0278566	0.0872886
BTBD7	1846	0.00331295	0.0278585	0.0676551
PLAT	1847	0.00331528	0.027863	0.0511554
DIS3	1848	0.00333653	0.0280265	0.0660108
GATAD2B	1849	0.00334614	0.028092	0.0513089
AC093627.5	1850	0.00335403	0.028143	0.0280488
MHENCR	1851	0.00335698	0.0281525	0.0381904
FAAP24	1852	0.00338418	0.0283653	0.0352384
PNP	1853	0.00338624	0.0283673	0.0947571
SIN3B	1854	0.00339727	0.0284443	0.0594563
PREPL	1855	0.00340783	0.0285174	0.038923
AC006449.6	1856	0.00342369	0.0286214	0.0621647
HDGFL3	1857	0.00342478	0.0286214	0.0295507
TAF6L	1858	0.0034258	0.0286214	0.0414796
MED17	1859	0.00343533	0.0286856	0.042052
LINC02422	1860	0.00343847	0.0286965	0.0295842
ASNS	1861	0.00345493	0.028803	0.0190391
DDX20	1862	0.00345495	0.028803	0.0428411
HIST1H3H	1863	0.0034589	0.0288205	0.040943
HEATR5B	1864	0.0034715	0.0289099	0.0557679
WDFY2	1865	0.00348864	0.0290371	0.0788041
CCL4	1866	0.00349061	0.0290379	0.405935
IQCN	1867	0.00350107	0.0291093	0.0426372
TACC1	1868	0.00350626	0.0291368	0.11422
TOE1	1869	0.0035155	0.02919	0.042756
LINC01126	1870	0.00351747	0.02919	0.0438731
EIF4G3	1871	0.0035183	0.02919	0.0803929
AC005520.2	1872	0.00352197	0.0292002	0.0350378
AC092821.3	1873	0.00352328	0.0292002	0.0443825
CTNND1	1874	0.00352647	0.029211	0.0597654
SLC6A8	1875	0.00352938	0.0292195	0.0375931
LETM2	1876	0.0035322	0.0292273	0.0260222
AC025048.6	1877	0.00356373	0.0294725	0.0346211
PPARD	1878	0.00356724	0.0294857	0.0731083
ZKSCAN2-DT	1879	0.00359193	0.029674	0.0479099
FTX	1880	0.00359955	0.0297212	0.0517624
JMJD1C-AS1	1881	0.00360371	0.0297251	0.039154
NBPF20	1882	0.00360386	0.0297251	0.0516497
NSUN3	1883	0.00362543	0.0298817	0.0457659
CNTRL	1884	0.0036267	0.0298817	0.0908386
TLR1	1885	0.00363456	0.0299307	0.0671141
AC015982.1	1886	0.00364251	0.0299802	0.0244122
AC064807.1	1887	0.00365064	0.0300312	0.0338239
LINC00278	1888	0.00365484	0.0300494	0.0387812
LINC00342	1889	0.00365672	0.0300494	0.0412257
TRIM4	1890	0.00365992	0.0300598	0.0518592
LMBRD1	1891	0.00366609	0.0300895	0.0762601
PRKY	1892	0.00366742	0.0300895	0.0412697
ATP5MFP6	1893	0.00367801	0.0301605	0.0357817
RB1-DT	1894	0.00368518	0.0302033	0.0237963
SGSM2	1895	0.0037007	0.0303145	0.0487201
CMYA5	1896	0.0037132	0.0304009	0.0334076
H3F3AP2	1897	0.00372656	0.0304941	0.0367425
DEPDC5	1898	0.00375828	0.0307375	0.0303054
AC007881.3	1899	0.00376246	0.0307555	0.0395957
PIGG	1900	0.00376818	0.030786	0.0485883
PDIA3P1	1901	0.00379846	0.0310171	0.0351127
PHF7	1902	0.00382067	0.0311821	0.0342798
AC000068.1	1903	0.00383142	0.0312458	0.0336463
CCDC157	1904	0.00383251	0.0312458	0.0249134
CCDC7	1905	0.00384642	0.0313376	0.0481868
LINC01011	1906	0.0038478	0.0313376	0.0186965
MAPK10	1907	0.003859	0.0314123	0.0356366
IER3-AS1	1908	0.00386289	0.0314275	0.0455198
DNAH1	1909	0.00386873	0.0314585	0.0349589
AC092053.2	1910	0.0038772	0.0315109	0.0242592
SLC3A2	1911	0.00389086	0.0316054	0.129302
NFIC	1912	0.00389516	0.0316237	0.123952
LINC00472	1913	0.00390413	0.03168	0.0398245
SERPINB9P1	1914	0.00391318	0.0317368	0.055495
MYSM1	1915	0.00391988	0.0317746	0.0675224
AC006064.2	1916	0.0039288	0.0318303	0.0298344
AP5B1	1917	0.00393354	0.031852	0.0692948
FAM193B	1918	0.0039402	0.0318893	0.0510263
LRRC8C-DT	1919	0.00394889	0.031943	0.044008
FAM122C	1920	0.00396365	0.0320457	0.0315676
CKMT2-AS1	1921	0.00397524	0.0321227	0.032376
ETV1	1922	0.00398199	0.0321605	0.0223268
Z82244.2	1923	0.00399785	0.0322717	0.0547271
PAN2	1924	0.0040168	0.0324079	0.041683
LRMP	1925	0.00407369	0.0328498	0.0752662
RAD9A	1926	0.00408856	0.032945	0.0451179
SMURF2	1927	0.00408974	0.032945	0.0813551
AC002451.1	1928	0.00411868	0.033146	0.0433595
ADGRF3	1929	0.00411896	0.033146	0.030501
INTS6L	1930	0.00412887	0.0332085	0.0484435
ZNF674-AS1	1931	0.00413927	0.0332749	0.034791
AL356441.1	1932	0.00417001	0.0335047	0.0313466
SSH1	1933	0.00417951	0.0335637	0.0756076
MAFK	1934	0.00419508	0.0336624	0.0482216
WWC2-AS2	1935	0.00419614	0.0336624	0.0372717
C18orf32	1936	0.00420004	0.0336763	0.067795
NAA40	1937	0.00422187	0.0338262	0.0600765
ANK1	1938	0.0042231	0.0338262	0.0293457
EIF1B	1939	0.00425607	0.0340727	0.128957
AC243829.1	1940	0.004298	0.0343906	0.030157
OMG	1941	0.00433317	0.0346437	0.0204572
GSK3B	1942	0.00433408	0.0346437	0.0736768
CECR2	1943	0.00434292	0.0346965	0.0563798
GEMIN7-AS1	1944	0.00436076	0.034821	0.0411582
TTC30A	1945	0.00436743	0.0348563	0.0282619
ZMYM3	1946	0.00437397	0.0348906	0.0433455
AL137918.1	1947	0.004415	0.0351998	0.0513121
NRG2	1948	0.00445203	0.0354629	0.0343421
ELP1	1949	0.00445257	0.0354629	0.0354222
WHAMM	1950	0.00447097	0.0355912	0.0633184
HSPA7	1951	0.00448755	0.0357049	0.051688
SZT2	1952	0.00452606	0.0359741	0.0392696
AC016727.1	1953	0.00452713	0.0359741	0.0165484
TSC2	1954	0.00452834	0.0359741	0.0502335
BCLAF3	1955	0.00454353	0.0360763	0.0446325
LRSAM1	1956	0.00454949	0.0361052	0.0402352
UBQLN2	1957	0.00456828	0.0362358	0.0590338
TBC1D12	1958	0.00460068	0.0364741	0.0836223
LTN1	1959	0.00460563	0.036488	0.0615468
BHLHE41	1960	0.00460714	0.036488	0.18008
PLEKHM1P1	1961	0.00461794	0.036555	0.0489061
TSEN34	1962	0.00462313	0.0365774	0.05403
SLC9A3-AS1	1963	0.00464787	0.0367544	0.0270762
ZNF717	1964	0.0046965	0.03712	0.0308398
SFI1	1965	0.00470236	0.0371474	0.0294755
DDX21	1966	0.00471167	0.037202	0.144392
AC004980.1	1967	0.0047402	0.0374083	0.0440374
AC040162.3	1968	0.00475264	0.0374874	0.0282666
NSD3	1969	0.00477915	0.0376774	0.109306
UHRF2	1970	0.00480196	0.037838	0.0517763
ODC1-DT	1971	0.00481436	0.0379165	0.0257363
STAM-AS1	1972	0.00482394	0.0379726	0.0457415
CHD6	1973	0.00484487	0.0381181	0.0857307
AC011468.5	1974	0.00487469	0.0383332	0.0234537
FGD4	1975	0.0048888	0.0384248	0.129596
ZMYM6	1976	0.00491322	0.0385971	0.041783
WASH8P	1977	0.00491838	0.0386181	0.0406226
ING5	1978	0.00493234	0.0387082	0.0603178
AC002467.1	1979	0.00493996	0.0387413	0.0347243
RPL9P7	1980	0.00494156	0.0387413	0.0177819
LINC01116	1981	0.00494868	0.0387776	0.0132846
SHC1	1982	0.00498106	0.0390116	0.0327742
BCL2A1	1983	0.00503123	0.0393847	0.198306
AC007191.1	1984	0.00503479	0.0393927	0.020434
FAM126A	1985	0.00504372	0.0394377	0.051879
MNT	1986	0.00504562	0.0394377	0.04354
PYROXD1	1987	0.00505059	0.0394435	0.0468318
TRPM2	1988	0.00505384	0.0394435	0.0806401
U2AF2	1989	0.0050547	0.0394435	0.0701087
EXT1	1990	0.00505653	0.0394435	0.0415087
SLX1B-SULT1A4	1991	0.00506284	0.0394729	0.0274825
MGA	1992	0.00507866	0.0395763	0.056003
AC060780.1	1993	0.00509001	0.0396448	0.0212655
ZNF689	1994	0.00512531	0.0398998	0.0359985
AC104590.1	1995	0.00514827	0.0400584	0.0295911
MORC2	1996	0.005151	0.0400596	0.0531785
KMT2E	1997	0.00515574	0.0400764	0.125369
FZD1	1998	0.00516125	0.0400992	0.0639041
[truncated: 5,555 more rows]

## Sheet: MG_2
Differentially expressed Genes in MG_2 cluster vs. MG_1 cluster
Gene ID	Top	p.value	FDR	summary.logFC
RPS3A	1	0	6.99102888865364e-321	2.63791
RPS4X	2	4.34714e-287	3.37403e-283	2.59271
RPL26	3	9.93423e-287	5.1403e-283	3.0154
RPL7A	4	3.82334e-285	1.48374e-281	2.54401
RPS14	5	6.27919e-271	1.94944e-267	2.8564
RPL30	6	1.198e-270	3.09942e-267	2.8775
RPS10	7	1.59702e-270	3.54151e-267	2.04463
UBA52	8	3.80753e-268	7.38804e-265	2.26099
RPS13	9	1.03265e-267	1.78109e-264	2.57416
RPL27	10	1.28469e-267	1.99423e-264	1.86892
RPS27A	11	1.77438e-267	2.50397e-264	2.67625
RPS15	12	1.23192e-263	1.59359e-260	2.67467
RPS3	13	2.84208e-262	3.39366e-259	2.35536
AIF1	14	6.69947e-262	7.42828e-259	2.3767
RPS18	15	5.85155e-256	6.05557e-253	2.86959
RPL8	16	4.75494e-254	4.61319e-251	2.10439
RPL11	17	1.41787e-251	1.29468e-248	2.77768
C1QB	18	2.58841e-250	2.23222e-247	2.67017
RPL35A	19	3.84785e-246	3.14369e-243	2.3234
RPL23A	20	7.31984e-245	5.6813e-242	2.21862
RPL13A	21	8.23688e-245	6.08862e-242	1.98396
RPL22	22	1.48316e-242	1.0465e-239	1.97528
RPL37A	23	1.31931e-239	8.90421e-237	2.53774
RPS12	24	2.99088e-228	1.93448e-225	2.90604
RPS21	25	7.33587e-228	4.55499e-225	2.48856
RPL28	26	6.96689e-226	4.1595e-223	2.72045
RPS5	27	1.20536e-225	6.9299e-223	1.5008
RPS8	28	5.57236e-223	3.08928e-220	2.76375
C1QA	29	1.49779e-221	8.01733e-219	2.5459
RPS7	30	9.44225e-219	4.88573e-216	2.22171
RPL21	31	8.71836e-216	4.36565e-213	1.95441
AC004086.1	32	1.63478e-214	7.9302e-212	2.04039
ATP5F1E	33	1.44889e-213	6.81549e-211	2.20557
RPL18	34	5.31628e-213	2.4272e-210	2.24866
RPS25	35	6.10744e-212	2.70874e-209	2.35209
RPS24	36	3.62916e-211	1.56487e-208	2.84804
RPS23	37	4.57659e-211	1.92006e-208	2.92872
RPL19	38	1.52736e-210	6.23925e-208	2.51297
RPS6	39	2.34214e-210	9.32232e-208	2.17368
ATP5MC2	40	3.25025e-210	1.26134e-207	1.35895
ITM2B	41	8.13149e-209	3.07866e-206	2.28172
C1QC	42	1.21748e-207	4.49975e-205	2.31872
RPS11	43	4.83293e-207	1.74469e-204	2.09845
TYROBP	44	4.59486e-205	1.62104e-202	2.26278
RPL29	45	9.60374e-204	3.31286e-201	2.45634
ARPC3	46	3.41891e-203	1.15373e-200	1.4081
RPS19	47	4.09901e-203	1.35381e-200	2.92623
RPL10	48	9.19686e-200	2.97423e-197	2.56553
RPL32	49	1.3239e-199	4.19407e-197	2.72697
CYBA	50	3.84333e-199	1.1932e-196	2.02694
RPS28	51	4.76385e-199	1.44998e-196	2.58844
COX4I1	52	2.02883e-198	6.05644e-196	1.38177
RPS29	53	3.3893e-198	9.9268e-196	2.14609
NME1-NME2	54	1.6509e-197	4.74572e-195	1.08846
NME2	55	5.25147e-196	1.48216e-193	1.08821
RPL10A	56	6.8237e-194	1.89151e-191	1.65555
RPL27A	57	2.05617e-193	5.59965e-191	1.81705
NPC2	58	7.93815e-190	2.12455e-187	1.39159
RPS15A	59	1.2656e-189	3.32981e-187	2.47375
CD81	60	2.15254e-189	5.56899e-187	1.74573
NACA	61	2.33177e-189	5.93379e-187	2.1542
RPL18A	62	1.14224e-188	2.85984e-186	1.68273
RPL35	63	3.61645e-188	8.91081e-186	2.0318
RPL5	64	1.93557e-187	4.69466e-185	1.69666
RACK1	65	3.22806e-186	7.70911e-184	1.53329
TOMM7	66	4.67159e-186	1.09874e-183	1.35452
RPL13	67	1.98716e-185	4.60397e-183	2.62935
COX7C	68	5.12773e-185	1.17056e-182	1.61262
FCER1G	69	2.86202e-184	6.43872e-182	1.55217
HLA-DPA1	70	2.67217e-182	5.92572e-180	2.04667
CD63	71	1.08271e-181	2.36717e-179	1.6104
RPL17-C18orf32	72	9.81345e-180	2.11575e-177	1.54585
RPL36	73	1.20091e-179	2.55366e-177	2.36412
RPS2	74	1.03574e-177	2.17268e-175	2.14721
ATP5MG	75	5.62745e-177	1.16473e-174	1.30798
OAZ1	76	7.82515e-177	1.59829e-174	1.54805
B2M	77	1.53398e-176	3.09247e-174	2.3254
RPL34	78	1.40482e-174	2.79577e-172	2.64003
UQCR11	79	3.05953e-174	6.01178e-172	1.16415
PFDN5	80	3.98752e-174	7.73729e-172	1.62498
CST3	81	6.17332e-173	1.18307e-170	1.86313
RPL14	82	5.79529e-172	1.09708e-169	1.99516
RPLP1	83	1.07858e-171	2.01721e-169	2.61597
RPL15	84	5.76309e-169	1.06501e-166	1.48929
GABARAP	85	1.03566e-167	1.89136e-165	1.15793
RPS27	86	1.52106e-167	2.74552e-165	2.25652
RPS9	87	3.76711e-166	6.72147e-164	1.74384
OST4	88	3.13447e-165	5.52914e-163	1.25883
FAU	89	7.35096e-165	1.28212e-162	2.13856
RPL3	90	2.39398e-162	4.12908e-160	1.8098
PFN1	91	8.24411e-162	1.4063e-159	1.45634
COMMD6	92	3.2574e-160	5.49616e-158	1.05004
RPLP2	93	4.93698e-160	8.24051e-158	2.31253
RPL41	94	6.25046e-157	1.03219e-154	2.21566
TSPO	95	2.10558e-155	3.44051e-153	0.993626
EEF1G	96	3.89822e-155	6.30334e-153	0.795096
MYL6	97	4.17787e-155	6.68588e-153	1.53876
ATP6V0E1	98	1.23892e-154	1.96243e-152	1.22267
S100A11	99	1.90088e-153	2.98054e-151	2.12464
BTF3	100	1.42997e-152	2.21975e-150	1.28391
VAMP8	101	2.60997e-152	4.01134e-150	1.046
AP002990.1	102	9.89057e-152	1.50521e-149	0.784507
RPL23	103	5.84789e-151	8.81329e-149	1.67751
RPSA	104	7.34388e-147	1.09614e-144	1.23233
AC120057.2	105	7.76524e-147	1.148e-144	0.977139
TMSB4X	106	3.64855e-146	5.34306e-144	2.29684
RPL24	107	8.96979e-146	1.30129e-143	1.82822
ARPC1B	108	3.34233e-145	4.80398e-143	1.04282
NDUFB2	109	2.30429e-143	3.28161e-141	0.91826
RPL12	110	4.16996e-143	5.88457e-141	2.08808
UQCRB	111	1.49638e-141	2.09264e-139	1.37518
EEF1B2	112	1.03253e-140	1.43107e-138	1.42807
CHCHD2	113	9.47689e-140	1.30186e-137	1.00515
SH3BGRL	114	4.60744e-139	6.2738e-137	0.956564
RPL38	115	9.35461e-139	1.26271e-136	1.84765
RPL7	116	2.16663e-137	2.89936e-135	1.16737
HLA-DPB1	117	3.11298e-137	4.13016e-135	1.55627
SH3BGRL3	118	8.49734e-136	1.11783e-133	1.45799
COX6B1	119	1.28876e-135	1.68112e-133	1.21924
ELOB	120	6.21639e-135	8.04142e-133	0.952617
SSR4	121	1.41479e-133	1.81502e-131	0.867636
ATP5MF	122	1.07719e-131	1.37059e-129	0.95472
UQCRH	123	1.39322e-131	1.75829e-129	0.952423
RNASET2	124	1.85322e-131	2.31996e-129	1.60861
RPL31	125	9.30821e-129	1.15593e-126	1.3224
TPT1	126	1.33284e-122	1.64203e-120	1.70424
RPL37	127	2.84325e-121	3.47525e-119	2.02556
RPS20	128	2.60736e-120	3.16203e-118	1.42721
SNHG29	129	2.58738e-116	3.11348e-114	0.783816
EIF3K	130	1.61624e-115	1.92991e-113	0.757361
BST2	131	1.90741e-115	2.26021e-113	0.881059
RGS10	132	5.10299e-115	6.00104e-113	1.36054
CLIC1	133	6.18566e-115	7.21955e-113	1.07534
BRK1	134	1.57007e-114	1.81882e-112	0.682647
RPS17	135	2.73818e-114	3.1485e-112	0.798903
ACTB	136	8.11293e-114	9.26007e-112	1.80208
CAPG	137	2.30987e-113	2.61724e-111	0.766302
COX5B	138	4.59935e-113	5.17361e-111	0.944821
APOE	139	5.82139e-113	6.50111e-111	2.21294
RPS16	140	3.59018e-112	3.98074e-110	1.63449
ALOX5AP	141	6.48823e-112	7.14304e-110	0.889912
GAPDH	142	2.28641e-111	2.49943e-109	1.54438
COX6C	143	7.75103e-111	8.41394e-109	1.09486
ATP5PF	144	1.1721e-110	1.26351e-108	0.800582
UQCR10	145	1.21629e-110	1.3021e-108	1.09719
FCGRT	146	3.17403e-110	3.37469e-108	1.08878
GPX4	147	9.36929e-110	9.89384e-108	1.0754
PARK7	148	9.89744e-110	1.03809e-107	0.658579
NDUFA4	149	2.84873e-109	2.96785e-107	0.94687
YBX1	150	3.64545e-108	3.77255e-106	1.28034
NDUFA13	151	1.90806e-107	1.96151e-105	0.815815
TMEM14C	152	4.01263e-107	4.0979e-105	0.640761
MYL12B	153	4.31328e-107	4.37615e-105	0.893459
CHCHD10	154	6.58427e-107	6.63686e-105	0.94804
MICOS10	155	1.62508e-105	1.62749e-103	0.771338
GSTP1	156	1.66847e-104	1.66024e-102	0.757857
ATP5F1D	157	2.52894e-104	2.50043e-102	0.740438
PYCARD	158	3.63362e-104	3.56992e-102	0.755533
UBL5	159	2.55989e-103	2.49919e-101	1.05346
COX8A	160	5.61268e-103	5.44535e-101	0.617934
SEC11A	161	2.01405e-102	1.94187e-100	0.701062
PPIA	162	2.19666e-102	2.10486e-100	0.838433
EEF1D	163	8.08055e-102	7.69536e-100	0.978772
ARHGDIB	164	2.41081e-101	2.28189e-99	0.883665
NDUFA11	165	2.83139e-101	2.66374e-99	0.546594
AC243919.1	166	2.5275e-100	2.36352e-98	0.929986
APOC1	167	6.36222e-100	5.91381e-98	2.07747
GMFG	168	6.99284e-100	6.4613e-98	0.769405
SERF2	169	9.94329e-100	9.13311e-98	1.52284
TREM2	170	1.56312e-99	1.42732e-97	1.08262
DAD1	171	3.00211e-99	2.72525e-97	0.709102
NDUFC2	172	9.20669e-99	8.30904e-97	0.684561
LY86	173	3.16109e-98	2.83639e-96	0.828676
FCGR3A	174	7.0602e-98	6.29859e-96	0.98145
NEDD8	175	8.98578e-98	7.97065e-96	0.454189
PPIB	176	1.01959e-96	8.99271e-95	0.907042
ATP6V1F	177	4.11738e-96	3.61097e-94	1.00939
EDF1	178	9.80919e-96	8.55438e-94	0.83209
COX6A1	179	1.37128e-95	1.18918e-93	0.772143
COX7A2	180	1.30659e-94	1.12679e-92	0.743156
SPCS1	181	2.3512e-93	2.01644e-91	0.731477
APRT	182	4.51761e-93	3.85313e-91	0.427266
POMP	183	4.56324e-93	3.87078e-91	0.911791
RPL17	184	1.01821e-92	8.59001e-91	1.07601
HLA-DRA	185	1.30572e-92	1.09561e-90	1.63036
NDUFB4	186	6.56916e-92	5.48242e-90	0.71212
ATP5PO	187	1.93975e-91	1.6102e-89	0.524245
HCST	188	4.04991e-91	3.34398e-89	1.16732
HINT1	189	4.56907e-91	3.75268e-89	0.5412
SUMO2	190	1.98403e-90	1.62095e-88	0.611385
CTSS	191	2.23919e-90	1.81984e-88	0.746332
TMEM258	192	2.28516e-90	1.84753e-88	0.691108
HLA-DMA	193	4.35134e-89	3.49979e-87	0.808268
SEC61G	194	4.45011e-88	3.56078e-86	0.623925
NDUFB11	195	6.62952e-88	5.27744e-86	0.630588
CALM2	196	1.89766e-87	1.50293e-85	0.876634
VSIG4	197	1.11691e-86	8.80089e-85	0.723204
ATP5MC3	198	1.87559e-86	1.47044e-84	0.625534
NDUFS5	199	2.21039e-86	1.72421e-84	0.873609
GSTO1	200	3.42605e-86	2.65913e-84	0.599084
ATOX1	201	6.21624e-86	4.80073e-84	0.634433
IFITM3	202	6.66635e-86	5.12286e-84	1.00532
HLA-DRB5	203	1.16218e-85	8.88697e-84	1.00972
RPL36AL	204	4.89498e-85	3.72474e-83	1.20463
TALDO1	205	1.19426e-84	9.04315e-83	0.454545
SNX3	206	2.85854e-84	2.15403e-82	0.735169
LAMTOR4	207	3.03218e-84	2.27384e-82	0.545761
TMSB10	208	3.35327e-84	2.50254e-82	1.4972
SRP14	209	1.85086e-83	1.37469e-81	1.11768
ARPC5	210	3.01979e-83	2.2322e-81	0.723371
NDUFA1	211	4.57108e-83	3.36288e-81	0.856596
SMDT1	212	1.11484e-82	8.16306e-81	0.541496
GNG5	213	1.26925e-82	9.25005e-81	0.859066
RNASEK-C17orf49	214	1.6184e-82	1.17395e-80	0.728433
CD74	215	1.07845e-81	7.78642e-80	1.39002
ATP5MPL	216	1.23635e-80	8.8851e-79	0.694837
RPL39	217	1.45682e-80	1.04213e-78	1.62362
SEC61B	218	1.60987e-80	1.14633e-78	0.785738
COPS9	219	8.06747e-80	5.71833e-78	0.533393
LST1	220	1.76547e-79	1.2457e-77	0.966757
TMA7	221	6.6556e-79	4.67488e-77	1.10851
MYL12A	222	8.00704e-79	5.5988e-77	0.796722
RPL4	223	1.30443e-78	9.08009e-77	0.887837
GYPC	224	2.52861e-78	1.7523e-76	0.666695
LY96	225	2.57507e-77	1.77657e-75	0.542125
EIF3G	226	5.96184e-77	4.09494e-75	0.509956
KRTCAP2	227	9.1898e-77	6.28429e-75	0.620715
FOLR2	228	1.69916e-76	1.15684e-74	0.656299
MGST3	229	2.63272e-76	1.78462e-74	0.498795
RAC1	230	1.98843e-75	1.34202e-73	1.11017
AC245033.1	231	3.7098e-75	2.49295e-73	0.442695
BRI3	232	4.01079e-75	2.6836e-73	0.556014
TOMM6	233	4.1516e-75	2.76589e-73	0.393073
DHRS7	234	4.1839e-75	2.7755e-73	0.600042
C9orf16	235	4.21423e-75	2.78372e-73	0.595255
RHOA	236	1.29902e-74	8.54436e-73	0.77802
ATP5ME	237	2.62759e-74	1.72102e-72	0.78948
MIF	238	7.36672e-74	4.80477e-72	0.735823
CD99_ENSG00000002586	239	1.18122e-73	7.67202e-72	0.623777
GPX1	240	1.39291e-73	9.00924e-72	1.40888
ERP29	241	8.33665e-73	5.3697e-71	0.469643
RPL9	242	1.19919e-72	7.69215e-71	0.95393
LAMTOR1	243	1.48603e-72	9.49289e-71	0.358598
C4orf48	244	4.57273e-72	2.90912e-70	0.652123
NDUFB8	245	5.28955e-72	3.35142e-70	0.515861
BLOC1S1	246	5.59726e-72	3.53196e-70	0.53448
NDUFA3	247	7.75582e-72	4.87424e-70	0.64285
COX7B	248	9.1012e-72	5.69669e-70	0.847673
IGSF6	249	1.1457e-71	7.14247e-70	0.772141
NDUFB3	250	3.30409e-71	2.05158e-69	0.475563
DDT	251	5.03883e-71	3.11624e-69	0.393091
ANAPC11	252	5.58658e-71	3.44129e-69	0.419788
RPL36A	253	4.263e-70	2.61559e-68	1.10627
PHPT1	254	5.23623e-70	3.20008e-68	0.525945
LGALS1	255	9.42757e-70	5.73899e-68	0.897264
MPC2	256	1.03932e-69	6.30209e-68	0.526447
RBX1	257	7.59689e-69	4.58858e-67	0.603087
PEBP1	258	1.28289e-68	7.71873e-67	0.531377
UXT	259	1.52584e-68	9.14505e-67	0.451366
PRDX5	260	1.77129e-68	1.05753e-66	0.436159
DRAP1	261	2.74812e-68	1.63445e-66	0.684269
C19orf53	262	8.0885e-68	4.79228e-66	0.622427
FIS1	263	9.20726e-68	5.43439e-66	0.444655
LAPTM5	264	9.48705e-68	5.57832e-66	1.00297
IFI27	265	1.17372e-67	6.87533e-66	1.04098
COTL1	266	1.47936e-67	8.63311e-66	0.888351
AC010422.8	267	2.38752e-67	1.38807e-65	0.299352
MZT2B	268	8.6452e-67	5.00744e-65	0.598129
TMEM219	269	1.02798e-66	5.9321e-65	0.425364
PSME2	270	1.47416e-66	8.47535e-65	0.576155
NDUFB7	271	1.55651e-66	8.91575e-65	0.441855
FTH1	272	2.35199e-66	1.34228e-64	1.84927
NDUFB10	273	3.77339e-66	2.14558e-64	0.470797
EIF3H	274	1.28939e-65	7.30483e-64	0.505913
LTC4S	275	1.68311e-65	9.50068e-64	0.801162
IFI27L2	276	2.59756e-65	1.46094e-63	0.446398
ATP5PD	277	3.79404e-65	2.12617e-63	0.617346
C1orf54	278	3.81064e-65	2.12779e-63	0.55904
ATP5MD	279	4.70983e-65	2.62046e-63	0.819896
NOP53	280	4.88645e-65	2.70901e-63	0.573827
ATP6V0C	281	8.65805e-65	4.78288e-63	0.468315
AC253536.7	282	1.12225e-64	6.17753e-63	0.316735
AP000350.4	283	1.66492e-64	9.13237e-63	0.466533
IFI6	284	1.984e-64	1.08442e-62	0.612077
RPL21P16	285	2.03036e-64	1.10587e-62	0.610615
ATP6V0B	286	4.40828e-64	2.39265e-62	0.795258
AP2S1	287	4.64177e-64	2.5106e-62	0.500135
ARL6IP4	288	8.77994e-64	4.73233e-62	0.477042
CPVL	289	1.61247e-63	8.66102e-62	0.553318
GPSM3	290	4.00906e-63	2.14595e-61	0.487328
EIF3E	291	7.8365e-63	4.18027e-61	0.442897
AC093525.2	292	1.21918e-62	6.48127e-61	0.457144
PSMA7	293	3.50485e-62	1.85685e-60	0.588332
CKLF	294	8.62543e-62	4.55417e-60	0.540149
PSAP	295	1.23384e-61	6.49248e-60	1.03278
WDR83OS	296	1.97878e-61	1.03772e-59	0.250286
MGST2	297	2.72469e-61	1.42409e-59	0.487245
PSMB3	298	7.98195e-61	4.15785e-59	0.444382
BCAP31	299	2.83224e-60	1.4704e-58	0.441977
MYDGF	300	5.29758e-60	2.74114e-58	0.273658
TBCA	301	1.67833e-59	8.65541e-58	0.512792
CTSD	302	2.0322e-59	1.04456e-57	0.481477
SSR2	303	3.03213e-59	1.55339e-57	0.408788
CHMP2A	304	3.89959e-59	1.99123e-57	0.412178
ACTG1	305	7.71457e-59	3.92634e-57	1.10651
IFITM2	306	1.12365e-58	5.70012e-57	0.509472
SEM1	307	1.2691e-58	6.41703e-57	0.653101
GGTA1P	308	1.93715e-58	9.7631e-57	0.50862
CFL1	309	4.94823e-58	2.4858e-56	0.757303
RPS26	310	5.1318e-58	2.56971e-56	0.921657
ATP5F1C	311	1.12088e-57	5.59467e-56	0.474525
CDC42	312	1.39871e-57	6.95901e-56	0.79313
RABAC1	313	1.83523e-57	9.10167e-56	0.388294
SELENOH	314	3.18892e-57	1.57648e-55	0.528593
LY6E	315	3.907e-57	1.92534e-55	0.310367
ARPC2	316	4.30489e-57	2.11471e-55	0.789779
PSME1	317	4.82647e-57	2.36345e-55	0.452614
TMED9	318	8.57085e-57	4.18382e-55	0.472687
CD302	319	1.10637e-56	5.36941e-55	0.500123
LAPTM4A	320	1.10688e-56	5.36941e-55	0.512297
NDUFS6	321	1.31779e-56	6.37262e-55	0.458838
AC010618.1	322	2.34188e-56	1.12897e-54	0.415231
CIAO2B	323	2.79046e-56	1.34106e-54	0.442386
ROMO1	324	5.39326e-56	2.58394e-54	0.458885
CD14	325	1.06046e-55	5.0651e-54	1.00009
VDAC1	326	1.15928e-55	5.52009e-54	0.539975
TMEM59	327	1.32778e-55	6.30312e-54	0.386588
DYNLRB1	328	1.49025e-55	7.0528e-54	0.521355
CTSH	329	2.05699e-55	9.70537e-54	0.584357
SLC25A6_ENSG00000169100	330	2.98808e-55	1.40558e-53	0.587078
LAMTOR2	331	5.03105e-55	2.35943e-53	0.408636
SPCS2	332	6.92697e-55	3.23878e-53	0.463106
COX5A	333	1.16928e-54	5.45067e-53	0.448919
PTMA	334	2.87755e-54	1.33737e-52	1.12594
UFC1	335	4.37427e-54	2.02692e-52	0.417606
REX1BD	336	5.72086e-54	2.643e-52	0.488737
PSMB6	337	1.25686e-53	5.7894e-52	0.380578
CAPZB	338	1.68515e-53	7.73922e-52	0.77581
POLR2L	339	1.75103e-53	8.01807e-52	0.569567
TMEM256	340	2.57492e-53	1.1756e-51	0.335789
SCP2	341	1.90268e-52	8.66138e-51	0.360235
TMBIM6	342	2.66592e-52	1.21003e-50	0.736629
HLA-DRB1	343	2.80603e-52	1.26991e-50	1.16054
NSA2	344	3.28173e-52	1.48088e-50	0.583491
YWHAE	345	4.38514e-52	1.97306e-50	0.537594
SSR3	346	6.20809e-52	2.78521e-50	0.466939
APOC2	347	7.52311e-52	3.36545e-50	0.981715
COPE	348	1.12323e-51	5.01031e-50	0.513328
RNF181	349	1.65541e-51	7.363e-50	0.389974
EIF5A	350	2.23599e-51	9.91693e-50	0.509983
ARL6IP5	351	7.24654e-51	3.20479e-49	0.499607
TMEM176B	352	3.39917e-50	1.49901e-48	0.42927
UQCRQ	353	4.18938e-50	1.84226e-48	0.636669
VEGFB	354	5.56852e-50	2.44181e-48	0.381635
SUB1	355	6.78501e-50	2.96687e-48	0.671005
HLA-C	356	9.51111e-50	4.14722e-48	0.759935
APOC4-APOC2	357	1.00343e-49	4.36309e-48	0.869882
PSMB1	358	1.21768e-49	5.27988e-48	0.446913
TRIR	359	1.95791e-49	8.46594e-48	0.523723
A2M	360	3.46023e-49	1.49203e-47	0.706057
NDUFB9	361	4.56588e-49	1.96333e-47	0.215952
SLIRP	362	1.27027e-48	5.44706e-47	0.410161
YWHAB	363	1.62174e-48	6.93505e-47	0.60152
ALKBH7	364	1.77215e-48	7.55745e-47	0.3478
PPA1	365	1.84088e-48	7.82902e-47	0.323857
HLA-B	366	2.29424e-48	9.73045e-47	0.844994
LDHB	367	3.79959e-48	1.60711e-46	0.220974
C4orf3	368	6.21206e-48	2.62037e-46	0.482269
CTSC	369	9.95412e-48	4.18747e-46	0.567124
GSN	370	1.18715e-47	4.98058e-46	0.662473
GPR34	371	1.62757e-47	6.80992e-46	0.666228
ETFB	372	2.03399e-47	8.48754e-46	0.288924
ATRAID	373	2.20934e-47	9.19454e-46	0.3213
PDIA3	374	4.22732e-47	1.75456e-45	0.551795
HIGD2A	375	7.40926e-47	3.06704e-45	0.325077
GTF3A	376	7.49282e-47	3.09338e-45	0.421841
PCED1B-AS1	377	8.62263e-47	3.55037e-45	0.435743
NDUFA12	378	9.03981e-47	3.7123e-45	0.271786
NDUFB5	379	1.02552e-46	4.20029e-45	0.281289
PPT1	380	1.0372e-46	4.23698e-45	0.357577
BIN1	381	1.11476e-46	4.54183e-45	0.681731
HSBP1	382	1.38415e-46	5.62465e-45	0.432391
RPS27L	383	1.41021e-46	5.71557e-45	0.639454
RNASE6	384	1.92035e-46	7.76291e-45	0.431066
MICOS13	385	1.92544e-46	7.76327e-45	0.352195
RHOG	386	2.17908e-46	8.76318e-45	0.427112
GNG10	387	2.21403e-46	8.88073e-45	0.244909
TMBIM4	388	2.48332e-46	9.93521e-45	0.468623
NDUFB1	389	2.49353e-46	9.9504e-45	0.564078
ANXA5	390	6.69945e-46	2.66655e-44	0.723204
NDUFAB1	391	9.56825e-46	3.79867e-44	0.293863
EIF2S2	392	1.11338e-45	4.40893e-44	0.390341
RNF130	393	1.42365e-45	5.62324e-44	0.428977
NOP10	394	1.98856e-45	7.83461e-44	0.541144
MSRB2	395	2.01495e-45	7.91848e-44	0.340827
TMEM50A	396	2.19033e-45	8.58598e-44	0.403652
FXYD5	397	2.30199e-45	9.00094e-44	0.465536
C1QBP	398	3.70102e-45	1.44349e-43	0.293517
GADD45GIP1	399	4.37308e-45	1.70134e-43	0.375099
CSTB	400	5.49496e-45	2.13246e-43	0.829427
TRAPPC1	401	5.61538e-45	2.17375e-43	0.273586
ASAH1	402	6.43804e-45	2.48601e-43	0.632031
SRSF9	403	1.26968e-44	4.89062e-43	0.403302
UBE2L3	404	1.66011e-44	6.37869e-43	0.37882
MS4A4A	405	1.69599e-44	6.50047e-43	0.373837
OSTC	406	1.88371e-44	7.20217e-43	0.298285
FKBP1A	407	3.68076e-44	1.40384e-42	0.205457
CTSZ	408	3.79425e-44	1.44358e-42	0.746591
GUK1	409	5.16383e-44	1.95986e-42	0.521909
TIMP2	410	5.61305e-44	2.12515e-42	0.508784
NDUFV2	411	6.14149e-44	2.31957e-42	0.313718
CD53	412	1.15442e-43	4.34953e-42	0.601557
AC007192.1	413	1.23434e-43	4.63937e-42	0.329428
GLRX	414	1.52299e-43	5.71048e-42	0.346356
ENO1	415	1.64042e-43	6.13597e-42	0.467479
CIB1	416	1.67978e-43	6.26807e-42	0.405061
COMT	417	1.90331e-43	7.08515e-42	0.395295
POLR2J	418	2.82826e-43	1.05031e-41	0.365729
CLTA	419	3.26202e-43	1.20851e-41	0.350765
LSM4	420	3.42504e-43	1.26588e-41	0.289208
NAPSB	421	3.58792e-43	1.32293e-41	0.453062
NDUFA7	422	4.08972e-43	1.50438e-41	0.210475
AC008763.3	423	4.4999e-43	1.65135e-41	0.255235
GABARAPL2	424	6.00177e-43	2.1973e-41	0.463155
SERPINB1	425	6.43453e-43	2.35019e-41	0.474663
ARF1	426	9.63512e-43	3.51094e-41	0.534358
SSBP1	427	1.20513e-42	4.38109e-41	0.475496
BAX	428	1.23522e-42	4.47999e-41	0.46494
AC093512.2	429	1.27689e-42	4.62033e-41	0.35363
ISCU	430	1.5642e-42	5.64678e-41	0.474857
NPM1	431	1.79515e-42	6.46546e-41	0.769155
PLAAT4	432	2.8223e-42	1.01413e-40	0.293677
AL365205.1	433	4.41626e-42	1.58323e-40	0.3596
ERH	434	6.58317e-42	2.35462e-40	0.419593
TMEM160	435	1.19378e-41	4.26002e-40	0.273696
AL359762.3	436	1.2338e-41	4.39274e-40	0.475735
MS4A7	437	1.35169e-41	4.80145e-40	0.831404
TMEM35B	438	1.48291e-41	5.25552e-40	0.130235
CD37	439	1.85842e-41	6.57134e-40	0.621491
NDUFA6	440	2.31826e-41	8.17873e-40	0.32015
LSM3	441	2.78509e-41	9.8034e-40	0.34591
ATP5IF1	442	2.9445e-41	1.0341e-39	0.53854
TNFSF13B	443	4.85547e-41	1.70139e-39	0.344909
C1orf162	444	7.09363e-41	2.48005e-39	0.669969
SNHG6	445	8.56583e-41	2.98803e-39	0.716988
DDOST	446	9.18054e-41	3.18988e-39	0.254144
PSMB9	447	9.18558e-41	3.18988e-39	0.269745
DNAJC15	448	9.50874e-41	3.29474e-39	0.357993
THOC7	449	1.60435e-40	5.54663e-39	0.248233
PDIA6	450	1.99402e-40	6.8785e-39	0.307918
MDH2	451	2.27369e-40	7.82583e-39	0.279257
PRELID1	452	3.41387e-40	1.17242e-38	0.352239
PSMA2	453	3.95459e-40	1.35512e-38	0.238247
DNAJC25-GNG10	454	4.4493e-40	1.52129e-38	0.232595
UBE2L6	455	5.65969e-40	1.93089e-38	0.245243
RBIS	456	7.09024e-40	2.41364e-38	0.43558
TMED2	457	8.9654e-40	3.04529e-38	0.243985
SELENOT	458	9.93308e-40	3.36662e-38	0.326732
RAB5C	459	1.3008e-39	4.39921e-38	0.203144
NAP1L1	460	3.27856e-39	1.10637e-37	0.633875
CDK2AP1	461	3.68449e-39	1.24066e-37	0.323984
GRN	462	6.62889e-39	2.22728e-37	0.476429
TRAPPC5	463	6.95516e-39	2.33185e-37	0.262711
REEP5	464	1.20097e-38	4.01781e-37	0.377472
MRPS36	465	1.20529e-38	4.02359e-37	0.310417
RWDD1	466	1.29136e-38	4.30168e-37	0.370411
CORO1A	467	1.40556e-38	4.67206e-37	0.491165
GTF2A2	468	2.24475e-38	7.44556e-37	0.309226
NENF	469	2.36654e-38	7.8328e-37	0.259429
HNRNPA1	470	3.66997e-38	1.21211e-36	0.590822
SYS1-DBNDD2	471	3.97516e-38	1.31012e-36	0.191067
AURKAIP1	472	3.9903e-38	1.31232e-36	0.317432
PPDPF	473	4.25255e-38	1.39561e-36	0.359767
PET100	474	5.0718e-38	1.66096e-36	0.425894
MNDA	475	5.08433e-38	1.66156e-36	0.577089
CNPY3	476	8.45257e-38	2.7565e-36	0.50326
NDUFA2	477	8.57125e-38	2.78934e-36	0.42906
TMEM230	478	9.48004e-38	3.07863e-36	0.171071
LSM7	479	9.58687e-38	3.10683e-36	0.431436
GNAI2	480	1.22283e-37	3.9546e-36	0.580113
POLR2I	481	1.27024e-37	4.09936e-36	0.221575
CAP1	482	1.42261e-37	4.58158e-36	0.453878
ANP32B	483	1.47753e-37	4.74046e-36	0.38886
FKBP2	484	1.47806e-37	4.74046e-36	0.284116
MORF4L1	485	1.83675e-37	5.87875e-36	0.544158
JTB	486	3.87382e-37	1.23731e-35	0.242923
SNRPD1	487	7.06786e-37	2.25286e-35	0.33215
NAA38	488	9.84876e-37	3.13283e-35	0.356399
ITM2C	489	1.19524e-36	3.79422e-35	0.230335
PIH1D1	490	1.211e-36	3.83639e-35	0.332849
ANAPC16	491	1.296e-36	4.09733e-35	0.37076
MRPL52	492	1.33759e-36	4.2202e-35	0.363415
PSENEN	493	1.95351e-36	6.15099e-35	0.222706
TMED10	494	2.07411e-36	6.51751e-35	0.37623
TOMM20	495	3.09924e-36	9.7191e-35	0.417579
HLA-DQB1	496	3.4074e-36	1.06639e-34	0.689783
HTRA1	497	3.62804e-36	1.13316e-34	0.514935
SNRPB	498	4.36205e-36	1.35968e-34	0.361718
CD59	499	7.57658e-36	2.35694e-34	0.194954
CHURC1	500	7.77727e-36	2.41453e-34	0.278103
LAMTOR5	501	8.114e-36	2.51404e-34	0.350261
NINJ1	502	1.15411e-35	3.56878e-34	0.56443
DNPH1	503	1.16168e-35	3.58505e-34	0.232
AKR1A1	504	1.27017e-35	3.91206e-34	0.368599
NDUFA8	505	2.20797e-35	6.78698e-34	0.189436
FAM49B	506	2.61818e-35	8.03202e-34	0.496711
RER1	507	2.7861e-35	8.53029e-34	0.276177
PSMB2	508	3.23654e-35	9.88994e-34	0.225176
OSTF1	509	3.45356e-35	1.05324e-33	0.383132
SFT2D1	510	3.57807e-35	1.08906e-33	0.304519
DBI	511	4.17187e-35	1.26732e-33	0.883527
PSMB10	512	7.66061e-35	2.32257e-33	0.219098
UQCC2	513	9.43329e-35	2.85444e-33	0.322541
AC016876.2	514	9.50963e-35	2.87195e-33	0.775772
TXNL4A	515	1.06276e-34	3.20334e-33	0.268272
CARD16	516	1.08922e-34	3.27674e-33	0.31955
TXN	517	1.24343e-34	3.73341e-33	0.438919
LINC01736	518	1.34932e-34	4.04352e-33	0.406085
C20orf27	519	1.35695e-34	4.05856e-33	0.222099
PPP1R14B	520	2.16002e-34	6.44807e-33	0.288183
TIMP1	521	2.41697e-34	7.20128e-33	0.365538
EIF4EBP1	522	2.56449e-34	7.62616e-33	0.269926
C12orf75	523	2.76492e-34	8.20648e-33	0.291383
RNASEH2C	524	3.14726e-34	9.32347e-33	0.278964
DBNDD2	525	3.3136e-34	9.79753e-33	0.186541
NDUFS8	526	4.59254e-34	1.35532e-32	0.257453
CNBP	527	5.34329e-34	1.57389e-32	0.379982
CYTL1	528	6.70812e-34	1.97216e-32	0.275525
AL713999.1	529	7.41446e-34	2.1757e-32	0.268843
BLVRB	530	7.52602e-34	2.20427e-32	0.282243
ESD	531	8.82059e-34	2.57857e-32	0.226044
PILRA	532	9.34216e-34	2.72591e-32	0.32015
ARPC4	533	1.07952e-33	3.14398e-32	0.221354
ARF5	534	1.09525e-33	3.1838e-32	0.269095
NDUFS7	535	1.39332e-33	4.04271e-32	0.278261
SEC11C	536	1.87749e-33	5.43738e-32	0.229243
ITGB2	537	2.05333e-33	5.93553e-32	0.521182
VKORC1	538	2.12272e-33	6.12471e-32	0.136556
VPS29	539	2.25166e-33	6.48471e-32	0.360896
AP2M1	540	3.01512e-33	8.66734e-32	0.273856
MRPL20	541	3.79354e-33	1.08849e-31	0.284904
FCGR1A	542	5.03784e-33	1.44285e-31	0.460384
EBI3	543	5.25186e-33	1.50138e-31	0.287896
PDCD5	544	5.53834e-33	1.58036e-31	0.3144
RSL24D1	545	5.86803e-33	1.67137e-31	0.368413
SET	546	6.89793e-33	1.96111e-31	0.476104
LGALS9	547	7.12475e-33	2.02189e-31	0.428109
COA3	548	7.58876e-33	2.14964e-31	0.112289
SELENOF	549	8.68692e-33	2.45623e-31	0.235384
GDI2	550	1.02136e-32	2.88266e-31	0.315762
OLFML3	551	1.21677e-32	3.42792e-31	0.261788
SEC62	552	1.26893e-32	3.56839e-31	0.538751
PTMS	553	1.33764e-32	3.75481e-31	0.378584
LMAN2	554	1.37801e-32	3.86117e-31	0.234271
MRPS34	555	2.18223e-32	6.10355e-31	0.205398
SARAF	556	2.3753e-32	6.6316e-31	0.486227
LAMP1	557	2.41259e-32	6.72364e-31	0.345805
NDUFC1	558	3.27028e-32	9.09052e-31	0.428112
S100A10	559	3.2736e-32	9.09052e-31	0.337125
CALM3	560	3.60888e-32	1.00037e-30	0.287918
KDELR1	561	3.84275e-32	1.0633e-30	0.293277
NDUFAF3	562	5.63377e-32	1.5561e-30	0.293343
ATP6V1G1	563	5.83045e-32	1.60757e-30	0.489573
TFPT	564	6.29062e-32	1.73137e-30	0.199931
TMEM123	565	7.29798e-32	2.00507e-30	0.235133
H3F3A	566	7.44518e-32	2.0419e-30	0.660405
MRPL40	567	9.57603e-32	2.62167e-30	0.228706
NME1	568	9.72909e-32	2.65888e-30	0.160459
CUTA	569	1.46186e-31	3.98812e-30	0.250519
SNRPF	570	1.72481e-31	4.69724e-30	0.358506
TMEM179B	571	1.73012e-31	4.70344e-30	0.176012
SERPINA1	572	2.80878e-31	7.62249e-30	0.277614
PKM	573	2.9788e-31	8.0698e-30	0.349334
S100A9	574	3.17386e-31	8.58325e-30	0.31094
UBE2D2	575	4.91158e-31	1.32595e-29	0.303492
HLA-A	576	5.4937e-31	1.48053e-29	0.711871
GTF3C6	577	5.77996e-31	1.55498e-29	0.263514
TPRKB	578	7.78396e-31	2.09049e-29	0.19454
SMIM26	579	8.22184e-31	2.20428e-29	0.228041
MRPS21	580	9.18142e-31	2.4573e-29	0.426144
SNRPD3	581	1.08435e-30	2.89713e-29	0.275553
TMEM147	582	1.15372e-30	3.07719e-29	0.216439
SNRPD2	583	1.2193e-30	3.24651e-29	0.37361
METTL26	584	1.26317e-30	3.35756e-29	0.226419
AP003481.1	585	1.2972e-30	3.44212e-29	0.379028
PLAAT3	586	1.52517e-30	4.04013e-29	0.336157
FTL	587	1.65593e-30	4.37905e-29	0.768534
CHMP5	588	2.04519e-30	5.39924e-29	0.294758
ANP32A	589	2.10893e-30	5.55804e-29	0.484561
MTLN	590	2.12944e-30	5.60258e-29	0.297909
ATP6AP2	591	2.1626e-30	5.68021e-29	0.373783
AP001931.1	592	2.42744e-30	6.36506e-29	0.207446
RANBP1	593	2.9156e-30	7.63218e-29	0.258835
SYNJ2BP-COX16	594	3.0521e-30	7.97604e-29	0.164578
PRDX3	595	3.11122e-30	8.11688e-29	0.215862
ASNA1	596	3.81294e-30	9.93093e-29	0.159392
PTTG1IP	597	3.87487e-30	1.00753e-28	0.343823
CSTA	598	4.2364e-30	1.09969e-28	0.18239
TNFSF12	599	4.54391e-30	1.17755e-28	0.14221
ARL2	600	4.76135e-30	1.23184e-28	0.135993
FAAP20	601	5.47264e-30	1.41351e-28	0.200416
VPS28	602	6.96567e-30	1.79615e-28	0.364921
NBL1	603	7.07473e-30	1.82124e-28	0.247656
EIF3I	604	7.50275e-30	1.92823e-28	0.282331
SIVA1	605	8.14629e-30	2.09016e-28	0.231123
TCEA1	606	9.16402e-30	2.34741e-28	0.251169
TMEM189-UBE2V1	607	9.68604e-30	2.47704e-28	0.26326
UCP2	608	9.99693e-30	2.55234e-28	0.399648
RPS10-NUDT3	609	1.18958e-29	3.03216e-28	0.389145
PFDN2	610	1.41724e-29	3.60653e-28	0.460932
COX16	611	1.45269e-29	3.6907e-28	0.202878
CD86	612	1.48949e-29	3.77801e-28	0.362069
CTSL	613	1.51766e-29	3.84316e-28	0.517564
CYBB	614	1.70145e-29	4.30156e-28	0.430135
TRAM1	615	1.76202e-29	4.44746e-28	0.25532
AKR1B1	616	2.03159e-29	5.11953e-28	0.292567
ISG15	617	2.21695e-29	5.57758e-28	0.501881
LGALS3BP	618	3.12094e-29	7.83921e-28	0.199132
ECHS1	619	3.48628e-29	8.74273e-28	0.222228
2023-09-07	620	3.99646e-29	1.0006e-27	0.406306
C11orf58	621	6.37881e-29	1.5945e-27	0.366955
TIMM13	622	8.82418e-29	2.20221e-27	0.172856
PCBD1	623	1.09658e-28	2.73229e-27	0.13983
DGUOK	624	1.29305e-28	3.21667e-27	0.218855
BTF3L4	625	1.54348e-28	3.8335e-27	0.258157
CISD3	626	1.82723e-28	4.531e-27	0.168675
SPINT2	627	2.12654e-28	5.26479e-27	0.141627
TMEM176A	628	2.84123e-28	7.023e-27	0.217697
NUDT1	629	2.92018e-28	7.20668e-27	0.228329
MTPN	630	2.95876e-28	7.29029e-27	0.319543
GIMAP4	631	3.01758e-28	7.42345e-27	0.306975
PSMC5	632	5.05597e-28	1.24183e-26	0.244972
MRPL54	633	7.40425e-28	1.81574e-26	0.203628
S100A4	634	7.6122e-28	1.86379e-26	0.329413
SDCBP	635	8.34449e-28	2.03987e-26	0.572519
NDUFS4	636	9.95475e-28	2.42968e-26	0.195683
PIN4	637	1.04342e-27	2.54271e-26	0.273339
RNF7	638	1.39392e-27	3.3915e-26	0.201135
RAP1B	639	1.42637e-27	3.46503e-26	0.356035
PGAM1	640	1.67896e-27	4.07226e-26	0.169302
AC004687.2	641	1.75531e-27	4.25081e-26	0.148978
AP001453.5	642	1.96354e-27	4.74768e-26	0.254679
MEA1	643	2.03614e-27	4.91556e-26	0.155184
HSP90B1	644	2.378e-27	5.73193e-26	0.56316
CALHM6	645	2.40667e-27	5.79204e-26	0.259443
NUCKS1	646	2.83004e-27	6.80043e-26	0.493749
PSMB7	647	2.87238e-27	6.89149e-26	0.183985
SPATS2L	648	3.24959e-27	7.78448e-26	0.383882
MRPL21	649	3.52926e-27	8.44141e-26	0.162705
ATP5MC1	650	3.67772e-27	8.78297e-26	0.31664
SPP1	651	4.45049e-27	1.06121e-25	1.2123
MRPS18C	652	6.47975e-27	1.54272e-25	0.205779
SERBP1	653	6.64335e-27	1.57925e-25	0.364764
TLN1	654	6.90868e-27	1.63981e-25	0.435151
OCIAD1	655	7.08756e-27	1.6797e-25	0.292787
RTN4	656	8.56275e-27	2.02621e-25	0.443049
ERCC1	657	8.73845e-27	2.06464e-25	0.281533
AC091564.7	658	1.01932e-26	2.40469e-25	0.170892
ZNF428	659	1.07168e-26	2.52438e-25	0.191407
COMMD1	660	1.5935e-26	3.74786e-25	0.20975
ENSA	661	1.83657e-26	4.31302e-25	0.148566
EMC7	662	1.96909e-26	4.61724e-25	0.160787
AP003419.1	663	2.14778e-26	5.02867e-25	0.184602
RAP1A	664	2.47832e-26	5.79381e-25	0.388178
GTF2H5	665	3.06884e-26	7.16355e-25	0.252873
LIPA	666	3.37931e-26	7.87642e-25	0.28793
PTPMT1	667	3.90379e-26	9.08524e-25	0.193286
ARL6IP1	668	5.69365e-26	1.32309e-24	0.45358
PSMB5	669	6.04493e-26	1.40262e-24	0.111133
MRPL23	670	7.27103e-26	1.6846e-24	0.181708
PRDX2	671	7.80619e-26	1.80589e-24	0.128809
HMGN1	672	9.18295e-26	2.12123e-24	0.514848
CMPK1	673	1.18653e-25	2.73679e-24	0.19659
COX17	674	1.21063e-25	2.78823e-24	0.429494
LSM10	675	1.34299e-25	3.08847e-24	0.120987
SRP9	676	1.59946e-25	3.67284e-24	0.234965
TKT	677	1.9416e-25	4.45192e-24	0.203543
BSG	678	2.1342e-25	4.88631e-24	0.244488
SNRPE	679	3.1841e-25	7.27936e-24	0.242543
DYNLL1	680	4.1161e-25	9.3962e-24	0.508566
COX14	681	4.49461e-25	1.02353e-23	0.128806
RNASE1	682	4.49686e-25	1.02353e-23	0.360546
HAMP	683	4.92368e-25	1.11904e-23	0.426857
MRPL51	684	5.24701e-25	1.19078e-23	0.276399
SF3B6	685	5.60452e-25	1.27006e-23	0.288936
CCNI	686	5.65947e-25	1.28064e-23	0.401589
SMS	687	6.9405e-25	1.56823e-23	0.314582
CHCHD5	688	7.91879e-25	1.78668e-23	0.161072
CANX	689	8.17179e-25	1.84108e-23	0.35947
CCT7	690	8.90837e-25	2.00413e-23	0.169993
BANF1	691	1.09563e-24	2.46127e-23	0.325122
MZT2A	692	1.12848e-24	2.53142e-23	0.161058
PPCS	693	1.21389e-24	2.71907e-23	0.145019
ECH1	694	1.28027e-24	2.86364e-23	0.20706
CCDC124	695	1.88024e-24	4.19956e-23	0.194476
DYNLT1	696	1.9407e-24	4.32836e-23	0.271341
GLIPR2	697	2.01073e-24	4.47812e-23	0.148619
TMEM14B	698	2.08401e-24	4.63469e-23	0.166246
CSNK2B	699	2.18998e-24	4.8634e-23	0.235662
SERPINF1	700	3.0719e-24	6.81216e-23	0.254201
NAA20	701	4.28089e-24	9.47964e-23	0.307796
COX7A2L	702	4.31848e-24	9.54926e-23	0.176276
MPC1	703	5.30976e-24	1.17245e-22	0.20928
RHOC	704	5.86807e-24	1.29389e-22	0.211324
FAM173A	705	7.10916e-24	1.56533e-22	0.159531
GRB2	706	7.84514e-24	1.72493e-22	0.32205
TUFM	707	8.32989e-24	1.82892e-22	0.224489
YWHAH	708	1.03549e-23	2.27033e-22	0.533169
AL133410.3	709	1.05586e-23	2.31173e-22	0.101948
AC040162.1	710	1.17123e-23	2.5607e-22	0.152668
SSNA1	711	1.17984e-23	2.5759e-22	0.221339
TXNL1	712	1.19988e-23	2.61598e-22	0.216273
NUDT14	713	1.26333e-23	2.75045e-22	0.168304
USF2	714	1.28631e-23	2.79656e-22	0.334092
VMA21	715	1.32512e-23	2.87476e-22	0.227162
TMIGD3	716	1.32599e-23	2.87476e-22	0.556548
NHP2	717	1.4298e-23	3.09551e-22	0.16091
CLTB	718	1.5044e-23	3.25247e-22	0.210131
RAB32	719	1.62315e-23	3.50434e-22	0.214011
DPM3	720	1.708e-23	3.68239e-22	0.205766
SUMO3	721	2.371e-23	5.10472e-22	0.21338
MRPL14	722	2.62412e-23	5.64043e-22	0.291327
AP005263.1	723	2.62709e-23	5.64043e-22	0.16345
S100B	724	2.65182e-23	5.68567e-22	0.188614
RTF2	725	4.48429e-23	9.60133e-22	0.218832
UBE2M	726	4.50138e-23	9.62465e-22	0.224267
DMAC1	727	5.75454e-23	1.22872e-21	0.145582
IER3IP1	728	5.77496e-23	1.23138e-21	0.138836
LSM5	729	6.43211e-23	1.36962e-21	0.214133
PRDX4	730	7.00656e-23	1.4899e-21	0.15857
NUTF2	731	7.91849e-23	1.68151e-21	0.158891
AIG1	732	8.11892e-23	1.72172e-21	0.223119
DSTN	733	1.03958e-22	2.20155e-21	0.190108
SNU13	734	1.31596e-22	2.78306e-21	0.360613
PSMG2	735	1.32619e-22	2.80088e-21	0.216079
RPN2	736	1.35606e-22	2.86007e-21	0.248098
CAST	737	1.36081e-22	2.86619e-21	0.390345
SUPT4H1	738	1.42537e-22	2.99811e-21	0.148489
EIF4B	739	1.43969e-22	3.02412e-21	0.259876
MS4A6A	740	1.60716e-22	3.37134e-21	0.453423
DECR1	741	1.88074e-22	3.93991e-21	0.177613
LEPROTL1	742	1.97806e-22	4.13821e-21	0.154109
CFD	743	2.04395e-22	4.27028e-21	0.232275
SPI1	744	2.13999e-22	4.46492e-21	0.441018
AC021087.5	745	2.2114e-22	4.60773e-21	0.103845
TMEM109	746	2.29992e-22	4.78574e-21	0.130875
SPCS3	747	2.33793e-22	4.85833e-21	0.31659
AIDA	748	2.63609e-22	5.47058e-21	0.182201
PHB	749	2.84344e-22	5.89301e-21	0.175574
SELENOP	750	2.98315e-22	6.17433e-21	0.168326
SSB	751	3.08313e-22	6.37275e-21	0.340137
SMIM19	752	3.22818e-22	6.6637e-21	0.188835
BCL7C	753	3.55604e-22	7.33073e-21	0.160113
SELENOM	754	4.17014e-22	8.58529e-21	0.168729
STMP1	755	4.25755e-22	8.75363e-21	0.143635
SERP1	756	4.27266e-22	8.77309e-21	0.534126
STMN1	757	4.37222e-22	8.96565e-21	0.232367
SCAMP2	758	5.32193e-22	1.08987e-20	0.282425
FAM162A	759	5.38519e-22	1.10137e-20	0.248521
SMCO4	760	5.78204e-22	1.18098e-20	0.18232
METTL5	761	6.20094e-22	1.26488e-20	0.173269
ZNHIT1	762	6.4814e-22	1.32035e-20	0.240695
TRAPPC2L	763	7.43934e-22	1.51351e-20	0.155808
CREG1	764	8.73338e-22	1.77445e-20	0.328318
RTRAF	765	1.0086e-21	2.04659e-20	0.324282
CX3CR1	766	1.05087e-21	2.12958e-20	0.311191
PSMB8	767	1.0805e-21	2.18678e-20	0.217071
BOLA2	768	1.25167e-21	2.5299e-20	0.140206
PPP1R18	769	1.71871e-21	3.46939e-20	0.233528
CALR	770	2.56939e-21	5.17982e-20	0.508499
IGBP1	771	2.73952e-21	5.51563e-20	0.149169
M6PR	772	2.77269e-21	5.57519e-20	0.238953
LAMP2	773	3.49451e-21	7.01749e-20	0.197583
AL445685.3	774	3.91389e-21	7.84953e-20	0.105156
VSIR	775	4.37641e-21	8.7658e-20	0.420507
PIN1	776	4.63543e-21	9.27265e-20	0.132999
ST13	777	5.04439e-21	1.00777e-19	0.302252
HSD17B10	778	5.12682e-21	1.02293e-19	0.113189
HNMT	779	6.54688e-21	1.30459e-19	0.214827
DGCR6L	780	6.88362e-21	1.36993e-19	0.103658
DNAJC8	781	7.90034e-21	1.57026e-19	0.275307
GSTK1	782	8.53671e-21	1.69457e-19	0.235609
MDH1	783	1.04698e-20	2.07477e-19	0.166981
PSMD4	784	1.04788e-20	2.07477e-19	0.197339
MRPL34	785	1.11418e-20	2.20325e-19	0.231402
EVI2B	786	1.17402e-20	2.31861e-19	0.310774
APLP2	787	1.57797e-20	3.11243e-19	0.364226
AC114490.2	788	1.70154e-20	3.3519e-19	0.132761
PRDX1	789	2.12132e-20	4.17354e-19	0.544139
JOSD2	790	2.27767e-20	4.47548e-19	0.130843
SNX17	791	2.60918e-20	5.12038e-19	0.120201
OLA1	792	2.6129e-20	5.12121e-19	0.154323
EIF3L	793	2.64704e-20	5.18158e-19	0.199564
RNASE2	794	2.68044e-20	5.24037e-19	0.210424
FAM89B	795	2.75862e-20	5.38643e-19	0.137522
TMCO1	796	3.02989e-20	5.90866e-19	0.202111
EIF3D	797	3.18238e-20	6.19826e-19	0.213782
MESD	798	4.10559e-20	7.98634e-19	0.202982
TWF2	799	4.51006e-20	8.76216e-19	0.133333
GAMT	800	5.30471e-20	1.02931e-18	0.115102
PTRHD1	801	6.51417e-20	1.26242e-18	0.152648
TIMM10	802	6.86908e-20	1.32954e-18	0.155176
RPS4Y1	803	7.21628e-20	1.395e-18	0.214515
COPZ1	804	7.22705e-20	1.39534e-18	0.151674
UBE2V1	805	7.89323e-20	1.52207e-18	0.238712
MRPL41	806	8.16835e-20	1.57317e-18	0.291283
MRPL53	807	8.48498e-20	1.63212e-18	0.1476
ERG28	808	8.76288e-20	1.68349e-18	0.0789924
AC010323.1	809	9.21895e-20	1.76892e-18	0.106942
PSMA5	810	1.00066e-19	1.91769e-18	0.191546
POLD4	811	1.15596e-19	2.21257e-18	0.212796
WASHC3	812	1.17986e-19	2.25434e-18	0.191801
PRDX6	813	1.18069e-19	2.25434e-18	0.294882
TAF10	814	1.21484e-19	2.31671e-18	0.264566
SRI	815	1.32628e-19	2.52612e-18	0.235855
UBE2I	816	1.46264e-19	2.78243e-18	0.239937
PSMC4	817	1.57772e-19	2.99766e-18	0.19433
LYZ	818	1.69965e-19	3.22539e-18	0.240264
GRHPR	819	1.79349e-19	3.39932e-18	0.10498
PRR13	820	1.96864e-19	3.72673e-18	0.214185
SCOC	821	2.38026e-19	4.50046e-18	0.130332
PEPD	822	2.4329e-19	4.5944e-18	0.169032
PSMD8	823	2.68332e-19	5.06114e-18	0.22212
CDV3	824	2.72145e-19	5.12683e-18	0.433067
BOLA2B	825	2.78257e-19	5.23562e-18	0.134289
PPP1R7	826	2.97174e-19	5.58479e-18	0.143179
CAPZA2	827	3.23308e-19	6.06857e-18	0.273537
ANXA2	828	3.30091e-19	6.18841e-18	0.152483
STX8	829	3.38061e-19	6.33018e-18	0.157441
ZCRB1	830	4.32277e-19	8.08462e-18	0.191411
ETHE1	831	4.34025e-19	8.10755e-18	0.120807
RGS19	832	4.52921e-19	8.45034e-18	0.275104
RAC2	833	4.96247e-19	9.24759e-18	0.142339
SUCLG1	834	5.77596e-19	1.07506e-17	0.128981
POLE4	835	5.96277e-19	1.1085e-17	0.133389
NDUFB6	836	6.75458e-19	1.2542e-17	0.199004
TPM3	837	7.0631e-19	1.30951e-17	0.479997
UBXN1	838	7.07352e-19	1.30951e-17	0.342007
HPGDS	839	7.07774e-19	1.30951e-17	0.254755
PIGP	840	7.63688e-19	1.41128e-17	0.142744
HSPB11	841	7.99451e-19	1.47561e-17	0.160231
NME3	842	9.41402e-19	1.73556e-17	0.262126
MRPL11	843	1.06718e-18	1.96511e-17	0.148695
MAP2K2	844	1.1983e-18	2.20393e-17	0.191486
NPL	845	1.24162e-18	2.28091e-17	0.238555
NAXE	846	1.43721e-18	2.6371e-17	0.0934995
BNIP3L	847	1.45449e-18	2.66564e-17	0.145829
FKBP5	848	1.49895e-18	2.7439e-17	0.410457
KDELR2	849	1.55e-18	2.834e-17	0.160109
MOB1A	850	1.62571e-18	2.96893e-17	0.324253
AC069503.2	851	1.67644e-18	3.05797e-17	0.0462317
FUOM	852	1.71295e-18	3.12091e-17	0.151255
DUT	853	1.76527e-18	3.21245e-17	0.249496
SUSD3	854	1.83158e-18	3.32923e-17	0.184424
NDFIP1	855	1.93847e-18	3.5194e-17	0.241903
PPP1CA	856	2.03522e-18	3.69075e-17	0.162957
FKBP3	857	2.26472e-18	4.10213e-17	0.188953
DEK	858	2.3844e-18	4.31388e-17	0.349967
CLNS1A	859	3.33292e-18	6.02292e-17	0.117725
RPA3	860	3.39563e-18	6.12911e-17	0.162064
SNX2	861	4.06916e-18	7.32792e-17	0.245925
ALDOA	862	4.06923e-18	7.32792e-17	0.276565
AC004057.1	863	4.0781e-18	7.33539e-17	0.176022
HNRNPC	864	4.89536e-18	8.79522e-17	0.349268
HINT2	865	5.02246e-18	9.01313e-17	0.107943
TRAPPC6A	866	5.23157e-18	9.37757e-17	0.118402
CHMP3	867	6.0109e-18	1.07621e-16	0.155252
RPLP0	868	6.15577e-18	1.10088e-16	0.525472
RPS19BP1	869	6.77771e-18	1.21071e-16	0.210135
ABI3	870	6.86215e-18	1.22438e-16	0.215234
AKR7A2	871	8.15729e-18	1.4538e-16	0.108208
IDH3G	872	8.98282e-18	1.59909e-16	0.119168
SKAP2	873	9.14254e-18	1.62565e-16	0.277938
AL121594.1	874	9.34887e-18	1.66044e-16	0.144556
COPRS	875	9.47169e-18	1.68033e-16	0.123598
MRPL13	876	1.03626e-17	1.83628e-16	0.117589
RHEB	877	1.06686e-17	1.88835e-16	0.317755
TMIGD2	878	1.10748e-17	1.95802e-16	0.132344
SDHB	879	1.14234e-17	2.01736e-16	0.169788
ORMDL2	880	1.20597e-17	2.1273e-16	0.163462
TPM4	881	1.25987e-17	2.21986e-16	0.361291
TXNDC15	882	1.46079e-17	2.57095e-16	0.0856033
NBDY	883	1.47311e-17	2.5897e-16	0.217934
SHISA5	884	1.51897e-17	2.66731e-16	0.108145
LIMS1	885	1.8525e-17	3.2493e-16	0.439779
UQCRFS1	886	2.13582e-17	3.74203e-16	0.170169
RNH1	887	2.22621e-17	3.89599e-16	0.214392
S100A6	888	2.27462e-17	3.97624e-16	0.311682
ACTR2	889	2.2891e-17	3.99704e-16	0.32784
DUSP23	890	2.3299e-17	4.06371e-16	0.125526
TBCB	891	2.39174e-17	4.1669e-16	0.169003
PHB2	892	2.41855e-17	4.20887e-16	0.179069
YIF1A	893	2.48046e-17	4.31179e-16	0.107745
PSMA6	894	2.68367e-17	4.65981e-16	0.151752
HTATIP2	895	3.05321e-17	5.29553e-16	0.105513
TMED3	896	3.46536e-17	6.00365e-16	0.0608431
DNAJC19	897	3.83301e-17	6.6332e-16	0.159298
POLR2G	898	4.56955e-17	7.89902e-16	0.125902
SSU72	899	5.78615e-17	9.99093e-16	0.223475
TMEM9B	900	6.68434e-17	1.1529e-15	0.214201
TMEM126A	901	7.11952e-17	1.2266e-15	0.137325
CNIH1	902	7.2886e-17	1.25433e-15	0.111753
RPL26L1	903	7.44995e-17	1.28068e-15	0.195354
H2AFY	904	7.90429e-17	1.35728e-15	0.302306
EIF3F	905	8.10024e-17	1.38939e-15	0.292656
ABRACL	906	8.83834e-17	1.51432e-15	0.154185
TUSC2	907	9.0288e-17	1.54525e-15	0.101976
ALDH2	908	9.3409e-17	1.5969e-15	0.278855
FIBP	909	9.83229e-17	1.67906e-15	0.126537
CIAO2A	910	1.00418e-16	1.71295e-15	0.182196
SLC25A11	911	1.01108e-16	1.72283e-15	0.122832
ATP5PB	912	1.0264e-16	1.74701e-15	0.195941
FCGBP	913	1.05574e-16	1.79498e-15	0.280777
SELENOK	914	1.15407e-16	1.96002e-15	0.550557
CYC1	915	1.19413e-16	2.02584e-15	0.159447
FABP5	916	1.23656e-16	2.09554e-15	0.455902
SUMF2	917	1.27244e-16	2.15399e-15	0.143041
MCUB	918	1.34291e-16	2.27081e-15	0.120282
MRPL22	919	1.37384e-16	2.32058e-15	0.137223
SNRPG	920	1.41601e-16	2.3892e-15	0.343104
CREBL2	921	1.43295e-16	2.41516e-15	0.170898
TYMP	922	1.49305e-16	2.51373e-15	0.4309
METTL7A	923	1.5043e-16	2.52994e-15	0.19998
APH1A	924	1.52937e-16	2.56931e-15	0.164897
RTN3	925	1.80482e-16	3.02879e-15	0.18984
LYSMD2	926	1.82181e-16	3.05399e-15	0.168721
GLO1	927	1.87018e-16	3.1317e-15	0.130509
LRPAP1	928	1.95261e-16	3.26621e-15	0.250937
PA2G4	929	2.05774e-16	3.43835e-15	0.204537
CTSB	930	2.09056e-16	3.48944e-15	0.393612
CD300A	931	2.22092e-16	3.70304e-15	0.219276
SDHD	932	2.42334e-16	4.03622e-15	0.0917034
EFHD2	933	2.59088e-16	4.31064e-15	0.318956
S100A8	934	2.59937e-16	4.32014e-15	0.249248
CD48	935	2.82907e-16	4.69685e-15	0.0933012
DCK	936	2.92554e-16	4.85183e-15	0.143348
EBPL	937	2.94253e-16	4.87479e-15	0.127204
PLAUR	938	2.94753e-16	4.87789e-15	0.388258
LMAN1	939	2.9668e-16	4.90453e-15	0.206417
GATD3B	940	3.01467e-16	4.97838e-15	0.0537044
EIF3CL	941	3.17698e-16	5.24084e-15	0.152678
POLR2F	942	3.19043e-16	5.25744e-15	0.157753
AC004551.1	943	3.31712e-16	5.46041e-15	0.135462
NUDT5	944	3.65897e-16	6.01676e-15	0.147207
HADHA	945	3.99201e-16	6.55746e-15	0.246193
LSM2	946	4.44012e-16	7.28583e-15	0.188662
GHITM	947	5.04877e-16	8.27583e-15	0.189137
MBD2	948	5.54034e-16	9.07202e-15	0.177071
TAF12	949	5.64488e-16	9.23345e-15	0.10122
BID	950	6.18044e-16	1.00988e-14	0.237984
THYN1	951	6.2258e-16	1.01623e-14	0.124558
PYURF	952	6.40997e-16	1.04519e-14	0.181601
ERP44	953	6.47428e-16	1.05457e-14	0.216017
DDRGK1	954	6.63974e-16	1.08039e-14	0.172299
SHARPIN	955	7.14147e-16	1.16081e-14	0.121165
MAGOH	956	7.28724e-16	1.18326e-14	0.25128
TXNDC12	957	7.46732e-16	1.21124e-14	0.11168
RAB8A	958	8.28798e-16	1.34295e-14	0.223406
CTSA	959	8.44194e-16	1.36647e-14	0.160965
PAIP2	960	1.01348e-15	1.63877e-14	0.225249
CASP4	961	1.10306e-15	1.78177e-14	0.150385
C7orf50	962	1.1344e-15	1.83049e-14	0.136434
ACP1	963	1.13895e-15	1.83592e-14	0.152311
IFI35	964	1.14576e-15	1.84499e-14	0.127566
P4HB	965	1.22835e-15	1.97593e-14	0.231319
LAT2	966	1.28834e-15	2.07028e-14	0.236666
EIF3C	967	1.4522e-15	2.32904e-14	0.161578
SKA2	968	1.45237e-15	2.32904e-14	0.093046
VIM	969	1.5635e-15	2.50466e-14	0.316557
VBP1	970	1.59565e-15	2.55353e-14	0.111921
MTDH	971	1.65267e-15	2.64205e-14	0.326038
PLAC8	972	1.66302e-15	2.65586e-14	0.120211
SQOR	973	1.66901e-15	2.66269e-14	0.110313
METRNL	974	1.69241e-15	2.69726e-14	0.305449
STOM	975	1.70641e-15	2.71677e-14	0.163666
PDZD11	976	1.87125e-15	2.97617e-14	0.103113
RNF187	977	1.93963e-15	3.08177e-14	0.0751808
PGK1	978	2.00805e-15	3.18722e-14	0.261922
VTI1B	979	2.03177e-15	3.22158e-14	0.146973
CAPNS1	980	2.14119e-15	3.3916e-14	0.104
FBP1	981	2.14739e-15	3.39796e-14	0.102068
TMEM167A	982	2.15818e-15	3.41156e-14	0.209394
ACAT1	983	2.24006e-15	3.53738e-14	0.0784112
RAB13	984	2.34596e-15	3.70085e-14	0.12049
PPM1G	985	2.36008e-15	3.71933e-14	0.165907
NSMCE1	986	2.49047e-15	3.92085e-14	0.110438
MYH9	987	2.56804e-15	4.03888e-14	0.232356
CISD2	988	2.67618e-15	4.2047e-14	0.16007
RAB5IF	989	2.70084e-15	4.23914e-14	0.195175
RAN	990	2.83298e-15	4.44206e-14	0.322806
CCS	991	3.10183e-15	4.85869e-14	0.146749
CLEC9A	992	3.24101e-15	5.07159e-14	0.136267
SLAMF8	993	3.31168e-15	5.17695e-14	0.0684877
CCT3	994	3.34209e-15	5.21924e-14	0.203083
NDUFA5	995	3.45532e-15	5.39064e-14	0.191335
URGCP-MRPS24	996	3.85811e-15	6.01299e-14	0.112901
METTL9	997	4.1913e-15	6.52573e-14	0.155
MRPL24	998	4.31312e-15	6.70867e-14	0.0788299
HMGN3	999	4.38175e-15	6.8086e-14	0.302765
TXNDC17	1000	4.58487e-15	7.1171e-14	0.216896
PSMD9	1001	4.80869e-15	7.45707e-14	0.0777981
PDCD6	1002	4.90971e-15	7.60612e-14	0.106155
TMEM126B	1003	5.07727e-15	7.85787e-14	0.128599
BASP1	1004	5.35722e-15	8.28288e-14	0.467253
UBE2E1	1005	5.57688e-15	8.61393e-14	0.112034
MANF	1006	5.92741e-15	9.14624e-14	0.13356
LMO2	1007	6.26756e-15	9.6615e-14	0.197217
IFT20	1008	6.50128e-15	1.00118e-13	0.146176
ANXA7	1009	6.63724e-15	1.02111e-13	0.143806
ITGB1	1010	6.90179e-15	1.06076e-13	0.283281
CCDC167	1011	7.09071e-15	1.08871e-13	0.0765112
NDUFS3	1012	7.31631e-15	1.12224e-13	0.176424
HCFC1R1	1013	8.01185e-15	1.22772e-13	0.116567
U2AF1L5	1014	9.82482e-15	1.50405e-13	0.23337
PSMA4	1015	9.9759e-15	1.52567e-13	0.211059
PLD4	1016	1.03088e-14	1.57503e-13	0.20835
RAB2A	1017	1.03591e-14	1.58117e-13	0.27916
PLA2G7	1018	1.08712e-14	1.6577e-13	0.185429
LSM1	1019	1.22047e-14	1.85922e-13	0.122973
ACTR3	1020	1.29506e-14	1.96905e-13	0.273884
DCTN3	1021	1.29511e-14	1.96905e-13	0.120594
TSTD1	1022	1.34848e-14	2.04819e-13	0.0634199
SDHC	1023	1.44013e-14	2.18526e-13	0.164793
GPN3	1024	1.55862e-14	2.36273e-13	0.164272
LGALS3	1025	1.56325e-14	2.36745e-13	0.125877
PINK1-AS	1026	1.60455e-14	2.42763e-13	0.0706893
CD163	1027	1.61164e-14	2.43598e-13	0.32152
BAD	1028	1.67622e-14	2.53112e-13	0.0949612
SVBP	1029	1.8001e-14	2.71554e-13	0.188738
PCMT1	1030	1.83314e-14	2.7627e-13	0.108258
CHCHD1	1031	2.03435e-14	3.06296e-13	0.152689
CCDC47	1032	2.06245e-14	3.10227e-13	0.190469
CAT	1033	2.15801e-14	3.24287e-13	0.10239
DRAM2	1034	2.18154e-14	3.27505e-13	0.172266
EIF4H	1035	2.22853e-14	3.34237e-13	0.203137
ZMAT2	1036	2.53671e-14	3.8009e-13	0.185397
SPTSSA	1037	2.56851e-14	3.84484e-13	0.0817367
NDUFAF8	1038	2.57281e-14	3.84757e-13	0.164713
MRPL15	1039	2.63275e-14	3.93342e-13	0.097946
WASF2	1040	2.70043e-14	4.03065e-13	0.345545
OSTM1	1041	2.8491e-14	4.24847e-13	0.13184
SCN1B	1042	2.91552e-14	4.34334e-13	0.136054
SNRPB2	1043	3.06496e-14	4.56158e-13	0.254419
SNRPN	1044	3.12521e-14	4.6468e-13	0.142114
LY75-CD302	1045	3.1886e-14	4.73652e-13	0.151312
RBM17	1046	3.21097e-14	4.76519e-13	0.217844
MPP1	1047	3.72996e-14	5.5301e-13	0.215754
NIPSNAP2	1048	3.97663e-14	5.89019e-13	0.151129
ALG5	1049	3.99238e-14	5.90789e-13	0.104704
QPRT	1050	4.17425e-14	6.17113e-13	0.121252
RAB10	1051	4.27321e-14	6.31142e-13	0.229335
TMEM101	1052	4.33926e-14	6.40289e-13	0.0660468
CDC26	1053	4.51006e-14	6.64859e-13	0.0886948
PARL	1054	4.93327e-14	7.26558e-13	0.0790469
GNAS	1055	5.1613e-14	7.59421e-13	0.475698
MRPS33	1056	5.26265e-14	7.736e-13	0.132392
HSD17B11	1057	5.733e-14	8.41942e-13	0.136468
FSCN3	1058	6.08587e-14	8.9292e-13	0.113192
TNFAIP8L2	1059	6.10981e-14	8.95586e-13	0.0720205
SURF1	1060	6.69327e-14	9.80185e-13	0.142486
CHCHD3	1061	6.95503e-14	1.01756e-12	0.102343
HPRT1	1062	7.15344e-14	1.0456e-12	0.0929863
SCPEP1	1063	7.42427e-14	1.08417e-12	0.235589
TMEM18	1064	7.57452e-14	1.10507e-12	0.100255
VDAC2	1065	7.72236e-14	1.12558e-12	0.239486
GNB2	1066	7.74734e-14	1.12816e-12	0.218982
CCDC142	1067	7.78991e-14	1.1333e-12	0.126033
PSMC1	1068	7.88047e-14	1.1454e-12	0.131171
TMEM243	1069	8.14249e-14	1.18238e-12	0.154283
FMC1	1070	9.04643e-14	1.31241e-12	0.0437253
HIGD1A	1071	9.48601e-14	1.3749e-12	0.0686292
ETFRF1	1072	9.74601e-14	1.41126e-12	0.0742144
2023-09-02	1073	1.01994e-13	1.47554e-12	0.23512
VAMP5	1074	1.04168e-13	1.50559e-12	0.109446
EPSTI1	1075	1.13499e-13	1.63783e-12	0.239005
MRPL28	1076	1.13529e-13	1.63783e-12	0.066868
MARCKS	1077	1.16774e-13	1.68309e-12	0.465094
EIF3M	1078	1.25514e-13	1.80737e-12	0.169581
CWC15	1079	1.27494e-13	1.83419e-12	0.241109
TMEM141	1080	1.55435e-13	2.2341e-12	0.0714698
NME4	1081	1.57218e-13	2.25763e-12	0.0891893
AC092809.2	1082	1.60696e-13	2.30543e-12	0.133995
HMGB1P6	1083	1.71613e-13	2.45979e-12	0.114938
SYPL1	1084	1.72945e-13	2.47659e-12	0.125213
TUBB	1085	1.87905e-13	2.68833e-12	0.232878
PAFAH1B3	1086	1.94217e-13	2.77608e-12	0.0530693
SELENOW	1087	2.09996e-13	2.99887e-12	0.303611
SLC12A5	1088	2.2393e-13	3.19492e-12	0.187117
MSN	1089	2.24765e-13	3.20388e-12	0.218944
AC026362.1	1090	2.33083e-13	3.3194e-12	0.149274
MRPL36	1091	2.43469e-13	3.46414e-12	0.110802
CIRBP	1092	2.66343e-13	3.78612e-12	0.318069
AIP	1093	2.73742e-13	3.88773e-12	0.130609
ZFYVE21	1094	2.76489e-13	3.92316e-12	0.0722456
ADI1	1095	2.77699e-13	3.93674e-12	0.126331
SRM	1096	2.95958e-13	4.19175e-12	0.119545
PDXK	1097	2.9836e-13	4.22191e-12	0.248294
FP565260.2	1098	3.05291e-13	4.31606e-12	0.041435
TNFSF12-TNFSF13	1099	3.44026e-13	4.85925e-12	0.103116
PFDN4	1100	3.58445e-13	5.05832e-12	0.111584
2023-03-02	1101	3.8346e-13	5.4064e-12	0.158684
AKIP1	1102	3.87071e-13	5.45236e-12	0.0952409
EIF6	1103	4.92653e-13	6.93331e-12	0.111231
GNG7	1104	5.21333e-13	7.3303e-12	0.222684
PSMF1	1105	5.38677e-13	7.56731e-12	0.0757363
VPS26A	1106	5.50313e-13	7.72378e-12	0.163548
MRPS15	1107	5.5122e-13	7.72953e-12	0.150876
PAK2	1108	5.53731e-13	7.75773e-12	0.258788
GNB1	1109	5.94923e-13	8.32732e-12	0.221307
MRPL3	1110	6.25571e-13	8.74841e-12	0.117045
FBL	1111	6.35783e-13	8.88322e-12	0.0948002
MCRIP2	1112	6.74177e-13	9.41119e-12	0.13274
ADH5	1113	6.79248e-13	9.47347e-12	0.104628
MAF1	1114	7.14597e-13	9.95754e-12	0.120329
TP53TG1	1115	7.18382e-13	1.00013e-11	0.109584
TEX264	1116	7.23929e-13	1.00695e-11	0.108376
CSDE1	1117	7.74791e-13	1.07673e-11	0.22975
NUDT2	1118	7.96921e-13	1.10649e-11	0.0782328
PDAP1	1119	9.2119e-13	1.27789e-11	0.125601
MRPL47	1120	9.70109e-13	1.34455e-11	0.132896
AD000671.2	1121	9.74318e-13	1.34918e-11	0.0970858
TSPAN3	1122	1.09356e-12	1.51295e-11	0.141671
PTPRN2	1123	1.17205e-12	1.62011e-11	0.0907149
ADRM1	1124	1.21619e-12	1.67962e-11	0.15766
EXOSC5	1125	1.23079e-12	1.69828e-11	0.053249
CUEDC2	1126	1.25361e-12	1.72823e-11	0.10252
STAC3	1127	1.28564e-12	1.77081e-11	0.0977553
TMEM119	1128	1.42363e-12	1.95914e-11	0.197706
IFNGR1	1129	1.55121e-12	2.13281e-11	0.341913
COPZ2	1130	1.65834e-12	2.27809e-11	0.0492776
PLTP	1131	1.69087e-12	2.32073e-11	0.149709
ATP6V1E1	1132	1.84763e-12	2.53187e-11	0.141973
HEBP1	1133	1.84797e-12	2.53187e-11	0.108206
DAP	1134	1.89411e-12	2.5928e-11	0.131934
RCSD1	1135	1.92958e-12	2.63902e-11	0.188621
NTAN1	1136	1.93622e-12	2.64577e-11	0.0945604
DCXR	1137	1.94609e-12	2.65692e-11	0.121577
DNAJC4	1138	1.95106e-12	2.66136e-11	0.130335
MCUR1	1139	2.08926e-12	2.84738e-11	0.107651
CTDNEP1	1140	2.18921e-12	2.98097e-11	0.0897613
PYM1	1141	2.20697e-12	3.00253e-11	0.104108
POLR3GL	1142	2.23923e-12	3.04375e-11	0.123994
XRCC5	1143	2.52007e-12	3.42249e-11	0.233928
Z84488.2	1144	2.73207e-12	3.70716e-11	0.0844239
C1orf43	1145	2.96961e-12	4.02596e-11	0.150609
CCNQ	1146	3.00468e-12	4.06995e-11	0.0724728
LSP1	1147	3.1154e-12	4.21625e-11	0.10697
MRPS35	1148	3.25671e-12	4.40365e-11	0.0747014
ECI1	1149	3.52256e-12	4.75898e-11	0.0998297
TNFSF13	1150	3.71231e-12	5.01097e-11	0.10624
PMP22	1151	3.74873e-12	5.05574e-11	0.0510214
RPL13AP5	1152	3.7804e-12	5.09402e-11	0.18919
FAM200B	1153	3.79485e-12	5.10906e-11	0.078645
SNX6	1154	3.80406e-12	5.11703e-11	0.222413
C3	1155	3.90727e-12	5.24949e-11	0.417207
COA4	1156	3.9093e-12	5.24949e-11	0.121143
SMAP2	1157	3.92348e-12	5.26397e-11	0.37963
YIPF3	1158	4.18776e-12	5.61369e-11	0.0927456
TAGLN2	1159	4.21855e-12	5.6501e-11	0.166965
GGCT	1160	4.25389e-12	5.69251e-11	0.103135
MRPL33	1161	4.59987e-12	6.1502e-11	0.122591
NSL1	1162	4.90332e-12	6.55028e-11	0.133336
ATG3	1163	5.13712e-12	6.8567e-11	0.126276
BAG1	1164	5.25593e-12	7.00926e-11	0.139805
MRPL17	1165	5.37524e-12	7.16222e-11	0.0808023
RFXANK	1166	5.51478e-12	7.34185e-11	0.101257
NINJ2	1167	5.6101e-12	7.46235e-11	0.0569584
COPS5	1168	5.70254e-12	7.57881e-11	0.106171
FAM207A	1169	6.09019e-12	8.08709e-11	0.0761419
RPL24P2	1170	6.19913e-12	8.22471e-11	0.0782047
MCTS1	1171	6.80858e-12	9.02369e-11	0.140461
SNRPC	1172	6.81296e-12	9.02369e-11	0.146123
GOLGA7	1173	6.95857e-12	9.20869e-11	0.104607
IKBIP	1174	7.20928e-12	9.53234e-11	0.151196
DHRS4L2	1175	7.21651e-12	9.53377e-11	0.071438
FCGR2B	1176	7.39004e-12	9.75473e-11	0.0592323
TXN2	1177	7.76561e-12	1.02418e-10	0.138976
COA6	1178	7.83647e-12	1.03264e-10	0.13913
EMC6	1179	7.94911e-12	1.0466e-10	0.152086
TAX1BP3	1180	7.99584e-12	1.05186e-10	0.0736406
APMAP	1181	8.19499e-12	1.07715e-10	0.215292
HNRNPR	1182	8.71555e-12	1.14386e-10	0.131532
MX1	1183	8.71729e-12	1.14386e-10	0.206187
ZNF32	1184	9.04959e-12	1.18646e-10	0.0788701
IGFLR1	1185	9.3627e-12	1.22647e-10	0.105186
CHMP4B	1186	1.13696e-11	1.48811e-10	0.202869
MRPS28	1187	1.15514e-11	1.51064e-10	0.128241
TOMM5	1188	1.17111e-11	1.53023e-10	0.151018
GALNT1	1189	1.20232e-11	1.56968e-10	0.183528
MPG	1190	1.22906e-11	1.60326e-10	0.091225
CPM	1191	1.29752e-11	1.69114e-10	0.142904
SDF2L1	1192	1.33406e-11	1.7373e-10	0.148844
ATP5F1A	1193	1.42444e-11	1.85344e-10	0.145979
KANSL1-AS1	1194	1.45835e-11	1.89598e-10	0.0752196
TSR3	1195	1.58977e-11	2.06511e-10	0.0783554
CHID1	1196	1.59544e-11	2.07074e-10	0.0685603
TLE5	1197	1.59932e-11	2.07404e-10	0.133751
SLC7A7	1198	1.8013e-11	2.33403e-10	0.143181
CCT8	1199	1.88065e-11	2.4348e-10	0.139451
PDCL3	1200	1.93533e-11	2.50352e-10	0.10196
PTGES3	1201	2.0223e-11	2.61383e-10	0.363803
MRPL16	1202	2.04934e-11	2.64658e-10	0.0969954
RNF13	1203	2.27497e-11	2.93552e-10	0.204403
LYPLAL1	1204	2.32149e-11	2.99306e-10	0.0949557
ANXA11	1205	2.32592e-11	2.99629e-10	0.153416
RILPL2	1206	2.40251e-11	3.09239e-10	0.356759
RSL1D1	1207	2.41131e-11	3.10114e-10	0.195762
TP53RK	1208	2.5389e-11	3.26253e-10	0.0559019
UCHL3	1209	2.64047e-11	3.39024e-10	0.105002
FAM204A	1210	2.88587e-11	3.70226e-10	0.162601
FUNDC1	1211	2.96171e-11	3.79641e-10	0.0784048
EID1	1212	3.44151e-11	4.4078e-10	0.241141
FUNDC2	1213	3.93183e-11	5.03164e-10	0.143953
EPB41L2	1214	4.05019e-11	5.17883e-10	0.258357
CDIPT	1215	4.21283e-11	5.38237e-10	0.0539988
ATXN10	1216	4.57634e-11	5.84198e-10	0.102182
RAB14	1217	4.7741e-11	6.08943e-10	0.190156
AC011448.1	1218	4.79404e-11	6.10984e-10	0.0943681
AC107075.1	1219	4.80895e-11	6.12381e-10	0.0432477
RAMP1	1220	4.95355e-11	6.30278e-10	0.103456
RRAS	1221	4.98752e-11	6.34081e-10	0.0914737
POP4	1222	5.08471e-11	6.45908e-10	0.0838428
AL034430.1	1223	5.32834e-11	6.76302e-10	0.0606486
URM1	1224	5.52224e-11	7.0034e-10	0.0652666
REXO2	1225	5.61561e-11	7.11601e-10	0.0876691
DIABLO_ENSG00000284934	1226	5.6347e-11	7.13438e-10	0.041012
DENND6B	1227	5.66534e-11	7.16733e-10	0.0854103
BOLA3	1228	6.01501e-11	7.6035e-10	0.110742
TSPAN33	1229	6.0383e-11	7.62674e-10	0.0449262
ELOC	1230	6.27765e-11	7.9226e-10	0.232608
AC012313.3	1231	6.31109e-11	7.95833e-10	0.0870199
ZNF706	1232	6.5271e-11	8.22404e-10	0.204009
SURF2	1233	6.81101e-11	8.57481e-10	0.0669829
DAB2	1234	6.8372e-11	8.6008e-10	0.178778
VAMP3	1235	7.39737e-11	9.29792e-10	0.13033
COA5	1236	7.7053e-11	9.67713e-10	0.109559
MED8	1237	7.71188e-11	9.67757e-10	0.0680595
CD9	1238	8.01824e-11	1.00539e-09	0.15073
HLA-E	1239	8.47459e-11	1.06175e-09	0.400391
MRPS12	1240	8.4975e-11	1.06376e-09	0.0925153
CYB5A	1241	8.55422e-11	1.07e-09	0.0864188
SAP18	1242	8.58987e-11	1.0736e-09	0.32411
P2RY12	1243	8.83927e-11	1.10388e-09	0.295073
SPAG7	1244	9.21193e-11	1.14949e-09	0.160022
TBXAS1	1245	9.42883e-11	1.17561e-09	0.224591
AC090204.1	1246	9.64352e-11	1.20141e-09	0.0649993
ZNHIT3	1247	9.77317e-11	1.21659e-09	0.0747364
SREK1IP1	1248	9.9923e-11	1.24287e-09	0.156332
POLR2K	1249	1.032e-10	1.28261e-09	0.183609
IFI27L1	1250	1.04353e-10	1.2959e-09	0.0377446
MGMT	1251	1.12944e-10	1.40146e-09	0.128347
SMIM30	1252	1.18879e-10	1.47393e-09	0.127877
CD68	1253	1.24903e-10	1.54738e-09	0.155904
UFD1	1254	1.27223e-10	1.57486e-09	0.104719
HAGH	1255	1.39641e-10	1.72721e-09	0.100199
EEF2	1256	1.43074e-10	1.76826e-09	0.286946
METRN	1257	1.48505e-10	1.83392e-09	0.056266
RALY	1258	1.49114e-10	1.83998e-09	0.0867412
AC048338.1	1259	1.49284e-10	1.84062e-09	0.0408325
NDUFA9	1260	1.58366e-10	1.95104e-09	0.0528263
CD84	1261	1.61752e-10	1.99117e-09	0.246484
IAH1	1262	1.64142e-10	2.019e-09	0.12925
TRMT112	1263	1.64835e-10	2.02592e-09	0.286408
RNPEP	1264	1.76763e-10	2.1708e-09	0.0860968
ZCCHC17	1265	1.77715e-10	2.18076e-09	0.11673
TPGS1	1266	1.84204e-10	2.25861e-09	0.11692
ZSWIM7	1267	1.86675e-10	2.28709e-09	0.10492
UQCRC2	1268	1.89619e-10	2.32133e-09	0.138024
RAB9A	1269	1.9229e-10	2.35218e-09	0.10418
ARPC1A	1270	1.96309e-10	2.39945e-09	0.0660818
H2AFV	1271	1.9863e-10	2.42592e-09	0.174077
EMC3	1272	1.99484e-10	2.43443e-09	0.121
GMPR2	1273	2.02548e-10	2.46988e-09	0.0694868
CREM	1274	2.03024e-10	2.47374e-09	0.383499
HDDC2	1275	2.10189e-10	2.55879e-09	0.064336
C19orf24	1276	2.10334e-10	2.55879e-09	0.15469
EVA1B	1277	2.12997e-10	2.58916e-09	0.0675036
NFU1	1278	2.16673e-10	2.63177e-09	0.0740945
TGIF2-RAB5IF	1279	2.18412e-10	2.65083e-09	0.043673
CHPT1	1280	2.19526e-10	2.66057e-09	0.0813544
NPTN	1281	2.19557e-10	2.66057e-09	0.112453
NUCB2	1282	2.20433e-10	2.66909e-09	0.0854733
ITPA	1283	2.30491e-10	2.78871e-09	0.0998537
SLC39A4	1284	2.41494e-10	2.91956e-09	0.0504926
CMSS1	1285	2.55098e-10	3.08162e-09	0.066715
MRPL27	1286	2.57238e-10	3.10506e-09	0.102623
CSF1R	1287	2.60859e-10	3.14632e-09	0.308692
HAUS1	1288	2.63339e-10	3.17376e-09	0.0836403
FDX1	1289	2.6484e-10	3.18939e-09	0.136773
PMVK	1290	2.67128e-10	3.21444e-09	0.111424
BRMS1	1291	2.74458e-10	3.2988e-09	0.103947
AC023055.1	1292	2.74563e-10	3.2988e-09	0.0869799
HPF1	1293	2.76975e-10	3.3252e-09	0.0678106
PLGRKT	1294	2.77564e-10	3.3297e-09	0.10015
MRPS14	1295	2.80653e-10	3.36415e-09	0.0438721
NEDD8-MDP1	1296	2.84751e-10	3.41065e-09	0.024367
ISG20	1297	2.94363e-10	3.52305e-09	0.101113
PLSCR1	1298	2.96064e-10	3.54068e-09	0.287703
PDPN	1299	2.97116e-10	3.54912e-09	0.150259
ITGB1BP1	1300	2.97227e-10	3.54912e-09	0.0836037
MRPL57	1301	3.05373e-10	3.64359e-09	0.211414
C1GALT1C1	1302	3.08747e-10	3.68101e-09	0.0473545
TMSB4XP4	1303	3.21263e-10	3.8273e-09	0.0655211
MRPS23	1304	3.23506e-10	3.85107e-09	0.0857553
FLYWCH2	1305	3.39407e-10	4.03725e-09	0.082645
TOMM22	1306	3.55532e-10	4.22583e-09	0.118354
STOML2	1307	3.56952e-10	4.23945e-09	0.0826907
SMIM4	1308	3.63327e-10	4.31187e-09	0.0943577
DESI1	1309	3.70185e-10	4.38991e-09	0.104423
ISCA2	1310	3.74285e-10	4.43514e-09	0.0984295
SCIMP	1311	3.78919e-10	4.48662e-09	0.123872
NOL7	1312	3.826e-10	4.52675e-09	0.239238
HNRNPD	1313	3.83423e-10	4.53303e-09	0.231407
GINM1	1314	3.84988e-10	4.54807e-09	0.123269
SCAND1	1315	3.90652e-10	4.61148e-09	0.208983
APOPT1	1316	4.02861e-10	4.75198e-09	0.0587437
TCEAL8	1317	4.09622e-10	4.82806e-09	0.12684
APIP	1318	4.61256e-10	5.43253e-09	0.0745796
FUCA2	1319	4.6921e-10	5.52202e-09	0.116211
MZT1	1320	4.76734e-10	5.60632e-09	0.0872198
ECI2	1321	4.78871e-10	5.62719e-09	0.0725038
LRRFIP1	1322	4.97397e-10	5.84046e-09	0.175945
EXOSC7	1323	4.98257e-10	5.84614e-09	0.0810854
AL163636.2	1324	5.42185e-10	6.35675e-09	0.0231665
FAM192A	1325	5.84222e-10	6.84444e-09	0.122258
RALBP1	1326	6.04497e-10	7.07663e-09	0.149884
SYNGR2	1327	6.14034e-10	7.18286e-09	0.123239
OS9	1328	6.22006e-10	7.27063e-09	0.177712
GTSF1	1329	6.34897e-10	7.41573e-09	0.0399867
PCNP	1330	6.78479e-10	7.91882e-09	0.163918
HEBP2	1331	7.11838e-10	8.30192e-09	0.0995885
AP3S1	1332	7.15895e-10	8.34298e-09	0.0872979
MPST	1333	7.34287e-10	8.55089e-09	0.0894885
TIMM8B	1334	7.3607e-10	8.56523e-09	0.181479
JAGN1	1335	7.54056e-10	8.76795e-09	0.0657485
CHST7	1336	7.65471e-10	8.89401e-09	0.0526814
PRMT1	1337	7.742e-10	8.98871e-09	0.162166
GNGT2	1338	8.15757e-10	9.46412e-09	0.0530886
PSMA3	1339	8.18457e-10	9.48835e-09	0.155229
SLC39A1	1340	8.40455e-10	9.73611e-09	0.0764841
NDUFV3	1341	9.00022e-10	1.04184e-08	0.18524
NTHL1	1342	9.16759e-10	1.06042e-08	0.0339551
MRPS2	1343	9.42865e-10	1.08981e-08	0.0362504
FAM107B	1344	9.98815e-10	1.15362e-08	0.149621
ACADM	1345	1.01338e-09	1.16957e-08	0.0935623
RAB8B	1346	1.09306e-09	1.26059e-08	0.182675
FKBP8	1347	1.10101e-09	1.26882e-08	0.146893
CARD6	1348	1.11343e-09	1.28139e-08	0.0443497
IARS2	1349	1.11357e-09	1.28139e-08	0.0752522
GLIPR1	1350	1.12189e-09	1.29001e-08	0.220667
SNRNP40	1351	1.13125e-09	1.29981e-08	0.0685627
STUB1	1352	1.15628e-09	1.32759e-08	0.125804
RNF5	1353	1.1821e-09	1.35622e-08	0.0839872
AL358472.7	1354	1.19908e-09	1.37469e-08	0.0586214
AL138752.2	1355	1.2163e-09	1.39341e-08	0.0696926
HADHB	1356	1.22222e-09	1.39915e-08	0.125577
CPNE3	1357	1.22367e-09	1.39979e-08	0.107566
LITAF	1358	1.23674e-09	1.41369e-08	0.19783
DBNL	1359	1.2396e-09	1.41592e-08	0.159676
EIF4EBP3	1360	1.25973e-09	1.43785e-08	0.0506589
CAMTA1	1361	1.26981e-09	1.44829e-08	0.149803
XRCC6	1362	1.29079e-09	1.47114e-08	0.162004
BUD23	1363	1.3107e-09	1.49274e-08	0.0775786
LZIC	1364	1.3625e-09	1.5506e-08	0.0798196
DPY30	1365	1.36599e-09	1.55342e-08	0.0999475
CCDC34	1366	1.42457e-09	1.61886e-08	0.0758019
FCGR2A	1367	1.5461e-09	1.75568e-08	0.184203
MSRA	1368	1.6269e-09	1.84608e-08	0.0939627
FBXL15	1369	1.7742e-09	2.01176e-08	0.076401
HNRNPA1P48	1370	1.82326e-09	2.06587e-08	0.0993681
CTSO	1371	1.88706e-09	2.1366e-08	0.0437014
MCRIP1	1372	1.89249e-09	2.14119e-08	0.134348
RPL23AP82	1373	1.91415e-09	2.16411e-08	0.0818905
DYNLT3	1374	1.92573e-09	2.17563e-08	0.0956051
AAMDC	1375	2.00991e-09	2.26907e-08	0.0778288
CLPP	1376	2.02319e-09	2.28241e-08	0.0822385
RRP7A	1377	2.10305e-09	2.37079e-08	0.115343
NIFK	1378	2.10931e-09	2.37611e-08	0.135364
HSBP1L1	1379	2.17623e-09	2.44972e-08	0.0880447
LBR	1380	2.18084e-09	2.45312e-08	0.110264
AP005530.1	1381	2.18514e-09	2.45618e-08	0.16272
SPTLC2	1382	2.2015e-09	2.47278e-08	0.264422
SAYSD1	1383	2.23736e-09	2.51124e-08	0.0399601
TM6SF1	1384	2.27568e-09	2.55242e-08	0.10962
HIKESHI	1385	2.39368e-09	2.68282e-08	0.101308
PTGES2	1386	2.404e-09	2.69245e-08	0.0720496
ARL5A	1387	2.5172e-09	2.8172e-08	0.156625
APOBEC3C	1388	2.57427e-09	2.87899e-08	0.0578609
AL049629.2	1389	2.59767e-09	2.90307e-08	0.0518319
ISOC2	1390	2.61339e-09	2.91854e-08	0.0719401
COMMD4	1391	2.63453e-09	2.94003e-08	0.109227
WDR1	1392	2.99838e-09	3.34233e-08	0.138689
NUPR1	1393	2.99933e-09	3.34233e-08	0.147002
CBX1	1394	3.03671e-09	3.38155e-08	0.0992478
ARL1	1395	3.05732e-09	3.40206e-08	0.0901807
C12orf10	1396	3.14071e-09	3.49235e-08	0.0703412
CINP	1397	3.17186e-09	3.52447e-08	0.0771805
BRD7	1398	3.1887e-09	3.54064e-08	0.16
CHURC1-FNTB	1399	3.31353e-09	3.67662e-08	0.0616168
FEZ2	1400	3.33788e-09	3.701e-08	0.186678
CRTAP	1401	3.47222e-09	3.8472e-08	0.0958318
GSPT1	1402	3.52699e-09	3.9051e-08	0.135328
ZMAT5	1403	3.61059e-09	3.99481e-08	0.0724798
SIGIRR	1404	3.7137e-09	4.10596e-08	0.126784
CAB39	1405	3.71797e-09	4.10776e-08	0.12659
PAM16	1406	3.84644e-09	4.24668e-08	0.0542647
MXD4	1407	4.17741e-09	4.60881e-08	0.197291
UBE2N	1408	4.18818e-09	4.61741e-08	0.16897
AKIRIN1	1409	4.22181e-09	4.65118e-08	0.149759
TRAPPC3	1410	4.23526e-09	4.66269e-08	0.11573
CLEC2B	1411	4.31412e-09	4.74615e-08	0.266909
SLC35F6	1412	4.34466e-09	4.77635e-08	0.0427595
ZBTB8OS	1413	4.52152e-09	4.96727e-08	0.132103
SRD5A3	1414	4.83813e-09	5.30637e-08	0.0321454
LAIR1	1415	4.83878e-09	5.30637e-08	0.206779
MRPS24	1416	4.84045e-09	5.30637e-08	0.10278
HAUS4	1417	4.95167e-09	5.42447e-08	0.0683416
GRINA	1418	5.01708e-09	5.49226e-08	0.146223
SMIM3	1419	5.14293e-09	5.62606e-08	0.0978024
ATP6V0D1	1420	5.21285e-09	5.69853e-08	0.143147
PRTFDC1	1421	5.36845e-09	5.86449e-08	0.040779
IL13RA1	1422	5.69666e-09	6.21865e-08	0.204122
NUP214	1423	5.89133e-09	6.42665e-08	0.143859
CCDC90B	1424	6.16268e-09	6.71792e-08	0.115588
CD151	1425	6.22315e-09	6.77909e-08	0.0468396
PHF5A	1426	6.64828e-09	7.23711e-08	0.104382
CNFN	1427	6.72994e-09	7.32087e-08	0.0540801
NUCB1	1428	6.83197e-09	7.42666e-08	0.128358
PSMG3	1429	6.83937e-09	7.42949e-08	0.0845932
NUDT21	1430	6.86759e-09	7.45203e-08	0.0626732
ECHDC1	1431	6.86971e-09	7.45203e-08	0.10982
IDH3A	1432	6.92822e-09	7.51025e-08	0.038182
MDP1	1433	7.09723e-09	7.68808e-08	0.0358947
ABHD14B	1434	7.18833e-09	7.78134e-08	0.0352357
RAB31	1435	7.38937e-09	7.9934e-08	0.174248
COMMD7	1436	7.50514e-09	8.11297e-08	0.0680198
ATP6AP1	1437	7.52463e-09	8.12838e-08	0.175836
HOMER3	1438	7.56527e-09	8.1666e-08	0.0878834
ABHD14A	1439	7.72303e-09	8.3311e-08	0.0350463
SNRNP25	1440	7.82393e-09	8.43409e-08	0.0700202
GPR160	1441	7.85463e-09	8.4613e-08	0.057592
ATP5F1B	1442	7.95183e-09	8.56008e-08	0.177259
ACAA2	1443	8.09271e-09	8.70569e-08	0.108833
EBP	1444	8.41175e-09	9.04263e-08	0.0322481
DCTPP1	1445	8.5923e-09	9.23033e-08	0.0480774
SINHCAF	1446	8.65947e-09	9.29605e-08	0.081284
SH3KBP1	1447	8.69757e-09	9.3305e-08	0.194903
LSM12	1448	9.11681e-09	9.7735e-08	0.128572
NFE2L2	1449	9.18878e-09	9.84385e-08	0.161631
HNRNPF	1450	9.21685e-09	9.86712e-08	0.188983
VDAC3	1451	1.00838e-08	1.07878e-07	0.109915
HMGB1P5	1452	1.04964e-08	1.12214e-07	0.104642
RNASE3	1453	1.08626e-08	1.1605e-07	0.044993
SDSL	1454	1.09074e-08	1.16448e-07	0.0673096
AC098484.3	1455	1.10583e-08	1.17978e-07	0.02545
IDH2	1456	1.14016e-08	1.21557e-07	0.125796
EBNA1BP2	1457	1.14793e-08	1.22302e-07	0.0632932
HACD4	1458	1.1519e-08	1.22641e-07	0.105055
RAB20	1459	1.16102e-08	1.23527e-07	0.218117
HERC5	1460	1.17575e-08	1.25008e-07	0.112836
AP000439.3	1461	1.18677e-08	1.26093e-07	0.0995989
HMGN2	1462	1.21457e-08	1.28959e-07	0.266811
PFDN1	1463	1.21917e-08	1.29359e-07	0.152848
MFNG	1464	1.23188e-08	1.30618e-07	0.0756787
FAM104B	1465	1.24959e-08	1.32406e-07	0.0456021
ARL8A	1466	1.26152e-08	1.33579e-07	0.140499
MRPL9	1467	1.28598e-08	1.36076e-07	0.0882326
STXBP2	1468	1.29026e-08	1.36436e-07	0.11094
AGTRAP	1469	1.37709e-08	1.45518e-07	0.0511314
APOBEC3G	1470	1.39076e-08	1.46862e-07	0.0978929
ITGAE	1471	1.40339e-08	1.48095e-07	0.084196
SP110	1472	1.40538e-08	1.48204e-07	0.193278
MRPS18B	1473	1.48835e-08	1.56848e-07	0.079898
COMMD8	1474	1.5266e-08	1.6077e-07	0.0851281
TRADD	1475	1.55385e-08	1.63528e-07	0.0599954
HDHD2	1476	1.56716e-08	1.64817e-07	0.0490121
DERL2	1477	1.60469e-08	1.6865e-07	0.115637
TATDN1	1478	1.61017e-08	1.69112e-07	0.0777717
NANS	1479	1.64743e-08	1.72907e-07	0.18813
LSM14A	1480	1.71378e-08	1.7975e-07	0.0987946
CCDC107	1481	1.74986e-08	1.83411e-07	0.154215
SSR1	1482	1.78499e-08	1.86966e-07	0.102732
MRPS18A	1483	1.84009e-08	1.92608e-07	0.0539737
CMTM6	1484	1.87622e-08	1.96217e-07	0.225312
MRPL43	1485	1.8771e-08	1.96217e-07	0.0793713
RPL7P9	1486	1.8925e-08	1.97693e-07	0.109872
CHP1	1487	1.94549e-08	2.03092e-07	0.0917883
SELL	1488	2.0006e-08	2.08705e-07	0.0498667
SRPRB	1489	2.03152e-08	2.11788e-07	0.0459304
PPP1CC	1490	2.03682e-08	2.12198e-07	0.101069
POLR3K	1491	2.07726e-08	2.16267e-07	0.0709799
NDUFC2-KCTD14	1492	2.16776e-08	2.25537e-07	0.0211997
C1orf174	1493	2.19517e-08	2.28236e-07	0.0614855
CAPZA1	1494	2.20255e-08	2.2885e-07	0.204167
TOR1A	1495	2.27609e-08	2.36332e-07	0.0661875
SUMO1	1496	2.34266e-08	2.43082e-07	0.190658
GAS6	1497	2.36405e-08	2.45138e-07	0.150489
CD33	1498	2.40132e-08	2.48837e-07	0.070753
CD40	1499	2.41214e-08	2.49791e-07	0.112613
CMTM3	1500	2.42542e-08	2.50998e-07	0.115907
GIMAP1	1501	2.58289e-08	2.67117e-07	0.0649218
A1BG	1502	2.59344e-08	2.68029e-07	0.0826542
TM2D1	1503	2.60638e-08	2.69187e-07	0.0856197
MVB12A	1504	2.61576e-08	2.69977e-07	0.0454642
DERA	1505	2.67807e-08	2.76223e-07	0.075774
TMEM208	1506	2.70095e-08	2.78399e-07	0.127098
NTPCR	1507	2.77764e-08	2.86113e-07	0.0822138
SETD3	1508	2.80132e-08	2.88361e-07	0.0993571
HOXB7	1509	2.81688e-08	2.89771e-07	0.0402139
ZNF524	1510	2.82433e-08	2.90344e-07	0.0596701
HINT3	1511	2.84029e-08	2.91611e-07	0.126853
NDUFAF2	1512	2.8404e-08	2.91611e-07	0.0876658
PON2	1513	2.88222e-08	2.95709e-07	0.101586
CCDC151	1514	2.9484e-08	3.02299e-07	0.0880556
TIMM17B	1515	3.00085e-08	3.07473e-07	0.0811302
C12orf76	1516	3.01969e-08	3.092e-07	0.0565083
TSR2	1517	3.07449e-08	3.14603e-07	0.085107
ASCL2	1518	3.29482e-08	3.36927e-07	0.0708929
BLCAP	1519	3.302e-08	3.37439e-07	0.0370409
DDA1	1520	3.30639e-08	3.37665e-07	0.0610971
RAB11A	1521	3.30947e-08	3.37757e-07	0.1196
RCAN1	1522	3.32826e-08	3.39452e-07	0.0893564
FHL3	1523	3.54735e-08	3.6156e-07	0.0832364
TACO1	1524	3.56462e-08	3.63082e-07	0.0373075
ZNRD2	1525	3.60664e-08	3.67121e-07	0.0441986
GAPT	1526	3.65289e-08	3.71584e-07	0.0567261
NDUFA10	1527	3.66763e-08	3.7284e-07	0.0845914
IMMP1L	1528	3.67708e-08	3.73381e-07	0.0485719
JPT1	1529	3.67777e-08	3.73381e-07	0.236789
CRYL1	1530	3.6897e-08	3.74348e-07	0.07049
BCL2L2-PABPN1	1531	3.72261e-08	3.7744e-07	0.108327
AHCY	1532	3.75685e-08	3.80663e-07	0.031568
TIMM9	1533	3.91442e-08	3.96371e-07	0.0788641
SMIM20	1534	3.95135e-08	3.99849e-07	0.104999
AP1S1	1535	3.96225e-08	4.00691e-07	0.0349314
UBE2V2	1536	4.03378e-08	4.07344e-07	0.118888
PDHB	1537	4.03442e-08	4.07344e-07	0.067594
RPN1	1538	4.03591e-08	4.07344e-07	0.120036
EPS15	1539	4.07434e-08	4.10955e-07	0.107897
THG1L	1540	4.20975e-08	4.24337e-07	0.04622
AC239800.2	1541	4.29882e-08	4.33034e-07	0.0904264
PPIL1	1542	4.36479e-08	4.39394e-07	0.0278275
ANAPC15	1543	4.41464e-08	4.44125e-07	0.0460087
PAIP1	1544	4.60003e-08	4.62476e-07	0.0798767
ERGIC2	1545	4.6072e-08	4.62897e-07	0.0957425
CNIH4	1546	4.63841e-08	4.65731e-07	0.0823988
PICALM	1547	4.67041e-08	4.68641e-07	0.182299
HSD17B12	1548	4.86077e-08	4.87427e-07	0.0879506
S100A13	1549	4.90619e-08	4.91664e-07	0.122627
CSRP1	1550	5.62734e-08	5.63569e-07	0.0335618
PPP2CA	1551	5.63432e-08	5.63904e-07	0.0820119
AC008575.1	1552	5.65771e-08	5.6588e-07	0.033353
C14orf119	1553	5.80028e-08	5.79767e-07	0.0947837
APPL1	1554	5.81847e-08	5.81211e-07	0.12686
RTCB	1555	5.8857e-08	5.87548e-07	0.0792589
CMC1	1556	5.97997e-08	5.96575e-07	0.114075
SMIM7	1557	6.00023e-08	5.98212e-07	0.0780508
ARPP19	1558	6.03886e-08	6.01677e-07	0.118503
STARD3NL	1559	6.255e-08	6.22811e-07	0.0803334
DERL3	1560	6.41282e-08	6.38117e-07	0.0273054
TMEM140	1561	6.61821e-08	6.58133e-07	0.0403975
CD2BP2	1562	6.81982e-08	6.77747e-07	0.0832566
NUDCD2	1563	6.96041e-08	6.91276e-07	0.105383
CALHM2	1564	7.09812e-08	7.04502e-07	0.0235859
EAPP	1565	7.25221e-08	7.19336e-07	0.0916096
RDH14	1566	7.32764e-08	7.26064e-07	0.064913
PIM3	1567	7.3294e-08	7.26064e-07	0.212459
AL662899.1	1568	7.34152e-08	7.26801e-07	0.0554136
POLR2C	1569	7.79386e-08	7.7109e-07	0.0706419
UXS1	1570	7.99009e-08	7.90001e-07	0.0518486
PRKACB	1571	8.48839e-08	8.38735e-07	0.0900592
PAXX	1572	8.65828e-08	8.54978e-07	0.156271
SLC39A3	1573	8.79461e-08	8.67342e-07	0.0394787
ETFA	1574	8.79467e-08	8.67342e-07	0.102935
PPIH	1575	9.26639e-08	9.13284e-07	0.0822515
SND1	1576	9.75338e-08	9.6067e-07	0.0785436
LSM6	1577	9.89216e-08	9.73722e-07	0.101705
GIMAP2	1578	9.92999e-08	9.76827e-07	0.0731184
PDIA4	1579	1.01726e-07	1.00005e-06	0.0773591
DCTN6	1580	1.05373e-07	1.03526e-06	0.101597
METTL23	1581	1.08578e-07	1.06607e-06	0.0587809
C22orf39	1582	1.10608e-07	1.08532e-06	0.0628766
ARL3	1583	1.12114e-07	1.09939e-06	0.0819794
MIF4GD	1584	1.12406e-07	1.10156e-06	0.0687347
PNKD	1585	1.15446e-07	1.13064e-06	0.0955117
PNPLA4	1586	1.16072e-07	1.13605e-06	0.0368921
TCEAL4	1587	1.16814e-07	1.1426e-06	0.164458
SURF4	1588	1.17402e-07	1.14763e-06	0.0877229
TYW3	1589	1.17579e-07	1.14864e-06	0.0459952
MRPL12	1590	1.17817e-07	1.15023e-06	0.0486206
CASP1	1591	1.1941e-07	1.16506e-06	0.129678
CCDC50	1592	1.20877e-07	1.17863e-06	0.158195
GCSH	1593	1.21502e-07	1.18398e-06	0.0470776
OGFOD3	1594	1.232e-07	1.19977e-06	0.0441123
TPD52	1595	1.2352e-07	1.20213e-06	0.0486921
IDNK	1596	1.30678e-07	1.271e-06	0.0501772
IGKC	1597	1.32453e-07	1.28746e-06	0.0457611
MRPL37	1598	1.33878e-07	1.30049e-06	0.0311616
NMI	1599	1.35894e-07	1.31925e-06	0.104041
C1orf122	1600	1.36073e-07	1.32017e-06	0.116535
SERPING1	1601	1.36966e-07	1.328e-06	0.0981148
AL139260.3	1602	1.37788e-07	1.33513e-06	0.0298259
VAPA	1603	1.38225e-07	1.33854e-06	0.227089
SIGLEC10	1604	1.44312e-07	1.39661e-06	0.187208
PTPN1	1605	1.45528e-07	1.40749e-06	0.184397
TMEM106C	1606	1.47024e-07	1.42108e-06	0.0387359
TGFBI	1607	1.47195e-07	1.42185e-06	0.0786036
PROCR	1608	1.50995e-07	1.45765e-06	0.0288061
AP1S2	1609	1.51109e-07	1.45784e-06	0.112541
SLC52A2	1610	1.52049e-07	1.46599e-06	0.0573343
AK6	1611	1.56773e-07	1.51061e-06	0.107654
CLEC12A	1612	1.57521e-07	1.51688e-06	0.0406037
IFNAR1	1613	1.60227e-07	1.54119e-06	0.123894
SLX1B	1614	1.60245e-07	1.54119e-06	0.0655901
PTEN	1615	1.62934e-07	1.56609e-06	0.136884
ZDHHC24	1616	1.63936e-07	1.57474e-06	0.0552154
PSMD14	1617	1.66218e-07	1.59567e-06	0.0771424
CTNNBL1	1618	1.67753e-07	1.60942e-06	0.0825432
TMEM9	1619	1.6886e-07	1.61903e-06	0.0626547
F8A1	1620	1.69055e-07	1.6199e-06	0.0760515
EMB	1621	1.69445e-07	1.62264e-06	0.106523
SNX20	1622	1.70168e-07	1.62856e-06	0.023565
SOD1	1623	1.70585e-07	1.63154e-06	0.210177
ALYREF	1624	1.72839e-07	1.65208e-06	0.0945608
TMBIM1	1625	1.76198e-07	1.68315e-06	0.106656
RAB7B	1626	1.78559e-07	1.70466e-06	0.0855441
PFDN6	1627	1.78813e-07	1.70603e-06	0.0994638
FAM210B	1628	1.8167e-07	1.73222e-06	0.0483218
CBR1	1629	1.85009e-07	1.76298e-06	0.092876
TMEM238	1630	1.86023e-07	1.77156e-06	0.0248716
DPM2	1631	1.86623e-07	1.77618e-06	0.0745259
MLX	1632	1.91835e-07	1.82466e-06	0.100508
EXOSC3	1633	1.97144e-07	1.87402e-06	0.0300016
PITPNA	1634	1.9768e-07	1.87796e-06	0.0946557
BCAP29	1635	1.9895e-07	1.88887e-06	0.0681006
NKAP	1636	2.034e-07	1.92993e-06	0.107615
CD7	1637	2.0563e-07	1.9499e-06	0.0655192
SSPN	1638	2.06628e-07	1.95817e-06	0.0382885
MRPL4	1639	2.11013e-07	1.99851e-06	0.0722143
UBL3	1640	2.15542e-07	2.04016e-06	0.163165
YPEL3	1641	2.16998e-07	2.05269e-06	0.162765
APH1B	1642	2.18248e-07	2.06325e-06	0.0910589
PLP2	1643	2.23643e-07	2.11297e-06	0.0659099
PHC2	1644	2.24435e-07	2.11917e-06	0.146893
ZNF22	1645	2.25252e-07	2.12559e-06	0.0873449
COMMD9	1646	2.33984e-07	2.20664e-06	0.0826094
SYNGR1	1647	2.37417e-07	2.23766e-06	0.0493719
EIF4E2	1648	2.39806e-07	2.2588e-06	0.0808487
PSMB4	1649	2.40237e-07	2.26149e-06	0.119757
ACTR10	1650	2.46933e-07	2.32311e-06	0.0703831
KTN1	1651	2.50374e-07	2.35406e-06	0.21726
CXCL16	1652	2.53519e-07	2.38219e-06	0.244381
AL096870.10	1653	2.55016e-07	2.39481e-06	0.0685406
AGPAT2	1654	2.5816e-07	2.42287e-06	0.0655204
CADM1	1655	2.62619e-07	2.46322e-06	0.02567
PTTG1	1656	2.63277e-07	2.46791e-06	0.0835928
CALM1	1657	2.67869e-07	2.50944e-06	0.334834
RSU1	1658	2.7028e-07	2.53049e-06	0.071705
NOSIP	1659	2.72459e-07	2.54936e-06	0.0995665
SAC3D1	1660	2.85083e-07	2.66587e-06	0.0343642
UTP18	1661	2.944e-07	2.75133e-06	0.0924405
DENR	1662	3.04721e-07	2.84608e-06	0.112001
DYNC1I2	1663	3.05489e-07	2.85154e-06	0.111446
CCNC	1664	3.06454e-07	2.85883e-06	0.0716027
SNAPC5	1665	3.09621e-07	2.88663e-06	0.0496793
AC078927.1	1666	3.13168e-07	2.91795e-06	0.0419356
BZW1P2	1667	3.24537e-07	3.02207e-06	0.0259074
PRR34-AS1	1668	3.2919e-07	3.06355e-06	0.0466619
SH3GLB1	1669	3.3087e-07	3.07735e-06	0.167383
SMARCB1	1670	3.33652e-07	3.10137e-06	0.0813576
MT2A	1671	3.38953e-07	3.14876e-06	0.533812
ALG3	1672	3.40114e-07	3.15765e-06	0.0470073
SLX1A	1673	3.40873e-07	3.1628e-06	0.064252
TIPRL	1674	3.46754e-07	3.21545e-06	0.100514
SRGN	1675	3.4911e-07	3.23537e-06	0.406683
GLRX5	1676	3.58435e-07	3.3198e-06	0.0756854
ETV5	1677	3.61034e-07	3.34188e-06	0.0904941
MKKS	1678	3.63298e-07	3.36083e-06	0.0599305
RAB18	1679	3.64692e-07	3.37171e-06	0.0924369
CORO1B	1680	3.74461e-07	3.45997e-06	0.138279
CCDC28A	1681	3.7671e-07	3.47868e-06	0.0476698
PPP1CB	1682	3.81115e-07	3.51727e-06	0.110347
TMEM220	1683	3.82201e-07	3.5252e-06	0.056061
RBP7	1684	3.8436e-07	3.543e-06	0.0388654
DHFR	1685	3.95386e-07	3.64248e-06	0.0236759
PSMD7	1686	3.99723e-07	3.68025e-06	0.105995
CMTM7	1687	4.0026e-07	3.68301e-06	0.0625775
SNAPIN	1688	4.00562e-07	3.6836e-06	0.0737354
RFLNB	1689	4.03891e-07	3.71202e-06	0.0244327
SLC2A5	1690	4.04909e-07	3.71917e-06	0.204465
LINC01094	1691	4.11116e-07	3.77395e-06	0.127048
EPHX1	1692	4.15761e-07	3.81433e-06	0.0611227
PIGK	1693	4.21325e-07	3.8631e-06	0.0416908
DNASE2	1694	4.22425e-07	3.8709e-06	0.165641
LACTB	1695	4.29521e-07	3.93361e-06	0.126377
SIGLEC9	1696	4.33878e-07	3.97116e-06	0.0364135
LCP1	1697	4.42323e-07	4.04607e-06	0.187831
BEX4	1698	4.47472e-07	4.09076e-06	0.177662
POLR1D	1699	4.56855e-07	4.17408e-06	0.0970188
SERINC1	1700	4.57158e-07	4.17439e-06	0.14312
AC110995.1	1701	4.61661e-07	4.21303e-06	0.0877459
CENPB	1702	4.65295e-07	4.2437e-06	0.0686917
NEK6	1703	4.67587e-07	4.2621e-06	0.072201
TRIQK	1704	4.73777e-07	4.31598e-06	0.0485039
DNAJC3	1705	4.82622e-07	4.39398e-06	0.123185
PSMC3	1706	4.88051e-07	4.4408e-06	0.0981384
UQCC3	1707	4.89733e-07	4.4535e-06	0.0763689
SARNP	1708	4.9608e-07	4.50858e-06	0.100812
HACD3	1709	4.98508e-07	4.52799e-06	0.065077
SYT11	1710	5.07861e-07	4.61025e-06	0.0526569
SMIM29	1711	5.15582e-07	4.6776e-06	0.0877734
PKIB	1712	5.17222e-07	4.68974e-06	0.0444685
BOD1	1713	5.19162e-07	4.70458e-06	0.0702412
SENP3-EIF4A1	1714	5.19635e-07	4.70612e-06	0.129369
ERGIC1	1715	5.32577e-07	4.82052e-06	0.08466
AATF	1716	5.43864e-07	4.91981e-06	0.0682564
LAGE3	1717	5.5597e-07	5.0264e-06	0.129135
TMEM248	1718	5.58737e-07	5.04847e-06	0.0860203
DDAH2	1719	5.66918e-07	5.11941e-06	0.185348
RTN2	1720	5.7331e-07	5.17412e-06	0.0531139
RFC2	1721	5.92063e-07	5.34027e-06	0.0746226
HLA-DMB	1722	5.99994e-07	5.40865e-06	0.208269
FPR3	1723	6.02294e-07	5.42624e-06	0.0749439
MMP2	1724	6.0575e-07	5.45421e-06	0.0779497
AC008763.2	1725	6.2499e-07	5.62419e-06	0.0218754
WSB2	1726	6.30333e-07	5.66898e-06	0.0595081
STAU1	1727	6.37571e-07	5.73075e-06	0.131346
NUDT18	1728	6.41113e-07	5.75926e-06	0.022873
TPMT	1729	6.51607e-07	5.85014e-06	0.0831473
ERGIC3	1730	6.53819e-07	5.8643e-06	0.0705463
IDH3B	1731	6.53939e-07	5.8643e-06	0.0549938
MT1F	1732	6.60963e-07	5.92386e-06	0.0629368
DPP7	1733	6.84646e-07	6.13258e-06	0.187277
C1QTNF3-AMACR	1734	7.15246e-07	6.40298e-06	0.0104315
DCAF7	1735	7.28577e-07	6.51856e-06	0.0484918
UTP11	1736	7.29601e-07	6.52396e-06	0.0786302
CYBRD1	1737	7.40077e-07	6.61383e-06	0.0576672
C12orf45	1738	7.43646e-07	6.6419e-06	0.0802148
VOPP1	1739	7.44451e-07	6.64527e-06	0.0374398
CORO7-PAM16	1740	7.46234e-07	6.65735e-06	0.0489743
TEX30	1741	7.56334e-07	6.74358e-06	0.0370806
SMUG1	1742	7.60284e-07	6.77491e-06	0.0341607
SZRD1	1743	7.82037e-07	6.96475e-06	0.0829792
CXXC5	1744	7.86957e-07	7.00455e-06	0.0539916
HTATSF1	1745	8.19298e-07	7.28659e-06	0.0642375
RILP	1746	8.19583e-07	7.28659e-06	0.060455
GLRX3	1747	8.2996e-07	7.37462e-06	0.0549208
CENPX	1748	8.58924e-07	7.62762e-06	0.0808113
STAMBP	1749	8.68973e-07	7.71244e-06	0.0734591
AC003002.2	1750	8.70504e-07	7.72162e-06	0.0108786
TMX1	1751	8.76308e-07	7.76805e-06	0.0961504
MAPRE1	1752	8.76739e-07	7.76805e-06	0.139095
CLEC4A	1753	8.87656e-07	7.86029e-06	0.0331135
THEMIS2	1754	8.89219e-07	7.86835e-06	0.160543
TOR2A	1755	8.89581e-07	7.86835e-06	0.0529457
SAMM50	1756	8.95367e-07	7.91502e-06	0.0496884
MTIF3	1757	9.06824e-07	8.01174e-06	0.128179
RIDA	1758	9.11312e-07	8.04681e-06	0.0402435
RPL39L	1759	9.21888e-07	8.13557e-06	0.0238262
FRG1	1760	9.43961e-07	8.32563e-06	0.123417
LHFPL2	1761	9.72527e-07	8.57271e-06	0.170588
GID8	1762	9.83913e-07	8.66815e-06	0.06657
MINPP1	1763	9.88336e-07	8.70218e-06	0.0220832
CHCHD4	1764	1.00353e-06	8.83098e-06	0.0226064
TMEM242	1765	1.02807e-06	9.04178e-06	0.0723784
SAP30	1766	1.07203e-06	9.42307e-06	0.195454
RPP21	1767	1.07789e-06	9.46921e-06	0.0733949
LEPROT	1768	1.08211e-06	9.50094e-06	0.0728906
PMEPA1	1769	1.09671e-06	9.62367e-06	0.165916
ACOT8	1770	1.13231e-06	9.93041e-06	0.0282723
SDHAF3	1771	1.15184e-06	1.0096e-05	0.0503442
TMED1	1772	1.15683e-06	1.0134e-05	0.0530588
BORCS7	1773	1.16113e-06	1.01659e-05	0.044445
LRMDA	1774	1.16744e-06	1.02155e-05	0.139445
RPAIN	1775	1.17447e-06	1.02711e-05	0.124894
NAA10	1776	1.17864e-06	1.03018e-05	0.0786721
FEZ1	1777	1.18946e-06	1.03847e-05	0.0199386
HSD17B4	1778	1.18947e-06	1.03847e-05	0.0598665
ILF2	1779	1.19081e-06	1.03906e-05	0.123254
MCFD2	1780	1.22078e-06	1.06461e-05	0.0858451
RFK	1781	1.23064e-06	1.07261e-05	0.0555546
CTNNA1	1782	1.2394e-06	1.07964e-05	0.103701
AC012309.1	1783	1.26148e-06	1.09826e-05	0.0290724
PEF1	1784	1.27287e-06	1.10755e-05	0.0579471
CCND3	1785	1.28269e-06	1.11547e-05	0.0927252
PPP4C	1786	1.28981e-06	1.12104e-05	0.12147
ZNF480	1787	1.29469e-06	1.12465e-05	0.0688421
CZIB	1788	1.3656e-06	1.18559e-05	0.0881969
BUB3	1789	1.3879e-06	1.20427e-05	0.0846347
TMEM203	1790	1.43642e-06	1.24568e-05	0.0431432
TMEM69	1791	1.44214e-06	1.24993e-05	0.0327971
EIF2S3	1792	1.44829e-06	1.25456e-05	0.13198
CSNK2A2	1793	1.49906e-06	1.29782e-05	0.0717495
QPCT	1794	1.51676e-06	1.31241e-05	0.0274787
PSMD13	1795	1.51955e-06	1.3141e-05	0.107354
PECAM1	1796	1.55347e-06	1.34268e-05	0.0638277
FAH	1797	1.55684e-06	1.34484e-05	0.0655474
RPL23AP7	1798	1.56469e-06	1.35087e-05	0.0299012
PSMC2	1799	1.56731e-06	1.35238e-05	0.0747484
PSMD2	1800	1.56824e-06	1.35243e-05	0.0875521
PDCD2L	1801	1.58844e-06	1.36868e-05	0.0220888
CCDC58	1802	1.58884e-06	1.36868e-05	0.0436362
GIMAP7	1803	1.61678e-06	1.39198e-05	0.0748584
ENDOG	1804	1.61898e-06	1.39309e-05	0.0532173
CDC123	1805	1.62137e-06	1.39438e-05	0.090006
ENSG00000288558	1806	1.64339e-06	1.41253e-05	0.0682953
ANKRD16	1807	1.66359e-06	1.4291e-05	0.0210545
RALA	1808	1.67112e-06	1.43478e-05	0.0725474
PABPC1	1809	1.71486e-06	1.47152e-05	0.268721
PQLC3	1810	1.71914e-06	1.47437e-05	0.0558744
TNFSF10	1811	1.77088e-06	1.51791e-05	0.10008
TMEM254	1812	1.79834e-06	1.5406e-05	0.0253411
PGM2	1813	1.83882e-06	1.57441e-05	0.0774903
ZNF749	1814	1.88795e-06	1.61558e-05	0.0159458
TRIM39-RPP21	1815	1.91854e-06	1.64086e-05	0.0596391
SLC25A5	1816	1.95912e-06	1.67464e-05	0.221199
ACYP2	1817	1.97229e-06	1.68497e-05	0.0846626
POLR2E	1818	1.98396e-06	1.694e-05	0.0817997
ASGR1	1819	2.02336e-06	1.7267e-05	0.0244381
CCDC92	1820	2.04566e-06	1.74477e-05	0.0328728
PLOD1	1821	2.04741e-06	1.7453e-05	0.0419849
ARPIN	1822	2.07562e-06	1.76838e-05	0.0345442
ZFAND1	1823	2.07794e-06	1.76939e-05	0.0542755
RAB4A	1824	2.11634e-06	1.8011e-05	0.0937321
GALK1	1825	2.11943e-06	1.80273e-05	0.0460289
STARD7	1826	2.1431e-06	1.82187e-05	0.0625909
CMC2	1827	2.15574e-06	1.83162e-05	0.0680426
ENTPD3-AS1	1828	2.18687e-06	1.85705e-05	0.0305983
SNF8	1829	2.23995e-06	1.90108e-05	0.0979691
C8orf76	1830	2.28147e-06	1.93526e-05	0.0572928
C19orf38	1831	2.28272e-06	1.93526e-05	0.07779
RAB1A	1832	2.33192e-06	1.9759e-05	0.0910875
IMPA2	1833	2.35222e-06	1.99201e-05	0.0387071
JMJD8	1834	2.36276e-06	1.99984e-05	0.0390862
U2AF1	1835	2.37633e-06	2.01023e-05	0.160915
MFF	1836	2.40801e-06	2.03592e-05	0.0981754
MRPL55	1837	2.45787e-06	2.07695e-05	0.10804
EEF1A1	1838	2.49526e-06	2.10739e-05	0.284609
COX15	1839	2.51126e-06	2.11976e-05	0.018003
NUBP1	1840	2.52503e-06	2.13022e-05	0.0713259
NCS1	1841	2.59239e-06	2.18586e-05	0.0905542
GPI	1842	2.65339e-06	2.23607e-05	0.0418541
HMOX2	1843	2.73685e-06	2.30517e-05	0.0540038
CD93	1844	2.79942e-06	2.35659e-05	0.0592834
TSFM	1845	2.83224e-06	2.38292e-05	0.0178403
PHF11	1846	2.84207e-06	2.38989e-05	0.126412
NOL12	1847	2.85069e-06	2.39585e-05	0.0628786
FOPNL	1848	2.90494e-06	2.44012e-05	0.04663
RPL3P4	1849	2.96367e-06	2.4881e-05	0.114624
B9D2	1850	3.01749e-06	2.53192e-05	0.019744
RPF2	1851	3.09925e-06	2.59912e-05	0.0647145
PGM1	1852	3.1106e-06	2.60723e-05	0.0215269
MCAT	1853	3.13772e-06	2.62854e-05	0.0182345
GLRX2	1854	3.20642e-06	2.68464e-05	0.086937
DYNC1I2P1	1855	3.21148e-06	2.68743e-05	0.0128393
RAB34	1856	3.24062e-06	2.71035e-05	0.0771247
TMEM209	1857	3.24657e-06	2.71386e-05	0.0272639
NUBP2	1858	3.26092e-06	2.7244e-05	0.0669749
SDHAF2	1859	3.27865e-06	2.73773e-05	0.0434043
ELOF1	1860	3.29399e-06	2.74907e-05	0.0380564
SIL1	1861	3.37014e-06	2.81111e-05	0.0766323
FARSA	1862	3.46183e-06	2.88603e-05	0.0480177
SLC25A1	1863	3.48885e-06	2.907e-05	0.050994
MED30	1864	3.56147e-06	2.96592e-05	0.06977
ENSG00000288606	1865	3.58852e-06	2.98684e-05	0.0134141
DHRS4-AS1	1866	3.62938e-06	3.01923e-05	0.031164
STX6	1867	3.68797e-06	3.06633e-05	0.101037
BNIP2	1868	3.70196e-06	3.07631e-05	0.113599
GPAA1	1869	3.71538e-06	3.08581e-05	0.0683618
NUDT9	1870	3.81492e-06	3.16679e-05	0.0624793
RWDD4	1871	3.92688e-06	3.25799e-05	0.047726
NRN1	1872	3.93346e-06	3.26171e-05	0.0221651
EMC4	1873	4.04546e-06	3.35278e-05	0.0879101
TMEM159	1874	4.05049e-06	3.35516e-05	0.0209985
PRNP	1875	4.05378e-06	3.3561e-05	0.127892
SWI5	1876	4.08271e-06	3.37825e-05	0.0284029
PARP1	1877	4.09932e-06	3.39018e-05	0.113323
TMEM33	1878	4.15931e-06	3.43678e-05	0.0761158
APEX1	1879	4.16098e-06	3.43678e-05	0.12648
TMA16	1880	4.1623e-06	3.43678e-05	0.0448902
OTOA	1881	4.1872e-06	3.4555e-05	0.0289406
STK16	1882	4.27379e-06	3.52508e-05	0.0392557
AK2	1883	4.36392e-06	3.59751e-05	0.0909275
PRRG4	1884	4.41443e-06	3.63722e-05	0.083907
DCTN2	1885	4.48068e-06	3.68984e-05	0.0787815
RNASE4	1886	4.52237e-06	3.7222e-05	0.0230877
GLB1	1887	4.54873e-06	3.74191e-05	0.0480921
FNTA	1888	4.62704e-06	3.80432e-05	0.0756728
ARF3	1889	4.71069e-06	3.87105e-05	0.0529114
ANGPTL4	1890	4.73176e-06	3.88606e-05	0.0411739
AC025165.3	1891	4.73397e-06	3.88606e-05	0.0167887
PLIN3	1892	4.76379e-06	3.90847e-05	0.0811227
DUSP4	1893	4.81747e-06	3.95043e-05	0.139153
KIAA1143	1894	4.85063e-06	3.97552e-05	0.063069
TMEM205	1895	4.88983e-06	4.00553e-05	0.0469488
AC004922.1	1896	4.90382e-06	4.01487e-05	0.0576289
EPRS	1897	4.91194e-06	4.0194e-05	0.0622858
ALAD	1898	4.9456e-06	4.04482e-05	0.0375203
HSD17B8	1899	4.99361e-06	4.08193e-05	0.0283881
EPB41L3	1900	5.02645e-06	4.10661e-05	0.107558
CLEC4E	1901	5.13303e-06	4.19148e-05	0.0748398
CIR1	1902	5.20922e-06	4.25145e-05	0.116134
CSNK2A1	1903	5.26256e-06	4.29274e-05	0.0661857
PHGDH	1904	5.36213e-06	4.37166e-05	0.0186563
PTS	1905	5.38758e-06	4.3901e-05	0.0497726
MPV17	1906	5.58384e-06	4.54763e-05	0.0804986
ELOVL1	1907	5.58969e-06	4.55001e-05	0.0709931
REEP3	1908	5.66864e-06	4.61186e-05	0.104797
EIF2S2P4	1909	5.78488e-06	4.70396e-05	0.0237688
CD4	1910	5.79905e-06	4.71302e-05	0.12973
SCIN	1911	5.84703e-06	4.74953e-05	0.199179
FH	1912	5.86085e-06	4.75827e-05	0.0560261
UQCRC1	1913	5.87959e-06	4.77098e-05	0.0624878
WDR18	1914	6.07331e-06	4.9256e-05	0.0233158
CLINT1	1915	6.1071e-06	4.95041e-05	0.123454
IL15RA	1916	6.1198e-06	4.95812e-05	0.022578
ZFAND6	1917	6.16405e-06	4.99137e-05	0.107074
RFT1	1918	6.16785e-06	4.99184e-05	0.0244604
MYCBP	1919	6.1772e-06	4.9968e-05	0.0351902
B3GAT3	1920	6.20378e-06	5.01569e-05	0.0709061
TST	1921	6.22016e-06	5.02632e-05	0.0459594
ARL2BP	1922	6.27179e-06	5.0654e-05	0.061333
ARFGAP3	1923	6.29843e-06	5.08427e-05	0.119077
ZDHHC12	1924	6.33613e-06	5.11204e-05	0.0602156
COMMD3	1925	6.36973e-06	5.13649e-05	0.0718784
RBPJ	1926	6.38905e-06	5.14939e-05	0.160144
ZDHHC4	1927	6.53841e-06	5.26703e-05	0.0505335
PSMG1	1928	6.54557e-06	5.27006e-05	0.0534782
ARMC10	1929	6.5832e-06	5.29761e-05	0.0581684
TOR4A	1930	6.64321e-06	5.34314e-05	0.0571281
EIF2B1	1931	6.6669e-06	5.35942e-05	0.0540425
SNN	1932	6.68946e-06	5.37476e-05	0.0676888
SRA1	1933	6.70885e-06	5.38756e-05	0.0748981
ZNF623	1934	6.78958e-06	5.44957e-05	0.0279617
PEX2	1935	6.8495e-06	5.49482e-05	0.0573953
CST7	1936	6.86044e-06	5.50076e-05	0.0326233
EIF3J	1937	6.9112e-06	5.5386e-05	0.115441
PSME2P2	1938	6.95795e-06	5.57318e-05	0.0132466
DTD1	1939	7.01446e-06	5.61554e-05	0.0595046
FAM129A	1940	7.02167e-06	5.61842e-05	0.0400832
THRAP3	1941	7.03527e-06	5.6264e-05	0.12205
FAM136A	1942	7.06319e-06	5.64582e-05	0.0806381
HMGA1	1943	7.24253e-06	5.78619e-05	0.0910447
PTCRA	1944	7.30976e-06	5.8369e-05	0.0419205
PSMD3	1945	7.50482e-06	5.98958e-05	0.0610585
CNTNAP2	1946	7.51422e-06	5.994e-05	0.0413114
PPP2R1A	1947	7.61233e-06	6.06914e-05	0.0639124
ARHGDIA	1948	7.6747e-06	6.11431e-05	0.152837
GCA	1949	7.67686e-06	6.11431e-05	0.0857572
GSTZ1	1950	7.7405e-06	6.16183e-05	0.0394378
SCARB2	1951	7.83245e-06	6.23184e-05	0.114931
IK	1952	7.85131e-06	6.24364e-05	0.121892
SFXN4	1953	7.90055e-06	6.27958e-05	0.0445661
G6PC3	1954	7.90596e-06	6.28066e-05	0.0531556
MDFIC	1955	7.95056e-06	6.31286e-05	0.0177173
RASGRP3	1956	7.99835e-06	6.34756e-05	0.0932268
GLTP	1957	8.10038e-06	6.42525e-05	0.0452116
CCT5	1958	8.11183e-06	6.43105e-05	0.118413
EXD2	1959	8.12336e-06	6.4369e-05	0.0144847
TAF9	1960	8.13764e-06	6.44493e-05	0.0515985
C3orf14	1961	8.17821e-06	6.47376e-05	0.0385589
YAF2	1962	8.22835e-06	6.51013e-05	0.101649
ADPRHL2	1963	8.24484e-06	6.51985e-05	0.0628234
DHPS	1964	8.25592e-06	6.52529e-05	0.0422107
JKAMP	1965	8.46362e-06	6.68605e-05	0.0643846
MPLKIP	1966	8.71847e-06	6.88387e-05	0.106704
TMEM14A	1967	8.82315e-06	6.96298e-05	0.0474524
JAK1	1968	9.12361e-06	7.19643e-05	0.138969
RXYLT1	1969	9.1711e-06	7.23022e-05	0.0404515
TMPO	1970	9.26432e-06	7.3e-05	0.12483
TMOD3	1971	9.36167e-06	7.37297e-05	0.0895954
PITHD1	1972	9.49311e-06	7.4727e-05	0.0814679
ENOPH1	1973	9.62142e-06	7.56986e-05	0.066793
NELFE	1974	9.63338e-06	7.57543e-05	0.0701954
GDE1	1975	9.70076e-06	7.62455e-05	0.0600201
MRPL39	1976	9.72605e-06	7.64056e-05	0.0453357
BABAM1	1977	9.88672e-06	7.76285e-05	0.0298556
ICMT	1978	9.93357e-06	7.79569e-05	0.0322024
AC010197.2	1979	9.9738e-06	7.82331e-05	0.0134189
AC012254.2	1980	1.00295e-05	7.86301e-05	0.0344118
FBXW5	1981	1.00575e-05	7.88103e-05	0.0698012
LRRC47	1982	1.0403e-05	8.14759e-05	0.0327783
RALB	1983	1.08196e-05	8.4696e-05	0.0608609
COPS7A	1984	1.10579e-05	8.65178e-05	0.0540967
AL132780.3	1985	1.11984e-05	8.75735e-05	0.0316093
NCOA4	1986	1.12887e-05	8.82345e-05	0.0987112
ZMPSTE24	1987	1.16151e-05	9.07403e-05	0.0564682
RPP25L	1988	1.17285e-05	9.15392e-05	0.0376006
MLF2	1989	1.17291e-05	9.15392e-05	0.0976353
TSG101	1990	1.18252e-05	9.22429e-05	0.0474047
NCF2	1991	1.19265e-05	9.29858e-05	0.0811958
PALLD	1992	1.20281e-05	9.37313e-05	0.0281647
AXL	1993	1.21888e-05	9.49354e-05	0.130403
DCAF12	1994	1.22003e-05	9.49778e-05	0.046253
OTOAP1	1995	1.23344e-05	9.59732e-05	0.0233997
MTX2	1996	1.23997e-05	9.64332e-05	0.0492834
GLMP	1997	1.27371e-05	9.90074e-05	0.0357078
TMEM267	1998	1.28743e-05	0.000100024	0.015423
[truncated: 6,414 more rows]

## Sheet: MG_1 periphery vs center
Differentially expressed Genes in MG_1 subcluster Periphery vs Center
GeneId	Symbol	GeneName	log2FC	log2A	P.Value	adj.P.Val
ENSG00000169715	MT1E	MT1E	-1.843	7.20584	1.37392e-07	0.000602877
ENSG00000275395	FCGBP	FCGBP	-1.73107	7.25551	5.58391e-07	0.00122511
ENSG00000115009	CCL20	CCL20	-1.54331	7.56267	2.06962e-05	0.0272599
ENSG00000166920	C15orf48	C15orf48	-1.47036	7.00673	2.48495e-05	0.0272599
ENSG00000287733	AC083862.3	AC083862.3	-1.31245	9.58251	0.000166647	0.121875
ENSG00000113013	HSPA9	HSPA9	-1.29082	8.31346	0.00040611	0.176247
ENSG00000154723	ATP5PF	ATP5PF	-1.24128	6.65228	0.000392068	0.176247
ENSG00000243927	MRPS6	MRPS6	-1.20608	6.22378	0.000481989	0.176247
ENSG00000138449	SLC40A1	SLC40A1	1.1398	6.24837	0.0005919	0.199789
ENSG00000178096	BOLA1	BOLA1	1.25524	6.10099	0.000197031	0.12351
ENSG00000159314	ARHGAP27	ARHGAP27	1.41517	6.90104	0.000472178	0.176247
ENSG00000164056	SPRY1	SPRY1	1.42829	8.9072	0.000274136	0.150363
ENSG00000272333	KMT2B	KMT2B	1.53727	6.96162	0.000146305	0.121875

## Sheet: MG_2 periphery vs center
Differentially expressed Genes in MG_2 subcluster Periphery vs Center
GeneId	Symbol	GeneName	log2FC	log2A	P.Value	adj.P.Val
ENSG00000125144	MT1G	MT1G	-2.64976	7.76464	5.06586e-12	3.30446e-08
ENSG00000115009	CCL20	CCL20	-2.3122	9.16388	5.01217e-07	0.000544906
ENSG00000275395	FCGBP	FCGBP	-1.73661	8.54763	4.95573e-08	0.000161631
ENSG00000149418	ST14	ST14	-1.60501	5.90168	1.76045e-07	0.000347226
ENSG00000100979	PLTP	PLTP	-1.41939	7.83408	3.52349e-05	0.0191531
ENSG00000187608	ISG15	ISG15	-1.3939	9.44831	0.00108289	0.16095
ENSG00000126709	IFI6	IFI6	-1.38064	9.10154	0.000723154	0.149051
ENSG00000177575	CD163	CD163	-1.29675	8.81851	0.000935014	0.16095
ENSG00000124491	F13A1	F13A1	-1.29461	6.0673	0.000654207	0.142246
ENSG00000178726	THBD	THBD	-1.28026	6.16373	7.66447e-06	0.00555504
ENSG00000136040	PLXNC1	PLXNC1	-1.22729	5.95714	1.57494e-05	0.0102733
ENSG00000105697	HAMP	HAMP	-1.21642	9.38655	0.000414187	0.10807
ENSG00000125810	CD93	CD93	-1.135	5.81905	1.80895e-05	0.0107271
ENSG00000117984	CTSD	CTSD	-1.13424	8.86067	0.000777523	0.14917
ENSG00000136689	IL1RN	IL1RN	-1.07996	8.07465	0.000557777	0.129942
ENSG00000185201	IFITM2	IFITM2	-1.07653	8.62455	0.000962581	0.16095
ENSG00000164611	PTTG1	PTTG1	-1.02701	6.33803	0.000231827	0.07959
ENSG00000115415	STAT1	STAT1	-1.02373	6.51294	0.00082401	0.149306
ENSG00000117632	STMN1	STMN1	-1.00348	7.79058	0.00149304	0.187532
ENSG00000138646	HERC5	HERC5	-0.98069	6.91605	0.00100777	0.16095
ENSG00000131370	SH3BP5	SH3BP5	-0.9661	6.16828	0.000953592	0.16095
ENSG00000100504	PYGL	PYGL	-0.964426	6.33311	0.000807705	0.149306
ENSG00000176046	NUPR1	NUPR1	-0.963985	7.43813	0.000587885	0.132234
ENSG00000139410	SDSL	SDSL	-0.918721	5.81123	0.00107532	0.16095
ENSG00000088827	SIGLEC1	SIGLEC1	-0.893922	5.50819	0.00116506	0.161695
ENSG00000137814	HAUS2	HAUS2	-0.833953	5.14373	0.000766156	0.14917
ENSG00000138758	SEPT11	SEPT11	-0.821976	5.12149	0.00126826	0.169052
ENSG00000222041	CYTOR	CYTOR	-0.780248	5.01681	0.00150777	0.187532
ENSG00000171617	ENC1	ENC1	0.797858	5.32926	0.00152371	0.187532
ENSG00000173898	SPTBN2	SPTBN2	0.808004	5.2171	0.00113501	0.16095
ENSG00000204241	AP000911.1	AP000911.1	0.832331	4.88625	0.000479309	0.120251
ENSG00000265100	AC005332.1	AC005332.1	0.91516	5.67894	0.00113364	0.16095
ENSG00000152270	PDE3B	PDE3B	0.915703	7.03607	0.0012699	0.169052
ENSG00000180596	HIST1H2BC	HIST1H2BC	0.949668	5.79544	0.0010817	0.16095
ENSG00000169087	HSPBAP1	HSPBAP1	0.950361	5.53992	0.000398676	0.10807
ENSG00000220323	HIST2H2BD	HIST2H2BD	0.992015	5.83151	0.00148871	0.187532
ENSG00000101463	SYNDIG1	SYNDIG1	1.01359	6.83134	0.000290246	0.0889164
ENSG00000203709	MIR29B2CHG	MIR29B2CHG	1.01753	7.14094	0.000401481	0.10807
ENSG00000146090	RASGEF1C	RASGEF1C	1.02182	6.41416	0.000245895	0.0801988
ENSG00000273802	HIST1H2BG	HIST1H2BG	1.02711	6.17105	0.000503277	0.121588
ENSG00000179388	EGR3	EGR3	1.04929	8.72335	0.000731203	0.149051
ENSG00000184678	HIST2H2BE	HIST2H2BE	1.05302	6.19496	0.000191978	0.0695708
ENSG00000278002	AL627171.1	AL627171.1	1.08766	7.05744	9.94337e-05	0.0406927
ENSG00000230806	SRGAP2-AS1	SRGAP2-AS1	1.13005	5.27514	3.20902e-06	0.00261655
ENSG00000136527	TRA2B	TRA2B	1.18117	9.51213	0.00110385	0.16095
ENSG00000265206	AC004687.1	AC004687.1	1.19471	7.70511	9.98134e-05	0.0406927
ENSG00000157240	FZD1	FZD1	1.21637	5.55401	0.000299887	0.0889164
ENSG00000184068	SREBF2-AS1	SREBF2-AS1	1.22958	6.57248	0.000172403	0.0661519
ENSG00000164056	SPRY1	SPRY1	1.27334	8.02952	4.01944e-05	0.0201683
ENSG00000282988	AL031777.3	AL031777.3	1.28898	6.24259	7.94316e-05	0.0370095
ENSG00000073737	DHRS9	DHRS9	1.41029	6.69169	3.21327e-07	0.000419203
ENSG00000224363	FP700111.1	FP700111.1	1.41725	6.25332	2.69311e-06	0.00250959
ENSG00000132744	ACY3	ACY3	1.76803	7.05755	2.12924e-07	0.000347226

## Sheet: Differential abundance
Differential abundance testing of MG subsets among total Microglia using limma voom
cluster_id	logFC	AveExpr	t	p_val	p_adj	B
MG_1	1.39112	17.5338	6.52984	1.33456e-05	2.66912e-05	14.2406
MG_2	-0.691197	19.4429	-4.34423	0.000673451	0.000673451	2.24823
