# Supplementary material for: Single-cell characterization of human GBM reveals regional differences in tumor-infiltrating leukocyte activation
Source: eLife. 2023 Dec 21;12:RP92678. doi: 10.7554/eLife.92678 (PMC10735226; doi:10.7554/eLife.92678)
Supplement: Supplementary file 6. [file elife-92678-supp6.xlsx]

## Sheet: B-cells
Significantly differentially expressed Genes in B-cell cluster Periphery vs PBMC
GeneId	Symbol	GeneName	log2FC	log2A	P.Value	adj.P.Val
ENSG00000204388	HSPA1B	HSPA1B	4.86385	9.84547	5.25794e-22	3.31408e-18
ENSG00000123358	NR4A1	NR4A1	3.88809	8.00915	1.06445e-18	2.2364e-15
ENSG00000095794	CREM	CREM	3.68889	7.9934	9.18064e-21	2.89328e-17
ENSG00000158050	DUSP2	DUSP2	3.47821	8.83054	1.35887e-15	2.14123e-12
ENSG00000112149	CD83	CD83	3.36464	9.98549	1.08792e-09	6.23378e-07
ENSG00000130844	ZNF331	ZNF331	3.12236	8.65379	3.44921e-13	3.62339e-10
ENSG00000153234	NR4A2	NR4A2	2.89197	8.741	2.64787e-10	1.66895e-07
ENSG00000106211	HSPB1	HSPB1	2.64433	8.43295	1.36707e-08	6.15476e-06
ENSG00000283293	RN7SK	RN7SK	2.35491	6.21338	1.62433e-12	1.46259e-09
ENSG00000059804	SLC2A3	SLC2A3	2.343	7.52974	5.60444e-09	2.71729e-06
ENSG00000202198	RF00100	RF00100	2.34202	6.22003	1.92396e-12	1.51584e-09
ENSG00000155307	SAMSN1	SAMSN1	2.33008	7.0964	1.89244e-09	9.94004e-07
ENSG00000116741	RGS2	RGS2	2.26375	8.87964	8.1514e-06	0.0019029
ENSG00000136603	SKIL	SKIL	2.11656	7.33335	1.1042e-07	3.86653e-05
ENSG00000115541	HSPE1	HSPE1	2.10838	9.79976	1.97291e-06	0.000497411
ENSG00000140379	BCL2A1	BCL2A1	2.07128	7.98355	6.44777e-07	0.000184729
ENSG00000086061	DNAJA1	DNAJA1	2.06988	9.59123	1.47456e-05	0.00309805
ENSG00000216490	IFI30	IFI30	2.06339	7.73725	8.64415e-06	0.00194294
ENSG00000100644	HIF1A	HIF1A	1.97854	7.05582	1.23327e-07	4.09122e-05
ENSG00000102393	GLA	GLA	1.97549	6.56728	2.76935e-07	8.312e-05
ENSG00000163659	TIPARP	TIPARP	1.96563	6.82059	8.47368e-08	3.14174e-05
ENSG00000116717	GADD45A	GADD45A	1.95673	7.11962	2.4798e-07	7.81509e-05
ENSG00000132510	KDM6B	KDM6B	1.94392	8.20137	3.20332e-05	0.0059384
ENSG00000178381	ZFAND2A	ZFAND2A	1.88946	6.76425	2.28617e-05	0.00453946
ENSG00000123975	CKS2	CKS2	1.85161	7.59163	0.000126422	0.0153239
ENSG00000117318	ID3	ID3	1.83069	7.59782	8.81089e-05	0.0120728
ENSG00000138670	RASGEF1B	RASGEF1B	1.79087	6.43583	1.44141e-06	0.000378551
ENSG00000144655	CSRNP1	CSRNP1	1.78878	6.6708	8.93943e-06	0.00194294
ENSG00000175197	DDIT3	DDIT3	1.76653	7.55966	2.30466e-05	0.00453946
ENSG00000108106	UBE2S	UBE2S	1.76221	8.00162	4.15675e-05	0.00694416
ENSG00000120694	HSPH1	HSPH1	1.73424	7.54423	0.000138296	0.0161422
ENSG00000162924	REL	REL	1.66199	10.0621	0.000310206	0.0274422
ENSG00000107968	MAP3K8	MAP3K8	1.64075	7.8737	0.00010123	0.0134792
ENSG00000144381	HSPD1	HSPD1	1.63963	9.37516	0.000259614	0.0268254
ENSG00000185885	IFITM1	IFITM1	1.61902	6.98609	3.4625e-05	0.00606227
ENSG00000116752	BCAS2	BCAS2	1.6114	8.04309	0.000219779	0.0234791
ENSG00000141543	EIF4A3	EIF4A3	1.59868	7.74945	0.000134735	0.0160233
ENSG00000161835	GRASP	GRASP	1.59596	8.05483	0.000303059	0.0274422
ENSG00000196352	CD55	CD55	1.54578	7.88391	0.000628615	0.0455918
ENSG00000051108	HERPUD1	HERPUD1	1.54117	10.6271	0.000305254	0.0274422
ENSG00000113811	SELENOK	SELENOK	1.52124	8.84423	0.000487818	0.0379595
ENSG00000188486	H2AFX	H2AFX	1.51934	6.93138	4.56031e-05	0.00737017
ENSG00000232956	SNHG15	SNHG15	1.51795	7.94995	0.000361219	0.0301047
ENSG00000118503	TNFAIP3	TNFAIP3	1.5075	7.12399	0.000104681	0.0134792
ENSG00000167604	NFKBID	NFKBID	1.48908	7.34105	0.000705126	0.0488396
ENSG00000164169	PRMT9	PRMT9	1.48638	6.26513	4.18655e-05	0.00694416
ENSG00000167553	TUBA1C	TUBA1C	1.48372	6.82044	0.000104789	0.0134792
ENSG00000109320	NFKB1	NFKB1	1.4832	7.31525	0.000164298	0.0188285
ENSG00000162734	PEA15	PEA15	1.47005	6.59713	0.000313476	0.0274422
ENSG00000177426	TGIF1	TGIF1	1.45162	6.56585	0.000301481	0.0274422
ENSG00000154640	BTG3	BTG3	1.45027	6.21394	5.69773e-05	0.00875922
ENSG00000197019	SERTAD1	SERTAD1	1.44077	7.54221	0.000347762	0.0296209
ENSG00000196428	TSC22D2	TSC22D2	1.43973	6.3599	4.91576e-05	0.00774601
ENSG00000165169	DYNLT3	DYNLT3	1.42642	6.28327	7.53862e-05	0.0110502
ENSG00000176845	METRNL	METRNL	1.41474	6.24551	0.000469032	0.0369539
ENSG00000169504	CLIC4	CLIC4	1.39363	6.1461	0.000304332	0.0274422
ENSG00000155090	KLF10	KLF10	1.38465	6.2034	7.79316e-05	0.0111637
ENSG00000132661	NXT1	NXT1	1.38336	7.18444	0.000311884	0.0274422
ENSG00000105835	NAMPT	NAMPT	1.36049	6.63589	0.000192711	0.0216904
ENSG00000151327	FAM177A1	FAM177A1	1.35733	7.00996	0.00073682	0.0499374
ENSG00000268173	AC007192.1	AC007192.1	1.33723	6.27023	0.000362995	0.0301047
ENSG00000141232	TOB1	TOB1	1.32653	6.33829	0.000371359	0.0303984
ENSG00000147872	PLIN2	PLIN2	1.29726	6.15545	0.000273471	0.0273601
ENSG00000131759	RARA	RARA	1.28278	5.78027	0.000414616	0.03308
ENSG00000165997	ARL5B	ARL5B	1.26702	5.84637	0.000602439	0.0451427
ENSG00000121931	LRIF1	LRIF1	1.24198	6.44265	0.000514383	0.0395385
ENSG00000170340	B3GNT2	B3GNT2	1.22949	6.20611	0.000608779	0.0451427
ENSG00000105755	ETHE1	ETHE1	1.22584	6.45041	0.000673114	0.0476701
ENSG00000138166	DUSP5	DUSP5	1.19978	6.18543	0.000629302	0.0455918
ENSG00000071575	TRIB2	TRIB2	-1.09048	5.1231	0.000698884	0.0488396
ENSG00000230438	SERPINB9P1	SERPINB9P1	-1.22092	5.30247	0.000296512	0.0274422
ENSG00000105726	ATP13A1	ATP13A1	-1.22778	5.41148	0.00032357	0.0279379
ENSG00000135318	NT5E	NT5E	-1.25567	5.25171	0.000218698	0.0234791
ENSG00000100027	YPEL1	YPEL1	-1.27787	5.43688	0.000227621	0.0239116
ENSG00000061273	HDAC7	HDAC7	-1.3633	5.46481	0.000123769	0.0152964
ENSG00000262655	SPON1	SPON1	-1.36549	5.46805	0.0001226	0.0152964
ENSG00000224505	AC138150.1	AC138150.1	-1.36691	5.74466	0.000713567	0.0488871
ENSG00000230006	ANKRD36BP2	ANKRD36BP2	-1.37433	5.64383	0.000650959	0.0466249
ENSG00000160602	AC010761.1	AC010761.1	-1.40928	5.89985	0.000556039	0.0422255
ENSG00000198520	ARMH1	ARMH1	-1.55944	6.36874	0.000310347	0.0274422
ENSG00000241743	XACT	XACT	-1.56299	5.8679	0.000203997	0.0225578
ENSG00000261040	WFDC21P	WFDC21P	-1.59725	6.87853	0.000384197	0.0310461
ENSG00000110876	SELPLG	SELPLG	-1.6286	6.53591	2.4879e-05	0.00475188
ENSG00000160710	ADAR	ADAR	-1.67181	7.05274	0.000268903	0.027337
ENSG00000138867	GUCD1	GUCD1	-1.78093	7.00297	8.25437e-05	0.0115616
ENSG00000125910	S1PR4	S1PR4	-1.90999	7.70746	6.18265e-05	0.00927839
ENSG00000100721	TCL1A	TCL1A	-2.11279	9.58485	3.4293e-05	0.00606227
ENSG00000239264	TXNDC5	TXNDC5	-2.31482	7.86724	3.94788e-06	0.000957056
ENSG00000170476	MZB1	MZB1	-2.44797	8.5913	7.0054e-07	0.000191978
ENSG00000132465	JCHAIN	JCHAIN	-2.78109	10.2042	3.82295e-08	1.6064e-05
ENSG00000211896	IGHG1	IGHG1	-2.93488	10.4649	6.27402e-08	2.47157e-05
ENSG00000211893	IGHG2	IGHG2	-3.98141	10.1096	7.7147e-11	5.40286e-08
ENSG00000254709	IGLL5	IGLL5	-4.03602	11.8346	1.90126e-14	2.39673e-11

## Sheet: CD4+ T-cells
Significantly differentially expressed Genes in CD4+ T-cell cluster Periphery vs PBMC
GeneId	Symbol	GeneName	log2FC	log2A	P.Value	adj.P.Val
ENSG00000095794	CREM	CREM	5.57933	10.2008	8.78444e-88	5.10025e-84
ENSG00000101665	SMAD7	SMAD7	3.56915	7.50885	8.15392e-84	2.36708e-80
ENSG00000204388	HSPA1B	HSPA1B	8.40746	10.7408	2.42184e-76	4.68707e-73
ENSG00000116741	RGS2	RGS2	3.70853	7.80602	6.12618e-69	8.89215e-66
ENSG00000130844	ZNF331	ZNF331	3.6856	9.01778	5.99819e-62	6.9651e-59
ENSG00000108106	UBE2S	UBE2S	2.91688	8.5433	4.1793e-53	4.04416e-50
ENSG00000158050	DUSP2	DUSP2	3.69979	9.87801	2.98467e-52	2.47557e-49
ENSG00000203812	HIST2H2AA3	HIST2H2AA3	3.25664	7.84697	3.86891e-52	2.80786e-49
ENSG00000272196	HIST2H2AA4	HIST2H2AA4	3.25782	7.84915	5.21725e-52	3.36571e-49
ENSG00000164674	SYTL3	SYTL3	2.27497	7.30477	1.39246e-44	8.0846e-42
ENSG00000160789	LMNA	LMNA	2.93596	6.86809	3.61562e-44	1.90839e-41
ENSG00000102760	RGCC	RGCC	2.88632	9.4463	9.21298e-44	4.45755e-41
ENSG00000151327	FAM177A1	FAM177A1	3.16269	8.78765	5.04836e-43	2.25468e-40
ENSG00000155307	SAMSN1	SAMSN1	3.17008	8.53171	8.92538e-43	3.70148e-40
ENSG00000164169	PRMT9	PRMT9	2.28516	6.92934	4.67399e-42	1.80915e-39
ENSG00000175197	DDIT3	DDIT3	2.64047	6.87563	3.25102e-41	1.17971e-38
ENSG00000139112	GABARAPL1	GABARAPL1	2.94959	7.19053	3.92673e-41	1.34109e-38
ENSG00000059804	SLC2A3	SLC2A3	2.76537	8.31752	6.32535e-41	2.04028e-38
ENSG00000134480	CCNH	CCNH	2.17845	7.66377	2.53335e-40	7.74138e-38
ENSG00000117036	ETV3	ETV3	3.00313	6.40038	5.33975e-38	1.55013e-35
ENSG00000159388	BTG2	BTG2	2.13652	9.47825	7.6976e-37	2.1282e-34
ENSG00000188229	TUBB4B	TUBB4B	2.30308	8.79265	4.75298e-36	1.25435e-33
ENSG00000168209	DDIT4	DDIT4	1.979	10.1936	1.00492e-35	2.53676e-33
ENSG00000183508	TENT5C	TENT5C	3.00948	7.13406	4.53075e-35	1.09606e-32
ENSG00000006652	IFRD1	IFRD1	2.19461	7.01799	3.16696e-34	7.35495e-32
ENSG00000163659	TIPARP	TIPARP	2.36094	7.69352	5.75495e-34	1.28512e-31
ENSG00000113448	PDE4D	PDE4D	2.65013	7.14441	1.00877e-33	2.16922e-31
ENSG00000184588	PDE4B	PDE4B	2.4087	8.02708	3.18362e-33	6.60146e-31
ENSG00000161835	GRASP	GRASP	2.85569	6.6302	1.12088e-32	2.24409e-30
ENSG00000169895	SYAP1	SYAP1	2.0961	7.86904	1.29699e-32	2.51011e-30
ENSG00000120694	HSPH1	HSPH1	2.8776	7.90275	1.59844e-32	2.99371e-30
ENSG00000144655	CSRNP1	CSRNP1	3.04811	7.38852	6.28395e-32	1.12199e-29
ENSG00000197019	SERTAD1	SERTAD1	2.51443	8.04599	6.37712e-32	1.12199e-29
ENSG00000070495	JMJD6	JMJD6	2.06095	5.81794	3.65165e-31	6.23573e-29
ENSG00000113811	SELENOK	SELENOK	2.13967	9.47428	1.14569e-30	1.90053e-28
ENSG00000162924	REL	REL	2.72401	8.71027	5.32871e-30	8.59402e-28
ENSG00000167470	MIDN	MIDN	2.33618	7.17329	1.03518e-29	1.62439e-27
ENSG00000235576	LINC01871	LINC01871	2.64879	7.91528	1.16382e-28	1.77819e-26
ENSG00000141682	PMAIP1	PMAIP1	2.68106	7.95101	1.75584e-27	2.61394e-25
ENSG00000196352	CD55	CD55	2.23196	8.16547	2.21626e-27	3.2169e-25
ENSG00000139722	VPS37B	VPS37B	2.40333	5.69632	2.43017e-27	3.44135e-25
ENSG00000116044	NFE2L2	NFE2L2	1.93956	6.67504	3.32987e-27	4.60315e-25
ENSG00000095380	NANS	NANS	1.80099	6.32763	3.53067e-27	4.76723e-25
ENSG00000138767	CNOT6L	CNOT6L	1.60077	8.8134	4.7989e-27	6.33237e-25
ENSG00000188486	H2AFX	H2AFX	2.31413	7.23429	1.86781e-26	2.40989e-24
ENSG00000086061	DNAJA1	DNAJA1	2.92091	9.7585	4.91616e-26	6.20505e-24
ENSG00000271503	CCL5	CCL5	2.00296	10.0318	1.41756e-25	1.75114e-23
ENSG00000044574	HSPA5	HSPA5	1.6402	9.42094	4.98071e-25	6.02458e-23
ENSG00000051108	HERPUD1	HERPUD1	1.89505	8.97375	2.32043e-23	2.74947e-21
ENSG00000077984	CST7	CST7	1.95792	7.82892	6.46897e-23	7.51177e-21
ENSG00000153234	NR4A2	NR4A2	3.16146	8.77817	8.57266e-23	9.75938e-21
ENSG00000137575	SDCBP	SDCBP	1.52892	8.08549	1.35889e-21	1.51725e-19
ENSG00000255112	CHMP1B	CHMP1B	1.97353	7.31663	3.14771e-21	3.38437e-19
ENSG00000105835	NAMPT	NAMPT	1.96886	6.32441	3.1311e-21	3.38437e-19
ENSG00000092820	EZR	EZR	2.07384	9.15612	5.58029e-21	5.89076e-19
ENSG00000196428	TSC22D2	TSC22D2	2.1067	6.07585	7.73126e-21	8.01566e-19
ENSG00000069849	ATP1B3	ATP1B3	2.75566	8.50368	1.19317e-20	1.21535e-18
ENSG00000134333	LDHA	LDHA	1.64437	9.8142	4.32469e-20	4.32916e-18
ENSG00000114541	FRMD4B	FRMD4B	2.94605	6.53699	8.76504e-20	8.62539e-18
ENSG00000034677	RNF19A	RNF19A	1.68904	8.08436	1.23657e-19	1.19659e-17
ENSG00000134294	SLC38A2	SLC38A2	1.98924	7.05627	1.31601e-19	1.23238e-17
ENSG00000055483	AC022966.1	AC022966.1	1.69782	6.32191	1.3024e-19	1.23238e-17
ENSG00000171522	PTGER4	PTGER4	1.74142	8.31088	1.40684e-19	1.29652e-17
ENSG00000086619	ERO1B	ERO1B	1.49015	6.36917	1.85711e-19	1.68475e-17
ENSG00000154640	BTG3	BTG3	2.24072	6.76033	2.06811e-19	1.8473e-17
ENSG00000020633	RUNX3	RUNX3	1.54321	8.06428	2.51143e-19	2.2093e-17
ENSG00000143384	MCL1	MCL1	1.71134	9.44429	2.88533e-19	2.50033e-17
ENSG00000107372	ZFAND5	ZFAND5	1.75795	7.76248	3.43183e-19	2.93018e-17
ENSG00000128016	ZFP36	ZFP36	2.72912	10.1224	4.40542e-19	3.70694e-17
ENSG00000213639	PPP1CB	PPP1CB	1.59053	8.13768	1.07097e-18	8.88296e-17
ENSG00000267519	AC020916.1	AC020916.1	1.98216	7.64401	3.18343e-18	2.60324e-16
ENSG00000169499	PLEKHA2	PLEKHA2	1.49098	5.64739	3.71753e-18	2.99777e-16
ENSG00000126860	EVI2A	EVI2A	1.70871	6.91432	4.01179e-18	3.19075e-16
ENSG00000116717	GADD45A	GADD45A	2.92942	8.07455	5.73132e-18	4.49676e-16
ENSG00000126804	ZBTB1	ZBTB1	1.44341	7.09471	1.32805e-17	1.02809e-15
ENSG00000104660	LEPROTL1	LEPROTL1	1.43983	8.96726	1.91856e-17	1.46568e-15
ENSG00000186834	HEXIM1	HEXIM1	1.83306	6.64908	2.24804e-17	1.69508e-15
ENSG00000119801	YPEL5	YPEL5	1.98125	9.40142	2.56644e-17	1.91035e-15
ENSG00000285976	AL135905.2	AL135905.2	1.92009	6.0773	5.37619e-17	3.95116e-15
ENSG00000173114	LRRN3	LRRN3	-2.61798	5.41018	7.53123e-17	5.46579e-15
ENSG00000196843	ARID5A	ARID5A	1.54069	7.0057	8.64489e-17	6.19657e-15
ENSG00000100425	BRD1	BRD1	1.33067	6.98659	3.51784e-16	2.4908e-14
ENSG00000135046	ANXA1	ANXA1	1.40884	10.6056	4.08286e-16	2.85604e-14
ENSG00000145675	PIK3R1	PIK3R1	1.34956	9.57669	9.4976e-16	6.56465e-14
ENSG00000232956	SNHG15	SNHG15	1.6386	7.95881	1.24994e-15	8.5378e-14
ENSG00000152409	JMY	JMY	1.65181	7.05455	1.26561e-15	8.54435e-14
ENSG00000152518	ZFP36L2	ZFP36L2	1.24024	11.9965	1.54889e-15	1.03366e-13
ENSG00000112245	PTP4A1	PTP4A1	1.8792	6.03223	1.74246e-15	1.14963e-13
ENSG00000204386	NEU1	NEU1	2.36212	6.34384	2.04235e-15	1.33235e-13
ENSG00000129657	SEC14L1	SEC14L1	1.3692	5.7667	2.23665e-15	1.44289e-13
ENSG00000174373	RALGAPA1	RALGAPA1	1.58278	6.50483	7.83557e-15	4.99927e-13
ENSG00000163600	ICOS	ICOS	1.98448	6.92204	1.47318e-14	9.29064e-13
ENSG00000168003	SLC3A2	SLC3A2	1.30592	8.19203	1.48817e-14	9.29064e-13
ENSG00000106133	NSUN5P2	NSUN5P2	-2.02618	5.5613	1.59107e-14	9.82739e-13
ENSG00000110852	CLEC2B	CLEC2B	1.37829	8.73385	1.63662e-14	1.00024e-12
ENSG00000101695	RNF125	RNF125	1.38708	6.18409	1.76058e-14	1.06478e-12
ENSG00000116752	BCAS2	BCAS2	1.66607	8.36928	2.08776e-14	1.24964e-12
ENSG00000115539	PDCL3	PDCL3	1.99518	7.53971	3.32907e-14	1.9723e-12
ENSG00000081320	STK17B	STK17B	1.1087	9.76979	3.6726e-14	2.15385e-12
ENSG00000123975	CKS2	CKS2	3.63176	7.00991	7.73834e-14	4.49288e-12
ENSG00000142178	SIK1	SIK1	2.30789	5.94523	9.30638e-14	5.34978e-12
ENSG00000204569	PPP1R10	PPP1R10	1.22081	8.0591	1.11565e-13	6.35047e-12
ENSG00000138378	STAT4	STAT4	1.26241	6.5911	1.27799e-13	7.20391e-12
ENSG00000141543	EIF4A3	EIF4A3	2.12519	7.44112	1.50456e-13	8.3995e-12
ENSG00000132510	KDM6B	KDM6B	1.97951	7.2421	1.58587e-13	8.76913e-12
ENSG00000125772	GPCPD1	GPCPD1	1.26941	6.89733	1.9062e-13	1.04409e-11
ENSG00000169871	TRIM56	TRIM56	-1.7335	6.82913	1.93596e-13	1.05049e-11
ENSG00000067064	IDI1	IDI1	1.60693	7.77262	1.97047e-13	1.05931e-11
ENSG00000140941	MAP1LC3B	MAP1LC3B	1.37237	8.61065	2.06433e-13	1.09959e-11
ENSG00000078589	P2RY10	P2RY10	1.39509	7.22023	3.17296e-13	1.67474e-11
ENSG00000122557	HERPUD2	HERPUD2	1.2997	7.72449	4.76057e-13	2.49008e-11
ENSG00000265241	RBM8A	RBM8A	1.11442	8.70202	5.21273e-13	2.70224e-11
ENSG00000008083	JARID2	JARID2	1.33726	6.3483	5.35574e-13	2.75181e-11
ENSG00000101901	ALG13	ALG13	1.50916	6.64353	5.46537e-13	2.7835e-11
ENSG00000105329	TGFB1	TGFB1	1.15063	7.74646	1.05569e-12	5.32985e-11
ENSG00000198355	PIM3	PIM3	1.44609	7.04178	1.13376e-12	5.62615e-11
ENSG00000135541	AHI1	AHI1	1.29117	5.84665	1.13168e-12	5.62615e-11
ENSG00000112096	SOD2	SOD2	1.54496	7.64294	1.4479e-12	7.12418e-11
ENSG00000275993	SIK1B	SIK1B	2.3547	6.08162	1.51209e-12	7.37745e-11
ENSG00000143924	EML4	EML4	1.19582	8.12807	2.34175e-12	1.13302e-10
ENSG00000106829	TLE4	TLE4	1.3145	7.50816	2.68801e-12	1.2898e-10
ENSG00000104671	DCTN6	DCTN6	1.32144	5.91898	3.28902e-12	1.56525e-10
ENSG00000140030	GPR65	GPR65	1.37913	7.14898	6.16481e-12	2.90999e-10
ENSG00000179119	SPTY2D1	SPTY2D1	1.73232	6.70274	7.15565e-12	3.32366e-10
ENSG00000111276	CDKN1B	CDKN1B	1.17162	8.35929	7.129e-12	3.32366e-10
ENSG00000178381	ZFAND2A	ZFAND2A	2.23711	7.09238	7.93896e-12	3.65822e-10
ENSG00000197451	HNRNPAB	HNRNPAB	1.43825	7.87154	8.15966e-12	3.73031e-10
ENSG00000170222	ADPRM	ADPRM	-1.5287	6.56796	9.01231e-12	4.08793e-10
ENSG00000167553	TUBA1C	TUBA1C	1.87822	6.2852	9.18599e-12	4.13441e-10
ENSG00000138757	G3BP2	G3BP2	1.10074	8.32285	9.62322e-12	4.29788e-10
ENSG00000120705	ETF1	ETF1	1.49327	6.51612	1.04139e-11	4.61552e-10
ENSG00000231721	LINC-PINT	LINC-PINT	1.23576	6.78897	1.67387e-11	7.3625e-10
ENSG00000167460	TPM4	TPM4	1.6641	7.58911	1.79788e-11	7.84847e-10
ENSG00000282885	AL627171.2	AL627171.2	1.68635	4.14474	1.82897e-11	7.91478e-10
ENSG00000224505	AC138150.1	AC138150.1	-1.70081	5.75718	1.84033e-11	7.91478e-10
ENSG00000153283	CD96	CD96	1.10564	7.07337	2.37342e-11	1.01324e-09
ENSG00000185697	MYBL1	MYBL1	1.53067	6.58197	2.80222e-11	1.18757e-09
ENSG00000157933	SKI	SKI	1.23474	6.16458	2.93628e-11	1.23536e-09
ENSG00000183484	GPR132	GPR132	1.19725	5.64948	3.13955e-11	1.31138e-09
ENSG00000115541	HSPE1	HSPE1	2.1675	9.91423	3.81081e-11	1.5804e-09
ENSG00000280138	AC027290.2	AC027290.2	1.60661	6.33517	4.45712e-11	1.8224e-09
ENSG00000179029	TMEM107	TMEM107	1.20467	6.15968	4.4403e-11	1.8224e-09
ENSG00000103342	GSPT1	GSPT1	1.22186	7.91495	4.67596e-11	1.8985e-09
ENSG00000119669	IRF2BPL	IRF2BPL	1.3277	5.6247	5.68468e-11	2.29203e-09
ENSG00000131871	SELENOS	SELENOS	1.16607	7.15597	6.11745e-11	2.44951e-09
ENSG00000228253	MT-ATP8	MT-ATP8	1.18233	7.58905	8.5612e-11	3.40454e-09
ENSG00000145649	GZMA	GZMA	1.63207	8.42812	9.69954e-11	3.83099e-09
ENSG00000177383	MAGEF1	MAGEF1	-1.77587	5.59587	1.07315e-10	4.20992e-09
ENSG00000197989	SNHG12	SNHG12	1.05449	7.95859	1.10791e-10	4.30502e-09
ENSG00000279833	AL031846.2	AL031846.2	-1.67988	5.23165	1.11222e-10	4.30502e-09
ENSG00000146278	PNRC1	PNRC1	0.985916	10.9495	1.12275e-10	4.317e-09
ENSG00000105993	DNAJB6	DNAJB6	1.56064	7.46851	1.19209e-10	4.52955e-09
ENSG00000184205	TSPYL2	TSPYL2	1.51128	7.30845	1.19363e-10	4.52955e-09
ENSG00000163162	RNF149	RNF149	1.10186	6.60703	1.20875e-10	4.55715e-09
ENSG00000119820	YIPF4	YIPF4	-1.25249	7.43149	1.24312e-10	4.6565e-09
ENSG00000164687	FABP5	FABP5	1.87126	6.3263	1.36825e-10	5.09235e-09
ENSG00000027869	SH2D2A	SH2D2A	1.64137	6.46123	1.48508e-10	5.49197e-09
ENSG00000156675	RAB11FIP1	RAB11FIP1	1.55534	6.93667	1.64236e-10	6.03515e-09
ENSG00000185650	ZFP36L1	ZFP36L1	1.46462	8.19853	1.70335e-10	6.21989e-09
ENSG00000137947	GTF2B	GTF2B	1.22669	7.25053	1.86519e-10	6.73629e-09
ENSG00000165732	DDX21	DDX21	1.07568	8.66081	1.86797e-10	6.73629e-09
ENSG00000164032	H2AFZ	H2AFZ	1.20554	9.50415	2.04203e-10	7.31854e-09
ENSG00000177426	TGIF1	TGIF1	1.52473	6.57219	2.06267e-10	7.34715e-09
ENSG00000164543	STK17A	STK17A	1.3198	8.89852	3.18268e-10	1.12674e-08
ENSG00000186891	TNFRSF18	TNFRSF18	1.86346	6.36583	3.58942e-10	1.26304e-08
ENSG00000009790	TRAF3IP3	TRAF3IP3	-1.08778	8.76254	3.71778e-10	1.30033e-08
ENSG00000132424	PNISR	PNISR	-1.10125	9.8648	4.19695e-10	1.45913e-08
ENSG00000235532	LINC00402	LINC00402	-1.62048	5.77823	4.77724e-10	1.65099e-08
ENSG00000164105	SAP30	SAP30	2.00917	6.52754	4.88202e-10	1.67722e-08
ENSG00000115486	GGCX	GGCX	1.14968	4.94036	5.13755e-10	1.75463e-08
ENSG00000118515	SGK1	SGK1	2.12809	6.83903	6.0575e-10	2.05671e-08
ENSG00000111653	ING4	ING4	-1.38554	6.25418	6.30795e-10	2.1293e-08
ENSG00000010404	IDS	IDS	1.18993	7.82345	7.44886e-10	2.49989e-08
ENSG00000143514	TP53BP2	TP53BP2	1.18065	5.62338	7.51711e-10	2.5083e-08
ENSG00000100644	HIF1A	HIF1A	1.2137	5.9567	7.62865e-10	2.53097e-08
ENSG00000027697	IFNGR1	IFNGR1	1.62273	6.56129	8.17422e-10	2.69656e-08
ENSG00000171867	PRNP	PRNP	1.05558	6.75651	8.67675e-10	2.84617e-08
ENSG00000135821	GLUL	GLUL	1.48632	6.80109	9.15715e-10	2.98688e-08
ENSG00000153922	CHD1	CHD1	1.28522	8.04233	9.80701e-10	3.18098e-08
ENSG00000188042	ARL4C	ARL4C	1.09367	10.5986	9.86506e-10	3.18203e-08
ENSG00000150977	RILPL2	RILPL2	1.54793	7.8668	1.13174e-09	3.61038e-08
ENSG00000279369	AC046185.3	AC046185.3	-1.29565	6.28275	1.1313e-09	3.61038e-08
ENSG00000109929	SC5D	SC5D	2.33642	7.22213	1.28807e-09	4.08664e-08
ENSG00000138814	PPP3CA	PPP3CA	1.01568	6.42665	1.36422e-09	4.3047e-08
ENSG00000047365	ARAP2	ARAP2	1.10022	6.41005	1.38587e-09	4.3494e-08
ENSG00000163584	RPL22L1	RPL22L1	0.892504	8.97506	1.39348e-09	4.34975e-08
ENSG00000172216	CEBPB	CEBPB	1.00542	8.56801	1.44605e-09	4.48972e-08
ENSG00000134242	PTPN22	PTPN22	1.52258	6.56019	1.68709e-09	5.21025e-08
ENSG00000168906	MAT2A	MAT2A	1.10165	6.86251	1.92256e-09	5.90602e-08
ENSG00000127824	TUBA4A	TUBA4A	1.3565	9.70275	2.2941e-09	6.97359e-08
ENSG00000213676	ATF6B	ATF6B	-1.36625	6.03236	2.28453e-09	6.97359e-08
ENSG00000141580	WDR45B	WDR45B	1.19056	5.57707	2.5186e-09	7.61613e-08
ENSG00000169641	LUZP1	LUZP1	1.36972	6.10629	2.69753e-09	8.11494e-08
ENSG00000274012	RN7SL2	RN7SL2	1.57096	3.51889	2.9374e-09	8.79101e-08
ENSG00000065154	OAT	OAT	1.3844	5.68302	3.20169e-09	9.48419e-08
ENSG00000244398	AC116533.1	AC116533.1	-1.95464	6.91155	3.19362e-09	9.48419e-08
ENSG00000118971	CCND2	CCND2	1.13725	7.24327	3.54175e-09	1.04383e-07
ENSG00000145354	CISD2	CISD2	1.21642	6.46596	3.70091e-09	1.08523e-07
ENSG00000160712	IL6R	IL6R	-1.26218	6.34568	4.11768e-09	1.20137e-07
ENSG00000118263	KLF7	KLF7	-1.55989	5.35072	4.25219e-09	1.23441e-07
ENSG00000108848	LUC7L3	LUC7L3	-1.0875	8.72631	4.37814e-09	1.26465e-07
ENSG00000059758	CDK17	CDK17	1.03606	5.65892	4.439e-09	1.27588e-07
ENSG00000147872	PLIN2	PLIN2	1.90365	7.56093	4.64352e-09	1.32809e-07
ENSG00000165512	ZNF22	ZNF22	-1.18734	6.71608	5.05111e-09	1.43759e-07
ENSG00000144136	SLC20A1	SLC20A1	1.44076	6.09284	5.24466e-09	1.47104e-07
ENSG00000181218	HIST3H2A	HIST3H2A	1.29704	6.42945	5.20383e-09	1.47104e-07
ENSG00000113088	GZMK	GZMK	1.05524	9.12451	5.23219e-09	1.47104e-07
ENSG00000115875	SRSF7	SRSF7	1.09879	10.2759	5.55612e-09	1.54348e-07
ENSG00000175768	TOMM5	TOMM5	0.995248	7.96303	5.54742e-09	1.54348e-07
ENSG00000132661	NXT1	NXT1	1.21996	7.08972	5.79134e-09	1.58606e-07
ENSG00000213585	VDAC1	VDAC1	1.07756	7.96811	5.78909e-09	1.58606e-07
ENSG00000013441	CLK1	CLK1	1.03137	7.63093	5.77649e-09	1.58606e-07
ENSG00000198604	BAZ1A	BAZ1A	1.0459	8.23219	5.9951e-09	1.63416e-07
ENSG00000006634	DBF4	DBF4	1.02394	6.43514	6.15403e-09	1.66964e-07
ENSG00000145414	NAF1	NAF1	1.89093	5.67864	6.2743e-09	1.69435e-07
ENSG00000254838	GVINP1	GVINP1	-1.2074	6.46	6.36224e-09	1.71015e-07
ENSG00000170540	ARL6IP1	ARL6IP1	0.980105	7.76568	6.97713e-09	1.86678e-07
ENSG00000067955	CBFB	CBFB	1.47912	6.73844	7.91657e-09	2.10842e-07
ENSG00000135070	ISCA1	ISCA1	1.24733	7.62585	8.12162e-09	2.15316e-07
ENSG00000125995	ROMO1	ROMO1	1.03759	8.02064	8.66393e-09	2.28649e-07
ENSG00000223705	NSUN5P1	NSUN5P1	-1.63197	6.0607	8.76307e-09	2.30219e-07
ENSG00000140332	TLE3	TLE3	1.13469	6.0415	8.85044e-09	2.31467e-07
ENSG00000062194	GPBP1	GPBP1	1.00641	8.96694	9.03967e-09	2.35356e-07
ENSG00000172115	CYCS	CYCS	1.41528	9.44677	9.77781e-09	2.53437e-07
ENSG00000213203	GIMAP1	GIMAP1	-0.974194	8.01353	9.91567e-09	2.55868e-07
ENSG00000155366	RHOC	RHOC	1.79906	6.55012	1.0292e-08	2.64404e-07
ENSG00000116161	CACYBP	CACYBP	1.66576	8.61712	1.03959e-08	2.65897e-07
ENSG00000175155	YPEL2	YPEL2	-1.15635	6.68198	1.15884e-08	2.95097e-07
ENSG00000135127	BICDL1	BICDL1	1.2089	5.81493	1.20535e-08	3.056e-07
ENSG00000077721	UBE2A	UBE2A	1.79082	6.08096	1.21915e-08	3.07756e-07
ENSG00000168556	ING2	ING2	1.08582	5.9263	1.28476e-08	3.22914e-07
ENSG00000169508	GPR183	GPR183	1.08764	8.45682	1.31083e-08	3.28046e-07
ENSG00000204237	OXLD1	OXLD1	-1.20346	6.99996	1.33161e-08	3.31817e-07
ENSG00000135334	AKIRIN2	AKIRIN2	1.10741	6.93963	1.36544e-08	3.38792e-07
ENSG00000144381	HSPD1	HSPD1	1.63448	9.62309	1.57584e-08	3.89332e-07
ENSG00000184557	SOCS3	SOCS3	1.65476	7.99733	1.59314e-08	3.90285e-07
ENSG00000116679	IVNS1ABP	IVNS1ABP	1.00099	6.61789	1.5903e-08	3.90285e-07
ENSG00000123091	RNF11	RNF11	1.14008	5.67104	1.84432e-08	4.49922e-07
ENSG00000273344	PAXIP1-AS1	PAXIP1-AS1	-1.84513	5.94258	2.41663e-08	5.87068e-07
ENSG00000151929	BAG3	BAG3	1.87977	6.07454	2.47703e-08	5.99236e-07
ENSG00000170340	B3GNT2	B3GNT2	1.6778	5.79148	2.68028e-08	6.43045e-07
ENSG00000257341	AL928654.3	AL928654.3	-1.07684	7.5166	2.67935e-08	6.43045e-07
ENSG00000063322	MED29	MED29	1.00883	6.06568	3.04538e-08	7.27632e-07
ENSG00000100221	JOSD1	JOSD1	1.25031	6.82204	3.0691e-08	7.30296e-07
ENSG00000147457	CHMP7	CHMP7	-1.15696	6.29036	3.3002e-08	7.82079e-07
ENSG00000115165	CYTIP	CYTIP	0.893135	10.046	3.48886e-08	8.23428e-07
ENSG00000173846	PLK3	PLK3	1.61156	7.24685	3.6622e-08	8.6084e-07
ENSG00000139193	CD27	CD27	-0.899954	8.70379	3.71641e-08	8.70061e-07
ENSG00000082153	BZW1	BZW1	0.888356	7.17819	4.07921e-08	9.5116e-07
ENSG00000168374	ARF4	ARF4	1.12826	6.9588	4.19334e-08	9.73862e-07
ENSG00000136108	CKAP2	CKAP2	1.76127	5.77538	4.23517e-08	9.75771e-07
ENSG00000088986	DYNLL1	DYNLL1	1.3511	8.73907	4.21966e-08	9.75771e-07
ENSG00000007168	PAFAH1B1	PAFAH1B1	0.941837	7.55637	4.47069e-08	1.02596e-06
ENSG00000188811	NHLRC3	NHLRC3	-1.27788	5.82804	4.67106e-08	1.06772e-06
ENSG00000119048	UBE2B	UBE2B	0.876122	8.76328	4.99273e-08	1.13234e-06
ENSG00000120690	ELF1	ELF1	0.818345	9.27345	4.97346e-08	1.13234e-06
ENSG00000212694	LINC01089	LINC01089	-1.451	5.68553	5.95694e-08	1.34576e-06
ENSG00000137992	DBT	DBT	-1.35591	5.14851	6.15086e-08	1.38418e-06
ENSG00000116489	CAPZA1	CAPZA1	0.911071	7.89038	6.25574e-08	1.40235e-06
ENSG00000069667	RORA	RORA	0.867239	8.12993	6.457e-08	1.4419e-06
ENSG00000197457	STMN3	STMN3	-1.46621	7.3234	7.05063e-08	1.56843e-06
ENSG00000173598	NUDT4	NUDT4	0.997945	7.11152	8.69476e-08	1.92678e-06
ENSG00000143013	LMO4	LMO4	1.37587	5.96643	8.80481e-08	1.94375e-06
ENSG00000178607	ERN1	ERN1	1.17942	6.60036	9.42312e-08	2.07237e-06
ENSG00000112297	CRYBG1	CRYBG1	1.2083	8.67677	9.72827e-08	2.13141e-06
ENSG00000124203	ZNF831	ZNF831	0.896392	6.87456	1.00977e-07	2.20404e-06
ENSG00000235655	H3F3AP4	H3F3AP4	1.03425	4.54467	1.10653e-07	2.40619e-06
ENSG00000123505	AMD1	AMD1	0.983977	8.00292	1.12091e-07	2.42836e-06
ENSG00000164924	YWHAZ	YWHAZ	0.833146	8.88258	1.13478e-07	2.44927e-06
ENSG00000204677	FAM153CP	FAM153CP	-1.81152	5.64432	1.22188e-07	2.6275e-06
ENSG00000115419	GLS	GLS	0.926376	7.94386	1.31297e-07	2.8026e-06
ENSG00000162241	SLC25A45	SLC25A45	-1.34082	6.39516	1.3107e-07	2.8026e-06
ENSG00000132334	PTPRE	PTPRE	1.09511	5.98121	1.34355e-07	2.85737e-06
ENSG00000126353	CCR7	CCR7	-0.906381	8.36071	1.40775e-07	2.98298e-06
ENSG00000128590	DNAJB9	DNAJB9	1.18725	6.42699	1.46346e-07	3.08976e-06
ENSG00000105643	ARRDC2	ARRDC2	1.2116	6.91208	1.54552e-07	3.2512e-06
ENSG00000113580	NR3C1	NR3C1	1.04754	7.48363	1.56581e-07	3.28199e-06
ENSG00000246705	H2AFJ	H2AFJ	0.957334	7.44224	1.57552e-07	3.29046e-06
ENSG00000100138	SNU13	SNU13	0.865205	9.04546	1.66452e-07	3.46387e-06
ENSG00000164548	TRA2A	TRA2A	0.876241	8.07081	1.718e-07	3.56239e-06
ENSG00000139496	NUP58	NUP58	1.1013	5.13639	1.81491e-07	3.74996e-06
ENSG00000163950	SLBP	SLBP	1.32819	7.14063	1.87734e-07	3.85093e-06
ENSG00000117000	RLF	RLF	1.16114	5.84548	1.88368e-07	3.85093e-06
ENSG00000143669	LYST	LYST	0.985306	5.3992	1.87948e-07	3.85093e-06
ENSG00000185338	SOCS1	SOCS1	0.955009	9.01086	1.97544e-07	4.02435e-06
ENSG00000166750	SLFN5	SLFN5	-1.02245	8.203	1.99486e-07	4.0497e-06
ENSG00000153201	RANBP2	RANBP2	1.42205	7.1004	2.15862e-07	4.36688e-06
ENSG00000089737	DDX24	DDX24	0.855527	8.92302	2.17886e-07	4.39251e-06
ENSG00000132485	ZRANB2	ZRANB2	-0.870893	8.61325	2.25901e-07	4.53833e-06
ENSG00000171988	JMJD1C	JMJD1C	0.895115	7.63364	2.34108e-07	4.687e-06
ENSG00000183864	TOB2	TOB2	1.20835	5.76024	2.41398e-07	4.81635e-06
ENSG00000133561	GIMAP6	GIMAP6	-1.19755	6.29063	2.46448e-07	4.90026e-06
ENSG00000101596	SMCHD1	SMCHD1	0.840874	9.35863	2.52819e-07	5.00978e-06
ENSG00000131188	PRR7	PRR7	1.14508	5.85489	2.58629e-07	5.10749e-06
ENSG00000168887	C2orf68	C2orf68	-1.28191	5.40453	3.03803e-07	5.97925e-06
ENSG00000037757	MRI1	MRI1	-1.32802	5.41369	3.16226e-07	6.20272e-06
ENSG00000179144	GIMAP7	GIMAP7	-1.29712	9.84801	3.27472e-07	6.40169e-06
ENSG00000100664	EIF5	EIF5	0.79634	8.57276	3.43963e-07	6.7015e-06
ENSG00000167325	RRM1	RRM1	1.26779	5.73569	3.5897e-07	6.9705e-06
ENSG00000151883	PARP8	PARP8	0.786831	7.85588	3.6517e-07	7.06726e-06
ENSG00000197329	PELI1	PELI1	1.37977	6.162	3.8017e-07	7.33311e-06
ENSG00000011523	CEP68	CEP68	-1.32545	5.78465	3.97353e-07	7.63918e-06
ENSG00000186469	GNG2	GNG2	1.26609	5.06544	4.00065e-07	7.66592e-06
ENSG00000102144	PGK1	PGK1	0.855346	8.96391	4.78668e-07	9.14193e-06
ENSG00000166128	RAB8B	RAB8B	1.54169	6.78929	5.04007e-07	9.59431e-06
ENSG00000196214	ZNF766	ZNF766	-1.14023	5.62528	5.16426e-07	9.7986e-06
ENSG00000115816	CEBPZ	CEBPZ	0.933363	7.75656	5.35708e-07	1.01313e-05
ENSG00000163328	GPR155	GPR155	-0.983165	7.14722	5.51581e-07	1.03977e-05
ENSG00000242114	MTFP1	MTFP1	1.11706	6.41331	5.64634e-07	1.06093e-05
ENSG00000066294	CD84	CD84	-0.950663	7.51177	5.96033e-07	1.11631e-05
ENSG00000157978	LDLRAP1	LDLRAP1	-1.25631	7.81464	6.1833e-07	1.15435e-05
ENSG00000028137	TNFRSF1B	TNFRSF1B	1.4513	7.31222	6.55666e-07	1.22013e-05
ENSG00000006712	PAF1	PAF1	1.16821	5.52774	6.59168e-07	1.22273e-05
ENSG00000146457	WTAP	WTAP	0.81081	7.48626	6.61742e-07	1.22359e-05
ENSG00000198695	MT-ND6	MT-ND6	-1.05709	8.30025	6.80162e-07	1.25366e-05
ENSG00000108854	SMURF2	SMURF2	0.921999	5.75546	7.14397e-07	1.31259e-05
ENSG00000245904	AC025164.1	AC025164.1	0.924865	6.9903	7.38772e-07	1.34662e-05
ENSG00000158985	CDC42SE2	CDC42SE2	0.79206	7.32447	7.39875e-07	1.34662e-05
ENSG00000150593	PDCD4	PDCD4	0.738366	9.10442	7.38289e-07	1.34662e-05
ENSG00000140379	BCL2A1	BCL2A1	1.05321	6.28225	7.53097e-07	1.3664e-05
ENSG00000136770	DNAJC1	DNAJC1	1.05679	7.19673	7.75168e-07	1.40206e-05
ENSG00000149646	CNBD2	CNBD2	1.08684	4.97734	7.8777e-07	1.42043e-05
ENSG00000214756	CSKMT	CSKMT	0.916033	5.82359	7.97787e-07	1.43404e-05
ENSG00000145919	BOD1	BOD1	-1.06049	6.09172	8.06878e-07	1.44591e-05
ENSG00000105879	CBLL1	CBLL1	-1.23997	5.89355	8.16072e-07	1.45788e-05
ENSG00000241370	RPP21	RPP21	0.821305	6.38928	8.33603e-07	1.48463e-05
ENSG00000169020	ATP5ME	ATP5ME	0.810133	9.01613	8.62507e-07	1.53141e-05
ENSG00000181896	ZNF101	ZNF101	-1.03264	6.68096	9.34129e-07	1.65352e-05
ENSG00000175606	TMEM70	TMEM70	0.854113	6.13901	9.66809e-07	1.70617e-05
ENSG00000108256	NUFIP2	NUFIP2	0.955396	7.39821	9.9056e-07	1.74279e-05
ENSG00000153815	CMIP	CMIP	0.947219	5.76038	1.0348e-06	1.81511e-05
ENSG00000140396	NCOA2	NCOA2	0.973242	5.53383	1.18163e-06	2.06643e-05
ENSG00000214367	HAUS3	HAUS3	0.961377	5.73726	1.18713e-06	2.06981e-05
ENSG00000185883	ATP6V0C	ATP6V0C	0.796663	7.12001	1.2324e-06	2.14232e-05
ENSG00000183918	SH2D1A	SH2D1A	1.54952	5.09541	1.24771e-06	2.16244e-05
ENSG00000131979	GCH1	GCH1	1.14063	5.51047	1.32207e-06	2.2845e-05
ENSG00000177700	POLR2L	POLR2L	0.751234	9.16979	1.34751e-06	2.32156e-05
ENSG00000125844	RRBP1	RRBP1	0.89752	5.52782	1.36107e-06	2.33798e-05
ENSG00000161547	SRSF2	SRSF2	0.981308	8.57305	1.38379e-06	2.37e-05
ENSG00000108219	TSPAN14	TSPAN14	-0.849591	7.63164	1.59437e-06	2.72262e-05
ENSG00000163602	RYBP	RYBP	1.04638	6.00358	1.62583e-06	2.7601e-05
ENSG00000086062	B4GALT1	B4GALT1	0.932928	5.49641	1.62266e-06	2.7601e-05
ENSG00000177105	RHOG	RHOG	0.817678	7.42154	1.66975e-06	2.8264e-05
ENSG00000109320	NFKB1	NFKB1	0.926406	7.76611	1.6837e-06	2.84173e-05
ENSG00000123595	RAB9A	RAB9A	1.06351	6.92254	1.68877e-06	2.84203e-05
ENSG00000226067	LINC00623	LINC00623	0.869475	5.73492	1.69975e-06	2.85224e-05
ENSG00000067334	DNTTIP2	DNTTIP2	0.949014	7.81144	1.70786e-06	2.85758e-05
ENSG00000154124	OTULIN	OTULIN	1.0354	6.57867	1.7731e-06	2.95822e-05
ENSG00000178127	NDUFV2	NDUFV2	1.0362	7.76442	1.81453e-06	3.01275e-05
ENSG00000268218	AC137932.3	AC137932.3	-1.24924	5.33832	1.81616e-06	3.01275e-05
ENSG00000174953	DHX36	DHX36	0.733847	8.18518	1.89717e-06	3.13817e-05
ENSG00000099804	CDC34	CDC34	0.876793	5.40606	1.90956e-06	3.14969e-05
ENSG00000251131	AC025171.3	AC025171.3	1.18288	5.51452	2.00898e-06	3.30429e-05
ENSG00000196262	PPIA	PPIA	0.754345	9.64249	2.01707e-06	3.30822e-05
ENSG00000179820	MYADM	MYADM	1.33939	7.23418	2.0538e-06	3.35898e-05
ENSG00000143622	RIT1	RIT1	0.973152	5.4664	2.06628e-06	3.3699e-05
ENSG00000197728	RPS26	RPS26	0.832161	12.8165	2.07223e-06	3.37013e-05
ENSG00000222041	CYTOR	CYTOR	1.68285	5.85918	2.12193e-06	3.44133e-05
ENSG00000163961	RNF168	RNF168	0.922067	6.73443	2.16488e-06	3.5012e-05
ENSG00000105968	H2AFV	H2AFV	0.824183	8.01302	2.19543e-06	3.52526e-05
ENSG00000175573	C11orf68	C11orf68	-1.09256	5.24807	2.19381e-06	3.52526e-05
ENSG00000288066	AC097448.1	AC097448.1	-1.12147	5.19191	2.19797e-06	3.52526e-05
ENSG00000120833	SOCS2	SOCS2	1.03835	5.31592	2.28052e-06	3.64757e-05
ENSG00000187713	TMEM203	TMEM203	-0.953576	6.94192	2.34923e-06	3.73689e-05
ENSG00000184898	RBM43	RBM43	-0.993067	6.0613	2.34886e-06	3.73689e-05
ENSG00000204256	BRD2	BRD2	0.989109	7.71235	2.37228e-06	3.76324e-05
ENSG00000135241	PNPLA8	PNPLA8	0.916608	6.0655	2.39015e-06	3.78125e-05
ENSG00000072401	UBE2D1	UBE2D1	0.858187	5.85599	2.51027e-06	3.9605e-05
ENSG00000131981	LGALS3	LGALS3	1.6079	7.74573	2.55465e-06	4.01959e-05
ENSG00000138495	COX17	COX17	0.991799	7.91338	2.56731e-06	4.0286e-05
ENSG00000186812	ZNF397	ZNF397	-1.20029	4.88161	2.57638e-06	4.03193e-05
ENSG00000184260	HIST2H2AC	HIST2H2AC	1.001	6.19821	2.64921e-06	4.13476e-05
ENSG00000231799	PA2G4P6	PA2G4P6	-0.927542	7.41809	2.79981e-06	4.35809e-05
ENSG00000196656	AC004057.1	AC004057.1	-1.9902	6.84475	2.8313e-06	4.39533e-05
ENSG00000171476	HOPX	HOPX	1.0834	6.72115	2.88322e-06	4.46399e-05
ENSG00000138600	SPPL2A	SPPL2A	0.829412	6.34861	2.9408e-06	4.54103e-05
ENSG00000155096	AZIN1	AZIN1	1.08751	6.2887	2.97852e-06	4.58709e-05
ENSG00000260708	AL118516.1	AL118516.1	1.11915	7.34285	3.07524e-06	4.72351e-05
ENSG00000152219	ARL14EP	ARL14EP	-0.929012	6.96133	3.15201e-06	4.82865e-05
ENSG00000004478	FKBP4	FKBP4	1.39734	5.73294	3.17369e-06	4.84219e-05
ENSG00000213337	ANKRD39	ANKRD39	0.860479	5.15013	3.17753e-06	4.84219e-05
ENSG00000166233	ARIH1	ARIH1	0.863723	6.85028	3.1959e-06	4.85744e-05
ENSG00000109519	GRPEL1	GRPEL1	0.914301	6.91464	3.21693e-06	4.87662e-05
ENSG00000035687	ADSS	ADSS	0.920442	6.61596	3.41162e-06	5.1583e-05
ENSG00000131051	RBM39	RBM39	0.7607	9.90589	3.58515e-06	5.40659e-05
ENSG00000164073	MFSD8	MFSD8	-1.16947	5.10194	3.60592e-06	5.42383e-05
ENSG00000103121	CMC2	CMC2	0.958953	5.94472	3.68201e-06	5.51183e-05
ENSG00000181222	POLR2A	POLR2A	0.900075	6.65418	3.68342e-06	5.51183e-05
ENSG00000080189	SLC35C2	SLC35C2	-0.987416	6.23276	3.99691e-06	5.96557e-05
ENSG00000136527	TRA2B	TRA2B	0.846282	8.84661	4.16867e-06	6.20597e-05
ENSG00000272980	Z94721.2	Z94721.2	1.18906	5.07989	4.44027e-06	6.57812e-05
ENSG00000273319	AC058791.1	AC058791.1	0.813284	9.03484	4.44131e-06	6.57812e-05
ENSG00000141232	TOB1	TOB1	1.07644	9.26217	4.56539e-06	6.7447e-05
ENSG00000105849	TWISTNB	TWISTNB	1.10545	6.60578	4.76191e-06	7.01717e-05
ENSG00000008517	IL32	IL32	0.90425	10.7957	4.93265e-06	7.25038e-05
ENSG00000173230	GOLGB1	GOLGB1	0.758362	7.3635	5.04595e-06	7.39818e-05
ENSG00000179094	AC129492.1	AC129492.1	1.50599	6.58514	5.09889e-06	7.45696e-05
ENSG00000152484	USP12	USP12	0.96645	5.82181	5.15549e-06	7.52079e-05
ENSG00000260272	AC093525.2	AC093525.2	0.752828	7.08888	5.30705e-06	7.72248e-05
ENSG00000121274	TENT4B	TENT4B	0.912708	5.0057	5.4098e-06	7.85233e-05
ENSG00000165879	FRAT1	FRAT1	0.972724	5.38162	5.51211e-06	7.96102e-05
ENSG00000160058	BSDC1	BSDC1	-1.01759	6.26831	5.49976e-06	7.96102e-05
ENSG00000271869	AC026979.2	AC026979.2	1.02564	7.53176	5.66101e-06	8.15579e-05
ENSG00000169057	MECP2	MECP2	0.816816	6.93698	5.73166e-06	8.23713e-05
ENSG00000105717	PBX4	PBX4	1.01122	5.79761	5.91405e-06	8.47826e-05
ENSG00000105516	DBP	DBP	-1.19245	6.33052	6.01855e-06	8.60683e-05
ENSG00000135048	CEMIP2	CEMIP2	1.26615	9.04483	6.18148e-06	8.8181e-05
ENSG00000131669	NINJ1	NINJ1	1.00504	6.18725	6.32428e-06	8.99969e-05
ENSG00000143319	ISG20L2	ISG20L2	1.14858	6.32859	6.97934e-06	9.9076e-05
ENSG00000189159	JPT1	JPT1	1.75896	8.14331	6.99655e-06	9.9078e-05
ENSG00000154582	ELOC	ELOC	0.749705	7.16646	7.07885e-06	9.99995e-05
ENSG00000271938	AC103724.4	AC103724.4	1.02562	5.89546	7.13183e-06	0.000100503
ENSG00000155463	OXA1L	OXA1L	-0.99816	6.72642	7.1692e-06	0.000100785
ENSG00000132819	RBM38	RBM38	0.950839	7.66847	7.32301e-06	0.000102699
ENSG00000176700	SCAND2P	SCAND2P	-1.08651	4.98244	7.57748e-06	0.000106012
ENSG00000109917	ZPR1	ZPR1	0.814415	6.27422	8.11998e-06	0.000113328
ENSG00000005022	SLC25A5	SLC25A5	0.71067	9.33679	8.22097e-06	0.000114463
ENSG00000211460	TSN	TSN	-0.917763	6.06745	8.50002e-06	0.000118065
ENSG00000116560	SFPQ	SFPQ	0.827351	8.89323	8.80775e-06	0.000122047
ENSG00000165178	NCF1C	NCF1C	1.09106	6.19371	8.87051e-06	0.000122624
ENSG00000168421	RHOH	RHOH	0.685749	8.78852	8.90295e-06	0.00012278
ENSG00000077150	NFKB2	NFKB2	1.03172	5.51276	8.98609e-06	0.000123633
ENSG00000127585	FBXL16	FBXL16	-1.10491	5.16792	9.0234e-06	0.000123853
ENSG00000170906	NDUFA3	NDUFA3	0.669205	8.56285	9.21093e-06	0.000126129
ENSG00000094975	SUCO	SUCO	0.756426	6.03684	9.54282e-06	0.000130366
ENSG00000172466	ZNF24	ZNF24	-0.842617	7.15668	9.69706e-06	0.000132162
ENSG00000229833	PET100	PET100	0.721843	8.27587	1.01021e-05	0.00013736
ENSG00000144635	DYNC1LI1	DYNC1LI1	0.789133	6.50092	1.03499e-05	0.000140401
ENSG00000100353	EIF3D	EIF3D	-0.935707	8.99318	1.0379e-05	0.000140468
ENSG00000150093	ITGB1	ITGB1	0.926573	9.20664	1.05147e-05	0.000141644
ENSG00000278970	HEIH	HEIH	-0.973749	6.21079	1.04966e-05	0.000141644
ENSG00000125347	IRF1	IRF1	0.666569	9.11464	1.12071e-05	0.000150621
ENSG00000165527	ARF6	ARF6	0.692694	8.38932	1.12463e-05	0.000150799
ENSG00000142634	EFHD2	EFHD2	0.843609	6.82559	1.15643e-05	0.000154706
ENSG00000167615	LENG8	LENG8	-1.08944	7.04373	1.17623e-05	0.000156993
ENSG00000124702	KLHDC3	KLHDC3	-1.10429	5.6124	1.20081e-05	0.000159906
ENSG00000166260	COX11	COX11	-0.952456	6.10195	1.22406e-05	0.00016263
ENSG00000269609	RPARP-AS1	RPARP-AS1	-1.15126	4.78671	1.23904e-05	0.000164244
ENSG00000143933	CALM2	CALM2	1.08687	8.45426	1.27497e-05	0.000168621
ENSG00000167261	DPEP2	DPEP2	-1.00475	5.36027	1.27827e-05	0.000168674
ENSG00000205189	ZBTB10	ZBTB10	1.42464	5.77886	1.29077e-05	0.000169937
ENSG00000148175	STOM	STOM	1.26134	5.58487	1.31417e-05	0.000172626
ENSG00000106211	HSPB1	HSPB1	1.21745	8.79061	1.35715e-05	0.000177869
ENSG00000247828	TMEM161B-AS1	TMEM161B-AS1	-1.00065	5.94233	1.36713e-05	0.000178773
ENSG00000130770	ATP5IF1	ATP5IF1	0.6387	9.0163	1.37546e-05	0.000179459
ENSG00000180448	AC004151.1	AC004151.1	-0.811467	8.2105	1.38829e-05	0.000180726
ENSG00000108389	MTMR4	MTMR4	-1.05854	5.01952	1.43283e-05	0.000186108
ENSG00000245556	SCAMP1-AS1	SCAMP1-AS1	-1.06322	4.85398	1.43696e-05	0.000186228
ENSG00000107872	FBXL15	FBXL15	-0.855324	6.77261	1.45821e-05	0.00018856
ENSG00000158615	PPP1R15B	PPP1R15B	0.902928	6.78677	1.46316e-05	0.00018878
ENSG00000180233	ZNRF2	ZNRF2	0.790623	4.88223	1.52555e-05	0.000196393
ENSG00000042493	CAPG	CAPG	1.62151	6.75053	1.54293e-05	0.000198191
ENSG00000165898	ISCA2	ISCA2	-0.963415	6.37778	1.55494e-05	0.000199294
ENSG00000109971	HSPA8	HSPA8	0.809985	11.0281	1.55942e-05	0.000199377
ENSG00000178562	CD28	CD28	0.791212	7.19677	1.5659e-05	0.000199377
ENSG00000135426	TESPA1	TESPA1	-0.957973	7.10752	1.56535e-05	0.000199377
ENSG00000141551	CSNK1D	CSNK1D	0.797211	5.65419	1.57565e-05	0.00020018
ENSG00000102786	INTS6	INTS6	0.833077	6.17907	1.61042e-05	0.000203705
ENSG00000122644	ARL4A	ARL4A	0.777973	7.98224	1.60799e-05	0.000203705
ENSG00000110321	EIF4G2	EIF4G2	0.707381	8.78556	1.67979e-05	0.000212019
ENSG00000112486	CCR6	CCR6	1.19266	5.06258	1.73581e-05	0.000218141
ENSG00000256338	RPL41P2	RPL41P2	1.02234	5.58813	1.7336e-05	0.000218141
ENSG00000132780	NASP	NASP	0.930725	7.99029	1.74479e-05	0.000218796
ENSG00000104870	FCGRT	FCGRT	-1.47509	6.51773	1.7561e-05	0.000219739
ENSG00000168675	LDLRAD4	LDLRAD4	1.39979	5.78288	1.79608e-05	0.000224259
ENSG00000147224	PRPS1	PRPS1	0.766883	5.88217	1.83327e-05	0.000228411
ENSG00000198520	ARMH1	ARMH1	-0.968183	6.93873	1.86386e-05	0.000231726
ENSG00000174574	AKIRIN1	AKIRIN1	0.730183	8.15891	1.91112e-05	0.000237093
ENSG00000123146	ADGRE5	ADGRE5	0.696961	7.85534	1.91953e-05	0.000237629
ENSG00000121058	COIL	COIL	-0.896595	6.23635	1.92756e-05	0.000237843
ENSG00000116906	GNPAT	GNPAT	-1.19233	6.14251	1.92945e-05	0.000237843
ENSG00000205356	TECPR1	TECPR1	-1.15935	5.75757	1.9429e-05	0.000238993
ENSG00000232442	MHENCR	MHENCR	-1.06789	6.91731	1.9568e-05	0.000240194
ENSG00000109046	WSB1	WSB1	0.750439	7.91107	1.97162e-05	0.000241502
ENSG00000167797	CDK2AP2	CDK2AP2	0.902693	7.19059	2.00555e-05	0.000244627
ENSG00000142546	NOSIP	NOSIP	-1.03005	9.60937	2.00187e-05	0.000244627
ENSG00000247287	AL359220.1	AL359220.1	-1.21342	5.22251	2.05563e-05	0.000250209
ENSG00000120915	EPHX2	EPHX2	-1.40078	6.4543	2.07105e-05	0.000251559
ENSG00000124214	STAU1	STAU1	0.786672	7.00364	2.08555e-05	0.000252791
ENSG00000153147	SMARCA5	SMARCA5	0.688155	7.88711	2.10619e-05	0.000254762
ENSG00000101972	STAG2	STAG2	0.781584	7.18155	2.12849e-05	0.000256924
ENSG00000133872	SARAF	SARAF	0.671609	11.629	2.13934e-05	0.000257697
ENSG00000166595	CIAO2B	CIAO2B	0.675494	7.93533	2.14528e-05	0.000257878
ENSG00000121579	NAA50	NAA50	1.07817	6.07603	2.27351e-05	0.000272728
ENSG00000142065	ZFP14	ZFP14	-0.964934	5.76536	2.32821e-05	0.000278713
ENSG00000173113	TRMT112	TRMT112	0.68678	8.91688	2.4369e-05	0.000291125
ENSG00000160613	PCSK7	PCSK7	-0.823466	7.7474	2.47357e-05	0.000294802
ENSG00000197880	MDS2	MDS2	-1.13767	5.36752	2.47784e-05	0.000294802
ENSG00000242247	ARFGAP3	ARFGAP3	0.839009	6.24768	2.48743e-05	0.000295002
ENSG00000175567	UCP2	UCP2	-0.69567	8.5306	2.48968e-05	0.000295002
ENSG00000183943	PRKX	PRKX	0.723812	6.4948	2.5165e-05	0.000297572
ENSG00000104904	OAZ1	OAZ1	0.683259	10.074	2.59246e-05	0.000305311
ENSG00000234608	MAPKAPK5-AS1	MAPKAPK5-AS1	-0.769649	7.38039	2.58771e-05	0.000305311
ENSG00000142765	SYTL1	SYTL1	-0.806177	7.62922	2.66243e-05	0.000312917
ENSG00000164483	SAMD3	SAMD3	0.7866	6.52644	2.67112e-05	0.000313303
ENSG00000256028	AC026362.1	AC026362.1	-0.829923	7.51358	2.7133e-05	0.000317609
ENSG00000175221	MED16	MED16	-0.911656	6.11697	2.75194e-05	0.000321484
ENSG00000162086	ZNF75A	ZNF75A	-0.958146	5.6538	2.78261e-05	0.000323596
ENSG00000088888	MAVS	MAVS	-0.981201	5.39271	2.78059e-05	0.000323596
ENSG00000089335	ZNF302	ZNF302	-1.12153	5.21685	2.78674e-05	0.000323596
ENSG00000180376	CCDC66	CCDC66	-0.794929	7.55973	2.79512e-05	0.000323921
ENSG00000101347	SAMHD1	SAMHD1	-0.817299	8.45982	2.81173e-05	0.000325197
ENSG00000118503	TNFAIP3	TNFAIP3	1.23366	10.2674	2.95482e-05	0.000341068
ENSG00000111011	RSRC2	RSRC2	0.624257	8.23534	2.96155e-05	0.000341097
ENSG00000112992	NNT	NNT	-0.955161	5.45526	2.96683e-05	0.000341097
ENSG00000159884	CCDC107	CCDC107	1.08631	7.9845	3.01262e-05	0.000345678
ENSG00000112118	MCM3	MCM3	-0.987911	5.32597	3.08153e-05	0.000352887
ENSG00000062716	VMP1	VMP1	0.863603	7.82605	3.14462e-05	0.000359403
ENSG00000183955	KMT5A	KMT5A	0.859762	5.63311	3.17044e-05	0.000360614
ENSG00000006451	RALA	RALA	0.76365	6.98984	3.17385e-05	0.000360614
ENSG00000271858	Z84492.1	Z84492.1	-1.03645	5.62606	3.16151e-05	0.000360614
ENSG00000147853	AK3	AK3	-1.0968	6.03163	3.18139e-05	0.000360765
ENSG00000118620	ZNF430	ZNF430	-0.838789	7.0624	3.23696e-05	0.000366351
ENSG00000158122	PRXL2C	PRXL2C	0.765724	5.92639	3.27463e-05	0.000369893
ENSG00000131634	TMEM204	TMEM204	-0.890574	6.26747	3.29326e-05	0.000371275
ENSG00000271109	AC008555.4	AC008555.4	-0.930392	6.63271	3.30513e-05	0.000371891
ENSG00000135905	DOCK10	DOCK10	0.739165	6.87034	3.36511e-05	0.000377908
ENSG00000100129	EIF3L	EIF3L	-0.875077	9.17742	3.4214e-05	0.000383487
ENSG00000168439	STIP1	STIP1	0.916631	6.19749	3.47549e-05	0.000388799
ENSG00000162889	MAPKAPK2	MAPKAPK2	0.855171	6.2399	3.48665e-05	0.000389297
ENSG00000163599	CTLA4	CTLA4	1.33086	5.89378	3.51612e-05	0.000391835
ENSG00000168298	HIST1H1E	HIST1H1E	0.966006	5.73572	3.5494e-05	0.000393657
ENSG00000169967	MAP3K2	MAP3K2	0.735618	7.35417	3.53963e-05	0.000393657
ENSG00000112081	SRSF3	SRSF3	0.676809	9.64029	3.55281e-05	0.000393657
ENSG00000107771	CCSER2	CCSER2	0.643304	7.91156	3.62185e-05	0.000400542
ENSG00000139278	GLIPR1	GLIPR1	0.763071	7.95585	3.78947e-05	0.000418283
ENSG00000150867	PIP4K2A	PIP4K2A	0.662417	8.15482	3.80915e-05	0.000419657
ENSG00000170542	SERPINB9	SERPINB9	0.876766	7.26702	3.87237e-05	0.000425814
ENSG00000145860	RNF145	RNF145	0.781807	6.70375	3.91395e-05	0.000429573
ENSG00000152795	HNRNPDL	HNRNPDL	0.609851	10.0351	3.92249e-05	0.000429698
ENSG00000107537	PHYH	PHYH	0.8776	5.65414	3.9785e-05	0.000434981
ENSG00000125863	MKKS	MKKS	-0.869145	5.91577	3.9857e-05	0.000434981
ENSG00000113575	PPP2CA	PPP2CA	0.943605	5.58044	4.16428e-05	0.000453617
ENSG00000185115	NSMCE3	NSMCE3	0.864746	7.67551	4.29807e-05	0.000467315
ENSG00000158201	ABHD3	ABHD3	0.880618	5.25332	4.38987e-05	0.000472869
ENSG00000120709	FAM53C	FAM53C	0.87307	5.12933	4.36909e-05	0.000472869
ENSG00000119632	IFI27L2	IFI27L2	0.817009	7.64782	4.38934e-05	0.000472869
ENSG00000167004	PDIA3	PDIA3	0.638088	8.80494	4.3665e-05	0.000472869
ENSG00000255508	AP002990.1	AP002990.1	-0.819261	11.3872	4.38988e-05	0.000472869
ENSG00000006576	PHTF2	PHTF2	1.12428	6.11982	4.42755e-05	0.000476043
ENSG00000175595	ERCC4	ERCC4	-0.995782	5.12155	4.457e-05	0.000478324
ENSG00000169762	TAPT1	TAPT1	0.72427	5.52698	4.51059e-05	0.000483183
ENSG00000129518	EAPP	EAPP	-0.716883	7.55455	4.53886e-05	0.000485315
ENSG00000117632	STMN1	STMN1	1.57755	6.70144	4.55435e-05	0.0004859
ENSG00000104419	NDRG1	NDRG1	1.09828	6.00616	4.56107e-05	0.0004859
ENSG00000124228	DDX27	DDX27	0.739413	7.14149	4.6394e-05	0.00049334
ENSG00000181788	SIAH2	SIAH2	0.820675	7.18889	4.65494e-05	0.000494088
ENSG00000115758	ODC1	ODC1	0.690679	7.52524	4.84053e-05	0.000512469
ENSG00000100650	SRSF5	SRSF5	-0.789791	10.3258	4.84577e-05	0.000512469
ENSG00000176340	COX8A	COX8A	0.725731	8.64523	4.98473e-05	0.000524903
ENSG00000174738	NR1D2	NR1D2	0.685845	6.44377	4.99046e-05	0.000524903
ENSG00000107614	TRDMT1	TRDMT1	-1.14483	5.94918	4.98603e-05	0.000524903
ENSG00000162894	FCMR	FCMR	-0.689289	7.87376	5.11893e-05	0.000537442
ENSG00000237440	AC008554.1	AC008554.1	-1.12827	4.93779	5.15183e-05	0.00053992
ENSG00000147443	DOK2	DOK2	1.15941	7.80644	5.34851e-05	0.000558737
ENSG00000258674	AC011448.1	AC011448.1	-0.923802	6.57474	5.35063e-05	0.000558737
ENSG00000161179	YDJC	YDJC	-0.887489	6.60165	5.57648e-05	0.000581276
ENSG00000080822	CLDND1	CLDND1	0.730936	6.07751	5.59448e-05	0.000582107
ENSG00000133574	GIMAP4	GIMAP4	-1.12359	8.77123	5.6186e-05	0.000583571
ENSG00000109220	CHIC2	CHIC2	0.702478	6.57132	5.63237e-05	0.000583956
ENSG00000133028	SCO1	SCO1	-0.872955	5.76437	5.65264e-05	0.000585013
ENSG00000100055	CYTH4	CYTH4	-0.989598	6.1876	5.66436e-05	0.000585182
ENSG00000257815	AC025159.1	AC025159.1	-0.991033	5.27166	5.74361e-05	0.000592316
ENSG00000178573	MAF	MAF	1.67111	7.26849	5.88393e-05	0.000605711
ENSG00000103351	CLUAP1	CLUAP1	-0.972369	6.21659	5.98916e-05	0.000615452
ENSG00000100201	DDX17	DDX17	-0.650392	9.20911	6.01013e-05	0.000616516
ENSG00000122435	TRMT13	TRMT13	-0.902329	5.77496	6.03407e-05	0.00061788
ENSG00000277957	SENP3-EIF4A1	SENP3-EIF4A1	0.71158	7.95079	6.07544e-05	0.000621021
ENSG00000015153	YAF2	YAF2	0.857857	6.33781	6.11522e-05	0.000623989
ENSG00000110330	BIRC2	BIRC2	0.750627	6.44617	6.19625e-05	0.000630042
ENSG00000134308	YWHAQ	YWHAQ	0.715085	8.3069	6.19296e-05	0.000630042
ENSG00000132965	ALOX5AP	ALOX5AP	0.834459	8.26474	6.23339e-05	0.00063271
ENSG00000221823	PPP3R1	PPP3R1	0.820957	4.5225	6.2637e-05	0.000634678
ENSG00000265118	AC134669.1	AC134669.1	0.994964	5.01863	6.34059e-05	0.000641349
ENSG00000111775	COX6A1	COX6A1	0.629945	8.95772	6.56798e-05	0.000663194
ENSG00000107485	GATA3	GATA3	0.833502	7.15186	6.60335e-05	0.000665609
ENSG00000077458	FAM76B	FAM76B	0.68564	6.03765	6.75448e-05	0.000679663
ENSG00000183336	BOLA2	BOLA2	0.773894	7.06015	6.83496e-05	0.000686571
ENSG00000178974	FBXO34	FBXO34	1.0145	4.96957	6.92467e-05	0.000694063
ENSG00000133794	ARNTL	ARNTL	0.741081	5.44398	6.93346e-05	0.000694063
ENSG00000253716	MINCR	MINCR	-1.05232	5.23769	7.0247e-05	0.000701987
ENSG00000186532	SMYD4	SMYD4	-0.974846	5.00997	7.1259e-05	0.000710876
ENSG00000002586	CD99	CD99	0.661703	9.58657	7.16396e-05	0.000713447
ENSG00000117500	TMED5	TMED5	0.803457	6.61831	7.20025e-05	0.000715833
ENSG00000012983	MAP4K5	MAP4K5	0.772842	5.3929	7.24519e-05	0.00071907
ENSG00000197635	DPP4	DPP4	0.798834	6.51543	7.26974e-05	0.000720275
ENSG00000157191	NECAP2	NECAP2	-0.76734	7.67659	7.29809e-05	0.000721852
ENSG00000130402	ACTN4	ACTN4	1.02239	6.68874	7.40613e-05	0.000731292
ENSG00000135916	ITM2C	ITM2C	0.811843	6.10665	7.51178e-05	0.000740465
ENSG00000156990	RPUSD3	RPUSD3	-0.960852	5.13195	7.52624e-05	0.000740633
ENSG00000068120	COASY	COASY	-0.89948	5.30982	7.62742e-05	0.00074932
ENSG00000110876	SELPLG	SELPLG	-0.770855	7.1283	7.68144e-05	0.000753352
ENSG00000164405	UQCRQ	UQCRQ	0.629502	8.66933	7.75216e-05	0.000758579
ENSG00000114735	HEMK1	HEMK1	-0.915113	5.4347	7.76086e-05	0.000758579
ENSG00000139620	KANSL2	KANSL2	0.846375	5.66116	7.86783e-05	0.000767742
ENSG00000186827	TNFRSF4	TNFRSF4	1.54306	7.00691	7.94888e-05	0.000769366
ENSG00000177144	NUDT4B	NUDT4B	0.805646	4.60268	7.9335e-05	0.000769366
ENSG00000112977	DAP	DAP	0.696306	5.71168	7.91613e-05	0.000769366
ENSG00000172005	MAL	MAL	-0.675626	8.59805	7.95074e-05	0.000769366
ENSG00000130305	NSUN5	NSUN5	-0.868631	5.50833	7.9211e-05	0.000769366
ENSG00000180747	SMG1P3	SMG1P3	0.773929	4.60399	8.16795e-05	0.00078907
ENSG00000097033	SH3GLB1	SH3GLB1	0.821165	7.02075	8.21639e-05	0.000792431
ENSG00000164104	HMGB2	HMGB2	0.986147	9.19801	8.46231e-05	0.000814796
ENSG00000163840	DTX3L	DTX3L	-0.924765	5.28947	8.59441e-05	0.000826145
ENSG00000158864	NDUFS2	NDUFS2	-0.720985	7.14192	8.7172e-05	0.000836563
ENSG00000161960	EIF4A1	EIF4A1	0.820548	9.54323	8.74593e-05	0.000837936
ENSG00000065809	FAM107B	FAM107B	0.589551	9.25744	8.79807e-05	0.000841542
ENSG00000131174	COX7B	COX7B	0.621829	9.17517	9.1906e-05	0.000877642
ENSG00000111540	AC034102.1	AC034102.1	-0.991098	5.08898	9.21923e-05	0.00087893
ENSG00000170881	RNF139	RNF139	0.863795	6.44602	9.4435e-05	0.000898836
ENSG00000215301	DDX3X	DDX3X	0.806408	8.99396	9.4787e-05	0.00090071
ENSG00000015568	RGPD5	RGPD5	0.876462	4.98107	9.52716e-05	0.000903015
ENSG00000183684	ALYREF	ALYREF	0.802386	6.35064	9.53407e-05	0.000903015
ENSG00000134996	OSTF1	OSTF1	0.738935	7.84142	9.74006e-05	0.000921022
ENSG00000167658	EEF2	EEF2	-0.688663	10.8328	9.90875e-05	0.000935451
ENSG00000113013	HSPA9	HSPA9	0.748035	7.57482	9.93683e-05	0.000936579
ENSG00000284194	SCO2	SCO2	0.82888	5.25964	9.96976e-05	0.000938159
ENSG00000181610	MRPS23	MRPS23	-0.904629	6.11856	0.000100609	0.000945208
ENSG00000198521	ZNF43	ZNF43	-1.00972	5.2261	0.000101244	0.000949634
ENSG00000198805	PNP	PNP	1.32549	6.11327	0.000101625	0.00095014
ENSG00000005194	CIAPIN1	CIAPIN1	-0.975695	6.27584	0.00010159	0.00095014
ENSG00000102580	DNAJC3	DNAJC3	0.687853	6.87095	0.000104651	0.000976859
ENSG00000198563	DDX39B	DDX39B	-0.689611	7.59657	0.000111071	0.00103512
ENSG00000187837	HIST1H1C	HIST1H1C	1.176	6.83421	0.000111448	0.00103697
ENSG00000110848	CD69	CD69	0.718268	10.8622	0.000116079	0.00107833
ENSG00000256646	AC010132.3	AC010132.3	-0.952248	4.96878	0.000117921	0.00109369
ENSG00000170606	HSPA4	HSPA4	0.865248	6.50514	0.000118756	0.00109968
ENSG00000174021	GNG5	GNG5	0.759868	7.86971	0.000119424	0.00110234
ENSG00000145220	LYAR	LYAR	0.636028	8.06912	0.000119331	0.00110234
ENSG00000110172	CHORDC1	CHORDC1	0.981099	7.25783	0.000119772	0.00110265
ENSG00000135870	RC3H1	RC3H1	0.676068	6.60308	0.000119837	0.00110265
ENSG00000271856	LINC01215	LINC01215	-0.945007	5.40063	0.000120334	0.00110547
ENSG00000110429	FBXO3	FBXO3	-0.88732	5.30519	0.000121475	0.00111419
ENSG00000237943	PRKCQ-AS1	PRKCQ-AS1	-0.826546	9.37794	0.000125669	0.00115084
ENSG00000116157	GPX7	GPX7	-0.845925	5.3493	0.000128257	0.00117269
ENSG00000067082	KLF6	KLF6	0.610787	9.18201	0.000129651	0.00118357
ENSG00000144566	RAB5A	RAB5A	0.854871	6.44293	0.0001306	0.00118665
ENSG00000279602	AC109326.1	AC109326.1	0.793694	4.72803	0.000130435	0.00118665
ENSG00000136997	MYC	MYC	-0.986271	7.45026	0.0001306	0.00118665
ENSG00000198301	SDAD1	SDAD1	-0.750364	6.59766	0.000133276	0.00120907
ENSG00000169045	HNRNPH1	HNRNPH1	0.707537	9.57601	0.000134545	0.00121867
ENSG00000147669	POLR2K	POLR2K	0.708223	7.69746	0.000139778	0.0012641
ENSG00000101935	AMMECR1	AMMECR1	-0.885576	5.7237	0.000141018	0.00127333
ENSG00000125910	S1PR4	S1PR4	-0.739255	7.9577	0.000147331	0.00132827
ENSG00000111266	DUSP16	DUSP16	0.824547	5.79196	0.000147737	0.00132987
ENSG00000278311	GGNBP2	GGNBP2	-0.626477	8.28982	0.000150072	0.0013467
ENSG00000280800	FP671120.4	FP671120.4	-0.883303	9.79988	0.000149959	0.0013467
ENSG00000178252	WDR6	WDR6	-0.877768	5.75036	0.000154058	0.00138034
ENSG00000165434	PGM2L1	PGM2L1	0.678997	5.21395	0.000155536	0.00139144
ENSG00000106261	ZKSCAN1	ZKSCAN1	-0.753473	6.28425	0.000155971	0.00139318
ENSG00000156804	FBXO32	FBXO32	-0.964235	7.51625	0.000156267	0.00139368
ENSG00000183624	HMCES	HMCES	0.672918	6.46222	0.000157745	0.0014047
ENSG00000243449	C4orf48	C4orf48	0.719507	7.4949	0.000158022	0.00140502
ENSG00000143110	C1orf162	C1orf162	-0.836308	8.08598	0.000158964	0.00141123
ENSG00000113387	SUB1	SUB1	0.646821	9.97782	0.000159213	0.00141128
ENSG00000091527	CDV3	CDV3	0.628139	8.74583	0.000161883	0.00143276
ENSG00000012660	ELOVL5	ELOVL5	0.801155	6.46912	0.000164656	0.00145509
ENSG00000285171	AL590764.2	AL590764.2	0.960286	5.00653	0.00016628	0.00146528
ENSG00000177082	WDR73	WDR73	-0.911528	5.83991	0.000166314	0.00146528
ENSG00000175463	TBC1D10C	TBC1D10C	-0.61498	8.24234	0.000167074	0.00146974
ENSG00000147168	IL2RG	IL2RG	0.725486	8.18303	0.000167977	0.00147545
ENSG00000267216	AC020915.1	AC020915.1	0.697175	5.01053	0.000170072	0.00149159
ENSG00000178809	TRIM73	TRIM73	-1.13069	3.54959	0.000171467	0.00150157
ENSG00000165169	DYNLT3	DYNLT3	0.683531	6.11664	0.000177126	0.00154878
ENSG00000169627	BOLA2B	BOLA2B	0.684924	6.70869	0.000179724	0.00156914
ENSG00000173867	AC013489.1	AC013489.1	-1.03641	4.55002	0.00018039	0.00157259
ENSG00000204371	EHMT2	EHMT2	-0.832917	5.61322	0.000181045	0.00157357
ENSG00000110060	PUS3	PUS3	-0.850317	5.07251	0.000180966	0.00157357
ENSG00000173915	ATP5MD	ATP5MD	0.616596	9.64366	0.00018234	0.00158246
ENSG00000196247	ZNF107	ZNF107	-0.897754	5.61033	0.0001847	0.00160055
ENSG00000122678	POLM	POLM	-0.906892	5.40589	0.000188498	0.00163103
ENSG00000150907	FOXO1	FOXO1	0.840882	5.81576	0.000189812	0.00163996
ENSG00000119953	SMNDC1	SMNDC1	0.706935	6.62567	0.000190509	0.00164353
ENSG00000196510	ANAPC7	ANAPC7	-0.911056	4.81266	0.000191637	0.00165081
ENSG00000081870	HSPB11	HSPB11	0.644315	6.6264	0.000193221	0.00166108
ENSG00000272325	NUDT3	NUDT3	-0.834944	5.86115	0.000193402	0.00166108
ENSG00000175611	LINC00476	LINC00476	-0.837036	5.98467	0.000193921	0.00166308
ENSG00000245849	RAD51-AS1	RAD51-AS1	-0.861158	5.40155	0.000194497	0.00166556
ENSG00000169964	TMEM42	TMEM42	-0.933639	4.81483	0.000196225	0.00167789
ENSG00000100612	DHRS7	DHRS7	0.688442	8.0167	0.000202117	0.00172572
ENSG00000111670	GNPTAB	GNPTAB	0.764494	6.26492	0.000203262	0.00173295
ENSG00000166848	TERF2IP	TERF2IP	0.659396	7.93725	0.000205055	0.00174312
ENSG00000196329	GIMAP5	GIMAP5	-0.893474	6.18784	0.000204842	0.00174312
ENSG00000173559	NABP1	NABP1	1.17458	6.58894	0.000205619	0.00174535
ENSG00000163605	PPP4R2	PPP4R2	0.675389	7.06473	0.000212214	0.00179871
ENSG00000271092	TMEM56-RWDD3	TMEM56-RWDD3	-0.849455	5.74628	0.000213414	0.00180624
ENSG00000174109	C16orf91	C16orf91	0.665257	5.81054	0.000216095	0.00182627
ENSG00000105373	NOP53	NOP53	-0.784651	11.2524	0.00021652	0.0018272
ENSG00000106123	EPHB6	EPHB6	-0.896765	6.02719	0.000217307	0.00183118
ENSG00000113810	SMC4	SMC4	0.840498	6.24472	0.00022055	0.00185581
ENSG00000141380	AC091021.1	AC091021.1	0.64221	6.12408	0.000223549	0.00187833
ENSG00000168876	ANKRD49	ANKRD49	-0.787924	6.95278	0.000225659	0.00189331
ENSG00000069998	HDHD5	HDHD5	-0.834679	5.21432	0.000226604	0.00189851
ENSG00000123983	ACSL3	ACSL3	0.677359	5.53836	0.000231151	0.00193381
ENSG00000129625	REEP5	REEP5	0.886441	7.80382	0.000233357	0.00194945
ENSG00000172171	TEFM	TEFM	-0.902324	5.18899	0.000238942	0.00199325
ENSG00000137642	SORL1	SORL1	-0.736453	7.41709	0.000243244	0.00202622
ENSG00000170571	EMB	EMB	0.634955	8.3717	0.000243746	0.00202749
ENSG00000254772	EEF1G	EEF1G	-0.760181	11.458	0.000248884	0.00206727
ENSG00000164880	INTS1	INTS1	-0.877943	5.11367	0.000249892	0.00207267
ENSG00000064547	LPAR2	LPAR2	0.668536	6.3008	0.000251205	0.00208059
ENSG00000183648	NDUFB1	NDUFB1	0.656403	8.55215	0.000251921	0.00208355
ENSG00000213145	CRIP1	CRIP1	0.656355	10.5248	0.000258962	0.00213874
ENSG00000136986	DERL1	DERL1	0.622214	6.62003	0.000260487	0.00214219
ENSG00000172113	NME6	NME6	-1.07133	5.23566	0.000260067	0.00214219
ENSG00000188404	SELL	SELL	-1.19169	8.94712	0.000260468	0.00214219
ENSG00000108953	YWHAE	YWHAE	0.672805	7.29739	0.000263796	0.00216634
ENSG00000151304	SRFBP1	SRFBP1	-0.807469	6.02684	0.000265301	0.00217562
ENSG00000147471	PLPBP	PLPBP	-0.758739	6.07333	0.000265814	0.00217675
ENSG00000115561	CHMP3	CHMP3	-0.718664	7.32591	0.000269363	0.00220271
ENSG00000214706	IFRD2	IFRD2	-0.800939	5.97541	0.000270324	0.00220745
ENSG00000106615	RHEB	RHEB	0.819075	7.02025	0.000270907	0.00220911
ENSG00000175782	SLC35E3	SLC35E3	-0.919553	4.81886	0.000272133	0.00221599
ENSG00000141582	CBX4	CBX4	0.705578	6.32824	0.000273154	0.00221809
ENSG00000185043	CIB1	CIB1	0.671454	9.26319	0.000272894	0.00221809
ENSG00000148700	ADD3	ADD3	-0.728658	8.40085	0.000274161	0.00222315
ENSG00000111679	PTPN6	PTPN6	-0.779519	6.6277	0.000276748	0.002241
ENSG00000123684	LPGAT1	LPGAT1	0.735996	6.17211	0.000280134	0.00226419
ENSG00000178761	FAM219B	FAM219B	-0.877184	5.08054	0.000280781	0.00226419
ENSG00000143641	GALNT2	GALNT2	-1.03157	5.72285	0.000280511	0.00226419
ENSG00000141295	SCRN2	SCRN2	-0.840974	5.28785	0.000282138	0.00227197
ENSG00000131503	ANKHD1	ANKHD1	0.650683	6.22671	0.00028257	0.0022723
ENSG00000126777	KTN1	KTN1	0.662245	8.20744	0.000286883	0.0023001
ENSG00000182934	SRPRA	SRPRA	0.610709	7.23041	0.000287216	0.0023001
ENSG00000100100	PIK3IP1	PIK3IP1	-0.645215	10.2156	0.000286445	0.0023001
ENSG00000138449	SLC40A1	SLC40A1	-0.964076	5.66408	0.000289404	0.00231443
ENSG00000156928	MALSU1	MALSU1	-0.828167	6.05843	0.000290022	0.00231619
ENSG00000278743	AC087239.1	AC087239.1	0.818625	5.84613	0.000292418	0.00233211
ENSG00000173674	EIF1AX	EIF1AX	0.59139	8.27685	0.000293071	0.00233411
ENSG00000267571	AC104532.2	AC104532.2	-1.06477	5.349	0.000303297	0.00241225
ENSG00000153561	RMND5A	RMND5A	0.77572	5.47359	0.000305477	0.00242295
ENSG00000215021	PHB2	PHB2	-0.650773	8.34949	0.000305262	0.00242295
ENSG00000080546	SESN1	SESN1	-0.673115	6.96902	0.000308529	0.00244382
ENSG00000182841	RRP7BP	RRP7BP	-0.900133	4.95359	0.000309971	0.0024519
ENSG00000213719	CLIC1	CLIC1	0.800481	9.8916	0.000313483	0.00247631
ENSG00000139626	ITGB7	ITGB7	-0.721801	6.66835	0.000317448	0.00250422
ENSG00000261824	LINC00662	LINC00662	-0.865748	5.23737	0.000317954	0.0025048
ENSG00000168286	THAP11	THAP11	-0.814305	6.90414	0.000329582	0.00259289
ENSG00000256862	AC005842.1	AC005842.1	-0.821126	5.70734	0.000332302	0.00261075
ENSG00000119559	C19orf25	C19orf25	-0.793984	5.84268	0.000334692	0.00262597
ENSG00000105323	HNRNPUL1	HNRNPUL1	0.573253	7.82066	0.000336001	0.00263269
ENSG00000169288	MRPL1	MRPL1	0.79597	6.70462	0.000339229	0.0026544
ENSG00000264364	DYNLL2	DYNLL2	0.790101	6.78685	0.000340117	0.00265507
ENSG00000127334	DYRK2	DYRK2	-0.752014	6.91935	0.000340229	0.00265507
ENSG00000087088	BAX	BAX	0.555924	8.1468	0.00034135	0.00266024
ENSG00000136161	RCBTB2	RCBTB2	-0.778121	6.12283	0.000342293	0.00266401
ENSG00000153094	BCL2L11	BCL2L11	0.925935	6.1185	0.000343915	0.00267306
ENSG00000251474	RPL32P3	RPL32P3	-0.738969	5.94714	0.000352904	0.00273925
ENSG00000146285	SCML4	SCML4	-0.629846	7.47866	0.000354163	0.00274169
ENSG00000281383	FP671120.5	FP671120.5	-0.930204	9.34384	0.000353894	0.00274169
ENSG00000168610	STAT3	STAT3	0.619425	7.6655	0.000358849	0.00276749
ENSG00000240972	MIF	MIF	0.571331	10.184	0.000358348	0.00276749
ENSG00000244879	GABPB1-AS1	GABPB1-AS1	-0.704399	8.00897	0.000358925	0.00276749
ENSG00000176018	LYSMD3	LYSMD3	0.705746	5.30659	0.000363957	0.00280256
ENSG00000100060	MFNG	MFNG	-0.706104	7.44957	0.000365668	0.00281201
ENSG00000185684	EP400P1	EP400P1	-0.876225	4.87573	0.000367187	0.00281996
ENSG00000120063	GNA13	GNA13	0.922004	6.23097	0.000383101	0.00293829
ENSG00000185507	IRF7	IRF7	0.863002	5.74541	0.000384193	0.00294278
ENSG00000136381	IREB2	IREB2	-0.807576	5.74873	0.000388504	0.00297188
ENSG00000072110	ACTN1	ACTN1	-1.28263	6.48762	0.000392149	0.00299581
ENSG00000072818	ACAP1	ACAP1	-0.611342	8.84867	0.000404511	0.00308619
ENSG00000123908	AGO2	AGO2	0.644974	6.69849	0.000406225	0.0030952
ENSG00000168273	SMIM4	SMIM4	0.792211	5.76664	0.000413898	0.00314953
ENSG00000113532	ST8SIA4	ST8SIA4	0.757016	5.80973	0.000416001	0.00316139
ENSG00000214106	PAXIP1-AS2	PAXIP1-AS2	-0.8086	5.31124	0.000420075	0.00318817
ENSG00000126524	SBDS	SBDS	0.764414	8.52354	0.00042158	0.00319542
ENSG00000134255	CEPT1	CEPT1	-0.87352	4.92112	0.000424104	0.00321036
ENSG00000224870	MRPL20-AS1	MRPL20-AS1	-0.881263	5.17116	0.000426187	0.00322193
ENSG00000023734	STRAP	STRAP	0.676618	7.65207	0.000430211	0.00324812
ENSG00000106399	RPA3	RPA3	0.678252	7.29364	0.000435692	0.00328511
ENSG00000082074	FYB1	FYB1	-0.554982	9.78082	0.000436808	0.00328511
ENSG00000149823	VPS51	VPS51	-0.817411	7.91835	0.000436612	0.00328511
ENSG00000172531	PPP1CA	PPP1CA	-0.620219	7.47609	0.000440747	0.00331045
ENSG00000123395	ATG101	ATG101	1.0304	5.95056	0.00044136	0.00331077
ENSG00000255198	SNHG9	SNHG9	0.65153	6.64575	0.000443958	0.00332404
ENSG00000104964	TLE5	TLE5	-0.589032	10.4303	0.000444274	0.00332404
ENSG00000149547	EI24	EI24	-0.728205	5.86476	0.000451408	0.00337307
ENSG00000100883	SRP54	SRP54	0.732322	6.30656	0.000453902	0.00337451
ENSG00000213465	ARL2	ARL2	-0.764778	5.58211	0.000453918	0.00337451
ENSG00000163322	ABRAXAS1	ABRAXAS1	-0.87748	6.48885	0.000453285	0.00337451
ENSG00000213380	COG8	COG8	-0.925682	4.32665	0.000453926	0.00337451
ENSG00000133985	TTC9	TTC9	-0.874509	6.07209	0.000457295	0.00339521
ENSG00000148248	SURF4	SURF4	0.720503	6.58127	0.000462428	0.00342894
ENSG00000204387	SNHG32	SNHG32	-0.882185	8.28629	0.00047212	0.00349634
ENSG00000197579	TOPORS	TOPORS	0.663534	6.31556	0.000479444	0.00353744
ENSG00000113282	CLINT1	CLINT1	0.608908	7.31896	0.00047914	0.00353744
ENSG00000273015	AC008124.1	AC008124.1	-0.796976	5.19087	0.000479498	0.00353744
ENSG00000124788	ATXN1	ATXN1	0.724539	6.01536	0.00048139	0.0035467
ENSG00000146842	TMEM209	TMEM209	-0.928034	5.12854	0.000481975	0.0035467
ENSG00000100422	CERK	CERK	0.645814	6.4812	0.000510152	0.0037493
ENSG00000078596	ITM2A	ITM2A	0.70242	8.77954	0.000512914	0.00376483
ENSG00000140092	FBLN5	FBLN5	-0.817063	6.40675	0.000513975	0.00376785
ENSG00000134602	STK26	STK26	0.623839	5.79784	0.000518044	0.00378335
ENSG00000143977	SNRPG	SNRPG	0.612937	8.5863	0.000517448	0.00378335
ENSG00000110958	PTGES3	PTGES3	0.573179	9.56288	0.000517343	0.00378335
ENSG00000095564	BTAF1	BTAF1	0.687729	5.60346	0.000524356	0.0038211
ENSG00000020426	MNAT1	MNAT1	0.668929	5.89687	0.000524529	0.0038211
ENSG00000090520	DNAJB11	DNAJB11	0.680567	5.53714	0.000533926	0.00388468
ENSG00000147439	BIN3	BIN3	-0.879135	5.34916	0.000537958	0.00390911
ENSG00000287979	AC253572.2	AC253572.2	1.12167	6.33999	0.00054921	0.0039859
ENSG00000168264	IRF2BP2	IRF2BP2	0.867081	7.54417	0.000551448	0.00399714
ENSG00000235162	C12orf75	C12orf75	0.698373	5.99697	0.00055365	0.00400809
ENSG00000129055	ANAPC13	ANAPC13	-0.725121	5.86228	0.000555017	0.00401299
ENSG00000160710	ADAR	ADAR	-0.630432	7.11406	0.000555835	0.0040139
ENSG00000076662	ICAM3	ICAM3	-0.594639	9.28595	0.000556719	0.00401529
ENSG00000125356	NDUFA1	NDUFA1	0.508152	9.48308	0.0005575	0.00401593
ENSG00000217555	CKLF	CKLF	0.870049	8.34227	0.000570851	0.00410529
ENSG00000260836	AC245033.1	AC245033.1	-0.622832	8.9849	0.000571318	0.00410529
ENSG00000149311	ATM	ATM	-0.692464	8.21277	0.00057423	0.00412111
ENSG00000176463	SLCO3A1	SLCO3A1	0.665607	5.45651	0.000605117	0.00433742
ENSG00000249437	NAIP	NAIP	-0.928815	5.12918	0.000607497	0.00434911
ENSG00000167895	TMC8	TMC8	-0.769502	7.38137	0.000611801	0.00437453
ENSG00000023902	PLEKHO1	PLEKHO1	0.821658	6.75122	0.000614527	0.00437785
ENSG00000104408	EIF3E	EIF3E	-0.771935	10.5997	0.000614295	0.00437785
ENSG00000100083	GGA1	GGA1	-0.807397	6.12632	0.000614414	0.00437785
ENSG00000103966	EHD4	EHD4	0.784791	5.6077	0.000622303	0.00441698
ENSG00000113851	CRBN	CRBN	-0.617463	7.27762	0.000622168	0.00441698
ENSG00000171135	JAGN1	JAGN1	-0.696673	6.71194	0.00062113	0.00441698
ENSG00000161011	SQSTM1	SQSTM1	1.11549	7.73906	0.000625985	0.00443228
ENSG00000026508	CD44	CD44	0.507903	9.02943	0.000625237	0.00443228
ENSG00000163728	TTC14	TTC14	-0.711178	7.70826	0.000634506	0.00447753
ENSG00000180011	ZADH2	ZADH2	-0.845519	5.77233	0.000633728	0.00447753
ENSG00000254536	AL360181.3	AL360181.3	-0.846762	5.02678	0.00063469	0.00447753
ENSG00000160953	PWWP3A	PWWP3A	0.680402	4.88506	0.000635559	0.00447822
ENSG00000283515	AC020915.5	AC020915.5	0.65346	4.86395	0.000638512	0.00449358
ENSG00000124784	RIOK1	RIOK1	0.693508	5.88263	0.000639541	0.00449537
ENSG00000154473	BUB3	BUB3	0.533162	8.03137	0.000659542	0.00463036
ENSG00000122481	RWDD3	RWDD3	-0.804015	5.82284	0.000661105	0.00463572
ENSG00000111229	ARPC3	ARPC3	0.559684	9.6274	0.000664516	0.00465402
ENSG00000107742	SPOCK2	SPOCK2	0.51936	9.4279	0.000667301	0.00466789
ENSG00000178802	MPI	MPI	-1.17473	5.08736	0.000670521	0.00468477
ENSG00000188994	ZNF292	ZNF292	-0.715954	7.58363	0.00067149	0.00468591
ENSG00000184983	NDUFA6	NDUFA6	0.633996	7.71979	0.000676559	0.00471561
ENSG00000177981	ASB8	ASB8	-0.666511	6.3067	0.000677691	0.00471783
ENSG00000100796	PPP4R3A	PPP4R3A	0.653216	6.92345	0.000682465	0.00473404
ENSG00000177192	PUS1	PUS1	-0.822836	5.07499	0.000682116	0.00473404
ENSG00000196187	TMEM63A	TMEM63A	-0.825562	6.14287	0.000682114	0.00473404
ENSG00000101224	CDC25B	CDC25B	-0.778746	6.68055	0.000687855	0.00476573
ENSG00000105401	CDC37	CDC37	0.505525	8.38984	0.00069427	0.00479302
ENSG00000162419	GMEB1	GMEB1	-0.785558	5.40758	0.000693644	0.00479302
ENSG00000072736	NFATC3	NFATC3	-0.813353	6.26569	0.000692971	0.00479302
ENSG00000102178	UBL4A	UBL4A	-0.709464	5.69216	0.000698418	0.00481593
ENSG00000103550	KNOP1	KNOP1	-0.776541	5.84567	0.000701393	0.00483071
ENSG00000147996	CBWD5	CBWD5	0.653366	6.40866	0.000706005	0.00485671
ENSG00000115525	ST3GAL5	ST3GAL5	0.670381	5.29588	0.000715262	0.00491457
ENSG00000077238	IL4R	IL4R	0.6574	5.87563	0.000716178	0.00491505
ENSG00000123444	KBTBD4	KBTBD4	-0.774082	5.06594	0.00071952	0.00493215
ENSG00000187838	PLSCR3	PLSCR3	-0.688493	6.00412	0.000735555	0.00503245
ENSG00000235989	MORC2-AS1	MORC2-AS1	-0.964506	4.88984	0.000735886	0.00503245
ENSG00000262481	TMEM256-PLSCR3	TMEM256-PLSCR3	-0.695789	5.98696	0.00076289	0.00521099
ENSG00000109390	NDUFC1	NDUFC1	-0.621422	7.7786	0.000772452	0.0052701
ENSG00000147155	EBP	EBP	0.641417	5.74164	0.000782132	0.00532988
ENSG00000109787	KLF3	KLF3	0.688757	8.30326	0.000784867	0.00534225
ENSG00000147813	NAPRT	NAPRT	-0.811243	5.6796	0.000787944	0.00535691
ENSG00000110046	ATG2A	ATG2A	0.669006	5.32427	0.000792502	0.0053816
ENSG00000152457	DCLRE1C	DCLRE1C	-0.87796	4.50018	0.000797021	0.00540596
ENSG00000170473	PYM1	PYM1	-0.822619	5.85296	0.000800739	0.00542484
ENSG00000102908	NFAT5	NFAT5	0.606771	5.28911	0.000812629	0.00549898
ENSG00000069974	RAB27A	RAB27A	0.667422	6.40819	0.000818296	0.00553088
ENSG00000185262	UBALD2	UBALD2	0.593316	8.95658	0.000827213	0.00558077
ENSG00000160446	ZDHHC12	ZDHHC12	-0.701864	6.15636	0.0008276	0.00558077
ENSG00000166598	HSP90B1	HSP90B1	0.532396	8.67158	0.000829884	0.00558968
ENSG00000180370	PAK2	PAK2	0.562899	8.5712	0.000831933	0.00559699
ENSG00000165476	REEP3	REEP3	0.783819	6.19368	0.000842641	0.00566247
ENSG00000083223	TUT7	TUT7	0.74707	6.10344	0.000845461	0.00567485
ENSG00000106546	AHR	AHR	0.886931	5.07731	0.000848438	0.0056817
ENSG00000080371	RAB21	RAB21	0.608499	7.33209	0.00084826	0.0056817
ENSG00000156639	ZFAND3	ZFAND3	0.641182	5.53649	0.000852765	0.0057041
ENSG00000198791	CNOT7	CNOT7	-0.62753	7.25807	0.000854116	0.00570655
ENSG00000127311	HELB	HELB	0.71588	6.02473	0.000870433	0.00580889
ENSG00000285106	AC016831.7	AC016831.7	0.879277	3.96637	0.000872404	0.00581536
ENSG00000117298	ECE1	ECE1	-0.768589	4.93553	0.000879414	0.00585536
ENSG00000102119	EMD	EMD	0.591032	6.93158	0.000897629	0.0059698
ENSG00000163297	ANTXR2	ANTXR2	0.713748	5.76997	0.00090219	0.00599327
ENSG00000076554	TPD52	TPD52	0.64018	5.41694	0.000918263	0.00609307
ENSG00000172725	CORO1B	CORO1B	0.547225	10.4876	0.000922983	0.0061174
ENSG00000246451	AL049840.1	AL049840.1	-0.757897	5.38563	0.000924884	0.00612301
ENSG00000175220	ARHGAP1	ARHGAP1	-0.835986	5.03999	0.000931155	0.0061575
ENSG00000110934	BIN2	BIN2	-0.588508	8.2396	0.000945375	0.00624442
ENSG00000152234	ATP5F1A	ATP5F1A	-0.574386	8.56938	0.000946857	0.0062471
ENSG00000241837	ATP5PO	ATP5PO	-0.546728	9.29291	0.000948348	0.00624984
ENSG00000136758	YME1L1	YME1L1	0.60213	8.48223	0.000954213	0.00628136
ENSG00000133460	SLC2A11	SLC2A11	-0.847141	4.83338	0.000959835	0.00631122
ENSG00000083099	LYRM2	LYRM2	-0.741435	6.11821	0.000964137	0.00633233
ENSG00000125740	FOSB	FOSB	0.77086	9.45907	0.000980727	0.00643401
ENSG00000152256	PDK1	PDK1	-1.07348	6.09119	0.000983798	0.00644688
ENSG00000139644	TMBIM6	TMBIM6	0.510258	9.4819	0.000986082	0.00645456
ENSG00000215472	RPL17-C18orf32	RPL17-C18orf32	-0.515294	12.2229	0.000987376	0.00645575
ENSG00000198089	SFI1	SFI1	-0.767658	6.0857	0.000989771	0.00645687
ENSG00000125954	CHURC1-FNTB	CHURC1-FNTB	-0.795765	4.7152	0.000988803	0.00645687
ENSG00000101367	MAPRE1	MAPRE1	0.560386	7.00532	0.000996607	0.00649035
ENSG00000143633	C1orf131	C1orf131	-0.681196	6.54514	0.000997139	0.00649035
ENSG00000145736	GTF2H2	GTF2H2	-0.729539	5.64322	0.00100609	0.00654125
ENSG00000136717	BIN1	BIN1	-0.520583	8.47757	0.00101468	0.00658975
ENSG00000159593	NAE1	NAE1	-0.680315	6.8126	0.00103333	0.0066959
ENSG00000235527	HIPK1-AS1	HIPK1-AS1	-0.87185	4.86027	0.00103317	0.0066959
ENSG00000146109	ABT1	ABT1	-0.647303	6.52683	0.00103716	0.00671324
ENSG00000168564	CDKN2AIP	CDKN2AIP	0.649344	6.72763	0.00105027	0.00677619
ENSG00000279738	AL022311.1	AL022311.1	-0.702796	5.79182	0.00104988	0.00677619
ENSG00000175727	MLXIP	MLXIP	-0.751627	6.49473	0.00105039	0.00677619
ENSG00000157306	ZFHX2-AS1	ZFHX2-AS1	-0.747364	5.16107	0.00106892	0.00688806
ENSG00000138964	PARVG	PARVG	0.646749	5.58215	0.00107933	0.00694741
ENSG00000264058	AC073508.2	AC073508.2	-0.723535	5.19604	0.00108665	0.00698678
ENSG00000166012	TAF1D	TAF1D	0.542109	9.09151	0.00110839	0.00711738
ENSG00000139428	MMAB	MMAB	-0.774217	5.1373	0.00110941	0.00711738
ENSG00000203880	PCMTD2	PCMTD2	-0.730628	5.34625	0.00111652	0.0071551
ENSG00000153046	CDYL	CDYL	0.578874	5.20426	0.0011286	0.00722452
ENSG00000185477	GPRIN3	GPRIN3	0.620445	7.20524	0.00113767	0.0072746
ENSG00000064201	TSPAN32	TSPAN32	-1.13344	5.58841	0.00114494	0.00731298
ENSG00000204261	PSMB8-AS1	PSMB8-AS1	-0.657159	6.24816	0.0011547	0.00736723
ENSG00000168522	FNTA	FNTA	-0.6086	6.84906	0.00115877	0.00738509
ENSG00000248167	TRIM39-RPP21	TRIM39-RPP21	0.612071	5.96959	0.00116108	0.00739167
ENSG00000185201	IFITM2	IFITM2	0.565371	11.3933	0.00118835	0.007557
ENSG00000142396	ERVK3-1	ERVK3-1	0.587542	5.77524	0.00119686	0.0076028
ENSG00000103510	KAT8	KAT8	-0.714333	6.0607	0.00120268	0.00763143
ENSG00000237296	SMG1P1	SMG1P1	0.697173	4.27425	0.00121262	0.00766759
ENSG00000182173	TSEN54	TSEN54	0.591076	6.1341	0.00121181	0.00766759
ENSG00000198000	NOL8	NOL8	-0.70759	5.77914	0.00121378	0.00766759
ENSG00000242086	MUC20-OT1	MUC20-OT1	-0.754322	5.61411	0.00121169	0.00766759
ENSG00000164062	APEH	APEH	-0.825652	5.50238	0.00121498	0.00766759
ENSG00000168234	TTC39C	TTC39C	0.560721	7.57122	0.00121876	0.00768308
ENSG00000185947	ZNF267	ZNF267	0.755731	5.91117	0.00122888	0.00772171
ENSG00000123933	MXD4	MXD4	0.678036	7.35877	0.0012284	0.00772171
ENSG00000164022	AIMP1	AIMP1	-0.557505	7.70384	0.00122752	0.00772171
ENSG00000205155	PSENEN	PSENEN	0.606013	5.6185	0.00123589	0.00775739
ENSG00000070961	ATP2B1	ATP2B1	0.542724	7.3725	0.00123742	0.0077586
ENSG00000174946	GPR171	GPR171	0.807936	7.82802	0.00123972	0.00776465
ENSG00000250303	AP002884.1	AP002884.1	-0.915899	5.31816	0.00125078	0.00782549
ENSG00000112249	ASCC3	ASCC3	0.722845	6.28381	0.00126205	0.00788746
ENSG00000134352	IL6ST	IL6ST	-0.696609	8.30006	0.00126568	0.00790163
ENSG00000122068	FYTTD1	FYTTD1	0.567476	6.81275	0.00128518	0.00801475
ENSG00000168566	SNRNP48	SNRNP48	-0.709772	5.78925	0.00130049	0.00809285
ENSG00000247315	ZCCHC3	ZCCHC3	-0.851373	5.12018	0.00130026	0.00809285
ENSG00000090061	CCNK	CCNK	0.667231	5.66054	0.00130326	0.00810145
ENSG00000163312	HELQ	HELQ	-0.74591	5.60519	0.0013074	0.00811844
ENSG00000169032	MAP2K1	MAP2K1	0.570664	6.12426	0.0013253	0.00822083
ENSG00000132646	PCNA	PCNA	0.895665	5.70733	0.00132673	0.00822091
ENSG00000140264	SERF2	SERF2	0.478343	11.2469	0.00133934	0.00829022
ENSG00000215068	AC025171.2	AC025171.2	-0.973956	5.04841	0.00136276	0.00842618
ENSG00000117450	PRDX1	PRDX1	0.667631	8.69618	0.00137275	0.00847892
ENSG00000135926	TMBIM1	TMBIM1	0.742826	5.75806	0.0013784	0.00850478
ENSG00000133884	DPF2	DPF2	-0.67966	5.77423	0.00139129	0.00857518
ENSG00000122026	RPL21	RPL21	-0.715792	14.163	0.00140114	0.00862672
ENSG00000143851	PTPN7	PTPN7	0.700824	6.50512	0.00141856	0.00872473
ENSG00000258429	PDF	PDF	-0.928771	3.67001	0.00143758	0.00883236
ENSG00000119403	PHF19	PHF19	0.751832	5.13353	0.00145095	0.00890508
ENSG00000071051	NCK2	NCK2	-0.577974	8.74188	0.00145763	0.00893663
ENSG00000103423	DNAJA3	DNAJA3	-0.693535	5.38299	0.00146736	0.00898681
ENSG00000152193	RNF219	RNF219	-0.888511	5.11613	0.0014709	0.00899897
ENSG00000120533	ENY2	ENY2	0.508485	7.96452	0.00149644	0.00914561
ENSG00000120509	PDZD11	PDZD11	0.797109	5.40752	0.00150744	0.00920317
ENSG00000251229	AL645924.2	AL645924.2	-0.920626	6.04278	0.00153586	0.00936682
ENSG00000106560	GIMAP2	GIMAP2	-0.594185	7.36334	0.00154056	0.00938559
ENSG00000174446	SNAPC5	SNAPC5	-0.674233	5.3384	0.0015551	0.00946427
ENSG00000136560	TANK	TANK	0.848788	7.0068	0.00155911	0.00947874
ENSG00000093167	LRRFIP2	LRRFIP2	0.567477	5.79005	0.00157956	0.00959299
ENSG00000007264	MATK	MATK	0.715787	6.19744	0.00158266	0.00960182
ENSG00000007392	LUC7L	LUC7L	0.573343	5.9994	0.00159335	0.00965658
ENSG00000161010	MRNIP	MRNIP	-0.737447	4.91154	0.00160207	0.00969926
ENSG00000171735	CAMTA1	CAMTA1	0.579804	6.27549	0.00160389	0.00970017
ENSG00000145022	TCTA	TCTA	-0.820974	5.09986	0.00161356	0.00974849
ENSG00000184508	HDDC3	HDDC3	-0.623857	6.32718	0.00162258	0.00979284
ENSG00000160584	SIK3	SIK3	0.620131	5.7889	0.00164148	0.00989658
ENSG00000100938	GMPR2	GMPR2	-0.61413	6.34302	0.00164836	0.00992779
ENSG00000189376	C8orf76	C8orf76	-0.743461	5.02641	0.00166652	0.0100268
ENSG00000100697	DICER1	DICER1	-0.651123	6.03277	0.00168055	0.0101007
ENSG00000163516	ANKZF1	ANKZF1	-0.783167	6.27584	0.00168844	0.0101376
ENSG00000187193	MT1X	MT1X	0.792917	7.08427	0.00169614	0.0101733
ENSG00000163565	IFI16	IFI16	0.691283	8.10561	0.00170586	0.0102211
ENSG00000008294	SPAG9	SPAG9	0.835085	6.53296	0.00174199	0.0103733
ENSG00000105939	ZC3HAV1	ZC3HAV1	0.51647	8.77879	0.00174166	0.0103733
ENSG00000166888	STAT6	STAT6	-0.659239	5.50787	0.00174143	0.0103733
ENSG00000100075	SLC25A1	SLC25A1	-0.688763	5.46549	0.00174194	0.0103733
ENSG00000073849	ST6GAL1	ST6GAL1	-0.717648	5.96438	0.00173415	0.0103733
ENSG00000138443	ABI2	ABI2	-0.743771	4.97013	0.00173945	0.0103733
ENSG00000107679	PLEKHA1	PLEKHA1	-0.64861	6.99105	0.0017503	0.0104121
ENSG00000214022	REPIN1	REPIN1	-0.801981	4.88459	0.00176054	0.0104623
ENSG00000176102	CSTF3	CSTF3	-0.80784	4.55323	0.00176472	0.0104765
ENSG00000108091	CCDC6	CCDC6	0.558323	5.70196	0.00176953	0.0104943
ENSG00000130741	EIF2S3	EIF2S3	-0.607381	9.0423	0.0017729	0.0105035
ENSG00000136710	CCDC115	CCDC115	-0.691681	6.60285	0.00177491	0.0105047
ENSG00000117543	DPH5	DPH5	-0.707822	6.68142	0.00179131	0.0105813
ENSG00000081059	TCF7	TCF7	-0.752456	7.79656	0.00179149	0.0105813
ENSG00000277147	LINC00869	LINC00869	0.544758	6.51474	0.00179494	0.0105909
ENSG00000236618	PITPNA-AS1	PITPNA-AS1	-0.59671	6.92782	0.0018039	0.010633
ENSG00000160218	TRAPPC10	TRAPPC10	0.527295	6.96193	0.00181661	0.010697
ENSG00000256950	AC069503.2	AC069503.2	-0.727985	5.31438	0.00181847	0.0106971
ENSG00000048544	MRPS10	MRPS10	-0.642747	6.11727	0.00182784	0.0107413
ENSG00000163788	SNRK	SNRK	0.566452	6.50603	0.00186009	0.0108835
ENSG00000183696	UPP1	UPP1	0.509379	8.51348	0.00186133	0.0108835
ENSG00000068831	RASGRP2	RASGRP2	-0.538002	8.09752	0.0018614	0.0108835
ENSG00000099326	MZF1	MZF1	-0.730547	5.20733	0.00185986	0.0108835
ENSG00000167220	HDHD2	HDHD2	-0.765307	5.12808	0.0018593	0.0108835
ENSG00000162971	TYW5	TYW5	-0.749319	5.14225	0.00187828	0.0109711
ENSG00000173163	COMMD1	COMMD1	0.58147	6.30301	0.00189569	0.0110617
ENSG00000182446	NPLOC4	NPLOC4	-0.81534	5.07788	0.00189791	0.0110635
ENSG00000153015	CWC27	CWC27	-0.648814	6.23132	0.0019076	0.0111088
ENSG00000147408	CSGALNACT1	CSGALNACT1	-0.635867	6.21029	0.00191779	0.011157
ENSG00000154027	AK5	AK5	-1.24073	5.75828	0.00194581	0.0113087
ENSG00000184613	NELL2	NELL2	-1.0247	6.6507	0.00196389	0.0114023
ENSG00000087087	SRRT	SRRT	0.745377	5.95838	0.00197057	0.0114297
ENSG00000010244	ZNF207	ZNF207	-0.577632	7.23182	0.00197331	0.0114306
ENSG00000155657	TTN	TTN	-0.893782	5.64255	0.00197467	0.0114306
ENSG00000165506	DNAAF2	DNAAF2	0.660957	5.57895	0.0019825	0.0114645
ENSG00000116685	KIAA2013	KIAA2013	-0.78334	5.30328	0.00201801	0.0116583
ENSG00000164088	PPM1M	PPM1M	-0.669475	5.32634	0.00203228	0.0117291
ENSG00000182108	DEXI	DEXI	-0.668034	5.71946	0.00203513	0.0117338
ENSG00000136279	DBNL	DBNL	-0.588368	7.50211	0.00208698	0.0120209
ENSG00000131323	TRAF3	TRAF3	0.580601	5.50237	0.00209968	0.012082
ENSG00000136167	LCP1	LCP1	0.608057	9.01399	0.0021041	0.0120955
ENSG00000204209	DAXX	DAXX	-0.699858	5.64848	0.00211014	0.0121104
ENSG00000137547	MRPL15	MRPL15	-0.771109	5.39917	0.00211087	0.0121104
ENSG00000143321	HDGF	HDGF	0.61294	6.78866	0.00212409	0.0121622
ENSG00000106263	EIF3B	EIF3B	-0.605356	6.90764	0.00212371	0.0121622
ENSG00000281887	GIMAP1-GIMAP5	GIMAP1-GIMAP5	-0.767621	5.90819	0.00213279	0.0122
ENSG00000111711	GOLT1B	GOLT1B	0.673114	5.37307	0.00213721	0.0122012
ENSG00000181035	SLC25A42	SLC25A42	-0.779623	4.78414	0.0021355	0.0122012
ENSG00000114423	CBLB	CBLB	0.699465	6.10339	0.00214604	0.0122396
ENSG00000146802	TMEM168	TMEM168	-0.672391	5.16074	0.00216544	0.0123261
ENSG00000083844	ZNF264	ZNF264	-0.824135	5.88664	0.00216545	0.0123261
ENSG00000171451	DSEL	DSEL	-0.912725	5.61254	0.00216949	0.012337
ENSG00000286112	AL441992.2	AL441992.2	-0.787564	4.64925	0.00217373	0.012349
ENSG00000084090	STARD7	STARD7	0.695221	5.70985	0.00217744	0.012358
ENSG00000152061	RABGAP1L	RABGAP1L	0.77545	5.6368	0.00218563	0.0123803
ENSG00000232838	PET117	PET117	-0.735286	4.75007	0.00218514	0.0123803
ENSG00000104312	RIPK2	RIPK2	0.743159	6.34394	0.00219674	0.0124311
ENSG00000165175	MID1IP1	MID1IP1	1.23087	6.5092	0.00222898	0.0126012
ENSG00000159445	THEM4	THEM4	-0.529577	7.4778	0.00225709	0.0127478
ENSG00000189067	LITAF	LITAF	0.47945	8.71459	0.00229834	0.0129681
ENSG00000138795	LEF1	LEF1	-0.837439	8.37421	0.00230753	0.0130073
ENSG00000285410	GABPB1-IT1	GABPB1-IT1	-0.599234	6.91831	0.00231145	0.0130168
ENSG00000114779	ABHD14B	ABHD14B	-0.600337	6.13389	0.00239002	0.0134345
ENSG00000114626	ABTB1	ABTB1	-0.645993	6.56991	0.00239025	0.0134345
ENSG00000204922	UQCC3	UQCC3	-0.592499	6.21674	0.00240425	0.0135001
ENSG00000111707	SUDS3	SUDS3	0.531899	6.38582	0.00241552	0.0135371
ENSG00000221923	ZNF880	ZNF880	-0.661797	5.26893	0.00241384	0.0135371
ENSG00000136754	ABI1	ABI1	0.555238	6.62517	0.00243308	0.0136224
ENSG00000153113	CAST	CAST	0.629623	8.80185	0.00244619	0.0136827
ENSG00000130312	MRPL34	MRPL34	-0.536489	7.76199	0.0024796	0.0138562
ENSG00000123562	MORF4L2	MORF4L2	0.66548	6.43342	0.00248348	0.0138645
ENSG00000147604	RPL7	RPL7	-0.611259	12.5583	0.00248839	0.0138786
ENSG00000120675	DNAJC15	DNAJC15	0.534449	7.32577	0.00249594	0.013894
ENSG00000108561	C1QBP	C1QBP	-0.501477	8.54483	0.00249527	0.013894
ENSG00000108061	SHOC2	SHOC2	0.586975	5.83887	0.0025409	0.0141106
ENSG00000254635	WAC-AS1	WAC-AS1	-0.681938	6.44554	0.00254017	0.0141106
ENSG00000256683	ZNF350	ZNF350	-0.871078	4.96906	0.00254215	0.0141106
ENSG00000021300	PLEKHB1	PLEKHB1	-0.775145	5.66589	0.00255107	0.0141466
ENSG00000122694	GLIPR2	GLIPR2	0.785709	6.84091	0.00256065	0.0141862
ENSG00000180822	PSMG4	PSMG4	-0.759538	6.57716	0.00262711	0.0145405
ENSG00000175054	ATR	ATR	-0.731471	5.38751	0.0026439	0.0146195
ENSG00000082701	GSK3B	GSK3B	0.617893	5.90902	0.00265777	0.0146822
ENSG00000203667	COX20	COX20	0.544778	7.58893	0.00266253	0.014692
ENSG00000143486	EIF2D	EIF2D	-0.716421	6.25156	0.00266461	0.014692
ENSG00000119596	YLPM1	YLPM1	-0.733165	5.18633	0.00266985	0.014707
ENSG00000136936	XPA	XPA	-0.698291	7.26236	0.00272418	0.014992
ENSG00000083937	CHMP2B	CHMP2B	0.542749	6.59607	0.00272721	0.0149945
ENSG00000132300	PTCD3	PTCD3	-0.604879	6.11972	0.00274505	0.0150783
ENSG00000149136	SSRP1	SSRP1	-0.662996	5.94876	0.00275026	0.0150926
ENSG00000092871	RFFL	RFFL	-0.683769	5.36802	0.00275628	0.0151114
ENSG00000171456	ASXL1	ASXL1	0.540157	6.52892	0.0027693	0.0151467
ENSG00000162642	C1orf52	C1orf52	0.514762	6.48892	0.00277054	0.0151467
ENSG00000183891	TTC32	TTC32	-0.804074	6.02953	0.0027674	0.0151467
ENSG00000053770	AP5M1	AP5M1	-0.697274	4.97464	0.00279948	0.0152905
ENSG00000150316	CWC15	CWC15	-0.514007	7.41104	0.00282243	0.0154013
ENSG00000116459	ATP5PB	ATP5PB	-0.481813	7.98915	0.00283239	0.0154412
ENSG00000139641	ESYT1	ESYT1	-0.658938	6.22172	0.00283744	0.0154542
ENSG00000151882	CCL28	CCL28	-0.791223	5.0485	0.00284745	0.0154942
ENSG00000125107	CNOT1	CNOT1	0.513051	6.45262	0.00285552	0.0155236
ENSG00000131196	NFATC1	NFATC1	0.620876	5.03557	0.00288462	0.0156671
ENSG00000134758	RNF138	RNF138	0.823285	6.59445	0.0029446	0.0159779
ENSG00000204438	GPANK1	GPANK1	-0.590184	6.01173	0.00297416	0.0161232
ENSG00000181904	C5orf24	C5orf24	-0.566474	6.40108	0.00298934	0.0161904
ENSG00000163946	TASOR	TASOR	-0.582818	6.50669	0.00300998	0.016287
ENSG00000162739	SLAMF6	SLAMF6	-0.771568	5.80003	0.0030267	0.0163622
ENSG00000142168	SOD1	SOD1	0.520072	10.0052	0.00304822	0.0164632
ENSG00000153310	FAM49B	FAM49B	0.472282	7.57809	0.00305928	0.0165076
ENSG00000265681	RPL17	RPL17	-0.593814	13.1641	0.00307728	0.0165893
ENSG00000119950	MXI1	MXI1	0.594059	7.07747	0.00308052	0.0165913
ENSG00000196312	MFSD14C	MFSD14C	-0.631708	6.22779	0.00310323	0.0166982
ENSG00000287697	Z99127.4	Z99127.4	0.558224	6.29684	0.00317343	0.0169952
ENSG00000053254	FOXN3	FOXN3	0.556149	5.39615	0.00316555	0.0169952
ENSG00000115232	ITGA4	ITGA4	0.536641	8.08115	0.00317392	0.0169952
ENSG00000196227	FAM217B	FAM217B	-0.663063	5.91552	0.00316578	0.0169952
ENSG00000124243	BCAS4	BCAS4	-0.733511	6.12411	0.00317612	0.0169952
ENSG00000140471	LINS1	LINS1	-0.817051	6.38782	0.00317315	0.0169952
ENSG00000182809	CRIP2	CRIP2	-0.866347	6.3577	0.00317892	0.0169952
ENSG00000128989	ARPP19	ARPP19	0.555731	6.62003	0.003191	0.0170441
ENSG00000090863	GLG1	GLG1	-0.536019	7.03644	0.00319603	0.0170553
ENSG00000234741	GAS5	GAS5	-0.64369	11.1779	0.00319948	0.017058
ENSG00000264343	NOTCH2NLA	NOTCH2NLA	0.77522	4.32396	0.00320585	0.0170636
ENSG00000072958	AP1M1	AP1M1	-0.655732	5.65825	0.0032064	0.0170636
ENSG00000102245	CD40LG	CD40LG	0.782271	7.83478	0.00321979	0.0171191
ENSG00000135049	AGTPBP1	AGTPBP1	0.56731	5.51594	0.00323903	0.0172057
ENSG00000116824	CD2	CD2	0.721393	9.9412	0.00326946	0.0173515
ENSG00000168813	ZNF507	ZNF507	-0.666953	4.99669	0.00327507	0.0173653
ENSG00000168802	CHTF8	CHTF8	-0.768597	4.4805	0.00328814	0.0174187
ENSG00000154822	PLCL2	PLCL2	0.570065	5.97301	0.0033114	0.0175259
ENSG00000251022	THAP9-AS1	THAP9-AS1	0.738624	4.79531	0.00336452	0.0177909
ENSG00000065135	GNAI3	GNAI3	0.551171	7.14396	0.00337211	0.0177986
ENSG00000101191	DIDO1	DIDO1	-0.626146	5.98096	0.00337134	0.0177986
ENSG00000151414	NEK7	NEK7	0.615864	5.85252	0.00337976	0.0178226
ENSG00000254870	ATP6V1G2-DDX39B	ATP6V1G2-DDX39B	-0.609809	5.69577	0.0033828	0.0178226
ENSG00000111863	ADTRP	ADTRP	-0.810833	6.19996	0.00338626	0.0178247
ENSG00000148229	POLE3	POLE3	0.59129	7.22378	0.00342473	0.0180038
ENSG00000134825	TMEM258	TMEM258	0.447519	9.21098	0.00342649	0.0180038
ENSG00000233093	LINC00892	LINC00892	1.07382	6.29671	0.00344065	0.0180455
ENSG00000248092	NNT-AS1	NNT-AS1	-0.66948	5.29771	0.00343761	0.0180455
ENSG00000144524	COPS7B	COPS7B	-0.686103	5.2832	0.00345551	0.0181071
ENSG00000186470	BTN3A2	BTN3A2	-0.517467	7.6993	0.00346672	0.0181495
ENSG00000135404	CD63	CD63	0.47034	8.13992	0.00347025	0.0181516
ENSG00000177663	IL17RA	IL17RA	-0.610309	5.75719	0.00349279	0.0182531
ENSG00000168175	MAPK1IP1L	MAPK1IP1L	0.632399	6.95651	0.00350906	0.0183216
ENSG00000166405	RIC3	RIC3	-0.729109	6.25813	0.00352538	0.0183903
ENSG00000175215	CTDSP2	CTDSP2	-0.579509	6.50642	0.00352991	0.0183974
ENSG00000157601	MX1	MX1	0.801522	6.01029	0.00354446	0.0184543
ENSG00000196792	STRN3	STRN3	0.535871	5.36434	0.00354718	0.0184543
ENSG00000108588	CCDC47	CCDC47	0.811723	6.01732	0.00356154	0.0185123
ENSG00000272501	AL662844.4	AL662844.4	-0.598111	6.86085	0.00356927	0.018536
ENSG00000115053	NCL	NCL	0.458187	9.95838	0.00359015	0.0186111
ENSG00000214262	ANKRD36BP1	ANKRD36BP1	-0.538341	6.99122	0.00358767	0.0186111
ENSG00000141664	ZCCHC2	ZCCHC2	0.599383	5.52265	0.00362089	0.0187537
ENSG00000137073	UBAP2	UBAP2	0.584252	5.73247	0.00367171	0.0189999
ENSG00000143740	SNAP47	SNAP47	0.789445	5.75942	0.00370222	0.0191278
ENSG00000215790	SLC35E2A	SLC35E2A	-0.802839	4.0641	0.003703	0.0191278
ENSG00000196873	CBWD3	CBWD3	0.61464	6.31555	0.00371609	0.0191783
ENSG00000106554	CHCHD3	CHCHD3	0.574087	6.20713	0.00374881	0.01933
ENSG00000196405	EVL	EVL	-0.465999	9.51074	0.00376137	0.0193775
ENSG00000028310	BRD9	BRD9	0.557742	6.84057	0.00377445	0.0194277
ENSG00000277150	F8A3	F8A3	-0.715506	5.35849	0.00379621	0.0195224
ENSG00000181274	FRAT2	FRAT2	0.567569	6.25478	0.00381483	0.0196008
ENSG00000162909	CAPN2	CAPN2	0.544268	7.52203	0.00381952	0.0196075
ENSG00000003056	M6PR	M6PR	-0.493641	7.72244	0.00383582	0.0196705
ENSG00000161405	IKZF3	IKZF3	-0.533907	7.54969	0.00383855	0.0196705
ENSG00000079805	DNM2	DNM2	0.581091	5.59548	0.00387482	0.0198039
ENSG00000184640	2009-09-01	2009-09-01	-0.523403	8.30048	0.00387185	0.0198039
ENSG00000135686	KLHL36	KLHL36	-0.626614	6.44113	0.00387041	0.0198039
ENSG00000177479	ARIH2	ARIH2	0.581705	6.51353	0.00388899	0.0198588
ENSG00000274769	AC016747.4	AC016747.4	-0.700338	4.96386	0.00394892	0.0201471
ENSG00000011275	RNF216	RNF216	-0.661383	6.69087	0.0039576	0.0201737
ENSG00000198900	TOP1	TOP1	0.611174	7.76619	0.00396968	0.0201998
ENSG00000153317	ASAP1	ASAP1	0.507318	6.01625	0.00396827	0.0201998
ENSG00000145703	IQGAP2	IQGAP2	0.473961	7.92287	0.00402084	0.0204422
ENSG00000095906	NUBP2	NUBP2	-0.574849	6.80199	0.00404892	0.020567
ENSG00000133422	MORC2	MORC2	-0.669536	6.06501	0.00408114	0.0207125
ENSG00000099875	MKNK2	MKNK2	0.688701	6.76546	0.00408911	0.0207348
ENSG00000078618	NRDC	NRDC	0.514513	6.64765	0.00413207	0.0209344
ENSG00000196459	TRAPPC2	TRAPPC2	-0.562475	6.37524	0.00415321	0.0210232
ENSG00000146909	NOM1	NOM1	0.579146	5.78359	0.00416131	0.0210458
ENSG00000091947	TMEM101	TMEM101	-0.691527	5.73664	0.00420156	0.0212309
ENSG00000185787	MORF4L1	MORF4L1	0.427111	9.14218	0.00421096	0.0212598
ENSG00000167118	URM1	URM1	-0.585811	6.53914	0.00423243	0.0213312
ENSG00000286140	DERPC	DERPC	-0.756497	4.28131	0.00422965	0.0213312
ENSG00000159086	PAXBP1	PAXBP1	0.526573	6.17857	0.00424547	0.0213783
ENSG00000078687	TNRC6C	TNRC6C	-0.722924	6.92961	0.00425459	0.0214057
ENSG00000168807	SNTB2	SNTB2	0.59314	5.7029	0.00426441	0.0214365
ENSG00000047849	MAP4	MAP4	0.719897	5.8437	0.00428774	0.0215165
ENSG00000155329	ZCCHC10	ZCCHC10	0.704032	5.87601	0.00428762	0.0215165
ENSG00000146830	GIGYF1	GIGYF1	-0.616797	6.02929	0.00434105	0.0217464
ENSG00000245164	LINC00861	LINC00861	-0.948917	7.22843	0.00434102	0.0217464
ENSG00000033800	PIAS1	PIAS1	-0.672488	6.57145	0.0043552	0.0217985
ENSG00000273841	TAF9	TAF9	-0.601212	5.95504	0.00438618	0.021897
ENSG00000102882	MAPK3	MAPK3	-0.611387	5.58538	0.00438308	0.021897
ENSG00000263276	AC020978.7	AC020978.7	-0.795042	4.53269	0.00438544	0.021897
ENSG00000105810	CDK6	CDK6	0.561479	6.58101	0.00439098	0.0219021
ENSG00000177613	CSTF2T	CSTF2T	-0.619144	5.16065	0.0044195	0.0220207
ENSG00000237945	LINC00649	LINC00649	-0.626848	5.27281	0.00442234	0.0220207
ENSG00000151657	KIN	KIN	-0.605181	6.3843	0.00443097	0.0220447
ENSG00000086504	MRPL28	MRPL28	-0.618496	5.38269	0.00444451	0.0220932
ENSG00000178685	PARP10	PARP10	-0.63696	5.81849	0.00446456	0.0221739
ENSG00000219200	RNASEK	RNASEK	0.457788	8.05056	0.00447766	0.0222199
ENSG00000035115	SH3YL1	SH3YL1	-0.53082	7.1565	0.004484	0.0222324
ENSG00000172175	MALT1	MALT1	0.473905	7.56419	0.00455281	0.0225351
ENSG00000107164	FUBP3	FUBP3	-0.714538	5.44331	0.00455108	0.0225351
ENSG00000179218	CALR	CALR	0.48843	9.32519	0.00457918	0.0226463
ENSG00000099204	ABLIM1	ABLIM1	-0.68411	6.75295	0.00459665	0.0227133
ENSG00000198833	UBE2J1	UBE2J1	0.581167	6.09042	0.00462503	0.0228147
ENSG00000135272	MDFIC	MDFIC	0.451685	8.30351	0.00462218	0.0228147
ENSG00000073803	MAP3K13	MAP3K13	0.603452	5.23299	0.00463736	0.0228561
ENSG00000033867	SLC4A7	SLC4A7	0.568878	6.96986	0.00465601	0.0228706
ENSG00000146963	LUC7L2	LUC7L2	0.504666	7.08294	0.00465377	0.0228706
ENSG00000110651	CD81	CD81	0.467613	8.67528	0.00464694	0.0228706
ENSG00000270170	NCBP2AS2	NCBP2AS2	-0.533735	7.69115	0.00465606	0.0228706
ENSG00000166925	TSC22D4	TSC22D4	-0.541722	6.29974	0.00466513	0.0228958
ENSG00000100395	L3MBTL2	L3MBTL2	-0.621302	5.20833	0.00467838	0.0229415
ENSG00000100614	PPM1A	PPM1A	0.551155	5.56033	0.00468444	0.0229518
ENSG00000142684	ZNF593	ZNF593	0.890535	5.6605	0.00469024	0.0229608
ENSG00000184897	H1FX	H1FX	0.545365	9.62073	0.00471376	0.023049
ENSG00000119723	COQ6	COQ6	-0.68596	4.86369	0.0047162	0.023049
ENSG00000134371	CDC73	CDC73	0.506624	6.64127	0.00475607	0.0232243
ENSG00000267321	SNHG30	SNHG30	-0.613424	6.22851	0.00477907	0.0233171
ENSG00000122218	COPA	COPA	0.549439	6.61155	0.00479938	0.0233965
ENSG00000104518	GSDMD	GSDMD	-0.515538	7.26613	0.00481195	0.0234381
ENSG00000111802	TDP2	TDP2	-0.634421	5.46352	0.00485396	0.0236229
ENSG00000174353	STAG3L3	STAG3L3	-0.671485	4.7987	0.00486014	0.0236331
ENSG00000170619	COMMD5	COMMD5	0.581188	5.07507	0.00492282	0.0239179
ENSG00000158195	WASF2	WASF2	-0.517455	8.49152	0.004959	0.0240735
ENSG00000109861	CTSC	CTSC	0.930967	7.3908	0.00513957	0.0249293
ENSG00000065882	TBC1D1	TBC1D1	0.552451	5.58589	0.00515379	0.0249358
ENSG00000165113	GKAP1	GKAP1	0.542871	5.75337	0.00514723	0.0249358
ENSG00000028277	POU2F2	POU2F2	-0.621091	6.4087	0.00515039	0.0249358
ENSG00000169764	UGP2	UGP2	0.478435	8.46099	0.00516335	0.0249612
ENSG00000183726	TMEM50A	TMEM50A	0.524057	8.20213	0.00517442	0.0249939
ENSG00000105699	LSR	LSR	0.514805	5.6881	0.00520133	0.025103
ENSG00000055044	NOP58	NOP58	0.456338	7.57914	0.00521272	0.0251371
ENSG00000171853	TRAPPC12	TRAPPC12	-0.677746	4.63655	0.00524413	0.0252676
ENSG00000148572	NRBF2	NRBF2	0.648189	6.55659	0.00526936	0.0253681
ENSG00000096080	MRPS18A	MRPS18A	-0.767091	5.25682	0.00533114	0.0256443
ENSG00000187608	ISG15	ISG15	0.763806	8.02235	0.00536504	0.025786
ENSG00000184436	THAP7	THAP7	-0.609019	6.45979	0.0053744	0.0258096
ENSG00000085491	SLC25A24	SLC25A24	0.515665	5.60775	0.00538785	0.0258528
ENSG00000165813	CCDC186	CCDC186	0.493672	7.1434	0.00541531	0.0259631
ENSG00000177917	ARL6IP6	ARL6IP6	0.502179	5.83889	0.00544021	0.0260553
ENSG00000162066	AMDHD2	AMDHD2	-0.643906	4.92404	0.00544352	0.0260553
ENSG00000132842	AP3B1	AP3B1	0.538216	5.93608	0.00545852	0.0261056
ENSG00000154016	GRAP	GRAP	-0.681807	5.49349	0.00549457	0.0262563
ENSG00000122566	HNRNPA2B1	HNRNPA2B1	0.402984	10.3415	0.0055322	0.0264033
ENSG00000053372	MRTO4	MRTO4	-0.66841	6.16304	0.00553442	0.0264033
ENSG00000175550	DRAP1	DRAP1	0.462101	8.57342	0.00555522	0.0264808
ENSG00000166822	TMEM170A	TMEM170A	0.502933	5.71418	0.00556235	0.026493
ENSG00000169740	ZNF32	ZNF32	-0.54093	6.70525	0.0055842	0.0265753
ENSG00000106028	SSBP1	SSBP1	-0.429275	8.6667	0.00561498	0.0266999
ENSG00000186687	LYRM7	LYRM7	-0.595388	5.78175	0.0056383	0.0267889
ENSG00000196204	RNF216P1	RNF216P1	-0.627522	5.73267	0.00566471	0.0268923
ENSG00000185950	IRS2	IRS2	0.980542	6.42789	0.00568882	0.0269847
ENSG00000169592	INO80E	INO80E	-0.634517	5.73267	0.00570749	0.0270512
ENSG00000100575	TIMM9	TIMM9	-0.520023	6.64418	0.00572496	0.0271118
ENSG00000101474	APMAP	APMAP	0.504065	6.37666	0.00578679	0.0273823
ENSG00000129347	KRI1	KRI1	-0.619449	5.05712	0.00582609	0.0275458
ENSG00000115935	WIPF1	WIPF1	0.533645	7.44872	0.00583991	0.0275887
ENSG00000172794	RAB37	RAB37	-0.654024	5.22461	0.00585709	0.0276474
ENSG00000149532	CPSF7	CPSF7	-0.617001	5.43419	0.00587397	0.0277045
ENSG00000168214	RBPJ	RBPJ	0.673423	7.30491	0.00593359	0.0279475
ENSG00000196646	ZNF136	ZNF136	-0.809024	5.29619	0.00593512	0.0279475
ENSG00000134516	DOCK2	DOCK2	0.515048	6.76793	0.00594928	0.0279915
ENSG00000204219	TCEA3	TCEA3	-0.935622	6.09378	0.00600631	0.0282369
ENSG00000135469	COQ10A	COQ10A	0.632453	5.18236	0.00605855	0.0284595
ENSG00000143772	ITPKB	ITPKB	0.498357	6.27538	0.00608594	0.0285651
ENSG00000079332	SAR1A	SAR1A	0.492255	6.90151	0.00610495	0.0286311
ENSG00000128731	HERC2	HERC2	0.52912	5.71766	0.00611443	0.0286525
ENSG00000169180	XPO6	XPO6	-0.678558	6.10013	0.00613006	0.0287025
ENSG00000143314	MRPL24	MRPL24	-0.591707	5.61585	0.00614952	0.0287704
ENSG00000147274	RBMX	RBMX	0.452896	7.18125	0.00621554	0.0290402
ENSG00000072786	STK10	STK10	-0.495699	7.11458	0.00621719	0.0290402
ENSG00000172007	RAB33B	RAB33B	0.50077	5.29781	0.00627039	0.0292417
ENSG00000167106	FAM102A	FAM102A	-0.521392	7.35736	0.00626869	0.0292417
ENSG00000168101	NUDT16L1	NUDT16L1	-0.506502	7.18345	0.00629562	0.0293358
ENSG00000126264	HCST	HCST	0.398431	10.6601	0.00630821	0.0293708
ENSG00000186222	BLOC1S4	BLOC1S4	-0.497125	7.5357	0.00632064	0.0294038
ENSG00000103061	SLC7A6OS	SLC7A6OS	-0.647909	5.17787	0.00632542	0.0294038
ENSG00000166432	ZMAT1	ZMAT1	-0.678207	5.477	0.00636745	0.0295755
ENSG00000172428	COPS9	COPS9	0.418538	8.77112	0.00638591	0.0296376
ENSG00000198176	TFDP1	TFDP1	0.524624	5.93311	0.00640648	0.0296856
ENSG00000266094	RASSF5	RASSF5	0.488949	7.45348	0.0064055	0.0296856
ENSG00000102054	RBBP7	RBBP7	0.494096	6.24714	0.00641775	0.0297141
ENSG00000130811	EIF3G	EIF3G	-0.437247	9.85307	0.00646952	0.0299299
ENSG00000237651	C2orf74	C2orf74	-0.619482	5.03972	0.00648996	0.0300006
ENSG00000163171	CDC42EP3	CDC42EP3	1.002	6.95686	0.00650015	0.0300238
ENSG00000139637	C12orf10	C12orf10	-0.526466	6.92032	0.0065336	0.0301543
ENSG00000093072	ADA2	ADA2	-0.700441	5.1904	0.00653906	0.0301555
ENSG00000179715	PCED1B	PCED1B	-0.678429	6.07706	0.00660814	0.0304499
ENSG00000137038	DMAC1	DMAC1	-0.514721	6.90784	0.00663551	0.0305518
ENSG00000112282	MED23	MED23	-0.602438	5.08993	0.00672041	0.0309182
ENSG00000066027	PPP2R5A	PPP2R5A	0.58897	6.63776	0.00673026	0.030939
ENSG00000132274	TRIM22	TRIM22	0.523291	7.18418	0.00676439	0.0310712
ENSG00000227039	ITGB2-AS1	ITGB2-AS1	-0.78365	6.15575	0.00679764	0.0311993
ENSG00000185104	FAF1	FAF1	0.472718	6.20011	0.0069141	0.0317087
ENSG00000104880	ARHGEF18	ARHGEF18	-0.801904	5.88419	0.00693194	0.0317655
ENSG00000185475	TMEM179B	TMEM179B	-0.517005	6.33738	0.00694597	0.0318047
ENSG00000284691	AC073111.4	AC073111.4	-0.679623	5.76899	0.00696046	0.0318459
ENSG00000101084	RAB5IF	RAB5IF	0.557385	7.40652	0.00698091	0.0319143
ENSG00000224578	HNRNPA1P48	HNRNPA1P48	0.544448	7.81235	0.0069943	0.0319503
ENSG00000121413	ZSCAN18	ZSCAN18	-0.684055	5.26104	0.00704311	0.0321481
ENSG00000132388	UBE2G1	UBE2G1	0.509485	6.45723	0.00706519	0.0321982
ENSG00000183808	RBM12B	RBM12B	-0.658133	4.57072	0.00706518	0.0321982
ENSG00000119929	CUTC	CUTC	-0.515291	6.3042	0.00712478	0.0324443
ENSG00000258315	C17orf49	C17orf49	0.506534	5.55004	0.00723361	0.0329141
ENSG00000104886	PLEKHJ1	PLEKHJ1	-0.544699	6.44964	0.00724737	0.0329509
ENSG00000188021	UBQLN2	UBQLN2	-0.533582	6.49573	0.00725745	0.0329709
ENSG00000172613	RAD9A	RAD9A	-0.638276	4.7046	0.00726864	0.0329959
ENSG00000184384	MAML2	MAML2	-0.541276	7.74139	0.00727579	0.0330025
ENSG00000089060	SLC8B1	SLC8B1	-0.641707	5.25518	0.00730613	0.0330885
ENSG00000198917	SPOUT1	SPOUT1	-0.695526	4.5501	0.00730454	0.0330885
ENSG00000158717	RNF166	RNF166	0.562714	6.28847	0.00732968	0.0331692
ENSG00000120688	WBP4	WBP4	-0.600709	5.7076	0.00734396	0.033208
ENSG00000025708	TYMP	TYMP	0.630081	6.38512	0.00736531	0.0332786
ENSG00000127084	FGD3	FGD3	-0.49502	6.79226	0.00737559	0.0332991
ENSG00000130193	THEM6	THEM6	-0.707733	4.16482	0.0073978	0.0333734
ENSG00000137955	RABGGTB	RABGGTB	0.491459	6.73595	0.00743337	0.0335079
ENSG00000065357	DGKA	DGKA	-0.569482	7.1485	0.00745752	0.0335646
ENSG00000273899	NOL12	NOL12	-0.606334	5.37656	0.00745393	0.0335646
ENSG00000066322	ELOVL1	ELOVL1	0.587161	5.58553	0.00748246	0.0336508
ENSG00000162408	NOL9	NOL9	-0.604774	5.83318	0.00750804	0.0337397
ENSG00000129235	TXNDC17	TXNDC17	0.656544	6.5856	0.00752466	0.0337429
ENSG00000034152	MAP2K3	MAP2K3	0.635656	5.99352	0.00751977	0.0337429
ENSG00000145569	OTULINL	OTULINL	0.62348	5.17631	0.00753201	0.0337429
ENSG00000132182	NUP210	NUP210	-0.557108	6.35932	0.00752946	0.0337429
ENSG00000129680	MAP7D3	MAP7D3	0.586913	5.37057	0.00754946	0.033795
ENSG00000165644	COMTD1	COMTD1	0.533625	6.10159	0.00757173	0.0338686
ENSG00000122008	POLK	POLK	-0.553206	5.8268	0.00765866	0.0342311
ENSG00000161939	RNASEK-C17orf49	RNASEK-C17orf49	0.481957	9.03519	0.00769784	0.0343533
ENSG00000274272	AC069281.2	AC069281.2	-0.623328	6.40037	0.00769311	0.0343533
ENSG00000187189	TSPYL4	TSPYL4	0.646514	6.22307	0.0077187	0.0343935
ENSG00000125534	PPDPF	PPDPF	0.402038	10.3117	0.00771383	0.0343935
ENSG00000159674	SPON2	SPON2	0.529758	5.01549	0.0077251	0.0343957
ENSG00000163754	GYG1	GYG1	0.54984	5.29974	0.00775435	0.034473
ENSG00000185278	ZBTB37	ZBTB37	-0.599134	5.33514	0.00775329	0.034473
ENSG00000140575	IQGAP1	IQGAP1	0.471046	7.67195	0.00779272	0.0346171
ENSG00000136450	SRSF1	SRSF1	-0.574749	6.28449	0.00780671	0.0346527
ENSG00000127838	PNKD	PNKD	-0.563427	6.06971	0.00783461	0.0347235
ENSG00000107890	ANKRD26	ANKRD26	-0.593006	5.87619	0.00783319	0.0347235
ENSG00000181467	RAP2B	RAP2B	0.536557	7.44201	0.00790398	0.0350042
ENSG00000145012	LPP	LPP	0.520807	6.28448	0.00794157	0.0351439
ENSG00000263753	LINC00667	LINC00667	-0.569956	5.94484	0.00801153	0.0354117
ENSG00000198700	IPO9	IPO9	-0.596291	5.64526	0.00801429	0.0354117
ENSG00000102710	SUPT20H	SUPT20H	-0.515094	6.34639	0.00810994	0.0358071
ENSG00000019995	ZRANB1	ZRANB1	0.550339	5.42537	0.00812636	0.0358523
ENSG00000112406	HECA	HECA	0.445197	7.53266	0.00817938	0.0360589
ENSG00000160813	PPP1R35	PPP1R35	-0.576837	6.94886	0.00819612	0.0361052
ENSG00000133114	GPALPP1	GPALPP1	-0.570412	5.39324	0.00820904	0.0361347
ENSG00000187688	TRPV2	TRPV2	-0.629513	5.63357	0.00825192	0.036296
ENSG00000217128	FNIP1	FNIP1	0.525007	4.91147	0.00838548	0.0367998
ENSG00000100941	PNN	PNN	-0.472582	8.82451	0.00838247	0.0367998
ENSG00000048740	CELF2	CELF2	-0.661518	9.33413	0.00838319	0.0367998
ENSG00000087470	DNM1L	DNM1L	0.490887	5.9723	0.00840763	0.0368505
ENSG00000149091	DGKZ	DGKZ	-0.542394	7.59567	0.00840974	0.0368505
ENSG00000204282	TNRC6C-AS1	TNRC6C-AS1	-0.683429	4.34464	0.008468	0.0370778
ENSG00000259956	RBM15B	RBM15B	-0.744214	5.72943	0.00847783	0.0370929
ENSG00000134597	RBMX2	RBMX2	-0.505319	6.54556	0.00855706	0.0374114
ENSG00000138688	KIAA1109	KIAA1109	0.483597	6.51696	0.00860588	0.0375965
ENSG00000174749	FAM241A	FAM241A	0.464272	6.06413	0.00861781	0.0376177
ENSG00000106771	TMEM245	TMEM245	-0.630271	5.71364	0.00862369	0.0376177
ENSG00000164631	ZNF12	ZNF12	-0.554578	5.3856	0.00863482	0.037638
ENSG00000109670	FBXW7	FBXW7	0.489416	6.59609	0.00866362	0.0377352
ENSG00000101391	CDK5RAP1	CDK5RAP1	0.572628	5.54657	0.0086823	0.0377882
ENSG00000173875	ZNF791	ZNF791	0.576144	6.61055	0.00870544	0.0378605
ENSG00000206573	THUMPD3-AS1	THUMPD3-AS1	-0.498777	6.4047	0.00874042	0.0379842
ENSG00000204568	MRPS18B	MRPS18B	-0.523849	6.676	0.00874823	0.0379897
ENSG00000248710	AC079594.2	AC079594.2	-0.695116	4.58083	0.0087735	0.0380709
ENSG00000255073	ZFP91-CNTF	ZFP91-CNTF	0.531827	4.58311	0.00881039	0.038174
ENSG00000139719	VPS33A	VPS33A	-0.65555	4.4521	0.00880844	0.038174
ENSG00000104131	EIF3J	EIF3J	0.583013	6.87033	0.00882597	0.038213
ENSG00000239713	APOBEC3G	APOBEC3G	0.537784	6.81234	0.00885594	0.0382856
ENSG00000117616	RSRP1	RSRP1	0.479505	8.41499	0.0088504	0.0382856
ENSG00000133106	EPSTI1	EPSTI1	0.699046	5.95218	0.00887473	0.0383383
ENSG00000106785	TRIM14	TRIM14	-0.592984	5.07979	0.00901263	0.0389051
ENSG00000108829	LRRC59	LRRC59	0.503259	4.85976	0.00904017	0.038995
ENSG00000105221	AKT2	AKT2	-0.654498	6.02324	0.00906179	0.0390592
ENSG00000105639	JAK3	JAK3	-0.520473	6.4154	0.00908141	0.0391147
ENSG00000198055	GRK6	GRK6	-0.48143	7.67237	0.00909099	0.039127
ENSG00000100485	SOS2	SOS2	0.501251	5.63978	0.00911122	0.0391791
ENSG00000130935	NOL11	NOL11	-0.527195	6.22211	0.00911659	0.0391791
ENSG00000047346	FAM214A	FAM214A	0.479067	5.47456	0.00915493	0.0392567
ENSG00000218739	CEBPZOS	CEBPZOS	-0.52164	6.22044	0.00915474	0.0392567
ENSG00000167257	RNF214	RNF214	-0.526601	5.83187	0.00914698	0.0392567
ENSG00000140740	UQCRC2	UQCRC2	-0.503357	7.35329	0.0091819	0.0393433
ENSG00000081087	OSTM1	OSTM1	0.46885	5.92383	0.00927633	0.0396819
ENSG00000234327	AC012146.1	AC012146.1	-0.60525	5.11125	0.00927914	0.0396819
ENSG00000119684	MLH3	MLH3	-0.617553	5.67159	0.00928144	0.0396819
ENSG00000160209	PDXK	PDXK	0.543923	5.45888	0.00929831	0.0396956
ENSG00000153187	HNRNPU	HNRNPU	0.424477	9.56749	0.00929685	0.0396956
ENSG00000163935	SFMBT1	SFMBT1	0.470628	5.76594	0.0093253	0.0397815
ENSG00000123338	NCKAP1L	NCKAP1L	-0.495542	6.42071	0.00936837	0.0399066
ENSG00000140853	NLRC5	NLRC5	-0.681303	5.98367	0.00936481	0.0399066
ENSG00000111642	CHD4	CHD4	0.627638	6.09509	0.00938284	0.039939
ENSG00000016864	GLT8D1	GLT8D1	-0.573655	5.77146	0.00940447	0.0399917
ENSG00000177034	MTX3	MTX3	-0.655243	5.1801	0.00940899	0.0399917
ENSG00000173960	UBXN2A	UBXN2A	0.702112	5.87919	0.00941626	0.0399933
ENSG00000159023	EPB41	EPB41	-0.421375	8.09536	0.00948005	0.0402348
ENSG00000171316	CHD7	CHD7	0.517408	5.77866	0.00951062	0.040335
ENSG00000256060	TRAPPC2B	TRAPPC2B	0.494944	5.01147	0.00953826	0.0403988
ENSG00000166169	POLL	POLL	-0.570456	5.11695	0.00953958	0.0403988
ENSG00000267680	ZNF224	ZNF224	-0.556208	5.57386	0.00957154	0.0405046
ENSG00000137497	NUMA1	NUMA1	-0.561332	6.44583	0.00959121	0.0405583
ENSG00000163349	HIPK1	HIPK1	0.518781	6.56322	0.00962178	0.040622
ENSG00000168067	MAP4K2	MAP4K2	-0.506685	6.10318	0.00962725	0.040622
ENSG00000197321	SVIL	SVIL	-0.532261	6.04616	0.00961934	0.040622
ENSG00000142544	CTU1	CTU1	-0.613211	5.40135	0.00963485	0.0406245
ENSG00000131931	THAP1	THAP1	-0.542225	5.61423	0.009665	0.0407221
ENSG00000171310	CHST11	CHST11	0.529867	6.77965	0.00971979	0.0408783
ENSG00000086589	RBM22	RBM22	0.517377	6.73631	0.00972321	0.0408783
ENSG00000164008	C1orf50	C1orf50	-0.680028	4.58065	0.00972123	0.0408783
ENSG00000261884	AC040162.1	AC040162.1	-0.574292	6.78863	0.00975125	0.0409666
ENSG00000089289	IGBP1	IGBP1	-0.401506	8.33913	0.00985349	0.0413661
ENSG00000128595	CALU	CALU	0.591094	4.99511	0.00996832	0.041818
ENSG00000125457	MIF4GD	MIF4GD	-0.580708	5.79008	0.010007	0.0419501
ENSG00000111581	NUP107	NUP107	-0.620041	5.29549	0.0100438	0.0420739
ENSG00000150527	MIA2	MIA2	0.498784	5.92662	0.0101155	0.0423436
ENSG00000270617	URGCP-MRPS24	URGCP-MRPS24	-0.468236	6.93732	0.0101386	0.0423813
ENSG00000267364	AC022706.1	AC022706.1	-0.544457	5.5423	0.0101391	0.0423813
ENSG00000269893	SNHG8	SNHG8	0.444362	10.2362	0.0102197	0.0426873
ENSG00000131370	SH3BP5	SH3BP5	-0.449583	7.82562	0.0102287	0.0426944
ENSG00000164898	FMC1	FMC1	0.588303	4.79547	0.0102593	0.0427159
ENSG00000067560	RHOA	RHOA	0.395833	9.15751	0.0102435	0.0427159
ENSG00000109452	INPP4B	INPP4B	-0.457717	7.67322	0.0102557	0.0427159
ENSG00000163682	RPL9	RPL9	-0.545581	12.585	0.0102633	0.0427159
ENSG00000145388	METTL14	METTL14	-0.589833	5.1604	0.010303	0.0428503
ENSG00000078269	SYNJ2	SYNJ2	0.494483	5.2827	0.0103505	0.0430173
ENSG00000243056	EIF4EBP3	EIF4EBP3	-0.677511	4.2836	0.0104023	0.0432017
ENSG00000163743	RCHY1	RCHY1	0.668893	5.54718	0.0104728	0.0434632
ENSG00000106415	GLCCI1	GLCCI1	0.522389	5.00484	0.0104854	0.0434846
ENSG00000108306	FBXL20	FBXL20	-0.540377	5.23759	0.0104946	0.0434916
ENSG00000106803	SEC61B	SEC61B	0.454252	8.88791	0.0105045	0.0435017
ENSG00000143183	TMCO1	TMCO1	0.537336	7.52776	0.0105608	0.0436723
ENSG00000123329	ARHGAP9	ARHGAP9	0.505505	6.92132	0.0105568	0.0436723
ENSG00000141971	MVB12A	MVB12A	-0.63318	4.52372	0.0105885	0.0437559
ENSG00000276612	FP565260.2	FP565260.2	-0.580228	4.93797	0.0106515	0.0439847
ENSG00000106603	COA1	COA1	0.497688	5.48285	0.0106879	0.0440304
ENSG00000221883	ARIH2OS	ARIH2OS	0.46934	5.39205	0.0106842	0.0440304
ENSG00000010810	FYN	FYN	0.415957	8.70265	0.0106751	0.0440304
ENSG00000100784	RPS6KA5	RPS6KA5	-0.512549	6.51038	0.0106999	0.0440304
ENSG00000189283	FHIT	FHIT	-0.956971	7.36367	0.0107005	0.0440304
ENSG00000158710	TAGLN2	TAGLN2	0.39731	8.91539	0.0107337	0.044136
ENSG00000179912	R3HDM2	R3HDM2	0.503479	7.57951	0.010778	0.0442866
ENSG00000204138	PHACTR4	PHACTR4	0.474977	6.05941	0.0107909	0.0443081
ENSG00000129083	COPB1	COPB1	0.562322	6.52959	0.010843	0.0444401
ENSG00000172239	PAIP1	PAIP1	0.485521	6.14456	0.0108431	0.0444401
ENSG00000122741	DCAF10	DCAF10	-0.576093	5.22364	0.0108459	0.0444401
ENSG00000140650	PMM2	PMM2	-0.527259	5.85721	0.0108962	0.0446145
ENSG00000005483	KMT2E	KMT2E	0.400426	8.87929	0.010929	0.0447028
ENSG00000237190	CDKN2AIPNL	CDKN2AIPNL	-0.587878	5.97753	0.0109332	0.0447028
ENSG00000135775	COG2	COG2	-0.542069	5.56675	0.0109507	0.0447431
ENSG00000154642	C21orf91	C21orf91	0.646795	5.35356	0.010981	0.0448353
ENSG00000082146	STRADB	STRADB	-0.725961	5.11877	0.0110327	0.0450148
ENSG00000163125	RPRD2	RPRD2	-0.514596	5.9828	0.0110557	0.0450769
ENSG00000111897	SERINC1	SERINC1	0.424539	6.97387	0.0110671	0.0450915
ENSG00000130726	TRIM28	TRIM28	-0.549116	6.98339	0.0110873	0.0451421
ENSG00000286219	AC242843.1	AC242843.1	0.612778	4.59452	0.0111087	0.0451975
ENSG00000139154	AEBP2	AEBP2	0.506244	5.19006	0.0111205	0.0452141
ENSG00000130159	ECSIT	ECSIT	-0.605891	5.59125	0.011198	0.0454974
ENSG00000104472	CHRAC1	CHRAC1	0.545918	6.62065	0.0112287	0.0455702
ENSG00000188820	CALHM6	CALHM6	-0.603695	4.78297	0.0112316	0.0455702
ENSG00000100401	RANGAP1	RANGAP1	0.480642	5.49995	0.0112867	0.0457618
ENSG00000054118	THRAP3	THRAP3	-0.451137	8.03063	0.0113235	0.0458205
ENSG00000114503	NCBP2	NCBP2	-0.510668	6.432	0.0113249	0.0458205
ENSG00000061273	HDAC7	HDAC7	-0.568871	5.84456	0.0113208	0.0458205
ENSG00000145365	TIFA	TIFA	0.886415	5.5723	0.0113538	0.0459002
ENSG00000287978	AC245407.2	AC245407.2	-0.589187	7.03327	0.0113604	0.0459002
ENSG00000131797	CLUHP3	CLUHP3	-0.60567	4.98679	0.0113823	0.0459567
ENSG00000152291	TGOLN2	TGOLN2	-0.423494	7.90584	0.0114616	0.0461486
ENSG00000102897	LYRM1	LYRM1	-0.498499	6.0662	0.0114431	0.0461486
ENSG00000213928	IRF9	IRF9	-0.544302	6.53751	0.0114609	0.0461486
ENSG00000267426	AC087289.4	AC087289.4	-0.547547	5.71957	0.0114586	0.0461486
ENSG00000130764	LRRC47	LRRC47	-0.53453	5.57703	0.0115185	0.0463343
ENSG00000287608	AC022137.4	AC022137.4	-0.606242	5.29878	0.0115237	0.0463343
ENSG00000165714	BORCS5	BORCS5	0.568027	6.30924	0.0115705	0.046426
ENSG00000070756	PABPC1	PABPC1	0.415478	10.6086	0.0115705	0.046426
ENSG00000102109	PCSK1N	PCSK1N	-0.796823	5.71438	0.0115633	0.046426
ENSG00000048649	RSF1	RSF1	-0.446236	7.62696	0.0115995	0.0465102
ENSG00000172340	SUCLG2	SUCLG2	0.46463	5.69538	0.0117864	0.0471945
ENSG00000232859	LYRM9	LYRM9	-0.570768	4.80401	0.0117864	0.0471945
ENSG00000135845	PIGC	PIGC	-0.614976	5.40098	0.0118306	0.0473389
ENSG00000227057	WDR46	WDR46	-0.569242	6.24824	0.01184	0.0473439
ENSG00000168724	DNAJC21	DNAJC21	0.430125	7.48196	0.0118799	0.0474704
ENSG00000131475	VPS25	VPS25	-0.699798	5.35893	0.0118916	0.0474845
ENSG00000246223	LINC01550	LINC01550	-0.609348	6.1342	0.0119781	0.0477972
ENSG00000100359	SGSM3	SGSM3	-0.718101	5.19192	0.0120002	0.0478524
ENSG00000213523	SRA1	SRA1	0.680984	5.02958	0.0120346	0.047918
ENSG00000147050	KDM6A	KDM6A	0.515444	5.19362	0.0120348	0.047918
ENSG00000115234	SNX17	SNX17	-0.489518	7.07871	0.0120414	0.047918
ENSG00000198771	RCSD1	RCSD1	-0.390967	8.3938	0.0120859	0.0480622
ENSG00000143549	TPM3	TPM3	0.376598	9.62289	0.0121302	0.0481395
ENSG00000115808	STRN	STRN	-0.533548	5.69591	0.0121158	0.0481395
ENSG00000013364	MVP	MVP	-0.593846	6.35591	0.0121261	0.0481395
ENSG00000124795	DEK	DEK	0.44047	8.90522	0.0121906	0.0483459
ENSG00000136738	STAM	STAM	0.527468	5.48152	0.0122145	0.0484077
ENSG00000106328	FSCN3	FSCN3	-0.526118	6.51547	0.0122267	0.0484232
ENSG00000169018	FEM1B	FEM1B	-0.576694	5.3183	0.0123069	0.0486411
ENSG00000225973	PIGBOS1	PIGBOS1	-0.576844	5.26308	0.0122938	0.0486411
ENSG00000099725	PRKY	PRKY	-0.708218	6.38661	0.0123011	0.0486411
ENSG00000164308	ERAP2	ERAP2	-0.48284	7.11816	0.0123377	0.0487297
ENSG00000138468	SENP7	SENP7	0.522385	6.58331	0.0125745	0.0496312
ENSG00000101856	PGRMC1	PGRMC1	0.611889	5.56639	0.0126082	0.0497303
ENSG00000136444	RSAD1	RSAD1	-0.727239	5.62312	0.0126329	0.0497939
ENSG00000130338	TULP4	TULP4	0.521847	5.48149	0.0126807	0.0499015
ENSG00000004534	RBM6	RBM6	0.518666	6.44785	0.0126757	0.0499015
ENSG00000137710	RDX	RDX	0.494863	5.2171	0.0126902	0.0499015
ENSG00000148672	GLUD1	GLUD1	-0.501637	6.2177	0.0126945	0.0499015
ENSG00000168282	MGAT2	MGAT2	0.534677	6.02336	0.0127331	0.0499684
ENSG00000137880	GCHFR	GCHFR	0.483677	7.24157	0.0127374	0.0499684
ENSG00000259529	AL136295.5	AL136295.5	-0.644181	4.36963	0.0127238	0.0499684

## Sheet: CD8+ T-cells
Significantly differentially expressed Genes in CD8+ T-cell cluster Periphery vs PBMC
GeneId	Symbol	GeneName	log2FC	log2A	P.Value	adj.P.Val
ENSG00000204388	HSPA1B	HSPA1B	7.65198	10.9325	7.48765e-235	4.54126e-231
ENSG00000120875	DUSP4	DUSP4	4.84748	8.10533	4.64839e-63	4.69874e-60
ENSG00000173110	HSPA6	HSPA6	4.75089	7.78608	3.87864e-105	1.1762e-101
ENSG00000095794	CREM	CREM	4.56789	9.92122	2.82319e-40	1.14151e-37
ENSG00000202198	RF00100	RF00100	4.29162	8.8791	2.50974e-26	4.61259e-24
ENSG00000123358	NR4A1	NR4A1	4.16701	7.01307	3.21403e-75	4.87328e-72
ENSG00000283293	RN7SK	RN7SK	3.99302	7.75156	4.75729e-39	1.80331e-36
ENSG00000102760	RGCC	RGCC	3.77438	8.74324	3.39596e-79	6.86549e-76
ENSG00000130844	ZNF331	ZNF331	3.67846	8.93174	2.36288e-46	1.43309e-43
ENSG00000111537	IFNG	IFNG	3.30557	8.68308	6.90103e-24	9.51245e-22
ENSG00000232810	TNF	TNF	3.26495	7.1617	1.24043e-50	1.07474e-47
ENSG00000125657	TNFSF9	TNFSF9	3.23874	6.79761	2.07229e-22	2.51368e-20
ENSG00000120694	HSPH1	HSPH1	3.22264	8.22343	6.49536e-32	1.87192e-29
ENSG00000114541	FRMD4B	FRMD4B	3.2103	6.49518	1.75571e-67	2.12968e-64
ENSG00000116741	RGS2	RGS2	3.09479	7.99468	2.71802e-41	1.26806e-38
ENSG00000155307	SAMSN1	SAMSN1	3.05928	8.61132	5.46973e-36	1.746e-33
ENSG00000188483	IER5L	IER5L	3.03869	7.46564	5.76843e-50	4.37319e-47
ENSG00000123975	CKS2	CKS2	2.8976	7.0596	5.45039e-31	1.27141e-28
ENSG00000184588	PDE4B	PDE4B	2.83877	7.936	7.56985e-44	4.17374e-41
ENSG00000272196	HIST2H2AA4	HIST2H2AA4	2.67951	8.17804	4.3565e-42	2.20185e-39
ENSG00000203812	HIST2H2AA3	HIST2H2AA3	2.66971	8.1729	1.13422e-40	4.91358e-38
ENSG00000143153	ATP1B1	ATP1B1	2.66611	6.20444	1.66615e-24	2.5263e-22
ENSG00000139289	PHLDA1	PHLDA1	2.6632	7.02059	1.18816e-24	1.84775e-22
ENSG00000151327	FAM177A1	FAM177A1	2.6505	8.68298	2.67324e-29	5.79042e-27
ENSG00000281179	AC135068.8	AC135068.8	2.64859	6.82124	3.04165e-25	5.12434e-23
ENSG00000138166	DUSP5	DUSP5	2.62444	7.01143	2.58222e-18	2.33749e-16
ENSG00000086061	DNAJA1	DNAJA1	2.57706	9.71737	2.75909e-36	9.29661e-34
ENSG00000137267	TUBB2A	TUBB2A	2.56278	6.17941	4.55603e-31	1.10529e-28
ENSG00000059804	SLC2A3	SLC2A3	2.54558	7.8093	1.83626e-47	1.23743e-44
ENSG00000160789	LMNA	LMNA	2.52233	6.44663	6.80014e-22	7.93132e-20
ENSG00000136603	SKIL	SKIL	2.49421	6.8545	1.85029e-27	3.74067e-25
ENSG00000106211	HSPB1	HSPB1	2.46161	8.64512	7.32486e-23	9.45218e-21
ENSG00000075426	FOSL2	FOSL2	2.40514	7.8778	4.8933e-25	7.80996e-23
ENSG00000135916	ITM2C	ITM2C	2.40101	7.29117	1.87794e-21	2.1092e-19
ENSG00000163600	ICOS	ICOS	2.39934	6.29762	4.7804e-08	1.12376e-06
ENSG00000153234	NR4A2	NR4A2	2.36816	8.86836	1.55711e-14	8.90934e-13
ENSG00000144381	HSPD1	HSPD1	2.31693	9.50037	3.78079e-17	2.93981e-15
ENSG00000162924	REL	REL	2.30585	9.30392	2.59276e-20	2.71122e-18
ENSG00000173846	PLK3	PLK3	2.248	6.42763	7.33853e-15	4.49578e-13
ENSG00000164169	PRMT9	PRMT9	2.24731	7.16509	2.7311e-36	9.29661e-34
ENSG00000175197	DDIT3	DDIT3	2.24363	6.90071	6.79015e-32	1.87192e-29
ENSG00000186352	ANKRD37	ANKRD37	2.23284	6.34226	2.13436e-19	2.15748e-17
ENSG00000115541	HSPE1	HSPE1	2.17727	9.84399	5.11895e-15	3.168e-13
ENSG00000185304	RGPD2	RGPD2	2.15498	5.26638	3.42645e-23	4.61809e-21
ENSG00000134480	CCNH	CCNH	2.10601	7.72845	6.29772e-33	1.90978e-30
ENSG00000154640	BTG3	BTG3	2.09234	7.15104	5.07069e-27	9.92055e-25
ENSG00000144655	CSRNP1	CSRNP1	2.07878	7.30466	8.20362e-16	5.46757e-14
ENSG00000269821	KCNQ1OT1	KCNQ1OT1	2.07865	6.34926	1.76979e-31	4.4724e-29
ENSG00000143184	XCL1	XCL1	2.06317	9.15785	6.5075e-12	2.46675e-10
ENSG00000108106	UBE2S	UBE2S	2.03468	8.5938	3.83904e-25	6.29291e-23
ENSG00000136108	CKAP2	CKAP2	2.03219	5.77293	1.01612e-12	4.43364e-11
ENSG00000103257	SLC7A5	SLC7A5	2.02209	6.29134	6.54226e-18	5.6684e-16
ENSG00000183508	TENT5C	TENT5C	2.02187	7.80059	1.16979e-14	6.88811e-13
ENSG00000178381	ZFAND2A	ZFAND2A	2.01106	6.88126	1.26949e-16	9.38955e-15
ENSG00000134294	SLC38A2	SLC38A2	1.97303	7.50458	7.10515e-28	1.48596e-25
ENSG00000275993	SIK1B	SIK1B	1.9617	6.14871	1.25376e-15	8.2653e-14
ENSG00000276168	RN7SL1	RN7SL1	1.95318	5.18955	1.14362e-12	4.88456e-11
ENSG00000006652	IFRD1	IFRD1	1.94903	7.26338	1.57224e-19	1.61621e-17
ENSG00000187627	RGPD1	RGPD1	1.94083	4.99243	3.91834e-24	5.65827e-22
ENSG00000142178	SIK1	SIK1	1.92564	5.99859	2.13557e-15	1.36339e-13
ENSG00000143878	RHOB	RHOB	1.92323	6.55546	9.02548e-23	1.14041e-20
ENSG00000188389	PDCD1	PDCD1	1.91701	6.18899	2.21006e-18	2.03091e-16
ENSG00000116161	CACYBP	CACYBP	1.9115	8.57029	1.01949e-16	7.63356e-15
ENSG00000204386	NEU1	NEU1	1.90861	6.79572	5.48882e-14	2.94599e-12
ENSG00000178573	MAF	MAF	1.8981	7.51806	9.94185e-18	8.49258e-16
ENSG00000117036	ETV3	ETV3	1.88721	6.25755	2.80409e-22	3.33467e-20
ENSG00000172215	CXCR6	CXCR6	1.8782	7.33992	9.06279e-26	1.57045e-23
ENSG00000105835	NAMPT	NAMPT	1.87708	6.52396	1.61182e-16	1.16377e-14
ENSG00000176845	METRNL	METRNL	1.87698	8.96014	6.16167e-14	3.2216e-12
ENSG00000117632	STMN1	STMN1	1.84551	7.42242	4.18711e-13	1.96859e-11
ENSG00000164611	PTTG1	PTTG1	1.8405	6.70238	5.81749e-12	2.24733e-10
ENSG00000116717	GADD45A	GADD45A	1.82523	7.18498	7.63049e-27	1.44622e-24
ENSG00000131981	LGALS3	LGALS3	1.82402	8.0479	4.77421e-19	4.59613e-17
ENSG00000070495	JMJD6	JMJD6	1.81821	6.58394	5.82349e-14	3.07126e-12
ENSG00000235576	LINC01871	LINC01871	1.80581	9.29146	1.27506e-31	3.36227e-29
ENSG00000171522	PTGER4	PTGER4	1.79803	7.97807	3.38763e-30	7.60962e-28
ENSG00000184205	TSPYL2	TSPYL2	1.79715	7.40893	1.54258e-17	1.28161e-15
ENSG00000197019	SERTAD1	SERTAD1	1.7916	8.25611	2.64883e-24	3.91833e-22
ENSG00000115539	PDCL3	PDCL3	1.75184	7.45684	1.17787e-22	1.45791e-20
ENSG00000182481	KPNA2	KPNA2	1.74637	6.05727	5.90147e-12	2.26534e-10
ENSG00000023445	BIRC3	BIRC3	1.74025	7.06636	5.65895e-14	3.01066e-12
ENSG00000113448	PDE4D	PDE4D	1.73493	7.47315	3.45497e-11	1.1974e-09
ENSG00000164687	FABP5	FABP5	1.72226	7.07394	4.70673e-24	6.63868e-22
ENSG00000186834	HEXIM1	HEXIM1	1.70421	6.89764	1.78906e-14	1.01408e-12
ENSG00000159388	BTG2	BTG2	1.68252	9.64913	8.73642e-19	8.15175e-17
ENSG00000101665	SMAD7	SMAD7	1.67541	8.23355	1.08553e-12	4.70267e-11
ENSG00000078589	P2RY10	P2RY10	1.65194	6.88831	5.78997e-13	2.62061e-11
ENSG00000185022	MAFF	MAFF	1.65184	7.46605	5.69733e-06	8.34645e-05
ENSG00000165178	NCF1C	NCF1C	1.6516	6.1539	2.12357e-15	1.36339e-13
ENSG00000042493	CAPG	CAPG	1.64968	7.10308	1.00808e-14	5.99413e-13
ENSG00000034677	RNF19A	RNF19A	1.64443	8.30676	4.72389e-16	3.25573e-14
ENSG00000116044	NFE2L2	NFE2L2	1.64408	6.60918	2.28622e-14	1.26054e-12
ENSG00000139722	VPS37B	VPS37B	1.63878	6.56535	2.39268e-16	1.668e-14
ENSG00000109929	SC5D	SC5D	1.63513	6.28287	2.39197e-16	1.668e-14
ENSG00000196352	CD55	CD55	1.63277	7.5787	1.22309e-13	6.03091e-12
ENSG00000168209	DDIT4	DDIT4	1.62739	10.2799	6.01158e-21	6.39653e-19
ENSG00000169895	SYAP1	SYAP1	1.62728	8.2151	2.62217e-17	2.08842e-15
ENSG00000126860	EVI2A	EVI2A	1.62723	7.20853	2.42615e-21	2.67538e-19
ENSG00000285976	AL135905.2	AL135905.2	1.62712	6.02008	2.98962e-19	2.97247e-17
ENSG00000069849	ATP1B3	ATP1B3	1.61302	8.43357	1.04508e-08	2.72034e-07
ENSG00000081320	STK17B	STK17B	1.61126	9.47674	3.84926e-26	6.86641e-24
ENSG00000141543	EIF4A3	EIF4A3	1.60511	7.37853	2.99584e-08	7.15346e-07
ENSG00000117560	FASLG	FASLG	1.60346	5.69897	2.04261e-08	5.01556e-07
ENSG00000196428	TSC22D2	TSC22D2	1.59957	6.17988	1.65087e-15	1.07662e-13
ENSG00000135048	CEMIP2	CEMIP2	1.5937	9.38236	1.59417e-09	4.67085e-08
ENSG00000104660	LEPROTL1	LEPROTL1	1.58509	8.27006	4.72793e-23	6.23367e-21
ENSG00000157933	SKI	SKI	1.58402	6.03494	1.80932e-12	7.56796e-11
ENSG00000141682	PMAIP1	PMAIP1	1.5661	8.37433	1.69638e-09	4.92274e-08
ENSG00000112245	PTP4A1	PTP4A1	1.56067	5.90784	2.65141e-17	2.08842e-15
ENSG00000132510	KDM6B	KDM6B	1.55568	7.08834	4.16616e-06	6.30119e-05
ENSG00000161835	GRASP	GRASP	1.54774	6.32905	1.41584e-05	0.000183877
ENSG00000233093	LINC00892	LINC00892	1.53741	6.01472	6.02761e-07	1.09127e-05
ENSG00000110172	CHORDC1	CHORDC1	1.53556	7.48066	2.75243e-15	1.72098e-13
ENSG00000174373	RALGAPA1	RALGAPA1	1.53427	6.62504	1.37636e-17	1.15939e-15
ENSG00000188229	TUBB4B	TUBB4B	1.53225	9.01002	1.35837e-16	9.92589e-15
ENSG00000143384	MCL1	MCL1	1.52803	9.61678	1.14993e-21	1.31591e-19
ENSG00000119801	YPEL5	YPEL5	1.52063	9.02416	8.78596e-10	2.65109e-08
ENSG00000134107	BHLHE40	BHLHE40	1.51872	7.52609	2.56292e-07	5.0468e-06
ENSG00000163659	TIPARP	TIPARP	1.49433	7.62534	5.40005e-12	2.11299e-10
ENSG00000173559	NABP1	NABP1	1.49236	6.72953	1.20777e-14	7.04337e-13
ENSG00000188486	H2AFX	H2AFX	1.48486	7.55035	8.19494e-17	6.21279e-15
ENSG00000164105	SAP30	SAP30	1.46349	7.04507	1.13891e-12	4.88456e-11
ENSG00000186827	TNFRSF4	TNFRSF4	1.45893	6.10774	7.22641e-07	1.27779e-05
ENSG00000236552	RPL13AP5	RPL13AP5	1.45773	6.00779	0.000348405	0.00288672
ENSG00000150907	FOXO1	FOXO1	1.44823	5.589	2.20238e-16	1.57146e-14
ENSG00000169508	GPR183	GPR183	1.44625	7.18012	1.47604e-09	4.38833e-08
ENSG00000111266	DUSP16	DUSP16	1.43722	5.61454	2.20099e-17	1.80392e-15
ENSG00000282988	AL031777.3	AL031777.3	1.43266	5.20772	1.93046e-14	1.0841e-12
ENSG00000185650	ZFP36L1	ZFP36L1	1.43035	8.19472	2.23975e-17	1.81121e-15
ENSG00000116752	BCAS2	BCAS2	1.42766	8.24528	8.78522e-15	5.32823e-13
ENSG00000189159	JPT1	JPT1	1.42419	8.56753	6.26534e-08	1.45711e-06
ENSG00000153201	RANBP2	RANBP2	1.41872	7.28042	3.43368e-12	1.40711e-10
ENSG00000117602	RCAN3	RCAN3	1.41856	6.9668	7.94393e-14	4.015e-12
ENSG00000137575	SDCBP	SDCBP	1.41785	7.86576	4.85769e-13	2.249e-11
ENSG00000055483	AC022966.1	AC022966.1	1.41345	6.40203	8.89997e-13	3.969e-11
ENSG00000127824	TUBA4A	TUBA4A	1.40329	9.7683	4.64459e-09	1.28628e-07
ENSG00000179119	SPTY2D1	SPTY2D1	1.40304	6.80672	4.87307e-11	1.62391e-09
ENSG00000163874	ZC3H12A	ZC3H12A	1.40009	6.31622	1.24874e-11	4.61805e-10
ENSG00000139112	GABARAPL1	GABARAPL1	1.39986	8.24842	6.52656e-14	3.38321e-12
ENSG00000184557	SOCS3	SOCS3	1.39465	6.85897	3.02326e-13	1.43251e-11
ENSG00000111859	NEDD9	NEDD9	1.39243	6.12104	4.93413e-09	1.34799e-07
ENSG00000065911	MTHFD2	MTHFD2	1.38843	5.66557	2.78581e-13	1.34095e-11
ENSG00000186480	INSIG1	INSIG1	1.3861	5.85589	6.74459e-14	3.44997e-12
ENSG00000116661	FBXO2	FBXO2	1.38497	5.56673	8.60499e-08	1.91169e-06
ENSG00000168214	RBPJ	RBPJ	1.38256	7.45202	4.4381e-17	3.40723e-15
ENSG00000197989	SNHG12	SNHG12	1.37768	7.59166	5.81603e-18	5.1122e-16
ENSG00000154124	OTULIN	OTULIN	1.36813	7.09336	5.93974e-12	2.26569e-10
ENSG00000111276	CDKN1B	CDKN1B	1.36146	7.92642	3.33365e-19	3.26106e-17
ENSG00000143185	XCL2	XCL2	1.34839	9.59998	3.39117e-11	1.18204e-09
ENSG00000113811	SELENOK	SELENOK	1.33906	9.48594	2.41129e-08	5.87329e-07
ENSG00000147889	CDKN2A	CDKN2A	1.33621	5.70152	3.47061e-12	1.4127e-10
ENSG00000231721	LINC-PINT	LINC-PINT	1.33511	6.96269	1.69888e-12	7.15536e-11
ENSG00000282885	AL627171.2	AL627171.2	1.33205	4.7398	6.06946e-08	1.42128e-06
ENSG00000131759	RARA	RARA	1.33011	5.49208	2.1081e-12	8.75728e-11
ENSG00000138767	CNOT6L	CNOT6L	1.32502	9.04424	1.53398e-11	5.57102e-10
ENSG00000147872	PLIN2	PLIN2	1.3235	7.44939	4.9838e-09	1.35546e-07
ENSG00000168421	RHOH	RHOH	1.31936	8.38959	4.46102e-14	2.41572e-12
ENSG00000134352	IL6ST	IL6ST	1.31744	5.94573	1.6775e-09	4.89137e-08
ENSG00000158517	NCF1	NCF1	1.31717	5.95574	5.60703e-12	2.17991e-10
ENSG00000134333	LDHA	LDHA	1.30635	9.88122	1.92919e-13	9.43592e-12
ENSG00000177426	TGIF1	TGIF1	1.30605	6.56665	6.99596e-07	1.24264e-05
ENSG00000123505	AMD1	AMD1	1.28986	7.86818	3.81003e-11	1.30553e-09
ENSG00000108256	NUFIP2	NUFIP2	1.28566	7.50398	1.38098e-14	7.97682e-13
ENSG00000065989	PDE4A	PDE4A	1.28546	5.64733	8.12278e-10	2.46323e-08
ENSG00000102007	PLP2	PLP2	1.2842	8.22732	5.57843e-11	1.84881e-09
ENSG00000059728	MXD1	MXD1	1.27824	5.69895	4.13178e-12	1.65955e-10
ENSG00000092820	EZR	EZR	1.27444	8.853	1.33002e-11	4.85937e-10
ENSG00000141232	TOB1	TOB1	1.26958	8.83366	3.37101e-06	5.2196e-05
ENSG00000187837	HIST1H1C	HIST1H1C	1.26788	6.97058	2.587e-07	5.07772e-06
ENSG00000107372	ZFAND5	ZFAND5	1.26577	7.5934	1.14096e-13	5.67209e-12
ENSG00000001630	CYP51A1	CYP51A1	1.26387	5.04691	4.65055e-11	1.55832e-09
ENSG00000157601	MX1	MX1	1.25485	6.02757	3.09184e-06	4.82057e-05
ENSG00000112378	PERP	PERP	1.24584	6.13098	1.68274e-07	3.48321e-06
ENSG00000103342	GSPT1	GSPT1	1.24545	7.85468	3.48165e-11	1.19978e-09
ENSG00000155090	KLF10	KLF10	1.24497	5.64483	3.97327e-09	1.11564e-07
ENSG00000143924	EML4	EML4	1.23961	8.35036	4.90829e-18	4.37776e-16
ENSG00000232956	SNHG15	SNHG15	1.23778	7.54657	9.81941e-12	3.67622e-10
ENSG00000176083	ZNF683	ZNF683	1.23757	6.33798	7.15275e-05	0.000758417
ENSG00000135604	STX11	STX11	1.23606	5.66776	8.31897e-07	1.44984e-05
ENSG00000140332	TLE3	TLE3	1.23485	5.95746	8.77111e-08	1.94149e-06
ENSG00000144802	NFKBIZ	NFKBIZ	1.22615	7.47335	7.65888e-06	0.00010904
ENSG00000051108	HERPUD1	HERPUD1	1.22321	9.42051	4.06849e-11	1.37851e-09
ENSG00000183828	NUDT14	NUDT14	1.21892	4.87962	1.53468e-09	4.5404e-08
ENSG00000167460	TPM4	TPM4	1.2091	8.0485	4.70295e-13	2.19411e-11
ENSG00000135541	AHI1	AHI1	1.20901	6.15455	6.81315e-07	1.21535e-05
ENSG00000164674	SYTL3	SYTL3	1.20828	8.54411	3.01059e-13	1.43251e-11
ENSG00000164032	H2AFZ	H2AFZ	1.20612	9.59671	5.19797e-09	1.4074e-07
ENSG00000067955	CBFB	CBFB	1.19663	6.60472	1.23473e-09	3.70725e-08
ENSG00000197451	HNRNPAB	HNRNPAB	1.19586	7.9849	9.98777e-15	5.99413e-13
ENSG00000109320	NFKB1	NFKB1	1.19346	7.03335	8.53204e-08	1.90246e-06
ENSG00000088986	DYNLL1	DYNLL1	1.19285	9.14373	8.47784e-07	1.4733e-05
ENSG00000271869	AC026979.2	AC026979.2	1.1925	7.26415	1.04252e-08	2.72034e-07
ENSG00000109943	CRTAM	CRTAM	1.19033	6.99342	5.96595e-05	0.000646134
ENSG00000153283	CD96	CD96	1.18938	7.44048	3.36121e-14	1.83655e-12
ENSG00000255112	CHMP1B	CHMP1B	1.18793	6.81675	2.95326e-07	5.72253e-06
ENSG00000274012	RN7SL2	RN7SL2	1.18622	4.18551	3.98958e-07	7.46814e-06
ENSG00000023902	PLEKHO1	PLEKHO1	1.18575	6.9165	2.86693e-11	1.01093e-09
ENSG00000113580	NR3C1	NR3C1	1.17181	7.27756	2.4419e-12	1.00749e-10
ENSG00000222041	CYTOR	CYTOR	1.16941	6.89309	0.000102019	0.00102782
ENSG00000100298	APOBEC3H	APOBEC3H	1.16871	5.59692	8.6447e-06	0.00012054
ENSG00000168906	MAT2A	MAT2A	1.16687	7.12078	2.83585e-09	7.99973e-08
ENSG00000085117	CD82	CD82	1.16235	5.60359	6.32053e-08	1.45711e-06
ENSG00000100376	FAM118A	FAM118A	1.1568	5.67529	2.13558e-07	4.34641e-06
ENSG00000027697	IFNGR1	IFNGR1	1.14727	7.67847	2.60799e-08	6.27678e-07
ENSG00000086619	ERO1B	ERO1B	1.14156	6.62088	2.40156e-09	6.90306e-08
ENSG00000180008	SOCS4	SOCS4	1.14035	5.57794	1.10277e-08	2.84609e-07
ENSG00000106829	TLE4	TLE4	1.13961	7.86462	2.53056e-13	1.22783e-11
ENSG00000171791	BCL2	BCL2	1.13077	8.22805	6.34257e-08	1.45711e-06
ENSG00000273319	AC058791.1	AC058791.1	1.12397	8.79871	1.26807e-11	4.6611e-10
ENSG00000181788	SIAH2	SIAH2	1.12245	7.23925	2.60637e-11	9.24423e-10
ENSG00000120705	ETF1	ETF1	1.12083	6.52908	6.43337e-08	1.47239e-06
ENSG00000214756	CSKMT	CSKMT	1.1149	6.1176	4.14891e-07	7.71875e-06
ENSG00000089737	DDX24	DDX24	1.11425	8.9243	1.09963e-11	4.09156e-10
ENSG00000128016	ZFP36	ZFP36	1.11158	10.4292	0.00219944	0.0134066
ENSG00000153922	CHD1	CHD1	1.11093	8.08619	2.56657e-11	9.1566e-10
ENSG00000116679	IVNS1ABP	IVNS1ABP	1.10841	6.88153	3.34327e-10	1.05609e-08
ENSG00000164104	HMGB2	HMGB2	1.10324	9.40856	1.02169e-06	1.7554e-05
ENSG00000118971	CCND2	CCND2	1.10232	7.3415	6.18782e-13	2.77994e-11
ENSG00000154814	OXNAD1	OXNAD1	1.10176	8.2069	6.95933e-12	2.62164e-10
ENSG00000179094	AC129492.1	AC129492.1	1.10057	6.67654	7.40838e-05	0.000781423
ENSG00000168374	ARF4	ARF4	1.09003	7.12978	5.19788e-10	1.60026e-08
ENSG00000163950	SLBP	SLBP	1.08975	7.47041	2.60058e-07	5.08791e-06
ENSG00000164430	CGAS	CGAS	1.0867	5.4976	3.70418e-06	5.6589e-05
ENSG00000125735	TNFSF14	TNFSF14	1.0862	6.55356	1.32478e-07	2.84921e-06
ENSG00000260708	AL118516.1	AL118516.1	1.08422	7.07742	1.15208e-05	0.000153569
ENSG00000285772	AC000120.2	AC000120.2	1.08384	4.80788	4.55327e-09	1.26677e-07
ENSG00000006634	DBF4	DBF4	1.079	6.50888	4.67495e-09	1.2888e-07
ENSG00000182487	NCF1B	NCF1B	1.07785	5.50746	2.25629e-07	4.56146e-06
ENSG00000117000	RLF	RLF	1.07355	6.06319	7.75244e-08	1.74553e-06
ENSG00000095380	NANS	NANS	1.07251	6.0458	1.26442e-05	0.000167074
ENSG00000186810	CXCR3	CXCR3	1.06987	6.03961	1.25477e-07	2.70826e-06
ENSG00000161547	SRSF2	SRSF2	1.06932	9.00815	4.02774e-06	6.10707e-05
ENSG00000101901	ALG13	ALG13	1.06783	6.23359	1.51008e-10	4.87163e-09
ENSG00000186469	GNG2	GNG2	1.06643	5.72389	3.37359e-06	5.2196e-05
ENSG00000062716	VMP1	VMP1	1.06523	7.65535	5.03248e-10	1.55725e-08
ENSG00000013441	CLK1	CLK1	1.06286	7.87733	1.70502e-07	3.51732e-06
ENSG00000152409	JMY	JMY	1.062	6.7104	5.47798e-07	1.00679e-05
ENSG00000138757	G3BP2	G3BP2	1.06184	8.40362	9.7057e-13	4.29672e-11
ENSG00000173598	NUDT4	NUDT4	1.06175	6.82459	4.45691e-10	1.39336e-08
ENSG00000100644	HIF1A	HIF1A	1.06039	6.08328	4.0968e-07	7.64526e-06
ENSG00000117090	SLAMF1	SLAMF1	1.05906	5.49714	8.96833e-05	0.000921914
ENSG00000156675	RAB11FIP1	RAB11FIP1	1.05682	7.17019	9.57943e-09	2.52605e-07
ENSG00000120690	ELF1	ELF1	1.05676	9.07211	3.17211e-11	1.11207e-09
ENSG00000166128	RAB8B	RAB8B	1.05667	7.54748	3.4363e-06	5.28964e-05
ENSG00000180747	SMG1P3	SMG1P3	1.0535	5.22107	0.000172023	0.00161505
ENSG00000062194	GPBP1	GPBP1	1.0531	9.0002	1.25625e-10	4.09632e-09
ENSG00000213639	PPP1CB	PPP1CB	1.05307	7.72227	5.08285e-12	2.00179e-10
ENSG00000183918	SH2D1A	SH2D1A	1.05029	6.01839	3.48179e-05	0.00040688
ENSG00000103121	CMC2	CMC2	1.0492	6.3385	1.74245e-08	4.34897e-07
ENSG00000102245	CD40LG	CD40LG	1.04685	6.54857	0.000254818	0.00224141
ENSG00000090013	BLVRB	BLVRB	1.04474	6.01244	6.73608e-09	1.80771e-07
ENSG00000140941	MAP1LC3B	MAP1LC3B	1.04443	8.92123	4.81073e-12	1.907e-10
ENSG00000143933	CALM2	CALM2	1.04375	8.65498	1.40318e-06	2.34444e-05
ENSG00000077721	UBE2A	UBE2A	1.04119	6.47656	1.11954e-05	0.00015066
ENSG00000272211	AC114760.2	AC114760.2	1.03727	7.41316	5.7925e-09	1.5614e-07
ENSG00000100221	JOSD1	JOSD1	1.03579	6.9471	1.22626e-08	3.12491e-07
ENSG00000100425	BRD1	BRD1	1.03388	7.66554	1.89588e-08	4.69328e-07
ENSG00000205268	PDE7A	PDE7A	1.0338	6.86107	1.02499e-10	3.36031e-09
ENSG00000246705	H2AFJ	H2AFJ	1.02829	7.72458	6.63614e-10	2.03274e-08
ENSG00000112096	SOD2	SOD2	1.01847	6.54541	2.92508e-06	4.57233e-05
ENSG00000107968	MAP3K8	MAP3K8	1.01779	7.38109	0.000164056	0.00156693
ENSG00000105993	DNAJB6	DNAJB6	1.01412	7.84388	2.01833e-05	0.000249819
ENSG00000169499	PLEKHA2	PLEKHA2	1.0081	6.53646	2.02009e-07	4.15317e-06
ENSG00000104671	DCTN6	DCTN6	1.00793	6.34794	7.1857e-08	1.63226e-06
ENSG00000102393	GLA	GLA	1.00757	5.40719	0.00567075	0.0289017
ENSG00000265118	AC134669.1	AC134669.1	1.00438	5.52543	1.12322e-05	0.000150716
ENSG00000157303	SUSD3	SUSD3	1.00043	5.80515	2.90608e-05	0.000346281
ENSG00000278743	AC087239.1	AC087239.1	1.0001	5.97981	8.69664e-05	0.000895503
ENSG00000114737	CISH	CISH	0.995655	5.59487	0.000208115	0.00190093
ENSG00000164548	TRA2A	TRA2A	0.994717	8.26524	2.48879e-11	8.93165e-10
ENSG00000011198	ABHD5	ABHD5	0.99463	5.25399	0.000111536	0.00110896
ENSG00000185507	IRF7	IRF7	0.993742	6.02466	2.12315e-06	3.3991e-05
ENSG00000198380	GFPT1	GFPT1	0.993198	5.70505	8.85512e-08	1.94588e-06
ENSG00000179820	MYADM	MYADM	0.992999	7.54119	0.00189456	0.0118748
ENSG00000115816	CEBPZ	CEBPZ	0.991593	7.83201	1.22455e-08	3.12491e-07
ENSG00000187840	EIF4EBP1	EIF4EBP1	0.990979	5.58829	9.77159e-07	1.68845e-05
ENSG00000164442	CITED2	CITED2	0.990034	8.40391	1.63998e-06	2.69323e-05
ENSG00000116560	SFPQ	SFPQ	0.988214	9.0008	4.05778e-09	1.13412e-07
ENSG00000153094	BCL2L11	BCL2L11	0.988164	6.24631	0.000137865	0.00133785
ENSG00000133106	EPSTI1	EPSTI1	0.986622	6.30969	1.98457e-05	0.000247154
ENSG00000126804	ZBTB1	ZBTB1	0.986475	7.48173	2.49656e-06	3.94313e-05
ENSG00000158321	AUTS2	AUTS2	0.984192	6.247	6.08797e-07	1.09892e-05
ENSG00000165175	MID1IP1	MID1IP1	0.984138	5.57044	1.04953e-06	1.79308e-05
ENSG00000280138	AC027290.2	AC027290.2	0.98305	6.78658	8.61099e-06	0.00012054
ENSG00000146376	ARHGAP18	ARHGAP18	0.98155	6.32777	1.5639e-08	3.9357e-07
ENSG00000204256	BRD2	BRD2	0.980672	8.20568	1.42075e-07	3.02346e-06
ENSG00000109971	HSPA8	HSPA8	0.980133	10.6588	1.07711e-08	2.79175e-07
ENSG00000245904	AC025164.1	AC025164.1	0.979752	6.4977	1.29455e-08	3.28512e-07
ENSG00000135272	MDFIC	MDFIC	0.978423	7.85529	2.47142e-09	7.03716e-08
ENSG00000115875	SRSF7	SRSF7	0.97828	10.3536	1.98766e-06	3.2233e-05
ENSG00000184203	PPP1R2	PPP1R2	0.972734	8.6814	1.13899e-07	2.48488e-06
ENSG00000187193	MT1X	MT1X	0.970418	7.2361	4.31737e-05	0.000489436
ENSG00000118503	TNFAIP3	TNFAIP3	0.968974	10.0628	0.00294604	0.0170494
ENSG00000181222	POLR2A	POLR2A	0.96558	7.04145	2.32262e-07	4.67995e-06
ENSG00000121579	NAA50	NAA50	0.962554	6.8743	7.31721e-06	0.000105163
ENSG00000006576	PHTF2	PHTF2	0.962233	6.01216	7.83909e-05	0.000818314
ENSG00000166233	ARIH1	ARIH1	0.961199	6.79485	7.7707e-08	1.74553e-06
ENSG00000171943	SRGAP2C	SRGAP2C	0.958862	5.9896	4.31782e-06	6.46606e-05
ENSG00000241370	RPP21	RPP21	0.958571	6.31754	1.37369e-07	2.93359e-06
ENSG00000131979	GCH1	GCH1	0.95778	5.9572	2.53703e-07	5.04494e-06
ENSG00000158050	DUSP2	DUSP2	0.954821	10.9461	0.000625677	0.00474342
ENSG00000197635	DPP4	DPP4	0.952035	6.04625	0.00142392	0.00935651
ENSG00000143970	ASXL2	ASXL2	0.950476	6.22038	3.10538e-07	5.9791e-06
ENSG00000008083	JARID2	JARID2	0.944075	6.83046	1.02126e-08	2.68136e-07
ENSG00000159335	PTMS	PTMS	0.940849	7.49386	1.14632e-07	2.49192e-06
ENSG00000204569	PPP1R10	PPP1R10	0.93683	8.33552	7.81716e-09	2.07943e-07
ENSG00000181218	HIST3H2A	HIST3H2A	0.933776	6.64758	7.81496e-07	1.37385e-05
ENSG00000163602	RYBP	RYBP	0.932406	5.79871	6.95013e-08	1.58468e-06
ENSG00000145675	PIK3R1	PIK3R1	0.931449	9.81481	3.29161e-05	0.000386891
ENSG00000004478	FKBP4	FKBP4	0.931045	5.62409	0.00428679	0.0229474
ENSG00000115904	SOS1	SOS1	0.928998	6.4853	2.55544e-07	5.0468e-06
ENSG00000170340	B3GNT2	B3GNT2	0.925771	6.35768	5.94968e-06	8.67424e-05
ENSG00000063322	MED29	MED29	0.919521	6.19941	6.4351e-07	1.15813e-05
ENSG00000105717	PBX4	PBX4	0.916715	5.56829	2.39247e-06	3.79851e-05
ENSG00000132819	RBM38	RBM38	0.916286	8.03974	1.3986e-05	0.000182028
ENSG00000185262	UBALD2	UBALD2	0.915317	8.55131	3.9145e-10	1.23013e-08
ENSG00000067064	IDI1	IDI1	0.913368	8.18582	1.49377e-06	2.47534e-05
ENSG00000065154	OAT	OAT	0.911248	5.964	4.30941e-05	0.000489436
ENSG00000008294	SPAG9	SPAG9	0.911235	6.86113	1.55538e-07	3.24171e-06
ENSG00000228253	MT-ATP8	MT-ATP8	0.907449	8.08125	5.41876e-07	9.98929e-06
ENSG00000177917	ARL6IP6	ARL6IP6	0.898267	6.15838	7.4686e-06	0.000106833
ENSG00000156802	ATAD2	ATAD2	0.892764	5.74058	7.46848e-05	0.000786395
ENSG00000155926	SLA	SLA	0.891494	8.479	1.58325e-06	2.61647e-05
ENSG00000112297	CRYBG1	CRYBG1	0.890232	8.19699	1.16574e-08	2.99585e-07
ENSG00000103365	GGA2	GGA2	0.884078	5.57412	3.2037e-07	6.14887e-06
ENSG00000025708	TYMP	TYMP	0.883743	6.71257	8.82818e-08	1.94588e-06
ENSG00000136527	TRA2B	TRA2B	0.8825	8.66401	3.42055e-08	8.13554e-07
ENSG00000119950	MXI1	MXI1	0.877731	6.27629	1.61029e-07	3.34466e-06
ENSG00000134758	RNF138	RNF138	0.87723	6.04478	4.98425e-05	0.000553653
ENSG00000185728	YTHDF3	YTHDF3	0.876494	5.40803	4.45265e-06	6.61895e-05
ENSG00000267520	AC010733.2	AC010733.2	0.870188	5.13366	6.19453e-06	9.00291e-05
ENSG00000165030	NFIL3	NFIL3	0.868639	6.23433	2.06883e-06	3.32823e-05
ENSG00000110448	CD5	CD5	0.866922	6.45199	0.000776776	0.0057664
ENSG00000117143	UAP1	UAP1	0.865112	6.11787	4.22826e-06	6.36037e-05
ENSG00000260549	MT1L	MT1L	0.865078	6.13756	1.81376e-05	0.000228225
ENSG00000137947	GTF2B	GTF2B	0.862155	7.14425	1.04173e-06	1.78477e-05
ENSG00000015568	RGPD5	RGPD5	0.860235	5.25202	6.93373e-06	0.000100365
ENSG00000133872	SARAF	SARAF	0.858979	10.6938	2.03928e-07	4.16438e-06
ENSG00000176105	YES1	YES1	0.855684	5.51106	0.000171605	0.00161505
ENSG00000167553	TUBA1C	TUBA1C	0.854018	6.37416	3.42984e-07	6.50062e-06
ENSG00000044574	HSPA5	HSPA5	0.852617	9.53589	7.72437e-08	1.74553e-06
ENSG00000135070	ISCA1	ISCA1	0.850714	7.61311	2.8634e-06	4.48747e-05
ENSG00000169288	MRPL1	MRPL1	0.846684	6.78918	2.30492e-06	3.66912e-05
ENSG00000239569	KMT2E-AS1	KMT2E-AS1	0.845381	5.79814	0.000255	0.00224141
ENSG00000167106	FAM102A	FAM102A	0.845039	6.35347	2.36284e-07	4.74523e-06
ENSG00000164305	CASP3	CASP3	0.844109	6.00923	0.000182379	0.00169652
ENSG00000170542	SERPINB9	SERPINB9	0.842616	7.41148	1.97473e-05	0.000246435
ENSG00000159733	ZFYVE28	ZFYVE28	0.840877	5.5037	2.80828e-05	0.000336605
ENSG00000124788	ATXN1	ATXN1	0.84021	6.76157	3.99315e-05	0.000456952
ENSG00000185115	NSMCE3	NSMCE3	0.839876	7.37712	3.03007e-07	5.85266e-06
ENSG00000168264	IRF2BP2	IRF2BP2	0.839368	7.29528	8.29657e-05	0.000860149
ENSG00000167470	MIDN	MIDN	0.838899	7.71789	7.03402e-05	0.000748445
ENSG00000273702	AC091271.1	AC091271.1	0.8385	5.83969	2.16052e-05	0.000265792
ENSG00000198604	BAZ1A	BAZ1A	0.837277	8.07277	1.28106e-06	2.16425e-05
ENSG00000135821	GLUL	GLUL	0.83624	7.60508	4.55826e-06	6.75937e-05
ENSG00000055044	NOP58	NOP58	0.836089	7.46726	3.76156e-07	7.08504e-06
ENSG00000132646	PCNA	PCNA	0.835904	6.27809	5.08621e-05	0.000562917
ENSG00000173917	HOXB2	HOXB2	0.83415	5.20626	0.000127438	0.00124063
ENSG00000100591	AHSA1	AHSA1	0.832219	7.50756	5.9356e-05	0.000643997
ENSG00000143622	RIT1	RIT1	0.831002	5.83294	2.12409e-06	3.3991e-05
ENSG00000101596	SMCHD1	SMCHD1	0.828842	9.01524	1.86469e-06	3.04014e-05
ENSG00000148154	UGCG	UGCG	0.826103	5.81222	1.708e-05	0.000215812
ENSG00000169967	MAP3K2	MAP3K2	0.821856	7.33092	3.30701e-05	0.00038795
ENSG00000111011	RSRC2	RSRC2	0.820477	8.35796	1.43466e-07	3.03178e-06
ENSG00000146278	PNRC1	PNRC1	0.815212	10.5621	6.34016e-08	1.45711e-06
ENSG00000125995	ROMO1	ROMO1	0.813792	8.20697	1.18982e-07	2.57723e-06
ENSG00000138468	SENP7	SENP7	0.813186	6.51718	7.29407e-05	0.000770706
ENSG00000183648	NDUFB1	NDUFB1	0.81007	8.56412	1.61327e-06	2.65883e-05
ENSG00000139687	RB1	RB1	0.809909	5.43301	1.34266e-05	0.00017596
ENSG00000155304	HSPA13	HSPA13	0.80829	5.38764	6.21971e-05	0.00067122
ENSG00000101695	RNF125	RNF125	0.806795	6.60988	0.00026507	0.00230653
ENSG00000108854	SMURF2	SMURF2	0.806204	6.20008	5.10264e-05	0.000563707
ENSG00000237296	SMG1P1	SMG1P1	0.806165	5.00848	0.000125678	0.00122743
ENSG00000115419	GLS	GLS	0.805507	8.05155	2.55319e-07	5.0468e-06
ENSG00000163162	RNF149	RNF149	0.801591	6.60222	1.08454e-05	0.000146824
ENSG00000155903	RASA2	RASA2	0.801182	7.69392	7.89166e-07	1.38332e-05
ENSG00000172216	CEBPB	CEBPB	0.799997	8.89799	8.09359e-06	0.000114157
ENSG00000183864	TOB2	TOB2	0.798157	5.89841	0.000186266	0.0017226
ENSG00000108953	YWHAE	YWHAE	0.794147	7.17398	8.76186e-06	0.000121882
ENSG00000132661	NXT1	NXT1	0.790965	7.14334	2.48983e-05	0.000300215
ENSG00000169641	LUZP1	LUZP1	0.790735	6.64844	0.000124467	0.00122317
ENSG00000111843	TMEM14C	TMEM14C	0.790612	7.18615	1.12032e-05	0.00015066
ENSG00000146457	WTAP	WTAP	0.789872	7.58118	3.26971e-07	6.23611e-06
ENSG00000127311	HELB	HELB	0.78945	5.89729	1.39691e-05	0.000182028
ENSG00000248124	RRN3P1	RRN3P1	0.788378	5.42172	2.90614e-05	0.000346281
ENSG00000248167	TRIM39-RPP21	TRIM39-RPP21	0.787845	5.98827	5.33605e-06	7.83612e-05
ENSG00000100664	EIF5	EIF5	0.782365	8.55593	3.7904e-05	0.000436219
ENSG00000102606	ARHGEF7	ARHGEF7	0.781065	5.29936	4.73103e-05	0.000527458
ENSG00000170540	ARL6IP1	ARL6IP1	0.780758	8.01644	2.42746e-05	0.000294451
ENSG00000008517	IL32	IL32	0.780711	11.4402	4.73728e-07	8.78641e-06
ENSG00000168298	HIST1H1E	HIST1H1E	0.779616	6.11973	0.000284352	0.00245669
ENSG00000131389	SLC6A6	SLC6A6	0.778433	5.27419	0.000357169	0.00295127
ENSG00000288632	NA	NA	0.774998	4.06256	0.000229161	0.00205297
ENSG00000133302	SLF1	SLF1	0.77492	6.19542	0.000373176	0.0030544
ENSG00000198355	PIM3	PIM3	0.774852	7.16646	0.000597301	0.00456613
ENSG00000142168	SOD1	SOD1	0.774511	9.68948	0.000141504	0.00137096
ENSG00000198586	TLK1	TLK1	0.774374	7.33313	1.01268e-05	0.000139272
ENSG00000137880	GCHFR	GCHFR	0.772967	7.45074	7.54522e-05	0.000793098
ENSG00000110852	CLEC2B	CLEC2B	0.772596	9.33946	3.59981e-06	5.51334e-05
ENSG00000089692	LAG3	LAG3	0.771777	7.32641	0.000159506	0.0015284
ENSG00000113810	SMC4	SMC4	0.770972	6.30924	0.00469073	0.0247816
ENSG00000177144	NUDT4B	NUDT4B	0.770298	4.48475	0.00010919	0.00109047
ENSG00000132780	NASP	NASP	0.769755	8.0425	3.36387e-05	0.000393859
ENSG00000152484	USP12	USP12	0.769535	5.97848	0.000224315	0.00201851
ENSG00000125772	GPCPD1	GPCPD1	0.769241	6.50971	2.33731e-05	0.000285227
ENSG00000152495	CAMK4	CAMK4	0.76718	5.75875	0.000813306	0.00597946
ENSG00000172115	CYCS	CYCS	0.765845	9.22677	0.000115311	0.00114275
ENSG00000134744	TUT4	TUT4	0.765718	7.03148	4.39794e-05	0.000496714
ENSG00000110848	CD69	CD69	0.765353	10.7433	0.00516052	0.0269351
ENSG00000105939	ZC3HAV1	ZC3HAV1	0.762585	8.32238	9.14577e-07	1.58483e-05
ENSG00000123908	AGO2	AGO2	0.762121	6.73442	1.04071e-05	0.00014248
ENSG00000226067	LINC00623	LINC00623	0.762028	6.15835	0.000107021	0.00107286
ENSG00000108588	CCDC47	CCDC47	0.761019	6.30596	3.92028e-05	0.000449461
ENSG00000129657	SEC14L1	SEC14L1	0.760853	6.57911	8.64551e-06	0.00012054
ENSG00000143889	HNRNPLL	HNRNPLL	0.759603	5.70895	0.00030695	0.00260007
ENSG00000185088	RPS27L	RPS27L	0.758781	8.82261	6.76718e-07	1.21071e-05
ENSG00000110958	PTGES3	PTGES3	0.75538	9.42563	1.45536e-06	2.41829e-05
ENSG00000229833	PET100	PET100	0.751918	8.5394	6.54685e-07	1.17475e-05
ENSG00000114166	KAT2B	KAT2B	0.751432	5.86304	3.06784e-05	0.000361993
ENSG00000151729	SLC25A4	SLC25A4	0.750315	5.79178	3.61821e-05	0.00041799
ENSG00000161011	SQSTM1	SQSTM1	0.750098	7.79046	0.0010242	0.00715639
ENSG00000129083	COPB1	COPB1	0.747447	7.06646	2.96532e-05	0.000351263
ENSG00000070761	CFAP20	CFAP20	0.746996	5.85287	1.34327e-05	0.00017596
ENSG00000121741	ZMYM2	ZMYM2	0.744414	6.32141	0.00023779	0.00210848
ENSG00000127152	BCL11B	BCL11B	0.743478	8.94858	2.20375e-05	0.000270562
ENSG00000170906	NDUFA3	NDUFA3	0.742718	8.88901	1.81969e-05	0.000228497
ENSG00000172965	MIR4435-2HG	MIR4435-2HG	0.742522	5.81956	0.000472615	0.00370816
ENSG00000167202	TBC1D2B	TBC1D2B	0.742432	5.91055	0.000150994	0.00145593
ENSG00000109519	GRPEL1	GRPEL1	0.74193	6.6834	6.68128e-05	0.00071533
ENSG00000181555	SETD2	SETD2	0.741841	7.12281	8.13063e-06	0.000114414
ENSG00000185710	SMG1P4	SMG1P4	0.741579	4.2479	0.000174543	0.00163113
ENSG00000198846	TOX	TOX	0.739843	5.74601	0.000254746	0.00224141
ENSG00000162545	CAMK2N1	CAMK2N1	0.738646	6.03017	3.63239e-05	0.00041883
ENSG00000182117	NOP10	NOP10	0.73798	8.21762	0.000117922	0.00116671
ENSG00000067334	DNTTIP2	DNTTIP2	0.737945	7.74364	6.68742e-05	0.00071533
ENSG00000140379	BCL2A1	BCL2A1	0.735685	6.13574	0.00208629	0.012846
ENSG00000141556	TBCD	TBCD	0.734943	5.79309	0.000821379	0.00602378
ENSG00000006712	PAF1	PAF1	0.734724	5.54744	0.000388244	0.00316067
ENSG00000257379	AC023509.1	AC023509.1	0.732485	5.13272	0.00657935	0.0323631
ENSG00000119048	UBE2B	UBE2B	0.73214	8.61968	3.58589e-05	0.00041606
ENSG00000076641	PAG1	PAG1	0.728568	6.37746	0.00048049	0.00376022
ENSG00000178878	APOLD1	APOLD1	0.726552	5.51924	0.000502958	0.00390581
ENSG00000115165	CYTIP	CYTIP	0.725428	9.75362	4.18127e-06	6.30831e-05
ENSG00000237499	AL357060.1	AL357060.1	0.725204	5.37211	0.000278286	0.00241305
ENSG00000152518	ZFP36L2	ZFP36L2	0.725005	11.8805	0.000306457	0.00260007
ENSG00000198805	PNP	PNP	0.724189	6.37012	1.78481e-05	0.00022505
ENSG00000143319	ISG20L2	ISG20L2	0.723085	6.58845	0.00574776	0.0291961
ENSG00000155096	AZIN1	AZIN1	0.72172	6.13183	0.000228847	0.00205297
ENSG00000153147	SMARCA5	SMARCA5	0.721411	8.00403	5.73447e-06	8.38061e-05
ENSG00000122644	ARL4A	ARL4A	0.720109	7.64576	0.000844311	0.00613999
ENSG00000123562	MORF4L2	MORF4L2	0.719852	6.52037	0.000398659	0.00321953
ENSG00000187189	TSPYL4	TSPYL4	0.719793	5.83153	0.00019269	0.00177608
ENSG00000287697	Z99127.4	Z99127.4	0.718985	6.16592	0.0005125	0.00396469
ENSG00000085491	SLC25A24	SLC25A24	0.717933	5.91466	3.88922e-05	0.000446745
ENSG00000028137	TNFRSF1B	TNFRSF1B	0.716635	8.09842	0.000108287	0.00108377
ENSG00000213047	DENND1B	DENND1B	0.71631	5.6176	0.000186319	0.0017226
ENSG00000144136	SLC20A1	SLC20A1	0.714003	6.74096	2.98464e-05	0.000352862
ENSG00000169020	ATP5ME	ATP5ME	0.713647	9.20891	2.76255e-06	4.35191e-05
ENSG00000168439	STIP1	STIP1	0.712938	6.60223	0.00143525	0.00939028
ENSG00000127922	SEM1	SEM1	0.710829	8.72803	6.91694e-05	0.000737281
ENSG00000182557	SPNS3	SPNS3	0.710655	6.32164	0.00039507	0.0031948
ENSG00000113369	ARRDC3	ARRDC3	0.708838	6.81147	0.00158926	0.0102215
ENSG00000134574	DDB2	DDB2	0.708038	5.79915	5.04846e-05	0.000559761
ENSG00000102144	PGK1	PGK1	0.707981	8.92342	2.9591e-05	0.000351212
ENSG00000197780	TAF13	TAF13	0.707923	5.41574	0.000499178	0.00388143
ENSG00000087087	SRRT	SRRT	0.707873	6.57622	0.000126209	0.00123064
ENSG00000174021	GNG5	GNG5	0.706985	8.27837	3.12577e-05	0.000368112
ENSG00000080371	RAB21	RAB21	0.706358	7.24074	5.12422e-05	0.000565062
ENSG00000095564	BTAF1	BTAF1	0.706024	5.95669	5.3239e-05	0.000583366
ENSG00000169045	HNRNPH1	HNRNPH1	0.705541	9.54322	2.37251e-05	0.000288941
ENSG00000174574	AKIRIN1	AKIRIN1	0.704707	7.79139	0.000315764	0.00265618
ENSG00000105643	ARRDC2	ARRDC2	0.704447	6.30874	0.000322693	0.00270322
ENSG00000116489	CAPZA1	CAPZA1	0.702958	8.27186	1.0396e-05	0.00014248
ENSG00000169764	UGP2	UGP2	0.702905	7.97091	2.00802e-05	0.000249052
ENSG00000215301	DDX3X	DDX3X	0.702122	9.10003	0.000167314	0.00158556
ENSG00000221914	PPP2R2A	PPP2R2A	0.701953	6.73596	0.000539836	0.00415656
ENSG00000132274	TRIM22	TRIM22	0.701879	7.3418	0.000313668	0.00264221
ENSG00000102786	INTS6	INTS6	0.701848	6.5244	0.00145407	0.00948273
ENSG00000160584	SIK3	SIK3	0.701678	6.45297	5.80575e-05	0.000633307
ENSG00000162496	DHRS3	DHRS3	0.701619	5.88658	7.7922e-05	0.00081515
ENSG00000205189	ZBTB10	ZBTB10	0.701389	5.5106	0.00564665	0.0288668
ENSG00000120063	GNA13	GNA13	0.701227	6.51528	2.48451e-05	0.00030017
ENSG00000107537	PHYH	PHYH	0.699832	5.52767	0.00157121	0.0101269
ENSG00000171456	ASXL1	ASXL1	0.699062	6.52847	0.00345268	0.0191587
ENSG00000047365	ARAP2	ARAP2	0.699058	7.5547	8.59911e-05	0.000886966
ENSG00000119669	IRF2BPL	IRF2BPL	0.696827	6.3645	9.42914e-05	0.000961139
ENSG00000285171	AL590764.2	AL590764.2	0.695585	5.45193	0.000297915	0.00256291
ENSG00000078596	ITM2A	ITM2A	0.695565	8.71397	0.000334498	0.00279055
ENSG00000168003	SLC3A2	SLC3A2	0.69145	8.12012	5.32869e-05	0.000583366
ENSG00000121410	A1BG	A1BG	0.691322	6.18216	3.59518e-05	0.000416121
ENSG00000173575	CHD2	CHD2	0.690777	7.74841	7.19999e-06	0.000103724
ENSG00000128989	ARPP19	ARPP19	0.689996	7.29091	1.53958e-05	0.000198671
ENSG00000119979	FAM45A	FAM45A	0.689947	5.51522	0.000485001	0.00379063
ENSG00000125534	PPDPF	PPDPF	0.689078	10.4627	2.02778e-06	3.27087e-05
ENSG00000164543	STK17A	STK17A	0.688603	9.14191	0.000278505	0.00241305
ENSG00000171843	MLLT3	MLLT3	0.687994	5.76112	0.00122418	0.00822223
ENSG00000115486	GGCX	GGCX	0.687436	5.22721	7.79534e-05	0.00081515
ENSG00000138378	STAT4	STAT4	0.687309	6.98975	0.000125433	0.00122702
ENSG00000072364	AFF4	AFF4	0.685721	6.68892	0.000196761	0.00180538
ENSG00000111711	GOLT1B	GOLT1B	0.684966	5.50093	0.000980671	0.00691601
ENSG00000113013	HSPA9	HSPA9	0.682474	7.6819	1.43708e-05	0.00018584
ENSG00000135905	DOCK10	DOCK10	0.682333	6.82792	4.53421e-05	0.000509259
ENSG00000197860	SGTB	SGTB	0.681373	5.76589	0.00391385	0.0213275
ENSG00000143851	PTPN7	PTPN7	0.681262	7.46755	9.12914e-05	0.000935275
ENSG00000198900	TOP1	TOP1	0.679923	7.92375	0.000172024	0.00161505
ENSG00000107771	CCSER2	CCSER2	0.679609	8.02292	5.35982e-05	0.000585718
ENSG00000059758	CDK17	CDK17	0.678979	6.19827	0.000223375	0.00201603
ENSG00000113318	MSH3	MSH3	0.678585	5.81615	0.000106226	0.00106665
ENSG00000124214	STAU1	STAU1	0.678191	7.04558	0.000348085	0.00288672
ENSG00000089012	SIRPG	SIRPG	0.678065	5.95634	0.000365708	0.00300544
ENSG00000243716	NPIPB5	NPIPB5	0.677812	4.52403	0.000988936	0.00695811
ENSG00000286646	AL121933.1	AL121933.1	0.674673	5.40449	0.000756345	0.00564235
ENSG00000122557	HERPUD2	HERPUD2	0.674316	7.89684	9.39217e-06	0.000129757
ENSG00000047849	MAP4	MAP4	0.674257	6.44733	3.54674e-05	0.000412879
ENSG00000139278	GLIPR1	GLIPR1	0.674206	8.12026	6.09909e-05	0.000659376
ENSG00000165732	DDX21	DDX21	0.673736	8.37316	9.55643e-06	0.000131727
ENSG00000106415	GLCCI1	GLCCI1	0.673165	5.5552	0.000234739	0.00209059
ENSG00000170892	TSEN34	TSEN34	0.672194	4.90055	0.00102905	0.00717375
ENSG00000169057	MECP2	MECP2	0.671599	7.09287	0.000258607	0.00226002
ENSG00000171988	JMJD1C	JMJD1C	0.671117	7.43865	9.92313e-05	0.00100474
ENSG00000140743	AC092338.1	AC092338.1	0.671006	5.67947	0.000306506	0.00260007
ENSG00000005486	RHBDD2	RHBDD2	0.670828	5.48046	0.00047614	0.003731
ENSG00000184897	H1FX	H1FX	0.669595	9.60257	1.15549e-05	0.000153685
ENSG00000176340	COX8A	COX8A	0.666675	8.88931	8.01274e-06	0.00011328
ENSG00000110330	BIRC2	BIRC2	0.666171	6.37069	6.90807e-05	0.000737281
ENSG00000173230	GOLGB1	GOLGB1	0.664582	7.70521	2.00624e-05	0.000249052
ENSG00000139496	NUP58	NUP58	0.664033	5.0421	0.000980338	0.00691601
ENSG00000105281	SLC1A5	SLC1A5	0.663176	6.60127	5.15733e-05	0.00056768
ENSG00000135414	GDF11	GDF11	0.661617	5.02568	0.000264669	0.00230634
ENSG00000173113	TRMT112	TRMT112	0.659473	9.08439	1.05273e-05	0.000143802
ENSG00000113742	CPEB4	CPEB4	0.658737	5.83828	0.00236402	0.0142522
ENSG00000156030	ELMSAN1	ELMSAN1	0.658596	6.26661	0.0101883	0.0448416
ENSG00000174501	ANKRD36C	ANKRD36C	0.658009	7.23361	0.00024127	0.00213621
ENSG00000006451	RALA	RALA	0.65739	6.37858	0.000614111	0.0046674
ENSG00000165714	BORCS5	BORCS5	0.653071	6.45432	0.000880701	0.00636645
ENSG00000153551	CMTM7	CMTM7	0.651106	5.54424	0.000436542	0.00346095
ENSG00000107485	GATA3	GATA3	0.650785	7.01115	7.2823e-05	0.000770706
ENSG00000115758	ODC1	ODC1	0.650564	7.60912	0.00067096	0.00504885
ENSG00000256060	TRAPPC2B	TRAPPC2B	0.650361	5.06882	0.000306653	0.00260007
ENSG00000165169	DYNLT3	DYNLT3	0.648756	6.1117	0.000257184	0.00225083
ENSG00000166012	TAF1D	TAF1D	0.645155	8.55689	0.000165759	0.00157845
ENSG00000152229	PSTPIP2	PSTPIP2	0.645044	5.90017	0.00617429	0.030846
ENSG00000145354	CISD2	CISD2	0.644491	6.57072	0.00264543	0.0157145
ENSG00000104419	NDRG1	NDRG1	0.644318	6.02346	0.000390844	0.00316908
ENSG00000151466	SCLT1	SCLT1	0.644052	5.92892	0.00116591	0.00788079
ENSG00000148908	RGS10	RGS10	0.643349	8.64914	0.000677835	0.00509426
ENSG00000185338	SOCS1	SOCS1	0.643223	9.05824	0.000224143	0.00201851
ENSG00000116815	CD58	CD58	0.642857	5.99746	0.000309767	0.00261298
ENSG00000115540	MOB4	MOB4	0.642181	6.98882	0.00168299	0.0107786
ENSG00000120675	DNAJC15	DNAJC15	0.64205	7.30363	4.56346e-05	0.000510653
ENSG00000179912	R3HDM2	R3HDM2	0.641966	7.51718	7.93812e-05	0.000827228
ENSG00000104164	BLOC1S6	BLOC1S6	0.641345	5.72848	0.000166043	0.00157845
ENSG00000154642	C21orf91	C21orf91	0.63966	5.67129	0.00213399	0.0130866
ENSG00000168564	CDKN2AIP	CDKN2AIP	0.639061	6.40059	0.000151837	0.00146173
ENSG00000094975	SUCO	SUCO	0.637129	6.0853	0.00173776	0.0110361
ENSG00000136560	TANK	TANK	0.637072	7.07563	0.00272066	0.0160202
ENSG00000101082	SLA2	SLA2	0.636972	6.75008	0.000646995	0.00488063
ENSG00000217555	CKLF	CKLF	0.636739	9.05328	6.54495e-05	0.000703109
ENSG00000100796	PPP4R3A	PPP4R3A	0.636703	6.94919	0.000160385	0.00153428
ENSG00000007392	LUC7L	LUC7L	0.635108	6.14112	0.00023141	0.00206701
ENSG00000168234	TTC39C	TTC39C	0.634691	7.14996	0.000112751	0.00111921
ENSG00000173674	EIF1AX	EIF1AX	0.634214	8.05791	0.000211375	0.00192491
ENSG00000115525	ST3GAL5	ST3GAL5	0.633855	6.01075	0.00177635	0.0112342
ENSG00000141582	CBX4	CBX4	0.631735	6.6519	0.000804706	0.00595188
ENSG00000135241	PNPLA8	PNPLA8	0.630985	6.13534	0.00142845	0.009366
ENSG00000268230	AC012313.3	AC012313.3	0.63088	6.09407	0.00017848	0.0016628
ENSG00000123395	ATG101	ATG101	0.629747	6.22328	0.000212911	0.00193309
ENSG00000154473	BUB3	BUB3	0.629518	8.23237	0.000865145	0.00628395
ENSG00000188739	RBM34	RBM34	0.628228	6.0313	0.00275905	0.0161834
ENSG00000135334	AKIRIN2	AKIRIN2	0.62814	7.72846	4.38803e-05	0.000496518
ENSG00000123983	ACSL3	ACSL3	0.627952	6.01627	0.000491414	0.00383088
ENSG00000196873	CBWD3	CBWD3	0.626705	6.25926	0.00152183	0.00987137
ENSG00000117450	PRDX1	PRDX1	0.626268	8.71779	5.91457e-05	0.000642865
ENSG00000069667	RORA	RORA	0.624708	8.16275	0.000302527	0.00259156
ENSG00000122203	KIAA1191	KIAA1191	0.62401	5.29316	0.00148333	0.00964246
ENSG00000109452	INPP4B	INPP4B	0.623421	6.67261	0.0011342	0.0077553
ENSG00000272888	LINC01578	LINC01578	0.623241	8.00255	0.000242194	0.00214127
ENSG00000187608	ISG15	ISG15	0.621616	8.30146	0.00166844	0.010708
ENSG00000110713	NUP98	NUP98	0.620623	5.40364	0.000638511	0.00482864
ENSG00000128590	DNAJB9	DNAJB9	0.620206	6.27953	0.00560551	0.0287626
ENSG00000171867	PRNP	PRNP	0.620086	7.06836	0.000465678	0.00365847
ENSG00000135870	RC3H1	RC3H1	0.619672	6.99052	0.00103304	0.00719331
ENSG00000120709	FAM53C	FAM53C	0.619481	5.42031	0.00336356	0.018854
ENSG00000213626	LBH	LBH	0.618938	7.82261	0.0055482	0.0284927
ENSG00000168610	STAT3	STAT3	0.618845	7.57119	0.000509855	0.00394926
ENSG00000178127	NDUFV2	NDUFV2	0.618528	7.40816	0.000303934	0.00259412
ENSG00000196843	ARID5A	ARID5A	0.61821	7.23518	0.000299775	0.00257526
ENSG00000113387	SUB1	SUB1	0.617408	10.2353	0.000109317	0.00109047
ENSG00000250479	CHCHD10	CHCHD10	0.61613	8.34385	0.000306007	0.00260007
ENSG00000147044	CASK	CASK	0.616115	6.46318	0.00283496	0.0165169
ENSG00000170027	YWHAG	YWHAG	0.615394	5.68086	0.00100523	0.00704822
ENSG00000164111	ANXA5	ANXA5	0.614838	7.98359	0.000414826	0.00333235
ENSG00000010404	IDS	IDS	0.614315	8.04624	0.00196874	0.012234
ENSG00000138495	COX17	COX17	0.612143	8.26675	0.000939528	0.00668807
ENSG00000127526	SLC35E1	SLC35E1	0.610822	4.60762	0.00158362	0.010196
ENSG00000064547	LPAR2	LPAR2	0.610722	5.78647	0.00189269	0.0118748
ENSG00000272447	AL135925.1	AL135925.1	0.610602	5.35822	0.00129537	0.00861448
ENSG00000121274	TENT4B	TENT4B	0.606198	5.20095	0.00190445	0.0119077
ENSG00000237343	AC246785.3	AC246785.3	0.604779	5.21115	0.00993496	0.0440465
ENSG00000113263	ITK	ITK	0.604482	6.78682	0.00174413	0.011065
ENSG00000134324	LPIN1	LPIN1	0.603251	6.74254	0.000171276	0.00161505
ENSG00000126524	SBDS	SBDS	0.6016	8.11307	0.00660964	0.0324595
ENSG00000105329	TGFB1	TGFB1	0.601129	8.48812	0.000184745	0.00171502
ENSG00000196110	ZNF699	ZNF699	0.599958	5.41515	0.00193471	0.012072
ENSG00000214367	HAUS3	HAUS3	0.599386	5.7374	0.00133383	0.00884121
ENSG00000122042	UBL3	UBL3	0.596617	7.05062	0.000930719	0.00665662
ENSG00000048991	R3HDM1	R3HDM1	0.594818	5.63491	0.00212748	0.0130599
ENSG00000183155	RABIF	RABIF	0.594577	5.69064	0.00495195	0.0259646
ENSG00000164691	TAGAP	TAGAP	0.594138	7.70586	0.00112545	0.00772155
ENSG00000154582	ELOC	ELOC	0.593086	7.256	0.00030221	0.00259156
ENSG00000124228	DDX27	DDX27	0.592646	7.29255	0.00082478	0.00604141
ENSG00000106615	RHEB	RHEB	0.5917	7.29815	0.000416613	0.00334227
ENSG00000221883	ARIH2OS	ARIH2OS	0.590733	5.44199	0.00924394	0.0416218
ENSG00000136371	MTHFS	MTHFS	0.590089	5.81752	0.00260897	0.0155436
ENSG00000160213	CSTB	CSTB	0.589771	9.02401	0.000290178	0.00250346
ENSG00000265241	RBM8A	RBM8A	0.588654	8.76809	0.00023032	0.00206031
ENSG00000105810	CDK6	CDK6	0.58751	6.54664	0.00170674	0.0108834
ENSG00000080503	SMARCA2	SMARCA2	0.587261	7.12036	0.000262509	0.00229081
ENSG00000243449	C4orf48	C4orf48	0.586572	7.89677	0.000304108	0.00259412
ENSG00000179029	TMEM107	TMEM107	0.586476	6.61793	0.00273768	0.0160892
ENSG00000109046	WSB1	WSB1	0.586426	7.94326	0.000175348	0.00163614
ENSG00000145365	TIFA	TIFA	0.586272	5.58468	0.00367627	0.0202145
ENSG00000112406	HECA	HECA	0.586251	7.165	0.00286185	0.0166415
ENSG00000132965	ALOX5AP	ALOX5AP	0.586116	8.84082	0.00825153	0.0382611
ENSG00000197381	ADARB1	ADARB1	0.585264	5.48335	0.00597876	0.0301624
ENSG00000101856	PGRMC1	PGRMC1	0.585091	5.78841	0.0024752	0.0148782
ENSG00000123091	RNF11	RNF11	0.584749	5.57629	0.00772843	0.0366634
ENSG00000197728	RPS26	RPS26	0.583713	12.2791	0.000431456	0.0034251
ENSG00000182534	MXRA7	MXRA7	0.583467	6.25989	0.00339148	0.0189754
ENSG00000134242	PTPN22	PTPN22	0.583264	7.82353	0.000389009	0.00316095
ENSG00000027869	SH2D2A	SH2D2A	0.582655	7.91755	0.00195799	0.0122047
ENSG00000277957	SENP3-EIF4A1	SENP3-EIF4A1	0.58257	8.04552	0.00123178	0.0082641
ENSG00000183054	RGPD6	RGPD6	0.581174	4.50202	0.00326752	0.0184007
ENSG00000139372	TDG	TDG	0.580662	6.60513	0.000392408	0.00317751
ENSG00000198176	TFDP1	TFDP1	0.580597	6.15414	0.00380362	0.0208204
ENSG00000162688	AGL	AGL	0.579798	5.75044	0.000763606	0.00568254
ENSG00000172340	SUCLG2	SUCLG2	0.579529	5.67819	0.00113853	0.00776738
ENSG00000137073	UBAP2	UBAP2	0.579465	6.03341	0.00209255	0.0128715
ENSG00000143256	PFDN2	PFDN2	0.579271	7.75675	0.000234469	0.00209059
ENSG00000185418	TARSL2	TARSL2	0.576505	7.13568	0.000898191	0.00645441
ENSG00000105402	NAPA	NAPA	0.57649	5.73492	0.00187705	0.0118095
ENSG00000130958	SLC35D2	SLC35D2	0.576286	5.42135	0.00263821	0.0157024
ENSG00000124193	SRSF6	SRSF6	0.576223	5.95893	0.00504108	0.0263798
ENSG00000087884	AAMDC	AAMDC	0.575986	5.27479	0.00320477	0.0181484
ENSG00000077238	IL4R	IL4R	0.572804	5.41558	0.00579749	0.0293749
ENSG00000126777	KTN1	KTN1	0.571285	8.27978	0.000235843	0.00209734
ENSG00000158122	PRXL2C	PRXL2C	0.571223	6.39363	0.00840609	0.0387703
ENSG00000163320	CGGBP1	CGGBP1	0.570532	7.40086	0.00156013	0.0100822
ENSG00000100138	SNU13	SNU13	0.56983	8.91106	0.000135367	0.0013157
ENSG00000182628	SKA2	SKA2	0.569722	6.45523	0.00350522	0.0194148
ENSG00000158985	CDC42SE2	CDC42SE2	0.569276	7.41349	0.000442732	0.00350088
ENSG00000105968	H2AFV	H2AFV	0.566987	8.14327	0.000832564	0.00608374
ENSG00000117222	RBBP5	RBBP5	0.566981	5.40646	0.00523015	0.0272048
ENSG00000175265	GOLGA8A	GOLGA8A	0.566057	7.93823	0.000226424	0.00203446
ENSG00000145860	RNF145	RNF145	0.565843	6.60272	0.00444354	0.0237237
ENSG00000138964	PARVG	PARVG	0.565103	6.30547	0.002644	0.0157145
ENSG00000015153	YAF2	YAF2	0.562985	6.67487	0.00436861	0.0233647
ENSG00000243811	APOBEC3D	APOBEC3D	0.562888	4.76339	0.00670596	0.0327469
ENSG00000138646	HERC5	HERC5	0.562675	5.89638	0.00461077	0.0244657
ENSG00000094916	CBX5	CBX5	0.562166	6.538	0.000422394	0.00337082
ENSG00000174953	DHX36	DHX36	0.561856	8.27996	0.000515975	0.00398648
ENSG00000196284	SUPT3H	SUPT3H	0.561466	6.10447	0.00110432	0.00761104
ENSG00000102921	AC026470.1	AC026470.1	0.561464	6.92569	0.000401719	0.00323562
ENSG00000159840	ZYX	ZYX	0.56092	6.55242	0.00343686	0.019141
ENSG00000152969	JAKMIP1	JAKMIP1	0.560332	5.09137	0.00421319	0.0226735
ENSG00000112773	TENT5A	TENT5A	0.558799	4.93269	0.00264954	0.0157236
ENSG00000131507	NDFIP1	NDFIP1	0.558579	8.31771	0.000191326	0.0017662
ENSG00000185477	GPRIN3	GPRIN3	0.558519	7.33274	0.00495317	0.0259646
ENSG00000174579	MSL2	MSL2	0.556598	6.18988	0.00326112	0.0183817
ENSG00000141664	ZCCHC2	ZCCHC2	0.55582	5.71125	0.0028295	0.0165009
ENSG00000189136	UBE2Q2P1	UBE2Q2P1	0.555685	5.24287	0.00330018	0.0185329
ENSG00000221823	PPP3R1	PPP3R1	0.554425	4.66713	0.00357515	0.01973
ENSG00000135926	TMBIM1	TMBIM1	0.553946	6.04559	0.00228808	0.0138495
ENSG00000101445	PPP1R16B	PPP1R16B	0.552824	5.53645	0.00370495	0.0203537
ENSG00000175768	TOMM5	TOMM5	0.552803	8.07171	0.000195493	0.00179646
ENSG00000129625	REEP5	REEP5	0.552101	8.55449	0.00030301	0.00259204
ENSG00000020426	MNAT1	MNAT1	0.55008	6.499	0.00206017	0.012711
ENSG00000131013	PPIL4	PPIL4	0.549982	6.61023	0.0013725	0.0090678
ENSG00000197579	TOPORS	TOPORS	0.549494	6.24338	0.0107743	0.0468096
ENSG00000002549	LAP3	LAP3	0.5487	6.44246	0.00789843	0.0372563
ENSG00000114416	FXR1	FXR1	0.546689	7.1174	0.0019648	0.0122221
ENSG00000174946	GPR171	GPR171	0.545941	7.42475	0.00128422	0.00856854
ENSG00000067082	KLF6	KLF6	0.545239	8.79656	0.00279336	0.0163597
ENSG00000213145	CRIP1	CRIP1	0.545012	10.5739	0.000331419	0.00276867
ENSG00000177337	DLGAP1-AS1	DLGAP1-AS1	0.54468	5.92503	0.00650194	0.0320917
ENSG00000147050	KDM6A	KDM6A	0.543495	5.40887	0.00316191	0.0179879
ENSG00000131051	RBM39	RBM39	0.543401	10.0809	0.000770141	0.00572415
ENSG00000163565	IFI16	IFI16	0.542386	8.6044	0.00517403	0.0269824
ENSG00000099875	MKNK2	MKNK2	0.542229	7.0038	0.00681973	0.0331689
ENSG00000124226	RNF114	RNF114	0.54212	6.54359	0.00316752	0.0179879
ENSG00000213300	HNRNPA3P6	HNRNPA3P6	0.541711	4.85163	0.0033957	0.0189792
ENSG00000181704	YIPF6	YIPF6	0.539881	5.67623	0.00339842	0.0189792
ENSG00000100393	EP300	EP300	0.53957	6.62806	0.00503184	0.0263542
ENSG00000185883	ATP6V0C	ATP6V0C	0.539426	7.3052	0.00156365	0.0100889
ENSG00000126246	IGFLR1	IGFLR1	0.536969	6.17061	0.00415728	0.0223924
ENSG00000171735	CAMTA1	CAMTA1	0.535229	6.40544	0.00101943	0.00713954
ENSG00000163584	RPL22L1	RPL22L1	0.535119	8.9338	0.000442098	0.00350042
ENSG00000145241	CENPC	CENPC	0.534212	7.6314	0.000694982	0.00521666
ENSG00000162231	NXF1	NXF1	0.532514	5.36291	0.00423548	0.022753
ENSG00000081870	HSPB11	HSPB11	0.532356	7.04287	0.00175632	0.0111191
ENSG00000111775	COX6A1	COX6A1	0.532334	9.16654	0.000597776	0.00456613
ENSG00000006125	AP2B1	AP2B1	0.53222	5.24015	0.00957437	0.0428234
ENSG00000131174	COX7B	COX7B	0.531703	9.35095	0.000488994	0.00381692
ENSG00000111897	SERINC1	SERINC1	0.529748	7.13258	0.00856227	0.039341
ENSG00000012660	ELOVL5	ELOVL5	0.529213	6.43069	0.00600424	0.0301955
ENSG00000112081	SRSF3	SRSF3	0.528401	9.69458	0.000808455	0.00597233
ENSG00000086712	TXLNG	TXLNG	0.528067	6.10418	0.00147604	0.00960535
ENSG00000187239	FNBP1	FNBP1	0.528024	8.50736	0.00196143	0.0122137
ENSG00000260272	AC093525.2	AC093525.2	0.5277	7.29134	0.00227779	0.0138148
ENSG00000178607	ERN1	ERN1	0.526914	6.9647	0.00789333	0.0372563
ENSG00000065243	PKN2	PKN2	0.526808	6.77604	0.00271517	0.016019
ENSG00000108946	PRKAR1A	PRKAR1A	0.526042	6.5794	0.00141001	0.0092752
ENSG00000139620	KANSL2	KANSL2	0.526002	5.83906	0.00702971	0.0339452
ENSG00000287070	AL499604.1	AL499604.1	0.525143	5.57095	0.00514731	0.0268893
ENSG00000089280	FUS	FUS	0.524655	9.6057	0.00358643	0.019759
ENSG00000137288	UQCC2	UQCC2	0.524647	6.78791	0.0086414	0.0395847
ENSG00000163781	TOPBP1	TOPBP1	0.523846	5.96521	0.00800982	0.0375132
ENSG00000168273	SMIM4	SMIM4	0.523789	5.69992	0.00604139	0.0302818
ENSG00000130770	ATP5IF1	ATP5IF1	0.521613	9.31846	0.000870628	0.00630868
ENSG00000108091	CCDC6	CCDC6	0.521508	5.85159	0.00818874	0.0380573
ENSG00000106399	RPA3	RPA3	0.520858	7.49042	0.00281845	0.0164748
ENSG00000076554	TPD52	TPD52	0.520215	5.81299	0.00711697	0.0342575
ENSG00000139163	ETNK1	ETNK1	0.51977	6.73654	0.00214164	0.0130938
ENSG00000142599	RERE	RERE	0.51965	5.53128	0.00998332	0.044164
ENSG00000109670	FBXW7	FBXW7	0.519635	6.70419	0.00539189	0.0278551
ENSG00000122565	CBX3	CBX3	0.519147	8.30779	0.000611902	0.00465644
ENSG00000173915	ATP5MD	ATP5MD	0.518548	9.70492	0.000426869	0.00339759
ENSG00000234663	LINC01934	LINC01934	0.51778	6.4655	0.00650011	0.0320917
ENSG00000008952	SEC62	SEC62	0.516716	8.95648	0.00103942	0.00722942
ENSG00000241489	AC244197.3	AC244197.3	0.51533	5.79093	0.00553259	0.0284366
ENSG00000165644	COMTD1	COMTD1	0.514825	6.41096	0.00536083	0.0277655
ENSG00000143013	LMO4	LMO4	0.514277	6.80442	0.00814459	0.0379393
ENSG00000147548	NSD3	NSD3	0.513464	8.46059	0.00297973	0.0171624
ENSG00000130956	HABP4	HABP4	0.513417	5.32367	0.0105052	0.0459364
ENSG00000163527	STT3B	STT3B	0.513265	7.17598	0.00108296	0.0074979
ENSG00000152404	CWF19L2	CWF19L2	0.512376	7.07807	0.00705189	0.0340252
ENSG00000104472	CHRAC1	CHRAC1	0.512086	6.77168	0.0030233	0.0173475
ENSG00000007168	PAFAH1B1	PAFAH1B1	0.51207	7.69969	0.00564961	0.0288668
ENSG00000259781	HMGB1P6	HMGB1P6	0.510519	6.26663	0.00571321	0.0290896
ENSG00000135976	ANKRD36	ANKRD36	0.509917	7.03134	0.00666885	0.0325919
ENSG00000131375	CAPN7	CAPN7	0.508384	6.20078	0.00308196	0.0175977
ENSG00000077458	FAM76B	FAM76B	0.507669	6.12017	0.00601637	0.0302314
ENSG00000173436	MICOS10	MICOS10	0.507559	8.49722	0.00129054	0.00859377
ENSG00000081019	RSBN1	RSBN1	0.507093	7.48796	0.00114239	0.00777621
ENSG00000145216	FIP1L1	FIP1L1	0.506087	6.43756	0.00279449	0.0163597
ENSG00000079332	SAR1A	SAR1A	0.505549	7.43515	0.00519352	0.0270607
ENSG00000181350	LRRC75A	LRRC75A	0.504505	6.34421	0.00334273	0.0187546
ENSG00000112304	ACOT13	ACOT13	0.50429	6.15482	0.00378846	0.0207749
ENSG00000109220	CHIC2	CHIC2	0.503754	6.71871	0.00562808	0.0288297
ENSG00000173272	MZT2A	MZT2A	0.50325	8.57476	0.00112445	0.00772155
ENSG00000159086	PAXBP1	PAXBP1	0.501827	6.12075	0.00750683	0.0358495
ENSG00000178691	SUZ12	SUZ12	0.501049	7.23676	0.00249211	0.014965
ENSG00000163399	ATP1A1	ATP1A1	0.500923	6.67891	0.00352958	0.0195289
ENSG00000159884	CCDC107	CCDC107	0.500869	8.55166	0.00268928	0.0159282
ENSG00000152795	HNRNPDL	HNRNPDL	0.499351	9.97731	0.00081435	0.00597946
ENSG00000184983	NDUFA6	NDUFA6	0.498777	8.07816	0.00319539	0.0181292
ENSG00000196912	ANKRD36B	ANKRD36B	0.495691	6.96883	0.00254201	0.0152194
ENSG00000004455	AK2	AK2	0.495307	6.05023	0.00426379	0.0228849
ENSG00000122694	GLIPR2	GLIPR2	0.495227	7.84971	0.00957108	0.0428234
ENSG00000101882	NKAP	NKAP	0.494639	7.062	0.0079304	0.0372563
ENSG00000139793	MBNL2	MBNL2	0.493604	5.91272	0.00862011	0.0395469
ENSG00000141380	AC091021.1	AC091021.1	0.492527	6.32257	0.00344102	0.0191466
ENSG00000111670	GNPTAB	GNPTAB	0.491178	7.40548	0.00541896	0.0279473
ENSG00000135655	USP15	USP15	0.491129	7.7899	0.00571873	0.0290896
ENSG00000269893	SNHG8	SNHG8	0.490281	9.42912	0.00172147	0.0109442
ENSG00000047346	FAM214A	FAM214A	0.489142	5.97926	0.00447827	0.023888
ENSG00000163349	HIPK1	HIPK1	0.489011	7.01103	0.00625735	0.0312096
ENSG00000070961	ATP2B1	ATP2B1	0.48765	7.18536	0.00228678	0.0138495
ENSG00000132341	RAN	RAN	0.48658	9.32489	0.00336927	0.0188685
ENSG00000237943	PRKCQ-AS1	PRKCQ-AS1	0.486321	7.05721	0.00821847	0.0381662
ENSG00000028310	BRD9	BRD9	0.485933	7.04698	0.0102387	0.0449982
ENSG00000181274	FRAT2	FRAT2	0.485656	6.40771	0.00770821	0.0366095
ENSG00000260032	NORAD	NORAD	0.484872	7.27514	0.00889646	0.040387
ENSG00000196967	ZNF585A	ZNF585A	0.48454	5.00362	0.00990377	0.0439725
ENSG00000159461	AMFR	AMFR	0.484491	5.37072	0.00683473	0.0332153
ENSG00000241058	NSUN6	NSUN6	0.483758	5.23311	0.0107415	0.0467005
ENSG00000153187	HNRNPU	HNRNPU	0.483532	9.49923	0.00170651	0.0108834
ENSG00000091527	CDV3	CDV3	0.483133	8.60578	0.00108146	0.00749608
ENSG00000008282	SYPL1	SYPL1	0.483119	6.71972	0.00594224	0.030008
ENSG00000138814	PPP3CA	PPP3CA	0.481995	7.06831	0.00544558	0.0280607
ENSG00000143977	SNRPG	SNRPG	0.481181	8.73282	0.00428008	0.0229317
ENSG00000138641	HERC3	HERC3	0.479662	4.83368	0.0107337	0.0467005
ENSG00000143401	ANP32E	ANP32E	0.479459	8.06022	0.00316474	0.0179879
ENSG00000068305	MEF2A	MEF2A	0.478884	5.24259	0.0111879	0.0482609
ENSG00000166595	CIAO2B	CIAO2B	0.478567	8.33031	0.00323966	0.0182983
ENSG00000211456	SACM1L	SACM1L	0.477497	6.4537	0.010366	0.045426
ENSG00000141551	CSNK1D	CSNK1D	0.477079	6.16194	0.00344848	0.0191584
ENSG00000010017	RANBP9	RANBP9	0.476817	5.72961	0.0100967	0.0445354
ENSG00000142396	ERVK3-1	ERVK3-1	0.476586	6.1246	0.00730343	0.0350161
ENSG00000164933	SLC25A32	SLC25A32	0.476301	4.8727	0.0106641	0.0464972
ENSG00000111790	FGFR1OP2	FGFR1OP2	0.476186	8.24043	0.00119207	0.00802433
ENSG00000170004	CHD3	CHD3	0.476027	7.3328	0.00309773	0.0176411
ENSG00000137501	SYTL2	SYTL2	0.475839	6.67363	0.00599647	0.0301814
ENSG00000166848	TERF2IP	TERF2IP	0.474689	8.50025	0.00513197	0.0268323
ENSG00000166747	AP1G1	AP1G1	0.47264	5.84251	0.0096373	0.0430414
ENSG00000152601	MBNL1	MBNL1	0.471792	8.67032	0.00230803	0.0139424
ENSG00000117592	PRDX6	PRDX6	0.470145	8.33953	0.00308519	0.0175977
ENSG00000104904	OAZ1	OAZ1	0.469015	10.5423	0.0034768	0.0192749
ENSG00000120533	ENY2	ENY2	0.46884	8.25663	0.00584441	0.0295633
ENSG00000122218	COPA	COPA	0.467914	6.84371	0.00919795	0.0414763
ENSG00000140995	DEF8	DEF8	0.467821	4.85056	0.0112729	0.0484552
ENSG00000147669	POLR2K	POLR2K	0.467585	8.00639	0.00548954	0.0282632
ENSG00000123728	RAP2C	RAP2C	0.467109	6.26635	0.00762622	0.0363054
ENSG00000196792	STRN3	STRN3	0.466235	5.49318	0.00782774	0.0370033
ENSG00000106952	TNFSF8	TNFSF8	0.465853	5.68431	0.00698798	0.0338224
ENSG00000151414	NEK7	NEK7	0.465733	6.20751	0.0103086	0.0452399
ENSG00000145734	BDP1	BDP1	0.464549	7.71534	0.00260716	0.0155436
ENSG00000143753	DEGS1	DEGS1	0.464215	7.10948	0.00631387	0.0314139
ENSG00000117616	RSRP1	RSRP1	0.463645	8.63225	0.00270582	0.0159999
ENSG00000168175	MAPK1IP1L	MAPK1IP1L	0.462312	6.89816	0.00414739	0.022359
ENSG00000147854	UHRF2	UHRF2	0.461995	6.22661	0.00775174	0.0367299
ENSG00000127914	AKAP9	AKAP9	0.461804	8.5838	0.00165661	0.0106434
ENSG00000126391	FRMD8	FRMD8	0.460119	5.53531	0.0110797	0.0478619
ENSG00000115520	COQ10B	COQ10B	0.459743	6.94897	0.00830327	0.0384422
ENSG00000140455	USP3	USP3	0.458058	6.46513	0.0100381	0.044374
ENSG00000169627	BOLA2B	BOLA2B	0.457869	7.16196	0.0040788	0.0220691
ENSG00000102572	STK24	STK24	0.457432	6.17027	0.00854158	0.0392757
ENSG00000115935	WIPF1	WIPF1	0.454083	8.08481	0.00203866	0.0125911
ENSG00000119705	SLIRP	SLIRP	0.452981	7.21513	0.00918911	0.0414672
ENSG00000164405	UQCRQ	UQCRQ	0.452847	8.90121	0.00319849	0.0181298
ENSG00000286065	AC015911.11	AC015911.11	0.452663	5.84146	0.0104444	0.0457036
ENSG00000101654	RNMT	RNMT	0.448586	7.52281	0.00860507	0.0395078
ENSG00000047188	YTHDC2	YTHDC2	0.448558	6.08044	0.0112727	0.0484552
ENSG00000156475	PPP2R2B	PPP2R2B	0.448047	6.62695	0.00684222	0.0332251
ENSG00000115464	USP34	USP34	0.446474	7.33261	0.00921982	0.041544
ENSG00000129315	CCNT1	CCNT1	0.445726	6.1551	0.00807089	0.0376249
ENSG00000070756	PABPC1	PABPC1	0.445112	9.5067	0.00806517	0.0376249
ENSG00000057663	ATG5	ATG5	0.442488	5.75744	0.00938814	0.0422397
ENSG00000154451	GBP5	GBP5	0.442167	7.78556	0.00798195	0.0374405
ENSG00000205581	HMGN1	HMGN1	0.441804	9.62051	0.00321018	0.018162
ENSG00000196950	SLC39A10	SLC39A10	0.441144	5.93823	0.0112617	0.0484552
ENSG00000106603	COA1	COA1	0.438662	5.93628	0.0108788	0.0471284
ENSG00000124203	ZNF831	ZNF831	0.437542	7.01814	0.0110584	0.0478383
ENSG00000069345	DNAJA2	DNAJA2	0.435719	7.66372	0.00804623	0.0375677
ENSG00000164151	ICE1	ICE1	0.435716	6.82638	0.00661675	0.0324681
ENSG00000065135	GNAI3	GNAI3	0.435062	7.48497	0.00407906	0.0220691
ENSG00000087088	BAX	BAX	0.433178	8.57504	0.00282048	0.0164748
ENSG00000233016	SNHG7	SNHG7	0.429987	7.53124	0.0101064	0.0445458
ENSG00000215252	GOLGA8B	GOLGA8B	0.428953	7.89996	0.0081772	0.0380519
ENSG00000124795	DEK	DEK	0.428465	9.11318	0.00969557	0.0432062
ENSG00000103769	RAB11A	RAB11A	0.428047	7.16026	0.00792068	0.0372563
ENSG00000114796	KLHL24	KLHL24	0.426281	6.43704	0.00986917	0.0438831
ENSG00000005483	KMT2E	KMT2E	0.426224	9.10323	0.00638967	0.0317131
ENSG00000170791	CHCHD7	CHCHD7	0.424437	7.06938	0.00837129	0.0386392
ENSG00000005022	SLC25A5	SLC25A5	0.422852	9.18848	0.007495	0.0358212
ENSG00000101557	USP14	USP14	0.4202	6.68365	0.0114299	0.0490606
ENSG00000135046	ANXA1	ANXA1	0.419417	10.5224	0.00912383	0.0412648
ENSG00000109536	FRG1	FRG1	0.418745	7.62138	0.0112126	0.0483331
ENSG00000110321	EIF4G2	EIF4G2	0.417907	8.81612	0.00539155	0.0278551
ENSG00000119632	IFI27L2	IFI27L2	0.417777	8.05716	0.00769293	0.0365656
ENSG00000172725	CORO1B	CORO1B	0.415998	10.574	0.00947959	0.0424621
ENSG00000232112	TMA7	TMA7	0.414743	11.3594	0.00495295	0.0259646
ENSG00000107742	SPOCK2	SPOCK2	0.412269	9.20317	0.00885135	0.0402123
ENSG00000147168	IL2RG	IL2RG	0.411787	8.56699	0.0084948	0.0390936
ENSG00000083896	YTHDC1	YTHDC1	0.410109	8.05435	0.00878423	0.0399672
ENSG00000127184	COX7C	COX7C	0.409676	11.011	0.0054023	0.027885
ENSG00000140264	SERF2	SERF2	0.40849	11.511	0.0061983	0.0309405
ENSG00000196262	PPIA	PPIA	0.408198	9.79136	0.00647849	0.032049
ENSG00000122566	HNRNPA2B1	HNRNPA2B1	0.404711	10.4515	0.00628357	0.0313146
ENSG00000183336	BOLA2	BOLA2	0.396009	7.38885	0.0114706	0.0492004
ENSG00000065518	NDUFB4	NDUFB4	0.390389	8.82725	0.0105773	0.0461851
ENSG00000164924	YWHAZ	YWHAZ	0.381785	9.1694	0.0087188	0.0398523
ENSG00000112739	PRPF4B	PRPF4B	0.381462	8.35542	0.0098058	0.0436653
ENSG00000125356	NDUFA1	NDUFA1	0.380662	9.6728	0.00881372	0.0400714
ENSG00000254999	BRK1	BRK1	-0.400278	8.70751	0.00833106	0.0385121
ENSG00000122034	GTF3A	GTF3A	-0.401674	9.48671	0.00790773	0.0372563
ENSG00000132485	ZRANB2	ZRANB2	-0.403029	8.45157	0.00706746	0.0340462
ENSG00000108561	C1QBP	C1QBP	-0.404938	8.29139	0.00901411	0.0408599
ENSG00000116459	ATP5PB	ATP5PB	-0.410799	7.93091	0.00773165	0.0366634
ENSG00000163468	CCT3	CCT3	-0.412691	7.95913	0.00753304	0.0359464
ENSG00000187051	RPS19BP1	RPS19BP1	-0.415318	8.37725	0.00646565	0.0320116
ENSG00000089009	AC004086.1	AC004086.1	-0.416563	12.9906	0.00945312	0.0424621
ENSG00000141480	ARRB2	ARRB2	-0.418693	7.8192	0.00688061	0.0333581
ENSG00000184922	FMNL1	FMNL1	-0.419572	7.98492	0.00777317	0.036774
ENSG00000103035	PSMD7	PSMD7	-0.420569	7.48624	0.0115087	0.0492895
ENSG00000147065	MSN	MSN	-0.422156	9.1692	0.00657298	0.0323581
ENSG00000175390	EIF3F	EIF3F	-0.42594	9.79203	0.00673038	0.0328397
ENSG00000100201	DDX17	DDX17	-0.429778	9.19804	0.00800798	0.0375132
ENSG00000090863	GLG1	GLG1	-0.430237	6.89857	0.0113874	0.0489124
ENSG00000163479	SSR2	SSR2	-0.436261	9.96992	0.00412324	0.0222486
ENSG00000196776	CD47	CD47	-0.437421	8.74403	0.0028223	0.0164748
ENSG00000054118	THRAP3	THRAP3	-0.439676	8.27046	0.00914619	0.04131
ENSG00000182866	LCK	LCK	-0.440844	9.20682	0.00452156	0.0240555
ENSG00000163131	CTSS	CTSS	-0.442709	7.35091	0.00804573	0.0375677
ENSG00000198821	CD247	CD247	-0.443697	9.35761	0.00324331	0.0182983
ENSG00000136490	LIMD2	LIMD2	-0.444987	8.00859	0.00572199	0.0290896
ENSG00000142227	EMP3	EMP3	-0.451328	10.0766	0.00563779	0.028855
ENSG00000109083	IFT20	IFT20	-0.451579	6.81615	0.0115158	0.0492895
ENSG00000173418	NAA20	NAA20	-0.451652	6.56905	0.0114815	0.0492123
ENSG00000157191	NECAP2	NECAP2	-0.451746	7.06014	0.00650301	0.0320917
ENSG00000110108	TMEM109	TMEM109	-0.453299	7.22782	0.00877406	0.0399614
ENSG00000100836	PABPN1	PABPN1	-0.453554	8.3641	0.00655535	0.0322975
ENSG00000273154	AL121845.3	AL121845.3	-0.455371	8.80425	0.00344947	0.0191584
ENSG00000168101	NUDT16L1	NUDT16L1	-0.456413	7.22839	0.00675687	0.0329425
ENSG00000139433	GLTP	GLTP	-0.456534	6.85737	0.0107391	0.0467005
ENSG00000214078	CPNE1	CPNE1	-0.457901	7.85148	0.0027418	0.0160978
ENSG00000159023	EPB41	EPB41	-0.458187	7.83624	0.00729581	0.0350072
ENSG00000166946	CCNDBP1	CCNDBP1	-0.462797	7.81202	0.00327357	0.0184176
ENSG00000105887	MTPN	MTPN	-0.464564	8.14993	0.00358691	0.019759
ENSG00000108219	TSPAN14	TSPAN14	-0.466544	7.13318	0.00765233	0.0364011
ENSG00000158805	ZNF276	ZNF276	-0.466863	6.98599	0.00712334	0.0342609
ENSG00000172086	KRCC1	KRCC1	-0.468759	6.28642	0.0111667	0.0482037
ENSG00000185187	SIGIRR	SIGIRR	-0.469737	8.31076	0.00676687	0.0329606
ENSG00000214253	FIS1	FIS1	-0.470383	8.53842	0.00480333	0.0253103
ENSG00000103266	STUB1	STUB1	-0.472173	8.27998	0.00392482	0.0213681
ENSG00000110876	SELPLG	SELPLG	-0.473314	7.46023	0.00824622	0.0382611
ENSG00000260836	AC245033.1	AC245033.1	-0.473857	8.49899	0.00411114	0.0222229
ENSG00000204642	HLA-F	HLA-F	-0.475103	9.71894	0.00296823	0.017135
ENSG00000180964	TCEAL8	TCEAL8	-0.476065	6.59682	0.0090963	0.0411709
ENSG00000168286	THAP11	THAP11	-0.476875	6.72707	0.00726257	0.0348753
ENSG00000196954	CASP4	CASP4	-0.479498	8.50903	0.00169523	0.0108361
ENSG00000166501	PRKCB	PRKCB	-0.479914	6.64044	0.00849552	0.0390936
ENSG00000140391	TSPAN3	TSPAN3	-0.482083	6.03245	0.0102285	0.0449863
ENSG00000149182	ARFGAP2	ARFGAP2	-0.483364	6.86059	0.00465046	0.0246117
ENSG00000114126	TFDP2	TFDP2	-0.486023	6.91165	0.00791163	0.0372563
ENSG00000160714	UBE2Q1	UBE2Q1	-0.486529	6.40509	0.0094746	0.0424621
ENSG00000160208	RRP1B	RRP1B	-0.486773	6.84566	0.00633746	0.0315055
ENSG00000003056	M6PR	M6PR	-0.489616	7.73704	0.00342806	0.0191271
ENSG00000260669	AL096870.3	AL096870.3	-0.490554	6.85259	0.00745277	0.0356756
ENSG00000121058	COIL	COIL	-0.490932	6.32752	0.00706574	0.0340462
ENSG00000140612	SEC11A	SEC11A	-0.492343	8.78948	0.00115736	0.00785164
ENSG00000188976	NOC2L	NOC2L	-0.492805	6.42615	0.00666379	0.0325919
ENSG00000136710	CCDC115	CCDC115	-0.4929	6.68609	0.0053019	0.0274838
ENSG00000139697	SBNO1	SBNO1	-0.493959	6.98044	0.00482987	0.0254281
ENSG00000184281	TSSC4	TSSC4	-0.49398	6.7459	0.00603383	0.030269
ENSG00000277150	F8A3	F8A3	-0.496307	5.67563	0.0100669	0.044469
ENSG00000157637	SLC38A10	SLC38A10	-0.496351	6.11338	0.00877636	0.0399614
ENSG00000258644	SYNJ2BP-COX16	SYNJ2BP-COX16	-0.500914	6.49931	0.00641306	0.0317771
ENSG00000180992	MRPL14	MRPL14	-0.501825	7.34586	0.00452156	0.0240555
ENSG00000160226	CFAP410	CFAP410	-0.50207	5.43887	0.0110711	0.0478591
ENSG00000172081	MOB3A	MOB3A	-0.503701	6.13023	0.00797795	0.0374405
ENSG00000280143	AP000892.3	AP000892.3	-0.506396	5.41245	0.00958841	0.0428546
ENSG00000160710	ADAR	ADAR	-0.5077	7.3982	0.00992874	0.0440465
ENSG00000124299	PEPD	PEPD	-0.509259	6.58396	0.00651223	0.0321111
ENSG00000161203	AP2M1	AP2M1	-0.509424	7.9422	0.00894104	0.040559
ENSG00000087266	SH3BP2	SH3BP2	-0.509938	6.26336	0.010444	0.0457036
ENSG00000140367	UBE2Q2	UBE2Q2	-0.511746	6.65519	0.00475603	0.0250829
ENSG00000163219	ARHGAP25	ARHGAP25	-0.512668	6.78922	0.00947505	0.0424621
ENSG00000181610	MRPS23	MRPS23	-0.513553	6.38177	0.00862852	0.0395555
ENSG00000136950	ARPC5L	ARPC5L	-0.513917	8.77188	0.00212385	0.0130508
ENSG00000111358	GTF2H3	GTF2H3	-0.515275	5.49009	0.00908588	0.0411545
ENSG00000179632	MAF1	MAF1	-0.515584	7.7868	0.00576519	0.0292357
ENSG00000117748	RPA2	RPA2	-0.516821	7.30429	0.00217523	0.0132724
ENSG00000168394	TAP1	TAP1	-0.517066	7.70223	0.00126404	0.00846183
ENSG00000159111	MRPL10	MRPL10	-0.517193	6.88275	0.00456288	0.024254
ENSG00000108883	EFTUD2	EFTUD2	-0.51768	5.19362	0.0108416	0.0470347
ENSG00000160410	SHKBP1	SHKBP1	-0.518529	6.64467	0.00631111	0.0314139
ENSG00000167113	COQ4	COQ4	-0.521689	5.932	0.00947702	0.0424621
ENSG00000181396	OGFOD3	OGFOD3	-0.521983	5.51495	0.0108673	0.0471123
ENSG00000068120	COASY	COASY	-0.524073	5.4721	0.00835544	0.0385954
ENSG00000166340	TPP1	TPP1	-0.525186	5.2015	0.0103469	0.0453751
ENSG00000171475	WIPF2	WIPF2	-0.52545	5.56077	0.00804243	0.0375677
ENSG00000169223	LMAN2	LMAN2	-0.528096	8.19564	0.000835215	0.00609576
ENSG00000143222	UFC1	UFC1	-0.528832	8.79681	0.000969878	0.00685584
ENSG00000172466	ZNF24	ZNF24	-0.529125	6.87389	0.0036079	0.0198565
ENSG00000116649	SRM	SRM	-0.529465	7.46317	0.00171647	0.0109238
ENSG00000196459	TRAPPC2	TRAPPC2	-0.529875	6.72492	0.00581335	0.0294307
ENSG00000112237	CCNC	CCNC	-0.530983	6.46651	0.00291714	0.0169144
ENSG00000132467	UTP3	UTP3	-0.531171	6.32988	0.00827351	0.0383337
ENSG00000130429	ARPC1B	ARPC1B	-0.531961	10.0934	0.000884362	0.00637014
ENSG00000162236	STX5	STX5	-0.532514	6.00209	0.0112671	0.0484552
ENSG00000127314	RAP1B	RAP1B	-0.533644	9.59087	0.00116076	0.00785734
ENSG00000164483	SAMD3	SAMD3	-0.534378	8.19424	0.000462431	0.0036424
ENSG00000120992	LYPLA1	LYPLA1	-0.536374	6.4777	0.00383685	0.0209455
ENSG00000187838	PLSCR3	PLSCR3	-0.536846	5.32451	0.00666741	0.0325919
ENSG00000167380	ZNF226	ZNF226	-0.53722	5.23312	0.0107298	0.0467005
ENSG00000125991	ERGIC3	ERGIC3	-0.537224	6.46871	0.00842075	0.0388084
ENSG00000186566	GPATCH8	GPATCH8	-0.538731	7.5675	0.000936207	0.00667226
ENSG00000214706	IFRD2	IFRD2	-0.538788	5.93735	0.0057528	0.0291973
ENSG00000196684	HSH2D	HSH2D	-0.538846	5.86169	0.00677146	0.0329606
ENSG00000147439	BIN3	BIN3	-0.538943	5.36263	0.00989022	0.0439445
ENSG00000198624	CCDC69	CCDC69	-0.539326	6.8833	0.00914746	0.04131
ENSG00000214262	ANKRD36BP1	ANKRD36BP1	-0.539846	7.36856	0.00608252	0.0304377
ENSG00000261884	AC040162.1	AC040162.1	-0.540105	7.23277	0.00605553	0.0303277
ENSG00000047056	WDR37	WDR37	-0.541504	5.61353	0.00689193	0.0333862
ENSG00000101474	APMAP	APMAP	-0.541792	8.2514	0.0049366	0.0259646
ENSG00000117713	ARID1A	ARID1A	-0.542183	7.04036	0.00524419	0.0272545
ENSG00000089053	ANAPC5	ANAPC5	-0.542698	7.49073	0.00379592	0.020797
ENSG00000177239	MAN1B1	MAN1B1	-0.542964	5.87778	0.00422001	0.02269
ENSG00000204237	OXLD1	OXLD1	-0.543445	6.78609	0.0018375	0.0115846
ENSG00000087191	PSMC5	PSMC5	-0.543491	8.34201	0.00102801	0.00717375
ENSG00000168899	VAMP5	VAMP5	-0.544091	7.95773	0.00113108	0.00774267
ENSG00000213347	MXD3	MXD3	-0.544164	5.90718	0.00831646	0.0384739
ENSG00000196781	TLE1	TLE1	-0.544871	6.43209	0.00998324	0.044164
ENSG00000146414	SHPRH	SHPRH	-0.544956	5.98339	0.00802831	0.0375677
ENSG00000175220	ARHGAP1	ARHGAP1	-0.546035	5.58625	0.00659398	0.0324088
ENSG00000136280	CCM2	CCM2	-0.547291	7.38105	0.00271173	0.0160142
ENSG00000160058	BSDC1	BSDC1	-0.548623	6.06136	0.00615872	0.0307936
ENSG00000157873	TNFRSF14	TNFRSF14	-0.548857	7.03354	0.00185372	0.0116748
ENSG00000104964	TLE5	TLE5	-0.549403	10.1517	0.000376735	0.00307523
ENSG00000161179	YDJC	YDJC	-0.550249	6.48902	0.00223813	0.0136287
ENSG00000005844	ITGAL	ITGAL	-0.550384	7.79176	0.00306677	0.0175471
ENSG00000255730	AC011462.1	AC011462.1	-0.55092	4.85518	0.00759655	0.036221
ENSG00000178952	TUFM	TUFM	-0.551465	8.24941	0.00129084	0.00859377
ENSG00000112992	NNT	NNT	-0.552733	5.57773	0.009853	0.0438433
ENSG00000177311	ZBTB38	ZBTB38	-0.553722	7.74607	0.00463092	0.0245297
ENSG00000103174	NAGPA	NAGPA	-0.554024	5.29351	0.00699313	0.0338224
ENSG00000100523	DDHD1	DDHD1	-0.554216	6.79946	0.00197833	0.0122811
ENSG00000122678	POLM	POLM	-0.554392	5.15533	0.00791396	0.0372563
ENSG00000133114	GPALPP1	GPALPP1	-0.555112	5.33233	0.00945603	0.0424621
ENSG00000048544	MRPS10	MRPS10	-0.555926	6.16809	0.00343274	0.0191356
ENSG00000156697	UTP14A	UTP14A	-0.559274	5.24915	0.00717823	0.0344976
ENSG00000156990	RPUSD3	RPUSD3	-0.559583	5.39251	0.00526288	0.0273282
ENSG00000225071	AC004552.1	AC004552.1	-0.560189	4.19234	0.0108177	0.0469645
ENSG00000163684	RPP14	RPP14	-0.560332	4.9221	0.0063633	0.031608
ENSG00000279369	AC046185.3	AC046185.3	-0.561407	6.20806	0.00213846	0.0130876
ENSG00000237550	AC243919.1	AC243919.1	-0.561632	10.7782	0.00324041	0.0182983
ENSG00000149311	ATM	ATM	-0.561703	8.17007	0.000611439	0.00465644
ENSG00000267680	ZNF224	ZNF224	-0.562119	5.6945	0.00387383	0.0211284
ENSG00000064012	CASP8	CASP8	-0.562374	7.66496	0.000882943	0.00636748
ENSG00000125863	MKKS	MKKS	-0.563686	5.8387	0.00303993	0.01741
ENSG00000109906	ZBTB16	ZBTB16	-0.563901	6.99703	0.0100798	0.0444934
ENSG00000165512	ZNF22	ZNF22	-0.56409	6.94833	0.00299333	0.0172245
ENSG00000271109	AC008555.4	AC008555.4	-0.564109	6.09366	0.00549539	0.0282693
ENSG00000109572	CLCN3	CLCN3	-0.564965	5.55	0.00965524	0.0430898
ENSG00000158526	TSR2	TSR2	-0.567049	7.0519	0.00116685	0.00788079
ENSG00000144579	CTDSP1	CTDSP1	-0.568404	7.30317	0.0106313	0.0463875
ENSG00000081059	TCF7	TCF7	-0.568826	6.60047	0.00256685	0.0153379
ENSG00000053371	AKR7A2	AKR7A2	-0.568881	7.03984	0.00155131	0.0100413
ENSG00000113851	CRBN	CRBN	-0.568972	7.06689	0.00129957	0.00863299
ENSG00000163050	COQ8A	COQ8A	-0.56941	5.30532	0.010561	0.0461473
ENSG00000073584	SMARCE1	SMARCE1	-0.569439	7.25606	0.0009934	0.00697334
ENSG00000237190	CDKN2AIPNL	CDKN2AIPNL	-0.570452	5.85636	0.00775904	0.0367358
ENSG00000227191	TRGC2	TRGC2	-0.570606	8.73689	0.00198649	0.0123191
ENSG00000229124	VIM-AS1	VIM-AS1	-0.571156	5.79514	0.0101451	0.0446842
ENSG00000169239	CA5B	CA5B	-0.571297	5.96451	0.00529913	0.0274838
ENSG00000117362	APH1A	APH1A	-0.571622	7.11868	0.00189528	0.0118748
ENSG00000268575	AL031282.2	AL031282.2	-0.571962	5.90429	0.00599377	0.0301814
ENSG00000064607	SUGP2	SUGP2	-0.573571	6.57504	0.00150601	0.00977938
ENSG00000284292	AC004922.1	AC004922.1	-0.573856	5.85316	0.00457339	0.0242886
ENSG00000177981	ASB8	ASB8	-0.5754	6.27753	0.0020189	0.0124867
ENSG00000188994	ZNF292	ZNF292	-0.576326	7.61928	0.000800757	0.00593715
ENSG00000100938	GMPR2	GMPR2	-0.576701	6.13789	0.00307768	0.017593
ENSG00000162676	GFI1	GFI1	-0.577162	5.44239	0.00969126	0.0432062
ENSG00000130741	EIF2S3	EIF2S3	-0.578129	8.23228	0.000389321	0.00316095
ENSG00000198695	MT-ND6	MT-ND6	-0.578643	7.87448	0.00741472	0.0355216
ENSG00000243678	NME2	NME2	-0.579382	9.13407	0.00168024	0.0107724
ENSG00000186222	BLOC1S4	BLOC1S4	-0.580836	7.28381	0.000758185	0.00564913
ENSG00000164073	MFSD8	MFSD8	-0.581128	5.10947	0.00602655	0.0302575
ENSG00000234741	GAS5	GAS5	-0.581272	9.97714	0.00169553	0.0108361
ENSG00000100242	SUN2	SUN2	-0.581383	8.35249	0.00127351	0.0085158
ENSG00000286112	AL441992.2	AL441992.2	-0.581673	4.76036	0.00566165	0.0288796
ENSG00000089639	GMIP	GMIP	-0.582665	5.84861	0.00461717	0.0244783
ENSG00000109062	SLC9A3R1	SLC9A3R1	-0.582741	7.62536	0.00296932	0.017135
ENSG00000169919	GUSB	GUSB	-0.583149	6.21888	0.00296225	0.0171268
ENSG00000100650	SRSF5	SRSF5	-0.583503	10.0642	0.00109877	0.0075814
ENSG00000273344	PAXIP1-AS1	PAXIP1-AS1	-0.58469	5.56258	0.00537163	0.0277977
ENSG00000011052	NME1-NME2	NME1-NME2	-0.585119	9.13572	0.00156096	0.0100822
ENSG00000197471	SPN	SPN	-0.586258	6.57401	0.00174867	0.0110822
ENSG00000139192	TAPBPL	TAPBPL	-0.587554	5.83291	0.00561741	0.0287993
ENSG00000154370	TRIM11	TRIM11	-0.587555	5.48743	0.00876971	0.0399614
ENSG00000091947	TMEM101	TMEM101	-0.588079	5.83085	0.00297527	0.0171531
ENSG00000177830	CHID1	CHID1	-0.589273	5.70484	0.00868598	0.0397588
ENSG00000149547	EI24	EI24	-0.590648	5.60458	0.0102755	0.0451275
ENSG00000092871	RFFL	RFFL	-0.590876	5.36399	0.00588927	0.0297654
ENSG00000099203	TMED1	TMED1	-0.591164	5.49035	0.0066613	0.0325919
ENSG00000255819	KLRC4-KLRK1	KLRC4-KLRK1	-0.591232	7.96495	0.000652254	0.00491419
ENSG00000151657	KIN	KIN	-0.592553	6.60602	0.00292384	0.0169371
ENSG00000172500	FIBP	FIBP	-0.59261	7.09141	0.000826753	0.00604856
ENSG00000105516	DBP	DBP	-0.592798	5.91021	0.00598274	0.0301624
ENSG00000042753	AP2S1	AP2S1	-0.594179	7.80127	0.000322492	0.00270322
ENSG00000136319	TTC5	TTC5	-0.59419	5.19456	0.00640141	0.0317453
ENSG00000103653	CSK	CSK	-0.594632	7.73721	0.000494842	0.00385265
ENSG00000136717	BIN1	BIN1	-0.595116	8.36403	0.00037645	0.00307523
ENSG00000205572	SERF1B	SERF1B	-0.597893	5.05982	0.00397666	0.0216115
ENSG00000104408	EIF3E	EIF3E	-0.598649	9.41008	0.000412161	0.00331533
ENSG00000134452	FBH1	FBH1	-0.599587	5.42832	0.00300573	0.0172794
ENSG00000262919	CCNQ	CCNQ	-0.601267	6.07827	0.00152343	0.00987137
ENSG00000215908	CROCCP2	CROCCP2	-0.601888	5.7059	0.00761984	0.0363035
ENSG00000271092	TMEM56-RWDD3	TMEM56-RWDD3	-0.602588	5.62691	0.00871954	0.0398523
ENSG00000127616	SMARCA4	SMARCA4	-0.602902	5.58255	0.00240983	0.0144996
ENSG00000130764	LRRC47	LRRC47	-0.603504	5.60789	0.00308721	0.0175977
ENSG00000136279	DBNL	DBNL	-0.604586	7.52667	0.000922385	0.0066048
ENSG00000104853	CLPTM1	CLPTM1	-0.604736	5.84022	0.00253359	0.015184
ENSG00000141627	DYM	DYM	-0.606115	6.09332	0.00115555	0.00784818
ENSG00000245556	SCAMP1-AS1	SCAMP1-AS1	-0.606205	4.8404	0.00874595	0.0399429
ENSG00000148824	MTG1	MTG1	-0.606278	5.67018	0.00273295	0.016077
ENSG00000233429	HOTAIRM1	HOTAIRM1	-0.60651	6.39967	0.00189408	0.0118748
ENSG00000107872	FBXL15	FBXL15	-0.606811	6.7915	0.00088939	0.00639875
ENSG00000111801	BTN3A3	BTN3A3	-0.606982	6.1448	0.00412023	0.0222486
ENSG00000117091	CD48	CD48	-0.607235	10.6612	0.000942176	0.00669896
ENSG00000180011	ZADH2	ZADH2	-0.607342	5.65005	0.00303572	0.0174023
ENSG00000168522	FNTA	FNTA	-0.608142	6.7405	0.000954121	0.00676812
ENSG00000072786	STK10	STK10	-0.608567	7.52324	0.000419957	0.00336426
ENSG00000124570	SERPINB6	SERPINB6	-0.608783	7.23702	0.00199985	0.0123893
ENSG00000135736	CCDC102A	CCDC102A	-0.609007	5.455	0.00565957	0.0288796
ENSG00000186470	BTN3A2	BTN3A2	-0.609044	8.03725	0.000143033	0.00138357
ENSG00000157216	SSBP3	SSBP3	-0.609791	5.75308	0.0047148	0.0248871
ENSG00000128284	APOL3	APOL3	-0.610239	6.32381	0.00115489	0.00784818
ENSG00000136381	IREB2	IREB2	-0.610557	5.84692	0.00427566	0.0229283
ENSG00000124942	AHNAK	AHNAK	-0.612635	7.93892	0.00110659	0.00761804
ENSG00000125817	CENPB	CENPB	-0.615029	6.47426	0.00183168	0.011572
ENSG00000152234	ATP5F1A	ATP5F1A	-0.615839	8.20476	0.000371872	0.00304784
ENSG00000165688	PMPCA	PMPCA	-0.616322	5.91115	0.00145345	0.00948273
ENSG00000103254	FAM173A	FAM173A	-0.616884	7.74786	0.00380913	0.0208317
ENSG00000263276	AC020978.7	AC020978.7	-0.61692	4.93209	0.00302108	0.0173475
ENSG00000188811	NHLRC3	NHLRC3	-0.617449	6.17598	0.000813692	0.00597946
ENSG00000064490	RFXANK	RFXANK	-0.617906	6.30628	0.00686378	0.0333031
ENSG00000110047	EHD1	EHD1	-0.618105	7.30066	0.000713567	0.00534294
ENSG00000270170	NCBP2AS2	NCBP2AS2	-0.619468	7.48476	0.000540044	0.00415656
ENSG00000258674	AC011448.1	AC011448.1	-0.619614	6.74447	0.00467932	0.0247429
ENSG00000277998	AC107075.1	AC107075.1	-0.61988	5.38619	0.00666673	0.0325919
ENSG00000112576	CCND3	CCND3	-0.620403	9.27155	0.00117717	0.00794161
ENSG00000067992	PDK3	PDK3	-0.620758	5.49956	0.00392975	0.0213757
ENSG00000114388	NPRL2	NPRL2	-0.621834	5.78123	0.00383108	0.0209329
ENSG00000166046	TCP11L2	TCP11L2	-0.625421	4.93528	0.00224546	0.0136549
ENSG00000204463	BAG6	BAG6	-0.630178	5.95917	0.00270666	0.0159999
ENSG00000122741	DCAF10	DCAF10	-0.631423	5.2595	0.0052047	0.0270957
ENSG00000185624	P4HB	P4HB	-0.63166	8.51502	0.000346782	0.00288114
ENSG00000136444	RSAD1	RSAD1	-0.631795	5.6763	0.00700731	0.033864
ENSG00000148334	PTGES2	PTGES2	-0.631815	5.91224	0.00996761	0.0441589
ENSG00000204209	DAXX	DAXX	-0.632168	6.20385	0.000589364	0.00451895
ENSG00000224870	MRPL20-AS1	MRPL20-AS1	-0.632599	5.32448	0.00451227	0.0240483
ENSG00000113048	MRPS27	MRPS27	-0.632668	5.52388	0.00183362	0.0115722
ENSG00000091409	ITGA6	ITGA6	-0.632895	6.00282	0.00138866	0.00916457
ENSG00000172058	SERF1A	SERF1A	-0.633083	5.04061	0.0024096	0.0144996
ENSG00000164944	VIRMA	VIRMA	-0.635138	5.76116	0.00131051	0.00869613
ENSG00000255641	AC068775.1	AC068775.1	-0.637055	6.97609	0.00213719	0.0130876
ENSG00000196227	FAM217B	FAM217B	-0.638881	5.85675	0.00288865	0.0167652
ENSG00000175463	TBC1D10C	TBC1D10C	-0.639019	8.553	9.80157e-05	0.000994089
ENSG00000140406	TLNRD1	TLNRD1	-0.639544	5.54654	0.00877376	0.0399614
ENSG00000204371	EHMT2	EHMT2	-0.639864	5.7086	0.00402154	0.0218163
ENSG00000181035	SLC25A42	SLC25A42	-0.642686	5.33144	0.00144453	0.00944084
ENSG00000009790	TRAF3IP3	TRAF3IP3	-0.643036	8.39637	9.33509e-05	0.000953154
ENSG00000128335	APOL2	APOL2	-0.644132	6.20736	0.000711352	0.00533294
ENSG00000137207	YIPF3	YIPF3	-0.644185	6.33429	0.00255566	0.015286
ENSG00000170291	ELP5	ELP5	-0.646151	6.05567	0.00214974	0.0131301
ENSG00000231925	TAPBP	TAPBP	-0.647115	8.68465	0.000341971	0.00284506
ENSG00000186001	LRCH3	LRCH3	-0.647962	5.50385	0.00268141	0.0158971
ENSG00000101940	WDR13	WDR13	-0.649457	5.67966	0.00201969	0.0124867
ENSG00000167775	CD320	CD320	-0.649685	7.6129	0.00355032	0.0196109
ENSG00000138744	NAAA	NAAA	-0.650443	6.01272	0.00106111	0.00737183
ENSG00000088888	MAVS	MAVS	-0.650955	5.37556	0.0011807	0.00795662
ENSG00000213809	KLRK1	KLRK1	-0.652033	7.94303	0.00112899	0.00773708
ENSG00000182108	DEXI	DEXI	-0.652901	5.92028	0.00818132	0.0380519
ENSG00000100106	TRIOBP	TRIOBP	-0.653165	5.35623	0.00284762	0.0165747
ENSG00000099308	MAST3	MAST3	-0.653966	5.26491	0.00192086	0.0119979
ENSG00000005448	WDR54	WDR54	-0.654503	6.23749	0.000560083	0.00429988
ENSG00000108389	MTMR4	MTMR4	-0.65482	5.01943	0.0014728	0.00959457
ENSG00000122435	TRMT13	TRMT13	-0.655643	5.67623	0.000919313	0.00659059
ENSG00000132680	KHDC4	KHDC4	-0.656035	5.45689	0.00374917	0.020578
ENSG00000121680	PEX16	PEX16	-0.65655	6.65406	0.00328819	0.0184827
ENSG00000266412	NCOA4	NCOA4	-0.656594	6.07158	0.00114202	0.00777621
ENSG00000130511	SSBP4	SSBP4	-0.656628	8.11841	0.00112497	0.00772155
ENSG00000108604	SMARCD2	SMARCD2	-0.658104	5.50975	0.00404382	0.0219176
ENSG00000005194	CIAPIN1	CIAPIN1	-0.658264	5.27366	0.00748467	0.0358001
ENSG00000100083	GGA1	GGA1	-0.658832	6.62497	0.00226465	0.0137489
ENSG00000003402	CFLAR	CFLAR	-0.659377	8.80829	4.55497e-05	0.000510644
ENSG00000262481	TMEM256-PLSCR3	TMEM256-PLSCR3	-0.659466	5.30824	0.000985614	0.0069428
ENSG00000169021	UQCRFS1	UQCRFS1	-0.659843	7.65816	0.000837481	0.00610496
ENSG00000115459	ELMOD3	ELMOD3	-0.660287	4.86961	0.00143467	0.00939028
ENSG00000099795	NDUFB7	NDUFB7	-0.66142	8.74965	0.000120441	0.00118777
ENSG00000088298	EDEM2	EDEM2	-0.661526	5.72624	0.00170832	0.0108834
ENSG00000080189	SLC35C2	SLC35C2	-0.661792	6.2557	0.000449824	0.00355232
ENSG00000101347	SAMHD1	SAMHD1	-0.66236	7.8833	5.17608e-05	0.000568713
ENSG00000077235	GTF3C1	GTF3C1	-0.66298	6.55063	0.0108972	0.0471745
ENSG00000215472	RPL17-C18orf32	RPL17-C18orf32	-0.66387	11.9635	4.52183e-05	0.000509259
ENSG00000162639	HENMT1	HENMT1	-0.667079	6.24159	0.00792603	0.0372563
ENSG00000115234	SNX17	SNX17	-0.667317	7.24646	0.000210076	0.00191595
ENSG00000142546	NOSIP	NOSIP	-0.668083	7.94771	8.48052e-05	0.000876224
ENSG00000147604	RPL7	RPL7	-0.669676	11.6566	8.46461e-05	0.000876073
ENSG00000134905	CARS2	CARS2	-0.669856	5.88744	0.000842714	0.00613573
ENSG00000117543	DPH5	DPH5	-0.670092	6.01673	0.00102345	0.00715639
ENSG00000119718	EIF2B2	EIF2B2	-0.671389	5.46247	0.00224692	0.0136549
ENSG00000166888	STAT6	STAT6	-0.671543	5.68467	0.000933874	0.0066695
ENSG00000126522	ASL	ASL	-0.671856	5.33996	0.00190397	0.0119077
ENSG00000130811	EIF3G	EIF3G	-0.671948	9.63106	0.00036687	0.00301092
ENSG00000114626	ABTB1	ABTB1	-0.674175	6.58773	0.000803365	0.00594921
ENSG00000255154	HTD2	HTD2	-0.676015	4.71544	0.00113746	0.00776738
ENSG00000112561	TFEB	TFEB	-0.676254	5.67467	0.00125728	0.00842587
ENSG00000107331	ABCA2	ABCA2	-0.677228	5.66056	0.00257016	0.0153425
ENSG00000143554	SLC27A3	SLC27A3	-0.677612	5.39898	0.000878459	0.00635782
ENSG00000174748	RPL15	RPL15	-0.679097	12.3112	2.4562e-05	0.000297342
ENSG00000178537	SLC25A20	SLC25A20	-0.679108	5.28115	0.000934719	0.0066695
ENSG00000163683	SMIM14	SMIM14	-0.679797	6.03014	0.000541509	0.00416255
ENSG00000115085	ZAP70	ZAP70	-0.68028	7.78924	2.56439e-05	0.000308592
ENSG00000155463	OXA1L	OXA1L	-0.681255	6.22013	0.000200954	0.00184106
ENSG00000132405	TBC1D14	TBC1D14	-0.681707	5.51431	0.00437281	0.0233666
ENSG00000131018	SYNE1	SYNE1	-0.683575	8.12851	1.62947e-05	0.000209379
ENSG00000116918	TSNAX	TSNAX	-0.684535	6.17278	0.000913051	0.00655344
ENSG00000116906	GNPAT	GNPAT	-0.685445	6.29402	0.000212423	0.00193155
ENSG00000172336	POP7	POP7	-0.686981	5.96864	0.000279888	0.00242157
ENSG00000012822	CALCOCO1	CALCOCO1	-0.687377	6.10301	0.000811396	0.00597946
ENSG00000166750	SLFN5	SLFN5	-0.68854	8.22441	0.00106721	0.00740572
ENSG00000089289	IGBP1	IGBP1	-0.689798	7.62228	0.00140089	0.00923438
ENSG00000145736	GTF2H2	GTF2H2	-0.693476	5.68718	0.00142607	0.00936051
ENSG00000107521	HPS1	HPS1	-0.693613	6.05973	0.00140229	0.00923438
ENSG00000213699	SLC35F6	SLC35F6	-0.693642	4.63093	0.00271784	0.0160192
ENSG00000160688	FLAD1	FLAD1	-0.694142	5.46428	0.000610307	0.00465599
ENSG00000089159	PXN	PXN	-0.694818	6.39862	0.000309405	0.00261298
ENSG00000158019	BABAM2	BABAM2	-0.696961	6.00931	0.000528731	0.00407984
ENSG00000108848	LUC7L3	LUC7L3	-0.697068	8.70188	1.14209e-05	0.000152572
ENSG00000180448	AC004151.1	AC004151.1	-0.699008	8.01425	6.30274e-05	0.000678972
ENSG00000179588	ZFPM1	ZFPM1	-0.699445	6.82965	0.000458138	0.00361327
ENSG00000149357	LAMTOR1	LAMTOR1	-0.701133	7.12514	0.000124837	0.00122317
ENSG00000114098	ARMC8	ARMC8	-0.703538	5.70241	0.00236328	0.0142522
ENSG00000176986	SEC24C	SEC24C	-0.703869	5.27848	0.00116079	0.00785734
ENSG00000175634	RPS6KB2	RPS6KB2	-0.710694	6.68635	7.13122e-05	0.000757458
ENSG00000115275	MOGS	MOGS	-0.711906	5.51511	0.000943267	0.00669896
ENSG00000224032	EPB41L4A-AS1	EPB41L4A-AS1	-0.713174	7.74438	0.00059355	0.00454531
ENSG00000129353	SLC44A2	SLC44A2	-0.71373	6.08306	0.000294511	0.00253723
ENSG00000167094	TTC16	TTC16	-0.717397	5.69707	0.000256739	0.00225018
ENSG00000142327	RNPEPL1	RNPEPL1	-0.720697	7.91912	1.07033e-05	0.00014555
ENSG00000163946	TASOR	TASOR	-0.721738	6.62073	0.000335216	0.0027927
ENSG00000167658	EEF2	EEF2	-0.722631	10.0755	1.09982e-06	1.86847e-05
ENSG00000223705	NSUN5P1	NSUN5P1	-0.724306	5.80981	0.00133686	0.00885156
ENSG00000257529	RPL36A-HNRNPH2	RPL36A-HNRNPH2	-0.725455	5.47035	0.00494389	0.0259646
ENSG00000169871	TRIM56	TRIM56	-0.728574	6.75053	0.000277209	0.0024087
ENSG00000141506	PIK3R5	PIK3R5	-0.731462	6.01605	0.00073813	0.00551325
ENSG00000170962	PDGFD	PDGFD	-0.732601	5.36138	0.00122075	0.00820824
ENSG00000106560	GIMAP2	GIMAP2	-0.733158	6.8085	0.000165829	0.00157845
ENSG00000140853	NLRC5	NLRC5	-0.734973	6.41911	0.000364285	0.00299781
ENSG00000127334	DYRK2	DYRK2	-0.735933	6.86933	4.53122e-05	0.000509259
ENSG00000157036	EXOG	EXOG	-0.736499	5.38174	0.00030846	0.00260922
ENSG00000215021	PHB2	PHB2	-0.736665	8.06092	3.87905e-06	5.89635e-05
ENSG00000249437	NAIP	NAIP	-0.737196	5.09376	0.00134323	0.00888406
ENSG00000104490	NCALD	NCALD	-0.74123	5.5968	0.000363507	0.00299781
ENSG00000132424	PNISR	PNISR	-0.741447	9.65807	1.27928e-05	0.000168304
ENSG00000070423	AC004156.1	AC004156.1	-0.741886	7.64783	1.22089e-05	0.000161675
ENSG00000105221	AKT2	AKT2	-0.742252	6.1374	0.000167201	0.00158556
ENSG00000073849	ST6GAL1	ST6GAL1	-0.742889	5.98878	0.000382456	0.00311773
ENSG00000102178	UBL4A	UBL4A	-0.742899	5.95541	0.000215	0.00194914
ENSG00000168887	C2orf68	C2orf68	-0.745465	5.26625	0.000621924	0.00472086
ENSG00000072736	NFATC3	NFATC3	-0.746216	6.55577	9.19435e-05	0.000940366
ENSG00000196968	FUT11	FUT11	-0.747365	5.42858	0.00108526	0.00750527
ENSG00000118705	RPN2	RPN2	-0.747442	7.68358	5.87435e-05	0.00063964
ENSG00000039650	PNKP	PNKP	-0.749609	6.26377	0.000194691	0.00179181
ENSG00000136936	XPA	XPA	-0.750686	6.94791	1.63622e-05	0.00020966
ENSG00000148700	ADD3	ADD3	-0.752105	7.78299	2.87018e-05	0.000343346
ENSG00000104763	ASAH1	ASAH1	-0.756258	6.84454	0.000171702	0.00161505
ENSG00000196646	ZNF136	ZNF136	-0.756723	5.27488	0.000428504	0.00340613
ENSG00000163508	EOMES	EOMES	-0.756764	6.34627	0.00353226	0.0195289
ENSG00000007520	TSR3	TSR3	-0.757354	7.05621	4.58033e-05	0.000511597
ENSG00000153395	LPCAT1	LPCAT1	-0.757415	6.34737	0.000251956	0.00222433
ENSG00000279738	AL022311.1	AL022311.1	-0.758833	5.53346	0.00032908	0.00275293
ENSG00000069998	HDHD5	HDHD5	-0.760223	5.23173	0.000991156	0.00696565
ENSG00000211460	TSN	TSN	-0.761179	6.04207	9.76916e-05	0.000992462
ENSG00000163389	POGLUT1	POGLUT1	-0.761247	5.38229	0.000255581	0.00224327
ENSG00000133818	RRAS2	RRAS2	-0.76325	6.60029	0.000426545	0.00339759
ENSG00000110719	TCIRG1	TCIRG1	-0.764827	6.8713	0.000100108	0.00101193
ENSG00000129355	CDKN2D	CDKN2D	-0.766663	7.94282	2.06819e-05	0.00025547
ENSG00000067182	TNFRSF1A	TNFRSF1A	-0.766715	5.57707	0.000223027	0.00201588
ENSG00000105676	ARMC6	ARMC6	-0.767187	4.57635	0.000400479	0.00322993
ENSG00000113719	ERGIC1	ERGIC1	-0.767834	6.01059	7.61227e-05	0.000798762
ENSG00000164062	APEH	APEH	-0.768761	5.91168	0.000120032	0.00118566
ENSG00000162777	DENND2D	DENND2D	-0.769688	7.68721	0.000121648	0.00119772
ENSG00000103811	CTSH	CTSH	-0.772031	5.49193	0.0039911	0.0216706
ENSG00000111679	PTPN6	PTPN6	-0.772871	6.92063	1.18174e-05	0.000156833
ENSG00000214022	REPIN1	REPIN1	-0.773731	4.87916	0.000882241	0.00636748
ENSG00000162739	SLAMF6	SLAMF6	-0.774403	6.51933	0.00109475	0.00756226
ENSG00000205810	KLRC3	KLRC3	-0.775061	6.57136	0.000869156	0.00630554
ENSG00000158864	NDUFS2	NDUFS2	-0.775829	7.08902	1.70482e-05	0.000215812
ENSG00000159593	NAE1	NAE1	-0.778861	6.65757	1.65215e-05	0.00021007
ENSG00000171148	TADA3	TADA3	-0.77955	7.16943	0.000957829	0.00678649
ENSG00000259956	RBM15B	RBM15B	-0.782901	5.71469	8.98685e-05	0.000922254
ENSG00000116685	KIAA2013	KIAA2013	-0.783885	6.04863	9.4468e-05	0.000961323
ENSG00000175567	UCP2	UCP2	-0.787477	8.86683	4.44332e-06	6.61895e-05
ENSG00000096080	MRPS18A	MRPS18A	-0.787623	5.35894	0.000421548	0.00336849
ENSG00000181991	MRPS11	MRPS11	-0.78905	6.39104	0.000169641	0.00160511
ENSG00000124702	KLHDC3	KLHDC3	-0.793441	5.94607	0.000174165	0.00163113
ENSG00000159069	FBXW5	FBXW5	-0.793509	7.6033	1.90143e-05	0.000237777
ENSG00000068028	RASSF1	RASSF1	-0.796059	8.08712	0.000153137	0.00147191
ENSG00000160211	G6PD	G6PD	-0.80059	6.34737	0.00206526	0.0127294
ENSG00000117280	RAB29	RAB29	-0.800922	7.26155	7.62983e-06	0.000108882
ENSG00000244398	AC116533.1	AC116533.1	-0.802314	7.29387	0.000174531	0.00163113
ENSG00000134255	CEPT1	CEPT1	-0.802395	4.87072	0.000124838	0.00122317
ENSG00000105373	NOP53	NOP53	-0.804135	10.5305	1.6456e-05	0.000209675
ENSG00000157978	LDLRAP1	LDLRAP1	-0.805257	6.32232	4.95788e-05	0.000551735
ENSG00000156136	DCK	DCK	-0.807932	6.79208	0.000639551	0.00483048
ENSG00000169740	ZNF32	ZNF32	-0.808148	6.73439	2.60339e-05	0.000312665
ENSG00000160613	PCSK7	PCSK7	-0.809775	7.85165	2.27806e-06	3.6359e-05
ENSG00000172543	CTSW	CTSW	-0.809863	10.1788	0.00249919	0.0149927
ENSG00000197540	GZMM	GZMM	-0.813397	9.8018	0.000420463	0.00336426
ENSG00000035403	VCL	VCL	-0.816612	5.77776	0.000103878	0.00104481
ENSG00000111540	AC034102.1	AC034102.1	-0.821134	5.45312	0.00128101	0.00855655
ENSG00000168824	NSG1	NSG1	-0.822539	5.2858	0.000321514	0.00270081
ENSG00000141295	SCRN2	SCRN2	-0.824101	5.70289	0.000463895	0.00364919
ENSG00000160856	FCRL3	FCRL3	-0.824185	5.01161	0.000146827	0.001418
ENSG00000105053	VRK3	VRK3	-0.828137	5.84232	4.30082e-05	0.000489389
ENSG00000169217	CD2BP2	CD2BP2	-0.828299	6.73864	1.09663e-05	0.000148131
ENSG00000204387	SNHG32	SNHG32	-0.830888	7.09181	0.000159518	0.0015284
ENSG00000122223	CD244	CD244	-0.831379	5.70687	0.00229788	0.013895
ENSG00000121716	PILRB	PILRB	-0.831564	5.80574	0.000184933	0.00171502
ENSG00000105202	FBL	FBL	-0.832835	7.79699	3.23897e-06	5.03702e-05
ENSG00000197858	GPAA1	GPAA1	-0.833986	6.44542	0.000220271	0.00199395
ENSG00000172531	PPP1CA	PPP1CA	-0.834035	8.15165	1.68947e-06	2.7619e-05
ENSG00000104518	GSDMD	GSDMD	-0.840344	7.33628	0.00011075	0.00110295
ENSG00000254087	LYN	LYN	-0.84152	5.45078	0.000722886	0.00540605
ENSG00000122122	SASH3	SASH3	-0.846602	6.23383	8.27845e-05	0.00085974
ENSG00000272282	LINC02084	LINC02084	-0.854422	6.34785	2.13816e-05	0.000263575
ENSG00000136286	MYO1G	MYO1G	-0.855896	7.89695	1.64253e-05	0.000209675
ENSG00000257341	AL928654.3	AL928654.3	-0.858401	7.62285	0.000637858	0.00482864
ENSG00000142634	EFHD2	EFHD2	-0.86184	9.05073	5.67519e-07	1.03988e-05
ENSG00000160255	ITGB2	ITGB2	-0.862105	9.41302	1.63856e-05	0.00020966
ENSG00000069702	TGFBR3	TGFBR3	-0.863033	6.30903	1.4284e-05	0.000185112
ENSG00000127947	PTPN12	PTPN12	-0.864788	6.4059	1.60895e-05	0.000207182
ENSG00000151702	FLI1	FLI1	-0.866206	6.56162	8.18633e-05	0.000851631
ENSG00000149091	DGKZ	DGKZ	-0.868721	8.00578	2.22006e-07	4.50323e-06
ENSG00000100060	MFNG	MFNG	-0.875652	7.29888	1.08827e-06	1.85404e-05
ENSG00000117281	CD160	CD160	-0.876576	6.54965	0.000237593	0.00210848
ENSG00000139641	ESYT1	ESYT1	-0.878063	6.48139	1.07461e-05	0.000145806
ENSG00000244038	DDOST	DDOST	-0.878555	8.23875	1.54066e-07	3.23326e-06
ENSG00000162894	FCMR	FCMR	-0.878694	7.21374	6.20481e-06	9.00291e-05
ENSG00000256028	AC026362.1	AC026362.1	-0.880416	7.40868	6.01547e-07	1.09127e-05
ENSG00000196924	FLNA	FLNA	-0.882258	8.72894	5.0504e-07	9.33863e-06
ENSG00000149294	NCAM1	NCAM1	-0.882434	5.6729	0.00287824	0.0167208
ENSG00000237248	LINC00987	LINC00987	-0.887588	5.092	3.58779e-05	0.00041606
ENSG00000102901	CENPT	CENPT	-0.894088	5.28474	0.00035357	0.00292551
ENSG00000188986	NELFB	NELFB	-0.896685	6.21224	1.0575e-05	0.000144128
ENSG00000213203	GIMAP1	GIMAP1	-0.897047	7.35783	2.01134e-06	3.25301e-05
ENSG00000164880	INTS1	INTS1	-0.89752	5.50656	2.38288e-05	0.000289623
ENSG00000068831	RASGRP2	RASGRP2	-0.897714	7.58686	3.67041e-07	6.9349e-06
ENSG00000129667	RHBDF2	RHBDF2	-0.902856	5.60419	1.67806e-05	0.000212917
ENSG00000265681	RPL17	RPL17	-0.903541	12.5643	1.37661e-05	0.000179939
ENSG00000167851	CD300A	CD300A	-0.906177	6.88496	7.70363e-07	1.35821e-05
ENSG00000106133	NSUN5P2	NSUN5P2	-0.914546	5.4459	2.26694e-05	0.000277758
ENSG00000175066	GK5	GK5	-0.914641	6.06333	4.38363e-06	6.54846e-05
ENSG00000160219	GAB3	GAB3	-0.914882	6.3641	7.91748e-06	0.000112458
ENSG00000100027	YPEL1	YPEL1	-0.921069	7.0036	1.64302e-06	2.69323e-05
ENSG00000116667	C1orf21	C1orf21	-0.921808	7.32408	0.000504912	0.00391598
ENSG00000101439	CST3	CST3	-0.925193	5.46643	2.94788e-05	0.000350566
ENSG00000137642	SORL1	SORL1	-0.926604	6.97431	1.13642e-05	0.00015215
ENSG00000186654	PRR5	PRR5	-0.927247	6.52089	4.86342e-06	7.1768e-05
ENSG00000288066	AC097448.1	AC097448.1	-0.928251	5.33298	0.000207213	0.00189555
ENSG00000121064	SCPEP1	SCPEP1	-0.93154	5.46814	0.000813957	0.00597946
ENSG00000125910	S1PR4	S1PR4	-0.932172	7.8065	2.43976e-07	4.88355e-06
ENSG00000170989	S1PR1	S1PR1	-0.933961	5.53085	1.27435e-05	0.000168021
ENSG00000112419	PHACTR2	PHACTR2	-0.935469	7.44194	4.20506e-05	0.000480296
ENSG00000100129	EIF3L	EIF3L	-0.937484	8.50253	8.36546e-09	2.21557e-07
ENSG00000145220	LYAR	LYAR	-0.940864	9.3611	7.03701e-09	1.88015e-07
ENSG00000196187	TMEM63A	TMEM63A	-0.945484	5.44059	0.00010028	0.00101198
ENSG00000129968	ABHD17A	ABHD17A	-0.951866	9.38853	2.44928e-07	4.88647e-06
ENSG00000251229	AL645924.2	AL645924.2	-0.956636	6.01162	0.000364195	0.00299781
ENSG00000110934	BIN2	BIN2	-0.958979	8.65388	1.39834e-06	2.34281e-05
ENSG00000131370	SH3BP5	SH3BP5	-0.961761	7.84529	2.02931e-07	4.15803e-06
ENSG00000172794	RAB37	RAB37	-0.963541	6.23175	0.000962744	0.00681335
ENSG00000213445	SIPA1	SIPA1	-0.963849	7.82205	1.34696e-07	2.88669e-06
ENSG00000108622	ICAM2	ICAM2	-0.973705	7.05804	3.82583e-06	5.83006e-05
ENSG00000197713	RPE	RPE	-0.975293	5.6968	2.47999e-06	3.92719e-05
ENSG00000100055	CYTH4	CYTH4	-0.975473	6.67023	6.54998e-05	0.000703109
ENSG00000107679	PLEKHA1	PLEKHA1	-0.976977	7.17034	1.47298e-07	3.10195e-06
ENSG00000187688	TRPV2	TRPV2	-0.979291	6.37015	8.46885e-06	0.000118897
ENSG00000007264	MATK	MATK	-0.983461	9.1067	1.16547e-06	1.97446e-05
ENSG00000119820	YIPF4	YIPF4	-0.990283	6.99844	3.77734e-07	7.09275e-06
ENSG00000177370	TIMM22	TIMM22	-0.9927	5.93739	9.99174e-07	1.72159e-05
ENSG00000101224	CDC25B	CDC25B	-0.998262	6.6453	7.96139e-06	0.000112817
ENSG00000125457	MIF4GD	MIF4GD	-1.00493	6.19056	3.34521e-07	6.36009e-06
ENSG00000076662	ICAM3	ICAM3	-1.00733	9.44608	2.30123e-08	5.6278e-07
ENSG00000140398	NEIL1	NEIL1	-1.02042	5.04675	8.89819e-06	0.000123495
ENSG00000150687	PRSS23	PRSS23	-1.02172	4.68968	3.48211e-06	5.34658e-05
ENSG00000152219	ARL14EP	ARL14EP	-1.02611	6.83914	5.84353e-07	1.0675e-05
ENSG00000074966	TXK	TXK	-1.03094	6.85967	2.32346e-05	0.000284109
ENSG00000139626	ITGB7	ITGB7	-1.03545	7.16542	3.49272e-05	0.000407372
ENSG00000021762	OSBPL5	OSBPL5	-1.03644	5.43003	1.88934e-06	3.07207e-05
ENSG00000160404	TOR2A	TOR2A	-1.04283	5.4427	7.42597e-06	0.000106474
ENSG00000122026	RPL21	RPL21	-1.04443	13.3012	1.42884e-07	3.03005e-06
ENSG00000100353	EIF3D	EIF3D	-1.05013	8.48148	2.28446e-09	6.59775e-08
ENSG00000117676	RPS6KA1	RPS6KA1	-1.05116	6.89621	2.03022e-08	5.0054e-07
ENSG00000211689	TRGC1	TRGC1	-1.05167	7.89806	1.37731e-06	2.31396e-05
ENSG00000111913	RIPOR2	RIPOR2	-1.05555	8.09869	1.54955e-09	4.56216e-08
ENSG00000134539	KLRD1	KLRD1	-1.05629	10.4709	5.18843e-06	7.63782e-05
ENSG00000198055	GRK6	GRK6	-1.05787	7.8144	8.42437e-08	1.88538e-06
ENSG00000232442	MHENCR	MHENCR	-1.06239	6.06781	2.62133e-07	5.11201e-06
ENSG00000245164	LINC00861	LINC00861	-1.06409	6.67039	2.43519e-08	5.90778e-07
ENSG00000213676	ATF6B	ATF6B	-1.06679	6.18083	3.41416e-06	5.26893e-05
ENSG00000048028	USP28	USP28	-1.06865	6.61389	1.54775e-07	3.23694e-06
ENSG00000204482	LST1	LST1	-1.07099	6.07374	4.26534e-05	0.000486264
ENSG00000136161	RCBTB2	RCBTB2	-1.08119	6.10204	1.29554e-06	2.18262e-05
ENSG00000197321	SVIL	SVIL	-1.08265	5.64521	7.01508e-06	0.000101301
ENSG00000162241	SLC25A45	SLC25A45	-1.0881	6.20875	4.7276e-08	1.11568e-06
ENSG00000159674	SPON2	SPON2	-1.09169	7.93731	6.3354e-08	1.45711e-06
ENSG00000142173	COL6A2	COL6A2	-1.0946	5.65045	2.83606e-06	4.45613e-05
ENSG00000255508	AP002990.1	AP002990.1	-1.10405	10.5416	2.45233e-09	7.01574e-08
ENSG00000066294	CD84	CD84	-1.10517	7.15535	5.94488e-07	1.08275e-05
ENSG00000149823	VPS51	VPS51	-1.11507	7.51008	5.01137e-10	1.55725e-08
ENSG00000133561	GIMAP6	GIMAP6	-1.1258	6.54998	3.24793e-07	6.2141e-06
ENSG00000111653	ING4	ING4	-1.13009	6.27873	2.63395e-08	6.3142e-07
ENSG00000254772	EEF1G	EEF1G	-1.13293	10.5933	1.29064e-09	3.85602e-08
ENSG00000164631	ZNF12	ZNF12	-1.14103	5.29446	8.11468e-07	1.41831e-05
ENSG00000180644	PRF1	PRF1	-1.16275	9.33696	1.59644e-12	6.77093e-11
ENSG00000148019	CEP78	CEP78	-1.16363	6.77154	2.73334e-09	7.74659e-08
ENSG00000187713	TMEM203	TMEM203	-1.17201	6.83292	1.44619e-06	2.40966e-05
ENSG00000142765	SYTL1	SYTL1	-1.17766	7.89239	1.44452e-08	3.65042e-07
ENSG00000224505	AC138150.1	AC138150.1	-1.1884	5.24991	4.5171e-08	1.07016e-06
ENSG00000145214	DGKQ	DGKQ	-1.20283	5.36456	9.56558e-08	2.09441e-06
ENSG00000111796	KLRB1	KLRB1	-1.24077	10.7996	9.19671e-06	0.000127347
ENSG00000064201	TSPAN32	TSPAN32	-1.25379	6.65634	1.62288e-08	4.06725e-07
ENSG00000204475	NCR3	NCR3	-1.27937	7.75747	1.82553e-05	0.000228757
ENSG00000167664	TMIGD2	TMIGD2	-1.29286	6.52783	7.00713e-07	1.24264e-05
ENSG00000075234	TTC38	TTC38	-1.30715	6.69421	1.78855e-08	4.44571e-07
ENSG00000168229	PTGDR	PTGDR	-1.31715	7.76418	4.63361e-06	6.85435e-05
ENSG00000142347	MYO1F	MYO1F	-1.35565	7.73959	1.89571e-10	6.05129e-09
ENSG00000203747	FCGR3A	FCGR3A	-1.3642	7.93461	4.23675e-06	6.36037e-05
ENSG00000128294	TPST2	TPST2	-1.38585	7.78274	3.87552e-12	1.567e-10
ENSG00000261208	AL365475.1	AL365475.1	-1.40409	5.44622	2.48611e-08	6.00728e-07
ENSG00000205336	ADGRG1	ADGRG1	-1.41336	6.30026	2.92137e-07	5.67889e-06
ENSG00000158869	FCER1G	FCER1G	-1.44828	6.9562	1.70284e-10	5.46441e-09
ENSG00000169896	ITGAM	ITGAM	-1.47535	5.8269	7.90171e-10	2.40823e-08
ENSG00000172460	PRSS30P	PRSS30P	-1.49468	5.74965	8.39176e-11	2.76609e-09
ENSG00000175029	CTBP2	CTBP2	-1.52727	5.24605	4.00058e-11	1.36312e-09
ENSG00000126822	PLEKHG3	PLEKHG3	-1.60453	5.86442	2.24988e-11	8.12233e-10
ENSG00000137441	FGFBP2	FGFBP2	-1.63449	8.96395	4.83708e-09	1.32746e-07
ENSG00000143110	C1orf162	C1orf162	-1.63834	7.27581	9.87558e-13	4.34025e-11
ENSG00000145287	PLAC8	PLAC8	-1.65954	8.92647	4.97546e-13	2.28607e-11
ENSG00000180739	S1PR5	S1PR5	-1.66694	6.49123	2.53779e-10	8.05849e-09
ENSG00000187118	CMC1	CMC1	-1.66989	10.2211	4.47651e-12	1.78619e-10
ENSG00000171604	CXXC5	CXXC5	-1.69073	6.67977	4.40473e-11	1.48415e-09
ENSG00000115956	PLEK	PLEK	-1.69707	7.71833	5.55442e-13	2.5329e-11
ENSG00000188404	SELL	SELL	-1.75254	7.96923	1.96272e-14	1.0921e-12
ENSG00000139187	KLRG1	KLRG1	-1.79143	9.09017	7.86154e-16	5.2978e-14
ENSG00000000938	FGR	FGR	-1.79961	6.28811	6.59073e-16	4.49133e-14
ENSG00000211829	TRDC	TRDC	-1.83361	8.48771	1.44312e-10	4.6805e-09
ENSG00000245105	A2M-AS1	A2M-AS1	-1.8968	7.56341	3.70002e-21	4.00726e-19
ENSG00000196542	SPTSSB	SPTSSB	-1.96702	6.0748	6.7691e-14	3.44997e-12
ENSG00000150045	KLRF1	KLRF1	-2.09767	8.48681	2.55751e-15	1.61576e-13
ENSG00000168329	CX3CR1	CX3CR1	-2.11647	6.06308	9.68628e-14	4.85515e-12
ENSG00000183734	ASCL2	ASCL2	-2.12741	5.87877	4.88835e-19	4.63248e-17

## Sheet: Monocytes
Significantly differentially expressed Genes in Monocyte cluster Periphery vs PBMC
GeneId	Symbol	GeneName	log2FC	log2A	P.Value	adj.P.Val
ENSG00000204388	HSPA1B	HSPA1B	8.67504	10.3748	3.53996e-110	2.78807e-106
ENSG00000163734	CXCL3	CXCL3	6.53878	9.83489	1.10168e-46	4.56675e-44
ENSG00000202198	RF00100	RF00100	6.32841	9.26458	1.20027e-29	1.75062e-27
ENSG00000283293	RN7SK	RN7SK	5.73469	7.67951	1.17212e-58	9.23165e-56
ENSG00000106211	HSPB1	HSPB1	5.7224	9.61028	1.30508e-25	1.53416e-23
ENSG00000081041	CXCL2	CXCL2	5.30128	10.6652	3.58948e-46	1.28504e-43
ENSG00000140379	BCL2A1	BCL2A1	5.18008	10.7049	2.66961e-66	3.5043e-63
ENSG00000123358	NR4A1	NR4A1	5.17828	8.99971	6.23485e-48	3.06911e-45
ENSG00000158050	DUSP2	DUSP2	5.14124	8.67542	4.86016e-34	9.56966e-32
ENSG00000120694	HSPH1	HSPH1	4.88205	8.95745	4.32702e-36	9.73703e-34
ENSG00000095794	CREM	CREM	4.78125	7.17056	2.62587e-75	6.89378e-72
ENSG00000130844	ZNF331	ZNF331	4.37204	7.87221	9.04946e-69	1.42547e-65
ENSG00000099985	OSM	OSM	4.34175	6.72833	4.2519e-13	2.14666e-11
ENSG00000011422	PLAUR	PLAUR	4.26646	9.48971	3.8175e-27	4.77248e-25
ENSG00000145414	NAF1	NAF1	4.1346	6.14637	1.82325e-16	1.12187e-14
ENSG00000251230	MIR3945HG	MIR3945HG	4.12636	6.64933	8.29764e-50	4.66802e-47
ENSG00000073756	PTGS2	PTGS2	4.11272	7.89743	1.3266e-51	8.03717e-49
ENSG00000184588	PDE4B	PDE4B	4.11238	8.04142	5.07922e-42	1.53861e-39
ENSG00000112149	CD83	CD83	4.09547	9.1564	5.15718e-48	2.70786e-45
ENSG00000178726	THBD	THBD	4.0849	6.79951	2.82499e-46	1.05951e-43
ENSG00000163874	ZC3H12A	ZC3H12A	3.943	6.31755	2.5083e-89	9.87769e-86
ENSG00000123975	CKS2	CKS2	3.94068	6.65957	1.31216e-24	1.47637e-22
ENSG00000121797	CCRL2	CCRL2	3.90754	6.71231	9.38803e-22	8.59769e-20
ENSG00000169508	GPR183	GPR183	3.88304	9.00588	6.79461e-14	3.64043e-12
ENSG00000112715	VEGFA	VEGFA	3.81834	7.70397	2.3012e-46	9.06211e-44
ENSG00000023445	BIRC3	BIRC3	3.7353	8.00211	7.75255e-36	1.65024e-33
ENSG00000178381	ZFAND2A	ZFAND2A	3.61429	7.60278	1.39013e-30	2.18974e-28
ENSG00000138670	RASGEF1B	RASGEF1B	3.60475	7.7913	1.06517e-33	1.99745e-31
ENSG00000112096	SOD2	SOD2	3.57431	11.594	5.22013e-47	2.2841e-44
ENSG00000112137	PHACTR1	PHACTR1	3.56655	6.88193	1.13652e-64	1.27875e-61
ENSG00000115541	HSPE1	HSPE1	3.56371	9.62931	8.66498e-30	1.28765e-27
ENSG00000118985	ELL2	ELL2	3.56314	7.29986	1.27638e-62	1.11697e-59
ENSG00000161835	GRASP	GRASP	3.50526	7.82608	1.36751e-15	7.8617e-14
ENSG00000253320	AZIN1-AS1	AZIN1-AS1	3.47914	6.2899	7.03407e-75	1.38501e-71
ENSG00000136689	IL1RN	IL1RN	3.43271	7.34627	1.2211e-38	3.43479e-36
ENSG00000162772	ATF3	ATF3	3.4009	7.46624	8.18952e-37	2.01564e-34
ENSG00000117036	ETV3	ETV3	3.39956	6.34878	1.86494e-25	2.16004e-23
ENSG00000148926	ADM	ADM	3.39649	7.07957	2.87581e-27	3.65321e-25
ENSG00000274213	AC015912.3	AC015912.3	3.35324	7.077	1.57376e-64	1.54937e-61
ENSG00000090339	ICAM1	ICAM1	3.32205	7.63226	5.23495e-39	1.52705e-36
ENSG00000154710	RABGEF1	RABGEF1	3.31593	6.11208	1.13001e-23	1.2027e-21
ENSG00000113070	HBEGF	HBEGF	3.27958	7.27366	3.90398e-23	3.8819e-21
ENSG00000135047	CTSL	CTSL	3.26349	6.97491	3.85934e-16	2.30274e-14
ENSG00000124762	CDKN1A	CDKN1A	3.17192	8.38161	2.75082e-24	3.05147e-22
ENSG00000185022	MAFF	MAFF	3.15456	7.45492	2.01592e-18	1.4304e-16
ENSG00000124882	EREG	EREG	3.15327	10.6827	1.73878e-36	4.14988e-34
ENSG00000167604	NFKBID	NFKBID	3.14417	6.61835	1.76259e-47	8.16597e-45
ENSG00000144381	HSPD1	HSPD1	3.1402	9.79232	2.34816e-16	1.42263e-14
ENSG00000176788	BASP1	BASP1	3.1205	8.79634	9.04793e-28	1.18769e-25
ENSG00000108179	PPIF	PPIF	3.07709	8.81322	6.12616e-21	5.28484e-19
ENSG00000170542	SERPINB9	SERPINB9	3.06861	8.32017	1.63295e-56	1.12706e-53
ENSG00000198814	GK	GK	3.06766	7.33789	1.97519e-18	1.41424e-16
ENSG00000273319	AC058791.1	AC058791.1	2.9999	5.57369	3.17238e-25	3.62111e-23
ENSG00000165997	ARL5B	ARL5B	2.97824	6.93938	1.7172e-56	1.12706e-53
ENSG00000186480	INSIG1	INSIG1	2.96634	7.1777	2.28855e-22	2.17164e-20
ENSG00000110047	EHD1	EHD1	2.94984	7.61793	6.10886e-24	6.59087e-22
ENSG00000173451	THAP2	THAP2	2.92679	4.59779	1.87039e-36	4.3327e-34
ENSG00000124145	SDC4	SDC4	2.90442	5.77965	1.59942e-28	2.21001e-26
ENSG00000103569	AQP9	AQP9	2.8902	7.33124	9.53847e-16	5.56482e-14
ENSG00000132510	KDM6B	KDM6B	2.88086	9.08328	3.27529e-30	5.05808e-28
ENSG00000105849	TWISTNB	TWISTNB	2.86962	7.48634	3.82527e-17	2.53175e-15
ENSG00000169895	SYAP1	SYAP1	2.86446	8.65792	4.03311e-44	1.32353e-41
ENSG00000136603	SKIL	SKIL	2.85546	7.36988	1.05216e-30	1.69119e-28
ENSG00000134107	BHLHE40	BHLHE40	2.80711	6.65803	2.9894e-19	2.18005e-17
ENSG00000196352	CD55	CD55	2.75133	9.15942	7.3505e-31	1.20609e-28
ENSG00000151247	EIF4E	EIF4E	2.73772	7.81986	7.12749e-27	8.63632e-25
ENSG00000175197	DDIT3	DDIT3	2.71396	6.70142	6.14397e-35	1.24077e-32
ENSG00000141543	EIF4A3	EIF4A3	2.71056	8.17921	2.49785e-22	2.34203e-20
ENSG00000113811	SELENOK	SELENOK	2.6473	9.09132	4.0587e-30	6.14736e-28
ENSG00000113448	PDE4D	PDE4D	2.63721	5.18495	1.87818e-31	3.21577e-29
ENSG00000101665	SMAD7	SMAD7	2.62705	5.50741	2.23625e-23	2.31746e-21
ENSG00000164169	PRMT9	PRMT9	2.62514	6.29648	1.76247e-28	2.39331e-26
ENSG00000198805	PNP	PNP	2.61779	6.99076	1.22873e-08	3.57101e-07
ENSG00000133657	ATP13A3	ATP13A3	2.60479	7.35025	6.17326e-21	5.28484e-19
ENSG00000248323	LUCAT1	LUCAT1	2.58369	5.70363	6.13658e-16	3.63397e-14
ENSG00000110172	CHORDC1	CHORDC1	2.5437	7.05973	5.71958e-17	3.69241e-15
ENSG00000134480	CCNH	CCNH	2.53535	7.16337	1.83348e-37	4.65822e-35
ENSG00000116044	NFE2L2	NFE2L2	2.52217	6.3903	9.97487e-18	6.89141e-16
ENSG00000155307	SAMSN1	SAMSN1	2.51384	9.73413	1.12159e-45	3.84073e-43
ENSG00000069399	BCL3	BCL3	2.50975	6.0803	4.73004e-43	1.49015e-40
ENSG00000086061	DNAJA1	DNAJA1	2.49465	9.57765	5.9556e-17	3.81352e-15
ENSG00000260708	AL118516.1	AL118516.1	2.48285	6.4831	1.77433e-19	1.35676e-17
ENSG00000232956	SNHG15	SNHG15	2.47456	7.45528	2.10503e-19	1.54946e-17
ENSG00000284461	AC027644.4	AC027644.4	2.46791	3.98677	5.17657e-36	1.13252e-33
ENSG00000229644	NAMPTP1	NAMPTP1	2.44345	4.39645	1.48485e-27	1.91716e-25
ENSG00000183484	GPR132	GPR132	2.43312	5.61491	9.83859e-34	1.88997e-31
ENSG00000131979	GCH1	GCH1	2.42577	6.97896	2.59747e-16	1.56166e-14
ENSG00000197019	SERTAD1	SERTAD1	2.42121	7.54236	3.63041e-20	2.91766e-18
ENSG00000109320	NFKB1	NFKB1	2.41523	8.01668	8.47223e-17	5.29582e-15
ENSG00000125735	TNFSF14	TNFSF14	2.39727	6.15322	0.000919295	0.00751855
ENSG00000055483	AC022966.1	AC022966.1	2.38844	5.63783	1.52112e-12	7.00605e-11
ENSG00000130340	SNX9	SNX9	2.36719	5.98827	2.18558e-35	4.5299e-33
ENSG00000176170	SPHK1	SPHK1	2.35475	5.0591	1.79018e-07	4.22138e-06
ENSG00000107968	MAP3K8	MAP3K8	2.34903	8.59428	1.42686e-21	1.27704e-19
ENSG00000100221	JOSD1	JOSD1	2.34768	6.61085	9.41704e-29	1.32444e-26
ENSG00000100292	HMOX1	HMOX1	2.31813	9.74256	1.13491e-06	2.26292e-05
ENSG00000115956	PLEK	PLEK	2.31597	9.69756	2.55417e-23	2.61255e-21
ENSG00000126262	FFAR2	FFAR2	2.3097	4.81704	1.37105e-06	2.67951e-05
ENSG00000255398	HCAR3	HCAR3	2.29827	6.72472	1.92768e-19	1.44594e-17
ENSG00000059728	MXD1	MXD1	2.29642	7.85891	2.41116e-38	6.54837e-36
ENSG00000162711	NLRP3	NLRP3	2.28949	9.19765	3.89759e-33	7.13894e-31
ENSG00000160271	RALGDS	RALGDS	2.28929	5.081	1.1534e-26	1.37639e-24
ENSG00000198355	PIM3	PIM3	2.28733	7.99718	3.94301e-23	3.8819e-21
ENSG00000269821	KCNQ1OT1	KCNQ1OT1	2.27264	6.45137	5.47026e-10	1.94071e-08
ENSG00000198879	SFMBT2	SFMBT2	2.27187	5.18936	6.24564e-27	7.68605e-25
ENSG00000144655	CSRNP1	CSRNP1	2.2644	7.31413	6.49627e-14	3.50443e-12
ENSG00000075426	FOSL2	FOSL2	2.25829	8.04494	7.81132e-38	2.05073e-35
ENSG00000120738	EGR1	EGR1	2.25738	7.54221	1.04607e-15	6.05798e-14
ENSG00000152409	JMY	JMY	2.25109	5.68403	6.01326e-17	3.81939e-15
ENSG00000008294	SPAG9	SPAG9	2.23552	8.00938	2.77335e-17	1.86691e-15
ENSG00000116752	BCAS2	BCAS2	2.20973	7.11867	8.47359e-20	6.6738e-18
ENSG00000162924	REL	REL	2.20709	9.62461	1.2142e-17	8.31571e-16
ENSG00000158882	TOMM40L	TOMM40L	2.20134	5.07688	2.04936e-32	3.66836e-30
ENSG00000145979	TBC1D7	TBC1D7	2.19594	4.78146	6.31158e-23	6.13704e-21
ENSG00000285816	AP000944.2	AP000944.2	2.18373	4.03515	9.11845e-12	3.98983e-10
ENSG00000184557	SOCS3	SOCS3	2.17411	7.81533	1.45604e-19	1.13542e-17
ENSG00000166579	NDEL1	NDEL1	2.17401	4.85963	8.59502e-17	5.33027e-15
ENSG00000177426	TGIF1	TGIF1	2.16024	6.81409	1.48075e-31	2.59164e-29
ENSG00000069849	ATP1B3	ATP1B3	2.15716	9.34282	7.75695e-23	7.45045e-21
ENSG00000149798	CDC42EP2	CDC42EP2	2.15645	3.79757	5.59428e-09	1.71442e-07
ENSG00000166471	TMEM41B	TMEM41B	2.15265	5.53728	2.89042e-13	1.47824e-11
ENSG00000225331	LINC01678	LINC01678	2.14857	5.05996	1.08775e-21	9.8473e-20
ENSG00000172939	OXSR1	OXSR1	2.13761	6.81343	1.57898e-19	1.21922e-17
ENSG00000077150	NFKB2	NFKB2	2.12188	6.41199	2.43337e-28	3.24834e-26
ENSG00000116161	CACYBP	CACYBP	2.11917	7.73863	8.83976e-12	3.8895e-10
ENSG00000111817	DSE	DSE	2.10036	6.60967	1.49672e-07	3.57217e-06
ENSG00000182782	HCAR2	HCAR2	2.07873	6.33864	9.4048e-11	3.72222e-09
ENSG00000139112	GABARAPL1	GABARAPL1	2.07663	8.55769	3.38407e-17	2.25873e-15
ENSG00000131669	NINJ1	NINJ1	2.06638	8.58919	4.09894e-20	3.26093e-18
ENSG00000146232	NFKBIE	NFKBIE	2.06336	5.59703	2.30779e-31	3.86727e-29
ENSG00000255112	CHMP1B	CHMP1B	2.04439	7.72115	1.49906e-21	1.32658e-19
ENSG00000173372	C1QA	C1QA	2.03165	7.60423	4.49317e-12	2.02218e-10
ENSG00000176845	METRNL	METRNL	2.02839	8.89269	1.26151e-20	1.06835e-18
ENSG00000139832	RAB20	RAB20	2.02591	6.49099	2.18492e-18	1.53647e-16
ENSG00000065989	PDE4A	PDE4A	2.01989	5.86314	8.9101e-16	5.23701e-14
ENSG00000070961	ATP2B1	ATP2B1	2.01629	9.12573	9.15248e-13	4.36878e-11
ENSG00000105835	NAMPT	NAMPT	1.98759	10.5166	8.26427e-13	3.99321e-11
ENSG00000185947	ZNF267	ZNF267	1.98642	7.16159	4.95141e-17	3.24978e-15
ENSG00000251022	THAP9-AS1	THAP9-AS1	1.98328	4.06708	8.69835e-13	4.17733e-11
ENSG00000153395	LPCAT1	LPCAT1	1.98248	5.74893	6.34529e-12	2.82348e-10
ENSG00000023608	SNAPC1	SNAPC1	1.979	4.76243	2.56018e-14	1.43007e-12
ENSG00000141682	PMAIP1	PMAIP1	1.9548	7.26089	9.91011e-14	5.16901e-12
ENSG00000164898	FMC1	FMC1	1.95236	4.10707	8.78766e-11	3.51328e-09
ENSG00000146457	WTAP	WTAP	1.95085	7.51905	4.07164e-18	2.8379e-16
ENSG00000059804	SLC2A3	SLC2A3	1.94155	8.81055	9.13493e-29	1.30812e-26
ENSG00000280800	FP671120.4	FP671120.4	1.93502	10.0531	1.01304e-12	4.72111e-11
ENSG00000152484	USP12	USP12	1.9326	6.30855	3.73889e-23	3.77532e-21
ENSG00000178607	ERN1	ERN1	1.92721	5.53667	4.29332e-21	3.75713e-19
ENSG00000146676	PURB	PURB	1.91905	7.16918	1.51757e-20	1.25815e-18
ENSG00000150347	ARID5B	ARID5B	1.90869	5.31597	8.39617e-11	3.37389e-09
ENSG00000072274	TFRC	TFRC	1.88939	5.26573	7.72018e-22	7.15343e-20
ENSG00000104312	RIPK2	RIPK2	1.88868	7.20193	1.41478e-12	6.55458e-11
ENSG00000130164	LDLR	LDLR	1.88493	4.90258	3.90133e-11	1.63441e-09
ENSG00000164543	STK17A	STK17A	1.88339	5.31852	1.83167e-19	1.38714e-17
ENSG00000172115	CYCS	CYCS	1.84899	8.88029	5.392e-24	5.89825e-22
ENSG00000069956	MAPK6	MAPK6	1.84512	6.5324	2.32835e-08	6.28016e-07
ENSG00000245904	AC025164.1	AC025164.1	1.84437	5.14077	1.31054e-10	5.01059e-09
ENSG00000196428	TSC22D2	TSC22D2	1.84053	6.15267	1.4918e-23	1.56659e-21
ENSG00000092820	EZR	EZR	1.82618	8.30709	1.43554e-20	1.2028e-18
ENSG00000070495	JMJD6	JMJD6	1.82408	5.82091	2.26932e-20	1.86179e-18
ENSG00000186834	HEXIM1	HEXIM1	1.79733	6.12649	3.57888e-08	9.39574e-07
ENSG00000102760	RGCC	RGCC	1.77838	6.74503	6.52063e-08	1.65133e-06
ENSG00000196843	ARID5A	ARID5A	1.76055	6.20827	1.28776e-14	7.24454e-13
ENSG00000116717	GADD45A	GADD45A	1.75166	6.38675	1.64655e-08	4.69863e-07
ENSG00000269220	LINC00528	LINC00528	1.7432	5.36759	2.27888e-16	1.39135e-14
ENSG00000104419	NDRG1	NDRG1	1.73234	6.43057	1.03871e-11	4.51984e-10
ENSG00000067334	DNTTIP2	DNTTIP2	1.71973	7.80127	9.71897e-13	4.58363e-11
ENSG00000153922	CHD1	CHD1	1.71756	8.54411	3.43693e-20	2.79064e-18
ENSG00000132661	NXT1	NXT1	1.71088	6.00684	6.3348e-17	3.99143e-15
ENSG00000182957	SPATA13	SPATA13	1.70757	4.88262	1.58209e-17	1.07419e-15
ENSG00000110079	MS4A4A	MS4A4A	1.68909	5.65669	5.32185e-17	3.46404e-15
ENSG00000140678	ITGAX	ITGAX	1.6828	7.76233	4.70206e-08	1.2182e-06
ENSG00000113369	ARRDC3	ARRDC3	1.68187	6.47323	5.23722e-09	1.61758e-07
ENSG00000179630	LACC1	LACC1	1.68061	4.27087	1.61561e-10	6.11759e-09
ENSG00000272196	HIST2H2AA4	HIST2H2AA4	1.67556	7.68137	4.29791e-14	2.36716e-12
ENSG00000203812	HIST2H2AA3	HIST2H2AA3	1.67556	7.68137	4.29791e-14	2.36716e-12
ENSG00000164687	FABP5	FABP5	1.6739	6.83682	1.39699e-08	4.01559e-07
ENSG00000204569	PPP1R10	PPP1R10	1.67097	7.48206	6.7394e-10	2.35909e-08
ENSG00000006652	IFRD1	IFRD1	1.67052	6.36026	3.43577e-19	2.48258e-17
ENSG00000188486	H2AFX	H2AFX	1.64417	5.09539	8.47888e-06	0.000136008
ENSG00000157933	SKI	SKI	1.64313	5.25376	5.17192e-11	2.1439e-09
ENSG00000169155	ZBTB43	ZBTB43	1.63846	7.19939	2.57536e-08	6.89915e-07
ENSG00000086619	ERO1B	ERO1B	1.63093	5.0617	3.44487e-07	7.68607e-06
ENSG00000139132	FGD4	FGD4	1.62866	7.56983	2.5352e-11	1.07931e-09
ENSG00000165006	UBAP1	UBAP1	1.62093	6.15439	5.23983e-10	1.86737e-08
ENSG00000186594	MIR22HG	MIR22HG	1.61127	7.03541	2.4482e-10	8.96837e-09
ENSG00000178623	GPR35	GPR35	1.60543	5.29014	2.06365e-13	1.06929e-11
ENSG00000062194	GPBP1	GPBP1	1.59737	8.1284	2.37029e-09	7.68248e-08
ENSG00000147872	PLIN2	PLIN2	1.59287	8.83764	2.51403e-09	8.11495e-08
ENSG00000174373	RALGAPA1	RALGAPA1	1.59194	4.97539	3.67121e-05	0.000490076
ENSG00000197405	C5AR1	C5AR1	1.58946	10.0544	7.6489e-13	3.74179e-11
ENSG00000189067	LITAF	LITAF	1.58693	7.70249	4.50271e-15	2.55132e-13
ENSG00000151327	FAM177A1	FAM177A1	1.58147	6.6859	4.90152e-08	1.26572e-06
ENSG00000129226	CD68	CD68	1.57992	5.58075	3.62246e-11	1.5257e-09
ENSG00000197021	CXorf40B	CXorf40B	1.57054	3.97875	3.9542e-08	1.03466e-06
ENSG00000100644	HIF1A	HIF1A	1.55274	6.61766	1.51268e-09	5.04824e-08
ENSG00000255198	SNHG9	SNHG9	1.55242	4.97167	2.33967e-08	6.28916e-07
ENSG00000044574	HSPA5	HSPA5	1.55221	9.24567	2.20218e-06	4.09066e-05
ENSG00000168209	DDIT4	DDIT4	1.55035	8.97947	5.08357e-07	1.08799e-05
ENSG00000107554	DNMBP	DNMBP	1.54801	4.97905	6.52928e-13	3.21404e-11
ENSG00000102393	GLA	GLA	1.54122	6.35774	9.9246e-13	4.65275e-11
ENSG00000260805	AC092803.2	AC092803.2	1.53274	4.61098	1.3487e-09	4.53946e-08
ENSG00000100219	XBP1	XBP1	1.53173	7.72387	6.9566e-14	3.70204e-12
ENSG00000188483	IER5L	IER5L	1.52909	5.9525	9.21086e-07	1.87454e-05
ENSG00000116679	IVNS1ABP	IVNS1ABP	1.52675	7.70532	5.11122e-13	2.54785e-11
ENSG00000004478	FKBP4	FKBP4	1.52087	5.12279	8.19754e-05	0.000987214
ENSG00000164211	STARD4	STARD4	1.51598	5.42092	4.22036e-12	1.91032e-10
ENSG00000277443	MARCKS	MARCKS	1.51587	8.77543	1.04111e-09	3.56511e-08
ENSG00000172183	ISG20	ISG20	1.51485	7.19117	1.16346e-09	3.94976e-08
ENSG00000115419	GLS	GLS	1.50634	6.25123	1.16436e-08	3.4091e-07
ENSG00000034152	MAP2K3	MAP2K3	1.49342	8.2076	1.26098e-08	3.65129e-07
ENSG00000139722	VPS37B	VPS37B	1.4915	5.78336	3.01911e-09	9.58809e-08
ENSG00000162413	KLHL21	KLHL21	1.48785	5.29375	4.13724e-07	9.12743e-06
ENSG00000174010	KLHL15	KLHL15	1.47513	4.63514	3.97193e-06	6.99842e-05
ENSG00000128383	APOBEC3A	APOBEC3A	1.47342	8.09257	1.21055e-10	4.65088e-09
ENSG00000099331	MYO9B	MYO9B	1.46082	6.72848	5.61622e-11	2.31588e-09
ENSG00000163659	TIPARP	TIPARP	1.46058	7.22655	5.49341e-05	0.000695597
ENSG00000153201	RANBP2	RANBP2	1.45597	7.13321	4.27405e-10	1.54415e-08
ENSG00000065809	FAM107B	FAM107B	1.45352	6.99058	2.27218e-05	0.000324197
ENSG00000146278	PNRC1	PNRC1	1.45284	10.7165	2.54494e-13	1.31006e-11
ENSG00000134815	DHX34	DHX34	1.44984	4.61089	7.10151e-14	3.75379e-12
ENSG00000150787	PTS	PTS	1.44963	4.07473	3.83419e-13	1.94826e-11
ENSG00000135241	PNPLA8	PNPLA8	1.44626	7.16518	3.05925e-07	6.96378e-06
ENSG00000173846	PLK3	PLK3	1.43374	7.83093	6.52298e-07	1.37366e-05
ENSG00000147894	C9orf72	C9orf72	1.43274	7.00963	5.2245e-14	2.83781e-12
ENSG00000275993	SIK1B	SIK1B	1.42709	6.38039	3.30582e-06	5.9717e-05
ENSG00000211455	STK38L	STK38L	1.42704	5.88402	3.72247e-06	6.6181e-05
ENSG00000204020	LIPN	LIPN	1.42611	5.78478	1.43756e-09	4.81798e-08
ENSG00000065154	OAT	OAT	1.42367	6.04451	1.90955e-06	3.62401e-05
ENSG00000239911	PRKAG2-AS1	PRKAG2-AS1	1.42342	6.39828	2.75462e-11	1.16642e-09
ENSG00000178573	MAF	MAF	1.41908	4.01662	6.03176e-07	1.27705e-05
ENSG00000143322	ABL2	ABL2	1.4182	5.1599	2.91577e-09	9.29741e-08
ENSG00000148841	ITPRIP	ITPRIP	1.41658	6.06283	8.38241e-14	4.40133e-12
ENSG00000237541	HLA-DQA2	HLA-DQA2	1.41515	5.22417	1.44028e-05	0.00021899
ENSG00000237296	SMG1P1	SMG1P1	1.41502	4.16138	3.44456e-07	7.68607e-06
ENSG00000226471	Z93930.2	Z93930.2	1.4112	3.8174	6.05448e-06	0.000100601
ENSG00000221823	PPP3R1	PPP3R1	1.40973	4.35411	7.22939e-06	0.000117399
ENSG00000188229	TUBB4B	TUBB4B	1.40938	8.19907	2.6588e-09	8.54724e-08
ENSG00000167460	TPM4	TPM4	1.39418	8.5171	1.22593e-06	2.41991e-05
ENSG00000145780	FEM1C	FEM1C	1.39149	5.27344	1.11832e-07	2.71849e-06
ENSG00000180747	SMG1P3	SMG1P3	1.3823	4.39409	8.65239e-07	1.77464e-05
ENSG00000115919	KYNU	KYNU	1.38143	7.7394	2.84502e-08	7.59572e-07
ENSG00000145779	TNFAIP8	TNFAIP8	1.38034	7.97247	1.63727e-06	3.16834e-05
ENSG00000129757	CDKN1C	CDKN1C	1.37612	8.63156	0.00031021	0.00304641
ENSG00000257379	AC023509.1	AC023509.1	1.37482	3.58167	0.000162719	0.00179241
ENSG00000168439	STIP1	STIP1	1.37352	6.19905	8.80561e-08	2.18091e-06
ENSG00000142178	SIK1	SIK1	1.37147	6.15582	4.63698e-06	8.04116e-05
ENSG00000100591	AHSA1	AHSA1	1.36543	6.63897	4.16401e-07	9.15423e-06
ENSG00000100226	GTPBP1	GTPBP1	1.36378	3.89752	2.06235e-11	8.82775e-10
ENSG00000138069	RAB1A	RAB1A	1.36098	4.65012	1.09382e-10	4.26483e-09
ENSG00000181350	LRRC75A	LRRC75A	1.3608	6.55176	1.16076e-06	2.30778e-05
ENSG00000136842	TMOD1	TMOD1	1.35896	4.87562	6.02294e-07	1.27705e-05
ENSG00000270022	Z93241.1	Z93241.1	1.35643	4.74746	0.00861842	0.0427812
ENSG00000123983	ACSL3	ACSL3	1.35101	6.71022	1.11661e-07	2.71849e-06
ENSG00000124731	TREM1	TREM1	1.35047	7.28618	1.13742e-05	0.000176693
ENSG00000279088	AC022400.8	AC022400.8	1.35022	5.26451	3.58416e-12	1.63172e-10
ENSG00000188042	ARL4C	ARL4C	1.34885	7.20233	0.000177601	0.00192405
ENSG00000163870	TPRA1	TPRA1	1.34762	5.05338	2.35838e-12	1.07992e-10
ENSG00000108106	UBE2S	UBE2S	1.34494	6.96734	7.60222e-11	3.10233e-09
ENSG00000175471	MCTP1	MCTP1	1.34426	5.91595	5.82576e-08	1.49458e-06
ENSG00000198682	PAPSS2	PAPSS2	1.34152	4.69951	5.88378e-05	0.000740266
ENSG00000165030	NFIL3	NFIL3	1.34062	7.73323	1.7765e-10	6.66272e-09
ENSG00000148737	TCF7L2	TCF7L2	1.33731	7.14716	5.5259e-10	1.95166e-08
ENSG00000116514	RNF19B	RNF19B	1.33707	6.10557	2.29048e-09	7.48541e-08
ENSG00000196735	HLA-DQA1	HLA-DQA1	1.33345	6.94176	6.73141e-09	2.0391e-07
ENSG00000127666	TICAM1	TICAM1	1.33328	5.41693	1.44588e-05	0.000219417
ENSG00000177150	FAM210A	FAM210A	1.33126	4.8916	0.000767054	0.00650303
ENSG00000169756	LIMS1	LIMS1	1.32845	8.93458	1.10349e-11	4.77533e-10
ENSG00000138448	ITGAV	ITGAV	1.3282	4.89867	0.000120956	0.00139685
ENSG00000132334	PTPRE	PTPRE	1.3242	8.9524	4.55492e-14	2.49129e-12
ENSG00000277957	SENP3-EIF4A1	SENP3-EIF4A1	1.31766	7.42314	0.000124552	0.00142583
ENSG00000150977	RILPL2	RILPL2	1.31724	9.79898	6.77142e-12	2.99616e-10
ENSG00000144802	NFKBIZ	NFKBIZ	1.31619	9.27403	1.09881e-09	3.74643e-08
ENSG00000072364	AFF4	AFF4	1.31507	6.89828	1.06477e-10	4.19306e-09
ENSG00000104885	DOT1L	DOT1L	1.31322	5.3243	1.76941e-09	5.8554e-08
ENSG00000278970	HEIH	HEIH	1.31186	7.11196	4.68802e-10	1.68598e-08
ENSG00000143514	TP53BP2	TP53BP2	1.31154	6.017	6.99932e-10	2.43923e-08
ENSG00000111424	VDR	VDR	1.30716	4.49362	8.95815e-09	2.65242e-07
ENSG00000105993	DNAJB6	DNAJB6	1.30453	7.11944	1.32742e-06	2.61369e-05
ENSG00000147454	SLC25A37	SLC25A37	1.30421	8.91918	2.89867e-09	9.28044e-08
ENSG00000158869	FCER1G	FCER1G	1.30411	10.8686	9.23273e-13	4.38054e-11
ENSG00000162636	FAM102B	FAM102B	1.30373	4.23237	4.28822e-07	9.34416e-06
ENSG00000280138	AC027290.2	AC027290.2	1.30348	6.02707	9.13514e-08	2.24839e-06
ENSG00000223799	IL10RB-DT	IL10RB-DT	1.30122	5.61335	2.07737e-08	5.76104e-07
ENSG00000160789	LMNA	LMNA	1.29996	5.9332	3.62696e-05	0.000484991
ENSG00000171612	SLC25A33	SLC25A33	1.29928	5.1348	3.6771e-07	8.15797e-06
ENSG00000172216	CEBPB	CEBPB	1.29775	10.9957	5.21297e-13	2.58222e-11
ENSG00000172175	MALT1	MALT1	1.2971	6.621	4.50006e-13	2.25748e-11
ENSG00000131370	SH3BP5	SH3BP5	1.29609	8.03658	1.09313e-10	4.26483e-09
ENSG00000113615	SEC24A	SEC24A	1.2953	5.25108	1.81324e-06	3.46628e-05
ENSG00000008083	JARID2	JARID2	1.29054	8.32171	8.03235e-13	3.90511e-11
ENSG00000011566	MAP4K3	MAP4K3	1.2899	4.43881	4.32241e-09	1.34559e-07
ENSG00000143443	C1orf56	C1orf56	1.28884	6.21634	5.38668e-06	9.08468e-05
ENSG00000184602	SNN	SNN	1.2868	6.65367	1.64505e-10	6.19923e-09
ENSG00000185710	SMG1P4	SMG1P4	1.28661	3.04188	3.84778e-06	6.82547e-05
ENSG00000135698	MPHOSPH6	MPHOSPH6	1.28233	5.14109	8.2617e-06	0.000132794
ENSG00000197063	MAFG	MAFG	1.28113	7.43839	8.38917e-11	3.37389e-09
ENSG00000101901	ALG13	ALG13	1.27979	5.99306	5.96994e-09	1.82245e-07
ENSG00000126804	ZBTB1	ZBTB1	1.27928	6.00101	1.58241e-10	6.0208e-09
ENSG00000170340	B3GNT2	B3GNT2	1.27877	5.26069	0.000836053	0.00695328
ENSG00000206337	HCP5	HCP5	1.27468	4.9182	5.75404e-05	0.000727429
ENSG00000154359	LONRF1	LONRF1	1.27348	5.48375	7.94125e-08	1.98557e-06
ENSG00000090924	PLEKHG2	PLEKHG2	1.27026	5.05333	0.00209395	0.0142605
ENSG00000143420	ENSA	ENSA	1.26864	5.57612	3.78219e-09	1.18208e-07
ENSG00000197780	TAF13	TAF13	1.26359	5.75857	8.01824e-08	1.99847e-06
ENSG00000124831	LRRFIP1	LRRFIP1	1.26308	8.45882	2.1479e-10	7.90508e-09
ENSG00000196839	ADA	ADA	1.26282	5.11973	2.31408e-07	5.34677e-06
ENSG00000138386	NAB1	NAB1	1.251	4.82645	7.70712e-07	1.59321e-05
ENSG00000013441	CLK1	CLK1	1.2491	7.44735	6.97801e-11	2.86244e-09
ENSG00000158470	B4GALT5	B4GALT5	1.24749	5.86832	1.92635e-05	0.000281483
ENSG00000286219	AC242843.1	AC242843.1	1.24695	5.92661	1.70127e-06	3.27609e-05
ENSG00000110031	LPXN	LPXN	1.24616	6.20448	2.19198e-05	0.000313892
ENSG00000158985	CDC42SE2	CDC42SE2	1.24475	5.25444	9.19889e-11	3.65911e-09
ENSG00000173575	CHD2	CHD2	1.24303	7.23473	3.30222e-07	7.40977e-06
ENSG00000264343	NOTCH2NLA	NOTCH2NLA	1.24088	5.34409	9.9041e-09	2.92152e-07
ENSG00000118503	TNFAIP3	TNFAIP3	1.23889	9.91547	2.06271e-07	4.79229e-06
ENSG00000135077	HAVCR2	HAVCR2	1.23757	6.51222	9.0642e-07	1.84947e-05
ENSG00000102908	NFAT5	NFAT5	1.23513	5.59068	2.42565e-06	4.45325e-05
ENSG00000169554	ZEB2	ZEB2	1.23471	6.39247	1.80709e-08	5.10132e-07
ENSG00000144401	METTL21A	METTL21A	1.23454	4.84248	2.02332e-07	4.71471e-06
ENSG00000203760	CENPW	CENPW	1.22324	5.29907	4.97713e-06	8.50324e-05
ENSG00000172965	MIR4435-2HG	MIR4435-2HG	1.22138	5.94968	6.98062e-05	0.000855045
ENSG00000167553	TUBA1C	TUBA1C	1.21803	6.64145	6.36513e-08	1.61715e-06
ENSG00000259001	AL355075.4	AL355075.4	1.21778	4.81566	0.0084685	0.0423171
ENSG00000104324	CPQ	CPQ	1.21405	4.531	2.2148e-09	7.26822e-08
ENSG00000228224	NACA4P	NACA4P	1.21321	4.95138	0.000585041	0.00517728
ENSG00000153234	NR4A2	NR4A2	1.21058	9.03529	4.17264e-07	9.15423e-06
ENSG00000185201	IFITM2	IFITM2	1.2063	9.67182	7.62078e-06	0.000123501
ENSG00000135924	DNAJB2	DNAJB2	1.20437	5.15316	7.16947e-10	2.48752e-08
ENSG00000197299	BLM	BLM	1.20318	4.49941	1.37111e-07	3.30241e-06
ENSG00000166669	ATF7IP2	ATF7IP2	1.20128	3.9796	7.99988e-09	2.40243e-07
ENSG00000165714	BORCS5	BORCS5	1.1995	4.87479	6.67201e-07	1.4013e-05
ENSG00000169057	MECP2	MECP2	1.19939	6.14242	5.50643e-06	9.24705e-05
ENSG00000125812	GZF1	GZF1	1.19919	5.07327	3.98822e-06	7.01143e-05
ENSG00000281383	FP671120.5	FP671120.5	1.19791	8.99028	6.036e-06	0.000100506
ENSG00000164430	CGAS	CGAS	1.19762	5.45947	0.00368059	0.0219609
ENSG00000197818	SLC9A8	SLC9A8	1.19747	4.50897	1.61742e-08	4.6323e-07
ENSG00000269293	ZSCAN16-AS1	ZSCAN16-AS1	1.19613	5.98088	1.84148e-07	4.3294e-06
ENSG00000113068	PFDN1	PFDN1	1.19101	6.30631	2.06432e-10	7.6791e-09
ENSG00000173276	ZBTB21	ZBTB21	1.1893	4.29264	4.94327e-09	1.5328e-07
ENSG00000160953	PWWP3A	PWWP3A	1.18647	4.18726	2.37766e-06	4.38705e-05
ENSG00000197989	SNHG12	SNHG12	1.18396	4.97052	5.20784e-05	0.000666735
ENSG00000198900	TOP1	TOP1	1.18328	8.48689	2.96618e-10	1.07657e-08
ENSG00000233461	AL445524.1	AL445524.1	1.1818	5.969	6.78935e-05	0.000835515
ENSG00000159388	BTG2	BTG2	1.18004	8.11776	1.19285e-10	4.60533e-09
ENSG00000131759	RARA	RARA	1.17921	7.1398	7.69514e-10	2.6582e-08
ENSG00000103496	STX4	STX4	1.17749	6.22526	1.85379e-06	3.52667e-05
ENSG00000216490	IFI30	IFI30	1.17565	10.8667	5.44713e-12	2.43759e-10
ENSG00000258643	BCL2L2-PABPN1	BCL2L2-PABPN1	1.17533	5.95974	1.33527e-06	2.62259e-05
ENSG00000197620	CXorf40A	CXorf40A	1.17321	3.92286	0.000107612	0.00125563
ENSG00000228253	MT-ATP8	MT-ATP8	1.1721	7.99354	8.32556e-11	3.37389e-09
ENSG00000109046	WSB1	WSB1	1.17191	9.00979	7.4787e-07	1.55415e-05
ENSG00000043462	LCP2	LCP2	1.16642	7.73363	3.56859e-09	1.12876e-07
ENSG00000163961	RNF168	RNF168	1.16415	6.308	4.87375e-10	1.7448e-08
ENSG00000279838	AL356273.3	AL356273.3	1.16396	5.77527	6.41626e-06	0.000105942
ENSG00000241990	PRR34-AS1	PRR34-AS1	1.15956	4.59567	7.89087e-08	1.97925e-06
ENSG00000155096	AZIN1	AZIN1	1.15853	7.08469	2.14368e-08	5.92408e-07
ENSG00000121931	LRIF1	LRIF1	1.15493	4.74671	0.000542059	0.00486248
ENSG00000074416	MGLL	MGLL	1.15267	4.61826	3.88204e-05	0.000514729
ENSG00000157593	SLC35B2	SLC35B2	1.1526	4.66539	1.16327e-06	2.30778e-05
ENSG00000157557	ETS2	ETS2	1.14823	9.13191	2.067e-10	7.6791e-09
ENSG00000062716	VMP1	VMP1	1.14686	9.55707	2.30291e-08	6.25438e-07
ENSG00000181409	AATK	AATK	1.14597	4.42431	1.69232e-05	0.000251485
ENSG00000112110	MRPL18	MRPL18	1.1441	7.06178	6.49983e-06	0.00010688
ENSG00000229833	PET100	PET100	1.14282	8.64299	5.40554e-09	1.66305e-07
ENSG00000006634	DBF4	DBF4	1.14139	4.61277	1.86684e-08	5.25116e-07
ENSG00000115520	COQ10B	COQ10B	1.13685	6.30861	6.23638e-08	1.58957e-06
ENSG00000168906	MAT2A	MAT2A	1.13549	7.86386	5.57919e-07	1.19083e-05
ENSG00000144136	SLC20A1	SLC20A1	1.13281	6.68287	9.67479e-05	0.0011396
ENSG00000238142	BX284668.5	BX284668.5	1.13248	6.67676	2.07603e-08	5.76104e-07
ENSG00000173559	NABP1	NABP1	1.13051	7.18195	2.30138e-08	6.25438e-07
ENSG00000269893	SNHG8	SNHG8	1.12791	8.37816	8.02234e-09	2.40243e-07
ENSG00000173349	SFT2D3	SFT2D3	1.12514	5.18221	2.03898e-05	0.000295745
ENSG00000198003	CCDC151	CCDC151	1.12081	4.74606	0.000233356	0.00240564
ENSG00000166233	ARIH1	ARIH1	1.11945	6.6946	4.58792e-06	7.99435e-05
ENSG00000110852	CLEC2B	CLEC2B	1.1184	8.33437	7.18028e-06	0.000116843
ENSG00000163162	RNF149	RNF149	1.11811	7.69175	3.72249e-09	1.16806e-07
ENSG00000279765	AC013394.1	AC013394.1	1.11412	4.01882	1.99866e-07	4.67106e-06
ENSG00000242247	ARFGAP3	ARFGAP3	1.11204	7.10641	0.00010018	0.00117238
ENSG00000265666	RARA-AS1	RARA-AS1	1.11001	5.22523	5.69893e-08	1.46682e-06
ENSG00000076641	PAG1	PAG1	1.10771	7.05121	1.15658e-05	0.000178972
ENSG00000128016	ZFP36	ZFP36	1.10555	10.6154	5.2833e-06	8.92946e-05
ENSG00000143751	SDE2	SDE2	1.10378	5.45845	3.06837e-07	6.9644e-06
ENSG00000131871	SELENOS	SELENOS	1.10253	7.58249	8.50534e-09	2.52785e-07
ENSG00000101773	RBBP8	RBBP8	1.10238	4.84756	2.90122e-05	0.000400877
ENSG00000174021	GNG5	GNG5	1.10174	9.62275	1.17755e-10	4.56866e-09
ENSG00000125844	RRBP1	RRBP1	1.10142	7.01848	9.60942e-07	1.9456e-05
ENSG00000165732	DDX21	DDX21	1.09665	9.09404	2.70693e-10	9.87029e-09
ENSG00000271869	AC026979.2	AC026979.2	1.09403	5.30148	6.39135e-07	1.34955e-05
ENSG00000164691	TAGAP	TAGAP	1.09363	6.84522	4.82611e-05	0.000624145
ENSG00000205155	PSENEN	PSENEN	1.09259	6.37195	1.4656e-07	3.50852e-06
ENSG00000011295	TTC19	TTC19	1.09246	5.79041	4.43622e-07	9.62524e-06
ENSG00000131873	CHSY1	CHSY1	1.08952	6.05703	4.77411e-06	8.22777e-05
ENSG00000259781	HMGB1P6	HMGB1P6	1.08431	5.52441	8.50123e-09	2.52785e-07
ENSG00000164933	SLC25A32	SLC25A32	1.08393	3.64018	2.15417e-06	4.02044e-05
ENSG00000135905	DOCK10	DOCK10	1.0828	5.99728	4.04466e-06	7.07905e-05
ENSG00000258227	CLEC5A	CLEC5A	1.08001	4.69914	0.00221599	0.0148537
ENSG00000026652	AGPAT4	AGPAT4	1.07962	4.63571	0.000283588	0.00283444
ENSG00000158615	PPP1R15B	PPP1R15B	1.07785	7.79846	1.07969e-05	0.000169058
ENSG00000101421	CHMP4B	CHMP4B	1.07425	7.67926	1.35304e-08	3.9035e-07
ENSG00000185168	LINC00482	LINC00482	1.07148	4.93935	1.52834e-05	0.000230599
ENSG00000128590	DNAJB9	DNAJB9	1.07091	5.0281	1.27198e-05	0.000195667
ENSG00000125995	ROMO1	ROMO1	1.06776	7.92953	2.22386e-08	6.10284e-07
ENSG00000171867	PRNP	PRNP	1.06515	7.98865	0.000787712	0.00663531
ENSG00000196396	PTPN1	PTPN1	1.06433	7.20448	2.19571e-08	6.04666e-07
ENSG00000183648	NDUFB1	NDUFB1	1.0578	9.08814	3.2655e-06	5.91244e-05
ENSG00000167703	SLC43A2	SLC43A2	1.05712	8.38496	1.82325e-09	6.00834e-08
ENSG00000008952	SEC62	SEC62	1.05575	8.69118	1.59819e-07	3.79137e-06
ENSG00000169020	ATP5ME	ATP5ME	1.05112	9.44932	4.51832e-07	9.77644e-06
ENSG00000138495	COX17	COX17	1.04921	8.41282	3.70777e-09	1.16806e-07
ENSG00000108256	NUFIP2	NUFIP2	1.0483	7.62917	6.15049e-05	0.000765265
ENSG00000075785	RAB7A	RAB7A	1.04658	5.82377	0.000170004	0.00186224
ENSG00000272779	AC245060.4	AC245060.4	1.04655	3.90561	1.85559e-05	0.000272661
ENSG00000167470	MIDN	MIDN	1.046	8.45557	1.50987e-07	3.59268e-06
ENSG00000239569	KMT2E-AS1	KMT2E-AS1	1.04447	4.68987	1.92481e-06	3.64418e-05
ENSG00000282870	FRG1DP	FRG1DP	1.04413	4.11899	1.82955e-06	3.48899e-05
ENSG00000080371	RAB21	RAB21	1.03942	7.58074	3.09845e-08	8.2444e-07
ENSG00000015568	RGPD5	RGPD5	1.03733	3.24194	1.98143e-05	0.000288461
ENSG00000102531	FNDC3A	FNDC3A	1.03574	6.31289	0.00237087	0.0156259
ENSG00000009413	REV3L	REV3L	1.03517	5.89958	7.67147e-07	1.59001e-05
ENSG00000188313	PLSCR1	PLSCR1	1.03387	7.4298	3.47948e-06	6.24246e-05
ENSG00000183864	TOB2	TOB2	1.03249	5.58567	0.000516094	0.00466142
ENSG00000164548	TRA2A	TRA2A	1.02931	7.31027	1.44042e-07	3.45876e-06
ENSG00000179119	SPTY2D1	SPTY2D1	1.02703	6.12506	1.00355e-05	0.000158079
ENSG00000120063	GNA13	GNA13	1.02667	7.10517	2.94241e-06	5.3769e-05
ENSG00000147459	DOCK5	DOCK5	1.02525	5.27032	5.29889e-05	0.000676403
ENSG00000001630	CYP51A1	CYP51A1	1.02089	4.12274	0.000226074	0.00234593
ENSG00000165943	MOAP1	MOAP1	1.02055	5.45028	0.000447627	0.00415255
ENSG00000219665	ZNF433-AS1	ZNF433-AS1	1.02054	3.19942	2.93922e-05	0.00040471
ENSG00000170906	NDUFA3	NDUFA3	1.01795	8.3233	7.62006e-09	2.29945e-07
ENSG00000170873	MTSS1	MTSS1	1.01728	7.71573	3.00292e-05	0.000411516
ENSG00000155366	RHOC	RHOC	1.01566	7.34771	0.000306261	0.00301138
ENSG00000124380	SNRNP27	SNRNP27	1.01306	4.34077	2.98822e-07	6.82179e-06
ENSG00000139687	RB1	RB1	1.01182	6.00504	3.10116e-07	7.0186e-06
ENSG00000141580	WDR45B	WDR45B	1.0097	6.17314	3.59724e-05	0.000482656
ENSG00000052795	FNIP2	FNIP2	1.00752	6.60484	1.519e-06	2.95398e-05
ENSG00000141232	TOB1	TOB1	1.00578	7.3819	5.61578e-06	9.39063e-05
ENSG00000145990	GFOD1	GFOD1	1.00167	5.47342	1.88733e-07	4.424e-06
ENSG00000253210	AC040970.1	AC040970.1	1.00128	4.41707	3.92557e-05	0.000519627
ENSG00000267855	NDUFA7	NDUFA7	0.999802	7.20855	4.35154e-08	1.13111e-06
ENSG00000122566	HNRNPA2B1	HNRNPA2B1	0.998317	10.3055	5.95425e-08	1.52259e-06
ENSG00000135604	STX11	STX11	0.984636	8.40551	8.56984e-07	1.7623e-05
ENSG00000171049	FPR2	FPR2	0.984095	6.49796	0.00355541	0.0214578
ENSG00000169860	P2RY1	P2RY1	0.983166	5.41595	2.58436e-05	0.000362178
ENSG00000110713	NUP98	NUP98	0.982393	4.31893	2.97277e-07	6.80627e-06
ENSG00000151726	ACSL1	ACSL1	0.981442	8.51385	4.1358e-08	1.0786e-06
ENSG00000086062	B4GALT1	B4GALT1	0.979981	5.23158	0.000221267	0.00230516
ENSG00000136371	MTHFS	MTHFS	0.973201	6.04249	3.67224e-07	8.15797e-06
ENSG00000137801	THBS1	THBS1	0.970319	10.7899	5.21468e-05	0.000666735
ENSG00000157764	BRAF	BRAF	0.968543	4.97571	0.00204922	0.0140589
ENSG00000168273	SMIM4	SMIM4	0.96553	5.71799	0.000829568	0.00692826
ENSG00000136758	YME1L1	YME1L1	0.965504	8.20812	0.00023376	0.00240665
ENSG00000110721	CHKA	CHKA	0.962881	5.67403	0.00111885	0.00873344
ENSG00000120306	CYSTM1	CYSTM1	0.954427	4.54091	3.73628e-05	0.000497918
ENSG00000179029	TMEM107	TMEM107	0.952982	6.4608	1.77355e-06	3.39866e-05
ENSG00000110046	ATG2A	ATG2A	0.952721	5.60014	0.000252499	0.00256935
ENSG00000109519	GRPEL1	GRPEL1	0.950252	6.89651	8.15951e-06	0.00013142
ENSG00000161921	CXCL16	CXCL16	0.949633	7.72153	3.32789e-06	5.98412e-05
ENSG00000215845	TSTD1	TSTD1	0.949162	5.05249	0.00104838	0.00829856
ENSG00000144566	RAB5A	RAB5A	0.948583	6.51261	2.0183e-06	3.79382e-05
ENSG00000120705	ETF1	ETF1	0.947607	7.50289	2.13554e-05	0.000308615
ENSG00000164182	NDUFAF2	NDUFAF2	0.946552	5.99476	8.82522e-06	0.000140703
ENSG00000173915	ATP5MD	ATP5MD	0.946439	9.61955	6.70675e-08	1.69302e-06
ENSG00000266302	AC098850.3	AC098850.3	0.945697	3.21173	4.85629e-05	0.000625993
ENSG00000111678	C12orf57	C12orf57	0.9451	6.09696	0.00103057	0.00819052
ENSG00000104783	KCNN4	KCNN4	0.945072	4.6117	0.000363551	0.00348336
ENSG00000166484	MAPK7	MAPK7	0.944303	5.25948	0.00112797	0.0087872
ENSG00000258476	LINC02207	LINC02207	0.943419	5.33863	0.000654565	0.00569652
ENSG00000131051	RBM39	RBM39	0.943064	9.62288	4.2948e-07	9.34416e-06
ENSG00000104714	ERICH1	ERICH1	0.942833	7.44249	2.72618e-06	4.99334e-05
ENSG00000175066	GK5	GK5	0.941916	5.14841	1.07452e-05	0.000168585
ENSG00000160326	SLC2A6	SLC2A6	0.940935	6.75033	9.24303e-06	0.000146752
ENSG00000120889	TNFRSF10B	TNFRSF10B	0.940875	5.53234	2.18368e-05	0.000313273
ENSG00000243927	MRPS6	MRPS6	0.940831	5.52793	0.0100167	0.0474964
ENSG00000111011	RSRC2	RSRC2	0.93906	7.77769	1.1736e-07	2.84408e-06
ENSG00000123908	AGO2	AGO2	0.938715	6.45268	1.73531e-06	3.33349e-05
ENSG00000287115	AC009951.3	AC009951.3	0.938619	4.85177	4.94086e-06	8.47804e-05
ENSG00000197728	RPS26	RPS26	0.938343	11.4969	2.00203e-06	3.78129e-05
ENSG00000285772	AC000120.2	AC000120.2	0.936948	3.96483	0.000984623	0.00790509
ENSG00000113575	PPP2CA	PPP2CA	0.936186	5.45807	9.78789e-07	1.9716e-05
ENSG00000109971	HSPA8	HSPA8	0.936064	9.431	3.69558e-06	6.58516e-05
ENSG00000225630	MTND2P28	MTND2P28	0.934467	5.34639	2.32602e-06	4.31052e-05
ENSG00000167995	BEST1	BEST1	0.933287	5.02174	0.000317316	0.00310843
ENSG00000054967	RELT	RELT	0.932495	6.86135	7.95117e-06	0.000128327
ENSG00000130449	ZSWIM6	ZSWIM6	0.930957	6.83345	0.00101051	0.00804728
ENSG00000143256	PFDN2	PFDN2	0.927664	8.16396	2.18082e-06	4.06056e-05
ENSG00000206573	THUMPD3-AS1	THUMPD3-AS1	0.927601	5.62826	0.0001512	0.00167962
ENSG00000196083	IL1RAP	IL1RAP	0.927561	4.10318	6.8953e-06	0.000112578
ENSG00000008513	ST3GAL1	ST3GAL1	0.924985	6.41292	1.42272e-06	2.77359e-05
ENSG00000102786	INTS6	INTS6	0.924067	5.59275	0.00443662	0.0254912
ENSG00000142396	ERVK3-1	ERVK3-1	0.923898	4.53991	1.70452e-05	0.000252346
ENSG00000166927	MS4A7	MS4A7	0.923792	8.67452	8.31157e-05	0.000999419
ENSG00000166337	TAF10	TAF10	0.9235	8.03919	3.24903e-07	7.33219e-06
ENSG00000051108	HERPUD1	HERPUD1	0.922995	9.19953	2.86019e-05	0.000395903
ENSG00000176018	LYSMD3	LYSMD3	0.922896	4.78798	2.48109e-05	0.000351965
ENSG00000125741	OPA3	OPA3	0.922029	3.68729	2.84257e-05	0.000394156
ENSG00000278743	AC087239.1	AC087239.1	0.921889	5.28827	0.000997218	0.00795754
ENSG00000111859	NEDD9	NEDD9	0.920708	6.17397	2.80457e-05	0.000389572
ENSG00000143622	RIT1	RIT1	0.919407	7.31152	1.12989e-05	0.000176218
ENSG00000136273	HUS1	HUS1	0.919402	5.93153	5.22442e-06	8.86027e-05
ENSG00000105939	ZC3HAV1	ZC3HAV1	0.918254	6.59313	0.000281401	0.00281616
ENSG00000168036	CTNNB1	CTNNB1	0.916794	5.1399	3.03774e-06	5.52635e-05
ENSG00000174485	DENND4A	DENND4A	0.916487	5.19491	8.49896e-05	0.00102039
ENSG00000137393	RNF144B	RNF144B	0.915566	8.6148	7.12095e-07	1.48372e-05
ENSG00000115539	PDCL3	PDCL3	0.912379	6.21396	9.31278e-07	1.8904e-05
ENSG00000067048	DDX3Y	DDX3Y	0.912116	7.34078	1.28772e-05	0.000197443
ENSG00000168374	ARF4	ARF4	0.910834	7.10924	3.03823e-06	5.52635e-05
ENSG00000144426	NBEAL1	NBEAL1	0.909342	3.95665	0.000349969	0.00338204
ENSG00000167378	IRGQ	IRGQ	0.909053	3.86856	0.000982838	0.00789881
ENSG00000020633	RUNX3	RUNX3	0.908864	5.27737	0.00179785	0.0127797
ENSG00000161011	SQSTM1	SQSTM1	0.907752	8.69154	0.00127984	0.00974854
ENSG00000155090	KLF10	KLF10	0.9068	7.99806	3.93473e-06	6.96404e-05
ENSG00000197451	HNRNPAB	HNRNPAB	0.906677	7.44285	4.26372e-07	9.32807e-06
ENSG00000245060	LINC00847	LINC00847	0.905706	4.7388	6.90389e-06	0.000112578
ENSG00000119669	IRF2BPL	IRF2BPL	0.904422	5.78846	0.00132101	0.00999215
ENSG00000104131	EIF3J	EIF3J	0.900139	6.6836	0.000209031	0.00220687
ENSG00000154582	ELOC	ELOC	0.898559	7.35107	4.91781e-07	1.05827e-05
ENSG00000142867	BCL10	BCL10	0.892427	6.59482	0.00166689	0.0120223
ENSG00000182372	CLN8	CLN8	0.890291	4.45612	0.00194394	0.0134775
ENSG00000196262	PPIA	PPIA	0.888912	9.35518	3.17139e-06	5.75526e-05
ENSG00000238057	ZEB2-AS1	ZEB2-AS1	0.885358	5.30513	4.59226e-05	0.000598818
ENSG00000104375	STK3	STK3	0.884822	4.07184	6.74692e-05	0.000832896
ENSG00000144597	EAF1	EAF1	0.883204	5.35633	0.00473219	0.0268328
ENSG00000197872	FAM49A	FAM49A	0.883068	7.71265	1.00462e-06	2.01846e-05
ENSG00000253982	AC100810.1	AC100810.1	0.88238	6.85031	1.06222e-05	0.000166987
ENSG00000286019	AC239811.1	AC239811.1	0.881785	4.70213	0.000269309	0.00271237
ENSG00000104825	NFKBIB	NFKBIB	0.876799	5.09641	5.05103e-05	0.000647913
ENSG00000163399	ATP1A1	ATP1A1	0.875983	6.22254	3.53317e-05	0.000476156
ENSG00000105281	SLC1A5	SLC1A5	0.87184	5.67635	0.00454809	0.0260136
ENSG00000214174	AMZ2P1	AMZ2P1	0.869015	5.41686	0.00021799	0.00228309
ENSG00000153066	TXNDC11	TXNDC11	0.868804	5.71021	5.7835e-05	0.000729982
ENSG00000166012	TAF1D	TAF1D	0.865465	7.89913	8.62055e-05	0.00103185
ENSG00000126005	MMP24OS	MMP24OS	0.864844	5.23485	4.24614e-05	0.000557377
ENSG00000235288	AC099329.1	AC099329.1	0.864619	3.35675	0.000150835	0.00167793
ENSG00000147804	SLC39A4	SLC39A4	0.861441	4.63864	2.15543e-05	0.000309784
ENSG00000110330	BIRC2	BIRC2	0.861366	6.68105	0.00049926	0.00455687
ENSG00000026103	FAS	FAS	0.860893	5.1099	0.00110056	0.00862919
ENSG00000273338	AC103591.3	AC103591.3	0.86089	5.4193	0.000429511	0.00402654
ENSG00000224397	SMIM25	SMIM25	0.860292	9.46529	0.000648069	0.0056533
ENSG00000088448	ANKRD10	ANKRD10	0.858932	5.51607	1.79486e-05	0.000264231
ENSG00000114784	EIF1B	EIF1B	0.85749	8.38826	2.04144e-06	3.82818e-05
ENSG00000007312	CD79B	CD79B	0.857189	4.36259	0.00117325	0.00906825
ENSG00000136717	BIN1	BIN1	0.85661	5.2063	0.000195679	0.0020883
ENSG00000158411	MITD1	MITD1	0.8565	5.61736	1.38085e-05	0.000211177
ENSG00000026297	RNASET2	RNASET2	0.856209	9.23956	1.7305e-05	0.000255711
ENSG00000176595	KBTBD11	KBTBD11	0.855571	5.79597	0.0060322	0.0323856
ENSG00000082153	BZW1	BZW1	0.855029	7.64139	2.12385e-05	0.00030749
ENSG00000120159	CAAP1	CAAP1	0.852003	4.59112	0.000240507	0.00246004
ENSG00000073803	MAP3K13	MAP3K13	0.850646	4.72634	0.00260235	0.016911
ENSG00000117228	GBP1	GBP1	0.850555	6.47243	0.000211722	0.00223229
ENSG00000281571	AC241585.2	AC241585.2	0.848574	4.12025	2.68468e-05	0.000374239
ENSG00000104320	NBN	NBN	0.84801	6.77526	0.000140898	0.00157854
ENSG00000177889	UBE2N	UBE2N	0.847877	7.07562	6.79476e-06	0.000111259
ENSG00000181873	IBA57	IBA57	0.846738	4.56983	8.60561e-05	0.00103163
ENSG00000064932	SBNO2	SBNO2	0.845889	5.30095	1.55172e-05	0.000233678
ENSG00000285565	AL671762.1	AL671762.1	0.845798	6.28257	0.00170246	0.0122341
ENSG00000003402	CFLAR	CFLAR	0.845558	8.78546	0.000158966	0.00175845
ENSG00000183878	UTY	UTY	0.84537	5.04139	0.00119709	0.00921987
ENSG00000265808	SEC22B	SEC22B	0.844321	6.83162	0.0017359	0.0123953
ENSG00000187837	HIST1H1C	HIST1H1C	0.843251	4.71629	0.00361265	0.0216704
ENSG00000120438	TCP1	TCP1	0.843161	7.05455	0.000175844	0.00191291
ENSG00000171988	JMJD1C	JMJD1C	0.842498	8.43427	4.47207e-06	7.80977e-05
ENSG00000077721	UBE2A	UBE2A	0.842333	6.57422	5.0911e-06	8.67912e-05
ENSG00000285646	AL021155.2	AL021155.2	0.842311	4.28296	3.50171e-05	0.000473061
ENSG00000241058	NSUN6	NSUN6	0.841402	4.24474	8.69707e-05	0.00103943
ENSG00000164674	SYTL3	SYTL3	0.841117	4.97509	0.000215498	0.00226001
ENSG00000103121	CMC2	CMC2	0.839804	5.22857	2.65487e-05	0.000370741
ENSG00000140264	SERF2	SERF2	0.836149	11.8338	6.85562e-07	1.43222e-05
ENSG00000095564	BTAF1	BTAF1	0.835939	5.9854	0.000144452	0.00161606
ENSG00000124767	GLO1	GLO1	0.835581	6.08556	0.000170641	0.00186662
ENSG00000039319	ZFYVE16	ZFYVE16	0.834518	7.01788	0.00022406	0.0023281
ENSG00000099797	TECR	TECR	0.834199	6.3912	3.53671e-05	0.000476156
ENSG00000179743	AL450998.2	AL450998.2	0.833835	5.18685	0.00836652	0.0419979
ENSG00000169967	MAP3K2	MAP3K2	0.831681	8.5027	0.00014684	0.00163812
ENSG00000288632	NA	NA	0.829701	2.76359	0.00244748	0.0160236
ENSG00000183696	UPP1	UPP1	0.829273	9.36606	2.59704e-05	0.000363309
ENSG00000196449	YRDC	YRDC	0.828036	5.51023	0.000624174	0.00546829
ENSG00000133858	ZFC3H1	ZFC3H1	0.82749	6.91615	1.48399e-05	0.000224767
ENSG00000213722	DDAH2	DDAH2	0.826814	6.60024	3.00434e-05	0.000411516
ENSG00000153391	INO80C	INO80C	0.825574	3.18616	0.000954153	0.00772537
ENSG00000155542	SETD9	SETD9	0.822478	3.59853	0.00160625	0.0116812
ENSG00000240972	MIF	MIF	0.819923	8.6	2.38035e-06	4.38705e-05
ENSG00000111775	COX6A1	COX6A1	0.819865	9.29733	3.49218e-06	6.251e-05
ENSG00000104897	SF3A2	SF3A2	0.819079	5.24699	0.00197142	0.013644
ENSG00000167978	SRRM2	SRRM2	0.816329	8.99906	5.60419e-06	9.39063e-05
ENSG00000171522	PTGER4	PTGER4	0.816175	6.07021	0.00618507	0.0330935
ENSG00000231607	DLEU2	DLEU2	0.815401	6.2265	0.000601895	0.00529668
ENSG00000178996	SNX18	SNX18	0.813715	6.82217	0.00301898	0.0190068
ENSG00000015475	BID	BID	0.813519	8.36159	2.3226e-05	0.000330792
ENSG00000105643	ARRDC2	ARRDC2	0.811941	6.09941	0.000755486	0.00643182
ENSG00000267216	AC020915.1	AC020915.1	0.811362	3.68086	0.00036311	0.00348336
ENSG00000281741	AC241377.3	AC241377.3	0.810496	4.07648	6.83077e-05	0.0008393
ENSG00000101972	STAG2	STAG2	0.807505	6.90988	0.000174489	0.00190213
ENSG00000205339	IPO7	IPO7	0.807111	6.58832	0.000154709	0.00171618
ENSG00000235065	RPL24P2	RPL24P2	0.805127	6.32235	0.000118152	0.00136647
ENSG00000125534	PPDPF	PPDPF	0.803537	9.07928	0.000290779	0.00288435
ENSG00000112245	PTP4A1	PTP4A1	0.803449	5.77589	0.00199399	0.0137761
ENSG00000153207	AHCTF1	AHCTF1	0.801467	5.84169	0.000184359	0.00199179
ENSG00000162645	GBP2	GBP2	0.801244	7.62536	0.000833352	0.00694548
ENSG00000083896	YTHDC1	YTHDC1	0.801117	7.31765	3.24953e-05	0.000441264
ENSG00000105402	NAPA	NAPA	0.799204	5.90567	3.15534e-05	0.000430701
ENSG00000163877	SNIP1	SNIP1	0.798527	4.42321	0.00816557	0.0413051
ENSG00000185507	IRF7	IRF7	0.797012	6.64864	0.00094826	0.00769948
ENSG00000137947	GTF2B	GTF2B	0.796391	6.5266	0.00394453	0.0231671
ENSG00000033867	SLC4A7	SLC4A7	0.795769	5.40054	0.00302165	0.0190082
ENSG00000165312	OTUD1	OTUD1	0.792759	7.00925	0.000510958	0.00462563
ENSG00000272288	AL451165.2	AL451165.2	0.791235	4.5814	9.49072e-05	0.00112236
ENSG00000136709	WDR33	WDR33	0.790629	6.35133	4.75021e-05	0.000615339
ENSG00000248333	CDK11B	CDK11B	0.790457	6.76853	2.15229e-05	0.000309784
ENSG00000110958	PTGES3	PTGES3	0.789373	8.92441	1.64157e-05	0.000246173
ENSG00000185650	ZFP36L1	ZFP36L1	0.789287	8.86662	6.9805e-05	0.000855045
ENSG00000106615	RHEB	RHEB	0.786605	7.16591	1.69905e-05	0.000252009
ENSG00000116560	SFPQ	SFPQ	0.786473	8.95487	7.86047e-06	0.000127123
ENSG00000198604	BAZ1A	BAZ1A	0.784521	8.24801	0.000562071	0.00501345
ENSG00000132680	KHDC4	KHDC4	0.782975	4.53586	0.000351055	0.00338433
ENSG00000132963	POMP	POMP	0.780931	9.11463	0.000133868	0.00151487
ENSG00000270231	NBPF8	NBPF8	0.780505	3.45122	0.00174578	0.0124545
ENSG00000204220	PFDN6	PFDN6	0.780039	5.97383	0.000380471	0.00361907
ENSG00000176463	SLCO3A1	SLCO3A1	0.778306	6.20219	6.77571e-05	0.000835141
ENSG00000222041	CYTOR	CYTOR	0.776576	5.24761	0.000590146	0.00520492
ENSG00000102309	PIN4	PIN4	0.776383	6.65953	0.00013902	0.00155972
ENSG00000233901	LINC01503	LINC01503	0.775774	4.7853	0.000219451	0.00229312
ENSG00000129315	CCNT1	CCNT1	0.775586	5.47498	0.000616643	0.00540833
ENSG00000183955	KMT5A	KMT5A	0.774719	5.41806	0.000219529	0.00229312
ENSG00000160199	PKNOX1	PKNOX1	0.774073	4.47038	0.00740611	0.0380003
ENSG00000134602	STK26	STK26	0.773137	5.26855	0.000788829	0.00663763
ENSG00000197782	ZNF780A	ZNF780A	0.772595	4.54606	0.000121909	0.00139964
ENSG00000125772	GPCPD1	GPCPD1	0.771567	8.19381	0.00013108	0.00149405
ENSG00000168003	SLC3A2	SLC3A2	0.770875	7.81547	0.00114044	0.00886687
ENSG00000055044	NOP58	NOP58	0.769629	6.26342	0.00025785	0.00261031
ENSG00000204054	LINC00963	LINC00963	0.769247	5.67041	0.000229162	0.00236551
ENSG00000232112	TMA7	TMA7	0.768673	10.5504	5.85491e-06	9.76976e-05
ENSG00000186407	CD300E	CD300E	0.76721	7.62334	0.00161737	0.0117296
ENSG00000071082	RPL31	RPL31	0.767053	10.5929	7.92423e-05	0.000957227
ENSG00000185728	YTHDF3	YTHDF3	0.766776	6.48973	9.36553e-05	0.00111089
ENSG00000183019	MCEMP1	MCEMP1	0.764486	6.19455	0.00937097	0.0452351
ENSG00000247774	PCED1B-AS1	PCED1B-AS1	0.764042	4.3582	0.00134422	0.0101119
ENSG00000127507	ADGRE2	ADGRE2	0.761666	7.3104	0.000103005	0.00120366
ENSG00000163170	BOLA3	BOLA3	0.760827	4.49485	0.00321459	0.0199057
ENSG00000177576	C18orf32	C18orf32	0.760677	4.89433	0.000213958	0.00225285
ENSG00000163605	PPP4R2	PPP4R2	0.758041	6.94086	0.000325132	0.00317316
ENSG00000151694	ADAM17	ADAM17	0.757901	7.79099	0.000207461	0.00219324
ENSG00000107537	PHYH	PHYH	0.757881	4.81127	0.00452907	0.0259425
ENSG00000102409	BEX4	BEX4	0.757861	5.74996	0.000383811	0.00364205
ENSG00000160213	CSTB	CSTB	0.757266	9.81427	1.64407e-05	0.000246173
ENSG00000173486	FKBP2	FKBP2	0.756309	6.43016	6.10868e-05	0.000762471
ENSG00000161547	SRSF2	SRSF2	0.753449	8.12523	2.51262e-05	0.000354648
ENSG00000117000	RLF	RLF	0.752549	5.598	9.31237e-05	0.00110625
ENSG00000241468	ATP5MF	ATP5MF	0.751541	9.3387	1.40425e-05	0.000214338
ENSG00000214176	PLEKHM1P1	PLEKHM1P1	0.750881	4.8567	0.000851638	0.00704569
ENSG00000072310	SREBF1	SREBF1	0.750822	3.57855	0.0021293	0.0144447
ENSG00000147586	MRPS28	MRPS28	0.750758	5.38115	0.000503896	0.00458614
ENSG00000011198	ABHD5	ABHD5	0.749003	6.39792	7.24778e-05	0.000883646
ENSG00000143977	SNRPG	SNRPG	0.748488	8.50881	1.65802e-05	0.000247321
ENSG00000139793	MBNL2	MBNL2	0.746174	5.55014	9.419e-05	0.00111555
ENSG00000166432	ZMAT1	ZMAT1	0.745768	4.5833	0.00135925	0.0101956
ENSG00000104856	RELB	RELB	0.745619	5.70243	0.00389958	0.0229545
ENSG00000142227	EMP3	EMP3	0.745029	10.7043	0.000121497	0.00139899
ENSG00000088205	DDX18	DDX18	0.744189	8.00698	0.000922831	0.00753964
ENSG00000115053	NCL	NCL	0.742971	9.01874	0.000274125	0.00275033
ENSG00000149089	APIP	APIP	0.741896	5.55123	0.00027204	0.00273639
ENSG00000124228	DDX27	DDX27	0.74174	6.65337	0.000107957	0.00125779
ENSG00000257923	CUX1	CUX1	0.740673	6.74534	0.00365872	0.0218622
ENSG00000170540	ARL6IP1	ARL6IP1	0.740617	7.11235	0.000487931	0.00447169
ENSG00000231312	MAP4K3-DT	MAP4K3-DT	0.740142	3.52447	0.00120104	0.00922866
ENSG00000150093	ITGB1	ITGB1	0.739567	8.09158	0.000123456	0.00141535
ENSG00000145781	COMMD10	COMMD10	0.737791	4.1685	0.000286084	0.00284854
ENSG00000128487	SPECC1	SPECC1	0.737602	4.62186	0.00158628	0.0115681
ENSG00000106829	TLE4	TLE4	0.737428	7.27409	0.00108589	0.00854391
ENSG00000023041	ZDHHC6	ZDHHC6	0.735562	4.8112	0.00294091	0.0186499
ENSG00000273320	AC007032.1	AC007032.1	0.734169	5.22787	0.00140849	0.010525
ENSG00000128739	SNRPN	SNRPN	0.734065	4.99403	0.0012092	0.00928229
ENSG00000285976	AL135905.2	AL135905.2	0.733526	5.82291	0.00486366	0.0274007
ENSG00000143924	EML4	EML4	0.733197	5.91708	0.00114565	0.00888978
ENSG00000286264	AP001453.5	AP001453.5	0.732602	6.44532	0.000111982	0.00130084
ENSG00000065135	GNAI3	GNAI3	0.732169	7.7362	0.000114307	0.00132589
ENSG00000203747	FCGR3A	FCGR3A	0.730613	9.2738	0.00868866	0.0429579
ENSG00000135090	TAOK3	TAOK3	0.730325	7.60271	3.59379e-05	0.000482656
ENSG00000073417	PDE8A	PDE8A	0.729927	4.49485	0.000676535	0.00587474
ENSG00000108175	ZMIZ1	ZMIZ1	0.727864	6.0575	0.000296699	0.0029331
ENSG00000162889	MAPKAPK2	MAPKAPK2	0.727575	6.71777	8.0563e-05	0.000971691
ENSG00000266094	RASSF5	RASSF5	0.727314	7.03492	0.00813472	0.0411755
ENSG00000163660	CCNL1	CCNL1	0.726945	9.31692	0.000236649	0.00243005
ENSG00000105401	CDC37	CDC37	0.726269	8.01768	2.93924e-05	0.00040471
ENSG00000197622	CDC42SE1	CDC42SE1	0.725846	8.19962	9.67992e-05	0.0011396
ENSG00000100138	SNU13	SNU13	0.725844	8.54288	5.84232e-05	0.000736226
ENSG00000279861	AC073548.1	AC073548.1	0.724167	5.54372	0.000246389	0.00251368
ENSG00000257764	AC020656.1	AC020656.1	0.724137	8.52261	0.0013269	0.0100198
ENSG00000179912	R3HDM2	R3HDM2	0.72354	6.92581	0.000228392	0.00236248
ENSG00000151466	SCLT1	SCLT1	0.723319	6.19651	0.00211131	0.0143466
ENSG00000137814	HAUS2	HAUS2	0.722971	4.82691	0.0101534	0.0480576
ENSG00000279700	AC131212.2	AC131212.2	0.722925	3.24591	0.00363404	0.0217821
ENSG00000123728	RAP2C	RAP2C	0.722116	6.07829	0.00321484	0.0199057
ENSG00000006576	PHTF2	PHTF2	0.719433	5.41107	0.00886807	0.0436804
ENSG00000140941	MAP1LC3B	MAP1LC3B	0.718638	9.16934	6.69323e-05	0.000828866
ENSG00000053254	FOXN3	FOXN3	0.718105	5.60575	0.00303824	0.0190367
ENSG00000256060	TRAPPC2B	TRAPPC2B	0.717756	3.74059	0.00144782	0.0107779
ENSG00000134108	ARL8B	ARL8B	0.71704	7.32557	0.000117767	0.00136402
ENSG00000118515	SGK1	SGK1	0.715926	8.4687	0.00130263	0.00990303
ENSG00000114023	FAM162A	FAM162A	0.714512	6.32079	0.00214867	0.0145261
ENSG00000172428	COPS9	COPS9	0.713467	8.82689	0.00013416	0.00151599
ENSG00000117868	ESYT2	ESYT2	0.712685	5.63381	0.000505617	0.00458784
ENSG00000131174	COX7B	COX7B	0.712183	9.70678	2.51981e-05	0.000355028
ENSG00000164776	PHKG1	PHKG1	0.710816	4.58187	0.00153753	0.0112962
ENSG00000213639	PPP1CB	PPP1CB	0.710105	7.3501	0.000136453	0.00153778
ENSG00000137073	UBAP2	UBAP2	0.70908	4.92609	0.00409531	0.0239232
ENSG00000035681	NSMAF	NSMAF	0.709032	5.86011	0.00990367	0.0470738
ENSG00000198517	MAFK	MAFK	0.707577	5.18959	0.000867024	0.00714297
ENSG00000123130	ACOT9	ACOT9	0.707258	6.76693	0.000160334	0.0017711
ENSG00000189266	PNRC2	PNRC2	0.707241	7.53686	0.000455881	0.00421918
ENSG00000164111	ANXA5	ANXA5	0.706347	9.94726	7.11233e-05	0.000869825
ENSG00000188542	DUSP28	DUSP28	0.706084	4.94612	0.00131798	0.00998117
ENSG00000134109	EDEM1	EDEM1	0.705308	5.87962	0.00653987	0.0344305
ENSG00000125746	EML2	EML2	0.704241	3.37932	0.00536148	0.0296122
ENSG00000169627	BOLA2B	BOLA2B	0.703833	6.42867	0.000764092	0.0064849
ENSG00000235453	SMIM27	SMIM27	0.703761	5.24223	0.000614793	0.00539812
ENSG00000136527	TRA2B	TRA2B	0.703491	8.30306	0.00294098	0.0186499
ENSG00000170791	CHCHD7	CHCHD7	0.703345	6.565	0.0011937	0.00920817
ENSG00000152404	CWF19L2	CWF19L2	0.703116	5.39393	0.00350306	0.0212722
ENSG00000198964	SGMS1	SGMS1	0.703028	6.06114	0.00936226	0.0452351
ENSG00000165169	DYNLT3	DYNLT3	0.703008	4.50933	0.00757688	0.0387755
ENSG00000134333	LDHA	LDHA	0.702543	9.04272	7.18413e-05	0.000877244
ENSG00000060558	GNA15	GNA15	0.701385	6.21938	0.00251977	0.0164695
ENSG00000129667	RHBDF2	RHBDF2	0.701148	6.41015	0.000839048	0.00696348
ENSG00000205544	TMEM256	TMEM256	0.700918	7.76774	0.000260755	0.00263296
ENSG00000138119	MYOF	MYOF	0.697496	5.40907	0.0019093	0.0133076
ENSG00000227825	SLC9A7P1	SLC9A7P1	0.697079	5.12768	0.00608394	0.0326189
ENSG00000220205	VAMP2	VAMP2	0.69595	5.8261	0.000513279	0.00464132
ENSG00000166401	SERPINB8	SERPINB8	0.695253	6.01752	0.007708	0.0393698
ENSG00000196873	CBWD3	CBWD3	0.69501	6.35114	0.00213423	0.0144657
ENSG00000167613	LAIR1	LAIR1	0.694651	7.20501	0.000322268	0.00314911
ENSG00000164758	MED30	MED30	0.690445	6.42729	0.000444234	0.00412593
ENSG00000173457	PPP1R14B	PPP1R14B	0.688677	6.81266	0.000429954	0.00402654
ENSG00000109756	RAPGEF2	RAPGEF2	0.687924	5.5912	0.0016239	0.0117554
ENSG00000123562	MORF4L2	MORF4L2	0.687254	6.33807	0.000200572	0.00213185
ENSG00000184384	MAML2	MAML2	0.68692	6.35521	0.00467916	0.0266472
ENSG00000163602	RYBP	RYBP	0.686759	6.95104	0.000367181	0.00350961
ENSG00000184014	DENND5A	DENND5A	0.686264	6.99193	0.00508791	0.0284259
ENSG00000243147	MRPL33	MRPL33	0.686151	7.35276	0.00219024	0.0147313
ENSG00000116604	MEF2D	MEF2D	0.682773	6.12515	0.000862045	0.00710939
ENSG00000183735	TBK1	TBK1	0.682309	5.75869	0.00064954	0.00565905
ENSG00000214046	SMIM7	SMIM7	0.681184	5.62275	0.00137466	0.0102917
ENSG00000081189	MEF2C	MEF2C	0.679871	7.54618	0.0101841	0.0480874
ENSG00000197498	RPF2	RPF2	0.677539	5.25409	0.00157781	0.0115277
ENSG00000197070	ARRDC1	ARRDC1	0.677487	5.95548	0.000839001	0.00696348
ENSG00000081870	HSPB11	HSPB11	0.674922	6.08842	0.00548175	0.0301286
ENSG00000176731	RBIS	RBIS	0.673389	8.72835	0.0004775	0.00439345
ENSG00000119705	SLIRP	SLIRP	0.671775	8.06334	0.000163387	0.00179726
ENSG00000169032	MAP2K1	MAP2K1	0.671515	7.38585	0.000296811	0.0029331
ENSG00000225434	LINC01504	LINC01504	0.670866	3.65357	0.00826448	0.0416376
ENSG00000127922	SEM1	SEM1	0.670538	8.76905	0.000176951	0.00191965
ENSG00000116741	RGS2	RGS2	0.670234	9.85786	0.00384766	0.0227168
ENSG00000126653	NSRP1	NSRP1	0.669679	6.76064	0.000569114	0.00507052
ENSG00000164405	UQCRQ	UQCRQ	0.669463	8.89876	0.00015756	0.00174535
ENSG00000115138	POMC	POMC	0.66946	5.07044	0.00863663	0.0427812
ENSG00000273136	NBPF26	NBPF26	0.66595	3.91228	0.0063008	0.033539
ENSG00000117450	PRDX1	PRDX1	0.665241	9.07651	0.00108197	0.0085216
ENSG00000134590	RTL8C	RTL8C	0.664302	5.72835	0.000713168	0.00612531
ENSG00000272667	AC012306.2	AC012306.2	0.664291	3.55583	0.00672598	0.0351285
ENSG00000102172	SMS	SMS	0.664023	7.52558	0.000441102	0.00411486
ENSG00000168769	TET2	TET2	0.66223	7.7142	0.00114417	0.00888708
ENSG00000163463	KRTCAP2	KRTCAP2	0.662165	8.25439	0.000189609	0.00204011
ENSG00000134825	TMEM258	TMEM258	0.661581	9.17792	0.000443416	0.00412593
ENSG00000234506	LINC01506	LINC01506	0.661042	4.91414	0.00332363	0.0204002
ENSG00000147996	CBWD5	CBWD5	0.660522	6.19245	0.000854636	0.00706308
ENSG00000113742	CPEB4	CPEB4	0.660141	7.00888	0.000958524	0.00773497
ENSG00000109572	CLCN3	CLCN3	0.659603	5.48099	0.0102192	0.048176
ENSG00000100380	ST13	ST13	0.659452	7.93015	0.000441475	0.00411486
ENSG00000100028	SNRPD3	SNRPD3	0.659121	7.96812	0.000162689	0.00179241
ENSG00000203667	COX20	COX20	0.65907	6.56525	0.00073808	0.00631175
ENSG00000125835	SNRPB	SNRPB	0.658617	8.46614	0.000201281	0.0021365
ENSG00000138621	PPCDC	PPCDC	0.658225	5.40595	0.00416227	0.0242292
ENSG00000125356	NDUFA1	NDUFA1	0.657227	9.59022	0.000176121	0.00191328
ENSG00000226067	LINC00623	LINC00623	0.6562	3.53169	0.00783129	0.0398445
ENSG00000184752	NDUFA12	NDUFA12	0.656058	7.91621	0.000995085	0.00794857
ENSG00000141425	RPRD1A	RPRD1A	0.654233	4.36407	0.00304478	0.0190625
ENSG00000169045	HNRNPH1	HNRNPH1	0.65361	8.75727	0.000979742	0.00788197
ENSG00000149480	MTA2	MTA2	0.653482	4.33837	0.0014551	0.0108117
ENSG00000127184	COX7C	COX7C	0.653388	10.8837	0.000287381	0.00285784
ENSG00000170270	GON7	GON7	0.652239	4.65505	0.00346774	0.0211229
ENSG00000184983	NDUFA6	NDUFA6	0.651401	7.70612	0.00080943	0.00678921
ENSG00000116337	AMPD2	AMPD2	0.650521	6.79032	0.000369623	0.00352672
ENSG00000243926	TIPARP-AS1	TIPARP-AS1	0.649939	4.80671	0.00173511	0.0123953
ENSG00000089737	DDX24	DDX24	0.649911	6.67217	0.00599928	0.0322528
ENSG00000255073	ZFP91-CNTF	ZFP91-CNTF	0.647852	4.04096	0.00373786	0.0222352
ENSG00000174891	RSRC1	RSRC1	0.646817	6.2547	0.00260199	0.016911
ENSG00000100284	TOM1	TOM1	0.646072	6.81719	0.000504963	0.00458719
ENSG00000225889	AC012368.1	AC012368.1	0.645932	6.11216	0.00795378	0.0403894
ENSG00000110651	CD81	CD81	0.645413	6.95146	0.00438935	0.0252924
ENSG00000163938	GNL3	GNL3	0.644561	6.17253	0.00359296	0.0216234
ENSG00000175768	TOMM5	TOMM5	0.644311	6.81617	0.00317833	0.0197361
ENSG00000102119	EMD	EMD	0.643771	6.37915	0.00234582	0.0154956
ENSG00000082397	EPB41L3	EPB41L3	0.643243	6.49773	0.00185644	0.0130493
ENSG00000233016	SNHG7	SNHG7	0.642463	7.3374	0.00421399	0.024476
ENSG00000173272	MZT2A	MZT2A	0.641407	6.26845	0.00263824	0.0170878
ENSG00000169641	LUZP1	LUZP1	0.640698	5.24629	0.00631156	0.0335424
ENSG00000121741	ZMYM2	ZMYM2	0.640583	6.18051	0.0035206	0.0213203
ENSG00000184216	IRAK1	IRAK1	0.639159	6.9451	0.0042522	0.0246072
ENSG00000204574	ABCF1	ABCF1	0.637765	6.01627	0.00590226	0.0319054
ENSG00000185043	CIB1	CIB1	0.636838	8.37844	0.000348801	0.00337488
ENSG00000205571	SMN2	SMN2	0.632828	5.18912	0.00355154	0.0214509
ENSG00000007392	LUC7L	LUC7L	0.632806	5.64085	0.00847847	0.0423171
ENSG00000245910	SNHG6	SNHG6	0.629664	9.45849	0.00186268	0.013073
ENSG00000168264	IRF2BP2	IRF2BP2	0.629259	8.05027	0.00193042	0.0134311
ENSG00000112081	SRSF3	SRSF3	0.628167	9.36921	0.00194349	0.0134775
ENSG00000186660	ZFP91	ZFP91	0.627753	6.0973	0.000937577	0.00763636
ENSG00000138463	SLC49A4	SLC49A4	0.626803	5.37677	0.00443734	0.0254912
ENSG00000152229	PSTPIP2	PSTPIP2	0.626247	7.1915	0.000894282	0.00733684
ENSG00000066379	ZNRD1	ZNRD1	0.625953	6.67602	0.00341477	0.0208486
ENSG00000124356	STAMBP	STAMBP	0.624984	5.45869	0.00291345	0.018535
ENSG00000221914	PPP2R2A	PPP2R2A	0.623908	6.14693	0.00773433	0.0394787
ENSG00000127948	POR	POR	0.622783	6.17419	0.00366128	0.0218622
ENSG00000288044	AL096870.10	AL096870.10	0.622114	5.52508	0.0042264	0.0245096
ENSG00000120686	UFM1	UFM1	0.621041	7.21531	0.000858182	0.00708495
ENSG00000120690	ELF1	ELF1	0.620814	8.53035	0.00183487	0.0129609
ENSG00000133731	IMPA1	IMPA1	0.620071	4.63048	0.00998542	0.0473766
ENSG00000135821	GLUL	GLUL	0.619951	9.64555	0.00131249	0.00995877
ENSG00000179344	HLA-DQB1	HLA-DQB1	0.61724	9.63878	0.00353311	0.0213723
ENSG00000067533	RRP15	RRP15	0.616555	4.7321	0.00599264	0.0322528
ENSG00000179085	DPM3	DPM3	0.616453	6.85954	0.0012469	0.00954384
ENSG00000126524	SBDS	SBDS	0.615824	6.69974	0.0014504	0.010787
ENSG00000116815	CD58	CD58	0.615487	6.0867	0.00184397	0.0129902
ENSG00000162076	FLYWCH2	FLYWCH2	0.613869	5.38367	0.00386307	0.0227907
ENSG00000120688	WBP4	WBP4	0.613725	6.04129	0.00481267	0.0271912
ENSG00000140365	COMMD4	COMMD4	0.613586	5.42326	0.00215963	0.0145627
ENSG00000143753	DEGS1	DEGS1	0.613467	6.39502	0.00119776	0.00921987
ENSG00000272831	AC027644.3	AC027644.3	0.613183	5.87487	0.00756055	0.0387171
ENSG00000265241	RBM8A	RBM8A	0.613025	8.30899	0.000891746	0.00732366
ENSG00000113391	FAM172A	FAM172A	0.611358	4.95954	0.00512449	0.0285435
ENSG00000105185	PDCD5	PDCD5	0.611202	7.5131	0.0025744	0.0167847
ENSG00000143933	CALM2	CALM2	0.610954	10.2033	0.00077533	0.00655203
ENSG00000075790	BCAP29	BCAP29	0.609849	4.98514	0.00925536	0.0449143
ENSG00000171735	CAMTA1	CAMTA1	0.609017	6.43601	0.00155014	0.0113677
ENSG00000135269	TES	TES	0.607161	7.32583	0.0020239	0.0139216
ENSG00000256053	APOPT1	APOPT1	0.607127	4.68528	0.0041618	0.0242292
ENSG00000122884	P4HA1	P4HA1	0.606915	5.59636	0.0050398	0.0282516
ENSG00000170634	ACYP2	ACYP2	0.605683	5.11852	0.00348278	0.0211981
ENSG00000185215	TNFAIP2	TNFAIP2	0.605662	9.00232	0.00361212	0.0216704
ENSG00000162385	MAGOH	MAGOH	0.605113	7.68287	0.00202575	0.0139222
ENSG00000126267	COX6B1	COX6B1	0.604271	10.3001	0.00033375	0.00324521
ENSG00000169241	SLC50A1	SLC50A1	0.60399	4.58595	0.00823916	0.0415439
ENSG00000187231	SESTD1	SESTD1	0.603205	6.37389	0.010427	0.04897
ENSG00000266472	MRPS21	MRPS21	0.603093	8.22502	0.000545299	0.00488299
ENSG00000265118	AC134669.1	AC134669.1	0.598868	4.22835	0.0107054	0.0498476
ENSG00000164919	COX6C	COX6C	0.598037	9.79428	0.000577321	0.00513204
ENSG00000131495	NDUFA2	NDUFA2	0.597743	8.38505	0.000688684	0.00595398
ENSG00000079332	SAR1A	SAR1A	0.597641	6.55598	0.00580629	0.0314947
ENSG00000100142	POLR2F	POLR2F	0.59727	6.84688	0.00363871	0.0217935
ENSG00000114439	BBX	BBX	0.596781	6.72095	0.00324596	0.020066
ENSG00000172262	ZNF131	ZNF131	0.596454	5.0219	0.00540713	0.0298225
ENSG00000109270	LAMTOR3	LAMTOR3	0.59629	6.07575	0.00624923	0.0333688
ENSG00000271614	ATP2B1-AS1	ATP2B1-AS1	0.595975	10.0177	0.0082087	0.0414168
ENSG00000166595	CIAO2B	CIAO2B	0.595683	7.96064	0.000778693	0.00656636
ENSG00000119048	UBE2B	UBE2B	0.59547	8.51497	0.00171997	0.0123262
ENSG00000164032	H2AFZ	H2AFZ	0.594148	8.98517	0.00225885	0.0151153
ENSG00000160932	LY6E	LY6E	0.593322	6.96041	0.00847578	0.0423171
ENSG00000256594	AC010186.2	AC010186.2	0.592907	3.97661	0.00994703	0.0472229
ENSG00000177463	NR2C2	NR2C2	0.59176	3.64495	0.00818829	0.0413824
ENSG00000100664	EIF5	EIF5	0.590139	8.7574	0.00228818	0.0152387
ENSG00000182831	C16orf72	C16orf72	0.587354	6.59129	0.00949979	0.0456867
ENSG00000124177	CHD6	CHD6	0.587127	5.91559	0.00404155	0.0236424
ENSG00000136560	TANK	TANK	0.586906	7.25824	0.00703997	0.0363528
ENSG00000152795	HNRNPDL	HNRNPDL	0.585558	9.38	0.00119017	0.00918994
ENSG00000100997	ABHD12	ABHD12	0.585295	3.84177	0.00860118	0.042767
ENSG00000092199	HNRNPC	HNRNPC	0.584828	8.83577	0.00159135	0.011584
ENSG00000198258	UBL5	UBL5	0.583506	9.79705	0.000699478	0.00601429
ENSG00000086589	RBM22	RBM22	0.581127	6.45421	0.00213904	0.0144859
ENSG00000225470	JPX	JPX	0.580326	5.28823	0.00718021	0.0369858
ENSG00000149531	FRG1BP	FRG1BP	0.579307	5.80516	0.00977926	0.0466204
ENSG00000131368	MRPS25	MRPS25	0.575688	5.26558	0.00598232	0.0322276
ENSG00000154781	CCDC174	CCDC174	0.575666	5.96951	0.0103422	0.0486589
ENSG00000152926	ZNF117	ZNF117	0.575645	4.1493	0.00661316	0.0346772
ENSG00000176340	COX8A	COX8A	0.574476	9.16081	0.00106883	0.008435
ENSG00000153774	CFDP1	CFDP1	0.573933	6.36347	0.00237328	0.0156287
ENSG00000141551	CSNK1D	CSNK1D	0.573751	5.3931	0.0104833	0.0491467
ENSG00000120963	ZNF706	ZNF706	0.571914	8.26276	0.00554222	0.0303339
ENSG00000137575	SDCBP	SDCBP	0.570451	9.88789	0.00156855	0.0114706
ENSG00000160584	SIK3	SIK3	0.57022	6.35042	0.00511433	0.028507
ENSG00000100442	FKBP3	FKBP3	0.570083	6.67601	0.00181668	0.0128671
ENSG00000230989	HSBP1	HSBP1	0.56928	8.48843	0.0047725	0.0269836
ENSG00000268975	MIA-RAB4B	MIA-RAB4B	0.568457	4.00586	0.00725349	0.0373145
ENSG00000107372	ZFAND5	ZFAND5	0.567784	10.3919	0.00974745	0.0464997
ENSG00000112531	QKI	QKI	0.567597	8.50881	0.00278868	0.0179295
ENSG00000125971	DYNLRB1	DYNLRB1	0.567339	8.08123	0.00200401	0.013821
ENSG00000162961	DPY30	DPY30	0.567068	5.98706	0.00649654	0.0342711
ENSG00000223482	NUTM2A-AS1	NUTM2A-AS1	0.567027	5.74337	0.00333725	0.0204546
ENSG00000113013	HSPA9	HSPA9	0.56551	7.32019	0.0034314	0.0209339
ENSG00000070785	EIF2B3	EIF2B3	0.564014	4.3549	0.00777201	0.0396453
ENSG00000111252	SH2B3	SH2B3	0.562904	6.88368	0.00472664	0.0268206
ENSG00000164924	YWHAZ	YWHAZ	0.562848	8.89228	0.0014233	0.0106255
ENSG00000177700	POLR2L	POLR2L	0.56071	9.20806	0.00332215	0.0204002
ENSG00000076928	ARHGEF1	ARHGEF1	0.560598	6.70872	0.0107296	0.0499152
ENSG00000167797	CDK2AP2	CDK2AP2	0.560592	6.51611	0.00471568	0.0267777
ENSG00000060971	ACAA1	ACAA1	0.560328	7.44235	0.00920102	0.0448992
ENSG00000102030	NAA10	NAA10	0.558141	6.29243	0.00326257	0.0201379
ENSG00000138964	PARVG	PARVG	0.557771	6.87175	0.0036984	0.0220504
ENSG00000164346	NSA2	NSA2	0.557351	8.81595	0.00185167	0.0130329
ENSG00000106617	PRKAG2	PRKAG2	0.556335	7.53053	0.00284261	0.0182167
ENSG00000109670	FBXW7	FBXW7	0.555503	6.41435	0.00656824	0.0345568
ENSG00000172062	SMN1	SMN1	0.555096	5.18672	0.0105194	0.0492282
ENSG00000115486	GGCX	GGCX	0.553435	4.90169	0.00842666	0.0421922
ENSG00000083799	CYLD	CYLD	0.552234	6.34219	0.00483466	0.0272763
ENSG00000156467	UQCRB	UQCRB	0.551481	10.7813	0.00173169	0.0123953
ENSG00000175334	BANF1	BANF1	0.550906	7.67633	0.00360871	0.0216704
ENSG00000116251	RPL22	RPL22	0.550481	12.0238	0.00221094	0.0148325
ENSG00000117616	RSRP1	RSRP1	0.547275	7.96868	0.00564608	0.0308167
ENSG00000181625	SLX1B	SLX1B	0.546325	7.08223	0.00295837	0.0186936
ENSG00000243716	NPIPB5	NPIPB5	0.546182	4.86069	0.00954618	0.045817
ENSG00000132207	SLX1A	SLX1A	0.54481	7.0793	0.00317822	0.0197361
ENSG00000244754	N4BP2L2	N4BP2L2	0.544801	7.09097	0.0063159	0.0335428
ENSG00000120533	ENY2	ENY2	0.54439	8.92428	0.00332578	0.0204002
ENSG00000008128	CDK11A	CDK11A	0.544249	6.51547	0.00329794	0.0203244
ENSG00000028137	TNFRSF1B	TNFRSF1B	0.543368	9.45853	0.00317406	0.0197361
ENSG00000105483	CARD8	CARD8	0.543255	6.72558	0.00382483	0.0226159
ENSG00000122565	CBX3	CBX3	0.540955	8.58314	0.00230394	0.0152743
ENSG00000065518	NDUFB4	NDUFB4	0.539997	8.79844	0.00211301	0.0143466
ENSG00000196976	LAGE3	LAGE3	0.539336	5.71493	0.00629256	0.033539
ENSG00000063322	MED29	MED29	0.538358	6.24169	0.00574557	0.0312514
ENSG00000259865	AL390728.6	AL390728.6	0.538078	5.37019	0.00856245	0.0426282
ENSG00000197555	SIPA1L1	SIPA1L1	0.537611	6.25482	0.00700238	0.0362119
ENSG00000139726	DENR	DENR	0.53719	6.61797	0.00532476	0.0294507
ENSG00000166797	CIAO2A	CIAO2A	0.535625	6.8191	0.00558867	0.0305457
ENSG00000122958	VPS26A	VPS26A	0.534498	6.38727	0.00770255	0.0393675
ENSG00000125743	SNRPD2	SNRPD2	0.533992	8.42091	0.00275517	0.017743
ENSG00000167578	RAB4B	RAB4B	0.532713	4.31141	0.00921229	0.0449095
ENSG00000186432	KPNA4	KPNA4	0.532301	7.13222	0.00497298	0.0279367
ENSG00000089280	FUS	FUS	0.532192	8.77751	0.00597664	0.0322276
ENSG00000142599	RERE	RERE	0.530991	5.83967	0.0098857	0.0470168
ENSG00000144674	GOLGA4	GOLGA4	0.529115	6.03938	0.00558136	0.0305269
ENSG00000148834	GSTO1	GSTO1	0.526636	9.32699	0.00594933	0.0321378
ENSG00000171530	TBCA	TBCA	0.526399	9.00464	0.00238365	0.0156839
ENSG00000165233	CARD19	CARD19	0.525279	6.95459	0.00953449	0.0457888
ENSG00000168610	STAT3	STAT3	0.521872	7.37147	0.00658426	0.0345948
ENSG00000140319	SRP14	SRP14	0.52077	10.1558	0.00262747	0.017032
ENSG00000143119	CD53	CD53	0.519337	9.21065	0.00382796	0.0226174
ENSG00000139372	TDG	TDG	0.517598	6.11538	0.00806902	0.0408692
ENSG00000120802	TMPO	TMPO	0.514556	7.83777	0.00628742	0.033539
ENSG00000160633	SAFB	SAFB	0.513208	6.68283	0.00901742	0.0442004
ENSG00000088986	DYNLL1	DYNLL1	0.512522	9.26916	0.00454178	0.0259964
ENSG00000204397	CARD16	CARD16	0.511775	9.67642	0.00332409	0.0204002
ENSG00000135390	ATP5MC2	ATP5MC2	0.511461	10.7978	0.00231542	0.0153117
ENSG00000050393	MCUR1	MCUR1	0.511448	5.48638	0.0103351	0.0486547
ENSG00000139343	SNRPF	SNRPF	0.511005	8.23626	0.00373075	0.0222096
ENSG00000250479	CHCHD10	CHCHD10	0.510786	8.69125	0.00663917	0.034769
ENSG00000123066	MED13L	MED13L	0.50912	5.96814	0.00791994	0.0402435
ENSG00000090273	NUDC	NUDC	0.508745	7.17692	0.00855607	0.0426234
ENSG00000125354	2006-09-01	2006-09-01	0.508368	5.90627	0.0106607	0.0497136
ENSG00000185088	RPS27L	RPS27L	0.508037	8.3979	0.00946531	0.0455677
ENSG00000173436	MICOS10	MICOS10	0.505568	8.86364	0.00641294	0.0338982
ENSG00000275895	U2AF1L5	U2AF1L5	0.502999	7.81541	0.00517903	0.0287578
ENSG00000015285	WAS	WAS	0.501344	8.61303	0.005982	0.0322276
ENSG00000066336	SPI1	SPI1	0.501331	9.72785	0.00746981	0.0382773
ENSG00000120742	SERP1	SERP1	0.500873	10.7934	0.00422661	0.0245096
ENSG00000071859	FAM50A	FAM50A	0.500418	7.44487	0.00746735	0.0382773
ENSG00000112249	ASCC3	ASCC3	0.499039	5.84412	0.0101975	0.0481218
ENSG00000086666	ZFAND6	ZFAND6	0.490763	7.10219	0.010448	0.0490395
ENSG00000100410	PHF5A	PHF5A	0.487449	6.41255	0.00972694	0.0464299
ENSG00000109536	FRG1	FRG1	0.48659	7.43217	0.00884218	0.0436074
ENSG00000178127	NDUFV2	NDUFV2	0.485008	7.53842	0.00901855	0.0442004
ENSG00000089327	FXYD5	FXYD5	0.484502	9.69347	0.00542891	0.0298799
ENSG00000182087	TMEM259	TMEM259	0.481791	6.9635	0.00964853	0.0461676
ENSG00000172590	MRPL52	MRPL52	0.48052	8.05339	0.00827347	0.0416376
ENSG00000215301	DDX3X	DDX3X	0.477341	8.74899	0.0100985	0.0478552
ENSG00000138385	SSB	SSB	0.470606	7.94231	0.0106135	0.0495508
ENSG00000120675	DNAJC15	DNAJC15	0.467405	8.05954	0.0105083	0.0492061
ENSG00000138668	HNRNPD	HNRNPD	0.460317	8.60557	0.00921634	0.0449095
ENSG00000070831	CDC42	CDC42	0.459787	10.2073	0.00972507	0.0464299
ENSG00000130770	ATP5IF1	ATP5IF1	0.449821	8.31128	0.0098051	0.0466898
ENSG00000106066	CPVL	CPVL	-0.47802	9.38311	0.00863283	0.0427812
ENSG00000160593	JAML	JAML	-0.481735	9.0419	0.00868159	0.0429499
ENSG00000009307	CSDE1	CSDE1	-0.488606	8.8145	0.00864741	0.0428077
ENSG00000121064	SCPEP1	SCPEP1	-0.492972	8.31436	0.00924648	0.0449143
ENSG00000164463	CREBRF	CREBRF	-0.510865	7.60335	0.00801669	0.0406564
ENSG00000134905	CARS2	CARS2	-0.515394	6.98085	0.010661	0.0497136
ENSG00000152291	TGOLN2	TGOLN2	-0.51637	8.13369	0.00795979	0.0403939
ENSG00000100596	SPTLC2	SPTLC2	-0.516961	8.30489	0.00738299	0.0379311
ENSG00000132424	PNISR	PNISR	-0.523123	8.66183	0.00928183	0.0449592
ENSG00000142347	MYO1F	MYO1F	-0.530325	8.87747	0.00459732	0.0262571
ENSG00000100129	EIF3L	EIF3L	-0.534755	9.11817	0.00563007	0.0307507
ENSG00000140368	PSTPIP1	PSTPIP1	-0.536987	7.62742	0.00924192	0.0449143
ENSG00000121858	TNFSF10	TNFSF10	-0.541442	8.17473	0.00928086	0.0449592
ENSG00000130429	ARPC1B	ARPC1B	-0.543829	11.1037	0.00328934	0.0202873
ENSG00000101347	SAMHD1	SAMHD1	-0.547343	8.93845	0.00401194	0.0235279
ENSG00000143376	SNX27	SNX27	-0.548273	7.354	0.00529991	0.0293545
ENSG00000156052	GNAQ	GNAQ	-0.548724	7.94888	0.00473587	0.0268343
ENSG00000163349	HIPK1	HIPK1	-0.549862	6.77381	0.00679439	0.0354154
ENSG00000198771	RCSD1	RCSD1	-0.549892	7.92787	0.00889286	0.0437477
ENSG00000136628	EPRS	EPRS	-0.555962	6.34917	0.00819826	0.0413907
ENSG00000180011	ZADH2	ZADH2	-0.556164	5.71108	0.0105422	0.049276
ENSG00000198876	DCAF12	DCAF12	-0.558257	5.52232	0.0101831	0.0480874
ENSG00000198492	YTHDF2	YTHDF2	-0.559245	6.76782	0.00585894	0.0317366
ENSG00000134463	ECHDC3	ECHDC3	-0.560961	5.76634	0.0105085	0.0492061
ENSG00000182670	TTC3	TTC3	-0.563727	7.03192	0.00631015	0.0335424
ENSG00000278311	GGNBP2	GGNBP2	-0.565746	7.81556	0.00721756	0.0371539
ENSG00000082074	FYB1	FYB1	-0.566614	9.76996	0.00130705	0.00992703
ENSG00000176853	FAM91A1	FAM91A1	-0.568187	6.65905	0.00843984	0.0422314
ENSG00000103479	RBL2	RBL2	-0.569382	6.28909	0.00863257	0.0427812
ENSG00000123064	DDX54	DDX54	-0.570054	6.15458	0.00916973	0.0447742
ENSG00000131269	ABCB7	ABCB7	-0.575421	5.52973	0.00907524	0.044423
ENSG00000148396	SEC16A	SEC16A	-0.57575	5.69464	0.00780135	0.0397435
ENSG00000111144	LTA4H	LTA4H	-0.575899	8.62486	0.0060228	0.0323571
ENSG00000049860	HEXB	HEXB	-0.576426	7.28007	0.00760898	0.0389145
ENSG00000132463	GRSF1	GRSF1	-0.576483	6.71158	0.00698286	0.0361347
ENSG00000169221	TBC1D10B	TBC1D10B	-0.576616	5.61733	0.0068606	0.0356425
ENSG00000231925	TAPBP	TAPBP	-0.57718	7.99711	0.00509616	0.0284259
ENSG00000188895	MSL1	MSL1	-0.58035	6.37001	0.00859526	0.0427646
ENSG00000166170	BAG5	BAG5	-0.583473	5.74217	0.00880786	0.0434654
ENSG00000181481	RNF135	RNF135	-0.587885	6.4169	0.00409757	0.0239232
ENSG00000274536	AL034397.3	AL034397.3	-0.58815	7.20657	0.0106024	0.0495281
ENSG00000182446	NPLOC4	NPLOC4	-0.589608	5.86136	0.00739522	0.0379692
ENSG00000066027	PPP2R5A	PPP2R5A	-0.590247	6.68467	0.00307742	0.0191906
ENSG00000171475	WIPF2	WIPF2	-0.591511	5.94439	0.00986241	0.0469343
ENSG00000134644	PUM1	PUM1	-0.592092	7.01029	0.00390593	0.0229747
ENSG00000164062	APEH	APEH	-0.592206	5.64271	0.00992628	0.0471528
ENSG00000188811	NHLRC3	NHLRC3	-0.593315	5.64818	0.00577432	0.0313645
ENSG00000137767	SQOR	SQOR	-0.594303	7.78109	0.00839353	0.0420798
ENSG00000125827	TMX4	TMX4	-0.594361	7.04377	0.00552141	0.030241
ENSG00000196576	PLXNB2	PLXNB2	-0.59467	7.24339	0.00950163	0.0456867
ENSG00000104205	SGK3	SGK3	-0.595726	6.54696	0.00911912	0.0445824
ENSG00000143641	GALNT2	GALNT2	-0.598251	5.95885	0.00534701	0.029553
ENSG00000106348	IMPDH1	IMPDH1	-0.599556	7.33161	0.00272733	0.0175781
ENSG00000213445	SIPA1	SIPA1	-0.600389	6.87513	0.00253457	0.0165524
ENSG00000272211	AC114760.2	AC114760.2	-0.600652	6.71469	0.0066034	0.0346491
ENSG00000159658	EFCAB14	EFCAB14	-0.601232	6.59589	0.00585286	0.0317255
ENSG00000071967	CYBRD1	CYBRD1	-0.602026	5.46886	0.00640902	0.0338982
ENSG00000106948	AKNA	AKNA	-0.605834	7.24595	0.00206488	0.0141417
ENSG00000166855	CLPX	CLPX	-0.607069	5.47955	0.00588904	0.0318777
ENSG00000168538	TRAPPC11	TRAPPC11	-0.607373	5.34068	0.00828226	0.0416546
ENSG00000162607	USP1	USP1	-0.607468	5.86775	0.0058988	0.0319054
ENSG00000184584	TMEM173	TMEM173	-0.608339	6.8221	0.00550224	0.0301941
ENSG00000171777	RASGRP4	RASGRP4	-0.608356	5.96935	0.00505187	0.028279
ENSG00000139697	SBNO1	SBNO1	-0.60866	6.32711	0.00474403	0.0268612
ENSG00000007237	AC005747.1	AC005747.1	-0.609206	7.59088	0.00781513	0.0397879
ENSG00000141905	NFIC	NFIC	-0.610516	6.68482	0.0055177	0.030241
ENSG00000227057	WDR46	WDR46	-0.611822	5.63577	0.00518123	0.0287578
ENSG00000011275	RNF216	RNF216	-0.615431	5.87166	0.00435026	0.0251192
ENSG00000116977	LGALS8	LGALS8	-0.616304	6.56261	0.00364592	0.0218035
ENSG00000169021	UQCRFS1	UQCRFS1	-0.616527	8.00653	0.00216472	0.0145845
ENSG00000152234	ATP5F1A	ATP5F1A	-0.616614	8.48315	0.000677638	0.00587784
ENSG00000197548	ATG7	ATG7	-0.619623	5.91057	0.00862405	0.0427812
ENSG00000117505	DR1	DR1	-0.619711	6.53919	0.00219981	0.0147704
ENSG00000137075	RNF38	RNF38	-0.620036	5.52707	0.0094178	0.0453667
ENSG00000213676	ATF6B	ATF6B	-0.624593	5.96974	0.00827359	0.0416376
ENSG00000136731	UGGT1	UGGT1	-0.624666	5.43028	0.00671757	0.0351079
ENSG00000067992	PDK3	PDK3	-0.625141	5.37123	0.00531496	0.0294172
ENSG00000132155	RAF1	RAF1	-0.62573	6.12617	0.00542246	0.0298799
ENSG00000184743	ATL3	ATL3	-0.625918	6.03732	0.00502546	0.0281912
ENSG00000154832	CXXC1	CXXC1	-0.627354	5.19054	0.00873033	0.0431098
ENSG00000121680	PEX16	PEX16	-0.628544	6.00053	0.0104765	0.0491442
ENSG00000181610	MRPS23	MRPS23	-0.631189	6.23774	0.00696281	0.0360889
ENSG00000076924	XAB2	XAB2	-0.632003	5.22301	0.0064281	0.0339555
ENSG00000213203	GIMAP1	GIMAP1	-0.63209	7.32104	0.00272302	0.0175647
ENSG00000273749	CYFIP1	CYFIP1	-0.633553	6.37765	0.0101194	0.0479258
ENSG00000169180	XPO6	XPO6	-0.633569	6.06377	0.00482502	0.0272415
ENSG00000211460	TSN	TSN	-0.6337	5.85333	0.00937929	0.0452351
ENSG00000147471	PLPBP	PLPBP	-0.634684	6.13179	0.00926114	0.0449143
ENSG00000188986	NELFB	NELFB	-0.634901	5.86746	0.0033932	0.0207652
ENSG00000135709	KIAA0513	KIAA0513	-0.635948	6.36132	0.00691082	0.0358562
ENSG00000132357	CARD6	CARD6	-0.636211	4.65119	0.00959775	0.0460052
ENSG00000071655	MBD3	MBD3	-0.640229	5.77215	0.00612884	0.0328149
ENSG00000223496	EXOSC6	EXOSC6	-0.641308	6.28603	0.00925591	0.0449143
ENSG00000172053	QARS	QARS	-0.642744	6.85501	0.00475827	0.0269225
ENSG00000165406	MARCH8	MARCH8	-0.644892	4.29472	0.00930875	0.0450619
ENSG00000163125	RPRD2	RPRD2	-0.648084	5.00354	0.00690992	0.0358562
ENSG00000138246	DNAJC13	DNAJC13	-0.648194	5.9853	0.00380009	0.0225203
ENSG00000145868	FBXO38	FBXO38	-0.648427	5.01419	0.00938382	0.0452351
ENSG00000118564	FBXL5	FBXL5	-0.649205	7.92771	0.0046995	0.0267334
ENSG00000104998	IL27RA	IL27RA	-0.651074	7.01952	0.00306733	0.0191581
ENSG00000148730	EIF4EBP2	EIF4EBP2	-0.651442	7.06373	0.00225723	0.0151153
ENSG00000101997	CCDC22	CCDC22	-0.652117	5.61809	0.00670194	0.0350494
ENSG00000123684	LPGAT1	LPGAT1	-0.652594	7.49186	0.00466089	0.0265816
ENSG00000134243	SORT1	SORT1	-0.653987	6.19393	0.00360968	0.0216704
ENSG00000103507	BCKDK	BCKDK	-0.65405	6.68017	0.00412412	0.0240426
ENSG00000221963	APOL6	APOL6	-0.65631	6.62506	0.00394808	0.0231707
ENSG00000141401	IMPA2	IMPA2	-0.656433	7.1336	0.00277536	0.0178585
ENSG00000165733	BMS1	BMS1	-0.657821	5.19821	0.00638338	0.03381
ENSG00000112561	TFEB	TFEB	-0.659029	6.16707	0.00169108	0.0121634
ENSG00000120708	TGFBI	TGFBI	-0.659385	8.43764	0.000744774	0.00636208
ENSG00000263001	GTF2I	GTF2I	-0.659523	6.42724	0.00282014	0.0181022
ENSG00000100056	ESS2	ESS2	-0.659692	4.25507	0.00962142	0.0460659
ENSG00000005700	IBTK	IBTK	-0.65987	5.52837	0.00898631	0.0441523
ENSG00000213699	SLC35F6	SLC35F6	-0.660584	4.54909	0.0085258	0.0424995
ENSG00000162639	HENMT1	HENMT1	-0.661466	3.9983	0.0106968	0.0498476
ENSG00000151292	CSNK1G3	CSNK1G3	-0.662724	5.44859	0.0029031	0.0184841
ENSG00000106261	ZKSCAN1	ZKSCAN1	-0.663124	6.17262	0.00912647	0.0445906
ENSG00000048028	USP28	USP28	-0.663195	4.49264	0.0103935	0.0488422
ENSG00000167323	STIM1	STIM1	-0.663509	5.12809	0.00550517	0.0301941
ENSG00000142544	CTU1	CTU1	-0.664581	5.27389	0.0037424	0.0222454
ENSG00000165275	TRMT10B	TRMT10B	-0.665089	4.59319	0.00680602	0.0354237
ENSG00000112576	CCND3	CCND3	-0.665323	7.91458	0.00505054	0.028279
ENSG00000108424	KPNB1	KPNB1	-0.665415	7.0587	0.00133846	0.0100781
ENSG00000185753	CXorf38	CXorf38	-0.666089	6.83764	0.00109637	0.0086178
ENSG00000115306	SPTBN1	SPTBN1	-0.66616	4.36227	0.00710573	0.0366501
ENSG00000136051	WASHC4	WASHC4	-0.666359	7.33561	0.000757021	0.00643182
ENSG00000284697	AC006511.5	AC006511.5	-0.666965	4.98205	0.00922933	0.0449143
ENSG00000100225	FBXO7	FBXO7	-0.667151	6.50812	0.00240286	0.0157445
ENSG00000142327	RNPEPL1	RNPEPL1	-0.667233	7.66471	0.00351893	0.0213203
ENSG00000149182	ARFGAP2	ARFGAP2	-0.667629	6.44332	0.00190725	0.0133051
ENSG00000143970	ASXL2	ASXL2	-0.66853	5.56635	0.00306734	0.0191581
ENSG00000076662	ICAM3	ICAM3	-0.668771	8.72191	0.00819137	0.0413824
ENSG00000168887	C2orf68	C2orf68	-0.669654	5.58582	0.00202872	0.0139304
ENSG00000172531	PPP1CA	PPP1CA	-0.66992	8.26127	0.0037946	0.0225047
ENSG00000115325	DOK1	DOK1	-0.670021	5.89682	0.001979	0.0136845
ENSG00000110876	SELPLG	SELPLG	-0.670102	7.42992	0.00635198	0.0337117
ENSG00000125637	PSD4	PSD4	-0.670152	5.07337	0.00704348	0.0363528
ENSG00000136630	HLX	HLX	-0.670173	5.93029	0.00303604	0.0190367
ENSG00000184992	BRI3BP	BRI3BP	-0.670508	5.65875	0.00229181	0.0152387
ENSG00000146083	RNF44	RNF44	-0.671138	6.01533	0.00193804	0.0134722
ENSG00000170385	SLC30A1	SLC30A1	-0.671781	5.61564	0.0063816	0.03381
ENSG00000106546	AHR	AHR	-0.671858	7.5088	0.00288732	0.0184134
ENSG00000160991	ORAI2	ORAI2	-0.671938	5.8602	0.00426643	0.0246714
ENSG00000185963	BICD2	BICD2	-0.674365	6.54951	0.00115812	0.00896885
ENSG00000089876	DHX32	DHX32	-0.674782	4.2871	0.0093236	0.0451028
ENSG00000160688	FLAD1	FLAD1	-0.675057	4.7847	0.00838812	0.0420795
ENSG00000089154	GCN1	GCN1	-0.675162	4.31679	0.0101698	0.0480874
ENSG00000158195	WASF2	WASF2	-0.675565	9.17106	0.00180262	0.0127905
ENSG00000106328	FSCN3	FSCN3	-0.675749	7.04225	0.000932168	0.00760803
ENSG00000175155	YPEL2	YPEL2	-0.675798	7.16209	0.00539125	0.0297558
ENSG00000126012	KDM5C	KDM5C	-0.676429	5.50634	0.00435488	0.0251275
ENSG00000182511	FES	FES	-0.676847	7.68678	0.00254697	0.0166197
ENSG00000132530	XAF1	XAF1	-0.676863	6.54134	0.00137335	0.0102916
ENSG00000165512	ZNF22	ZNF22	-0.677377	5.41978	0.00978459	0.0466204
ENSG00000232442	MHENCR	MHENCR	-0.677585	5.0687	0.00665635	0.0348342
ENSG00000242574	HLA-DMB	HLA-DMB	-0.678007	8.30785	0.000913676	0.00748037
ENSG00000047315	POLR2B	POLR2B	-0.678129	6.10357	0.00900286	0.0442004
ENSG00000142657	PGD	PGD	-0.678682	8.54387	0.00698185	0.0361347
ENSG00000128626	MRPS12	MRPS12	-0.679953	6.76326	0.000882104	0.00725203
ENSG00000185432	METTL7A	METTL7A	-0.680228	8.15188	0.000937063	0.00763636
ENSG00000062485	CS	CS	-0.681741	5.46562	0.00344528	0.0210024
ENSG00000110077	MS4A6A	MS4A6A	-0.68326	10.0252	0.00439644	0.0252957
ENSG00000033100	CHPF2	CHPF2	-0.683678	5.44165	0.00509552	0.0284259
ENSG00000157637	SLC38A10	SLC38A10	-0.685637	6.93758	0.00403976	0.0236424
ENSG00000163840	DTX3L	DTX3L	-0.686121	5.75557	0.00239311	0.0157068
ENSG00000197858	GPAA1	GPAA1	-0.686178	5.99729	0.00258717	0.016854
ENSG00000108559	NUP88	NUP88	-0.686385	4.44652	0.00779235	0.0397233
ENSG00000141367	CLTC	CLTC	-0.686436	7.36202	0.00300461	0.0189314
ENSG00000156735	BAG4	BAG4	-0.686821	5.50505	0.00324771	0.020066
ENSG00000272325	NUDT3	NUDT3	-0.68791	7.19373	0.000500025	0.0045581
ENSG00000117385	P3H1	P3H1	-0.68871	4.20049	0.00680948	0.0354237
ENSG00000147883	CDKN2B	CDKN2B	-0.689261	4.05853	0.00630241	0.033539
ENSG00000055332	EIF2AK2	EIF2AK2	-0.68996	5.78182	0.00678198	0.0353741
ENSG00000099991	CABIN1	CABIN1	-0.689964	5.28984	0.00332358	0.0204002
ENSG00000198909	MAP3K3	MAP3K3	-0.690232	7.52808	0.000488275	0.00447169
ENSG00000162302	RPS6KA4	RPS6KA4	-0.690254	6.38716	0.00077638	0.00655388
ENSG00000133884	DPF2	DPF2	-0.69043	5.57594	0.00210286	0.0143023
ENSG00000141012	GALNS	GALNS	-0.691304	4.2803	0.00806033	0.0408515
ENSG00000241685	ARPC1A	ARPC1A	-0.692704	4.89792	0.00574019	0.0312455
ENSG00000084652	TXLNA	TXLNA	-0.693703	5.16175	0.00484904	0.0273379
ENSG00000185219	ZNF445	ZNF445	-0.694051	5.24847	0.0057405	0.0312455
ENSG00000143437	ARNT	ARNT	-0.694624	5.27702	0.00295494	0.0186936
ENSG00000011007	ELOA	ELOA	-0.694645	5.69107	0.00181889	0.0128711
ENSG00000051009	FAM160A2	FAM160A2	-0.695749	5.5778	0.00305182	0.0190915
ENSG00000149091	DGKZ	DGKZ	-0.696104	6.81803	0.00135489	0.0101726
ENSG00000101849	TBL1X	TBL1X	-0.696389	5.17487	0.00387793	0.0228612
ENSG00000112624	BICRAL	BICRAL	-0.696891	4.74343	0.00522233	0.0289451
ENSG00000100888	CHD8	CHD8	-0.697155	5.91825	0.00167248	0.0120516
ENSG00000103066	PLA2G15	PLA2G15	-0.697298	4.32955	0.00840416	0.0421063
ENSG00000074603	DPP8	DPP8	-0.697332	5.87826	0.0035085	0.0212889
ENSG00000171608	PIK3CD	PIK3CD	-0.697519	6.01474	0.00119872	0.00921987
ENSG00000116199	FAM20B	FAM20B	-0.698012	4.7149	0.00513498	0.0285817
ENSG00000150054	MPP7	MPP7	-0.698243	5.59476	0.00657462	0.0345672
ENSG00000118705	RPN2	RPN2	-0.702442	7.33291	0.00063347	0.00553741
ENSG00000166454	ATMIN	ATMIN	-0.702479	5.48831	0.00502216	0.0281912
ENSG00000103540	CCP110	CCP110	-0.702608	3.91143	0.00651054	0.0343219
ENSG00000254470	AP5B1	AP5B1	-0.702635	6.67836	0.000632081	0.00553141
ENSG00000179820	MYADM	MYADM	-0.703056	8.6288	0.00112461	0.00876976
ENSG00000170802	FOXN2	FOXN2	-0.703979	7.13315	0.00439689	0.0252957
ENSG00000135457	TFCP2	TFCP2	-0.704376	5.36474	0.00189705	0.0132574
ENSG00000137414	FAM8A1	FAM8A1	-0.704505	4.21182	0.0102212	0.048176
ENSG00000274272	AC069281.2	AC069281.2	-0.704693	6.3813	0.00261451	0.016976
ENSG00000131473	ACLY	ACLY	-0.704874	5.79413	0.00126215	0.00964183
ENSG00000107651	SEC23IP	SEC23IP	-0.704942	4.95543	0.00447882	0.0256921
ENSG00000135363	LMO2	LMO2	-0.706235	8.07369	0.00659139	0.0346092
ENSG00000204310	AGPAT1	AGPAT1	-0.70637	4.8959	0.00683526	0.0355343
ENSG00000135686	KLHL36	KLHL36	-0.706628	5.59905	0.0101806	0.0480874
ENSG00000124098	FAM210B	FAM210B	-0.707157	5.67562	0.00676061	0.035286
ENSG00000143033	MTF2	MTF2	-0.707799	5.85514	0.00228457	0.0152387
ENSG00000130734	ATG4D	ATG4D	-0.707934	4.29036	0.00696484	0.0360889
ENSG00000165898	ISCA2	ISCA2	-0.707987	5.61001	0.00116075	0.00898045
ENSG00000174243	DDX23	DDX23	-0.70812	5.45564	0.00905199	0.0443367
ENSG00000068724	TTC7A	TTC7A	-0.70827	6.40274	0.00638922	0.0338182
ENSG00000196329	GIMAP5	GIMAP5	-0.70849	3.9395	0.00492269	0.0276936
ENSG00000151576	QTRT2	QTRT2	-0.708631	4.99219	0.0107088	0.0498476
ENSG00000105341	DMAC2	DMAC2	-0.708756	4.89641	0.00465045	0.0265413
ENSG00000089639	GMIP	GMIP	-0.710558	6.39636	0.00150925	0.0111405
ENSG00000164219	PGGT1B	PGGT1B	-0.710654	6.18072	0.00110111	0.00862919
ENSG00000154727	GABPA	GABPA	-0.711326	5.07046	0.00287514	0.0183654
ENSG00000168936	TMEM129	TMEM129	-0.711683	4.66538	0.00417255	0.0242531
ENSG00000276550	HERC2P2	HERC2P2	-0.712508	4.24924	0.00605109	0.0324648
ENSG00000238227	TMEM250	TMEM250	-0.713101	5.29768	0.00284896	0.0182426
ENSG00000137193	PIM1	PIM1	-0.71386	5.2668	0.00438989	0.0252924
ENSG00000125304	TM9SF2	TM9SF2	-0.714771	7.32559	0.000554174	0.00494861
ENSG00000246082	NUDT16P1	NUDT16P1	-0.715008	4.59613	0.00646305	0.0341173
ENSG00000114626	ABTB1	ABTB1	-0.716725	7.50267	0.000588829	0.00519912
ENSG00000120925	RNF170	RNF170	-0.716842	3.72946	0.00886645	0.0436804
ENSG00000158161	EYA3	EYA3	-0.717022	4.40264	0.00447499	0.0256888
ENSG00000068097	HEATR6	HEATR6	-0.717088	4.08379	0.0037784	0.0224424
ENSG00000100106	TRIOBP	TRIOBP	-0.717208	6.77901	0.000541768	0.00486248
ENSG00000197045	GMFB	GMFB	-0.717615	5.49994	0.00711887	0.0366939
ENSG00000175224	ATG13	ATG13	-0.717658	4.97219	0.00542562	0.0298799
ENSG00000123384	LRP1	LRP1	-0.717853	7.67695	0.000504265	0.00458614
ENSG00000165886	UBTD1	UBTD1	-0.71803	4.30928	0.00972171	0.0464299
ENSG00000007202	KIAA0100	KIAA0100	-0.718363	6.41519	0.00184262	0.0129902
ENSG00000170275	CRTAP	CRTAP	-0.719057	7.72293	0.00895636	0.0440327
ENSG00000115548	KDM3A	KDM3A	-0.719209	4.52769	0.00509249	0.0284259
ENSG00000095015	MAP3K1	MAP3K1	-0.720338	7.06368	0.00629402	0.033539
ENSG00000186575	NF2	NF2	-0.72069	4.39673	0.00950833	0.045691
ENSG00000076984	MAP2K7	MAP2K7	-0.72073	5.85088	0.00901822	0.0442004
ENSG00000108819	PPP1R9B	PPP1R9B	-0.721637	6.54936	0.000457003	0.0042246
ENSG00000172164	SNTB1	SNTB1	-0.721908	5.10544	0.00507832	0.0284069
ENSG00000150712	MTMR12	MTMR12	-0.722776	4.5044	0.00872844	0.0431098
ENSG00000196588	MRTFA	MRTFA	-0.722809	5.41403	0.00422912	0.0245096
ENSG00000166938	DIS3L	DIS3L	-0.722816	4.74607	0.00466563	0.0265894
ENSG00000164023	SGMS2	SGMS2	-0.725465	6.50148	0.00579911	0.0314775
ENSG00000116406	EDEM3	EDEM3	-0.7265	6.1979	0.00349302	0.0212441
ENSG00000100580	TMED8	TMED8	-0.727766	5.07641	0.00272289	0.0175647
ENSG00000091542	ALKBH5	ALKBH5	-0.729956	6.20257	0.000754214	0.00642878
ENSG00000139323	POC1B	POC1B	-0.73093	4.20373	0.00577215	0.0313645
ENSG00000165959	CLMN	CLMN	-0.731279	5.74983	0.00144677	0.0107779
ENSG00000257218	GATC	GATC	-0.7316	5.19552	0.00296781	0.0187295
ENSG00000100934	SEC23A	SEC23A	-0.731907	5.30253	0.00317992	0.0197361
ENSG00000133606	MKRN1	MKRN1	-0.732038	7.27613	0.000199491	0.00212323
ENSG00000159339	PADI4	PADI4	-0.732676	6.62242	0.00417235	0.0242531
ENSG00000237441	RGL2	RGL2	-0.732784	5.42941	0.00176058	0.0125487
ENSG00000196323	ZBTB44	ZBTB44	-0.733664	5.36756	0.00179395	0.0127634
ENSG00000174231	PRPF8	PRPF8	-0.733695	6.45554	0.00302404	0.0190082
ENSG00000111540	AC034102.1	AC034102.1	-0.734126	5.40172	0.00190375	0.0132925
ENSG00000181830	SLC35C1	SLC35C1	-0.734164	4.12865	0.00955282	0.045821
ENSG00000147394	ZNF185	ZNF185	-0.734361	4.59662	0.0103797	0.0488062
ENSG00000002919	SNX11	SNX11	-0.734513	5.16999	0.00207756	0.0141916
ENSG00000185669	SNAI3	SNAI3	-0.734987	4.11278	0.00455749	0.0260485
ENSG00000140199	SLC12A6	SLC12A6	-0.735379	6.0873	0.000688681	0.00595398
ENSG00000197312	DDI2	DDI2	-0.736713	5.41545	0.0042884	0.0247802
ENSG00000108219	TSPAN14	TSPAN14	-0.737214	7.70341	0.00229277	0.0152387
ENSG00000177981	ASB8	ASB8	-0.737772	5.90462	0.00295974	0.0186936
ENSG00000254413	CHKB-CPT1B	CHKB-CPT1B	-0.738544	4.36836	0.00308666	0.0192178
ENSG00000167528	ZNF641	ZNF641	-0.738551	4.79122	0.00288024	0.0183831
ENSG00000184575	XPOT	XPOT	-0.738667	5.01959	0.00424014	0.0245554
ENSG00000032444	PNPLA6	PNPLA6	-0.739779	6.03673	0.000734126	0.00628476
ENSG00000162174	ASRGL1	ASRGL1	-0.740261	4.82356	0.00863401	0.0427812
ENSG00000158863	FAM160B2	FAM160B2	-0.740378	3.97102	0.00611419	0.0327588
ENSG00000182487	NCF1B	NCF1B	-0.742868	6.67686	0.00295961	0.0186936
ENSG00000109118	PHF12	PHF12	-0.743027	4.91611	0.0105329	0.0492618
ENSG00000175938	ORAI3	ORAI3	-0.743102	5.08301	0.00234913	0.0154956
ENSG00000165819	METTL3	METTL3	-0.743586	4.08395	0.00570751	0.0311089
ENSG00000245848	CEBPA	CEBPA	-0.74546	7.10844	0.000455708	0.00421918
ENSG00000129071	MBD4	MBD4	-0.746723	6.48217	0.000546205	0.00488299
ENSG00000170855	TRIAP1	TRIAP1	-0.746874	5.22003	0.0018057	0.0128008
ENSG00000168827	GFM1	GFM1	-0.747884	5.15738	0.00567592	0.0309582
ENSG00000163743	RCHY1	RCHY1	-0.747896	5.27404	0.00138659	0.0103711
ENSG00000197043	ANXA6	ANXA6	-0.74855	5.89785	0.00546214	0.0300418
ENSG00000152464	RPP38	RPP38	-0.74973	4.70869	0.00496317	0.0279015
ENSG00000132294	EFR3A	EFR3A	-0.751127	6.35927	0.00359383	0.0216234
ENSG00000123815	COQ8B	COQ8B	-0.751247	4.9403	0.00595813	0.0321633
ENSG00000163050	COQ8A	COQ8A	-0.751287	5.42298	0.00165019	0.0119237
ENSG00000166181	API5	API5	-0.751431	5.38013	0.00378985	0.0224935
ENSG00000010322	NISCH	NISCH	-0.751843	5.81512	0.00727353	0.0373932
ENSG00000167635	ZNF146	ZNF146	-0.751859	4.9054	0.00352181	0.0213203
ENSG00000044446	PHKA2	PHKA2	-0.751919	5.01814	0.00448486	0.025708
ENSG00000117602	RCAN3	RCAN3	-0.752294	4.54075	0.00356659	0.0215088
ENSG00000033011	ALG1	ALG1	-0.753589	4.03835	0.00599524	0.0322528
ENSG00000277150	F8A3	F8A3	-0.753926	4.76592	0.00520381	0.0288628
ENSG00000132383	RPA1	RPA1	-0.755235	4.96292	0.00238713	0.0156937
ENSG00000178537	SLC25A20	SLC25A20	-0.755274	4.66762	0.00294525	0.018662
ENSG00000151702	FLI1	FLI1	-0.755277	7.09418	0.000292837	0.00290111
ENSG00000101191	DIDO1	DIDO1	-0.756557	5.00514	0.00267606	0.0172901
ENSG00000175166	PSMD2	PSMD2	-0.756565	6.90893	0.000416004	0.00391451
ENSG00000074964	ARHGEF10L	ARHGEF10L	-0.756908	5.03961	0.00239022	0.0157009
ENSG00000137965	IFI44	IFI44	-0.756981	5.61261	0.00349693	0.0212514
ENSG00000115234	SNX17	SNX17	-0.757941	7.62113	0.000794836	0.00668104
ENSG00000154822	PLCL2	PLCL2	-0.758611	5.40683	0.00168645	0.0121412
ENSG00000185049	NELFA	NELFA	-0.760233	4.55035	0.0025949	0.0168904
ENSG00000245849	RAD51-AS1	RAD51-AS1	-0.761421	3.54857	0.0102346	0.0482102
ENSG00000117984	CTSD	CTSD	-0.761995	9.00245	0.000535385	0.00481357
ENSG00000116903	EXOC8	EXOC8	-0.762485	4.16897	0.00680332	0.0354237
ENSG00000213903	LTB4R	LTB4R	-0.762559	7.18727	0.000749323	0.00639401
ENSG00000006007	GDE1	GDE1	-0.763474	6.09695	0.000398458	0.00375389
ENSG00000038427	VCAN	VCAN	-0.764356	10.7254	0.00849374	0.0423665
ENSG00000268173	AC007192.1	AC007192.1	-0.764712	9.28541	0.000462308	0.00426863
ENSG00000076067	RBMS2	RBMS2	-0.766096	4.0216	0.00663948	0.034769
ENSG00000136319	TTC5	TTC5	-0.766929	4.12727	0.00636536	0.03376
ENSG00000151948	GLT1D1	GLT1D1	-0.767203	6.31846	0.00184251	0.0129902
ENSG00000159069	FBXW5	FBXW5	-0.767214	7.07963	0.000338664	0.00328488
ENSG00000105397	TYK2	TYK2	-0.768025	6.17743	0.000979509	0.00788197
ENSG00000162408	NOL9	NOL9	-0.768075	4.80064	0.00340089	0.02078
ENSG00000169131	ZNF354A	ZNF354A	-0.768812	3.70788	0.00832267	0.0418311
ENSG00000084090	STARD7	STARD7	-0.769023	6.33882	0.00073062	0.00626155
ENSG00000186205	MARC1	MARC1	-0.769672	5.40501	0.00966556	0.046221
ENSG00000101493	ZNF516	ZNF516	-0.770226	5.79744	0.00550367	0.0301941
ENSG00000130517	PGPEP1	PGPEP1	-0.770432	5.11895	0.00155581	0.0113881
ENSG00000152457	DCLRE1C	DCLRE1C	-0.77104	4.80124	0.00516132	0.0286943
ENSG00000213965	NUDT19	NUDT19	-0.77202	4.51941	0.00364157	0.0217941
ENSG00000040633	PHF23	PHF23	-0.77349	4.5134	0.00791885	0.0402435
ENSG00000033800	PIAS1	PIAS1	-0.773584	7.07952	0.00150298	0.0111255
ENSG00000120685	PROSER1	PROSER1	-0.773831	4.56654	0.00388623	0.022893
ENSG00000178988	MRFAP1L1	MRFAP1L1	-0.774112	4.4165	0.00402548	0.0235898
ENSG00000133059	DSTYK	DSTYK	-0.774429	5.48909	0.00300244	0.0189314
ENSG00000138835	RGS3	RGS3	-0.775219	4.33544	0.00180181	0.0127905
ENSG00000089234	BRAP	BRAP	-0.775816	4.83104	0.00393652	0.0231373
ENSG00000100330	MTMR3	MTMR3	-0.775864	6.49127	0.00187779	0.0131462
ENSG00000135148	TRAFD1	TRAFD1	-0.77621	5.4153	0.00152572	0.0112304
ENSG00000212694	LINC01089	LINC01089	-0.77684	3.80449	0.0041036	0.0239407
ENSG00000105879	CBLL1	CBLL1	-0.777118	5.01408	0.00201238	0.0138604
ENSG00000134987	WDR36	WDR36	-0.778414	4.58149	0.00470417	0.0267334
ENSG00000185950	IRS2	IRS2	-0.779665	9.02732	0.00127796	0.00974365
ENSG00000110851	PRDM4	PRDM4	-0.780461	4.25276	0.00331909	0.0204002
ENSG00000166526	ZNF3	ZNF3	-0.781515	4.55018	0.00280599	0.0180261
ENSG00000107854	TNKS2	TNKS2	-0.78285	6.55655	0.000835592	0.00695328
ENSG00000198624	CCDC69	CCDC69	-0.783743	7.90133	4.21321e-05	0.000553978
ENSG00000111335	OAS2	OAS2	-0.784056	5.11964	0.00186437	0.013073
ENSG00000112282	MED23	MED23	-0.785054	4.38382	0.0021711	0.014615
ENSG00000100242	SUN2	SUN2	-0.785196	6.747	0.000284285	0.0028378
ENSG00000146054	TRIM7	TRIM7	-0.786433	4.9876	0.00292848	0.0186006
ENSG00000181220	ZNF746	ZNF746	-0.786522	4.96359	0.00239557	0.0157098
ENSG00000205060	SLC35B4	SLC35B4	-0.786779	4.26803	0.00227399	0.0151908
ENSG00000114450	GNB4	GNB4	-0.787662	6.68712	0.000443775	0.00412593
ENSG00000067082	KLF6	KLF6	-0.788168	9.51198	9.72696e-05	0.00114343
ENSG00000169926	KLF13	KLF13	-0.789795	6.52633	0.000648163	0.0056533
ENSG00000174130	TLR6	TLR6	-0.790639	3.59203	0.00834964	0.0419399
ENSG00000139370	SLC15A4	SLC15A4	-0.791425	6.13578	0.00132875	0.0100241
ENSG00000167186	COQ7	COQ7	-0.791833	5.59932	0.00621168	0.0331908
ENSG00000157259	GATAD1	GATAD1	-0.792593	6.33334	0.000342602	0.00331898
ENSG00000281162	LINC01127	LINC01127	-0.793174	5.40627	0.0107404	0.0499357
ENSG00000059145	UNKL	UNKL	-0.793245	3.87213	0.00371613	0.0221393
ENSG00000151657	KIN	KIN	-0.793318	6.02393	0.00382328	0.0226159
ENSG00000198791	CNOT7	CNOT7	-0.795282	6.42563	0.000174612	0.00190213
ENSG00000131242	RAB11FIP4	RAB11FIP4	-0.79561	4.13042	0.00291654	0.0185397
ENSG00000204516	MICB	MICB	-0.795657	4.49616	0.0051625	0.0286943
ENSG00000048828	FAM120A	FAM120A	-0.797039	7.75012	4.14434e-05	0.000545833
ENSG00000135900	MRPL44	MRPL44	-0.797547	5.80814	0.000546184	0.00488299
ENSG00000204131	NHSL2	NHSL2	-0.797731	4.14331	0.00324837	0.020066
ENSG00000163947	ARHGEF3	ARHGEF3	-0.79896	5.57029	0.00196377	0.013603
ENSG00000235863	B3GALT4	B3GALT4	-0.799341	5.24647	0.00163697	0.0118391
ENSG00000110931	CAMKK2	CAMKK2	-0.799562	6.38188	0.000367075	0.00350961
ENSG00000157350	ST3GAL2	ST3GAL2	-0.8	5.13276	0.00122919	0.00942655
ENSG00000100034	PPM1F	PPM1F	-0.800423	6.85512	0.000990949	0.00792357
ENSG00000179981	TSHZ1	TSHZ1	-0.802047	4.34405	0.0017846	0.0127084
ENSG00000100697	DICER1	DICER1	-0.802286	7.71207	0.000169881	0.00186224
ENSG00000151332	MBIP	MBIP	-0.804128	4.24936	0.00307486	0.0191899
ENSG00000101265	RASSF2	RASSF2	-0.804502	8.04117	3.09215e-05	0.000422809
ENSG00000148297	MED22	MED22	-0.80687	4.45895	0.00845919	0.0423013
ENSG00000104442	ARMC1	ARMC1	-0.807645	4.99457	0.0010357	0.00822294
ENSG00000145569	OTULINL	OTULINL	-0.80833	6.31209	0.000215028	0.00225808
ENSG00000143952	VPS54	VPS54	-0.809873	4.57449	0.00130093	0.00989963
ENSG00000170633	RNF34	RNF34	-0.811252	3.92034	0.00173555	0.0123953
ENSG00000106123	EPHB6	EPHB6	-0.814144	4.86731	0.00620963	0.0331908
ENSG00000168394	TAP1	TAP1	-0.816291	6.5745	0.000499312	0.00455687
ENSG00000170266	GLB1	GLB1	-0.816784	6.46132	0.000572223	0.00509246
ENSG00000139433	GLTP	GLTP	-0.817437	7.01974	5.97853e-05	0.000750988
ENSG00000183020	AP2A2	AP2A2	-0.81773	5.47698	0.00205899	0.0141137
ENSG00000119596	YLPM1	YLPM1	-0.818469	5.0833	0.0020949	0.0142605
ENSG00000129933	MAU2	MAU2	-0.818773	5.39571	0.00219881	0.0147704
ENSG00000187866	FAM122A	FAM122A	-0.819867	3.31334	0.00908346	0.0444356
ENSG00000160208	RRP1B	RRP1B	-0.822705	5.15217	0.000691576	0.00596588
ENSG00000135966	TGFBRAP1	TGFBRAP1	-0.825008	4.86401	0.00302946	0.0190272
ENSG00000124496	TRERF1	TRERF1	-0.82538	4.02976	0.00290028	0.0184811
ENSG00000071537	SEL1L	SEL1L	-0.825927	6.38269	0.000816173	0.00683122
ENSG00000164941	INTS8	INTS8	-0.828257	5.2126	0.000690885	0.00596588
ENSG00000151458	ANKRD50	ANKRD50	-0.830707	4.39976	0.00134765	0.010128
ENSG00000100368	CSF2RB	CSF2RB	-0.830855	5.53632	0.000220083	0.00229586
ENSG00000172667	ZMAT3	ZMAT3	-0.832304	4.50874	0.00150816	0.0111405
ENSG00000119138	KLF9	KLF9	-0.833088	7.78614	0.00199755	0.0137885
ENSG00000175073	VCPIP1	VCPIP1	-0.833623	5.66466	0.000186723	0.00201456
ENSG00000178761	FAM219B	FAM219B	-0.833894	4.1459	0.00286484	0.0183278
ENSG00000134686	PHC2	PHC2	-0.835797	8.61473	1.68593e-05	0.000251008
ENSG00000162227	TAF6L	TAF6L	-0.836154	4.20313	0.00231027	0.0152905
ENSG00000072736	NFATC3	NFATC3	-0.836624	5.76062	0.000591003	0.00520665
ENSG00000115207	GTF3C2	GTF3C2	-0.837325	4.63868	0.00303395	0.0190367
ENSG00000226816	AC005082.1	AC005082.1	-0.837788	4.35033	0.00286692	0.0183278
ENSG00000149547	EI24	EI24	-0.840052	5.58718	0.000255057	0.0025887
ENSG00000177125	ZBTB34	ZBTB34	-0.840208	4.06222	0.00170788	0.0122619
ENSG00000177728	TMEM94	TMEM94	-0.841654	4.22869	0.00186568	0.013073
ENSG00000061273	HDAC7	HDAC7	-0.84323	5.4465	0.00162352	0.0117554
ENSG00000146842	TMEM209	TMEM209	-0.843687	4.02732	0.00189587	0.0132574
ENSG00000049239	H6PD	H6PD	-0.843778	5.25075	0.00339907	0.02078
ENSG00000062725	APPBP2	APPBP2	-0.844	4.84848	0.00115576	0.00895941
ENSG00000158473	CD1D	CD1D	-0.844776	7.50348	0.00161265	0.011717
ENSG00000165178	NCF1C	NCF1C	-0.845227	8.65736	0.000497118	0.00454739
ENSG00000171115	GIMAP8	GIMAP8	-0.84672	6.55997	0.000194986	0.00208373
ENSG00000114491	UMPS	UMPS	-0.847042	4.10814	0.00165895	0.0119761
ENSG00000134759	ELP2	ELP2	-0.848757	5.26827	0.00266128	0.0172087
ENSG00000110906	KCTD10	KCTD10	-0.84876	4.00936	0.00150004	0.0111141
ENSG00000069974	RAB27A	RAB27A	-0.849085	7.26796	0.00230297	0.0152743
ENSG00000257921	AC025165.3	AC025165.3	-0.850669	3.6188	0.003537	0.0213795
ENSG00000101916	TLR8	TLR8	-0.851998	6.01907	0.000192569	0.0020635
ENSG00000070061	ELP1	ELP1	-0.852077	4.03493	0.00151115	0.011144
ENSG00000235568	NFAM1	NFAM1	-0.852469	7.05847	0.000239079	0.00244862
ENSG00000087338	GMCL1	GMCL1	-0.85263	5.21318	0.000768564	0.00650883
ENSG00000130349	C6orf203	C6orf203	-0.853148	4.36416	0.000956353	0.00772537
ENSG00000146592	CREB5	CREB5	-0.854144	6.7521	0.000807915	0.00678373
ENSG00000135842	FAM129A	FAM129A	-0.857469	4.54135	0.00922025	0.0449095
ENSG00000092964	DPYSL2	DPYSL2	-0.858465	6.9711	0.000173081	0.00189069
ENSG00000164074	ABHD18	ABHD18	-0.858501	4.50452	0.00114016	0.00886687
ENSG00000125817	CENPB	CENPB	-0.858915	6.10073	0.0001674	0.00183883
ENSG00000130305	NSUN5	NSUN5	-0.859228	4.92945	0.00110345	0.00863033
ENSG00000179041	RRS1	RRS1	-0.863435	3.89916	0.00147437	0.0109445
ENSG00000215908	CROCCP2	CROCCP2	-0.864494	4.63218	0.000872239	0.00717843
ENSG00000122122	SASH3	SASH3	-0.866398	6.69956	0.000265036	0.00267276
ENSG00000100220	RTCB	RTCB	-0.868127	6.18506	8.85276e-05	0.00105643
ENSG00000115828	QPCT	QPCT	-0.868381	6.66183	0.00261994	0.0169972
ENSG00000259522	AL136295.4	AL136295.4	-0.869051	2.93999	0.00932865	0.0451028
ENSG00000139641	ESYT1	ESYT1	-0.869841	4.935	0.00154539	0.0113434
ENSG00000143315	PIGM	PIGM	-0.870868	3.74225	0.00887956	0.0437096
ENSG00000072818	ACAP1	ACAP1	-0.871455	5.9156	0.00487004	0.027417
ENSG00000139718	SETD1B	SETD1B	-0.872148	4.83329	0.000987672	0.00790539
ENSG00000070214	SLC44A1	SLC44A1	-0.873053	4.94731	0.00230871	0.0152905
ENSG00000130764	LRRC47	LRRC47	-0.873566	5.36067	0.0009539	0.00772537
ENSG00000125447	GGA3	GGA3	-0.87407	5.60475	0.00023564	0.00242285
ENSG00000006062	MAP3K14	MAP3K14	-0.875591	4.41897	0.000942104	0.00765739
ENSG00000215790	SLC35E2A	SLC35E2A	-0.875678	2.94668	0.00960292	0.0460052
ENSG00000241878	PISD	PISD	-0.876233	6.22084	7.51782e-05	0.000913496
ENSG00000178252	WDR6	WDR6	-0.877022	5.14648	0.000369867	0.00352672
ENSG00000177169	ULK1	ULK1	-0.877829	5.78451	0.000228394	0.00236248
ENSG00000247315	ZCCHC3	ZCCHC3	-0.879106	4.55283	0.00228755	0.0152387
ENSG00000204237	OXLD1	OXLD1	-0.87952	5.9327	0.000179857	0.00194582
ENSG00000111667	USP5	USP5	-0.87964	4.6112	0.0015914	0.011584
ENSG00000103994	ZNF106	ZNF106	-0.880657	8.13431	5.43101e-06	9.13989e-05
ENSG00000010292	NCAPD2	NCAPD2	-0.881023	4.18256	0.00105126	0.008313
ENSG00000187210	GCNT1	GCNT1	-0.88193	3.40847	0.00229855	0.0152643
ENSG00000124587	PEX6	PEX6	-0.882186	4.37596	0.000359537	0.00346016
ENSG00000134698	AGO4	AGO4	-0.882286	6.73623	1.95212e-05	0.00028472
ENSG00000128311	TST	TST	-0.882826	5.43541	0.000667975	0.00580681
ENSG00000102178	UBL4A	UBL4A	-0.883011	4.76521	0.000521237	0.00470248
ENSG00000125166	GOT2	GOT2	-0.883226	4.28112	0.00207546	0.0141895
ENSG00000171492	LRRC8D	LRRC8D	-0.883377	5.38319	0.000830406	0.00692826
ENSG00000184898	RBM43	RBM43	-0.883706	4.1176	0.00133002	0.0100241
ENSG00000075975	MKRN2	MKRN2	-0.885446	4.66627	0.00319827	0.0198343
ENSG00000148110	MFSD14B	MFSD14B	-0.885476	6.10081	0.000147862	0.00164719
ENSG00000259529	AL136295.5	AL136295.5	-0.887865	4.63164	0.00308284	0.0192092
ENSG00000151348	EXT2	EXT2	-0.887962	4.35841	0.0019398	0.0134726
ENSG00000214022	REPIN1	REPIN1	-0.88873	4.47237	0.00076941	0.00650899
ENSG00000123297	TSFM	TSFM	-0.888797	3.62848	0.00234738	0.0154956
ENSG00000197006	METTL9	METTL9	-0.892179	8.82854	0.00104051	0.00824686
ENSG00000233369	GTF2IP4	GTF2IP4	-0.892371	5.45888	0.000191572	0.00205841
ENSG00000014216	CAPN1	CAPN1	-0.892497	6.73465	0.000228569	0.00236248
ENSG00000115282	TTC31	TTC31	-0.893154	4.22925	0.00069317	0.00597175
ENSG00000120992	LYPLA1	LYPLA1	-0.893205	7.27666	2.43239e-05	0.000345803
ENSG00000198863	RUNDC1	RUNDC1	-0.89325	4.48362	0.000396365	0.00373947
ENSG00000108389	MTMR4	MTMR4	-0.894556	4.34204	0.000433948	0.00405912
ENSG00000164603	BMT2	BMT2	-0.895106	4.4015	0.000955564	0.00772537
ENSG00000198792	TMEM184B	TMEM184B	-0.897416	4.0271	0.00207983	0.0141948
ENSG00000180061	TMEM150B	TMEM150B	-0.897506	3.32822	0.00404346	0.0236424
ENSG00000157954	WIPI2	WIPI2	-0.899532	6.71113	0.000203287	0.0021549
ENSG00000130304	SLC27A1	SLC27A1	-0.899827	5.20216	0.00653509	0.0344283
ENSG00000112365	ZBTB24	ZBTB24	-0.902042	5.09513	0.00192867	0.0134308
ENSG00000130803	ZNF317	ZNF317	-0.903063	4.43429	0.00106665	0.00842624
ENSG00000160785	SLC25A44	SLC25A44	-0.905913	4.36224	0.00201324	0.0138604
ENSG00000198393	ZNF26	ZNF26	-0.906325	4.17533	0.00071831	0.00616276
ENSG00000116237	ICMT	ICMT	-0.906839	4.24746	0.00100716	0.00802875
ENSG00000082014	SMARCD3	SMARCD3	-0.908996	6.43866	0.00048761	0.00447169
ENSG00000153786	ZDHHC7	ZDHHC7	-0.909527	6.97127	5.23111e-06	8.86027e-05
ENSG00000123338	NCKAP1L	NCKAP1L	-0.911457	8.06861	8.70845e-06	0.000139123
ENSG00000279738	AL022311.1	AL022311.1	-0.914839	5.34482	0.000351067	0.00338433
ENSG00000115806	GORASP2	GORASP2	-0.915653	5.27428	0.00110264	0.00863033
ENSG00000112996	MRPS30	MRPS30	-0.915746	5.30181	0.000373932	0.00356117
ENSG00000132825	PPP1R3D	PPP1R3D	-0.91766	4.33309	0.0010408	0.00824686
ENSG00000136937	NCBP1	NCBP1	-0.917877	4.47484	0.000811119	0.00679614
ENSG00000163428	LRRC58	LRRC58	-0.919713	6.38474	0.000130893	0.00149405
ENSG00000113658	SMAD5	SMAD5	-0.921089	4.3746	0.00938474	0.0452351
ENSG00000090863	GLG1	GLG1	-0.921462	6.52907	2.53483e-05	0.00035587
ENSG00000138413	IDH1	IDH1	-0.92348	5.44477	0.00704105	0.0363528
ENSG00000176994	SMCR8	SMCR8	-0.924812	5.5121	5.37309e-05	0.000681457
ENSG00000114268	PFKFB4	PFKFB4	-0.926107	4.70819	0.000841544	0.00697684
ENSG00000004399	PLXND1	PLXND1	-0.926189	5.78167	0.00229005	0.0152387
ENSG00000204209	DAXX	DAXX	-0.926544	4.98743	0.00038793	0.00367539
ENSG00000236264	RPL26P30	RPL26P30	-0.927989	2.73014	0.00923662	0.0449143
ENSG00000263465	SRSF8	SRSF8	-0.931267	4.81417	0.000978086	0.00788197
ENSG00000215193	PEX26	PEX26	-0.931489	4.26346	0.00142597	0.0106354
ENSG00000144028	SNRNP200	SNRNP200	-0.933596	6.18309	1.78052e-05	0.00026261
ENSG00000126882	FAM78A	FAM78A	-0.936742	5.85708	3.30888e-05	0.00044855
ENSG00000145332	KLHL8	KLHL8	-0.936801	6.81448	0.00131463	0.00996538
ENSG00000125450	NUP85	NUP85	-0.938257	4.23738	0.000987599	0.00790539
ENSG00000160710	ADAR	ADAR	-0.938714	7.20653	1.90557e-05	0.000279484
ENSG00000174718	RESF1	RESF1	-0.940425	6.94159	1.57923e-05	0.000237367
ENSG00000169925	BRD3	BRD3	-0.941285	6.24108	3.38337e-05	0.00045786
ENSG00000158109	TPRG1L	TPRG1L	-0.941971	4.8179	0.00039166	0.00370314
ENSG00000198925	ATG9A	ATG9A	-0.942046	3.98357	0.000429535	0.00402654
ENSG00000112303	VNN2	VNN2	-0.942871	6.40789	1.43069e-05	0.000217952
ENSG00000164880	INTS1	INTS1	-0.943113	5.58505	4.45202e-05	0.00058246
ENSG00000079999	KEAP1	KEAP1	-0.944297	4.65842	0.000214543	0.00225599
ENSG00000137642	SORL1	SORL1	-0.944358	7.32729	4.75381e-06	8.21075e-05
ENSG00000121486	TRMT1L	TRMT1L	-0.94508	4.26587	0.000388258	0.00367539
ENSG00000179163	FUCA1	FUCA1	-0.945947	5.258	0.000144735	0.00161692
ENSG00000123810	B9D2	B9D2	-0.948356	4.51036	0.00124293	0.00952265
ENSG00000108599	AKAP10	AKAP10	-0.948896	5.72077	4.73613e-05	0.000614527
ENSG00000177191	B3GNT8	B3GNT8	-0.949506	3.44386	0.00209279	0.0142605
ENSG00000090857	PDPR	PDPR	-0.950819	5.47723	0.000260725	0.00263296
ENSG00000253710	ALG11	ALG11	-0.953025	4.27378	0.000304419	0.00300452
ENSG00000081721	DUSP12	DUSP12	-0.954005	5.02072	0.000578737	0.00513304
ENSG00000277053	GTF2IP1	GTF2IP1	-0.954356	5.61465	3.61335e-05	0.000483992
ENSG00000105556	MIER2	MIER2	-0.955159	4.68196	0.000578542	0.00513304
ENSG00000135929	CYP27A1	CYP27A1	-0.956025	5.61467	0.0035777	0.0215593
ENSG00000135317	SNX14	SNX14	-0.956229	5.79925	0.000121899	0.00139964
ENSG00000276293	PIP4K2B	PIP4K2B	-0.957038	4.33598	0.000273061	0.00274315
ENSG00000196743	GM2A	GM2A	-0.957874	6.73852	0.00283176	0.018162
ENSG00000130227	XPO7	XPO7	-0.957952	4.9785	0.000243858	0.00249108
ENSG00000088812	ATRN	ATRN	-0.959363	4.2154	0.0009074	0.00743671
ENSG00000164056	SPRY1	SPRY1	-0.960709	4.99538	0.000987178	0.00790539
ENSG00000180340	FZD2	FZD2	-0.96214	4.63922	0.000688564	0.00595398
ENSG00000165156	ZHX1	ZHX1	-0.962277	3.99494	0.000427894	0.00402159
ENSG00000263126	AC040162.3	AC040162.3	-0.963281	3.84297	0.000846782	0.00701288
ENSG00000091106	NLRC4	NLRC4	-0.964128	5.42258	0.000131648	0.00149836
ENSG00000108604	SMARCD2	SMARCD2	-0.965522	6.33086	0.00052694	0.00474849
ENSG00000185591	SP1	SP1	-0.965546	6.13221	3.75351e-05	0.000499369
ENSG00000117153	KLHL12	KLHL12	-0.966091	4.42005	0.000481066	0.0044211
ENSG00000127334	DYRK2	DYRK2	-0.967896	4.49035	0.000587383	0.00519218
ENSG00000136504	KAT7	KAT7	-0.968506	5.30011	0.0020742	0.0141895
ENSG00000124383	MPHOSPH10	MPHOSPH10	-0.970554	5.83206	0.0015052	0.0111314
ENSG00000137040	RANBP6	RANBP6	-0.971117	4.34144	0.000312443	0.0030645
ENSG00000143537	ADAM15	ADAM15	-0.971468	6.44545	0.000305461	0.00300726
ENSG00000196372	ASB13	ASB13	-0.973755	4.20372	0.00132197	0.00999215
ENSG00000155729	KCTD18	KCTD18	-0.973852	4.13926	0.00110072	0.00862919
ENSG00000178307	TMEM11	TMEM11	-0.974238	5.91749	1.12329e-05	0.000175537
ENSG00000284431	AL022238.4	AL022238.4	-0.974434	4.90572	0.000187495	0.00202013
ENSG00000177613	CSTF2T	CSTF2T	-0.974983	4.04754	0.000285432	0.00284565
ENSG00000079739	PGM1	PGM1	-0.977306	5.16962	0.00111032	0.00867551
ENSG00000147955	SIGMAR1	SIGMAR1	-0.977947	4.2162	0.00246822	0.0161459
ENSG00000186047	DLEU7	DLEU7	-0.979423	3.43866	0.00153707	0.0112962
ENSG00000145743	FBXL17	FBXL17	-0.980443	4.43393	0.000257834	0.00261031
ENSG00000005100	DHX33	DHX33	-0.982846	3.30763	0.00182495	0.0129024
ENSG00000106263	EIF3B	EIF3B	-0.98304	6.91757	0.000363295	0.00348336
ENSG00000284820	AC068946.2	AC068946.2	-0.983516	4.07848	0.000252422	0.00256935
ENSG00000166436	TRIM66	TRIM66	-0.985235	4.25065	0.000475503	0.00438019
ENSG00000168286	THAP11	THAP11	-0.985652	5.66812	7.52741e-05	0.000913496
ENSG00000279117	AP001972.5	AP001972.5	-0.995853	3.65749	0.00107501	0.00847529
ENSG00000121864	ZNF639	ZNF639	-0.996362	4.56904	0.000222295	0.00231281
ENSG00000070614	NDST1	NDST1	-0.998027	4.61817	0.00470449	0.0267334
ENSG00000104361	NIPAL2	NIPAL2	-0.999137	4.10608	0.000956157	0.00772537
ENSG00000256028	AC026362.1	AC026362.1	-0.999479	7.00779	4.92486e-06	8.46904e-05
ENSG00000065970	FOXJ2	FOXJ2	-1.00119	4.78643	0.000121494	0.00139899
ENSG00000182179	UBA7	UBA7	-1.00327	5.27409	0.000359811	0.00346016
ENSG00000198689	SLC9A6	SLC9A6	-1.00626	4.27911	0.000277181	0.00277746
ENSG00000273420	AC008738.7	AC008738.7	-1.00753	3.43337	0.00125664	0.00960902
ENSG00000182162	P2RY8	P2RY8	-1.008	5.57928	9.91023e-05	0.0011615
ENSG00000185009	AP3M1	AP3M1	-1.00873	5.00102	0.000133825	0.00151487
ENSG00000203710	CR1	CR1	-1.00941	5.47011	5.33369e-05	0.000679743
ENSG00000166716	ZNF592	ZNF592	-1.01111	5.10379	0.000237961	0.00244034
ENSG00000186815	TPCN1	TPCN1	-1.0122	5.25746	0.00381665	0.0226015
ENSG00000162971	TYW5	TYW5	-1.01309	4.01707	0.000465901	0.00429676
ENSG00000144959	NCEH1	NCEH1	-1.01361	4.98393	0.00127355	0.00971944
ENSG00000158156	XKR8	XKR8	-1.01837	4.41567	0.000329936	0.00321209
ENSG00000109743	BST1	BST1	-1.02045	7.05772	3.82958e-05	0.00050863
ENSG00000128604	IRF5	IRF5	-1.02341	6.53473	1.13366e-05	0.000176457
ENSG00000108100	CCNY	CCNY	-1.02995	7.84309	1.63726e-06	3.16834e-05
ENSG00000136478	TEX2	TEX2	-1.03016	4.94425	0.000603467	0.00530459
ENSG00000185905	C16orf54	C16orf54	-1.03196	6.12851	6.16782e-05	0.000766211
ENSG00000066294	CD84	CD84	-1.03224	6.19836	0.000137395	0.00154589
ENSG00000115275	MOGS	MOGS	-1.03265	4.98047	8.9884e-05	0.00107099
ENSG00000106144	CASP2	CASP2	-1.03418	5.24282	6.74105e-05	0.000832896
ENSG00000164088	PPM1M	PPM1M	-1.0345	5.94841	3.17248e-05	0.000432291
ENSG00000145416	MARCH1	MARCH1	-1.03467	8.15338	7.85329e-08	1.97612e-06
ENSG00000130881	LRP3	LRP3	-1.03593	3.68538	0.000529802	0.00476882
ENSG00000171720	HDAC3	HDAC3	-1.04037	5.36563	2.49642e-05	0.000352995
ENSG00000104142	VPS18	VPS18	-1.04138	4.84538	0.000193518	0.00207085
ENSG00000253797	UTP14C	UTP14C	-1.04165	3.92719	0.000289236	0.00287266
ENSG00000131779	PEX11B	PEX11B	-1.04216	4.04286	0.000108983	0.00126787
ENSG00000170909	OSCAR	OSCAR	-1.04488	6.8762	5.16604e-06	8.78784e-05
ENSG00000160695	VPS11	VPS11	-1.04652	4.84565	0.00013259	0.0015069
ENSG00000136381	IREB2	IREB2	-1.04726	5.87695	6.67807e-06	0.000109576
ENSG00000160007	ARHGAP35	ARHGAP35	-1.05004	4.28157	7.55595e-05	0.000915549
ENSG00000132773	TOE1	TOE1	-1.05646	4.34584	9.55818e-05	0.00112864
ENSG00000099849	RASSF7	RASSF7	-1.05729	4.44818	7.43206e-05	0.000904713
ENSG00000142687	KIAA0319L	KIAA0319L	-1.06178	6.9982	6.50018e-06	0.00010688
ENSG00000281887	GIMAP1-GIMAP5	GIMAP1-GIMAP5	-1.06229	3.75211	0.000133532	0.00151487
ENSG00000116685	KIAA2013	KIAA2013	-1.0625	6.39351	9.26052e-06	0.000146752
ENSG00000043143	JADE2	JADE2	-1.06571	5.19039	2.14095e-05	0.00030883
ENSG00000143889	HNRNPLL	HNRNPLL	-1.06642	3.89897	0.000693772	0.00597175
ENSG00000213261	EEF1B2P6	EEF1B2P6	-1.06654	3.77882	0.000383267	0.00364127
ENSG00000141699	RETREG3	RETREG3	-1.06762	5.44785	1.50974e-05	0.000228229
ENSG00000161533	ACOX1	ACOX1	-1.06832	5.15849	2.75773e-05	0.000383744
ENSG00000135636	DYSF	DYSF	-1.06916	5.42298	2.48467e-05	0.000351965
ENSG00000165801	ARHGEF40	ARHGEF40	-1.07155	6.61278	0.000396452	0.00373947
ENSG00000180901	KCTD2	KCTD2	-1.07218	4.01088	0.000822757	0.00687902
ENSG00000155508	CNOT8	CNOT8	-1.07501	5.86349	1.15664e-05	0.000178972
ENSG00000169896	ITGAM	ITGAM	-1.07546	7.78835	0.000338659	0.00328488
ENSG00000160445	ZER1	ZER1	-1.07674	4.24547	0.00185732	0.0130493
ENSG00000155868	MED7	MED7	-1.0789	3.1768	0.000582346	0.00515923
ENSG00000140577	CRTC3	CRTC3	-1.08318	4.99498	4.03345e-05	0.000532118
ENSG00000108984	MAP2K6	MAP2K6	-1.0864	5.06571	0.00155175	0.0113689
ENSG00000147457	CHMP7	CHMP7	-1.08928	4.51571	0.000509492	0.00461768
ENSG00000172831	CES2	CES2	-1.09391	4.24597	4.67965e-05	0.000609205
ENSG00000277998	AC107075.1	AC107075.1	-1.09492	4.13894	0.0022737	0.0151908
ENSG00000257341	AL928654.3	AL928654.3	-1.09627	6.57858	8.85859e-07	1.81221e-05
ENSG00000103042	SLC38A7	SLC38A7	-1.09856	3.99729	0.00158168	0.0115452
ENSG00000106771	TMEM245	TMEM245	-1.10181	5.22477	6.0818e-05	0.00076153
ENSG00000089159	PXN	PXN	-1.10232	5.96298	0.000192439	0.0020635
ENSG00000178966	RMI1	RMI1	-1.10264	4.21651	0.00265801	0.0172017
ENSG00000030582	GRN	GRN	-1.10898	9.70605	2.38402e-06	4.38705e-05
ENSG00000133704	IPO8	IPO8	-1.11066	5.1724	2.95653e-05	0.00040638
ENSG00000140848	CPNE2	CPNE2	-1.11157	5.13603	0.00152073	0.0112042
ENSG00000197629	MPEG1	MPEG1	-1.11526	8.87806	4.71933e-07	1.01834e-05
ENSG00000213380	COG8	COG8	-1.12393	3.69124	0.000305249	0.00300726
ENSG00000196865	NHLRC2	NHLRC2	-1.12639	4.56187	6.38472e-05	0.000791907
ENSG00000241772	AC092620.1	AC092620.1	-1.13011	4.18733	0.000757	0.00643182
ENSG00000175215	CTDSP2	CTDSP2	-1.13199	6.76684	1.10111e-07	2.70166e-06
ENSG00000198746	GPATCH3	GPATCH3	-1.13229	4.36969	6.05279e-05	0.000759104
ENSG00000174013	FBXO45	FBXO45	-1.13628	4.11796	0.00012745	0.00145689
ENSG00000162378	ZYG11B	ZYG11B	-1.1375	5.73269	8.95332e-06	0.000142457
ENSG00000121966	CXCR4	CXCR4	-1.13937	10.2109	0.00171745	0.0123194
ENSG00000117713	ARID1A	ARID1A	-1.13963	7.48005	2.25841e-08	6.17613e-07
ENSG00000124422	USP22	USP22	-1.14222	5.96122	2.07336e-06	3.87881e-05
ENSG00000228223	HCG11	HCG11	-1.14316	4.61202	1.20002e-05	0.000185321
ENSG00000092098	RNF31	RNF31	-1.14962	3.77528	9.78467e-05	0.0011485
ENSG00000155254	MARVELD1	MARVELD1	-1.15169	6.3447	9.09501e-05	0.00108206
ENSG00000070413	DGCR2	DGCR2	-1.1517	5.28156	0.000136479	0.00153778
ENSG00000123405	NFE2	NFE2	-1.15284	5.77524	0.00149678	0.0111004
ENSG00000270170	NCBP2AS2	NCBP2AS2	-1.15387	6.51976	0.000319464	0.00312559
ENSG00000131791	PRKAB2	PRKAB2	-1.15576	4.32002	4.71279e-05	0.000612507
ENSG00000187147	RNF220	RNF220	-1.1582	5.63595	5.70953e-07	1.21536e-05
ENSG00000257529	RPL36A-HNRNPH2	RPL36A-HNRNPH2	-1.15843	4.68237	0.00101289	0.00805807
ENSG00000064115	TM7SF3	TM7SF3	-1.16228	5.38788	1.1798e-06	2.3347e-05
ENSG00000178695	KCTD12	KCTD12	-1.16287	8.65952	3.3094e-08	8.74659e-07
ENSG00000258674	AC011448.1	AC011448.1	-1.16487	5.68395	0.00214536	0.0145162
ENSG00000165092	ALDH1A1	ALDH1A1	-1.16589	6.67976	3.18641e-05	0.00043344
ENSG00000165025	SYK	SYK	-1.16827	7.92486	2.55362e-07	5.8808e-06
ENSG00000142444	TIMM29	TIMM29	-1.17195	4.71897	6.10084e-05	0.000762471
ENSG00000114573	ATP6V1A	ATP6V1A	-1.17404	6.92678	1.05049e-06	2.10526e-05
ENSG00000058668	ATP2B4	ATP2B4	-1.17414	4.98253	5.37007e-05	0.000681457
ENSG00000182544	MFSD5	MFSD5	-1.17753	4.51311	0.000199061	0.00212152
ENSG00000069998	HDHD5	HDHD5	-1.17853	5.91674	3.96302e-06	6.99838e-05
ENSG00000088888	MAVS	MAVS	-1.18188	6.18173	7.8891e-05	0.000954447
ENSG00000107021	TBC1D13	TBC1D13	-1.1842	4.02652	4.44688e-05	0.00058246
ENSG00000181751	C5orf30	C5orf30	-1.18497	5.25967	0.000437977	0.00409194
ENSG00000176095	IP6K1	IP6K1	-1.18592	4.52848	9.64212e-06	0.000152493
ENSG00000081692	JMJD4	JMJD4	-1.1861	3.92902	4.01344e-05	0.000530367
ENSG00000171302	CANT1	CANT1	-1.19123	5.10225	4.95993e-06	8.49226e-05
ENSG00000198146	ZNF770	ZNF770	-1.19246	5.14094	1.92152e-05	0.0002813
ENSG00000223705	NSUN5P1	NSUN5P1	-1.19248	3.82099	4.85002e-05	0.000625993
ENSG00000141279	NPEPPS	NPEPPS	-1.19606	6.27668	4.03449e-06	7.07699e-05
ENSG00000188554	NBR1	NBR1	-1.20002	6.1373	8.63514e-06	0.000138233
ENSG00000012232	EXTL3	EXTL3	-1.20318	4.35506	0.000137974	0.00155019
ENSG00000157184	CPT2	CPT2	-1.20746	4.65336	2.52473e-05	0.000355086
ENSG00000186918	ZNF395	ZNF395	-1.20958	4.52982	1.28854e-05	0.000197443
ENSG00000010165	EEF1AKNMT	EEF1AKNMT	-1.21736	3.28642	0.000204947	0.00216957
ENSG00000196227	FAM217B	FAM217B	-1.21992	5.63497	3.26891e-07	7.35598e-06
ENSG00000163214	DHX57	DHX57	-1.22793	4.83591	6.37896e-06	0.000105548
ENSG00000152804	HHEX	HHEX	-1.23096	6.44288	1.11414e-07	2.71849e-06
ENSG00000177663	IL17RA	IL17RA	-1.23459	8.05477	1.93687e-08	5.40949e-07
ENSG00000196656	AC004057.1	AC004057.1	-1.23637	6.3271	0.0021518	0.0145348
ENSG00000139318	DUSP6	DUSP6	-1.23694	9.45737	4.64541e-06	8.04116e-05
ENSG00000172409	CLP1	CLP1	-1.23782	4.28408	5.35701e-05	0.000681457
ENSG00000120696	KBTBD7	KBTBD7	-1.25256	4.15023	0.00161712	0.0117296
ENSG00000135218	CD36	CD36	-1.25548	8.25835	1.21454e-05	0.000187196
ENSG00000164951	PDP1	PDP1	-1.25895	5.27236	9.69345e-07	1.95758e-05
ENSG00000185900	POMK	POMK	-1.26789	4.1706	9.85934e-06	0.000155616
ENSG00000151553	FAM160B1	FAM160B1	-1.26816	4.42263	0.000326889	0.00318636
ENSG00000124207	CSE1L	CSE1L	-1.29068	4.6901	2.01318e-06	3.79326e-05
ENSG00000099337	KCNK6	KCNK6	-1.29342	6.152	1.77049e-08	5.01597e-07
ENSG00000160993	ALKBH4	ALKBH4	-1.30091	4.16965	3.54893e-06	6.33819e-05
ENSG00000175727	MLXIP	MLXIP	-1.30478	7.44788	2.10027e-10	7.76607e-09
ENSG00000249437	NAIP	NAIP	-1.31121	7.17459	4.63027e-06	8.04116e-05
ENSG00000272501	AL662844.4	AL662844.4	-1.31732	4.70798	0.000941927	0.00765739
ENSG00000156675	RAB11FIP1	RAB11FIP1	-1.31891	7.98043	3.40999e-08	8.9823e-07
ENSG00000116005	PCYOX1	PCYOX1	-1.32149	4.14682	4.92515e-05	0.000633832
ENSG00000124659	TBCC	TBCC	-1.32368	4.84631	2.21766e-05	0.000316993
ENSG00000186222	BLOC1S4	BLOC1S4	-1.32477	5.70825	6.15668e-06	0.000102084
ENSG00000198848	CES1	CES1	-1.32863	8.08777	0.00339254	0.0207652
ENSG00000123643	SLC36A1	SLC36A1	-1.33085	4.44598	0.00215847	0.0145627
ENSG00000152518	ZFP36L2	ZFP36L2	-1.3406	10.1636	6.25408e-10	2.19898e-08
ENSG00000173867	AC013489.1	AC013489.1	-1.34072	3.556	0.000254308	0.00258443
ENSG00000226137	BAIAP2-DT	BAIAP2-DT	-1.3465	4.30053	1.3487e-06	2.64238e-05
ENSG00000170190	SLC16A5	SLC16A5	-1.34888	5.01119	1.64943e-05	0.000246506
ENSG00000187713	TMEM203	TMEM203	-1.35077	5.9965	2.31235e-08	6.25845e-07
ENSG00000164125	GASK1B	GASK1B	-1.35781	7.22808	6.04628e-09	1.83863e-07
ENSG00000054219	LY75	LY75	-1.35933	3.35496	2.00647e-05	0.000291568
ENSG00000125149	C16orf70	C16orf70	-1.36813	5.11422	1.0672e-06	2.13332e-05
ENSG00000105514	RAB3D	RAB3D	-1.38077	5.67189	5.0542e-07	1.08466e-05
ENSG00000164938	TP53INP1	TP53INP1	-1.38734	5.12237	8.49792e-08	2.11134e-06
ENSG00000132405	TBC1D14	TBC1D14	-1.38828	5.87276	3.86784e-07	8.55706e-06
ENSG00000132109	TRIM21	TRIM21	-1.39086	4.36203	2.31494e-07	5.34677e-06
ENSG00000106780	MEGF9	MEGF9	-1.39989	8.41998	1.69446e-09	5.63103e-08
ENSG00000165879	FRAT1	FRAT1	-1.40756	6.72524	8.8595e-08	2.18738e-06
ENSG00000181274	FRAT2	FRAT2	-1.4156	7.20795	2.36431e-09	7.68248e-08
ENSG00000235552	RPL6P27	RPL6P27	-1.4553	4.85609	3.31888e-06	5.98157e-05
ENSG00000138449	SLC40A1	SLC40A1	-1.47713	5.73097	4.4763e-05	0.000584665
ENSG00000169403	PTAFR	PTAFR	-1.48227	7.55651	5.07907e-11	2.11655e-09
ENSG00000164244	PRRC1	PRRC1	-1.49404	4.53995	2.88617e-07	6.62725e-06
ENSG00000274180	NATD1	NATD1	-1.51016	4.0237	6.81849e-07	1.42826e-05
ENSG00000169018	FEM1B	FEM1B	-1.52996	5.87665	3.1867e-08	8.45067e-07
ENSG00000185033	SEMA4B	SEMA4B	-1.53627	4.17827	1.65669e-06	3.19806e-05
ENSG00000100335	MIEF1	MIEF1	-1.56295	5.12325	1.18281e-08	3.4503e-07
ENSG00000267519	AC020916.1	AC020916.1	-1.57458	10.6164	4.00337e-15	2.28482e-13
ENSG00000140450	ARRDC4	ARRDC4	-1.61131	5.37051	8.29829e-07	1.71093e-05
ENSG00000180539	C9orf139	C9orf139	-1.61375	4.46502	6.1349e-05	0.000764532
ENSG00000182810	DDX28	DDX28	-1.62836	4.68081	1.66087e-08	4.7224e-07
ENSG00000259687	LINC01220	LINC01220	-1.63322	5.03017	1.90439e-08	5.33771e-07
ENSG00000100105	PATZ1	PATZ1	-1.71245	3.87632	1.60346e-07	3.79246e-06
ENSG00000133561	GIMAP6	GIMAP6	-1.73552	5.83126	1.01971e-09	3.5071e-08
ENSG00000121807	CCR2	CCR2	-1.82329	6.2109	5.0313e-05	0.000646436
ENSG00000116990	MYCL	MYCL	-1.98868	5.05135	1.53247e-11	6.5955e-10
ENSG00000272195	AL356512.1	AL356512.1	-2.0102	4.36625	1.33472e-07	3.22463e-06
ENSG00000166189	HPS6	HPS6	-2.02046	4.176	1.19235e-09	4.03045e-08
ENSG00000244398	AC116533.1	AC116533.1	-2.33616	6.01483	2.02159e-19	1.50208e-17
ENSG00000234797	RPS3AP6	RPS3AP6	-2.34192	4.6345	1.05957e-08	3.11386e-07

## Sheet: DCs
Significantly differentially expressed Genes in DC cluster Periphery vs PBMC
GeneId	Symbol	GeneName	log2FC	log2A	P.Value	adj.P.Val
ENSG00000204388	HSPA1B	HSPA1B	5.97881	10.4614	9.9534e-65	9.22481e-61
ENSG00000106211	HSPB1	HSPB1	4.22722	10.5426	9.05354e-10	1.23394e-07
ENSG00000095794	CREM	CREM	3.99393	8.96395	1.88718e-27	3.49808e-24
ENSG00000140379	BCL2A1	BCL2A1	3.72143	9.05329	8.41991e-31	3.11591e-27
ENSG00000081041	CXCL2	CXCL2	3.58097	7.83669	3.76655e-24	4.36355e-21
ENSG00000173391	OLR1	OLR1	3.41689	7.5738	1.18672e-28	2.74964e-25
ENSG00000112096	SOD2	SOD2	3.32293	9.20188	1.10131e-17	5.37205e-15
ENSG00000123358	NR4A1	NR4A1	3.30119	8.84838	1.05709e-11	2.1298e-09
ENSG00000166920	C15orf48	C15orf48	3.29106	7.1395	1.0086e-30	3.11591e-27
ENSG00000130844	ZNF331	ZNF331	3.28661	8.2833	5.46477e-18	2.97927e-15
ENSG00000112715	VEGFA	VEGFA	3.2571	8.20168	1.41424e-18	9.36229e-16
ENSG00000162772	ATF3	ATF3	3.13577	8.73989	1.09538e-16	4.61454e-14
ENSG00000112149	CD83	CD83	3.08463	9.80869	9.18795e-12	1.89231e-09
ENSG00000119508	NR4A3	NR4A3	3.05203	7.8441	2.51792e-10	3.88935e-08
ENSG00000158050	DUSP2	DUSP2	3.03996	9.3207	4.19529e-12	9.04232e-10
ENSG00000011422	PLAUR	PLAUR	3.02009	8.38187	2.97748e-17	1.3493e-14
ENSG00000151929	BAG3	BAG3	2.9215	7.12989	4.97349e-23	5.12159e-20
ENSG00000198435	NRARP	NRARP	2.88138	7.52027	8.87249e-11	1.52742e-08
ENSG00000120694	HSPH1	HSPH1	2.87254	8.34457	2.75262e-18	1.70075e-15
ENSG00000132965	ALOX5AP	ALOX5AP	2.85962	9.25015	4.42525e-15	1.51901e-12
ENSG00000123975	CKS2	CKS2	2.80591	8.07943	4.5543e-13	1.14079e-10
ENSG00000170458	CD14	CD14	2.76728	8.20692	2.4101e-07	1.87704e-05
ENSG00000120875	DUSP4	DUSP4	2.76551	6.79644	1.14045e-21	1.05696e-18
ENSG00000258227	CLEC5A	CLEC5A	2.74604	6.58207	7.7198e-26	1.19245e-22
ENSG00000186352	ANKRD37	ANKRD37	2.70947	6.82873	2.54522e-21	2.14447e-18
ENSG00000163734	CXCL3	CXCL3	2.67042	6.36477	4.16258e-25	5.51125e-22
ENSG00000188483	IER5L	IER5L	2.58493	7.01298	3.05732e-17	1.3493e-14
ENSG00000113070	HBEGF	HBEGF	2.56106	8.04759	3.97338e-14	1.15079e-11
ENSG00000184588	PDE4B	PDE4B	2.5313	7.44772	2.76529e-10	4.20142e-08
ENSG00000170542	SERPINB9	SERPINB9	2.52676	8.11223	1.14298e-10	1.85845e-08
ENSG00000178381	ZFAND2A	ZFAND2A	2.49127	7.32611	3.07383e-18	1.78051e-15
ENSG00000202198	RF00100	RF00100	2.46054	6.64054	2.0921e-14	6.25471e-12
ENSG00000136603	SKIL	SKIL	2.39145	7.46331	9.6245e-14	2.62353e-11
ENSG00000115541	HSPE1	HSPE1	2.38562	10.2265	1.37873e-09	1.79972e-07
ENSG00000186480	INSIG1	INSIG1	2.3315	8.18837	1.34547e-09	1.78141e-07
ENSG00000102760	RGCC	RGCC	2.32552	8.53842	3.93957e-09	4.56399e-07
ENSG00000145414	NAF1	NAF1	2.29905	6.62291	1.61307e-13	4.2714e-11
ENSG00000139289	PHLDA1	PHLDA1	2.26844	6.4171	7.29716e-10	1.04046e-07
ENSG00000123095	BHLHE41	BHLHE41	2.23435	5.92082	9.88839e-20	7.63713e-17
ENSG00000138670	RASGEF1B	RASGEF1B	2.23155	6.78026	1.12586e-10	1.85845e-08
ENSG00000059804	SLC2A3	SLC2A3	2.22747	7.99841	1.24813e-10	1.99442e-08
ENSG00000086061	DNAJA1	DNAJA1	2.21794	9.64532	1.14566e-11	2.25914e-09
ENSG00000116044	NFE2L2	NFE2L2	2.21213	6.84951	2.31532e-15	8.73614e-13
ENSG00000155659	VSIG4	VSIG4	2.21179	7.52002	1.43227e-12	3.40366e-10
ENSG00000131669	NINJ1	NINJ1	2.20929	6.90659	1.1298e-14	3.73963e-12
ENSG00000125657	TNFSF9	TNFSF9	2.20131	6.43852	2.79038e-15	9.94662e-13
ENSG00000155307	SAMSN1	SAMSN1	2.16444	8.12367	1.34797e-10	2.11745e-08
ENSG00000125730	C3	C3	2.13718	5.70307	4.25947e-19	3.03667e-16
ENSG00000173369	C1QB	C1QB	2.13396	7.36735	1.04008e-10	1.75263e-08
ENSG00000163874	ZC3H12A	ZC3H12A	2.12242	6.12296	1.63786e-12	3.79493e-10
ENSG00000164543	STK17A	STK17A	2.11924	6.84335	6.54167e-14	1.83722e-11
ENSG00000184557	SOCS3	SOCS3	2.08981	7.55643	8.89953e-11	1.52742e-08
ENSG00000110651	CD81	CD81	2.08973	8.99572	2.99934e-07	2.24176e-05
ENSG00000232810	TNF	TNF	2.06696	5.94332	1.43555e-15	5.78465e-13
ENSG00000203747	FCGR3A	FCGR3A	2.05843	6.36727	8.62011e-10	1.1924e-07
ENSG00000173372	C1QA	C1QA	2.05127	7.21318	6.67935e-07	4.61972e-05
ENSG00000124216	SNAI1	SNAI1	2.03244	6.36344	2.75896e-08	2.60919e-06
ENSG00000122861	PLAU	PLAU	2.03108	5.59577	7.40054e-18	3.81046e-15
ENSG00000100292	HMOX1	HMOX1	2.01418	7.23565	8.57856e-11	1.52742e-08
ENSG00000108551	RASD1	RASD1	1.98614	6.13414	6.25338e-08	5.41648e-06
ENSG00000269404	SPIB	SPIB	1.9752	6.9045	5.24859e-07	3.77085e-05
ENSG00000164169	PRMT9	PRMT9	1.96375	7.63021	1.98079e-09	2.44772e-07
ENSG00000181649	PHLDA2	PHLDA2	1.9623	7.25581	6.69989e-08	5.7495e-06
ENSG00000102393	GLA	GLA	1.9593	7.32226	4.69867e-07	3.40213e-05
ENSG00000139112	GABARAPL1	GABARAPL1	1.94377	7.88782	0.000100484	0.00368097
ENSG00000144381	HSPD1	HSPD1	1.93899	9.93558	1.63348e-06	0.000101604
ENSG00000110848	CD69	CD69	1.93793	7.21076	7.12165e-11	1.29418e-08
ENSG00000162924	REL	REL	1.93686	10.1656	6.09769e-10	8.97038e-08
ENSG00000182853	VMO1	VMO1	1.93384	5.51018	2.35653e-15	8.73614e-13
ENSG00000272196	HIST2H2AA4	HIST2H2AA4	1.92176	7.98469	1.93348e-09	2.42155e-07
ENSG00000203812	HIST2H2AA3	HIST2H2AA3	1.92176	7.98469	1.93348e-09	2.42155e-07
ENSG00000116741	RGS2	RGS2	1.92114	10.2358	1.31432e-09	1.76538e-07
ENSG00000159388	BTG2	BTG2	1.90971	8.26841	6.8724e-10	9.9521e-08
ENSG00000057657	PRDM1	PRDM1	1.90662	6.15788	2.67167e-12	5.89548e-10
ENSG00000075426	FOSL2	FOSL2	1.90561	7.59088	1.81318e-07	1.47408e-05
ENSG00000159189	C1QC	C1QC	1.90124	5.95283	1.87951e-12	4.24861e-10
ENSG00000198814	GK	GK	1.879	7.21199	2.2939e-08	2.21457e-06
ENSG00000100644	HIF1A	HIF1A	1.85663	7.50484	8.46686e-09	9.23187e-07
ENSG00000260708	AL118516.1	AL118516.1	1.85381	6.92325	4.83867e-08	4.312e-06
ENSG00000166592	RRAD	RRAD	1.85222	5.41335	1.21371e-14	3.87886e-12
ENSG00000283293	RN7SK	RN7SK	1.84267	6.04958	2.60166e-09	3.13145e-07
ENSG00000119655	NPC2	NPC2	1.83275	9.80908	1.23972e-07	1.01679e-05
ENSG00000129757	CDKN1C	CDKN1C	1.83034	5.48653	3.99604e-13	1.02876e-10
ENSG00000128245	YWHAH	YWHAH	1.82021	8.9072	2.12288e-05	0.000998725
ENSG00000167601	AXL	AXL	1.81444	6.80486	3.22854e-08	3.02244e-06
ENSG00000140403	DNAJA4	DNAJA4	1.80442	5.84481	6.68838e-12	1.40882e-09
ENSG00000073756	PTGS2	PTGS2	1.80125	7.49429	4.1135e-07	3.00188e-05
ENSG00000010278	CD9	CD9	1.79903	7.17846	2.55474e-08	2.44096e-06
ENSG00000165312	OTUD1	OTUD1	1.79803	7.92888	1.11688e-08	1.1898e-06
ENSG00000139572	GPR84	GPR84	1.79659	5.45436	1.29298e-12	3.15351e-10
ENSG00000110079	MS4A4A	MS4A4A	1.79222	6.70194	1.23184e-08	1.29663e-06
ENSG00000116752	BCAS2	BCAS2	1.78866	7.8741	1.9209e-08	1.89393e-06
ENSG00000137801	THBS1	THBS1	1.76448	6.80768	3.79196e-09	4.44859e-07
ENSG00000144655	CSRNP1	CSRNP1	1.76188	7.95762	4.76579e-05	0.0020077
ENSG00000105835	NAMPT	NAMPT	1.75299	8.82047	1.86093e-06	0.000111748
ENSG00000103257	SLC7A5	SLC7A5	1.75253	5.87635	6.11628e-07	4.36044e-05
ENSG00000090339	ICAM1	ICAM1	1.74611	6.41281	3.71021e-05	0.00161438
ENSG00000166927	MS4A7	MS4A7	1.74331	7.44349	2.63884e-09	3.13549e-07
ENSG00000276900	AC023157.3	AC023157.3	1.7392	6.33683	0.00199922	0.0388444
ENSG00000112137	PHACTR1	PHACTR1	1.73008	7.76151	1.03045e-07	8.7617e-06
ENSG00000095970	TREM2	TREM2	1.71906	5.22417	2.01972e-14	6.23958e-12
ENSG00000113811	SELENOK	SELENOK	1.7177	8.71189	2.90843e-07	2.20945e-05
ENSG00000125735	TNFSF14	TNFSF14	1.7104	5.64517	1.86696e-08	1.86054e-06
ENSG00000130222	GADD45G	GADD45G	1.70753	5.5413	1.19212e-11	2.30178e-09
ENSG00000169895	SYAP1	SYAP1	1.70747	8.6434	2.18778e-07	1.71834e-05
ENSG00000178726	THBD	THBD	1.70517	6.42954	7.08729e-07	4.82978e-05
ENSG00000188313	PLSCR1	PLSCR1	1.69038	8.43368	5.99842e-09	6.76739e-07
ENSG00000138166	DUSP5	DUSP5	1.68887	6.56744	9.61938e-07	6.32287e-05
ENSG00000008294	SPAG9	SPAG9	1.68633	7.69042	2.16961e-08	2.11663e-06
ENSG00000124882	EREG	EREG	1.67546	9.37703	0.000111789	0.00402674
ENSG00000169508	GPR183	GPR183	1.67271	10.7329	5.62873e-05	0.00228529
ENSG00000118985	ELL2	ELL2	1.64884	5.30872	5.77076e-11	1.0915e-08
ENSG00000023445	BIRC3	BIRC3	1.64542	6.82289	1.78252e-09	2.2945e-07
ENSG00000059728	MXD1	MXD1	1.63954	7.11679	2.83404e-06	0.000161368
ENSG00000196352	CD55	CD55	1.62041	7.87063	1.83976e-06	0.000111748
ENSG00000145287	PLAC8	PLAC8	1.61952	8.68969	3.55635e-07	2.61589e-05
ENSG00000175197	DDIT3	DDIT3	1.60612	6.83592	3.73686e-08	3.42903e-06
ENSG00000185022	MAFF	MAFF	1.60518	7.52392	5.64666e-05	0.00228529
ENSG00000203760	CENPW	CENPW	1.59675	6.40899	3.77824e-05	0.0016363
ENSG00000234883	MIR155HG	MIR155HG	1.59191	5.79349	4.67872e-08	4.20994e-06
ENSG00000146278	PNRC1	PNRC1	1.58117	9.8495	4.22365e-08	3.83773e-06
ENSG00000213316	LTC4S	LTC4S	1.57836	7.02807	2.98592e-07	2.24176e-05
ENSG00000132510	KDM6B	KDM6B	1.57344	8.43503	0.000824406	0.0196923
ENSG00000143878	RHOB	RHOB	1.57032	8.5857	3.8456e-06	0.000210894
ENSG00000154640	BTG3	BTG3	1.56651	5.84228	1.45195e-08	1.47876e-06
ENSG00000276216	AC245014.3	AC245014.3	1.5586	6.78303	4.93075e-05	0.00204924
ENSG00000173559	NABP1	NABP1	1.54736	6.53693	9.00142e-05	0.00336392
ENSG00000139832	RAB20	RAB20	1.54732	6.24879	3.32211e-05	0.00148424
ENSG00000150347	ARID5B	ARID5B	1.53466	6.41432	5.98517e-08	5.23307e-06
ENSG00000136634	IL10	IL10	1.5344	5.1411	7.02074e-11	1.29418e-08
ENSG00000105849	TWISTNB	TWISTNB	1.52378	7.12557	1.23615e-05	0.000606171
ENSG00000099985	OSM	OSM	1.52321	6.33215	5.975e-05	0.00238691
ENSG00000038945	MSR1	MSR1	1.5223	5.35372	4.68215e-09	5.3573e-07
ENSG00000086062	B4GALT1	B4GALT1	1.51434	5.75583	1.24514e-08	1.29663e-06
ENSG00000198355	PIM3	PIM3	1.50914	7.54663	0.000106739	0.00387944
ENSG00000117036	ETV3	ETV3	1.49848	7.23202	3.84381e-06	0.000210894
ENSG00000165997	ARL5B	ARL5B	1.48963	6.78415	1.8512e-06	0.000111748
ENSG00000277443	MARCKS	MARCKS	1.48431	6.86722	0.000145169	0.00500159
ENSG00000273319	AC058791.1	AC058791.1	1.46408	7.22829	1.6057e-06	0.000100552
ENSG00000204569	PPP1R10	PPP1R10	1.46384	7.64368	1.27121e-06	8.18166e-05
ENSG00000051108	HERPUD1	HERPUD1	1.46107	10.2234	7.48992e-05	0.00288036
ENSG00000187474	FPR3	FPR3	1.46102	5.46456	1.59442e-08	1.60621e-06
ENSG00000273702	AC091271.1	AC091271.1	1.46074	6.06007	1.89054e-07	1.51048e-05
ENSG00000148926	ADM	ADM	1.45991	5.19539	8.4376e-10	1.18484e-07
ENSG00000137267	TUBB2A	TUBB2A	1.4592	5.20229	6.31612e-09	6.96879e-07
ENSG00000167604	NFKBID	NFKBID	1.45492	6.83312	0.000247103	0.00760848
ENSG00000117318	ID3	ID3	1.44737	6.29621	1.08986e-07	9.18255e-06
ENSG00000153234	NR4A2	NR4A2	1.44689	9.41506	0.000482655	0.0130036
ENSG00000144802	NFKBIZ	NFKBIZ	1.43809	8.02747	5.82228e-05	0.00233597
ENSG00000197405	C5AR1	C5AR1	1.4342	5.44577	3.33106e-05	0.00148424
ENSG00000184205	TSPYL2	TSPYL2	1.42885	5.7978	1.11631e-06	7.23493e-05
ENSG00000187193	MT1X	MT1X	1.42824	6.87156	2.73543e-07	2.0952e-05
ENSG00000188290	HES4	HES4	1.42726	5.11968	2.48569e-09	3.03123e-07
ENSG00000188486	H2AFX	H2AFX	1.4246	6.54693	2.53876e-07	1.96077e-05
ENSG00000177426	TGIF1	TGIF1	1.42396	6.75321	4.51088e-06	0.000243063
ENSG00000163661	PTX3	PTX3	1.41028	5.61565	9.20657e-07	6.09475e-05
ENSG00000136158	SPRY2	SPRY2	1.40502	5.33419	6.24696e-07	4.41961e-05
ENSG00000145390	USP53	USP53	1.40337	6.18533	1.11943e-05	0.000551854
ENSG00000065989	PDE4A	PDE4A	1.39795	6.25898	0.000157228	0.00535731
ENSG00000146232	NFKBIE	NFKBIE	1.3898	6.24407	3.48893e-06	0.000195972
ENSG00000124145	SDC4	SDC4	1.38954	5.15625	1.08414e-08	1.16835e-06
ENSG00000136758	YME1L1	YME1L1	1.38489	8.09438	3.6328e-05	0.00160328
ENSG00000101665	SMAD7	SMAD7	1.37839	6.25018	1.78815e-06	0.000110484
ENSG00000171860	C3AR1	C3AR1	1.37343	5.39574	4.90702e-08	4.33126e-06
ENSG00000071073	MGAT4A	MGAT4A	1.37312	6.08745	5.08345e-05	0.00210328
ENSG00000141543	EIF4A3	EIF4A3	1.36185	8.05384	3.9996e-06	0.000218049
ENSG00000134480	CCNH	CCNH	1.35719	7.38864	2.75265e-06	0.000158457
ENSG00000165030	NFIL3	NFIL3	1.35548	7.56302	3.52281e-06	0.000196683
ENSG00000185885	IFITM1	IFITM1	1.35254	5.1718	1.34012e-08	1.38003e-06
ENSG00000124225	PMEPA1	PMEPA1	1.34403	4.92424	6.06057e-09	6.76739e-07
ENSG00000105939	ZC3HAV1	ZC3HAV1	1.34096	7.6754	0.00071442	0.0173786
ENSG00000069849	ATP1B3	ATP1B3	1.33839	9.03447	0.000200712	0.00655
ENSG00000186834	HEXIM1	HEXIM1	1.33726	5.97283	8.61816e-07	5.78791e-05
ENSG00000124575	HIST1H1D	HIST1H1D	1.33725	6.41919	2.50085e-06	0.000145773
ENSG00000197019	SERTAD1	SERTAD1	1.33534	7.73908	0.000674461	0.0167585
ENSG00000110172	CHORDC1	CHORDC1	1.33373	6.93935	1.30111e-05	0.000634668
ENSG00000232956	SNHG15	SNHG15	1.32774	8.10283	0.00262919	0.0470412
ENSG00000105612	DNASE2	DNASE2	1.3266	5.72594	8.88859e-07	5.92658e-05
ENSG00000171791	BCL2	BCL2	1.31472	6.82106	2.23683e-06	0.000131209
ENSG00000137265	IRF4	IRF4	1.31285	6.3736	9.18564e-05	0.0034053
ENSG00000107968	MAP3K8	MAP3K8	1.3057	8.5427	0.000479901	0.0129671
ENSG00000119986	AVPI1	AVPI1	1.29554	5.47017	1.51779e-05	0.000728855
ENSG00000211455	STK38L	STK38L	1.29542	7.24623	9.15848e-06	0.000456348
ENSG00000168421	RHOH	RHOH	1.29212	5.24434	3.1686e-07	2.34932e-05
ENSG00000100311	PDGFB	PDGFB	1.29102	4.62919	3.2254e-10	4.82145e-08
ENSG00000175899	A2M	A2M	1.28384	5.02234	1.10524e-07	9.22826e-06
ENSG00000286887	AL355881.1	AL355881.1	1.2817	5.95991	7.9382e-05	0.00302762
ENSG00000182782	HCAR2	HCAR2	1.27887	5.93986	0.000304454	0.00897925
ENSG00000167613	LAIR1	LAIR1	1.26948	6.38055	7.0568e-06	0.000365377
ENSG00000151726	ACSL1	ACSL1	1.26292	6.74221	9.03464e-06	0.000452611
ENSG00000255112	CHMP1B	CHMP1B	1.25951	7.84976	0.000148946	0.0051127
ENSG00000173762	CD7	CD7	1.25611	5.74178	2.83805e-06	0.000161368
ENSG00000117632	STMN1	STMN1	1.24583	5.90349	3.74273e-06	0.00020771
ENSG00000189060	H1F0	H1F0	1.24043	5.08815	1.99209e-07	1.57801e-05
ENSG00000176845	METRNL	METRNL	1.23813	8.88846	6.39213e-05	0.00252095
ENSG00000197329	PELI1	PELI1	1.23785	6.52939	0.00020022	0.00655
ENSG00000287937	AC079753.2	AC079753.2	1.23422	4.85028	1.51544e-06	9.55448e-05
ENSG00000274213	AC015912.3	AC015912.3	1.2336	5.2982	1.44398e-06	9.22951e-05
ENSG00000143226	FCGR2A	FCGR2A	1.22223	6.80838	5.28991e-05	0.00217897
ENSG00000114315	HES1	HES1	1.22102	4.94261	2.06888e-06	0.000122913
ENSG00000109320	NFKB1	NFKB1	1.22039	8.05715	0.00121782	0.0266198
ENSG00000140030	GPR65	GPR65	1.21863	7.24021	6.58977e-05	0.00258182
ENSG00000135047	CTSL	CTSL	1.21824	4.7345	3.50949e-08	3.2526e-06
ENSG00000177374	HIC1	HIC1	1.21092	5.65515	2.92049e-05	0.00133335
ENSG00000006327	TNFRSF12A	TNFRSF12A	1.21086	5.05173	2.12831e-06	0.000125638
ENSG00000161921	CXCL16	CXCL16	1.20602	7.88239	6.07892e-05	0.002418
ENSG00000108179	PPIF	PPIF	1.19961	8.18561	0.00210737	0.0405215
ENSG00000172216	CEBPB	CEBPB	1.19794	10.4802	0.000636011	0.0159744
ENSG00000216490	IFI30	IFI30	1.19185	10.7706	2.78958e-05	0.00128626
ENSG00000147454	SLC25A37	SLC25A37	1.1847	7.6454	4.01736e-05	0.00171028
ENSG00000173334	TRIB1	TRIB1	1.18438	6.50298	0.000383386	0.010833
ENSG00000168003	SLC3A2	SLC3A2	1.18377	8.14007	0.000183128	0.00608327
ENSG00000102755	FLT1	FLT1	1.17335	4.62019	1.17855e-07	9.75246e-06
ENSG00000204136	GGTA1P	GGTA1P	1.16632	6.70324	1.43824e-05	0.000694251
ENSG00000068305	MEF2A	MEF2A	1.16491	7.51101	0.000305186	0.00897925
ENSG00000196923	PDLIM7	PDLIM7	1.1592	5.15321	5.1759e-06	0.000275689
ENSG00000270164	LINC01480	LINC01480	1.15741	4.87419	6.77144e-07	4.64872e-05
ENSG00000188229	TUBB4B	TUBB4B	1.15677	8.72886	0.00123313	0.0268279
ENSG00000116161	CACYBP	CACYBP	1.1557	8.04992	0.000243553	0.00754934
ENSG00000072364	AFF4	AFF4	1.15259	6.73386	2.50679e-05	0.00116165
ENSG00000236069	AL136987.1	AL136987.1	1.15155	5.97606	0.000432212	0.0118865
ENSG00000086619	ERO1B	ERO1B	1.15073	5.65163	0.00137729	0.0292768
ENSG00000100221	JOSD1	JOSD1	1.14564	6.65935	0.000713907	0.0173786
ENSG00000135823	STX6	STX6	1.14423	6.23279	0.000137238	0.00478167
ENSG00000140941	MAP1LC3B	MAP1LC3B	1.14188	8.76243	8.55676e-05	0.00322374
ENSG00000153201	RANBP2	RANBP2	1.13958	7.3427	0.000510019	0.0134721
ENSG00000223969	AC002456.1	AC002456.1	1.13916	4.66223	7.49479e-07	5.0702e-05
ENSG00000137193	PIM1	PIM1	1.13579	5.11473	7.88524e-06	0.000402469
ENSG00000125995	ROMO1	ROMO1	1.12702	7.93059	0.000241412	0.00750807
ENSG00000185896	LAMP1	LAMP1	1.12456	6.20861	3.07753e-05	0.00139816
ENSG00000145779	TNFAIP8	TNFAIP8	1.12449	8.07498	0.00114685	0.0256121
ENSG00000134744	TUT4	TUT4	1.12407	5.3658	0.000228291	0.00722948
ENSG00000006451	RALA	RALA	1.12386	7.48905	0.000104495	0.00381285
ENSG00000125454	SLC25A19	SLC25A19	1.11792	6.28041	8.16183e-05	0.00310016
ENSG00000168675	LDLRAD4	LDLRAD4	1.11644	6.08533	0.000521756	0.0136987
ENSG00000189067	LITAF	LITAF	1.11497	8.79061	0.000168581	0.00568148
ENSG00000239911	PRKAG2-AS1	PRKAG2-AS1	1.1149	6.88852	8.79399e-05	0.0032997
ENSG00000115419	GLS	GLS	1.11371	7.37424	0.000121953	0.00433049
ENSG00000129116	PALLD	PALLD	1.11123	5.30039	0.00168851	0.034094
ENSG00000115956	PLEK	PLEK	1.11122	9.33725	0.000211662	0.00683513
ENSG00000259781	HMGB1P6	HMGB1P6	1.11078	5.2144	8.1426e-06	0.000412381
ENSG00000184384	MAML2	MAML2	1.11021	5.50743	3.68912e-05	0.00161418
ENSG00000168386	FILIP1L	FILIP1L	1.10891	4.75587	4.30222e-06	0.000233175
ENSG00000196428	TSC22D2	TSC22D2	1.1063	6.07562	0.000500521	0.0133684
ENSG00000177150	FAM210A	FAM210A	1.10471	5.95144	0.000679037	0.0168065
ENSG00000171659	GPR34	GPR34	1.10284	4.73438	1.08392e-06	7.07448e-05
ENSG00000120063	GNA13	GNA13	1.10139	7.26702	0.00237157	0.044136
ENSG00000121797	CCRL2	CCRL2	1.10087	4.94831	2.68717e-06	0.000155655
ENSG00000126709	IFI6	IFI6	1.10085	6.96827	0.000141281	0.00488578
ENSG00000183696	UPP1	UPP1	1.10046	7.97267	0.000724518	0.0175781
ENSG00000176597	B3GNT5	B3GNT5	1.0975	4.81162	1.8103e-06	0.000111112
ENSG00000124731	TREM1	TREM1	1.09706	6.44091	0.000222711	0.00709307
ENSG00000164949	GEM	GEM	1.08792	4.86554	7.90348e-06	0.000402469
ENSG00000136527	TRA2B	TRA2B	1.08533	8.74095	0.000419964	0.0116534
ENSG00000179388	EGR3	EGR3	1.08308	5.00271	8.48589e-06	0.00042743
ENSG00000117450	PRDX1	PRDX1	1.08269	8.86134	0.000841977	0.0200088
ENSG00000197696	NMB	NMB	1.08038	5.77542	6.24647e-05	0.00247403
ENSG00000255198	SNHG9	SNHG9	1.07847	5.63067	4.89735e-05	0.00204453
ENSG00000168994	PXDC1	PXDC1	1.07784	4.6616	1.86889e-06	0.000111748
ENSG00000126264	HCST	HCST	1.07616	9.57936	0.000232057	0.00730883
ENSG00000056558	TRAF1	TRAF1	1.07352	4.55607	4.67889e-06	0.000250659
ENSG00000183484	GPR132	GPR132	1.07057	5.40712	0.000264361	0.00803312
ENSG00000165175	MID1IP1	MID1IP1	1.06971	6.91323	0.00134215	0.0287942
ENSG00000108106	UBE2S	UBE2S	1.06258	7.43519	0.000213839	0.00688147
ENSG00000146676	PURB	PURB	1.06258	6.89406	0.00045226	0.0123281
ENSG00000081189	MEF2C	MEF2C	1.06231	8.65595	0.000299316	0.00889123
ENSG00000245904	AC025164.1	AC025164.1	1.06195	5.5916	0.000338707	0.00987149
ENSG00000152484	USP12	USP12	1.05622	6.06142	7.5562e-05	0.00289384
ENSG00000069399	BCL3	BCL3	1.05221	6.05789	0.000743058	0.017934
ENSG00000136371	MTHFS	MTHFS	1.05176	5.68525	0.000588062	0.0150974
ENSG00000044574	HSPA5	HSPA5	1.05124	9.04378	0.000342237	0.00991205
ENSG00000136689	IL1RN	IL1RN	1.05039	6.41107	0.000135584	0.00475981
ENSG00000136404	TM6SF1	TM6SF1	1.04763	5.48864	0.000123869	0.00438176
ENSG00000151247	EIF4E	EIF4E	1.04724	7.35784	0.00101527	0.0233487
ENSG00000172115	CYCS	CYCS	1.04414	9.1867	0.000638065	0.0159827
ENSG00000198223	CSF2RA	CSF2RA	1.04353	6.03429	0.00125542	0.0272488
ENSG00000197989	SNHG12	SNHG12	1.04324	5.91936	0.000270245	0.00818507
ENSG00000247774	PCED1B-AS1	PCED1B-AS1	1.03782	7.10901	0.000426606	0.0117672
ENSG00000062194	GPBP1	GPBP1	1.03773	8.05923	0.000401458	0.011207
ENSG00000138495	COX17	COX17	1.03725	8.30471	0.000645138	0.0160729
ENSG00000074695	LMAN1	LMAN1	1.03695	6.10158	0.000863933	0.0202195
ENSG00000143322	ABL2	ABL2	1.03675	5.60285	0.000172853	0.00578339
ENSG00000116717	GADD45A	GADD45A	1.03284	5.97412	0.000162268	0.00548868
ENSG00000163162	RNF149	RNF149	1.02853	6.56105	0.000177087	0.00590374
ENSG00000250479	CHCHD10	CHCHD10	1.0282	8.35151	0.000606029	0.0153928
ENSG00000185650	ZFP36L1	ZFP36L1	1.02741	8.77048	0.000503373	0.0134059
ENSG00000135549	PKIB	PKIB	1.02553	7.93897	0.00245783	0.0450782
ENSG00000164674	SYTL3	SYTL3	1.0236	5.21928	3.19967e-05	0.00143954
ENSG00000080371	RAB21	RAB21	1.01982	7.21262	0.000400779	0.011207
ENSG00000146376	ARHGAP18	ARHGAP18	1.01797	6.6505	0.000606213	0.0153928
ENSG00000196843	ARID5A	ARID5A	1.0149	6.50455	0.000191394	0.0063126
ENSG00000100600	LGMN	LGMN	1.01266	6.96625	0.000863769	0.0202195
ENSG00000187837	HIST1H1C	HIST1H1C	1.00553	6.53804	0.00260581	0.0468035
ENSG00000163599	CTLA4	CTLA4	1.00509	4.61995	0.000119823	0.00427124
ENSG00000143622	RIT1	RIT1	1.0046	6.38456	0.000352881	0.0101885
ENSG00000214182	PTMAP5	PTMAP5	1.00037	5.10319	3.69234e-05	0.00161418
ENSG00000132386	SERPINF1	SERPINF1	0.99877	7.37852	0.000379988	0.010833
ENSG00000225331	LINC01678	LINC01678	0.998019	5.67671	0.0001312	0.00462344
ENSG00000134202	GSTM3	GSTM3	0.997095	4.37916	1.83685e-07	1.48034e-05
ENSG00000156535	CD109	CD109	0.99618	4.70224	5.93232e-06	0.000312391
ENSG00000102401	ARMCX3	ARMCX3	0.990419	6.42231	0.00199095	0.0388444
ENSG00000170540	ARL6IP1	ARL6IP1	0.986521	7.79489	0.00110457	0.0250297
ENSG00000186416	NKRF	NKRF	0.986358	4.63849	3.16992e-05	0.00143311
ENSG00000157933	SKI	SKI	0.97933	5.85581	0.00217397	0.0412876
ENSG00000166579	NDEL1	NDEL1	0.976652	5.05577	6.62413e-05	0.00258182
ENSG00000165006	UBAP1	UBAP1	0.976397	5.35497	0.000233115	0.00730883
ENSG00000077150	NFKB2	NFKB2	0.975866	5.94637	0.000964638	0.0223507
ENSG00000228253	MT-ATP8	MT-ATP8	0.975168	8.01879	0.00215517	0.0410145
ENSG00000071246	VASH1	VASH1	0.974098	4.97561	5.81643e-05	0.00233597
ENSG00000060982	BCAT1	BCAT1	0.969608	5.43849	0.00256109	0.0462352
ENSG00000152766	ANKRD22	ANKRD22	0.968829	4.95885	0.000542638	0.0140873
ENSG00000163376	KBTBD8	KBTBD8	0.966143	5.22034	0.000381833	0.010833
ENSG00000269893	SNHG8	SNHG8	0.963775	8.98793	0.0012103	0.0265179
ENSG00000018280	SLC11A1	SLC11A1	0.963461	5.59381	0.000202179	0.00657473
ENSG00000145632	PLK2	PLK2	0.961939	5.45497	0.000283793	0.00853958
ENSG00000163399	ATP1A1	ATP1A1	0.958893	6.30953	0.00177072	0.0355217
ENSG00000133657	ATP13A3	ATP13A3	0.956675	6.52246	0.000709004	0.0173389
ENSG00000287553	AC090617.10	AC090617.10	0.95589	4.40288	3.28745e-06	0.000185781
ENSG00000254806	SYS1-DBNDD2	SYS1-DBNDD2	0.954693	5.56149	0.000297924	0.00887834
ENSG00000244274	DBNDD2	DBNDD2	0.954693	5.56149	0.000297924	0.00887834
ENSG00000106615	RHEB	RHEB	0.949456	7.49146	0.0014942	0.0311197
ENSG00000140836	ZFHX3	ZFHX3	0.948926	6.81674	0.00112137	0.0252254
ENSG00000113742	CPEB4	CPEB4	0.946307	6.24854	0.000634612	0.0159744
ENSG00000166128	RAB8B	RAB8B	0.944385	6.72631	0.000880786	0.0205104
ENSG00000135541	AHI1	AHI1	0.943964	5.69778	0.00135889	0.0289522
ENSG00000139132	FGD4	FGD4	0.943126	7.03394	0.000623293	0.0157403
ENSG00000120254	MTHFD1L	MTHFD1L	0.941519	5.58184	0.00118617	0.0261748
ENSG00000251230	MIR3945HG	MIR3945HG	0.941417	4.74313	3.85754e-05	0.00166287
ENSG00000140044	JDP2	JDP2	0.940579	7.97269	0.00119663	0.026343
ENSG00000089737	DDX24	DDX24	0.939173	7.2992	0.000863249	0.0202195
ENSG00000115486	GGCX	GGCX	0.937531	5.89274	0.00132717	0.0285387
ENSG00000112773	TENT5A	TENT5A	0.937225	6.16086	0.000601944	0.0153791
ENSG00000070495	JMJD6	JMJD6	0.935939	5.89468	0.000398712	0.0111978
ENSG00000137965	IFI44	IFI44	0.935644	5.72151	0.00278127	0.0491924
ENSG00000260805	AC092803.2	AC092803.2	0.932132	4.66292	4.78856e-05	0.00200816
ENSG00000135077	HAVCR2	HAVCR2	0.931664	7.63616	0.00155142	0.0318814
ENSG00000004478	FKBP4	FKBP4	0.930906	5.17662	0.000442718	0.0121036
ENSG00000070501	POLB	POLB	0.929743	5.29446	0.000234835	0.00732811
ENSG00000271503	CCL5	CCL5	0.929396	5.30657	0.00119977	0.0263495
ENSG00000011566	MAP4K3	MAP4K3	0.928272	4.72916	0.000505812	0.0134323
ENSG00000138448	ITGAV	ITGAV	0.92709	5.15955	0.000640262	0.0159945
ENSG00000112245	PTP4A1	PTP4A1	0.92377	6.12775	0.00113632	0.0254383
ENSG00000176714	CCDC121	CCDC121	0.922708	4.32284	5.20562e-06	0.000275689
ENSG00000162636	FAM102B	FAM102B	0.92265	5.38708	0.000355691	0.0102377
ENSG00000165685	TMEM52B	TMEM52B	0.922543	4.29095	1.47728e-06	9.37766e-05
ENSG00000285976	AL135905.2	AL135905.2	0.922059	6.18194	0.0011586	0.0257504
ENSG00000026297	RNASET2	RNASET2	0.920336	9.93783	0.00122898	0.0268004
ENSG00000062716	VMP1	VMP1	0.918885	8.2565	0.0021074	0.0405215
ENSG00000174373	RALGAPA1	RALGAPA1	0.917415	5.59776	0.00197695	0.0386547
ENSG00000114013	CD86	CD86	0.916187	8.32323	0.00236942	0.044136
ENSG00000287584	AC004837.4	AC004837.4	0.915628	4.64252	2.81465e-05	0.00129139
ENSG00000120306	CYSTM1	CYSTM1	0.915111	5.04525	0.000338256	0.00987149
ENSG00000083223	TUT7	TUT7	0.912934	6.4803	0.0021818	0.0413516
ENSG00000214174	AMZ2P1	AMZ2P1	0.906112	6.31971	0.00178607	0.0357523
ENSG00000166068	SPRED1	SPRED1	0.905785	4.45469	1.71185e-05	0.000813612
ENSG00000277969	AC006449.6	AC006449.6	0.904184	4.64958	5.55893e-05	0.00226961
ENSG00000258738	AL121603.2	AL121603.2	0.903264	4.71099	9.59292e-05	0.00352806
ENSG00000204054	LINC00963	LINC00963	0.903137	5.1823	0.000442624	0.0121036
ENSG00000171735	CAMTA1	CAMTA1	0.899447	6.98314	0.00242796	0.0447362
ENSG00000173511	VEGFB	VEGFB	0.8961	6.90569	0.00106777	0.024395
ENSG00000176170	SPHK1	SPHK1	0.895745	4.4476	2.29667e-05	0.00107503
ENSG00000105993	DNAJB6	DNAJB6	0.895557	7.18623	0.00111921	0.0252254
ENSG00000231006	RPL7P32	RPL7P32	0.89519	4.72453	0.000233428	0.00730883
ENSG00000267458	AC092069.1	AC092069.1	0.893748	4.62467	8.21685e-05	0.00310832
ENSG00000142512	SIGLEC10	SIGLEC10	0.890932	6.42021	0.00143201	0.0301634
ENSG00000235453	SMIM27	SMIM27	0.89006	5.38386	0.000972847	0.0224847
ENSG00000113369	ARRDC3	ARRDC3	0.888033	6.6176	0.00270207	0.0481592
ENSG00000102908	NFAT5	NFAT5	0.884097	5.31658	0.000709045	0.0173389
ENSG00000287576	AC067930.8	AC067930.8	0.881917	4.65374	0.000754204	0.0181558
ENSG00000276168	RN7SL1	RN7SL1	0.88141	4.55455	0.000136127	0.00476083
ENSG00000231881	AL109615.2	AL109615.2	0.88091	4.68394	0.00084766	0.0200924
ENSG00000168610	STAT3	STAT3	0.876155	6.97992	0.00234996	0.0439101
ENSG00000197180	AC244090.1	AC244090.1	0.875801	5.56582	0.000785557	0.0188128
ENSG00000113532	ST8SIA4	ST8SIA4	0.873561	6.54544	0.00242443	0.0447362
ENSG00000171236	LRG1	LRG1	0.871748	4.32199	7.88129e-06	0.000402469
ENSG00000270069	MIR222HG	MIR222HG	0.868246	4.39007	9.07835e-05	0.00337904
ENSG00000273272	U62317.4	U62317.4	0.866821	4.94777	0.000361904	0.0103843
ENSG00000137449	CPEB2	CPEB2	0.866311	4.78347	0.000278655	0.00841228
ENSG00000143514	TP53BP2	TP53BP2	0.864772	5.74092	0.00254103	0.0461489
ENSG00000272447	AL135925.1	AL135925.1	0.859091	4.68224	0.000153384	0.00524564
ENSG00000270433	H3F3AP2	H3F3AP2	0.857343	5.09421	0.000536491	0.0139668
ENSG00000204386	NEU1	NEU1	0.855217	6.55089	0.00150511	0.0312765
ENSG00000131188	PRR7	PRR7	0.85238	4.2959	5.51307e-05	0.00226085
ENSG00000008513	ST3GAL1	ST3GAL1	0.850555	6.03749	0.0018774	0.0372586
ENSG00000269220	LINC00528	LINC00528	0.84849	5.68234	0.0010857	0.0246624
ENSG00000127507	ADGRE2	ADGRE2	0.844425	6.4316	0.00166619	0.0337429
ENSG00000143443	C1orf56	C1orf56	0.840414	6.51021	0.00273029	0.0484758
ENSG00000184182	UBE2F	UBE2F	0.83957	6.17727	0.0023319	0.0437491
ENSG00000102984	ZNF821	ZNF821	0.831357	4.38721	4.53889e-05	0.00192084
ENSG00000280138	AC027290.2	AC027290.2	0.830908	4.96925	0.000577723	0.0148731
ENSG00000124466	LYPD3	LYPD3	0.828996	5.25367	0.00102161	0.0234363
ENSG00000115339	GALNT3	GALNT3	0.819329	5.4741	0.00152279	0.0315109
ENSG00000130202	NECTIN2	NECTIN2	0.812112	4.44021	0.000533208	0.0139205
ENSG00000226471	Z93930.2	Z93930.2	0.810706	4.50893	0.000371727	0.0106332
ENSG00000197780	TAF13	TAF13	0.810484	5.72611	0.00182652	0.0364831
ENSG00000180611	MB21D2	MB21D2	0.807589	4.43499	0.000300613	0.00890121
ENSG00000153487	ING1	ING1	0.802075	5.95923	0.00212229	0.0405555
ENSG00000231721	LINC-PINT	LINC-PINT	0.786939	4.81203	0.00155566	0.0318978
ENSG00000109790	KLHL5	KLHL5	0.785365	5.31269	0.00271344	0.0482691
ENSG00000115594	IL1R1	IL1R1	0.783019	4.64044	0.000425752	0.0117672
ENSG00000206127	GOLGA8O	GOLGA8O	0.779401	5.15293	0.00174244	0.0350302
ENSG00000164342	TLR3	TLR3	0.777284	4.87435	0.00156197	0.0319483
ENSG00000170525	PFKFB3	PFKFB3	0.777024	4.54832	0.000326607	0.0095791
ENSG00000117242	PINK1-AS	PINK1-AS	0.772388	4.92181	0.000982686	0.0226556
ENSG00000228794	LINC01128	LINC01128	0.769943	4.93732	0.0018999	0.0375443
ENSG00000265100	AC005332.1	AC005332.1	0.767996	5.25173	0.00247175	0.0451388
ENSG00000198538	ZNF28	ZNF28	0.763478	4.26761	0.000108352	0.00392266
ENSG00000237797	MACORIS	MACORIS	0.749603	4.59112	0.00134601	0.0288103
ENSG00000033170	FUT8	FUT8	0.738184	4.3632	0.000218325	0.00697736
ENSG00000222043	AC079305.1	AC079305.1	0.736308	4.26155	0.000253321	0.00774845
ENSG00000205710	C17orf107	C17orf107	0.726281	4.35037	0.00160989	0.0327923
ENSG00000125733	TRIP10	TRIP10	0.722321	4.944	0.00211479	0.0405555
ENSG00000116157	GPX7	GPX7	0.67559	4.56649	0.00223933	0.0423553
ENSG00000076554	TPD52	TPD52	0.674093	4.34663	0.00108328	0.0246624
ENSG00000114405	C3orf14	C3orf14	0.671234	4.46662	0.00206162	0.0398896
ENSG00000146094	DOK3	DOK3	0.666263	4.20781	0.000416066	0.0115799
ENSG00000183508	TENT5C	TENT5C	0.65698	4.45148	0.00163573	0.0332456
ENSG00000162616	DNAJB4	DNAJB4	0.634029	4.0289	0.000295319	0.00885764
ENSG00000186399	GOLGA8R	GOLGA8R	0.628795	4.32983	0.00196581	0.0385182
ENSG00000102096	PIM2	PIM2	0.625577	4.38828	0.00184786	0.03683
ENSG00000112033	PPARD	PPARD	0.616384	4.39975	0.00243677	0.0448095
ENSG00000173110	HSPA6	HSPA6	0.614907	4.39532	0.00246111	0.0450782
ENSG00000240240	BX664727.3	BX664727.3	0.61478	4.00153	0.000383186	0.010833
ENSG00000241743	XACT	XACT	0.604267	3.91237	0.000244922	0.00756646
ENSG00000278376	AP004609.3	AP004609.3	0.601863	4.29097	0.00268957	0.0480287
ENSG00000233834	AC005083.1	AC005083.1	0.57919	4.1917	0.00261592	0.0468942
ENSG00000214226	C17orf67	C17orf67	0.578168	3.95407	0.000701413	0.0172432
ENSG00000077585	GPR137B	GPR137B	0.557697	3.94678	0.00199765	0.0388444
ENSG00000279117	AP001972.5	AP001972.5	-0.523472	4.03686	0.0023458	0.0439101
ENSG00000105519	CAPS	CAPS	-0.555043	4.06969	0.000565255	0.0145927
ENSG00000131043	AAR2	AAR2	-0.58117	4.14483	0.00132499	0.0285387
ENSG00000100342	APOL1	APOL1	-0.582349	4.23416	0.00247416	0.0451388
ENSG00000277324	AC093462.1	AC093462.1	-0.604421	4.45233	0.00254944	0.0461489
ENSG00000164187	LMBRD2	LMBRD2	-0.6207	4.37523	0.00190622	0.037589
ENSG00000131462	TUBG1	TUBG1	-0.65984	4.49192	0.00194297	0.0382324
ENSG00000179041	RRS1	RRS1	-0.66406	4.46952	0.00156501	0.0319483
ENSG00000131779	PEX11B	PEX11B	-0.721002	4.57103	0.00115633	0.0257504
ENSG00000005156	LIG3	LIG3	-0.743496	4.85746	0.00241497	0.0446746
ENSG00000151806	GUF1	GUF1	-0.750797	4.43375	6.91053e-05	0.00266862
ENSG00000089159	PXN	PXN	-0.752036	5.06352	0.0021434	0.0408746
ENSG00000135709	KIAA0513	KIAA0513	-0.76999	4.72913	0.00173924	0.0350302
ENSG00000279369	AC046185.3	AC046185.3	-0.797546	5.05158	0.0025716	0.0462788
ENSG00000114812	VIPR1	VIPR1	-0.806748	5.15466	0.0023975	0.0445292
ENSG00000163596	ICA1L	ICA1L	-0.812241	5.49794	0.00254448	0.0461489
ENSG00000197457	STMN3	STMN3	-0.821538	4.43574	1.91413e-05	0.000905111
ENSG00000164961	WASHC5	WASHC5	-0.854877	5.2887	0.00149133	0.0311197
ENSG00000100220	RTCB	RTCB	-0.855408	6.67519	0.00274424	0.0486302
ENSG00000187713	TMEM203	TMEM203	-0.858467	6.21369	0.00229709	0.0431834
ENSG00000110931	CAMKK2	CAMKK2	-0.858797	5.08074	0.000883601	0.0205244
ENSG00000204922	UQCC3	UQCC3	-0.866264	5.99501	0.00189056	0.0374396
ENSG00000168538	TRAPPC11	TRAPPC11	-0.889313	5.35181	0.00153582	0.0317014
ENSG00000214262	ANKRD36BP1	ANKRD36BP1	-0.890422	7.19016	0.00227496	0.0429416
ENSG00000100335	MIEF1	MIEF1	-0.892232	5.1583	0.000602355	0.0153791
ENSG00000130726	TRIM28	TRIM28	-0.894175	6.78464	0.00280305	0.0494832
ENSG00000039123	MTREX	MTREX	-0.895158	5.49723	0.00253216	0.0461063
ENSG00000138744	NAAA	NAAA	-0.900444	6.7819	0.00207426	0.0400506
ENSG00000130227	XPO7	XPO7	-0.902187	4.73062	6.7265e-05	0.00260842
ENSG00000169871	TRIM56	TRIM56	-0.909477	6.30886	0.00148563	0.0310808
ENSG00000144357	UBR3	UBR3	-0.91026	4.99086	0.000217454	0.00697358
ENSG00000115234	SNX17	SNX17	-0.916081	7.61665	0.00241138	0.0446746
ENSG00000140575	IQGAP1	IQGAP1	-0.916724	8.63375	0.00166748	0.0337429
ENSG00000198146	ZNF770	ZNF770	-0.92056	5.36951	0.000726461	0.0175792
ENSG00000109906	ZBTB16	ZBTB16	-0.92215	6.91149	0.00140471	0.0296558
ENSG00000160712	IL6R	IL6R	-0.924357	7.28852	0.00138636	0.0294023
ENSG00000014216	CAPN1	CAPN1	-0.926568	6.7043	0.00146265	0.0307388
ENSG00000105383	CD33	CD33	-0.927461	7.20616	0.00152318	0.0315109
ENSG00000108604	SMARCD2	SMARCD2	-0.928299	6.14273	0.00127643	0.02764
ENSG00000165795	NDRG2	NDRG2	-0.935195	7.37923	0.0013584	0.0289522
ENSG00000213599	SLX1A-SULT1A3	SLX1A-SULT1A3	-0.939516	5.34314	0.000390286	0.0109944
ENSG00000142327	RNPEPL1	RNPEPL1	-0.940998	7.37465	0.00130436	0.0281791
ENSG00000072786	STK10	STK10	-0.94111	6.79812	0.00139266	0.0294685
ENSG00000114446	IFT57	IFT57	-0.943875	6.09397	0.0011689	0.0259171
ENSG00000108848	LUC7L3	LUC7L3	-0.948607	8.04086	0.00229383	0.0431834
ENSG00000104880	ARHGEF18	ARHGEF18	-0.950081	5.3629	0.0004627	0.0125389
ENSG00000077684	JADE1	JADE1	-0.951673	5.61955	0.000457182	0.0124257
ENSG00000132155	RAF1	RAF1	-0.951973	5.76746	0.000620387	0.0157097
ENSG00000117713	ARID1A	ARID1A	-0.952569	7.14782	0.00112795	0.025312
ENSG00000168522	FNTA	FNTA	-0.957659	6.87385	0.00106866	0.024395
ENSG00000169926	KLF13	KLF13	-0.976352	5.91877	0.000867211	0.0202451
ENSG00000090863	GLG1	GLG1	-0.98516	6.17029	0.000515551	0.0135742
ENSG00000121316	PLBD1	PLBD1	-0.98647	8.53344	0.00195861	0.0384584
ENSG00000100129	EIF3L	EIF3L	-0.986472	9.7153	0.00154947	0.0318814
ENSG00000116990	MYCL	MYCL	-0.999688	6.17742	0.000782699	0.0187929
ENSG00000198301	SDAD1	SDAD1	-1.0001	5.92141	0.00048754	0.0130972
ENSG00000188986	NELFB	NELFB	-1.00503	5.79163	0.000701253	0.0172432
ENSG00000241878	PISD	PISD	-1.007	5.73775	0.0004922	0.0131841
ENSG00000134250	NOTCH2	NOTCH2	-1.01529	6.32394	0.00111691	0.0252254
ENSG00000106263	EIF3B	EIF3B	-1.02134	7.05992	0.000528366	0.013833
ENSG00000093072	ADA2	ADA2	-1.02221	7.41646	0.000680023	0.0168065
ENSG00000132463	GRSF1	GRSF1	-1.03181	7.14405	0.00054496	0.0141081
ENSG00000001084	GCLC	GCLC	-1.03339	7.06887	0.00117289	0.0259436
ENSG00000135218	CD36	CD36	-1.03683	6.90139	0.000860173	0.0202195
ENSG00000121281	ADCY7	ADCY7	-1.03734	6.56526	0.000256068	0.00780671
ENSG00000175215	CTDSP2	CTDSP2	-1.04476	6.18168	0.000251646	0.0077227
ENSG00000189091	SF3B3	SF3B3	-1.05047	5.34347	9.23518e-05	0.00341002
ENSG00000101265	RASSF2	RASSF2	-1.05397	7.02062	0.000340473	0.00989186
ENSG00000178175	ZNF366	ZNF366	-1.06146	5.43402	0.000112095	0.00402674
ENSG00000184640	2009-09-01	2009-09-01	-1.06272	7.70939	0.00256419	0.0462352
ENSG00000133606	MKRN1	MKRN1	-1.06612	6.82961	0.000190051	0.00629068
ENSG00000086758	HUWE1	HUWE1	-1.07233	6.01505	0.000172609	0.00578339
ENSG00000145703	IQGAP2	IQGAP2	-1.07356	7.85887	0.000827645	0.0197188
ENSG00000007237	AC005747.1	AC005747.1	-1.08204	5.9672	0.00187583	0.0372586
ENSG00000196502	SULT1A1	SULT1A1	-1.08814	6.53743	0.000205635	0.00666374
ENSG00000100353	EIF3D	EIF3D	-1.09383	8.79882	0.00212083	0.0405555
ENSG00000139626	ITGB7	ITGB7	-1.1254	6.96178	0.00147089	0.0308421
ENSG00000167615	LENG8	LENG8	-1.1358	6.60529	0.000200645	0.00655
ENSG00000142765	SYTL1	SYTL1	-1.13784	6.89905	0.00203611	0.0394783
ENSG00000132424	PNISR	PNISR	-1.1566	9.22759	0.000228554	0.00722948
ENSG00000168394	TAP1	TAP1	-1.22414	7.15321	0.00051022	0.0134721
ENSG00000111371	SLC38A1	SLC38A1	-1.23248	7.95475	0.000158467	0.00537974
ENSG00000104998	IL27RA	IL27RA	-1.26932	6.83557	1.53196e-05	0.000731865
ENSG00000152234	ATP5F1A	ATP5F1A	-1.27256	9.08854	3.91994e-05	0.00168194
ENSG00000100079	LGALS2	LGALS2	-1.29054	9.29746	0.000854761	0.020209
ENSG00000272211	AC114760.2	AC114760.2	-1.30069	7.44933	4.02288e-05	0.00171028
ENSG00000158195	WASF2	WASF2	-1.33109	8.45793	1.11533e-05	0.000551854
ENSG00000106066	CPVL	CPVL	-1.33804	10.0472	6.70777e-06	0.000349256
ENSG00000143554	SLC27A3	SLC27A3	-1.34046	6.19939	3.35487e-05	0.0014877
ENSG00000085265	FCN1	FCN1	-1.39648	9.33458	0.000118582	0.00424331
ENSG00000197629	MPEG1	MPEG1	-1.4369	7.23941	0.000140469	0.0048759
ENSG00000110876	SELPLG	SELPLG	-1.43695	6.78502	1.33137e-05	0.00064603
ENSG00000181631	P2RY13	P2RY13	-1.44074	7.88928	2.45337e-05	0.0011426
ENSG00000028277	POU2F2	POU2F2	-1.52817	8.05568	6.63744e-07	4.61972e-05
ENSG00000168913	ENHO	ENHO	-1.66253	8.38233	6.63006e-05	0.00258182
ENSG00000126759	CFP	CFP	-1.91901	8.41847	6.23188e-06	0.000326311
ENSG00000283743	Z84466.1	Z84466.1	-1.92271	8.29351	6.56903e-07	4.61225e-05

## Sheet: NK cells
Significantly differentially expressed Genes in NK cell cluster Periphery vs PBMC
GeneId	Symbol	GeneName	log2FC	log2A	P.Value	adj.P.Val
ENSG00000204388	HSPA1B	HSPA1B	7.32431	10.5043	2.79501e-232	1.72117e-228
ENSG00000202198	RF00100	RF00100	5.08832	8.49829	3.16999e-64	3.90416e-61
ENSG00000173110	HSPA6	HSPA6	4.82477	8.28183	2.72068e-91	8.37696e-88
ENSG00000123358	NR4A1	NR4A1	4.47708	7.32662	2.73771e-67	4.2147e-64
ENSG00000283293	RN7SK	RN7SK	4.37816	7.36665	2.61714e-79	5.37211e-76
ENSG00000095794	CREM	CREM	3.82602	9.68854	1.34213e-28	6.35755e-26
ENSG00000130844	ZNF331	ZNF331	3.77469	8.51431	5.63055e-31	3.15208e-28
ENSG00000143184	XCL1	XCL1	3.48314	8.83454	4.09429e-26	1.4831e-23
ENSG00000188483	IER5L	IER5L	3.01076	6.47932	3.51746e-31	2.16605e-28
ENSG00000143878	RHOB	RHOB	2.99939	7.2549	2.67569e-28	1.17692e-25
ENSG00000111537	IFNG	IFNG	2.90842	8.49781	3.92673e-33	3.4544e-30
ENSG00000120694	HSPH1	HSPH1	2.79309	7.40378	8.99288e-33	6.15313e-30
ENSG00000143185	XCL2	XCL2	2.65595	10.1898	1.37966e-08	6.15649e-07
ENSG00000116741	RGS2	RGS2	2.63226	8.10368	2.65807e-18	4.54677e-16
ENSG00000151327	FAM177A1	FAM177A1	2.6065	8.38979	6.14883e-26	2.10358e-23
ENSG00000136603	SKIL	SKIL	2.54329	6.82437	4.45549e-43	4.57282e-40
ENSG00000183508	TENT5C	TENT5C	2.52298	6.74722	7.97728e-12	6.29796e-10
ENSG00000153234	NR4A2	NR4A2	2.45958	9.01124	1.54447e-12	1.33955e-10
ENSG00000275993	SIK1B	SIK1B	2.43779	5.98291	1.3844e-24	4.48692e-22
ENSG00000144655	CSRNP1	CSRNP1	2.42886	7.10242	7.80358e-16	1.09215e-13
ENSG00000123975	CKS2	CKS2	2.41857	6.96896	4.63448e-14	4.83714e-12
ENSG00000132510	KDM6B	KDM6B	2.40503	6.92499	2.79672e-14	3.02144e-12
ENSG00000142178	SIK1	SIK1	2.40338	5.84972	5.59264e-22	1.49737e-19
ENSG00000086061	DNAJA1	DNAJA1	2.40263	9.33309	1.02638e-29	5.26706e-27
ENSG00000006652	IFRD1	IFRD1	2.35384	7.0231	6.47036e-20	1.37395e-17
ENSG00000106211	HSPB1	HSPB1	2.34901	7.68132	2.09752e-14	2.34846e-12
ENSG00000115541	HSPE1	HSPE1	2.29284	9.47115	7.54046e-23	2.32171e-20
ENSG00000075426	FOSL2	FOSL2	2.26861	8.43116	1.34596e-27	5.18026e-25
ENSG00000162924	REL	REL	2.23628	9.57827	1.05143e-18	1.90433e-16
ENSG00000175197	DDIT3	DDIT3	2.19951	7.22852	4.67034e-28	1.91733e-25
ENSG00000185022	MAFF	MAFF	2.15888	8.19591	8.74803e-10	4.98799e-08
ENSG00000272196	HIST2H2AA4	HIST2H2AA4	2.15301	7.53801	4.23836e-22	1.18636e-19
ENSG00000203812	HIST2H2AA3	HIST2H2AA3	2.15301	7.53801	4.23836e-22	1.18636e-19
ENSG00000059804	SLC2A3	SLC2A3	2.13349	7.57192	8.55865e-33	6.15313e-30
ENSG00000144381	HSPD1	HSPD1	2.10106	8.88343	2.09633e-12	1.79295e-10
ENSG00000174373	RALGAPA1	RALGAPA1	1.98071	6.63805	8.79551e-19	1.6413e-16
ENSG00000196428	TSC22D2	TSC22D2	1.95569	5.93868	2.02833e-20	4.6261e-18
ENSG00000161835	GRASP	GRASP	1.92992	8.10074	7.26649e-08	2.81428e-06
ENSG00000139722	VPS37B	VPS37B	1.89524	7.1438	2.70652e-21	6.41029e-19
ENSG00000115457	IGFBP2	IGFBP2	1.88473	7.9677	0.000422047	0.00611521
ENSG00000116044	NFE2L2	NFE2L2	1.87212	6.64561	6.32076e-17	9.98032e-15
ENSG00000197019	SERTAD1	SERTAD1	1.86211	8.80143	3.3506e-11	2.37161e-09
ENSG00000134107	BHLHE40	BHLHE40	1.84243	7.55226	6.06991e-22	1.55744e-19
ENSG00000156966	B3GNT7	B3GNT7	1.84214	6.04469	2.05668e-11	1.49e-09
ENSG00000155307	SAMSN1	SAMSN1	1.83787	6.78654	1.5445e-11	1.15988e-09
ENSG00000158050	DUSP2	DUSP2	1.83385	10.628	1.82329e-13	1.70119e-11
ENSG00000154640	BTG3	BTG3	1.75803	6.18952	2.35045e-19	4.52316e-17
ENSG00000139112	GABARAPL1	GABARAPL1	1.75544	8.01018	6.80985e-22	1.6774e-19
ENSG00000116161	CACYBP	CACYBP	1.75411	8.33525	9.4994e-13	8.60254e-11
ENSG00000204386	NEU1	NEU1	1.74737	6.83762	4.50462e-14	4.78266e-12
ENSG00000184205	TSPYL2	TSPYL2	1.72621	6.52019	8.15667e-14	7.856e-12
ENSG00000137575	SDCBP	SDCBP	1.72543	8.14468	5.72112e-14	5.77551e-12
ENSG00000116717	GADD45A	GADD45A	1.71806	7.00532	3.08415e-10	1.84673e-08
ENSG00000001630	CYP51A1	CYP51A1	1.71195	5.80204	2.11728e-17	3.52384e-15
ENSG00000164169	PRMT9	PRMT9	1.70851	6.37839	3.34287e-20	7.35193e-18
ENSG00000139289	PHLDA1	PHLDA1	1.70541	5.79626	1.18856e-09	6.53495e-08
ENSG00000108106	UBE2S	UBE2S	1.70423	8.26914	3.01425e-17	4.88467e-15
ENSG00000159388	BTG2	BTG2	1.70062	9.4146	1.1791e-11	8.96407e-10
ENSG00000171522	PTGER4	PTGER4	1.67083	7.67544	1.13214e-15	1.51559e-13
ENSG00000119801	YPEL5	YPEL5	1.67017	8.833	1.91765e-09	9.84072e-08
ENSG00000118503	TNFAIP3	TNFAIP3	1.66152	8.60944	8.93679e-06	0.000227408
ENSG00000186834	HEXIM1	HEXIM1	1.65608	6.80558	1.11516e-12	9.81026e-11
ENSG00000140968	IRF8	IRF8	1.64054	6.91351	7.43706e-10	4.32051e-08
ENSG00000143384	MCL1	MCL1	1.60235	9.20135	1.3198e-18	2.32209e-16
ENSG00000163659	TIPARP	TIPARP	1.59579	7.4704	5.317e-16	7.79574e-14
ENSG00000141682	PMAIP1	PMAIP1	1.58974	8.48102	2.11686e-08	9.2451e-07
ENSG00000282885	AL627171.2	AL627171.2	1.58809	4.58478	7.89571e-10	4.54409e-08
ENSG00000188486	H2AFX	H2AFX	1.5849	7.71887	4.93793e-16	7.41653e-14
ENSG00000163874	ZC3H12A	ZC3H12A	1.58251	6.18045	1.13554e-08	5.33792e-07
ENSG00000285976	AL135905.2	AL135905.2	1.57414	5.88051	1.8884e-14	2.15347e-12
ENSG00000059728	MXD1	MXD1	1.53415	6.01552	1.87818e-11	1.37689e-09
ENSG00000112245	PTP4A1	PTP4A1	1.52976	5.80379	1.00577e-14	1.19106e-12
ENSG00000274012	RN7SL2	RN7SL2	1.52473	4.08833	3.91743e-08	1.58708e-06
ENSG00000134480	CCNH	CCNH	1.52159	7.19871	7.73028e-13	7.10493e-11
ENSG00000070495	JMJD6	JMJD6	1.51869	6.15027	2.3754e-16	3.65692e-14
ENSG00000185650	ZFP36L1	ZFP36L1	1.50611	7.89351	2.81618e-12	2.34352e-10
ENSG00000105849	TWISTNB	TWISTNB	1.49248	6.62981	1.74066e-15	2.28063e-13
ENSG00000113448	PDE4D	PDE4D	1.49136	7.11453	5.52908e-10	3.24267e-08
ENSG00000101665	SMAD7	SMAD7	1.48376	8.09182	6.74675e-16	9.66197e-14
ENSG00000023445	BIRC3	BIRC3	1.46924	5.28486	6.02251e-08	2.37735e-06
ENSG00000169895	SYAP1	SYAP1	1.46562	8.32675	2.54396e-15	3.26368e-13
ENSG00000117036	ETV3	ETV3	1.46388	5.73637	1.21057e-08	5.52199e-07
ENSG00000197989	SNHG12	SNHG12	1.45596	6.6389	8.16473e-14	7.856e-12
ENSG00000113368	LMNB1	LMNB1	1.45406	5.92155	2.82766e-07	1.00073e-05
ENSG00000107968	MAP3K8	MAP3K8	1.4529	8.03592	1.68437e-11	1.24968e-09
ENSG00000118971	CCND2	CCND2	1.45056	7.36792	1.23337e-19	2.45002e-17
ENSG00000273702	AC091271.1	AC091271.1	1.44718	6.1492	1.18799e-08	5.50047e-07
ENSG00000141232	TOB1	TOB1	1.43872	6.93235	9.18119e-14	8.69812e-12
ENSG00000154124	OTULIN	OTULIN	1.43318	6.96289	1.70831e-10	1.06261e-08
ENSG00000153922	CHD1	CHD1	1.42918	8.03575	5.20761e-15	6.28793e-13
ENSG00000034677	RNF19A	RNF19A	1.42857	7.454	8.20891e-20	1.68502e-17
ENSG00000092820	EZR	EZR	1.42193	7.86115	1.8042e-14	2.09628e-12
ENSG00000179841	AKAP5	AKAP5	1.41584	5.59335	5.86266e-12	4.7503e-10
ENSG00000269821	KCNQ1OT1	KCNQ1OT1	1.41389	6.03042	3.77549e-08	1.5397e-06
ENSG00000110848	CD69	CD69	1.41328	10.2571	7.59288e-05	0.00146115
ENSG00000285772	AC000120.2	AC000120.2	1.39674	5.39683	2.30855e-14	2.53858e-12
ENSG00000260708	AL118516.1	AL118516.1	1.39426	7.10269	4.96868e-11	3.36232e-09
ENSG00000179094	AC129492.1	AC129492.1	1.38898	5.85576	5.27796e-05	0.00107266
ENSG00000235576	LINC01871	LINC01871	1.38346	7.12545	9.31919e-12	7.17345e-10
ENSG00000134294	SLC38A2	SLC38A2	1.38043	7.50262	1.80077e-08	7.9208e-07
ENSG00000125735	TNFSF14	TNFSF14	1.37514	6.55476	8.95437e-05	0.00169665
ENSG00000113811	SELENOK	SELENOK	1.37429	9.44281	4.74161e-09	2.28116e-07
ENSG00000127824	TUBA4A	TUBA4A	1.37308	8.9658	1.54166e-09	8.18409e-08
ENSG00000135048	CEMIP2	CEMIP2	1.37143	9.69634	1.33942e-05	0.000327306
ENSG00000153201	RANBP2	RANBP2	1.36596	6.68524	5.5327e-11	3.7033e-09
ENSG00000272211	AC114760.2	AC114760.2	1.36534	6.7843	2.92685e-09	1.47734e-07
ENSG00000178381	ZFAND2A	ZFAND2A	1.36451	6.74156	1.06023e-09	5.98979e-08
ENSG00000102804	TSC22D1	TSC22D1	1.36396	5.63422	2.89708e-08	1.22193e-06
ENSG00000177426	TGIF1	TGIF1	1.34953	5.62126	1.67157e-10	1.05036e-08
ENSG00000182481	KPNA2	KPNA2	1.3467	5.78635	3.54956e-08	1.45721e-06
ENSG00000120705	ETF1	ETF1	1.33772	6.6745	5.15367e-14	5.28939e-12
ENSG00000107372	ZFAND5	ZFAND5	1.33086	7.42541	4.73298e-11	3.23841e-09
ENSG00000069849	ATP1B3	ATP1B3	1.32565	8.44471	4.78771e-08	1.91446e-06
ENSG00000108256	NUFIP2	NUFIP2	1.28959	7.46773	1.04472e-15	1.42964e-13
ENSG00000147872	PLIN2	PLIN2	1.27867	6.64452	9.22374e-07	2.89795e-05
ENSG00000188229	TUBB4B	TUBB4B	1.27793	8.98452	3.05837e-07	1.07008e-05
ENSG00000134333	LDHA	LDHA	1.27159	9.92835	3.52025e-12	2.89036e-10
ENSG00000144802	NFKBIZ	NFKBIZ	1.26824	6.71564	0.0002536	0.00407746
ENSG00000135604	STX11	STX11	1.25791	6.09865	1.76378e-05	0.000409863
ENSG00000176105	YES1	YES1	1.25079	6.67069	1.07217e-12	9.56871e-11
ENSG00000110172	CHORDC1	CHORDC1	1.25056	7.28197	1.20296e-10	7.79769e-09
ENSG00000165030	NFIL3	NFIL3	1.24868	7.73742	6.50252e-14	6.45847e-12
ENSG00000135541	AHI1	AHI1	1.24428	6.13705	2.80081e-05	0.000615978
ENSG00000081320	STK17B	STK17B	1.24251	8.76397	4.27611e-15	5.26646e-13
ENSG00000148841	ITPRIP	ITPRIP	1.23932	6.08114	3.07205e-09	1.53803e-07
ENSG00000126804	ZBTB1	ZBTB1	1.23925	7.65183	1.96847e-09	1.0018e-07
ENSG00000123505	AMD1	AMD1	1.23362	7.65298	2.67312e-08	1.13525e-06
ENSG00000143319	ISG20L2	ISG20L2	1.22909	6.80251	6.50245e-09	3.10404e-07
ENSG00000141543	EIF4A3	EIF4A3	1.22746	7.30825	1.26847e-06	3.92525e-05
ENSG00000269893	SNHG8	SNHG8	1.22132	8.52478	4.12461e-15	5.18354e-13
ENSG00000109320	NFKB1	NFKB1	1.21951	6.62409	4.22055e-06	0.000117073
ENSG00000180747	SMG1P3	SMG1P3	1.20145	4.72989	1.16703e-08	5.44435e-07
ENSG00000181218	HIST3H2A	HIST3H2A	1.19697	6.60725	4.12075e-09	2.03005e-07
ENSG00000132661	NXT1	NXT1	1.19345	7.26673	1.95351e-07	6.994e-06
ENSG00000170340	B3GNT2	B3GNT2	1.19056	6.18322	3.69944e-10	2.1905e-08
ENSG00000155090	KLF10	KLF10	1.18779	5.7423	5.52668e-06	0.000149926
ENSG00000013441	CLK1	CLK1	1.1832	7.81363	1.29133e-10	8.28336e-09
ENSG00000027697	IFNGR1	IFNGR1	1.18268	7.75052	9.54135e-11	6.31781e-09
ENSG00000232956	SNHG15	SNHG15	1.18249	7.43076	2.46768e-11	1.76697e-09
ENSG00000169499	PLEKHA2	PLEKHA2	1.17964	6.6497	7.89651e-12	6.29796e-10
ENSG00000135272	MDFIC	MDFIC	1.17947	6.25425	2.11763e-05	0.000482976
ENSG00000263934	SNORD3A	SNORD3A	1.17851	5.45892	0.000631328	0.00823669
ENSG00000255112	CHMP1B	CHMP1B	1.17604	6.5959	2.41898e-08	1.04168e-06
ENSG00000271869	AC026979.2	AC026979.2	1.17565	6.53871	4.01915e-08	1.61764e-06
ENSG00000145675	PIK3R1	PIK3R1	1.17284	9.22875	9.36678e-08	3.51711e-06
ENSG00000086619	ERO1B	ERO1B	1.16989	6.20709	1.19862e-08	5.5083e-07
ENSG00000051108	HERPUD1	HERPUD1	1.16401	8.44729	6.7183e-08	2.61844e-06
ENSG00000196352	CD55	CD55	1.16247	7.54516	1.1715e-09	6.49921e-08
ENSG00000181788	SIAH2	SIAH2	1.1611	6.67223	3.83221e-11	2.68168e-09
ENSG00000185112	FAM43A	FAM43A	1.14769	6.47673	3.29915e-06	9.36229e-05
ENSG00000164430	CGAS	CGAS	1.1468	5.57645	0.000218635	0.00366854
ENSG00000164305	CASP3	CASP3	1.1439	6.12472	1.63229e-08	7.23138e-07
ENSG00000065911	MTHFD2	MTHFD2	1.1392	5.83854	1.5241e-07	5.55349e-06
ENSG00000280138	AC027290.2	AC027290.2	1.13829	7.22835	4.06886e-07	1.38431e-05
ENSG00000131188	PRR7	PRR7	1.13828	6.49825	1.73645e-05	0.000407997
ENSG00000150977	RILPL2	RILPL2	1.1368	6.81693	8.17501e-06	0.000210635
ENSG00000161547	SRSF2	SRSF2	1.13415	8.77591	1.98956e-10	1.22517e-08
ENSG00000186480	INSIG1	INSIG1	1.13146	6.06526	2.29135e-08	9.93672e-07
ENSG00000156030	ELMSAN1	ELMSAN1	1.12733	6.15052	1.343e-06	4.13509e-05
ENSG00000152409	JMY	JMY	1.11888	6.06057	8.36041e-08	3.17799e-06
ENSG00000267519	AC020916.1	AC020916.1	1.1155	8.29296	0.00318574	0.0283085
ENSG00000143924	EML4	EML4	1.10541	6.7216	7.72449e-08	2.97296e-06
ENSG00000072364	AFF4	AFF4	1.1045	6.76795	1.11993e-10	7.3367e-09
ENSG00000100221	JOSD1	JOSD1	1.10103	6.80571	1.68251e-09	8.78043e-08
ENSG00000126860	EVI2A	EVI2A	1.09701	6.77465	5.7271e-07	1.88596e-05
ENSG00000053254	FOXN3	FOXN3	1.09234	6.51413	1.03703e-06	3.24163e-05
ENSG00000136527	TRA2B	TRA2B	1.09124	8.5072	2.14024e-12	1.80542e-10
ENSG00000104660	LEPROTL1	LEPROTL1	1.08644	7.20179	1.66424e-09	8.75929e-08
ENSG00000164687	FABP5	FABP5	1.08536	6.44816	6.71028e-05	0.00132019
ENSG00000105993	DNAJB6	DNAJB6	1.08354	8.04881	1.22776e-06	3.81847e-05
ENSG00000112297	CRYBG1	CRYBG1	1.08111	6.63886	1.53238e-05	0.000370055
ENSG00000164691	TAGAP	TAGAP	1.0772	7.47006	7.52835e-06	0.00019561
ENSG00000205268	PDE7A	PDE7A	1.07276	6.24648	8.9273e-08	3.37266e-06
ENSG00000205189	ZBTB10	ZBTB10	1.0687	5.42155	5.58558e-06	0.00015086
ENSG00000100644	HIF1A	HIF1A	1.06829	5.83167	7.06336e-06	0.000184306
ENSG00000023902	PLEKHO1	PLEKHO1	1.06432	6.45322	3.1902e-08	1.33641e-06
ENSG00000138767	CNOT6L	CNOT6L	1.06299	8.62815	4.14748e-11	2.86969e-09
ENSG00000126524	SBDS	SBDS	1.06296	7.7588	4.26649e-09	2.08516e-07
ENSG00000089737	DDX24	DDX24	1.05836	8.45202	1.8955e-09	9.8088e-08
ENSG00000105835	NAMPT	NAMPT	1.0482	5.33019	3.05894e-06	8.92745e-05
ENSG00000154734	ADAMTS1	ADAMTS1	1.04494	5.74557	0.000185047	0.00316532
ENSG00000117143	UAP1	UAP1	1.04443	7.02485	0.000235687	0.00387029
ENSG00000143507	DUSP10	DUSP10	1.04256	5.60537	8.73525e-07	2.77277e-05
ENSG00000113369	ARRDC3	ARRDC3	1.03916	6.77501	7.60323e-06	0.000196726
ENSG00000128016	ZFP36	ZFP36	1.03669	10.3836	0.00315004	0.028226
ENSG00000115816	CEBPZ	CEBPZ	1.03649	7.64758	1.44014e-09	7.7793e-08
ENSG00000135070	ISCA1	ISCA1	1.03239	7.6924	1.63889e-10	1.04044e-08
ENSG00000102007	PLP2	PLP2	1.02983	6.32488	3.96777e-06	0.000110559
ENSG00000131669	NINJ1	NINJ1	1.02955	5.54102	9.98098e-08	3.72502e-06
ENSG00000104312	RIPK2	RIPK2	1.01938	5.84623	2.99219e-07	1.05291e-05
ENSG00000117560	FASLG	FASLG	1.01929	6.68911	0.0050581	0.0409406
ENSG00000006634	DBF4	DBF4	1.01758	6.22238	2.52176e-08	1.0784e-06
ENSG00000102393	GLA	GLA	1.01005	5.81508	0.00404893	0.0347745
ENSG00000185950	IRS2	IRS2	1.00152	6.60079	6.21101e-08	2.43614e-06
ENSG00000150787	PTS	PTS	1.00035	4.778	1.9204e-06	5.74069e-05
ENSG00000168209	DDIT4	DDIT4	0.997467	10.6452	1.09524e-09	6.13137e-08
ENSG00000164442	CITED2	CITED2	0.997015	7.74668	6.78064e-07	2.19764e-05
ENSG00000070756	PABPC1	PABPC1	0.995348	8.95979	1.49569e-09	8.00909e-08
ENSG00000260302	AP005482.1	AP005482.1	0.994558	5.68517	3.06832e-05	0.000670025
ENSG00000109971	HSPA8	HSPA8	0.989599	10.4442	4.62009e-09	2.2402e-07
ENSG00000131979	GCH1	GCH1	0.987858	6.37905	3.23634e-08	1.34658e-06
ENSG00000146278	PNRC1	PNRC1	0.986302	10.4336	2.05586e-10	1.25347e-08
ENSG00000173598	NUDT4	NUDT4	0.979672	6.21993	4.97632e-06	0.000136804
ENSG00000178573	MAF	MAF	0.976504	5.90123	0.000462857	0.00656745
ENSG00000129657	SEC14L1	SEC14L1	0.967974	7.08696	7.03445e-07	2.26796e-05
ENSG00000015568	RGPD5	RGPD5	0.965371	4.55782	5.85612e-06	0.000156112
ENSG00000080822	CLDND1	CLDND1	0.965303	5.91947	0.000175925	0.00304311
ENSG00000173905	GOLIM4	GOLIM4	0.956962	6.2581	2.53186e-05	0.000564899
ENSG00000062194	GPBP1	GPBP1	0.955966	8.876	2.19502e-07	7.81326e-06
ENSG00000166128	RAB8B	RAB8B	0.955388	7.9592	5.64993e-06	0.000151931
ENSG00000246705	H2AFJ	H2AFJ	0.951152	7.88974	3.67084e-05	0.000779484
ENSG00000116560	SFPQ	SFPQ	0.947754	8.74743	3.08888e-10	1.84673e-08
ENSG00000109929	SC5D	SC5D	0.947448	5.24046	0.000152909	0.00269803
ENSG00000278743	AC087239.1	AC087239.1	0.941271	5.58265	0.00104547	0.0122396
ENSG00000187189	TSPYL4	TSPYL4	0.937647	5.73205	5.83937e-06	0.000156112
ENSG00000142684	ZNF593	ZNF593	0.934466	5.99539	1.57163e-06	4.81498e-05
ENSG00000214756	CSKMT	CSKMT	0.931803	5.2977	2.84606e-06	8.34573e-05
ENSG00000213639	PPP1CB	PPP1CB	0.92957	7.23497	5.28737e-08	2.10062e-06
ENSG00000163961	RNF168	RNF168	0.928721	7.26793	8.44386e-06	0.000216655
ENSG00000155926	SLA	SLA	0.926819	8.68541	1.34657e-08	6.05268e-07
ENSG00000106829	TLE4	TLE4	0.926799	8.14857	1.89416e-06	5.7263e-05
ENSG00000115339	GALNT3	GALNT3	0.923201	5.85141	7.75358e-07	2.47391e-05
ENSG00000065989	PDE4A	PDE4A	0.919442	6.02411	8.06142e-08	3.08337e-06
ENSG00000164548	TRA2A	TRA2A	0.916638	8.17211	3.25782e-09	1.61788e-07
ENSG00000169045	HNRNPH1	HNRNPH1	0.916249	9.43033	3.1343e-06	9.0615e-05
ENSG00000120690	ELF1	ELF1	0.914194	8.80091	8.14902e-09	3.86013e-07
ENSG00000077150	NFKB2	NFKB2	0.911823	5.21673	0.000115116	0.00210352
ENSG00000204569	PPP1R10	PPP1R10	0.911586	8.09377	1.5842e-05	0.000381074
ENSG00000094975	SUCO	SUCO	0.909936	5.98767	3.21459e-06	9.16455e-05
ENSG00000067334	DNTTIP2	DNTTIP2	0.909529	7.99077	6.26721e-06	0.000164929
ENSG00000164674	SYTL3	SYTL3	0.909418	8.78308	1.403e-07	5.14265e-06
ENSG00000186469	GNG2	GNG2	0.908746	5.7972	6.34365e-05	0.00126013
ENSG00000115539	PDCL3	PDCL3	0.908735	7.06226	7.1138e-07	2.2816e-05
ENSG00000132334	PTPRE	PTPRE	0.90745	8.08993	0.000226423	0.00374815
ENSG00000171791	BCL2	BCL2	0.901675	6.80507	7.32048e-05	0.00142627
ENSG00000255198	SNHG9	SNHG9	0.901036	7.18645	9.04073e-07	2.85502e-05
ENSG00000176845	METRNL	METRNL	0.900497	9.88829	0.000389757	0.00577888
ENSG00000026508	CD44	CD44	0.899251	7.27803	0.00144294	0.0159814
ENSG00000197780	TAF13	TAF13	0.897418	5.7571	0.00075105	0.00940034
ENSG00000065154	OAT	OAT	0.89714	6.16197	7.52518e-05	0.00145267
ENSG00000181222	POLR2A	POLR2A	0.896848	6.88451	1.37697e-05	0.000335154
ENSG00000164032	H2AFZ	H2AFZ	0.896662	9.52709	1.15885e-05	0.000286593
ENSG00000100425	BRD1	BRD1	0.895713	7.3507	3.42315e-08	1.41475e-06
ENSG00000224376	AC017104.1	AC017104.1	0.891395	6.54241	3.37585e-06	9.53599e-05
ENSG00000239569	KMT2E-AS1	KMT2E-AS1	0.890907	5.49197	0.00186199	0.0194013
ENSG00000163602	RYBP	RYBP	0.887957	5.72693	4.15546e-05	0.000871286
ENSG00000170892	TSEN34	TSEN34	0.884828	5.28341	0.00370926	0.0323078
ENSG00000135241	PNPLA8	PNPLA8	0.880753	6.13157	1.65736e-06	5.05249e-05
ENSG00000168421	RHOH	RHOH	0.879882	7.04524	3.91472e-06	0.000109577
ENSG00000174953	DHX36	DHX36	0.876458	8.30436	4.50248e-07	1.50686e-05
ENSG00000149646	CNBD2	CNBD2	0.873562	5.51674	0.000100794	0.00187519
ENSG00000111276	CDKN1B	CDKN1B	0.867073	7.28781	6.72232e-07	2.19027e-05
ENSG00000164543	STK17A	STK17A	0.86471	9.23065	3.58801e-05	0.000767186
ENSG00000090621	PABPC4	PABPC4	0.8643	6.45983	5.42867e-05	0.00109966
ENSG00000196950	SLC39A10	SLC39A10	0.864101	5.58206	7.34214e-05	0.00142627
ENSG00000008294	SPAG9	SPAG9	0.862823	6.77488	3.6702e-05	0.000779484
ENSG00000185477	GPRIN3	GPRIN3	0.862029	6.55172	3.13191e-06	9.0615e-05
ENSG00000015153	YAF2	YAF2	0.861844	6.95522	2.56381e-05	0.000569962
ENSG00000141526	SLC16A3	SLC16A3	0.859506	5.35072	0.000423915	0.00612285
ENSG00000167460	TPM4	TPM4	0.858583	8.30008	1.30601e-08	5.91353e-07
ENSG00000144136	SLC20A1	SLC20A1	0.858186	6.84966	0.000244477	0.00396182
ENSG00000067064	IDI1	IDI1	0.858128	8.54122	1.67135e-05	0.000396607
ENSG00000187837	HIST1H1C	HIST1H1C	0.857756	6.71117	0.00393529	0.0340837
ENSG00000112096	SOD2	SOD2	0.856127	6.20176	5.24498e-05	0.00107266
ENSG00000107362	ABHD17B	ABHD17B	0.854222	4.78809	2.39147e-05	0.000541421
ENSG00000055044	NOP58	NOP58	0.854174	6.83804	3.20673e-06	9.16455e-05
ENSG00000095380	NANS	NANS	0.85265	5.81556	5.88231e-05	0.00117608
ENSG00000183864	TOB2	TOB2	0.85128	5.64874	0.00169228	0.0180566
ENSG00000180008	SOCS4	SOCS4	0.850832	5.66114	0.000204714	0.00345377
ENSG00000197451	HNRNPAB	HNRNPAB	0.849921	8.10057	1.19816e-05	0.00029513
ENSG00000204256	BRD2	BRD2	0.849229	8.36973	0.00097978	0.0116702
ENSG00000011198	ABHD5	ABHD5	0.848728	5.35099	0.00013531	0.00244352
ENSG00000055483	AC022966.1	AC022966.1	0.848194	5.21115	1.04852e-05	0.000264622
ENSG00000171940	ZNF217	ZNF217	0.845035	6.16076	0.000202829	0.00343138
ENSG00000136738	STAM	STAM	0.844129	5.70372	7.7395e-05	0.00148012
ENSG00000168564	CDKN2AIP	CDKN2AIP	0.843402	6.35437	4.73647e-07	1.5766e-05
ENSG00000168906	MAT2A	MAT2A	0.841464	6.93066	7.47519e-05	0.00144755
ENSG00000152484	USP12	USP12	0.837098	5.8487	1.89699e-06	5.7263e-05
ENSG00000221914	PPP2R2A	PPP2R2A	0.833967	6.66201	4.66432e-06	0.000128802
ENSG00000117000	RLF	RLF	0.831189	5.62549	0.000442881	0.00632837
ENSG00000179820	MYADM	MYADM	0.830839	6.27519	0.00109552	0.012712
ENSG00000169252	ADRB2	ADRB2	0.829485	7.26819	0.000143255	0.002557
ENSG00000008083	JARID2	JARID2	0.826385	7.25955	1.21229e-07	4.49714e-06
ENSG00000214765	SEPT7P2	SEPT7P2	0.82357	5.3317	1.7425e-05	0.000407997
ENSG00000166012	TAF1D	TAF1D	0.823269	8.13892	6.04329e-07	1.9795e-05
ENSG00000174738	NR1D2	NR1D2	0.821686	6.01056	0.000231439	0.00382092
ENSG00000044574	HSPA5	HSPA5	0.819515	9.76814	1.32341e-07	4.87996e-06
ENSG00000139163	ETNK1	ETNK1	0.819311	7.17871	3.18055e-06	9.15226e-05
ENSG00000122644	ARL4A	ARL4A	0.818126	7.05001	5.23049e-06	0.000143153
ENSG00000168003	SLC3A2	SLC3A2	0.815078	8.01698	1.33522e-05	0.000327306
ENSG00000107771	CCSER2	CCSER2	0.812845	7.6403	3.53478e-07	1.20929e-05
ENSG00000163584	RPL22L1	RPL22L1	0.811919	8.61155	3.25767e-07	1.12701e-05
ENSG00000178607	ERN1	ERN1	0.806229	6.40566	3.43268e-05	0.000741701
ENSG00000110852	CLEC2B	CLEC2B	0.80577	9.44266	0.00178544	0.0187624
ENSG00000185115	NSMCE3	NSMCE3	0.802189	7.07375	4.2411e-05	0.000882322
ENSG00000103121	CMC2	CMC2	0.801661	5.99595	3.15244e-05	0.000685961
ENSG00000104852	SNRNP70	SNRNP70	0.800274	7.60803	5.48273e-07	1.8152e-05
ENSG00000105281	SLC1A5	SLC1A5	0.799799	7.23894	3.47925e-05	0.000749133
ENSG00000168556	ING2	ING2	0.79884	5.7668	0.00207567	0.0211691
ENSG00000151729	SLC25A4	SLC25A4	0.798261	5.91715	0.00015473	0.00272236
ENSG00000121741	ZMYM2	ZMYM2	0.796879	5.81182	2.41304e-05	0.000542316
ENSG00000112773	TENT5A	TENT5A	0.795195	5.88299	0.000545662	0.00740387
ENSG00000228253	MT-ATP8	MT-ATP8	0.791647	7.89412	1.68097e-05	0.000396607
ENSG00000181350	LRRC75A	LRRC75A	0.79122	5.49195	1.77551e-05	0.000411037
ENSG00000164211	STARD4	STARD4	0.789699	5.60537	0.000328631	0.00501247
ENSG00000245904	AC025164.1	AC025164.1	0.788241	5.80958	0.00276769	0.0258193
ENSG00000241058	NSUN6	NSUN6	0.787808	5.13954	5.5401e-05	0.00111856
ENSG00000139496	NUP58	NUP58	0.786203	5.18966	0.000102601	0.00189734
ENSG00000033867	SLC4A7	SLC4A7	0.785168	6.26387	0.000236319	0.00387036
ENSG00000117222	RBBP5	RBBP5	0.783756	5.45954	0.000734168	0.00926436
ENSG00000153147	SMARCA5	SMARCA5	0.783245	7.88371	6.8955e-05	0.00135231
ENSG00000088986	DYNLL1	DYNLL1	0.78243	9.31649	0.000209122	0.00351851
ENSG00000113575	PPP2CA	PPP2CA	0.782383	6.04552	2.70772e-05	0.000599789
ENSG00000114796	KLHL24	KLHL24	0.781759	6.52828	1.79867e-05	0.000414838
ENSG00000143013	LMO4	LMO4	0.777669	7.02889	0.000554669	0.00747408
ENSG00000104131	EIF3J	EIF3J	0.775782	7.11691	0.000184809	0.00316532
ENSG00000116752	BCAS2	BCAS2	0.775653	7.76517	0.000869952	0.0105873
ENSG00000180776	ZDHHC20	ZDHHC20	0.774968	6.42905	1.40618e-05	0.000340915
ENSG00000281179	AC135068.8	AC135068.8	0.772613	6.67832	0.000315669	0.00484761
ENSG00000197728	RPS26	RPS26	0.771554	11.71	3.81683e-06	0.000107324
ENSG00000213626	LBH	LBH	0.771032	7.81443	0.000125045	0.00226479
ENSG00000117020	AKT3	AKT3	0.77075	5.46909	0.000646901	0.00836894
ENSG00000135002	RFK	RFK	0.767893	5.55748	0.0016808	0.0179694
ENSG00000184203	PPP1R2	PPP1R2	0.767525	7.85221	3.78036e-05	0.000797242
ENSG00000134744	TUT4	TUT4	0.767519	6.67852	1.97865e-05	0.000452957
ENSG00000132819	RBM38	RBM38	0.760311	8.34177	5.72341e-05	0.00114804
ENSG00000012660	ELOVL5	ELOVL5	0.759018	5.99585	4.62127e-05	0.000958175
ENSG00000251022	THAP9-AS1	THAP9-AS1	0.758865	4.8841	0.000996652	0.0118254
ENSG00000165732	DDX21	DDX21	0.756917	7.76079	2.1629e-06	6.43436e-05
ENSG00000102543	CDADC1	CDADC1	0.755294	5.43338	0.000123705	0.00224712
ENSG00000128590	DNAJB9	DNAJB9	0.754772	5.79867	0.00544647	0.0430948
ENSG00000120709	FAM53C	FAM53C	0.753945	5.45765	0.00246158	0.0239726
ENSG00000121579	NAA50	NAA50	0.750845	6.23885	0.000162094	0.00284381
ENSG00000080371	RAB21	RAB21	0.750453	7.03666	0.00130542	0.0146961
ENSG00000007392	LUC7L	LUC7L	0.749884	6.2454	1.75647e-05	0.000409709
ENSG00000242114	MTFP1	MTFP1	0.749301	5.95906	0.00102043	0.0120458
ENSG00000114120	SLC25A36	SLC25A36	0.747245	7.03427	3.53466e-05	0.000758411
ENSG00000173674	EIF1AX	EIF1AX	0.746999	7.81399	7.62561e-05	0.00146288
ENSG00000086062	B4GALT1	B4GALT1	0.743475	6.22701	0.00102306	0.0120458
ENSG00000116679	IVNS1ABP	IVNS1ABP	0.74298	7.15338	1.60745e-05	0.000383669
ENSG00000169641	LUZP1	LUZP1	0.742877	6.44644	0.00149984	0.0163759
ENSG00000173575	CHD2	CHD2	0.741359	7.4187	2.59248e-06	7.63851e-05
ENSG00000047365	ARAP2	ARAP2	0.739813	7.63096	5.94979e-06	0.000157926
ENSG00000173230	GOLGB1	GOLGB1	0.734393	7.52581	2.45712e-05	0.000550216
ENSG00000250479	CHCHD10	CHCHD10	0.73149	6.66879	0.00325992	0.0287436
ENSG00000171612	SLC25A33	SLC25A33	0.731083	5.3347	0.000572617	0.0076656
ENSG00000145354	CISD2	CISD2	0.728439	6.35993	0.000442925	0.00632837
ENSG00000172123	SLFN12	SLFN12	0.728119	5.57723	0.000407954	0.00595405
ENSG00000068878	PSME4	PSME4	0.727355	5.88387	0.000509693	0.00702168
ENSG00000222041	CYTOR	CYTOR	0.726535	6.37635	4.2051e-05	0.000877797
ENSG00000132823	OSER1	OSER1	0.725891	6.24913	0.000337079	0.00512527
ENSG00000111711	GOLT1B	GOLT1B	0.722399	5.45386	0.000393788	0.00578985
ENSG00000129187	DCTD	DCTD	0.721215	6.08021	0.000194864	0.0033057
ENSG00000196781	TLE1	TLE1	0.718281	7.98235	6.51014e-05	0.00128905
ENSG00000173559	NABP1	NABP1	0.718235	5.6965	0.00186805	0.0194315
ENSG00000143321	HDGF	HDGF	0.717287	7.22807	2.72949e-05	0.000602444
ENSG00000125772	GPCPD1	GPCPD1	0.717262	6.31574	0.000489103	0.00678356
ENSG00000183918	SH2D1A	SH2D1A	0.716891	5.44165	0.00170523	0.0181361
ENSG00000139620	KANSL2	KANSL2	0.716633	5.80902	0.000470948	0.0066516
ENSG00000121274	TENT4B	TENT4B	0.716622	5.19986	0.00057928	0.00770455
ENSG00000120868	APAF1	APAF1	0.714104	5.58953	0.00147161	0.0161536
ENSG00000188739	RBM34	RBM34	0.714026	5.94913	0.000296413	0.00462103
ENSG00000113580	NR3C1	NR3C1	0.713094	7.00591	2.33186e-05	0.000529874
ENSG00000170542	SERPINB9	SERPINB9	0.711504	6.97886	0.00213881	0.0216625
ENSG00000184384	MAML2	MAML2	0.711468	5.79062	0.0001835	0.0031564
ENSG00000145241	CENPC	CENPC	0.710728	7.613	1.06875e-05	0.000268627
ENSG00000141664	ZCCHC2	ZCCHC2	0.710432	5.29299	0.00110094	0.0127197
ENSG00000233016	SNHG7	SNHG7	0.710404	6.86464	0.000256205	0.00410862
ENSG00000119048	UBE2B	UBE2B	0.709521	8.46006	1.12001e-05	0.000279232
ENSG00000124788	ATXN1	ATXN1	0.706864	5.73825	0.00226395	0.0226322
ENSG00000111596	AC092881.1	AC092881.1	0.705848	7.40664	8.62168e-06	0.0002203
ENSG00000115486	GGCX	GGCX	0.705177	5.21579	0.000272406	0.00432339
ENSG00000122557	HERPUD2	HERPUD2	0.702105	7.27875	2.40097e-05	0.000541582
ENSG00000009413	REV3L	REV3L	0.701612	5.77972	0.000528777	0.00723602
ENSG00000139372	TDG	TDG	0.701609	6.83865	0.00124719	0.014118
ENSG00000161011	SQSTM1	SQSTM1	0.701002	8.01449	0.0029449	0.0269857
ENSG00000133134	BEX2	BEX2	0.700911	6.19653	0.000966182	0.0115305
ENSG00000166233	ARIH1	ARIH1	0.699491	6.53567	0.000299091	0.00465102
ENSG00000102786	INTS6	INTS6	0.69916	6.40472	0.00154282	0.0167266
ENSG00000163607	GTPBP8	GTPBP8	0.697327	5.85764	0.000951171	0.0113943
ENSG00000141580	WDR45B	WDR45B	0.694862	5.87899	0.000469961	0.0066516
ENSG00000123395	ATG101	ATG101	0.694728	6.52896	0.000249435	0.00402099
ENSG00000198846	TOX	TOX	0.694441	6.03481	0.000575699	0.00767349
ENSG00000100664	EIF5	EIF5	0.693782	8.57191	9.57828e-05	0.0017928
ENSG00000135821	GLUL	GLUL	0.693201	7.49421	0.000123295	0.0022463
ENSG00000288632	NA	NA	0.69294	4.09803	0.00146875	0.016151
ENSG00000153283	CD96	CD96	0.691975	7.01498	0.00222227	0.0223607
ENSG00000171867	PRNP	PRNP	0.690651	6.95658	0.000105496	0.00194504
ENSG00000198355	PIM3	PIM3	0.690466	6.46606	0.000263143	0.00420893
ENSG00000143669	LYST	LYST	0.690438	7.17155	0.000273979	0.00433717
ENSG00000116604	MEF2D	MEF2D	0.690384	6.05768	0.00121678	0.0138246
ENSG00000124356	STAMBP	STAMBP	0.689614	5.84913	0.0025988	0.02485
ENSG00000117616	RSRP1	RSRP1	0.689366	8.61328	0.000222353	0.0037107
ENSG00000112739	PRPF4B	PRPF4B	0.688631	8.48541	0.000137005	0.00246689
ENSG00000168264	IRF2BP2	IRF2BP2	0.68836	6.85198	8.65678e-05	0.00164532
ENSG00000231721	LINC-PINT	LINC-PINT	0.688129	6.26654	0.00234923	0.0232041
ENSG00000172331	BPGM	BPGM	0.687502	6.67929	0.00482279	0.0396512
ENSG00000123908	AGO2	AGO2	0.682022	6.40649	0.00199773	0.0205376
ENSG00000118689	FOXO3	FOXO3	0.678996	5.98056	0.000114114	0.00209141
ENSG00000198833	UBE2J1	UBE2J1	0.676611	6.32317	0.000295727	0.00462103
ENSG00000102081	FMR1	FMR1	0.675868	6.25121	0.000194413	0.0033057
ENSG00000166579	NDEL1	NDEL1	0.67289	5.14236	0.000636803	0.0082839
ENSG00000148572	NRBF2	NRBF2	0.671493	6.69415	0.00119859	0.0136431
ENSG00000104419	NDRG1	NDRG1	0.671027	5.32205	0.00114486	0.0131531
ENSG00000101901	ALG13	ALG13	0.670758	5.86939	0.00479794	0.0395525
ENSG00000158321	AUTS2	AUTS2	0.669869	6.63543	0.000146893	0.00260682
ENSG00000171456	ASXL1	ASXL1	0.666455	5.98558	0.00508925	0.0410943
ENSG00000059758	CDK17	CDK17	0.665503	6.35633	0.00144249	0.0159814
ENSG00000168234	TTC39C	TTC39C	0.66479	6.14123	0.00246811	0.0239726
ENSG00000111011	RSRC2	RSRC2	0.664419	8.26824	1.59279e-05	0.00038165
ENSG00000007168	PAFAH1B1	PAFAH1B1	0.663335	7.76668	0.000164914	0.00288507
ENSG00000168273	SMIM4	SMIM4	0.661981	5.29822	0.0046618	0.0387807
ENSG00000183648	NDUFB1	NDUFB1	0.660603	8.5326	0.000738404	0.00927977
ENSG00000159884	CCDC107	CCDC107	0.659772	8.45203	0.000508232	0.00701725
ENSG00000124193	SRSF6	SRSF6	0.659639	5.73732	0.000480927	0.0067308
ENSG00000189241	TSPYL1	TSPYL1	0.659088	6.50226	0.00024442	0.00396182
ENSG00000163162	RNF149	RNF149	0.658375	6.48864	0.00061518	0.00807608
ENSG00000241370	RPP21	RPP21	0.658208	5.89457	0.00162118	0.0174227
ENSG00000101972	STAG2	STAG2	0.658023	7.3137	0.00075865	0.00943791
ENSG00000255717	SNHG1	SNHG1	0.656814	6.36327	0.0005875	0.00779703
ENSG00000124380	SNRNP27	SNRNP27	0.655134	5.865	0.00316866	0.028226
ENSG00000198900	TOP1	TOP1	0.653641	7.93845	0.000220055	0.00368233
ENSG00000183943	PRKX	PRKX	0.650449	6.93657	0.000187173	0.00319283
ENSG00000134758	RNF138	RNF138	0.649435	5.70082	0.00149122	0.0163107
ENSG00000173960	UBXN2A	UBXN2A	0.647018	5.93641	0.00307992	0.0278505
ENSG00000264343	NOTCH2NLA	NOTCH2NLA	0.646981	4.87835	0.00262505	0.0249846
ENSG00000160305	DIP2A	DIP2A	0.643593	8.27438	0.000237964	0.00387667
ENSG00000077721	UBE2A	UBE2A	0.643302	6.47814	0.00135598	0.0151271
ENSG00000131051	RBM39	RBM39	0.638783	10.3698	0.000305756	0.00473077
ENSG00000062716	VMP1	VMP1	0.638558	7.081	0.000370424	0.00555006
ENSG00000099875	MKNK2	MKNK2	0.637708	6.71453	0.00471679	0.0391455
ENSG00000154642	C21orf91	C21orf91	0.637447	5.52255	0.00504905	0.0409406
ENSG00000100401	RANGAP1	RANGAP1	0.636993	5.70107	0.000687531	0.00882045
ENSG00000133872	SARAF	SARAF	0.634357	9.89254	0.000340049	0.00515205
ENSG00000106415	GLCCI1	GLCCI1	0.633711	5.61999	0.00490685	0.0400217
ENSG00000165102	HGSNAT	HGSNAT	0.633296	5.03731	0.00180043	0.018887
ENSG00000058600	POLR3E	POLR3E	0.63208	5.47984	0.00445338	0.0373474
ENSG00000120063	GNA13	GNA13	0.631759	6.60784	0.00054944	0.00742492
ENSG00000105856	HBP1	HBP1	0.630976	6.98433	0.000391991	0.00578868
ENSG00000001629	ANKIB1	ANKIB1	0.630599	5.87635	0.00280735	0.0259771
ENSG00000168610	STAT3	STAT3	0.630016	7.52112	0.000549815	0.00742492
ENSG00000123562	MORF4L2	MORF4L2	0.628901	6.33567	0.00108328	0.0126278
ENSG00000257379	AC023509.1	AC023509.1	0.62809	5.25047	0.00414002	0.0353238
ENSG00000115875	SRSF7	SRSF7	0.627446	9.75799	0.00294924	0.0269857
ENSG00000150093	ITGB1	ITGB1	0.62739	8.96182	0.00182913	0.0190912
ENSG00000224578	HNRNPA1P48	HNRNPA1P48	0.626767	7.23795	0.000399472	0.00585703
ENSG00000144580	CNOT9	CNOT9	0.624518	5.83428	0.00209857	0.0213603
ENSG00000176463	SLCO3A1	SLCO3A1	0.622237	5.90153	0.00113456	0.013074
ENSG00000135077	HAVCR2	HAVCR2	0.620339	7.56017	0.000309889	0.0047827
ENSG00000028137	TNFRSF1B	TNFRSF1B	0.618617	8.42291	0.00515447	0.0414918
ENSG00000143851	PTPN7	PTPN7	0.617662	7.4511	9.33142e-05	0.00175728
ENSG00000125107	CNOT1	CNOT1	0.615855	6.43651	0.000672083	0.00864027
ENSG00000104324	CPQ	CPQ	0.615442	5.71423	0.00261968	0.0249722
ENSG00000286219	AC242843.1	AC242843.1	0.613667	4.99903	0.00431756	0.036622
ENSG00000151233	GXYLT1	GXYLT1	0.610981	5.9951	0.0025621	0.0245754
ENSG00000125633	CCDC93	CCDC93	0.610978	5.6352	0.00131011	0.014722
ENSG00000082701	GSK3B	GSK3B	0.610834	6.48316	0.000328847	0.00501247
ENSG00000135655	USP15	USP15	0.610252	7.50542	0.000237311	0.00387629
ENSG00000125844	RRBP1	RRBP1	0.609792	7.29831	0.000390389	0.00577888
ENSG00000273319	AC058791.1	AC058791.1	0.609633	7.03043	0.00248087	0.0240208
ENSG00000137955	RABGGTB	RABGGTB	0.609158	6.35474	0.000701927	0.00898642
ENSG00000165006	UBAP1	UBAP1	0.608611	5.40154	0.00312801	0.0281783
ENSG00000169288	MRPL1	MRPL1	0.607011	6.62821	0.00221253	0.0222991
ENSG00000102401	ARMCX3	ARMCX3	0.606611	6.4593	0.00132182	0.0148266
ENSG00000133703	KRAS	KRAS	0.606319	7.27509	0.0012285	0.013932
ENSG00000070770	CSNK2A2	CSNK2A2	0.606109	6.054	0.00323631	0.0286271
ENSG00000151466	SCLT1	SCLT1	0.605554	6.70892	0.00250056	0.024136
ENSG00000105939	ZC3HAV1	ZC3HAV1	0.603346	7.92278	0.000757784	0.00943791
ENSG00000083896	YTHDC1	YTHDC1	0.601752	8.18602	0.000141491	0.00254023
ENSG00000119669	IRF2BPL	IRF2BPL	0.601481	7.06387	0.000542069	0.0073966
ENSG00000163950	SLBP	SLBP	0.600405	7.0835	0.00398621	0.0343429
ENSG00000170881	RNF139	RNF139	0.599938	6.15591	0.0013377	0.0149773
ENSG00000160953	PWWP3A	PWWP3A	0.599837	5.55402	0.00483955	0.0397359
ENSG00000155903	RASA2	RASA2	0.599728	8.16931	0.000569839	0.00765819
ENSG00000123091	RNF11	RNF11	0.599579	5.70785	0.0022537	0.0225664
ENSG00000215301	DDX3X	DDX3X	0.596612	8.84769	0.000889965	0.0107882
ENSG00000123983	ACSL3	ACSL3	0.595828	5.99462	0.00479295	0.0395525
ENSG00000185418	TARSL2	TARSL2	0.595263	6.79436	0.00210827	0.0214236
ENSG00000167258	CDK12	CDK12	0.595215	6.74105	0.00187243	0.0194442
ENSG00000101082	SLA2	SLA2	0.594815	7.07519	0.000411608	0.00599215
ENSG00000182141	ZNF708	ZNF708	0.592897	6.13251	0.00268623	0.0253708
ENSG00000197872	FAM49A	FAM49A	0.592837	5.79799	0.00273427	0.0256672
ENSG00000186891	TNFRSF18	TNFRSF18	0.592805	8.46836	0.00305319	0.0276965
ENSG00000174574	AKIRIN1	AKIRIN1	0.592667	7.48896	0.000912991	0.0110051
ENSG00000139597	N4BP2L1	N4BP2L1	0.591624	6.01726	0.00350703	0.0306765
ENSG00000140941	MAP1LC3B	MAP1LC3B	0.591348	8.91297	0.000474034	0.00667986
ENSG00000101596	SMCHD1	SMCHD1	0.590541	8.37371	0.000110975	0.00203995
ENSG00000176624	MEX3C	MEX3C	0.589861	7.00683	0.000730892	0.00925602
ENSG00000097033	SH3GLB1	SH3GLB1	0.589356	7.99283	0.000430617	0.00619565
ENSG00000131013	PPIL4	PPIL4	0.588726	6.36167	0.0043789	0.0369894
ENSG00000145495	MARCH6	MARCH6	0.588673	6.69662	0.00116698	0.0133326
ENSG00000248167	TRIM39-RPP21	TRIM39-RPP21	0.587999	5.60578	0.00549247	0.0433624
ENSG00000150995	ITPR1	ITPR1	0.582799	5.3755	0.00230951	0.0229757
ENSG00000165879	FRAT1	FRAT1	0.582507	5.80535	0.00527341	0.0420668
ENSG00000168374	ARF4	ARF4	0.581465	6.96522	0.0053421	0.0424473
ENSG00000143933	CALM2	CALM2	0.580548	8.42757	0.00180463	0.018887
ENSG00000114374	USP9Y	USP9Y	0.580536	5.83748	0.00256034	0.0245754
ENSG00000065243	PKN2	PKN2	0.577774	6.5172	0.00194081	0.0200528
ENSG00000122482	ZNF644	ZNF644	0.577342	5.8233	0.00638664	0.0488558
ENSG00000135334	AKIRIN2	AKIRIN2	0.57452	7.19353	0.000611763	0.00804965
ENSG00000173113	TRMT112	TRMT112	0.573402	8.91272	0.000545852	0.00740387
ENSG00000092439	TRPM7	TRPM7	0.570357	5.88118	0.00432511	0.0366355
ENSG00000163399	ATP1A1	ATP1A1	0.569771	6.09227	0.00275368	0.02581
ENSG00000104472	CHRAC1	CHRAC1	0.569166	6.91122	0.00146855	0.016151
ENSG00000174021	GNG5	GNG5	0.569065	8.55931	0.000169891	0.00295534
ENSG00000169020	ATP5ME	ATP5ME	0.566289	9.20367	0.000521663	0.00717054
ENSG00000101654	RNMT	RNMT	0.565413	7.34554	0.000345692	0.00521758
ENSG00000255641	AC068775.1	AC068775.1	0.565316	7.75743	0.000757069	0.00943791
ENSG00000135049	AGTPBP1	AGTPBP1	0.561095	6.76829	0.00246478	0.0239726
ENSG00000124214	STAU1	STAU1	0.560454	6.84764	0.00255884	0.0245754
ENSG00000152518	ZFP36L2	ZFP36L2	0.557985	11.0834	0.00223019	0.0224037
ENSG00000136758	YME1L1	YME1L1	0.556912	8.14054	0.00361923	0.0315683
ENSG00000115419	GLS	GLS	0.556742	7.67986	0.00223537	0.0224192
ENSG00000105329	TGFB1	TGFB1	0.555592	9.00284	0.00153237	0.0166426
ENSG00000023909	GCLM	GCLM	0.554978	6.85012	0.00405678	0.0347934
ENSG00000005022	SLC25A5	SLC25A5	0.553516	9.47809	0.000620075	0.00810706
ENSG00000125995	ROMO1	ROMO1	0.553302	7.96201	0.00276579	0.0258193
ENSG00000133104	SPART	SPART	0.550105	6.1539	0.00513783	0.041412
ENSG00000100429	HDAC10	HDAC10	0.549439	5.39897	0.00458826	0.0383372
ENSG00000163320	CGGBP1	CGGBP1	0.548467	7.4299	0.000482673	0.00673992
ENSG00000162642	C1orf52	C1orf52	0.548306	6.51127	0.00146357	0.016151
ENSG00000103342	GSPT1	GSPT1	0.545462	6.9865	0.0015528	0.0168052
ENSG00000135018	UBQLN1	UBQLN1	0.543975	6.07015	0.00465496	0.0387807
ENSG00000158985	CDC42SE2	CDC42SE2	0.543582	7.22287	0.00196587	0.0202778
ENSG00000181315	ZNF322	ZNF322	0.541749	5.33102	0.00534067	0.0424473
ENSG00000124228	DDX27	DDX27	0.54157	7.20159	0.00545158	0.0430948
ENSG00000185883	ATP6V0C	ATP6V0C	0.541563	7.3442	0.000914736	0.0110051
ENSG00000159459	UBR1	UBR1	0.540771	5.78694	0.00414157	0.0353238
ENSG00000005483	KMT2E	KMT2E	0.540495	8.97944	0.000378664	0.00564604
ENSG00000169057	MECP2	MECP2	0.539518	6.93789	0.00147713	0.0161854
ENSG00000146457	WTAP	WTAP	0.538102	7.37439	0.00264276	0.0250411
ENSG00000142599	RERE	RERE	0.537288	5.71535	0.00606595	0.0468249
ENSG00000114416	FXR1	FXR1	0.53725	6.81093	0.00241069	0.023601
ENSG00000152558	TMEM123	TMEM123	0.535884	6.92588	0.00191229	0.0198248
ENSG00000116489	CAPZA1	CAPZA1	0.535816	8.01397	0.000592995	0.00785305
ENSG00000135974	C2orf49	C2orf49	0.531478	5.88135	0.00360447	0.0314842
ENSG00000110958	PTGES3	PTGES3	0.529843	9.00804	0.00315331	0.028226
ENSG00000183336	BOLA2	BOLA2	0.528505	7.35476	0.00206141	0.0211217
ENSG00000126777	KTN1	KTN1	0.526817	7.9115	0.000640527	0.00830393
ENSG00000119729	RHOQ	RHOQ	0.526798	6.42982	0.00326271	0.0287436
ENSG00000115053	NCL	NCL	0.526343	10.215	0.00174022	0.0183813
ENSG00000139116	KIF21A	KIF21A	0.526265	5.93473	0.00408302	0.0349697
ENSG00000113013	HSPA9	HSPA9	0.5259	7.57949	0.00236203	0.0232715
ENSG00000166226	CCT2	CCT2	0.525227	7.65409	0.00344014	0.0301772
ENSG00000100239	PPP6R2	PPP6R2	0.523891	6.19265	0.00429973	0.036521
ENSG00000124784	RIOK1	RIOK1	0.52324	6.05247	0.00442522	0.0372275
ENSG00000136897	MRPL50	MRPL50	0.522855	5.9265	0.0056767	0.0447022
ENSG00000067082	KLF6	KLF6	0.516058	8.19164	0.0047527	0.0393375
ENSG00000110321	EIF4G2	EIF4G2	0.515648	8.65632	0.00102146	0.0120458
ENSG00000115138	POMC	POMC	0.515213	6.72049	0.00500886	0.0407457
ENSG00000124422	USP22	USP22	0.51411	6.04608	0.00631404	0.0484207
ENSG00000260032	NORAD	NORAD	0.514017	7.32146	0.00146169	0.016151
ENSG00000137770	CTDSPL2	CTDSPL2	0.513299	6.31156	0.00487307	0.0398517
ENSG00000109046	WSB1	WSB1	0.510913	8.11537	0.00398753	0.0343429
[truncated: 252 more rows]
