# Supplementary material for: Single-cell characterization of human GBM reveals regional differences in tumor-infiltrating leukocyte activation
Source: eLife. 2023 Dec 21;12:RP92678. doi: 10.7554/eLife.92678 (PMC10735226; doi:10.7554/eLife.92678)
Supplement: Supplementary file 7. [file elife-92678-supp7.xlsx]

## Sheet: DESeq2_MG_periphery vs center
Spalte1	baseMean	log2FoldChange	lfcSE	stat	pvalue	padj
ST14	14.5154	-3.00473	0.784705	3.82912	0.000128605	0.0443374
CCL20	151.592	-2.60683	0.538843	4.83783	1.31267e-06	0.00682849
PLXNC1	18.4032	-2.28548	0.685414	3.33444	0.000854705	0.137955
FCGBP	103.443	-2.05091	0.43718	4.69124	2.71561e-06	0.0070633
IFI6	133.363	-1.82902	0.526412	3.4745	0.000511812	0.106498
PLTP	64.7081	-1.74604	0.518033	3.37052	0.000750255	0.130094
HAMP	171.76	-1.47766	0.427776	3.45429	0.000551754	0.110393
EGR3	143.159	1.29922	0.405721	-3.20225	0.00136361	0.163297
P2RY13	214.104	1.3111	0.41053	-3.19368	0.0014047	0.163297
TRA2B	277.164	1.33615	0.42539	-3.14099	0.00168376	0.175178
PMAIP1	166.152	1.34599	0.42807	-3.14432	0.00166473	0.175178
TLE4	70.417	1.38892	0.436772	-3.17997	0.00147292	0.166569
Z93241.1	94.0572	1.39853	0.436905	-3.20099	0.00136957	0.163297
AL627171.1	77.4342	1.42048	0.445003	-3.19206	0.0014126	0.163297
AC025164.1	70.6971	1.45212	0.439772	-3.30197	0.000960075	0.138413
AC007952.4	91.7197	1.47402	0.444974	-3.3126	0.000924318	0.138413
MIR29B2CHG	67.7504	1.48039	0.475372	-3.11417	0.00184464	0.188154
MIR222HG	54.3011	1.48476	0.460457	-3.22453	0.00126181	0.160096
SPRY1	83.6901	1.5803	0.435135	-3.63176	0.000281496	0.0716541
KLHL15	25.9848	1.58161	0.511596	-3.09152	0.00199134	0.19921
SPRY2	60.7647	1.6212	0.499893	-3.24308	0.00118243	0.156758
HEXIM1	96.0854	1.63188	0.497703	-3.27882	0.00104243	0.142703
AC114760.2	35.6806	1.66515	0.505368	-3.29492	0.000984486	0.138413
HIST1H2BF	23.892	1.69917	0.540527	-3.14354	0.00166919	0.175178
DHRS9	25.0653	1.71498	0.504552	-3.39902	0.000676287	0.125644
AL355075.4	80.5522	1.77547	0.524421	-3.38559	0.000710249	0.127404
MYLIP	58.3708	1.77676	0.517591	-3.43274	0.000597509	0.11512
ID1	60.1433	1.78708	0.47385	-3.77141	0.000162329	0.0496728
AC004687.1	116.337	1.80648	0.42212	-4.27954	1.87276e-05	0.0162368
AC007613.1	26.8503	1.86644	0.504548	-3.69923	0.000216252	0.0614873
AL135791.1	27.6517	1.87979	0.536192	-3.50582	0.000455206	0.0986659
AC096733.2	24.8494	1.88475	0.566353	-3.32786	0.000875146	0.137955
AC023509.3	18.3938	1.94266	0.587256	-3.30803	0.000939556	0.138413
AC020911.2	40.7419	1.95519	0.495851	-3.9431	8.04349e-05	0.0321863
HIST1H2BG	44.8995	1.97328	0.5886	-3.3525	0.000800863	0.13439
SREBF2-AS1	47.2064	2.02323	0.506901	-3.99138	6.56906e-05	0.0321863
AP002364.1	13.6827	2.03074	0.627234	-3.23761	0.00120537	0.156758
POLG2	20.7391	2.03534	0.551637	-3.68963	0.000224579	0.0614873
RF00003_ENSG00000274210	16.8968	2.04156	0.582091	-3.50729	0.0004527	0.0986659
AC008074.2	16.8268	2.05881	0.65493	-3.14357	0.00166902	0.175178
AL451085.1	51.0443	2.06724	0.476924	-4.33453	1.46071e-05	0.0151973
HIST2H2BD	25.966	2.0721	0.571657	-3.62473	0.000289261	0.0716541
BX284668.6	40.5322	2.08729	0.492074	-4.24181	2.2172e-05	0.0164769
ACY3	31.4524	2.09339	0.548775	-3.81466	0.00013637	0.0443374
FP700111.1	40.193	2.1112	0.508702	-4.15017	3.32226e-05	0.021603
AC006994.2	38.0504	2.1762	0.498397	-4.36641	1.26308e-05	0.0151973
FZD1	22.8143	2.21116	0.613368	-3.60495	0.00031221	0.0738234
AL031777.3	44.8098	2.29977	0.520007	-4.42257	9.75318e-06	0.0151973
DDN-AS1	21.6271	2.35779	0.594475	-3.96617	7.30374e-05	0.0321863
RF00003_ENSG00000273727	20.8997	2.40286	0.60773	-3.95383	7.69087e-05	0.0321863
SRGAP2-AS1	19.1582	2.40331	0.593772	-4.04753	5.17602e-05	0.0299174
TENT5C	12.0991	2.84392	0.732138	-3.8844	0.000102581	0.0381163

## Sheet: DESeq2_CD8_periphery vs center
Spalte1	baseMean	log2FoldChange	lfcSE	stat	pvalue	padj
IFI6	101.085	-1.57784	0.270482	5.83344	5.42961e-09	3.15623e-05
MX1	57.5417	-1.202	0.291258	4.12694	3.67626e-05	0.103424
EPSTI1	48.3442	-1.19953	0.299609	4.00365	6.23734e-05	0.103424
TNFRSF18	78.9431	-1.21959	0.307019	3.97235	7.11677e-05	0.103424
TYMP	58.5379	-1.08698	0.277397	3.9185	8.91017e-05	0.10359
ISG15	154.68	-0.902719	0.236424	3.81822	0.00013442	0.126788
CTLA4	39.4483	-1.53449	0.405234	3.78667	0.000152678	0.126788
MT-ATP8	84.1291	0.909509	0.243542	-3.73451	0.000188081	0.136664

## Sheet: DESeq2_CD8_periphery vs PBMC
Spalte1	baseMean	log2FoldChange	lfcSE	stat	pvalue	padj
ASCL2	20.5023	-3.37657	0.55187	6.11841	9.45118e-10	4.00849e-08
CX3CR1	24.2458	-3.33469	0.571074	5.83933	5.24117e-09	1.93828e-07
SPTSSB	24.5647	-3.28189	0.918206	3.57424	0.000351243	0.00455191
CTBP2	12.6894	-2.79084	0.609068	4.58216	4.60205e-06	0.000102616
PRSS23	8.23115	-2.45409	0.721456	3.40158	0.000669986	0.00779936
FGR	29.3433	-2.31075	0.397635	5.81124	6.2012e-09	2.26568e-07
PLEKHG3	21.7382	-2.27139	0.450274	5.04445	4.54823e-07	1.25959e-05
KLRF1	157.381	-2.24247	0.287105	7.81064	5.68978e-15	5.15053e-13
AL365475.1	14.8259	-2.22374	0.541587	4.10596	4.02635e-05	0.000691779
PRSS30P	19.1215	-2.14171	0.464882	4.60701	4.08507e-06	9.24476e-05
ITGAM	21.2673	-2.13741	0.446848	4.7833	1.72443e-06	4.26885e-05
A2M-AS1	77.7304	-2.11116	0.291603	7.23983	4.49236e-13	3.28267e-11
CXXC5	41.5484	-2.08792	0.381235	5.47672	4.33284e-08	1.3978e-06
S1PR5	35.4734	-2.07961	0.395391	5.25963	1.44348e-07	4.39935e-06
TRDC	157.087	-1.95338	0.303865	6.42846	1.28907e-10	6.30499e-09
AC138150.1	13.6409	-1.89603	0.496892	3.81578	0.000135752	0.00201305
SELL	107.556	-1.89478	0.275648	6.87393	6.24552e-12	3.60753e-10
NEIL1	12.0768	-1.88547	0.583159	3.23319	0.00122415	0.0128451
C1orf162	65.6425	-1.86839	0.309985	6.02736	1.66656e-09	6.92305e-08
KLRG1	243.06	-1.86323	0.242208	7.69268	1.4409e-14	1.21375e-12
PLEK	90.2901	-1.85146	0.286308	6.46666	1.00191e-10	4.98081e-09
ADGRG1	31.2486	-1.77518	0.4181	4.24583	2.1779e-05	0.000407684
FGFBP2	225.462	-1.73839	0.298289	5.82785	5.61451e-09	2.06376e-07
DGKQ	14.6004	-1.73574	0.497234	3.49079	0.000481586	0.00594872
PLAC8	217.418	-1.73405	0.250005	6.93603	4.03269e-12	2.49574e-10
CMC1	545.729	-1.69889	0.242242	7.01318	2.32958e-12	1.53575e-10
TMIGD2	37.4035	-1.67295	0.395371	4.23135	2.32289e-05	0.000430836
ZNF12	14.4472	-1.66655	0.480576	3.46781	0.000524719	0.00641617
FCER1G	52.3389	-1.66182	0.316363	5.2529	1.49727e-07	4.51787e-06
TTC38	41.6608	-1.59745	0.341131	4.6828	2.82988e-06	6.65242e-05
TMEM63A	15.4172	-1.57498	0.476503	3.30529	0.000948791	0.0103683
AC004552.1	5.61543	-1.55236	0.748344	2.07439	0.0380427	0.173799
SVIL	18.9672	-1.54429	0.431265	3.58084	0.000342493	0.00447325
TOR2A	15.7151	-1.54293	0.451415	3.41799	0.000630856	0.00747294
OSBPL5	15.5792	-1.52891	0.450355	3.3949	0.000686531	0.0079462
TSPAN32	40.3209	-1.51954	0.32095	4.73449	2.19608e-06	5.30647e-05
SLC35F6	8.11714	-1.51752	0.60979	2.4886	0.0128249	0.0801538
FCGR3A	107.636	-1.5174	0.333625	4.54822	5.41023e-06	0.000118664
TPST2	94.4261	-1.50482	0.253503	5.93612	2.91843e-09	1.15535e-07
REPIN1	9.87636	-1.485	0.55955	2.65392	0.00795636	0.0560457
MYO1F	90.7227	-1.47572	0.259567	5.68533	1.30562e-08	4.52492e-07
COL6A2	19.1137	-1.45194	0.445123	3.26187	0.00110679	0.0117561
AC097448.1	14.6083	-1.44248	0.49584	2.90917	0.00362391	0.0304351
PTGDR	92.6711	-1.44181	0.316513	4.55529	5.23122e-06	0.00011581
CST3	15.5368	-1.42893	0.453105	3.15364	0.00161246	0.0161913
CENPT	14.0855	-1.42465	0.478839	2.97523	0.00292772	0.0257342
RCBTB2	27.1905	-1.40623	0.365896	3.84325	0.000121415	0.00182273
NCR3	92.3692	-1.3904	0.325665	4.26941	1.95988e-05	0.000374974
TMEM203	45.8086	-1.38875	0.325279	4.26941	1.95988e-05	0.000374974
SLC25A45	28.8612	-1.38108	0.339235	4.07115	4.67813e-05	0.000790331
ING4	30.8809	-1.38075	0.335763	4.11227	3.91792e-05	0.000675063
CEPT1	10.7248	-1.36497	0.517258	2.63886	0.00831844	0.0580883
MHENCR	26.0952	-1.36391	0.355127	3.84064	0.000122716	0.00183771
CEP78	44.4777	-1.36109	0.29949	4.54468	5.50176e-06	0.000120029
ATF6B	28.4706	-1.35927	0.362872	3.74587	0.000179771	0.00255942
SCPEP1	16.0559	-1.35022	0.475616	2.83888	0.00452716	0.0363672
RPE	19.5567	-1.35005	0.395608	3.4126	0.000643471	0.0075927
GIMAP6	37.6658	-1.34925	0.331708	4.06759	4.75027e-05	0.000800289
LINC00987	11.7989	-1.34755	0.496964	2.71156	0.00669673	0.0489936
INTS1	16.8555	-1.34703	0.42573	3.16406	0.00155587	0.0157011
LST1	26.6531	-1.34391	0.404079	3.32586	0.000881467	0.00972018
ARMC6	8.79983	-1.32635	0.571546	2.32064	0.0203062	0.113092
TIMM22	23.8351	-1.30621	0.364431	3.58425	0.000338052	0.00442826
SYTL1	101.915	-1.28729	0.25171	5.11417	3.15128e-07	8.973e-06
NAIP	12.8393	-1.28569	0.500658	2.56801	0.0102284	0.0678725
LYN	17.486	-1.26935	0.44429	2.85703	0.00427623	0.0346729
MIF4GD	28.9233	-1.25914	0.335371	3.75447	0.000173706	0.00248473
KLRB1	825.065	-1.25758	0.268431	4.68493	2.8006e-06	6.63503e-05
AC034102.1	16.2715	-1.25561	0.45636	2.75136	0.0059348	0.0446583
LINC00861	41.6491	-1.25239	0.292696	4.2788	1.87905e-05	0.000362943
RAB37	29.9283	-1.24138	0.407038	3.04979	0.00228999	0.0213874
S1PR1	17.4828	-1.237	0.413029	2.99494	0.00274503	0.0244713
TRPV2	32.4322	-1.23625	0.333966	3.70172	0.000214139	0.00298564
NCAM1	19.6564	-1.23348	0.455087	2.71043	0.0067197	0.0490659
CD84	59.5096	-1.23179	0.299129	4.11791	3.82321e-05	0.000662507
FCRL3	11.7271	-1.22951	0.495513	2.4813	0.0130906	0.0813531
TXK	50.0799	-1.2268	0.329471	3.72353	0.000196453	0.0027709
USP28	40.381	-1.22407	0.307472	3.98107	6.86068e-05	0.00110665
AL645924.2	25.4038	-1.22131	0.406178	3.00683	0.00263991	0.0237553
VPS51	78.2707	-1.21421	0.242633	5.00432	5.60588e-07	1.51784e-05
RPS6KA1	49.145	-1.2084	0.27636	4.37258	1.22788e-05	0.000249066
NSG1	14.9378	-1.20708	0.513159	2.35226	0.0186599	0.106635
NSUN5P2	17.2501	-1.20123	0.417656	2.87612	0.00402602	0.0330417
PRF1	293.034	-1.19584	0.189038	6.32593	2.51709e-10	1.19267e-08
ITGB7	59.7029	-1.19574	0.310016	3.85703	0.000114773	0.00173159
SPON2	109.127	-1.18245	0.254658	4.64327	3.4293e-06	7.8783e-05
ARL14EP	48.3757	-1.1768	0.290828	4.04638	5.20163e-05	0.000869087
HDHD5	13.7801	-1.17551	0.462227	2.54315	0.0109858	0.0717985
CD244	19.9615	-1.1745	0.433669	2.7083	0.00676297	0.0492998
CYTH4	41.4298	-1.17366	0.330685	3.54918	0.000386428	0.00496543
RHBDF2	19.0334	-1.16263	0.396533	2.93198	0.00336811	0.0287712
TRGC1	104.445	-1.16221	0.270723	4.29297	1.76296e-05	0.000342703
PILRB	22.2692	-1.15507	0.389437	2.966	0.00301704	0.0264427
SCRN2	19.7578	-1.15416	0.40393	2.85732	0.0042723	0.0346729
GK5	26.8233	-1.15123	0.344534	3.34141	0.000833549	0.00931027
EEF1G	713.031	-1.14654	0.193942	5.91175	3.38502e-09	1.29938e-07
GRK6	97.6462	-1.14243	0.242473	4.7116	2.45779e-06	5.91527e-05
CDC25B	41.6722	-1.13827	0.325393	3.49814	0.000468506	0.00581082
YIPF4	53.2546	-1.1363	0.274372	4.14148	3.45068e-05	0.000612304
SASH3	29.5531	-1.1323	0.342308	3.30784	0.00094019	0.0102929
NELFB	29.639	-1.12858	0.333212	3.38696	0.000706704	0.00812671
SCAMP1-AS1	9.79812	-1.12753	0.531546	2.12122	0.0339032	0.161418
AP002990.1	687.762	-1.11789	0.192947	5.79378	6.88196e-09	2.46067e-07
ICAM2	55.9041	-1.11542	0.280527	3.97615	7.00388e-05	0.00112377
RIPOR2	121.942	-1.11265	0.220192	5.05311	4.34677e-07	1.21489e-05
CD160	38.8355	-1.11243	0.342265	3.25021	0.00115322	0.0121218
GAB3	32.9249	-1.1059	0.326585	3.38626	0.000708516	0.00812671
C2orf68	14.2219	-1.10434	0.444319	2.48547	0.012938	0.0807292
ELMOD3	10.6092	-1.10331	0.496732	2.22113	0.0263422	0.135855
PLEKHA1	61.9104	-1.09641	0.259214	4.22974	2.33963e-05	0.000432618
MRPS18A	15.7267	-1.09629	0.434844	2.52112	0.0116983	0.0749211
EIF3D	159.524	-1.09149	0.210999	5.17294	2.30439e-07	6.75175e-06
POGLUT1	15.6039	-1.08363	0.424882	2.55043	0.010759	0.0706972
ZNF136	14.3828	-1.08229	0.442871	2.4438	0.0145334	0.0883217
ESYT1	35.8389	-1.08054	0.312346	3.45945	0.000541278	0.00657886
PDGFD	15.8165	-1.07811	0.43811	2.46083	0.0138616	0.0850916
KLRD1	654.787	-1.07516	0.233662	4.60135	4.19763e-06	9.46417e-05
EXOG	15.9839	-1.06544	0.415611	2.56356	0.0103606	0.0685993
HTD2	9.54207	-1.06411	0.523806	2.0315	0.0422047	0.186432
CTSH	17.6664	-1.05389	0.454876	2.31688	0.0205101	0.11377
PRR5	38.4556	-1.05228	0.309345	3.40163	0.000669852	0.00779936
RBM15B	20.5879	-1.05092	0.373508	2.81365	0.00489822	0.0386316
RPL21	4714.12	-1.04943	0.197519	5.31303	1.07819e-07	3.3194e-06
YPEL1	53.9997	-1.04857	0.26982	3.88616	0.00010184	0.00157166
SIPA1	98.2051	-1.04731	0.234763	4.46115	8.15212e-06	0.000172876
PHACTR2	75.7176	-1.04718	0.283242	3.69711	0.000218065	0.0030334
SORL1	53.3095	-1.04662	0.290191	3.60665	0.000310171	0.00409884
SH3BP5	100.687	-1.04661	0.237364	4.4093	1.03705e-05	0.000213935
FLI1	38.6513	-1.04332	0.314084	3.32179	0.000894409	0.00984499
PTPN12	35.6343	-1.03887	0.312068	3.329	0.000871582	0.00964626
KLHDC3	24.5647	-1.03763	0.359747	2.88432	0.00392254	0.0324118
TNFRSF1A	18.8931	-1.0376	0.390634	2.6562	0.00790272	0.0557325
ICAM3	317.048	-1.03421	0.197746	5.23002	1.69488e-07	5.08882e-06
SEC24C	14.4438	-1.03404	0.439655	2.35195	0.0186754	0.106635
LINC02084	34.0732	-1.03306	0.315853	3.27069	0.00107285	0.0115165
VCL	21.9915	-1.033	0.3737	2.76425	0.0057054	0.0434714
CTU1	18.4122	-1.0301	0.481409	2.13975	0.0323749	0.156707
CD300A	49.9176	-1.02935	0.27079	3.8013	0.000143941	0.0021087
GPAA1	35.6893	-1.02825	0.325935	3.15478	0.0016062	0.0161553
C1orf21	70.5201	-1.02436	0.312498	3.27799	0.0010455	0.011303
AL022311.1	17.9867	-1.02256	0.402397	2.54117	0.0110484	0.072052
MATK	248.589	-1.0191	0.220998	4.61137	4.0003e-06	9.08683e-05
CIAPIN1	14.224	-1.01756	0.456086	2.23107	0.0256767	0.13333
APEH	23.5706	-1.01642	0.357569	2.84258	0.00447498	0.0359957
G6PD	32.7538	-1.01495	0.356788	2.84468	0.00444557	0.0359019
ASL	15.5012	-1.01393	0.42375	2.39275	0.0167224	0.0977085
RPL36A-HNRNPH2	17.1681	-1.0096	0.435865	2.31632	0.0205405	0.11377
ERGIC1	25.757	-1.0063	0.339858	2.96094	0.00306706	0.0268423
VRK3	23.1708	-1.00559	0.359903	2.79405	0.00520526	0.0404742
BIN2	181.777	-1.00286	0.22671	4.42355	9.70915e-06	0.000203055
MOGS	17.7328	-0.997189	0.402124	2.47981	0.0131454	0.0815204
TGFBR3	32.5964	-0.993404	0.319654	3.10775	0.00188521	0.0183528
MAST3	14.3589	-0.989047	0.434911	2.27413	0.0229579	0.122786
S1PR4	98.3403	-0.985854	0.232622	4.23801	2.25505e-05	0.000419537
LDLRAP1	32.6682	-0.985395	0.314965	3.12858	0.0017565	0.0173345
RASGRP2	84.3215	-0.984476	0.23709	4.15234	3.29099e-05	0.000590527
EIF2B2	16.6647	-0.98412	0.418479	2.35166	0.0186897	0.106635
NCALD	19.0763	-0.980714	0.389751	2.51626	0.0118609	0.0755633
GIMAP1	71.0171	-0.980398	0.251454	3.89892	9.6623e-05	0.00150647
ABHD17A	305.895	-0.975579	0.20247	4.81839	1.44722e-06	3.6121e-05
AC026362.1	73.0337	-0.974064	0.241893	4.02684	5.6531e-05	0.000929162
EIF3L	162.698	-0.973388	0.199365	4.88244	1.04781e-06	2.70747e-05
TBC1D14	17.9561	-0.972893	0.415295	2.34265	0.0191471	0.108733
FUT11	17.0378	-0.971912	0.4187	2.32126	0.0202727	0.113092
TRIOBP	15.5269	-0.970986	0.423155	2.29463	0.0217541	0.118013
SLC25A20	14.4719	-0.969798	0.432748	2.24102	0.0250245	0.130874
FCGRT	21.2656	-0.968258	0.43761	2.2126	0.026925	0.13769
DCK	45.554	-0.967557	0.312948	3.09175	0.00198981	0.0192169
FCMR	64.1298	-0.965493	0.262852	3.67315	0.000239582	0.00328748
LYAR	300.456	-0.962796	0.184245	5.22562	1.73575e-07	5.18586e-06
GSDMD	68.7895	-0.958006	0.27526	3.48036	0.000500733	0.00614766
MFNG	68.2118	-0.956342	0.24619	3.88457	0.000102512	0.00157701
TMEM256-PLSCR3	15.0544	-0.955422	0.418702	2.28187	0.0224971	0.120855
ZNF32	45.1384	-0.955085	0.286625	3.33217	0.000861709	0.00957191
SLC27A3	16.1702	-0.953797	0.40956	2.32883	0.019868	0.111942
MRPS11	34.5194	-0.953424	0.318797	2.9907	0.00278341	0.0246085
SLC25A42	15.3083	-0.952076	0.419197	2.27119	0.0231357	0.12325
NSUN5P1	23.0432	-0.949823	0.372945	2.54682	0.0108709	0.0712884
SMARCD2	17.6432	-0.948942	0.412334	2.30139	0.0213694	0.116447
TTC16	20.26	-0.947813	0.372595	2.54381	0.0109649	0.0717392
CD2BP2	45.2259	-0.945186	0.280294	3.37212	0.000745912	0.00844022
ST6GAL1	25.2985	-0.94026	0.349289	2.69192	0.00710415	0.0513548
EOMES	33.7795	-0.939889	0.370609	2.53607	0.0112105	0.0727962
LRCH3	17.297	-0.939522	0.403521	2.32831	0.0198958	0.111942
KIAA2013	26.9592	-0.9381	0.340135	2.75802	0.00581524	0.044142
KLRC3	39.1759	-0.936841	0.343774	2.72517	0.00642685	0.0473619
AKT2	28.3062	-0.936024	0.330896	2.82876	0.00467292	0.0371445
TSN	26.9497	-0.934804	0.334212	2.79704	0.00515731	0.0402393
PIK3R5	26.1733	-0.934035	0.352195	2.65204	0.00800068	0.0562823
DGKZ	113.409	-0.932221	0.216297	4.30992	1.63315e-05	0.000320552
UBL4A	25.1035	-0.92996	0.346526	2.68366	0.00728202	0.0523288
MYO1G	104.496	-0.929213	0.243105	3.82227	0.000132231	0.00197047
DDOST	134.118	-0.928595	0.211921	4.3818	1.177e-05	0.000239548
KHDC4	17.327	-0.928111	0.418021	2.22025	0.0264017	0.135874
EHMT2	20.5053	-0.92722	0.383074	2.42047	0.0155005	0.0927124
EDEM2	20.6889	-0.926396	0.375505	2.46706	0.0136226	0.0839644
MTMR4	12.2656	-0.925442	0.461708	2.00439	0.0450285	0.195629
CHPF2	15.5495	-0.924404	0.442254	2.09021	0.0365987	0.169962
MRPL20-AS1	16.1391	-0.920831	0.426116	2.16099	0.0306964	0.151238
SLAMF6	38.3474	-0.919971	0.331683	2.77364	0.00554327	0.0426649
FLNA	191.065	-0.918107	0.206281	4.45076	8.55673e-06	0.000180824
SLC44A2	27.2939	-0.918081	0.333455	2.75324	0.00590091	0.0444584
SIGLEC17P	21.1134	-0.917479	0.422982	2.16907	0.0300771	0.14948
RSAD1	19.9669	-0.916365	0.392465	2.3349	0.0195488	0.1106
BABAM2	26.0208	-0.915938	0.341896	2.679	0.00738429	0.0527512
AL928654.3	86.4285	-0.914785	0.291953	3.13333	0.00172837	0.0171284
MFSD8	12.7673	-0.914242	0.458393	1.99445	0.0461027	0.198939
TRIM11	16.9133	-0.909372	0.416657	2.18255	0.0290692	0.145696
RPL17	2825.89	-0.908982	0.207264	4.38562	1.15655e-05	0.000236177
TLNRD1	18.0463	-0.908273	0.406748	2.23301	0.025548	0.133047
LPCAT1	34.0132	-0.908258	0.31767	2.85912	0.00424817	0.0345377
PNKP	31.6716	-0.907124	0.320029	2.8345	0.00458967	0.0367234
FLAD1	17.3895	-0.904917	0.394638	2.29303	0.0218462	0.118407
STAT6	19.9794	-0.904884	0.375079	2.41252	0.0158427	0.0940178
ARMC8	20.4467	-0.903812	0.379892	2.37913	0.0173535	0.100813
DCAF10	15.317	-0.900401	0.439345	2.04941	0.0404216	0.180395
TTC5	14.2217	-0.899138	0.443511	2.02732	0.04263	0.188037
NAE1	42.5128	-0.898675	0.280081	3.20862	0.00133372	0.0137803
RRAS2	40.4439	-0.897741	0.304504	2.94821	0.0031962	0.0276139
PPP1CA	125.45	-0.894462	0.220291	4.06037	4.89957e-05	0.000823155
FBL	97.7081	-0.89329	0.229625	3.89021	0.000100158	0.00154964
HPS1	26.8545	-0.893148	0.343183	2.60254	0.00925356	0.0630594
ITGB2	312.563	-0.89226	0.216116	4.12862	3.64942e-05	0.000638598
EFHD2	242.039	-0.89079	0.19848	4.48806	7.18735e-06	0.000154033
ABCA2	19.6499	-0.890182	0.385837	2.30715	0.0210466	0.115309
TADA3	61.0407	-0.889769	0.293184	3.03485	0.00240658	0.0221139
ATP6V0A2	18.8643	-0.888781	0.409944	2.16806	0.0301545	0.14948
VIRMA	21.2979	-0.888128	0.363601	2.44259	0.0145823	0.0885304
AC116533.1	68.1104	-0.887286	0.272299	3.2585	0.00112004	0.0118552
RAB29	65.8632	-0.886138	0.248382	3.56764	0.000360211	0.00465816
PTPN6	51.3572	-0.884842	0.260856	3.39207	0.00069367	0.00799831
SNHG32	59.1624	-0.883883	0.295005	2.99616	0.00273402	0.0244209
RFFL	15.6099	-0.883768	0.420218	2.10312	0.0354554	0.166437
WDR13	20.4571	-0.88239	0.375173	2.35196	0.0186749	0.106635
AC107075.1	16.0693	-0.877247	0.420584	2.08578	0.0369982	0.170902
POP7	25.3492	-0.876413	0.335841	2.6096	0.00906469	0.0621837
FBXW5	85.4806	-0.875709	0.241449	3.62689	0.00028686	0.00387485
MAVS	16.1465	-0.873989	0.409226	2.13571	0.0327031	0.157793
TRMT13	20.141	-0.872056	0.371088	2.35	0.0187735	0.106912
NDUFS2	58.3645	-0.871743	0.256327	3.40089	0.000671659	0.00780386
NLRC5	35.7757	-0.870656	0.316075	2.75459	0.00587663	0.0444175
XPA	52.2868	-0.869132	0.259823	3.3451	0.000822532	0.00920417
TMEM56-RWDD3	19.1922	-0.868924	0.396136	2.1935	0.0282714	0.143211
NAAA	25.9084	-0.868786	0.336563	2.58135	0.00984159	0.066101
PCSK7	101.387	-0.868552	0.224677	3.86579	0.000110732	0.00167897
TOLLIP	18.8034	-0.867105	0.406532	2.13293	0.0329305	0.158385
PTGES2	24.744	-0.866989	0.373966	2.31836	0.0204297	0.113675
CARS2	23.9723	-0.866978	0.349758	2.47879	0.0131828	0.081669
TCIRG1	49.9616	-0.866715	0.278059	3.11702	0.00182689	0.0178423
CCDC102A	17.1228	-0.862104	0.404698	2.13024	0.0331516	0.158944
NFATC3	39.6246	-0.860693	0.297456	2.89352	0.00380953	0.0315885
TASOR	41.3599	-0.860202	0.297311	2.89327	0.0038125	0.0315885
GTF2H2	21.221	-0.858975	0.374875	2.29136	0.0219425	0.118822
FAM217B	23.2918	-0.858678	0.362739	2.36721	0.0179229	0.103428
ELP5	27.2029	-0.858665	0.347824	2.46868	0.0135614	0.0837576
DEXI	24.4296	-0.858459	0.375394	2.28682	0.0222063	0.119871
TSR3	56.9395	-0.857744	0.261147	3.28452	0.00102155	0.0111034
IREB2	22.5873	-0.857235	0.365383	2.34613	0.0189697	0.107827
GNPAT	31.9671	-0.857067	0.308681	2.77654	0.00549403	0.0423396
RASSF1	120.614	-0.855401	0.244911	3.4927	0.000478168	0.00591855
PDK3	18.4581	-0.854955	0.39281	2.17651	0.0295169	0.146979
SMIM14	26.5718	-0.853762	0.334454	2.55271	0.0106889	0.0703126
NPRL2	21.5899	-0.85177	0.367802	2.31584	0.020567	0.113813
PXN	34.8061	-0.850531	0.304113	2.79676	0.00516177	0.0402393
GIMAP2	47.7543	-0.847514	0.279923	3.02767	0.00246446	0.0224429
TRIM56	45.516	-0.847164	0.289391	2.92741	0.00341803	0.028953
ASAH1	49.7667	-0.84588	0.280442	3.01624	0.0025593	0.0231943
FBH1	16.9696	-0.844162	0.39726	2.12496	0.0335899	0.160577
NCOA4	27.2016	-0.841406	0.334268	2.51716	0.0118306	0.0754495
TSNAX	29.5019	-0.840375	0.326505	2.57385	0.0100573	0.0671778
WDR54	30.8366	-0.839732	0.315966	2.65767	0.00786833	0.0555546
TMED1	18.158	-0.839209	0.401413	2.09064	0.0365605	0.169915
DYRK2	49.7004	-0.836965	0.266253	3.14349	0.00166946	0.0166509
DPH5	26.6787	-0.836575	0.33989	2.46131	0.013843	0.0850633
TFEB	20.3535	-0.836347	0.377169	2.21743	0.0265936	0.13634
HENMT1	31.9008	-0.83615	0.355713	2.35063	0.0187417	0.106831
EI24	18.8772	-0.835223	0.40063	2.08478	0.0370896	0.171052
ZADH2	19.9795	-0.834671	0.376292	2.21815	0.0265448	0.136205
RPS6KB2	43.3013	-0.833121	0.27608	3.01768	0.00254718	0.0231268
GZMM	409.43	-0.832516	0.237037	3.51218	0.000444453	0.00558096
GFI1	16.7974	-0.831259	0.416566	1.9955	0.0459879	0.198834
SGSM3	18.6999	-0.831012	0.410095	2.02639	0.0427247	0.188318
DENND2D	90.3085	-0.830826	0.248881	3.33824	0.0008431	0.00939528
CALCOCO1	28.5261	-0.830225	0.332329	2.4982	0.0124825	0.0785547
MRPS27	18.5015	-0.828154	0.385087	2.15057	0.0315105	0.153885
LRRC47	19.3027	-0.826317	0.379584	2.1769	0.0294879	0.146955
PAXIP1-AS1	18.8293	-0.822429	0.389408	2.112	0.0346865	0.163248
UCP2	211.263	-0.82054	0.200882	4.08469	4.4136e-05	0.000749817
CTSW	534.32	-0.820416	0.262603	3.12417	0.00178309	0.0175275
CDKN2D	109.118	-0.818065	0.226147	3.61741	0.000297567	0.00398398
CROCCP2	21.2713	-0.816308	0.37951	2.15095	0.0314802	0.153885
OXA1L	31.0295	-0.816008	0.309436	2.63708	0.00836234	0.0582961
NOP53	685.233	-0.815599	0.194792	4.18702	2.82643e-05	0.000516335
DAXX	30.3481	-0.812778	0.314731	2.58245	0.00981007	0.0659624
ITGA6	26.42	-0.810786	0.335576	2.4161	0.0156876	0.0933711
AC004156.1	88.5601	-0.807274	0.227286	3.5518	0.000382604	0.00493722
ADD3	98.0545	-0.805944	0.22965	3.50945	0.000449034	0.00561525
SMARCA4	18.9797	-0.805305	0.376195	2.14066	0.0323017	0.156477
IRAK1	31.9555	-0.80031	0.371339	2.1552	0.0311463	0.15271
ZFPM1	49.2566	-0.799739	0.279363	2.86273	0.00420013	0.034199
CLCN3	18.5993	-0.799636	0.394966	2.02457	0.0429116	0.188867
RPN2	90.307	-0.799461	0.235636	3.39278	0.000691875	0.00799281
APOL2	30.2039	-0.798744	0.319531	2.49974	0.0124284	0.0784537
LAMTOR1	60.1904	-0.794855	0.255315	3.11324	0.00185046	0.0180435
ABTB1	40.5188	-0.790655	0.296102	2.67021	0.00758032	0.0537087
BAG6	25.9016	-0.789702	0.345681	2.28448	0.0223432	0.120348
PEX16	42.7029	-0.789451	0.307272	2.56923	0.0101926	0.0677594
SLC35C2	31.79	-0.78816	0.312465	2.5224	0.0116558	0.0748857
GTF3C1	40.4278	-0.787487	0.338481	2.32654	0.01999	0.112363
AC068775.1	52.5637	-0.786273	0.294292	2.67174	0.00754592	0.0535275
PHB2	118.991	-0.785588	0.208056	3.77585	0.000159465	0.00230275
CHID1	20.6927	-0.783974	0.379695	2.06474	0.0389473	0.175887
VIM-AS1	22.8902	-0.782432	0.36993	2.11508	0.0344229	0.162597
CA5B	25.9125	-0.780786	0.345082	2.26261	0.0236596	0.125324
RNPEPL1	107.011	-0.780155	0.215577	3.61891	0.000295843	0.00397456
CLPTM1	23.055	-0.779992	0.351369	2.21986	0.026428	0.135874
GGA1	40.8635	-0.777425	0.300811	2.58443	0.00975408	0.0657036
EPB41L4A-AS1	95.2855	-0.775834	0.253288	3.06305	0.00219095	0.0207627
ZNF224	20.9879	-0.770487	0.362605	2.12486	0.033598	0.160577
CDKN2AIPNL	23.4434	-0.769982	0.355973	2.16304	0.0305384	0.150582
MTG1	20.7805	-0.76985	0.368709	2.08796	0.0368015	0.170421
RFXANK	32.9112	-0.769484	0.330895	2.32546	0.0200473	0.11258
SSBP3	22.2127	-0.767353	0.369317	2.07776	0.0377311	0.173101
CCNQ	27.5676	-0.765392	0.325263	2.35315	0.0186152	0.106635
TAPBPL	23.2078	-0.763192	0.360096	2.11942	0.0340554	0.161418
NHLRC3	29.7638	-0.762807	0.313653	2.43201	0.0150153	0.0901662
AC004151.1	113.964	-0.759168	0.222641	3.40983	0.000650039	0.00764048
PNISR	371.41	-0.758701	0.18593	4.08058	4.49243e-05	0.000761078
IGBP1	86.9458	-0.758333	0.260796	2.90776	0.00364024	0.0304945
CENPB	37.2211	-0.756565	0.299385	2.52706	0.0115021	0.0742897
DBP	24.3419	-0.754953	0.348913	2.16373	0.0304853	0.150442
GMIP	23.0524	-0.75406	0.355915	2.11865	0.03412	0.161418
MKKS	23.1341	-0.752406	0.346984	2.16842	0.030127	0.14948
BTN3A3	29.972	-0.752213	0.329143	2.28537	0.0222913	0.120175
TMEM101	22.9711	-0.751722	0.354348	2.12142	0.0338862	0.161418
SNX17	65.6066	-0.750212	0.247408	3.03228	0.00242714	0.0222031
YIPF3	34.0531	-0.748344	0.317473	2.35719	0.0184141	0.105859
PMPCA	25.1812	-0.746252	0.339279	2.19952	0.0278407	0.1413
AC011448.1	45.2088	-0.738902	0.297332	2.48511	0.0129513	0.0807292
FASTK	26.5683	-0.737391	0.366326	2.01294	0.044121	0.19293
HOTAIRM1	35.3078	-0.736321	0.302519	2.43396	0.0149346	0.0897739
ZAP70	97.7552	-0.735591	0.216168	3.40286	0.000666838	0.00779936
EEF2	498.172	-0.734653	0.161338	4.5535	5.27609e-06	0.000116362
DYM	28.5864	-0.732224	0.319082	2.29478	0.0217457	0.118013
LUC7L3	187.915	-0.729007	0.192886	3.77948	0.000157157	0.00227484
SLFN5	133.704	-0.726918	0.242857	2.9932	0.00276068	0.0245147
GMPR2	29.0868	-0.721032	0.322778	2.23383	0.025494	0.133047
GUSB	30.977	-0.720194	0.315756	2.28086	0.022557	0.121069
SPN	39.9543	-0.715863	0.289308	2.47439	0.0133462	0.0825969
CD320	85.9328	-0.715627	0.265702	2.69334	0.00707396	0.0511976
NOSIP	110.272	-0.715553	0.218714	3.27165	0.00106923	0.0115154
AL031282.2	24.9381	-0.714564	0.347544	2.05604	0.0397787	0.178577
TCOF1	22.7097	-0.714501	0.356695	2.00312	0.0451648	0.196081
KIN	41.5511	-0.714368	0.293502	2.43395	0.0149352	0.0897739
UQCRFS1	89.5556	-0.713211	0.245654	2.90331	0.00369237	0.0308036
SYNE1	125.811	-0.711325	0.205386	3.46336	0.000533466	0.00651
FNTA	45.5616	-0.708198	0.27443	2.58062	0.00986243	0.0661678
SAMHD1	105.368	-0.70799	0.215869	3.27973	0.00103908	0.0112536
AC004922.1	23.6138	-0.706262	0.349838	2.01882	0.0435056	0.190651
MEI1	30.9408	-0.703385	0.340951	2.06301	0.0391118	0.176498
SSBP4	123.757	-0.7029	0.237854	2.95518	0.00312487	0.0271524
FBXL15	47.4092	-0.702415	0.270247	2.59916	0.00934527	0.0635415
TCF7	40.4815	-0.699997	0.288808	2.42375	0.0153613	0.0921528
KLRK1	108.653	-0.699554	0.241326	2.8988	0.00374596	0.0311649
IFRD2	25.2201	-0.693106	0.335473	2.06605	0.0388234	0.175719
NDUFB7	194.657	-0.691715	0.201869	3.42655	0.000611295	0.00729823
BSDC1	27.6118	-0.689831	0.328915	2.09729	0.0359679	0.168242
EIF3G	364.959	-0.686927	0.203049	3.38306	0.000716828	0.0081875
APOL3	33.588	-0.686622	0.305152	2.2501	0.0244425	0.128461
MAN1B1	24.1695	-0.685825	0.341434	2.00866	0.0445729	0.194206
TRAF3IP3	152.085	-0.684626	0.205536	3.33093	0.000865578	0.00959731
RPL15	2371.35	-0.684307	0.163535	4.18447	2.85836e-05	0.000520599
RTCB	30.6242	-0.681113	0.324535	2.09873	0.0358404	0.167985
LAIR1	29.9826	-0.678943	0.327046	2.07598	0.0378954	0.173723
MRPS10	29.998	-0.678903	0.316997	2.14167	0.0322198	0.156205
TBC1D10C	168.768	-0.678639	0.201905	3.36118	0.000776094	0.00873285
CFLAR	205.185	-0.677945	0.192439	3.52291	0.000426828	0.00539315
AC008555.4	29.0104	-0.677432	0.327454	2.06878	0.0385666	0.174818
TAPBP	185.456	-0.676675	0.210133	3.22022	0.00128091	0.0133713
RPL7	1504.48	-0.675324	0.174942	3.86027	0.00011326	0.00171302
TLE1	38.354	-0.673845	0.321542	2.09567	0.0361115	0.168475
AC046185.3	31.0716	-0.672519	0.306629	2.19327	0.028288	0.143211
NCBP2AS2	80.3174	-0.67162	0.238168	2.81994	0.00480327	0.037932
EHD1	69.1261	-0.670896	0.246012	2.72709	0.00638963	0.0471941
ASB8	33.092	-0.670221	0.30332	2.20962	0.0271317	0.13854
RPL17-C18orf32	1861.51	-0.670166	0.166489	4.02529	5.69057e-05	0.000932792
FAM173A	95.3962	-0.668341	0.255943	2.61129	0.00902027	0.0619569
DBNL	80.7888	-0.667535	0.238868	2.79458	0.00519678	0.0404602
FIBP	59.7085	-0.66374	0.250373	2.65101	0.00802525	0.0562823
AHNAK	108.235	-0.663171	0.231652	2.8628	0.00419921	0.034199
SERPINB6	66.2459	-0.660237	0.256301	2.57602	0.00999441	0.0668314
P4HB	165.723	-0.659687	0.209887	3.14305	0.00167195	0.0166509
SMARCC2	29.9653	-0.657675	0.319993	2.05528	0.0398522	0.178775
YDJC	38.0011	-0.657538	0.285549	2.30272	0.0212946	0.116353
STK10	80.6271	-0.657095	0.231146	2.84277	0.00447236	0.0359957
ZBTB16	57.4025	-0.656275	0.290694	2.25762	0.0239696	0.126744
SH3BP2	32.1221	-0.655792	0.314137	2.0876	0.0368342	0.170421
ATP5F1A	132.45	-0.655767	0.213526	3.07113	0.00213247	0.0202718
ERGIC3	37.3294	-0.655321	0.302092	2.16927	0.0300619	0.14948
LYPLA1	37.5873	-0.651161	0.291571	2.23328	0.0255305	0.133047
APH1A	60.1185	-0.650726	0.253302	2.56897	0.0102002	0.0677594
SMARCE1	66.6759	-0.646723	0.241592	2.67692	0.0074302	0.0530167
SUGP2	41.2679	-0.646001	0.280159	2.30583	0.02112	0.115607
ZNF22	53.6462	-0.64585	0.266937	2.41949	0.0155423	0.092858
CSK	94.2672	-0.645204	0.224076	2.8794	0.00398435	0.0327884
ARID1A	56.7771	-0.64429	0.269207	2.39329	0.0166981	0.0976785
BTN3A2	118.481	-0.643546	0.208357	3.08867	0.00201052	0.0193245
BLOC1S4	68.2366	-0.64318	0.239055	2.69052	0.00713417	0.0514492
AP2S1	99.39	-0.642136	0.21918	2.92972	0.00339264	0.0289022
AKR7A2	57.3229	-0.63882	0.255722	2.49811	0.0124859	0.0785547
UTP3	33.7987	-0.638592	0.309157	2.06559	0.038867	0.175761
TSR2	57.6833	-0.638301	0.249745	2.55582	0.0105939	0.0697634
ZNF292	86.2995	-0.637355	0.228236	2.79253	0.00522977	0.0405608
CCND3	282.971	-0.635625	0.208435	3.04951	0.00229214	0.0213874
MRPS23	34.9898	-0.634463	0.303087	2.09333	0.0363194	0.1691
MOB3A	29.1028	-0.634137	0.317407	1.99787	0.0457312	0.198114
KLRC4-KLRK1	110.835	-0.630937	0.219092	2.87979	0.00397946	0.0327884
CCNC	38.3408	-0.630127	0.285786	2.20489	0.0274617	0.139727
BIN1	148.622	-0.629124	0.207042	3.03863	0.00237658	0.0219391
SLC9A3R1	87.4732	-0.628149	0.247499	2.53798	0.0111494	0.0725546
OXLD1	47.4726	-0.627306	0.264761	2.36933	0.0178203	0.10313
CRBN	59.2092	-0.626389	0.250039	2.50516	0.0122395	0.0774062
TRAPPC2	45.671	-0.624857	0.276313	2.26141	0.0237337	0.125607
CTDSP1	68.7169	-0.623278	0.270766	2.30191	0.0213403	0.116447
SHKBP1	42.4552	-0.621522	0.28154	2.20758	0.0272735	0.13912
SUN2	147.038	-0.620678	0.217334	2.85587	0.0042919	0.0347535
LENG8	62.6331	-0.619255	0.302748	2.04545	0.0408109	0.181465
SLC25A11	46.2928	-0.619036	0.286753	2.15878	0.0308673	0.151822
CCDC69	50.6943	-0.617861	0.277338	2.22783	0.0258921	0.133989
EIF3E	313.189	-0.617276	0.188835	3.26887	0.00107979	0.0115501
CD48	751.994	-0.615843	0.191364	3.21818	0.00129007	0.0134438
MT-ND6	105.75	-0.61207	0.255991	2.39098	0.0168035	0.0980876
UCHL5	41.6094	-0.611883	0.290195	2.10853	0.0349855	0.164486
PEPD	41.0275	-0.60946	0.281458	2.16536	0.0303598	0.15019
SYNJ2BP-COX16	38.5386	-0.609277	0.285888	2.13117	0.0330748	0.158877
ZNF24	51.0699	-0.608698	0.263784	2.30756	0.0210236	0.115288
NME1-NME2	258.479	-0.605574	0.206798	2.92833	0.00340787	0.0289476
UBE2Q1	35.4682	-0.605406	0.295878	2.04613	0.0407431	0.181298
TNFRSF14	57.4153	-0.603597	0.252211	2.39322	0.0167012	0.0976785
ANAPC5	79.0067	-0.603059	0.242139	2.49055	0.0127545	0.079831
CASP8	91.1688	-0.602473	0.224255	2.68655	0.0072195	0.051941
COMMD8	53.2345	-0.602132	0.288863	2.08449	0.0371154	0.171052
EIF2S3	137.756	-0.601502	0.206102	2.91846	0.00351763	0.0296311
TRGC2	194.121	-0.600766	0.214429	2.8017	0.00508345	0.0398335
NME2	258.258	-0.598809	0.206227	2.90364	0.00368849	0.0308036
DDHD1	48.7103	-0.59763	0.265546	2.25057	0.0244127	0.128415
IL7R	1442.79	-0.597332	0.252568	2.36503	0.0180284	0.103938
AC040162.1	66.0194	-0.597133	0.25857	2.30937	0.0209231	0.114944
CCM2	73.1686	-0.596836	0.2422	2.46422	0.013731	0.0845467
ITGAL	97.4071	-0.596832	0.234817	2.54169	0.0110317	0.0720207
CCDC115	43.9105	-0.595362	0.272514	2.1847	0.0289109	0.145273
SRSF5	495.761	-0.594932	0.190637	3.12075	0.00180388	0.0176713
ATM	130.489	-0.594595	0.209119	2.84333	0.00446447	0.0359957
GZMB	300.793	-0.594374	0.272131	2.18415	0.0289513	0.145356
GPATCH8	84.0216	-0.593777	0.221881	2.67611	0.00744829	0.0530833
GAS5	466.283	-0.591099	0.197416	2.99419	0.00275176	0.0244713
ZBTB38	95.613	-0.587576	0.244483	2.40334	0.0162459	0.0957548
ANKRD36BP1	73.7328	-0.587377	0.252758	2.32387	0.0201323	0.112849
MRPL10	51.4836	-0.585663	0.263116	2.22588	0.0260224	0.134549
UBE2Q2	43.8665	-0.581353	0.27412	2.1208	0.0339388	0.161418
TUFM	136.619	-0.581239	0.210335	2.76339	0.00572045	0.0435314
VAMP5	111.668	-0.579726	0.214799	2.69892	0.00695648	0.0504075
VHL	50.5955	-0.57957	0.283834	2.04194	0.0411577	0.182873
ARHGAP25	48.2041	-0.576443	0.279838	2.05992	0.0394062	0.177167
PSMC5	146.567	-0.573328	0.204231	2.80725	0.00499657	0.0393051
SRM	78.2684	-0.57298	0.229762	2.4938	0.0126382	0.0792668
ADAR	74.4616	-0.572495	0.252794	2.26467	0.0235331	0.124871
RPA2	69.3248	-0.572377	0.235158	2.43401	0.0149326	0.0897739
AC243919.1	815.146	-0.571389	0.197901	2.88724	0.00388639	0.0321568
APMAP	138.284	-0.568439	0.229129	2.48087	0.0131063	0.081361
FP671120.5	373.455	-0.567655	0.259701	2.1858	0.02883	0.145068
TAP1	92.7906	-0.564173	0.216979	2.60013	0.00931882	0.0634328
AL096870.3	50.0851	-0.563777	0.263977	2.13571	0.0327034	0.157793
SBNO1	54.9252	-0.561323	0.253039	2.21832	0.0265328	0.136205
SAMD3	132.515	-0.560441	0.197618	2.83598	0.00456852	0.0366024
TLE5	526.975	-0.559712	0.167174	3.34808	0.000813742	0.00912263
MAF1	98.4347	-0.559108	0.232575	2.40399	0.0162171	0.0956779
LMAN2	132.088	-0.559078	0.201674	2.77219	0.00556804	0.042693
PRKCB	42.6566	-0.558907	0.276592	2.02069	0.0433119	0.190215
THAP11	45.6602	-0.554703	0.268576	2.06534	0.0388906	0.175761
TSSC4	46.7484	-0.55353	0.269418	2.05454	0.0399233	0.178829
TCEAL8	42.3674	-0.553318	0.27749	1.99401	0.0461512	0.198939
MRPL14	72.5801	-0.548236	0.238821	2.2956	0.021699	0.117925
UFC1	203.524	-0.547649	0.190687	2.87198	0.00407909	0.033432
RAP1B	356.16	-0.545978	0.182545	2.99093	0.00278129	0.0246085
AP2M1	110.589	-0.545913	0.235877	2.3144	0.0206458	0.114112
RRP1B	49.7716	-0.543983	0.26213	2.07525	0.0379638	0.173799
ARPC1B	505.093	-0.54119	0.172987	3.12849	0.00175705	0.0173345
TFDP2	53.4752	-0.538841	0.261347	2.06178	0.0392284	0.176761
HOPX	346.706	-0.536668	0.222519	2.41178	0.0158747	0.0940601
GLTP	50.1956	-0.534902	0.260829	2.05077	0.0402889	0.180068
ARFGAP2	51.1306	-0.532483	0.255399	2.08491	0.0370777	0.171052
ARPC5L	200.365	-0.532019	0.196935	2.7015	0.00690269	0.0501375
M6PR	95.6302	-0.531311	0.219349	2.42222	0.015426	0.0924491
RPL9	1598.2	-0.524215	0.20919	2.50593	0.0122128	0.0773312
ZNF276	55.3993	-0.523164	0.251125	2.08328	0.0372253	0.171429
CCNDBP1	100.152	-0.512743	0.212347	2.41464	0.0157506	0.0935628
TMEM109	66.0049	-0.511075	0.240718	2.12313	0.033743	0.161143
SEC11A	202.15	-0.50875	0.183653	2.77018	0.00560258	0.0428495
TSPAN14	61.7101	-0.508593	0.245607	2.07076	0.0383817	0.174371
NUDT16L1	66.0236	-0.507689	0.237042	2.14177	0.0322123	0.156205
NUCB2	106.556	-0.506744	0.239762	2.11353	0.0345556	0.162843
SELPLG	78.8158	-0.503604	0.236354	2.13072	0.0331123	0.158882
SIGIRR	142.498	-0.502597	0.211131	2.3805	0.017289	0.100728
NECAP2	58.5979	-0.501863	0.242673	2.06806	0.038634	0.174993
CASP4	166.436	-0.49962	0.191152	2.61373	0.00895606	0.0617255
AC245033.1	164.585	-0.497449	0.200234	2.48434	0.0129793	0.080821
TRADD	91.5914	-0.496624	0.234647	2.11648	0.0343041	0.162163
EXOSC6	82.8993	-0.496259	0.237849	2.08644	0.0369385	0.170756
MTPN	128.56	-0.494919	0.204692	2.41788	0.0156113	0.0930998
FIS1	168.829	-0.493341	0.202182	2.44008	0.014684	0.0890583
PKN1	90.2628	-0.493149	0.240081	2.0541	0.0399662	0.178889
STUB1	141.494	-0.49144	0.204768	2.39999	0.0163956	0.0962986
CTSS	71.9707	-0.490627	0.231575	2.11865	0.0341199	0.161418
CPNE1	103.788	-0.490405	0.206508	2.37475	0.0175609	0.10192
MFSD10	95.8438	-0.488724	0.244753	1.99681	0.0458462	0.198471
HLA-F	389.785	-0.487227	0.17685	2.75503	0.00586874	0.0444175
LAMTOR2	78.9482	-0.484977	0.24152	2.00802	0.0446409	0.194362
EPB41	103.658	-0.481232	0.219991	2.18751	0.0287054	0.144841
MLLT6	92.1797	-0.479941	0.228791	2.09772	0.0359294	0.168242
CCT7	107.744	-0.478701	0.225937	2.11874	0.0341128	0.161418
PABPN1	149.094	-0.477259	0.20428	2.33629	0.0194761	0.110395
AL121845.3	203.892	-0.473677	0.187437	2.52713	0.0114999	0.0742897
UBTF	70.256	-0.472594	0.235419	2.00746	0.044701	0.194485
LIMD2	116.203	-0.466324	0.209316	2.22785	0.0258907	0.133989
TTC3	89.5744	-0.466143	0.227797	2.04631	0.0407257	0.181298
ATP6AP2	128.928	-0.465065	0.223634	2.07958	0.0375637	0.172463
PSMD7	80.0447	-0.461854	0.226612	2.03808	0.0415419	0.18431
EMP3	499.275	-0.461741	0.175838	2.62595	0.00864069	0.0599608
CD47	195.755	-0.461573	0.179544	2.5708	0.0101464	0.06755
CELF2	241.742	-0.459819	0.205986	2.23228	0.0255962	0.13314
THRAP3	140.009	-0.459657	0.208271	2.20702	0.0273128	0.139204
LCK	271.047	-0.457422	0.181576	2.51917	0.0117631	0.0752355
CD247	302.367	-0.455449	0.173917	2.61876	0.00882491	0.0610994
ARRB2	101.105	-0.453172	0.209351	2.16465	0.0304142	0.150336
CCT3	111.94	-0.44693	0.204863	2.1816	0.0291392	0.145696
SSR2	465.137	-0.446146	0.166906	2.67304	0.00751669	0.0533826
DDX17	269.359	-0.445897	0.186021	2.39703	0.0165288	0.0968569
ATP5PB	109.979	-0.442494	0.205051	2.15797	0.0309304	0.151897
FMNL1	114.216	-0.441531	0.205987	2.14349	0.0320739	0.156122
PRELID1	242.558	-0.438975	0.193218	2.27192	0.0230915	0.123221
EIF3F	410.175	-0.438385	0.173333	2.52914	0.0114342	0.07409
MSN	264.651	-0.437379	0.181388	2.41129	0.0158964	0.0940601
RPS19BP1	151.443	-0.437029	0.19313	2.26288	0.0236433	0.125324
ZRANB2	159.781	-0.423764	0.188571	2.24724	0.0246248	0.129307
C1QBP	142.812	-0.421219	0.19719	2.1361	0.0326712	0.157793
AC004086.1	3805.54	-0.420738	0.162366	2.59128	0.00956188	0.064652
BRK1	191.469	-0.418797	0.185989	2.25173	0.0243395	0.128141
GTF3A	331.139	-0.414478	0.172327	2.40518	0.0161643	0.0954592
ARL6IP4	225.15	-0.411341	0.20046	2.05199	0.040171	0.179673
CORO1A	683.651	-0.404741	0.174733	2.31634	0.0205398	0.11377
DPP7	129.783	-0.404598	0.202471	1.9983	0.0456837	0.19805
RPL18A	3148.19	-0.392374	0.168903	2.32308	0.0201749	0.112983
EEF1D	1611.01	-0.356926	0.155089	2.30142	0.0213676	0.116447
ERP29	339.849	-0.354351	0.17126	2.06909	0.0385381	0.174818
SELENOW	227.695	0.343468	0.17167	-2.00074	0.0454205	0.197049
SNRPF	217.784	0.360426	0.174862	-2.0612	0.0392838	0.176879
ABRACL	195.091	0.367069	0.184319	-1.99148	0.0464276	0.199705
KRTCAP2	279.367	0.367305	0.18141	-2.02472	0.0428964	0.188867
POLR2L	360.123	0.367478	0.170903	-2.15022	0.0315381	0.153885
NCL	525.659	0.369473	0.175616	-2.10387	0.0353899	0.166258
COPS9	239.863	0.370307	0.177294	-2.08866	0.0367386	0.170421
COX6B1	456.259	0.376088	0.168132	-2.23686	0.0252956	0.132143
NDUFA1	382.969	0.382161	0.162496	-2.35182	0.0186816	0.106635
RNASEK	143.149	0.383404	0.192242	-1.99439	0.0461099	0.198939
YWHAZ	270.955	0.386391	0.170425	-2.26723	0.0233765	0.124149
PRPF4B	155.405	0.393253	0.18765	-2.09567	0.0361117	0.168475
CD44	219.31	0.395507	0.195504	-2.02302	0.0430712	0.189432
NDUFB4	213.881	0.398476	0.182773	-2.18017	0.0292451	0.146105
SNRPB2	148.438	0.401276	0.199225	-2.01418	0.0439904	0.192497
HNRNPA2B1	657.547	0.405306	0.158264	-2.56094	0.0104389	0.068967
SERF2	1367.35	0.406533	0.154481	-2.6316	0.00849836	0.0591084
COX7C	969.016	0.408925	0.154257	-2.65093	0.00802708	0.0562823
PPIA	415.835	0.409375	0.166155	-2.46382	0.0137464	0.0845559
MIF	536.517	0.410583	0.17763	-2.31145	0.0208081	0.114728
TMA7	1231.41	0.4135	0.153184	-2.69937	0.00694718	0.0504003
CORO1B	712.987	0.415101	0.170463	-2.43514	0.0148862	0.0897462
IL2RG	178.664	0.419741	0.190506	-2.2033	0.0275736	0.140179
SPOCK2	277.082	0.420016	0.181319	-2.31645	0.0205336	0.11377
ANXA1	688.965	0.4204	0.170339	-2.46801	0.0135865	0.0838274
UBXN4	163.522	0.424791	0.200977	-2.11363	0.0345467	0.162843
EIF4G2	212.559	0.425732	0.180608	-2.35721	0.0184126	0.105859
YTHDC1	126.987	0.426846	0.200299	-2.13105	0.0330851	0.158877
SLC25A5	275.453	0.429072	0.181227	-2.36759	0.0179041	0.103418
KMT2E	258.347	0.432846	0.180155	-2.40263	0.0162778	0.0958495
DEK	260.365	0.433763	0.189692	-2.28667	0.0222152	0.119871
IFI27L2	124.728	0.44097	0.20344	-2.16756	0.0301919	0.14948
HMGN1	369.431	0.444606	0.167901	-2.64803	0.00809634	0.0567025
BAX	179.89	0.444827	0.181074	-2.4566	0.014026	0.0858642
FRG1	94.6198	0.446921	0.217073	-2.05885	0.0395082	0.177494
AAK1	200.325	0.448962	0.215854	-2.07993	0.037532	0.172448
PABPC1	344.945	0.450501	0.186532	-2.41514	0.015729	0.0935258
GOLGA8B	113.738	0.455257	0.208675	-2.18165	0.0291354	0.145696
DNAJA2	96.0487	0.457399	0.215576	-2.12175	0.0338583	0.161418
UQCRQ	225.378	0.461306	0.181938	-2.53551	0.0112283	0.0728341
CIB1	292.234	0.461429	0.204889	-2.25209	0.0243163	0.128131
CHCHD7	63.1687	0.461603	0.231467	-1.99425	0.046125	0.198939
GNAI3	84.5319	0.463008	0.211083	-2.19349	0.0282719	0.143211
IFITM1	411.895	0.463895	0.198985	-2.3313	0.0197374	0.111459
GBP5	104.917	0.467353	0.214577	-2.17802	0.0294043	0.146659
OAZ1	700.932	0.469812	0.170791	-2.7508	0.00594508	0.0446802
RAB11A	67.9448	0.469942	0.227877	-2.06226	0.0391828	0.176687
SNHG7	87.457	0.472133	0.22206	-2.12615	0.0334907	0.160316
WIPF1	127.818	0.472134	0.193622	-2.43843	0.0147512	0.0893323
RSRP1	187.06	0.473543	0.188037	-2.51835	0.0117906	0.075274
USP34	77.4477	0.473865	0.228397	-2.07474	0.0380106	0.173799
MXD4	125.767	0.47491	0.226037	-2.10103	0.0356383	0.167166
AKAP9	181.75	0.475829	0.182509	-2.60716	0.00912964	0.0623551
ICE1	54.4761	0.481072	0.241087	-1.99543	0.0459958	0.198834
ENY2	145.472	0.481701	0.207505	-2.3214	0.0202654	0.113092
PRDX6	153.579	0.484307	0.195756	-2.47403	0.0133599	0.0825971
POLR2K	122.05	0.484414	0.209649	-2.31059	0.0208555	0.114815
MBNL1	191.987	0.484509	0.18749	-2.58419	0.00976075	0.0657036
RNMT	89.1018	0.485175	0.222276	-2.18276	0.0290537	0.145696
TRMT10C	75.171	0.485242	0.237151	-2.04613	0.0407436	0.181298
HNRNPU	340.902	0.487015	0.173264	-2.81083	0.00494138	0.0389214
TERF2IP	171.593	0.487047	0.202979	-2.3995	0.0164176	0.0962986
BDP1	100.272	0.48718	0.207142	-2.35192	0.0186768	0.106635
ANP32E	126.136	0.491865	0.206716	-2.37942	0.0173398	0.100813
RAN	302.246	0.491961	0.187142	-2.62881	0.0085683	0.0595266
FGFR1OP2	143.314	0.494221	0.189151	-2.61284	0.00897938	0.0618161
SNRPG	201.017	0.494222	0.198414	-2.49086	0.0127433	0.079831
CIAO2B	152.574	0.497383	0.19898	-2.49967	0.012431	0.0784537
CDV3	185.329	0.4983	0.182417	-2.73165	0.00630186	0.0468966
SNHG8	325.718	0.498953	0.176934	-2.81999	0.00480247	0.037932
CHD3	75.4293	0.498983	0.222583	-2.24178	0.0249754	0.130808
HNRNPDL	474.737	0.502525	0.162961	-3.08372	0.00204428	0.019587
SLIRP	71.0014	0.505022	0.235703	-2.14262	0.0321436	0.156205
BOLA2B	68.1857	0.505897	0.226566	-2.23289	0.0255565	0.133047
CCDC107	177.961	0.512273	0.200146	-2.55949	0.0104825	0.0691799
COQ10B	59.2586	0.512974	0.244765	-2.09578	0.0361017	0.168475
MZT2A	180.871	0.514059	0.188525	-2.72674	0.0063963	0.0471941
DEGS1	66.2234	0.514367	0.235297	-2.18603	0.0288132	0.145068
GLIPR2	108.167	0.514397	0.230671	-2.23	0.0257474	0.133582
NDUFA6	127.893	0.514904	0.21047	-2.44645	0.0144271	0.0877638
USP15	106.574	0.515262	0.222017	-2.32082	0.0202967	0.113092
PRKCQ-AS1	62.6063	0.515283	0.246836	-2.08755	0.036838	0.170421
MRPS5	70.3807	0.515483	0.245799	-2.09717	0.0359785	0.168242
PPP3CA	63.9306	0.516336	0.239165	-2.15891	0.0308568	0.151822
GNPTAB	80.419	0.519109	0.230402	-2.25306	0.0242554	0.127921
NORAD	74.0624	0.519363	0.240008	-2.16394	0.0304686	0.150442
EIF3J	57.4316	0.520871	0.261343	-1.99305	0.0462555	0.199247
MICOS10	170.743	0.521342	0.192616	-2.70663	0.00679692	0.0494877
MAPK1IP1L	56.7778	0.521501	0.238493	-2.18665	0.0287682	0.145037
ATP5MD	392.527	0.523272	0.16451	-3.18079	0.00146875	0.0149462
NSD3	167.523	0.524987	0.206138	-2.54677	0.0108725	0.0712884
COPA	55.6345	0.526061	0.251378	-2.09271	0.0363749	0.169182
ATP5IF1	300.693	0.526249	0.178552	-2.94731	0.00320552	0.027655
ATP2B1	69.2199	0.526599	0.225837	-2.33176	0.0197131	0.111426
SEC62	234.962	0.528762	0.184653	-2.86354	0.00418933	0.034199
SAR1A	81.7342	0.530132	0.233162	-2.27367	0.022986	0.122828
SYPL1	50.0143	0.53024	0.258032	-2.05494	0.0398846	0.178788
FUS	368.023	0.531644	0.194906	-2.72769	0.00637796	0.0471736
UPP1	121.607	0.531779	0.256649	-2.07201	0.0382646	0.17423
SRSF3	389.755	0.533172	0.173361	-3.0755	0.00210152	0.0200623
RSBN1	85.9197	0.535656	0.213643	-2.50725	0.0121675	0.0772733
PAFAH1B1	98.9951	0.536734	0.230358	-2.32999	0.0198064	0.111745
CBX3	150.019	0.537724	0.191718	-2.80476	0.00503536	0.0395077
BRD9	63.8159	0.537851	0.249992	-2.15147	0.031439	0.153885
COX7B	307.502	0.538118	0.173775	-3.09664	0.00195729	0.0189632
SYTL2	47.7208	0.53816	0.259771	-2.07167	0.0382961	0.174243
SUZ12	71.4817	0.538471	0.228149	-2.36017	0.0182665	0.10521
ANKRD36B	59.634	0.539098	0.236154	-2.28282	0.022441	0.120767
FNBP1	171.639	0.540975	0.202325	-2.67379	0.00750003	0.0533826
COX6A1	271.555	0.543364	0.17858	-3.04268	0.0023448	0.0217783
NKAP	63.9868	0.545064	0.250223	-2.17832	0.0293824	0.146659
CRIP1	714.044	0.546228	0.161618	-3.37976	0.000725505	0.00825551
RBM39	509.902	0.546673	0.174228	-3.13769	0.00170283	0.0169306
RPA3	84.6566	0.546995	0.227934	-2.39979	0.0164043	0.0962986
RPL22L1	232.421	0.547905	0.180236	-3.03994	0.00236628	0.0218772
ANKRD36	62.3749	0.548108	0.248805	-2.20296	0.0275973	0.140182
HIPK1	61.5785	0.551859	0.245995	-2.24337	0.0248727	0.130383
AL671762.1	59.9879	0.553156	0.273903	-2.01953	0.0434323	0.190605
KLF6	209.907	0.554518	0.208482	-2.65978	0.00781909	0.0552713
CHIC2	50.2562	0.557019	0.261065	-2.13364	0.0328724	0.158268
CHRAC1	51.9478	0.558305	0.252032	-2.21521	0.0267456	0.136888
IFI16	184.477	0.559996	0.221593	-2.52714	0.0114997	0.0742897
FRAT2	41.4107	0.560566	0.272113	-2.06005	0.039394	0.177167
LMO4	53.3491	0.561151	0.264715	-2.11983	0.0340202	0.161418
ATP1A1	49.9833	0.562783	0.253504	-2.22002	0.0264177	0.135874
STT3B	69.2923	0.563612	0.223385	-2.52306	0.011634	0.074825
FBXW7	50.317	0.564327	0.262061	-2.15341	0.0312861	0.153272
SERINC1	65.9692	0.564816	0.255626	-2.20954	0.0271369	0.13854
REEP5	178.713	0.565018	0.187352	-3.01581	0.00256293	0.0231943
CWF19L2	65.9665	0.566429	0.248215	-2.28201	0.0224889	0.120855
COMTD1	39.9255	0.568318	0.279235	-2.03527	0.0418238	0.18529
UQCC2	51.9887	0.572135	0.267032	-2.14257	0.0321475	0.156205
TOMM5	127.985	0.574553	0.194395	-2.9556	0.00312061	0.0271524
CSNK1D	34.2435	0.575383	0.277853	-2.07082	0.0383759	0.174371
HSPB11	62.5853	0.576295	0.238219	-2.41918	0.0155554	0.092858
ERN1	62.8177	0.576617	0.259766	-2.21975	0.0264355	0.135874
LRRC75A	39.0619	0.578363	0.271717	-2.12855	0.0332914	0.159488
FIP1L1	41.8989	0.578434	0.265085	-2.18207	0.0291044	0.145696
CENPC	95.968	0.579134	0.210277	-2.75414	0.0058846	0.0444175
NDFIP1	153.377	0.579703	0.189344	-3.06163	0.00220133	0.0207637
AC093525.2	76.0328	0.58233	0.231184	-2.5189	0.0117722	0.0752355
SNU13	228.234	0.582902	0.17861	-3.26355	0.00110026	0.0117277
GPRIN3	75.8471	0.584111	0.248802	-2.34769	0.0188902	0.107476
RPS26	2333.9	0.584129	0.170861	-3.41874	0.000629117	0.00746692
DHX36	148.668	0.584148	0.199418	-2.92926	0.00339774	0.0289022
PKN2	52.3553	0.584799	0.252982	-2.31163	0.0207983	0.114728
MKNK2	62.7915	0.587217	0.25897	-2.26751	0.0233594	0.124149
GPR171	82.4625	0.588792	0.22447	-2.62303	0.0087152	0.0604088
FXR1	66.9503	0.589649	0.240093	-2.45592	0.0140525	0.0859154
GOLGA8A	116.224	0.590595	0.200955	-2.93894	0.00329341	0.0282525
H2AFV	135.194	0.590914	0.208651	-2.83207	0.00462477	0.0369069
ELOVL5	41.7681	0.59175	0.280198	-2.1119	0.0346953	0.163248
ETNK1	51.47	0.591807	0.249711	-2.36997	0.0177897	0.103051
ACOT13	33.7811	0.592754	0.285986	-2.07267	0.0382029	0.17408
KTN1	148.511	0.593822	0.194575	-3.05189	0.00227404	0.0213874
PAXBP1	33.7744	0.59418	0.292386	-2.03217	0.0421361	0.186265
ATP6V0C	76.9092	0.594478	0.228772	-2.59857	0.00936143	0.0635801
LINC01934	42.7175	0.595657	0.274774	-2.16781	0.030173	0.14948
PRKAR1A	45.4606	0.595989	0.256728	-2.32148	0.0202607	0.113092
ALOX5AP	215.371	0.598786	0.2398	-2.49703	0.0125239	0.0787126
CAPN7	35.1513	0.599731	0.279752	-2.14379	0.0320495	0.156122
EP300	47.2226	0.601383	0.269444	-2.23194	0.0256187	0.133142
RBM8A	207.836	0.602924	0.188721	-3.19479	0.00139932	0.0143269
CSTB	245.915	0.605424	0.188564	-3.21072	0.00132405	0.0137147
SENP3-EIF4A1	127.709	0.60704	0.219554	-2.76488	0.0056943	0.0434414
SLC4A7	68.096	0.607465	0.287356	-2.11398	0.0345171	0.162843
PFDN2	103.117	0.608575	0.208309	-2.9215	0.0034835	0.0294254
CGGBP1	82.038	0.608956	0.232913	-2.61452	0.00893528	0.0616524
HMGB1P6	37.1596	0.609051	0.28404	-2.14425	0.0320131	0.156077
PTPN22	107.312	0.609291	0.211662	-2.8786	0.00399448	0.0328273
CDC42SE2	80.9555	0.610979	0.219087	-2.78876	0.00529108	0.0409316
WSB1	117.008	0.612236	0.203034	-3.01544	0.00256609	0.0231943
AC026470.1	58.3958	0.613059	0.234211	-2.61755	0.00885624	0.0612464
MNAT1	43.1447	0.613277	0.269633	-2.27449	0.0229368	0.122781
ZYX	43.5292	0.613361	0.273709	-2.24092	0.0250312	0.130874
C4orf48	114.107	0.613803	0.208451	-2.9446	0.00323373	0.0278193
SH2D2A	114.429	0.614736	0.229225	-2.6818	0.00732268	0.0524965
PPIL4	48.4159	0.615477	0.255241	-2.41136	0.0158932	0.0940601
IGFLR1	33.1358	0.616624	0.297935	-2.06966	0.0384844	0.174706
RNF114	45.6835	0.618738	0.2671	-2.3165	0.020531	0.11377
CAMTA1	40.7693	0.619146	0.26279	-2.35605	0.0184702	0.106081
SUB1	567.631	0.620348	0.17193	-3.60814	0.000308396	0.00409884
ELOC	73.4156	0.622358	0.225988	-2.75395	0.00588815	0.0444175
LAP3	42.0455	0.622426	0.288362	-2.15849	0.03089	0.151822
TGFB1	171.33	0.625314	0.194722	-3.21131	0.00132129	0.0137147
TAGAP	101.496	0.626787	0.22602	-2.77315	0.0055517	0.0426756
TXLNG	33.222	0.626971	0.282844	-2.21667	0.0266458	0.136492
CBX5	44.4404	0.627047	0.255016	-2.45886	0.013938	0.0854739
HECA	68.7403	0.628663	0.249311	-2.5216	0.0116821	0.0748965
TARSL2	68.8829	0.63126	0.234834	-2.68811	0.00718571	0.0517593
SMARCA2	67.2285	0.631296	0.227717	-2.77228	0.00556654	0.042693
GPR174	45.0094	0.631842	0.303539	-2.08158	0.0373807	0.172014
RHEB	76.155	0.633389	0.226322	-2.79862	0.00513215	0.0401114
SBDS	131.784	0.635517	0.250489	-2.5371	0.0111775	0.0726595
CHCHD10	153.611	0.635649	0.205984	-3.08591	0.00202927	0.019474
COX17	147.1	0.63686	0.219603	-2.90005	0.00373108	0.0310838
PPWD1	31.6866	0.639718	0.316872	-2.01886	0.0435022	0.190651
MYO9B	31.8141	0.640081	0.314747	-2.03364	0.0419884	0.185747
IDS	125.377	0.640436	0.2333	-2.74512	0.00604889	0.045348
YAF2	50.4214	0.641049	0.268821	-2.38467	0.0170946	0.0996909
KANSL2	27.4622	0.641577	0.313516	-2.0464	0.0407175	0.181298
PRDX1	200.817	0.642092	0.1871	-3.4318	0.00059958	0.00717249
ANXA5	119.216	0.642324	0.217205	-2.95723	0.0031042	0.0270892
PARVG	36.8177	0.643123	0.283482	-2.26865	0.0232894	0.123904
TOPORS	36.7329	0.643531	0.307436	-2.09322	0.0363293	0.1691
CKLF	250.176	0.644995	0.184251	-3.50063	0.000464165	0.00578062
ISG15	149.883	0.646321	0.228556	-2.82785	0.00468621	0.0372014
TPD52	26.7587	0.646626	0.317941	-2.03379	0.0419726	0.185747
LBH	109.17	0.646883	0.256238	-2.52454	0.0115849	0.0746429
DDX27	75.955	0.647427	0.233151	-2.77686	0.00548873	0.0423396
MSL2	34.9429	0.647604	0.291102	-2.22467	0.0261037	0.134854
RNF145	47.5192	0.647746	0.273107	-2.37176	0.0177034	0.102649
TOPBP1	30.9382	0.64788	0.303664	-2.13354	0.0328802	0.158268
LINC01578	124.061	0.648943	0.210927	-3.07663	0.00209358	0.0200277
SUPT3H	33.0839	0.650128	0.285596	-2.27639	0.0228228	0.12228
PRXL2C	39.8442	0.651531	0.29775	-2.18818	0.0286564	0.144714
BUB3	141.841	0.652052	0.223322	-2.91978	0.00350276	0.0295469
UBL3	64.085	0.652055	0.243354	-2.67944	0.00737447	0.0527431
RORA	135.694	0.652266	0.211157	-3.08901	0.00200824	0.0193245
MRPL18	79.1889	0.652472	0.304625	-2.14189	0.0322027	0.156205
TDG	47.3451	0.654512	0.25233	-2.59387	0.00949012	0.0643101
SKA2	41.8339	0.656018	0.280665	-2.33737	0.0194199	0.110179
SOCS1	252.276	0.656139	0.19781	-3.31701	0.000909866	0.00999698
EIF1AX	130.516	0.657482	0.211913	-3.1026	0.0019183	0.018645
AKIRIN2	101.088	0.658181	0.206296	-3.19047	0.00142043	0.0145032
STAT3	91.5665	0.659156	0.226607	-2.90881	0.00362813	0.0304351
ARID5A	72.5957	0.65945	0.230247	-2.8641	0.00418202	0.034199
RGS10	191.692	0.660621	0.216556	-3.05058	0.00228403	0.0213874
HERC5	29.7562	0.66266	0.310273	-2.13573	0.0327012	0.157793
TAF1D	180.967	0.662682	0.202532	-3.27199	0.00106794	0.0115154
CDK6	44.5351	0.667264	0.271632	-2.4565	0.0140299	0.0858642
AL499604.1	22.2765	0.668379	0.332342	-2.01112	0.044313	0.193462
TFDP1	33.9238	0.668725	0.305018	-2.19241	0.0283497	0.143404
YIPF6	23.8772	0.67073	0.323526	-2.07319	0.0381549	0.173992
NDUFV2	82.3694	0.671144	0.225236	-2.97973	0.00288502	0.0253957
TMBIM1	32.4604	0.671957	0.292293	-2.29892	0.0215096	0.117106
LPIN1	52.3025	0.672571	0.24402	-2.75622	0.00584742	0.0443307
AC244197.3	27.0108	0.673378	0.312217	-2.15676	0.0310243	0.152235
TRMT112	257.533	0.674227	0.175111	-3.85029	0.000117976	0.0017755
IPCEF1	26.9545	0.674749	0.336628	-2.00443	0.0450235	0.195629
TMEM107	47.0542	0.675479	0.269176	-2.50943	0.0120926	0.0768782
H1FX	367.883	0.677756	0.171632	-3.9489	7.85121e-05	0.00124328
COX8A	224.135	0.678879	0.178199	-3.80967	0.000139151	0.00205341
DDX3Y	71.496	0.681042	0.328417	-2.07371	0.0381062	0.173901
ITK	52.8743	0.681515	0.265467	-2.56723	0.0102514	0.0679505
PRNP	65.0565	0.68172	0.240268	-2.83734	0.00454915	0.0364955
DLGAP1-AS1	29.749	0.683112	0.309702	-2.20571	0.0274045	0.139553
TANK	65.8347	0.685949	0.264253	-2.59581	0.00943691	0.0640211
MTND2P28	24.8986	0.686937	0.344782	-1.99238	0.0463293	0.199423
TTC39C	68.6108	0.687367	0.228785	-3.00442	0.00266087	0.023873
R3HDM2	88.5644	0.687842	0.217129	-3.16789	0.00153547	0.015547
RC3H1	61.7803	0.68801	0.251555	-2.73503	0.00623746	0.0465889
UBAP2	32.1785	0.689606	0.297993	-2.31417	0.0206586	0.114112
PPDPF	661.511	0.693154	0.154758	-4.47895	7.50111e-06	0.000160191
PPP1R16B	21.6469	0.693425	0.339783	-2.04079	0.041272	0.183246
WDR45B	23.9046	0.693973	0.345455	-2.00886	0.0445516	0.194206
ODC1	94.4967	0.694535	0.234925	-2.95641	0.00311245	0.0271222
GLIPR1	131.151	0.695271	0.206711	-3.36349	0.000769641	0.00867634
INPP4B	49.0504	0.697141	0.270301	-2.57912	0.00990512	0.0663074
DDX21	159.519	0.698938	0.190167	-3.67538	0.000237492	0.00326619
GOLGB1	101.092	0.699166	0.207265	-3.3733	0.000742742	0.00842006
STK17A	267.443	0.700359	0.209823	-3.33786	0.000844258	0.00939528
KDM6A	20.1423	0.700477	0.347453	-2.01604	0.0437961	0.191786
DNAJC15	76.2925	0.700935	0.2193	-3.19624	0.00139232	0.0143125
CBX4	49.0125	0.701165	0.266066	-2.6353	0.0084062	0.0585346
HERPUD2	113.747	0.703002	0.200692	-3.50288	0.000460253	0.00574369
PPP4R3A	60.5391	0.706522	0.239349	-2.95185	0.0031588	0.0274079
GATA3	62.2732	0.706796	0.235019	-3.0074	0.00263492	0.0237456
MXRA7	36.5179	0.707807	0.294714	-2.40168	0.0163202	0.0960058
CCSER2	126.667	0.708667	0.20965	-3.38024	0.000724219	0.00825551
SRSF6	30.4584	0.709184	0.312277	-2.27101	0.0231463	0.12325
SLA2	50.453	0.709226	0.265291	-2.67339	0.0075088	0.0533826
MOB4	62.6659	0.709452	0.260003	-2.72864	0.00635969	0.0471534
SUCLG2	24.2349	0.711242	0.319212	-2.22812	0.0258724	0.133989
MTHFS	27.1226	0.711652	0.315587	-2.25501	0.024133	0.127386
NAPA	25.2518	0.711792	0.320037	-2.22409	0.0261422	0.134938
ITM2A	200.163	0.712139	0.218981	-3.25206	0.00114573	0.012064
ANKRD36C	73.2766	0.712669	0.23523	-3.02967	0.0024482	0.0223283
HSPA4	47.2859	0.71321	0.313132	-2.27767	0.0227463	0.121978
HNRNPH1	352.366	0.714518	0.18396	-3.88411	0.000102707	0.00157701
DDX3X	262.571	0.715365	0.206143	-3.47023	0.000520016	0.0063715
SLC3A2	135.058	0.715595	0.210346	-3.402	0.000668955	0.00779936
AC012313.3	32.7244	0.715972	0.285638	-2.50657	0.0121908	0.0773312
TOP1	116.34	0.715974	0.223011	-3.21048	0.00132512	0.0137147
JMJD1C	83.3321	0.717028	0.224212	-3.19799	0.00138388	0.0142742
HSPA9	98.8132	0.722029	0.208626	-3.46087	0.000538424	0.00655731
PGK1	229.852	0.723604	0.194644	-3.71758	0.000201139	0.00283042
RABIF	24.248	0.723811	0.33662	-2.15023	0.0315369	0.153885
ZFP36L2	1765.63	0.724401	0.20257	-3.57605	0.000348819	0.00453016
AGL	26.5849	0.725315	0.306316	-2.36786	0.0178911	0.103418
CISD2	46.8934	0.725751	0.285278	-2.54402	0.0109586	0.0717392
PTPN7	85.1233	0.725816	0.225075	-3.22477	0.00126072	0.0131832
CHD2	104.162	0.72742	0.204875	-3.55055	0.000384422	0.00495015
ATP5ME	280.576	0.728602	0.175934	-4.14135	3.45273e-05	0.000612304
ZCCHC2	25.3364	0.72903	0.320907	-2.27178	0.0231001	0.123221
CDKN2AIP	41.6599	0.729087	0.265143	-2.74979	0.00596336	0.0447621
SEM1	202.386	0.729741	0.206192	-3.53913	0.000401445	0.00511505
CBWD3	37.3916	0.730844	0.291652	-2.50587	0.0122149	0.0773312
LPAR2	26.3391	0.730892	0.319183	-2.28989	0.0220279	0.119179
GNG5	149.338	0.730922	0.206229	-3.54423	0.000393766	0.00503838
RNF11	22.4206	0.730963	0.348946	-2.09477	0.0361914	0.168717
CAPZA1	147.829	0.731184	0.198117	-3.69067	0.000223668	0.00310422
CASK	44.058	0.731328	0.285781	-2.55905	0.0104959	0.0691928
ADARB1	21.2625	0.732403	0.351979	-2.08081	0.037451	0.172206
PGRMC1	26.9732	0.732473	0.315053	-2.32492	0.0200762	0.112639
CYTIP	408.03	0.73299	0.172705	-4.24417	2.19401e-05	0.000409436
TIFA	22.5403	0.734026	0.346061	-2.12109	0.0339143	0.161418
HAUS3	25.7398	0.735126	0.31852	-2.30794	0.0210024	0.115275
ATG101	36.3325	0.735889	0.276019	-2.66608	0.00767423	0.0543106
SLC35D2	20.9078	0.735912	0.344746	-2.13465	0.0327896	0.158083
UGP2	122.188	0.736319	0.208312	-3.5347	0.00040824	0.00517986
ACSL3	31.33	0.737606	0.295692	-2.49451	0.0126132	0.0791918
AKIRIN1	108.595	0.73905	0.234429	-3.15256	0.00161847	0.0162249
MECP2	66.6957	0.739162	0.243623	-3.03404	0.00241301	0.0221139
AL135925.1	19.8684	0.740499	0.356977	-2.07436	0.0380455	0.173799
UBE2Q2P1	17.3809	0.741065	0.368309	-2.01207	0.044212	0.193189
DNAJB9	37.5042	0.74301	0.306961	-2.42053	0.0154977	0.0927124
DYNLT3	33.2908	0.74365	0.289138	-2.57196	0.0101125	0.0674726
ARAP2	91.3309	0.743807	0.227473	-3.26987	0.00107595	0.0115294
PNPLA8	35.4245	0.745232	0.293537	-2.5388	0.0111233	0.0724627
ARPP19	76.0323	0.7454	0.220223	-3.38475	0.000712427	0.00815259
DOCK10	55.1197	0.74541	0.245186	-3.04018	0.00236436	0.0218772
ST3GAL5	31.7263	0.746691	0.306564	-2.43568	0.0148639	0.089701
ARIH2OS	20.9976	0.746957	0.368127	-2.02908	0.0424506	0.187382
TRIM22	79.8642	0.74945	0.242572	-3.0896	0.00200427	0.0193245
FAM53C	20.3311	0.749657	0.358958	-2.08842	0.0367598	0.170421
TNFRSF1B	131.637	0.750894	0.223161	-3.36481	0.000765972	0.00865106
IL4R	20.5614	0.752023	0.354854	-2.11925	0.0340694	0.161418
UBE2B	189.754	0.752885	0.206584	-3.64445	0.00026796	0.00366031
STAU1	66.0727	0.753764	0.247146	-3.04987	0.00228939	0.0213874
ELMSAN1	37.9614	0.754038	0.327386	-2.30321	0.021267	0.116307
SLC1A5	48.2048	0.755627	0.252003	-2.99848	0.00271327	0.0242714
SUCO	34.3851	0.756453	0.29967	-2.52429	0.0115933	0.0746429
SMARCA5	124.439	0.75797	0.203528	-3.72415	0.000195971	0.00277054
BCL11B	234.299	0.759988	0.19982	-3.80336	0.000142745	0.00209624
RBM34	32.4622	0.760632	0.310416	-2.45036	0.0142714	0.087166
STAT4	62.1675	0.761408	0.244015	-3.12033	0.00180646	0.0176713
RALA	40.1966	0.762358	0.281142	-2.71165	0.00669502	0.0489936
NDUFA3	225.705	0.763371	0.200217	-3.81271	0.000137449	0.00203325
RAB21	74.8542	0.767188	0.231482	-3.31424	0.000918924	0.0100783
LUC7L	34.3146	0.767453	0.28302	-2.71165	0.00669491	0.0489936
BORCS5	43.252	0.767497	0.280317	-2.73796	0.00618215	0.0462327
NOP10	142.488	0.767742	0.224853	-3.41442	0.00063919	0.00755689
PTGES3	327.306	0.768122	0.177019	-4.33922	1.42991e-05	0.000283754
C21orf91	24.2932	0.769314	0.341109	-2.25533	0.0241127	0.127386
AAMDC	18.6264	0.77096	0.36378	-2.1193	0.0340648	0.161418
CD69	804.304	0.772016	0.264207	-2.92201	0.00347775	0.0294178
SCLT1	29.3931	0.772953	0.309325	-2.49884	0.0124601	0.0785547
BIRC2	40.976	0.773172	0.265676	-2.9102	0.00361192	0.0303832
AFF4	50.6896	0.776383	0.26013	-2.98459	0.00283956	0.0250683
ARL4A	95.6795	0.77663	0.253163	-3.0677	0.00215711	0.020474
MAP4	42.631	0.776949	0.259465	-2.99443	0.00274959	0.0244713
PET100	177.134	0.778532	0.187072	-4.16167	3.15926e-05	0.000568573
RPS27L	215.273	0.77885	0.182076	-4.2776	1.88917e-05	0.00036374
R3HDM1	25.123	0.779953	0.324254	-2.40538	0.0161558	0.0954592
YWHAG	24.9179	0.77998	0.319988	-2.43753	0.0147881	0.0893323
CYCS	283.992	0.780479	0.214788	-3.63372	0.000279367	0.00379901
IL32	1300.03	0.781113	0.159771	-4.88896	1.01371e-06	2.6387e-05
TENT5A	15.207	0.782053	0.388911	-2.01088	0.0443383	0.193462
SOD1	392.605	0.782634	0.215308	-3.63495	0.00027803	0.00378934
INTS6	45.0994	0.782954	0.288884	-2.71027	0.00672279	0.0490659
PSTPIP2	27.3745	0.784153	0.33944	-2.31014	0.0208805	0.114815
CLEC2B	307.675	0.785439	0.186734	-4.20619	2.59712e-05	0.000475877
DNTTIP2	105.01	0.785465	0.227471	-3.45304	0.000554316	0.00672386
SIRPG	29.878	0.785638	0.30555	-2.57123	0.0101339	0.0675405
ZC3HAV1	152.29	0.785847	0.193837	-4.05416	5.03143e-05	0.000842973
GNA13	44.2903	0.788288	0.259823	-3.03395	0.00241375	0.0221139
NDRG1	32.0527	0.788748	0.294308	-2.68001	0.00736209	0.0527167
CD58	31.2196	0.789637	0.294392	-2.68226	0.00731265	0.0524866
ARRDC3	56.0169	0.790136	0.28169	-2.80498	0.005032	0.0395077
ISG20L2	47.7338	0.790687	0.31353	-2.52188	0.0116728	0.0748965
NUP98	20.1283	0.790698	0.344132	-2.29766	0.0215812	0.11739
SQSTM1	108.99	0.790855	0.259315	-3.04979	0.00229004	0.0213874
PPP2R2A	53.1656	0.791638	0.270246	-2.92933	0.00339695	0.0289022
ASXL1	46.0304	0.791931	0.303676	-2.60782	0.00911219	0.062306
SPNS3	37.8913	0.796096	0.292293	-2.72363	0.00645692	0.0475258
CDK17	36.5905	0.79686	0.282205	-2.82369	0.00474736	0.0376376
SLC20A1	51.7603	0.799232	0.251487	-3.17802	0.00148283	0.0150643
AC246785.3	17.789	0.799237	0.389818	-2.05028	0.0403369	0.18015
A1BG	35.4815	0.80294	0.276326	-2.90577	0.00366353	0.0306473
NASP	128.349	0.805158	0.222968	-3.61109	0.000304912	0.00406438
ZNF699	20.9998	0.805279	0.345867	-2.32829	0.0198966	0.111942
STIP1	48.7506	0.808374	0.289427	-2.79301	0.00522198	0.0405523
EIF5	181.687	0.808841	0.218415	-3.70323	0.000212871	0.0029748
SETD2	68.0935	0.810508	0.230752	-3.51246	0.000443974	0.00558096
SIK3	42.6315	0.810623	0.267466	-3.03075	0.00243949	0.0222824
CPEB4	28.2543	0.812491	0.326513	-2.48838	0.0128325	0.0801538
IRF2BPL	40.5351	0.813475	0.272898	-2.98088	0.00287421	0.0253374
CMTM7	22.2469	0.813826	0.33245	-2.44796	0.0143666	0.0875714
SRRT	46.7621	0.814632	0.266047	-3.06199	0.00219874	0.0207637
BLOC1S6	26.3149	0.814784	0.307292	-2.6515	0.00801347	0.0562823
MORF4L2	45.9737	0.816418	0.277752	-2.93938	0.0032887	0.028252
CEBPB	227.996	0.818705	0.202648	-4.04003	5.34439e-05	0.000880808
ARL6IP1	125.939	0.819196	0.222753	-3.67759	0.000235446	0.0032528
PNRC1	712.723	0.819303	0.159537	-5.1355	2.81391e-07	8.12683e-06
AC092338.1	25.462	0.821127	0.318271	-2.57996	0.00988111	0.0662198
PNP	40.2765	0.82221	0.270649	-3.03792	0.00238214	0.021957
TENT4B	17.7184	0.824676	0.367393	-2.24467	0.0247892	0.130058
COPB1	66.3046	0.827053	0.240483	-3.43913	0.00058359	0.0070288
PAG1	40.5388	0.828535	0.292784	-2.82985	0.00465694	0.0370661
TLK1	79.4655	0.829639	0.229983	-3.60739	0.000309288	0.00409884
ARRDC2	39.5401	0.829969	0.283469	-2.9279	0.00341261	0.0289476
JAKMIP1	16.1956	0.830158	0.379834	-2.18558	0.0288462	0.145068
GCHFR	85.1565	0.833774	0.242332	-3.44063	0.000580357	0.00701168
SLC25A24	29.2509	0.833824	0.301045	-2.76976	0.00560971	0.04285
LAG3	75.4562	0.834667	0.255443	-3.26753	0.0010849	0.0115843
GLS	127.739	0.837375	0.200369	-4.17916	2.92593e-05	0.000531311
GRPEL1	50.9433	0.838948	0.260027	-3.22638	0.00125366	0.0131321
TUT4	65.3693	0.839633	0.248825	-3.3744	0.000739774	0.00840212
NDUFB1	180.63	0.839832	0.201706	-4.16363	3.13221e-05	0.000565382
RILPL2	88.3219	0.841159	0.334453	-2.51503	0.0119022	0.075747
WTAP	93.6831	0.841543	0.209435	-4.01817	5.86529e-05	0.000958841
BTAF1	30.3616	0.842059	0.294152	-2.86267	0.00420087	0.034199
SGTB	26.109	0.842713	0.345704	-2.43767	0.0147823	0.0893323
TRAPPC2B	15.4355	0.842833	0.384559	-2.19168	0.0284023	0.14355
Z99127.4	35.3957	0.845602	0.298738	-2.83058	0.00464639	0.0370307
ROMO1	142.612	0.846035	0.194535	-4.34901	1.36754e-05	0.000273733
DDB2	26.067	0.846728	0.312115	-2.71287	0.00667032	0.0489776
SMCHD1	248.225	0.847986	0.197118	-4.30192	1.69322e-05	0.00033127
MSH3	27.8151	0.848015	0.304917	-2.78113	0.00541696	0.0418521
RASA2	101.29	0.848565	0.211874	-4.00505	6.20033e-05	0.00100818
AZIN1	34.8758	0.849226	0.294636	-2.88229	0.00394798	0.0325776
RSRC2	158.396	0.853641	0.193808	-4.40457	1.05996e-05	0.000217921
DHRS3	28.1522	0.853916	0.304952	-2.80017	0.00510759	0.039971
TMEM14C	70.0173	0.855242	0.239151	-3.57615	0.000348688	0.00453016
PIM3	69.6987	0.855565	0.272815	-3.13607	0.0017123	0.0169968
AGO2	52.4547	0.857302	0.251401	-3.4101	0.000649401	0.00764048
SARAF	782.183	0.862187	0.174128	-4.95146	7.36597e-07	1.97675e-05
TSPYL4	27.7457	0.863422	0.31629	-2.72984	0.0063365	0.0470967
GOLT1B	21.9911	0.864207	0.348293	-2.48127	0.0130916	0.0813531
HSPA5	353.804	0.865694	0.176046	-4.91742	8.76911e-07	2.32247e-05
NXT1	68.9716	0.867904	0.244763	-3.5459	0.000391273	0.00501706
LUZP1	49.1319	0.868663	0.285597	-3.04157	0.0023535	0.0218257
YWHAE	70.8482	0.869248	0.237035	-3.66718	0.000245244	0.00335757
BCL2A1	35.3653	0.870468	0.320663	-2.71458	0.00663589	0.0487838
FAM45A	22.7984	0.871094	0.335904	-2.59328	0.00950649	0.0643492
KIAA1191	19.2466	0.8727	0.356473	-2.44815	0.0143591	0.0875714
CCDC47	39.4226	0.873065	0.279559	-3.123	0.00179016	0.0175684
SEC14L1	47.7475	0.873535	0.255347	-3.42098	0.000623963	0.00742027
RHBDD2	22.2016	0.873536	0.337258	-2.59011	0.00959444	0.0647999
GLUL	93.3467	0.874529	0.229875	-3.80437	0.000142166	0.00209281
GPCPD1	44.8003	0.874706	0.267394	-3.27122	0.00107084	0.0115154
BAZ1A	130.788	0.8783	0.212593	-4.13137	3.60605e-05	0.000635776
ZMYM2	40.811	0.878786	0.288595	-3.04505	0.00232645	0.0216742
GDF11	15.3502	0.884448	0.382836	-2.31025	0.0208743	0.114815
AL590764.2	21.9964	0.884786	0.339094	-2.60926	0.00907379	0.0621837
MLLT3	27.454	0.885748	0.32394	-2.7343	0.00625139	0.0466071
CFAP20	28.0699	0.887883	0.302278	-2.93731	0.00331078	0.0283614
AHSA1	91.4846	0.888191	0.248065	-3.58048	0.000342962	0.00447325
TBCD	26.069	0.889293	0.337022	-2.63868	0.00832295	0.0580883
GLCCI1	24.0781	0.890241	0.322558	-2.75994	0.00578124	0.0439389
MIDN	102.177	0.890264	0.248096	-3.58839	0.000332723	0.00436789
MAP3K2	79.8481	0.891339	0.245725	-3.62738	0.000286313	0.00387485
ZBTB10	21.181	0.891977	0.384216	-2.32155	0.0202572	0.113092
PAF1	23.485	0.892219	0.341578	-2.61205	0.00900001	0.0618878
SMC4	39.8297	0.89497	0.338374	-2.64491	0.00817121	0.0571608
ISCA1	96.7185	0.897278	0.227626	-3.94189	8.08418e-05	0.00127352
NOP58	86.9919	0.897883	0.218755	-4.10451	4.05169e-05	0.000694167
CAMK2N1	32.1357	0.899074	0.292599	-3.07272	0.00212118	0.0201962
AL121933.1	21.4107	0.901804	0.346215	-2.60475	0.00919403	0.0627242
LINC00623	35.4872	0.902884	0.293604	-3.07517	0.00210381	0.0200623
TBC1D2B	30.5046	0.903965	0.308174	-2.9333	0.00335385	0.0286898
MIR4435-2HG	27.5456	0.904008	0.323913	-2.7909	0.00525616	0.0407134
DENND1B	23.4156	0.905016	0.331788	-2.72769	0.00637796	0.0471736
KAT2B	28.3125	0.90551	0.305066	-2.96824	0.00299506	0.0262881
NSMCE3	81.5283	0.906636	0.220384	-4.11388	3.89057e-05	0.00067226
TRA2B	195.139	0.906706	0.190371	-4.76285	1.9088e-06	4.6681e-05
IRF2BP2	76.8946	0.906982	0.257041	-3.52855	0.000417838	0.00529058
RNF125	49.6232	0.909313	0.284651	-3.19449	0.0014008	0.0143269
PHYH	21.6605	0.911683	0.355698	-2.56308	0.0103747	0.0686179
SENP7	45.471	0.913541	0.279969	-3.263	0.00110238	0.0117298
MT1E	41.1855	0.916914	0.392598	-2.3355	0.0195171	0.110524
RNF149	48.998	0.917472	0.262182	-3.49936	0.000466369	0.00579617
SERPINB9	84.2029	0.918815	0.245075	-3.74912	0.000177454	0.00253237
SLC25A4	27.6566	0.919383	0.3073	-2.99181	0.00277332	0.0245909
SLA	172.162	0.919516	0.216457	-4.24803	2.15659e-05	0.000404944
TOX	26.2944	0.919574	0.324651	-2.8325	0.00461848	0.0369053
CRYBG1	140.572	0.920223	0.196637	-4.6798	2.87152e-06	6.72424e-05
USP12	32.6916	0.920358	0.310968	-2.95965	0.00307987	0.0269156
NUP58	16.3042	0.921227	0.387123	-2.37967	0.0173281	0.100813
HIST1H1E	35.8759	0.923849	0.306553	-3.01367	0.0025811	0.0232952
ATXN1	53.5706	0.926061	0.26978	-3.43265	0.00059771	0.00716425
SLF1	36.945	0.932786	0.305839	-3.04992	0.00228903	0.0213874
GGCX	18.1373	0.934687	0.357352	-2.61559	0.00890729	0.0615293
SLC35E1	11.9618	0.935542	0.431477	-2.16823	0.0301409	0.14948
GTF2B	69.353	0.93784	0.236178	-3.97091	7.15996e-05	0.00113977
RGPD6	10.4861	0.938939	0.461227	-2.03574	0.0417765	0.185215
TRIM39-RPP21	31.8326	0.943383	0.289319	-3.2607	0.00111139	0.0117842
TAF13	20.9424	0.94463	0.349089	-2.70599	0.00681014	0.0495246
PIK3R1	429.539	0.944657	0.230976	-4.08985	4.31651e-05	0.000735383
UBALD2	179.726	0.944843	0.181895	-5.19445	2.05331e-07	6.07478e-06
HNRNPLL	26.4732	0.947225	0.32707	-2.89609	0.00377838	0.0313916
LIMA1	31.9432	0.949597	0.389549	-2.43768	0.0147818	0.0893323
MRPL1	56.5384	0.952028	0.251529	-3.78496	0.000153731	0.00223835
MT-ATP8	131.253	0.952904	0.218435	-4.36242	1.2863e-05	0.000260046
IDI1	142.637	0.952931	0.223587	-4.26201	2.02596e-05	0.000385187
SMURF2	37.6095	0.954166	0.289835	-3.2921	0.000994406	0.0108278
CAMK4	27.4046	0.955996	0.335879	-2.84625	0.00442375	0.0357734
RBM38	128.304	0.959623	0.241657	-3.97102	7.1566e-05	0.00113977
DUSP2	927.471	0.9607	0.266688	-3.60233	0.000315374	0.00415813
PCNA	37.2319	0.962905	0.299472	-3.21534	0.00130288	0.013554
TOB2	28.7803	0.964479	0.318635	-3.0269	0.00247072	0.0224661
AL357060.1	20.071	0.966239	0.353404	-2.73409	0.00625527	0.0466071
HELB	29.5809	0.969518	0.308117	-3.1466	0.00165183	0.016532
PPP1R10	155.724	0.973507	0.197882	-4.91963	8.67071e-07	2.30649e-05
APOLD1	22.9538	0.97619	0.345854	-2.82255	0.00476436	0.037723
TUBA1C	41.0783	0.980625	0.266759	-3.67607	0.000236856	0.00326485
SRSF7	618.308	0.985577	0.211287	-4.66464	3.09156e-06	7.18403e-05
HSPA8	764.043	0.985813	0.179686	-5.48632	4.10399e-08	1.33105e-06
TNFAIP3	502.5	0.99114	0.490254	-2.02169	0.0432085	0.189898
NFIL3	37.0551	0.994978	0.285633	-3.48342	0.000495055	0.00609028
UGCG	27.5665	0.998795	0.314465	-3.17617	0.00149233	0.0151355
RRN3P1	21.9766	0.998824	0.338629	-2.94961	0.00318173	0.0275281
FAM102A	40.4186	1.00007	0.265985	-3.75988	0.000169993	0.00244314
PPP1R2	200.234	1.00279	0.209999	-4.77522	1.79507e-06	4.40772e-05
TYMP	51.5178	1.0079	0.249336	-4.04235	5.29188e-05	0.00087692
TSEN34	14.4808	1.00813	0.412011	-2.44685	0.014411	0.0877538
SFPQ	246.813	1.00898	0.191692	-5.26355	1.41301e-07	4.32825e-06
SPAG9	59.8912	1.00915	0.244854	-4.12145	3.76489e-05	0.000654271
AC023509.1	17.9	1.01079	0.418178	-2.41712	0.0156439	0.0932025
CD5	43.9065	1.01332	0.322106	-3.14593	0.00165562	0.0165425
RIT1	29.5432	1.01386	0.298517	-3.39631	0.000683021	0.00792069
UAP1	36.9493	1.0153	0.289272	-3.50983	0.000448389	0.00561525
SLC6A6	19.3057	1.01567	0.372196	-2.72887	0.0063552	0.0471534
MXI1	40.466	1.01568	0.26792	-3.79097	0.000150059	0.00219303
CASP3	32.8681	1.01841	0.31871	-3.19542	0.00139628	0.0143269
BRD2	143.699	1.02199	0.219966	-4.64611	3.3826e-06	7.80057e-05
CITED2	161.912	1.02472	0.23192	-4.41844	9.94138e-06	0.000207197
PTMS	84.9203	1.02767	0.23294	-4.41173	1.02549e-05	0.000212999
MDFIC	112.626	1.0295	0.210869	-4.8822	1.04906e-06	2.70747e-05
TRA2A	148.597	1.03366	0.190157	-5.43584	5.45387e-08	1.75014e-06
AC091271.1	28.4148	1.03618	0.314047	-3.29944	0.000968784	0.0105678
HIST3H2A	50.1345	1.0386	0.267792	-3.87838	0.000105153	0.00161049
SOS1	43.5808	1.04039	0.268444	-3.87563	0.000106348	0.00162468
MT1X	74.6659	1.04485	0.27776	-3.7617	0.000168759	0.00243117
ARIH1	55.026	1.04573	0.253344	-4.1277	3.66417e-05	0.000638598
JARID2	56.2182	1.04627	0.241133	-4.33895	1.43164e-05	0.000283754
RB1	22.0889	1.04893	0.335295	-3.12838	0.00175774	0.0173345
ZFYVE28	22.0592	1.05299	0.340221	-3.09502	0.00196802	0.0190368
CEBPZ	112.566	1.05304	0.218178	-4.82652	1.38939e-06	3.49654e-05
POLR2A	64.6492	1.05725	0.248844	-4.24863	2.15077e-05	0.000404944
KMT2E-AS1	26.9	1.05952	0.338808	-3.12721	0.00176474	0.0173753
HSPA13	21.0904	1.06129	0.34868	-3.04374	0.0023366	0.0217354
RNF138	34.2737	1.06375	0.310768	-3.42298	0.000619388	0.00738033
ZBTB1	88.6066	1.06466	0.24961	-4.26529	1.99645e-05	0.00038077
NPIPB5	11.6252	1.06624	0.465745	-2.28933	0.0220602	0.119247
OAT	32.9075	1.06843	0.318695	-3.35252	0.000800785	0.008994
DNAJB6	116.946	1.06872	0.264285	-4.04381	5.25892e-05	0.000873846
ARL6IP6	35.4913	1.06891	0.295393	-3.61859	0.000296208	0.00397456
MYADM	89.1542	1.07084	0.32922	-3.25264	0.00114337	0.0120601
MAP1LC3B	234.864	1.07321	0.178836	-6.0011	1.95989e-09	7.97767e-08
ARHGEF7	19.7665	1.07432	0.354056	-3.03432	0.00241078	0.0221139
NAA50	58.601	1.07515	0.273968	-3.92438	8.69523e-05	0.0013627
B3GNT2	42.5592	1.07642	0.284758	-3.78012	0.000156751	0.00227439
CALM2	196.183	1.07773	0.238028	-4.52774	5.96184e-06	0.0001296
GPBP1	247.761	1.07804	0.188455	-5.72038	1.06286e-08	3.70474e-07
ELF1	258.65	1.07994	0.183402	-5.8884	3.89958e-09	1.469e-07
MED29	37.2499	1.08256	0.282656	-3.82998	0.000128156	0.00191445
H2AFJ	104.789	1.08867	0.215791	-5.04501	4.53505e-07	1.25959e-05
SRSF2	245.039	1.09542	0.243154	-4.50505	6.6356e-06	0.000143732
YES1	22.4474	1.09893	0.354788	-3.09741	0.00195218	0.0189439
ATAD2	26.6386	1.10308	0.336241	-3.28063	0.00103576	0.0112377
G3BP2	164.505	1.10474	0.186272	-5.93079	3.01479e-09	1.17966e-07
BRD1	100.798	1.10828	0.228221	-4.85616	1.19684e-06	3.03717e-05
AC027290.2	55.3516	1.11161	0.281611	-3.94733	7.90289e-05	0.0012482
AC025164.1	44.8032	1.1183	0.262495	-4.26027	2.0418e-05	0.000386985
RPP21	40.9156	1.1187	0.273169	-4.09524	4.21723e-05	0.000720494
MAP3K8	83.7779	1.11912	0.301494	-3.71191	0.0002057	0.0028879
PPP1CB	103.353	1.12215	0.203911	-5.50314	3.7308e-08	1.21652e-06
HMGB2	326.288	1.12216	0.235699	-4.76098	1.92658e-06	4.69265e-05
CLK1	114.985	1.12218	0.238761	-4.70002	2.60131e-06	6.23594e-05
ASXL2	37.7815	1.12386	0.282463	-3.9788	6.9265e-05	0.0011143
ZFP36	649.043	1.12738	0.543509	-2.07426	0.0380553	0.173799
GGA2	24.0302	1.13047	0.319154	-3.5421	0.000396961	0.00506856
RAB8B	93.9787	1.13056	0.262908	-4.30021	1.70636e-05	0.000332767
AC114760.2	81.6202	1.13293	0.230829	-4.90808	9.19729e-07	2.42529e-05
VMP1	99.0247	1.13576	0.219512	-5.17405	2.29073e-07	6.74431e-06
ARHGAP18	40.2765	1.13636	0.270128	-4.20673	2.59092e-05	0.000475877
HOXB2	18.8291	1.13777	0.371593	-3.06188	0.00219951	0.0207637
SRGAP2C	32.299	1.13929	0.30929	-3.68356	0.000229998	0.00318478
DDX24	235.344	1.14035	0.190102	-5.9986	1.99029e-09	8.0474e-08
GCH1	31.5235	1.14091	0.298637	-3.82039	0.000133239	0.00198063
RAB11FIP1	71.0762	1.14264	0.243551	-4.69157	2.71122e-06	6.47384e-05
OXNAD1	145.11	1.14466	0.200017	-5.72281	1.04779e-08	3.67331e-07
RYBP	27.7453	1.14504	0.305842	-3.74387	0.000181204	0.00256776
PBX4	23.4129	1.1452	0.338201	-3.38614	0.000708826	0.00812671
PHTF2	33.2275	1.1455	0.3331	-3.4389	0.000584091	0.0070288
BCL2L11	40.4415	1.15187	0.327054	-3.52196	0.000428365	0.00540131
JOSD1	60.9702	1.15384	0.24823	-4.64829	3.34699e-06	7.74791e-05
YTHDF3	21.6776	1.15803	0.34793	-3.32835	0.000873636	0.00965137
AC058791.1	214.14	1.15891	0.192892	-6.00806	1.87757e-09	7.69424e-08
SMG1P1	17.5579	1.15903	0.385666	-3.00528	0.0026534	0.0238413
CHD1	135.658	1.15958	0.206621	-5.6121	1.99882e-08	6.69769e-07
PDE7A	58.4447	1.16134	0.237283	-4.89431	9.86523e-07	2.59016e-05
PLEKHA2	46.8617	1.16429	0.275617	-4.2243	2.39687e-05	0.000441854
AUTS2	37.6734	1.16485	0.291567	-3.99514	6.46561e-05	0.0010485
RGPD5	19.1402	1.16676	0.358181	-3.25746	0.00112414	0.0118779
SLBP	89.4421	1.16795	0.252417	-4.62706	3.70885e-06	8.45645e-05
DCTN6	41.8162	1.16874	0.275055	-4.2491	2.14631e-05	0.000404944
SOD2	48.3349	1.17412	0.284431	-4.12798	3.65963e-05	0.000638598
FKBP4	28.576	1.17558	0.398521	-2.94986	0.00317922	0.0275281
EPSTI1	39.346	1.17722	0.313152	-3.75926	0.000170417	0.00244344
IRF7	34.0224	1.18105	0.305094	-3.87112	0.000108338	0.0016468
UBE2A	46.8542	1.18282	0.300756	-3.93282	8.39561e-05	0.00131915
CCND2	81.4583	1.18608	0.213816	-5.54718	2.90307e-08	9.62137e-07
NUDT4	56.6875	1.18861	0.244979	-4.85189	1.22289e-06	3.09033e-05
BCL2	145.733	1.18922	0.237516	-5.00689	5.53158e-07	1.50444e-05
AL118516.1	66.82	1.19441	0.287707	-4.15147	3.30343e-05	0.000591011
ARF4	71.5629	1.19513	0.234296	-5.10093	3.37997e-07	9.57921e-06
JMY	53.8329	1.19618	0.276342	-4.32863	1.50042e-05	0.000296418
TLE4	115.939	1.20018	0.203758	-5.89025	3.85622e-09	1.46175e-07
DPP4	32.2536	1.20155	0.380244	-3.15996	0.0015779	0.0158969
CMC2	41.1219	1.20798	0.27775	-4.34918	1.36647e-05	0.000273733
AC087239.1	32.0417	1.21569	0.338679	-3.58951	0.0003313	0.00435865
AC010733.2	17.3728	1.217	0.382417	-3.18239	0.00146063	0.0148886
CD40LG	49.787	1.2173	0.337517	-3.60663	0.000310201	0.00409884
DYNLL1	273.887	1.22226	0.250778	-4.87385	1.09447e-06	2.80082e-05
IFNGR1	103.792	1.22329	0.24396	-5.01429	5.32305e-07	1.46083e-05
NUDT4B	11.6928	1.22489	0.446672	-2.74225	0.00610195	0.0456893
SIAH2	76.3706	1.22577	0.226938	-5.40135	6.61418e-08	2.0785e-06
H2AFZ	371.95	1.22608	0.217539	-5.63617	1.73874e-08	5.89132e-07
BLVRB	32.1148	1.22661	0.29601	-4.1438	3.416e-05	0.000609355
IVNS1ABP	59.7138	1.22734	0.244195	-5.02607	5.00637e-07	1.38016e-05
DBF4	48.011	1.23059	0.265583	-4.63354	3.59466e-06	8.22701e-05
MT1L	33.3197	1.2334	0.362532	-3.40218	0.000668512	0.00779936
MID1IP1	23.229	1.23586	0.340419	-3.63041	0.000282969	0.0038394
ALG13	39.1461	1.23785	0.27174	-4.55526	5.23199e-06	0.00011581
SNORD3A	17.8152	1.23845	0.478427	-2.58859	0.00963689	0.0650142
TNFSF14	49.024	1.2386	0.276981	-4.4718	7.75649e-06	0.000165064
EIF4EBP1	24.0987	1.24501	0.343943	-3.61981	0.000294822	0.00397354
SUSD3	27.4449	1.24692	0.352542	-3.53693	0.0004048	0.00514698
HERPUD1	329.37	1.24705	0.200825	-6.20963	5.31079e-10	2.36838e-08
GFPT1	26.7544	1.25273	0.314418	-3.98428	6.7684e-05	0.00109468
SH2D1A	34.8565	1.25429	0.334979	-3.7444	0.000180828	0.00256776
HIF1A	35.4278	1.25472	0.303402	-4.13552	3.5415e-05	0.000626216
SYTL3	184.071	1.25621	0.198928	-6.31487	2.70386e-10	1.26146e-08
HNRNPAB	126.466	1.25661	0.2001	-6.2799	3.38784e-10	1.55661e-08
TPM4	130.023	1.2698	0.208339	-6.09489	1.09514e-09	4.61253e-08
AC129492.1	51.2087	1.27034	0.328104	-3.87177	0.000108047	0.0016465
MAT2A	70.8405	1.27217	0.250787	-5.07273	3.92155e-07	1.10624e-05
RLF	35.9083	1.27477	0.295476	-4.3143	1.60107e-05	0.000315276
NR3C1	79.1086	1.275	0.224644	-5.67567	1.38149e-08	4.73374e-07
NANS	35.7244	1.27833	0.328366	-3.89299	9.90159e-05	0.00153589
ETF1	48.6535	1.28118	0.279476	-4.58424	4.55636e-06	0.000102349
EML4	158.189	1.28925	0.18332	-7.03277	2.02469e-12	1.37975e-10
CD96	88.4541	1.29114	0.21326	-6.05432	1.41014e-09	5.89826e-08
ERO1B	52.7729	1.29949	0.264076	-4.9209	8.61452e-07	2.30163e-05
AC026979.2	76.8795	1.30002	0.253425	-5.1298	2.90055e-07	8.33735e-06
GLA	25.3695	1.30555	0.443045	-2.94676	0.0032112	0.0276647
CRTAM	67.5361	1.30793	0.323684	-4.04075	5.32812e-05	0.00088052
PLEKHO1	61.2927	1.30956	0.245969	-5.32411	1.01449e-07	3.13923e-06
NFKB1	68.3112	1.31025	0.271924	-4.81844	1.44684e-06	3.6121e-05
EZR	225.055	1.31144	0.210673	-6.22498	4.81615e-10	2.17985e-08
CXCR3	32.2157	1.31233	0.31422	-4.17648	2.9606e-05	0.000536001
SMG1P4	9.67485	1.31331	0.488008	-2.69117	0.00712016	0.0514093
CYTOR	61.9393	1.31499	0.330776	-3.97548	7.02362e-05	0.00112396
GSPT1	116.208	1.31547	0.227068	-5.7933	6.90155e-09	2.46067e-07
AC134669.1	23.5608	1.3168	0.355477	-3.70431	0.000211967	0.00296901
SNHG15	95.52	1.31854	0.229136	-5.7544	8.69523e-09	3.06608e-07
TOB1	216.425	1.32101	0.276299	-4.78109	1.74347e-06	4.29842e-05
GNG2	28.0597	1.32222	0.333391	-3.96597	7.30973e-05	0.00116056
CISH	24.0946	1.32227	0.37928	-3.48625	0.000489843	0.00603841
LDHA	450.923	1.32245	0.190065	-6.95789	3.45415e-12	2.22866e-10
CHMP1B	58.24	1.3335	0.284761	-4.68289	2.82858e-06	6.65242e-05
ABHD5	20.5989	1.33881	0.389908	-3.43365	0.000595502	0.00715192
PLP2	144.505	1.3407	0.226122	-5.92912	3.04557e-09	1.18406e-07
CSKMT	36.2041	1.35059	0.310326	-4.35217	1.34794e-05	0.000271603
ZFAND5	95.2451	1.35081	0.218391	-6.18531	6.19793e-10	2.72395e-08
NFKBIZ	86.6278	1.35591	0.302061	-4.48886	7.16069e-06	0.000154006
CNOT6L	256.564	1.36016	0.215518	-6.31115	2.76975e-10	1.28233e-08
CBFB	50.0565	1.36106	0.268835	-5.0628	4.13143e-07	1.16005e-05
SELENOK	348.066	1.36605	0.24443	-5.5887	2.28774e-08	7.62372e-07
AMD1	116.562	1.36699	0.230991	-5.91796	3.25954e-09	1.25918e-07
XCL2	372.091	1.36938	0.213633	-6.40996	1.45562e-10	7.06267e-09
RHOH	164.857	1.37044	0.207998	-6.58871	4.43664e-11	2.33985e-09
NCF1B	22.7114	1.3712	0.35015	-3.91604	9.00161e-05	0.00140708
CGAS	24.3478	1.37852	0.353736	-3.89704	9.73766e-05	0.00151433
NUFIP2	92.1926	1.38201	0.218575	-6.3228	2.56859e-10	1.20764e-08
SLAMF1	23.9762	1.39467	0.385766	-3.61533	0.000299962	0.00400721
SMG1P3	21.3085	1.39619	0.40526	-3.44518	0.000570688	0.00690863
HIST1H1C	64.0428	1.40019	0.294276	-4.75809	1.9543e-06	4.74112e-05
ENSG00000288632	7.92439	1.40837	0.540022	-2.60799	0.00910756	0.062306
AHI1	38.0944	1.41924	0.321755	-4.41093	1.02926e-05	0.000213053
PLIN2	93.612	1.42266	0.26251	-5.41946	5.97809e-08	1.90827e-06
TUBA4A	418.367	1.42371	0.241149	-5.90384	3.55126e-09	1.35462e-07
CDKN1B	120.671	1.42965	0.199757	-7.15691	8.2518e-13	5.81944e-11
CD82	25.5596	1.45686	0.339574	-4.29027	1.7846e-05	0.000345802
SOCS4	26.2518	1.46787	0.32674	-4.49247	7.04033e-06	0.000151956
SNHG12	98.5551	1.47207	0.211638	-6.95558	3.51118e-12	2.24161e-10
TGIF1	50.8658	1.47313	0.315432	-4.67019	3.00916e-06	7.01944e-05
GABARAPL1	148.23	1.47475	0.219805	-6.70935	1.95491e-11	1.06816e-09
JPT1	187.296	1.47776	0.273414	-5.40485	6.48642e-08	2.04897e-06
LINC-PINT	63.0261	1.48019	0.248343	-5.96029	2.51796e-09	1.0047e-07
PERP	35.0788	1.48857	0.324815	-4.58283	4.5872e-06	0.000102616
RBPJ	88.2543	1.49301	0.219032	-6.81641	9.33408e-12	5.29077e-10
ZFP36L1	144.544	1.49325	0.206747	-7.22259	5.10074e-13	3.68286e-11
BCAS2	152.086	1.49343	0.216765	-6.88961	5.59446e-12	3.29421e-10
FAM118A	26.3804	1.49385	0.343676	-4.34669	1.3821e-05	0.000275739
TLE3	33.6763	1.50143	0.320414	-4.68592	2.787e-06	6.62869e-05
SDCBP	118.433	1.50548	0.233202	-6.45566	1.07746e-10	5.31283e-09
OTULIN	71.9994	1.51137	0.252242	-5.99175	2.07599e-09	8.33833e-08
MX1	35.3682	1.53336	0.346403	-4.42652	9.57654e-06	0.000200975
RANBP2	80.1053	1.54296	0.25065	-6.15583	7.46833e-10	3.25866e-08
STX11	28.7437	1.54959	0.348463	-4.44693	8.71077e-06	0.00018344
MCL1	376.565	1.55641	0.174446	-8.92202	4.57855e-19	6.61164e-17
YPEL5	253.642	1.56456	0.254508	-6.14738	7.8773e-10	3.41256e-08
NCF1	31.9718	1.57659	0.303424	-5.19599	2.03634e-07	6.05411e-06
SPTY2D1	56.7769	1.57667	0.27188	-5.79915	6.66517e-09	2.42061e-07
APOBEC3H	23.5792	1.5784	0.390272	-4.04435	5.24684e-05	0.000873846
TUBB4B	251.417	1.57938	0.205167	-7.69804	1.38169e-14	1.18027e-12
MXD1	27.7299	1.58222	0.315701	-5.01177	5.39308e-07	1.47338e-05
KLF10	26.2076	1.59347	0.332355	-4.79448	1.63094e-06	4.05395e-05
H2AFX	94.2712	1.59386	0.226437	-7.03885	1.93827e-12	1.33587e-10
GPR183	78.1128	1.59648	0.282148	-5.65832	1.52863e-08	5.2085e-07
RCAN3	63.0575	1.59681	0.256688	-6.22084	4.94499e-10	2.22158e-08
SOCS3	58.9587	1.59712	0.260975	-6.11984	9.3672e-10	4.00085e-08
IL6ST	34.6415	1.606	0.312305	-5.14241	2.71239e-07	7.87111e-06
TIPARP	100.098	1.6122	0.253584	-6.35764	2.04879e-10	9.86181e-09
AC000120.2	15.1382	1.62696	0.394151	-4.12777	3.663e-05	0.000638598
SAP30	69.9977	1.62918	0.260944	-6.24342	4.28102e-10	1.95221e-08
CEMIP2	322.564	1.6315	0.263067	-6.20184	5.58073e-10	2.47059e-08
PDE4A	27.0732	1.64005	0.328494	-4.99264	5.95585e-07	1.60543e-05
STK17B	343.326	1.64262	0.170016	-9.66158	4.3906e-22	9.1824e-20
DDIT4	590.285	1.64555	0.181115	-9.08563	1.03097e-19	1.60328e-17
LEPROTL1	156.159	1.65568	0.198501	-8.34091	7.37213e-17	8.76706e-15
AC022966.1	44.0888	1.65707	0.282825	-5.85899	4.65678e-09	1.74342e-07
CHORDC1	93.3349	1.66271	0.239228	-6.95031	3.64472e-12	2.30263e-10
PMAIP1	164.479	1.66381	0.276376	-6.02008	1.74329e-09	7.19257e-08
NEDD9	35.2813	1.67511	0.326753	-5.12654	2.95113e-07	8.44273e-06
BHLHE40	92.1923	1.67628	0.314379	-5.33202	9.71259e-08	3.02087e-06
ATP1B3	173.526	1.67999	0.287388	-5.84571	5.04412e-09	1.87685e-07
ZC3H12A	41.6959	1.69761	0.293074	-5.79242	6.93776e-09	2.46067e-07
NABP1	56.869	1.70253	0.261565	-6.50903	7.56367e-11	3.82281e-09
SYAP1	150.965	1.70917	0.223761	-7.63836	2.20009e-14	1.80318e-12
BTG2	383.712	1.71935	0.201575	-8.52961	1.46845e-17	1.81758e-15
RARA	26.2795	1.72414	0.327986	-5.25674	1.46634e-07	4.44667e-06
RNF19A	160.386	1.72932	0.230215	-7.51176	5.83365e-14	4.65541e-12
INSIG1	31.2746	1.73731	0.306074	-5.67612	1.37787e-08	4.73374e-07
EIF4A3	86.8315	1.74327	0.310541	-5.61364	1.9811e-08	6.67521e-07
CDKN2A	27.8662	1.74384	0.322122	-5.4136	6.17712e-08	1.96148e-06
RALGAPA1	54.18	1.74616	0.258003	-6.76796	1.30607e-11	7.33455e-10
SMAD7	150.181	1.76203	0.255224	-6.90387	5.06045e-12	3.03877e-10
CD55	100.592	1.76234	0.255528	-6.89684	5.31713e-12	3.16161e-10
TNFRSF4	39.905	1.76275	0.362524	-4.86244	1.15949e-06	2.95476e-05
MTHFD2	26.8999	1.77682	0.321041	-5.53455	3.12028e-08	1.02851e-06
NUDT14	15.4416	1.77795	0.404871	-4.39138	1.12631e-05	0.00023078
KDM6B	68.4181	1.78408	0.55798	-3.19738	0.0013868	0.0142801
EVI2A	76.1992	1.7903	0.232057	-7.7149	1.21076e-14	1.04904e-12
CYP51A1	18.7183	1.80825	0.369825	-4.88949	1.01099e-06	2.6387e-05
CAPG	68.3121	1.84163	0.268847	-6.85009	7.3802e-12	4.22273e-10
DUSP16	27.7148	1.84899	0.311526	-5.93527	2.93361e-09	1.15535e-07
LINC01871	301.952	1.85327	0.174553	-10.6172	2.4779e-26	8.34915e-24
FOXO1	26.2336	1.85406	0.319934	-5.79512	6.82707e-09	2.46067e-07
P2RY10	63.0186	1.85929	0.282469	-6.5823	4.63225e-11	2.42195e-09
VPS37B	52.2351	1.88419	0.273841	-6.88059	5.96055e-12	3.47603e-10
NFE2L2	54.9896	1.88934	0.282277	-6.69323	2.18303e-11	1.17169e-09
SERTAD1	155.209	1.89547	0.210996	-8.98343	2.62444e-19	3.97931e-17
PDCL3	92.0143	1.89811	0.228544	-8.30525	9.96059e-17	1.11872e-14
FABP5	70.9428	1.89964	0.237732	-7.99068	1.34196e-15	1.37949e-13
FBXO2	22.9994	1.90298	0.390058	-4.8787	1.06789e-06	2.74438e-05
PTGER4	127.551	1.91134	0.202285	-9.44875	3.42913e-21	6.30232e-19
MAFF	91.6642	1.91203	0.603659	-3.1674	0.0015381	0.0155476
PDE4D	92.224	1.91247	0.293107	-6.52483	6.80777e-11	3.46967e-09
PTP4A1	32.5494	1.92001	0.303493	-6.32636	2.5101e-10	1.19267e-08
TSC22D2	40.1933	1.92081	0.292328	-6.57074	5.00645e-11	2.57323e-09
HEXIM1	63.6204	1.9215	0.277252	-6.93052	4.19309e-12	2.5688e-10
METRNL	249.234	1.93652	0.255749	-7.57194	3.677e-14	2.97347e-12
LGALS3	132.076	1.94189	0.236036	-8.22706	1.91857e-16	2.07788e-14
BIRC3	73.2043	1.94548	0.277609	-7.00797	2.41803e-12	1.57692e-10
SKI	35.3341	1.94564	0.317396	-6.13001	8.78739e-10	3.77982e-08
RPL13AP5	35.2149	1.94892	0.771329	-2.5267	0.011514	0.0742897
TSPYL2	89.8791	1.97308	0.252692	-7.80825	5.79891e-15	5.17212e-13
LINC00892	34.4083	1.98316	0.385503	-5.14433	2.68478e-07	7.82845e-06
AL031777.3	19.5179	1.98651	0.370786	-5.35757	8.43486e-08	2.63698e-06
SC5D	43.3437	1.98934	0.287215	-6.9263	4.31988e-12	2.62e-10
CACYBP	194.215	1.99724	0.247502	-8.06962	7.05162e-16	7.37381e-14
ZNF683	35.9428	1.998	0.720936	-2.77139	0.0055817	0.0427437
AL135905.2	35.7714	2.00368	0.296377	-6.76058	1.37443e-11	7.64761e-10
NCF1C	38.5649	2.02231	0.304184	-6.64831	2.96476e-11	1.5773e-09
STMN1	86.4344	2.02792	0.288999	-7.01705	2.26605e-12	1.52707e-10
GADD45A	78.5468	2.02866	0.230547	-8.79933	1.37639e-18	1.85507e-16
AL627171.2	14.7554	2.03732	0.447973	-4.54785	5.41959e-06	0.000118664
MAF	96.857	2.06097	0.261935	-7.86827	3.59589e-15	3.35524e-13
CXCR6	85.9271	2.06503	0.23395	-8.82683	1.07686e-18	1.48436e-16
RN7SL2	10.3838	2.09567	0.522732	-4.00907	6.09577e-05	0.00099384
JMJD6	50.6165	2.10658	0.303521	-6.94048	3.90765e-12	2.44329e-10
FASLG	29.2659	2.11462	0.382949	-5.52193	3.35292e-08	1.09921e-06
PTTG1	57.6641	2.1202	0.316071	-6.70797	1.97355e-11	1.06871e-09
UBE2S	192.781	2.12714	0.220471	-9.64814	5.00565e-22	1.01198e-19
XCL1	273.682	2.14392	0.290794	-7.37264	1.67284e-13	1.26823e-11
SLC38A2	95.3229	2.15083	0.229657	-9.36537	7.57863e-21	1.35189e-18
IFRD1	84.0453	2.16517	0.260913	-8.29844	1.05487e-16	1.16324e-14
KPNA2	38.3974	2.17038	0.334449	-6.48942	8.61684e-11	4.3191e-09
NEU1	62.3896	2.2004	0.300903	-7.31265	2.61917e-13	1.96115e-11
NAMPT	49.6505	2.20345	0.294808	-7.47419	7.76824e-14	6.11875e-12
TENT5C	112.323	2.21859	0.286473	-7.74451	9.59544e-15	8.43425e-13
HSPE1	450.537	2.2189	0.267124	-8.30661	9.84749e-17	1.11872e-14
GRASP	46.1146	2.2216	0.740561	-2.99989	0.00270081	0.0241956
RHOB	52.4761	2.2581	0.274903	-8.21417	2.1363e-16	2.2731e-14
ETV3	42.4987	2.28158	0.288163	-7.91767	2.4201e-15	2.40621e-13
CCNH	112.483	2.28188	0.223509	-10.2093	1.80084e-24	5.46104e-22
ZFAND2A	68.0741	2.29779	0.293628	-7.82551	5.05598e-15	4.64614e-13
CSRNP1	81.473	2.32713	0.293276	-7.93493	2.10606e-15	2.12888e-13
BTG3	76.7978	2.32993	0.250259	-9.31006	1.2776e-20	2.21389e-18
PDCD1	41.4335	2.36924	0.309808	-7.64745	2.04999e-14	1.70318e-12
HSPD1	361.028	2.37734	0.267861	-8.8753	6.97448e-19	9.83726e-17
REL	312.168	2.38087	0.250875	-9.49028	2.30423e-21	4.36723e-19
SIK1B	39.9106	2.45543	0.328871	-7.46624	8.25197e-14	6.41643e-12
SIK1	37.1629	2.4569	0.332513	-7.38888	1.48075e-13	1.1368e-11
SLC7A5	47.1276	2.45849	0.312155	-7.87585	3.38435e-15	3.2072e-13
KCNQ1OT1	46.0377	2.48271	0.276572	-8.97673	2.78939e-19	4.12626e-17
NR4A2	228.653	2.48783	0.298769	-8.32694	8.29609e-17	9.67611e-15
PRMT9	77.4015	2.53709	0.24107	-10.5243	6.67676e-26	2.13129e-23
HSPB1	202.898	2.57892	0.260761	-9.88998	4.60133e-23	1.03359e-20
DDIT3	68.0591	2.61038	0.259847	-10.0458	9.58276e-24	2.42164e-21
FOSL2	122.756	2.62289	0.262666	-9.98566	1.76131e-23	4.1086e-21
DNAJA1	413.403	2.64363	0.21112	-12.5219	5.66692e-36	3.43699e-33
CKAP2	33.3575	2.66663	0.378803	-7.03964	1.92737e-12	1.33587e-10
ITM2C	82.0268	2.71382	0.291858	-9.29844	1.42524e-20	2.40114e-18
ANKRD37	50.0609	2.73012	0.319553	-8.54355	1.30162e-17	1.64465e-15
PLK3	48.4105	2.75766	0.348455	-7.91396	2.49325e-15	2.43897e-13
SLC2A3	115.978	2.78426	0.22332	-12.4676	1.1219e-35	5.67025e-33
FAM177A1	213.164	2.79433	0.250493	-11.1553	6.74675e-29	2.72793e-26
RN7SL1	23.8325	2.83523	0.421352	-6.72888	1.70973e-11	9.42686e-10
HIST2H2AA3	145.429	2.88004	0.233542	-12.332	6.0939e-35	2.84304e-32
HIST2H2AA4	145.922	2.89005	0.231387	-12.4901	8.45068e-36	4.6594e-33
SKIL	67.0896	2.92177	0.28975	-10.0837	6.51927e-24	1.7191e-21
RGPD1	21.2934	3.00474	0.418571	-7.17857	7.04418e-13	5.02623e-11
ICOS	49.7344	3.07596	0.812737	-3.78469	0.000153898	0.00223835
PDE4B	129.977	3.12006	0.243968	-12.7888	1.89326e-37	1.43533e-34
DUSP5	70.7554	3.12157	0.340713	-9.16188	5.10021e-20	8.14021e-18
PHLDA1	70.2737	3.12388	0.308589	-10.1231	4.36285e-24	1.20276e-21
LMNA	50.7781	3.13445	0.338495	-9.25998	2.04478e-20	3.35178e-18
AC135068.8	60.9774	3.24604	0.323339	-10.0391	1.02596e-23	2.48899e-21
SAMSN1	202.344	3.25546	0.25811	-12.6127	1.79834e-36	1.21188e-33
RGPD2	26.5392	3.27465	0.415279	-7.88542	3.13475e-15	3.01782e-13
TUBB2A	42.3198	3.36976	0.330589	-10.1932	2.12627e-24	6.14088e-22
CKS2	76.2859	3.4336	0.309382	-11.0982	1.27925e-28	4.84916e-26
RGS2	135.467	3.44227	0.26428	-13.0251	8.80858e-39	7.632e-36
IER5L	97.2794	3.46479	0.25957	-13.3482	1.21371e-40	1.84029e-37
ATP1B1	40.3479	3.54552	0.368535	-9.6206	6.54513e-22	1.28052e-19
IFNG	211.694	3.5627	0.507915	-7.01437	2.30994e-12	1.53575e-10
HSPH1	165.016	3.56508	0.290835	-12.2581	1.52114e-34	6.5898e-32
TNF	75.8544	3.98341	0.304056	-13.1009	3.25204e-39	3.28727e-36
ZNF331	248.947	3.98934	0.267083	-14.9367	1.90044e-50	3.84206e-47
RGCC	217.55	4.0822	0.22874	-17.8465	3.079e-71	9.33708e-68
FRMD4B	52.4475	4.23627	0.322096	-13.1522	1.65286e-39	2.00492e-36
TNFSF9	67.0741	4.3545	0.662668	-6.57117	4.99231e-11	2.57323e-09
CREM	479.522	4.87029	0.498786	-9.76429	1.60232e-22	3.47073e-20
RN7SK	129.756	5.2091	0.613639	-8.48887	2.08665e-17	2.5311e-15
RF00100_ENSG00000202198	260.131	5.51605	0.760125	-7.25676	3.96484e-13	2.93253e-11
NR4A1	76.5273	6.4414	0.747633	-8.61572	6.95024e-18	8.96877e-16
DUSP4	149.113	6.60203	0.6165	-10.7089	9.2453e-27	3.2984e-24
HSPA6	130.63	6.79003	0.786346	-8.63492	5.87702e-18	7.74872e-16
HSPA1B	942.05	9.42129	0.374602	-25.1501	1.40836e-139	8.54173e-136

## Sheet: DESeq2_CD4_periphery vs PBMC
Spalte1	baseMean	log2FoldChange	lfcSE	stat	pvalue	padj
HSPA1B	1569.46	9.55997	0.649223	-14.7252	4.43931e-49	2.86385e-46
CREM	1100.39	5.73739	0.258612	-22.1853	4.75921e-109	2.7632e-105
CKS2	149.744	3.96969	0.703714	-5.64106	1.69008e-08	5.26546e-07
RGS2	231.296	3.9161	0.222606	-17.5921	2.83343e-69	5.48363e-66
ZNF331	498.245	3.76959	0.220524	-17.0938	1.64989e-65	2.39482e-62
SMAD7	203.366	3.75739	0.190856	-19.687	2.78585e-86	8.08732e-83
DUSP2	889.705	3.75509	0.236972	-15.8461	1.49501e-56	1.73601e-53
HIST2H2AA4	241.467	3.38688	0.222634	-15.2128	2.90932e-52	2.11144e-49
HIST2H2AA3	241.205	3.3857	0.222291	-15.2309	2.20385e-52	1.82794e-49
ETV3	98.5406	3.25489	0.25559	-12.7348	3.78712e-37	9.99456e-35
SAMSN1	363.433	3.2458	0.234547	-13.8386	1.49069e-43	6.65765e-41
NR4A2	418.077	3.24294	0.316736	-10.2386	1.33123e-24	1.71758e-22
FAM177A1	437.384	3.2307	0.23189	-13.932	4.0485e-44	2.13687e-41
CSRNP1	173.094	3.20169	0.267997	-11.9468	6.7492e-33	1.56743e-30
FRMD4B	115.275	3.18247	0.332499	-9.57136	1.0551e-21	1.20116e-19
TENT5C	159.246	3.18109	0.258893	-12.2873	1.05984e-34	2.56394e-32
LMNA	134.701	3.11656	0.224935	-13.8554	1.18021e-43	5.71025e-41
GABARAPL1	157.973	3.11612	0.232858	-13.3821	7.69701e-41	2.97926e-38
GRASP	117.202	3.05171	0.260479	-11.7158	1.05801e-31	1.98155e-29
GADD45A	268.457	3.04045	0.336003	-9.04887	1.44455e-19	1.42153e-17
UBE2S	362.948	2.98064	0.192565	-15.4786	4.83901e-54	4.68255e-51
HSPH1	233.287	2.98036	0.250403	-11.9022	1.15218e-32	2.47762e-30
DNAJA1	799.478	2.95498	0.274953	-10.7472	6.10713e-27	9.0918e-25
RGCC	676.133	2.92299	0.209679	-13.9403	3.60406e-44	2.09252e-41
SLC2A3	312.704	2.83308	0.21279	-13.314	1.91984e-40	6.70861e-38
ATP1B3	351.352	2.81492	0.296728	-9.48653	2.38859e-21	2.66695e-19
DDIT3	129.041	2.79839	0.216782	-12.9088	4.01521e-38	1.16561e-35
PDE4D	162.678	2.78698	0.234028	-11.9088	1.06521e-32	2.37871e-30
REL	399.999	2.77846	0.244023	-11.3861	4.90627e-30	8.1388e-28
PMAIP1	245.765	2.77391	0.25849	-10.7312	7.2634e-27	1.05428e-24
ZFP36	1036.04	2.75376	0.300628	-9.16004	5.18771e-20	5.28418e-18
LINC01871	270.344	2.73382	0.247696	-11.037	2.53354e-28	3.9756e-26
VPS37B	63.3442	2.6408	0.265284	-9.9546	2.40784e-23	2.97445e-21
SERTAD1	263.763	2.59211	0.223213	-11.6127	3.55075e-31	6.24717e-29
SIK1B	76.5348	2.58119	0.354063	-7.2902	3.09493e-13	1.87179e-11
NEU1	92.1047	2.53891	0.315907	-8.03692	9.21279e-16	6.77082e-14
SIK1	69.1047	2.52695	0.332181	-7.60713	2.80239e-14	1.89194e-12
PDE4B	262.62	2.47405	0.209961	-11.7834	4.7548e-32	9.20212e-30
SC5D	155.116	2.46604	0.568827	-4.3353	1.45559e-05	0.000239409
MIDN	147.843	2.43505	0.220772	-11.0297	2.74755e-28	4.19796e-26
TIPARP	212.482	2.42911	0.206011	-11.7912	4.33362e-32	8.98608e-30
H2AFX	153.705	2.41406	0.23072	-10.4632	1.27524e-25	1.76287e-23
PRMT9	135.956	2.38618	0.185044	-12.8952	4.79277e-38	1.32509e-35
BTG3	116.429	2.36598	0.266838	-8.8667	7.53436e-19	7.05556e-17
SYTL3	176.283	2.36422	0.173759	-13.6063	3.67246e-42	1.52302e-39
ZFAND2A	131.586	2.35822	0.339786	-6.94029	3.91292e-12	2.20567e-10
TUBB4B	423.782	2.33997	0.186011	-12.5798	2.72836e-36	6.88733e-34
IFRD1	139.211	2.30062	0.196517	-11.707	1.17378e-31	2.12967e-29
CD55	291.166	2.28324	0.219551	-10.3996	2.49057e-25	3.36285e-23
TSC22D2	78.5089	2.27073	0.252723	-8.98505	2.58611e-19	2.50249e-17
SGK1	114.146	2.26829	0.352791	-6.42957	1.27961e-10	5.94355e-09
CCNH	204.325	2.24849	0.168904	-13.3123	1.96428e-40	6.70861e-38
JMJD6	65.5331	2.2279	0.224472	-9.92506	3.23913e-23	3.918e-21
EIF4A3	169.81	2.2074	0.296527	-7.44419	9.75384e-14	6.15552e-12
HSPE1	877.004	2.18608	0.323038	-6.76726	1.31246e-11	6.74349e-10
SELENOK	660.939	2.16268	0.188825	-11.4534	2.26198e-30	3.86267e-28
BTG2	667.602	2.15985	0.165487	-13.0515	6.23387e-39	1.90494e-36
SYAP1	233.531	2.1504	0.182474	-11.7847	4.68026e-32	9.20212e-30
SAP30	105.829	2.13282	0.334763	-6.37114	1.87628e-10	8.31579e-09
EZR	528.265	2.09768	0.227602	-9.21647	3.07051e-20	3.24134e-18
RN7SL2	14.8573	2.09661	0.465419	-4.50478	6.64427e-06	0.00012093
NAF1	52.143	2.08409	0.360921	-5.77437	7.72393e-09	2.66935e-07
NAMPT	85.2739	2.07754	0.237234	-8.75733	1.99923e-18	1.78577e-16
SLC38A2	134.479	2.07472	0.2332	-8.89676	5.74993e-19	5.4728e-17
ICOS	123.974	2.06694	0.282695	-7.31154	2.64094e-13	1.6312e-11
AL627171.2	22.6602	2.05862	0.377072	-5.45949	4.77496e-08	1.33286e-06
PDCL3	189.631	2.05757	0.276292	-7.44706	9.54432e-14	6.08949e-12
KDM6B	149.636	2.05649	0.281556	-7.304	2.79327e-13	1.70713e-11
AL135905.2	70.0333	2.04853	0.270784	-7.56519	3.87296e-14	2.58465e-12
CHMP1B	158.62	2.04518	0.222919	-9.17455	4.53482e-20	4.70164e-18
NFE2L2	114.263	2.04076	0.200014	-10.2031	1.92097e-24	2.4246e-22
AC020916.1	207.275	2.04064	0.240919	-8.47022	2.44936e-17	2.03157e-15
BAG3	71.4792	2.03474	0.355473	-5.72405	1.04013e-08	3.49074e-07
PTP4A1	68.7833	2.03125	0.270983	-7.49586	6.58638e-14	4.29669e-12
CCL5	981.241	2.01908	0.195384	-10.3339	4.94939e-25	6.53094e-23
CST7	237.976	2.00909	0.209321	-9.59814	8.14031e-22	9.45252e-20
YPEL5	623.95	2.00642	0.242028	-8.29002	1.13233e-16	8.8842e-15
DDIT4	1076.59	1.99308	0.151215	-13.1804	1.13739e-39	3.66872e-37
TUBA1C	95.5484	1.98827	0.29504	-6.73899	1.59486e-11	8.12259e-10
FABP5	88.7735	1.9866	0.309549	-6.41774	1.38314e-10	6.32323e-09
TNFRSF18	92.8703	1.98381	0.315656	-6.28473	3.28421e-10	1.39183e-08
PLIN2	186.186	1.9752	0.329735	-5.99026	2.09509e-09	7.69879e-08
UBE2A	78.2174	1.94628	0.329322	-5.90997	3.42164e-09	1.2263e-07
HERPUD1	483.629	1.92162	0.197769	-9.7165	2.56451e-22	3.03868e-20
HEXIM1	103.013	1.91834	0.240236	-7.98524	1.4025e-15	1.01786e-13
RHOC	107.974	1.90406	0.330442	-5.76216	8.30451e-09	2.81965e-07
CKAP2	62.3066	1.90271	0.34841	-5.46112	4.7315e-08	1.32711e-06
NANS	89.3607	1.89941	0.201516	-9.42561	4.27602e-21	4.68426e-19
B3GNT2	61.1848	1.82546	0.326699	-5.58758	2.30261e-08	6.95401e-07
CYTOR	69.8688	1.81864	0.376726	-4.82749	1.38262e-06	2.94048e-05
SPTY2D1	102.44	1.8099	0.273937	-6.607	3.92187e-11	1.89753e-09
ZFAND5	212.478	1.79949	0.210427	-8.55161	1.21379e-17	1.03637e-15
JPT1	284.702	1.79858	0.567644	-3.1685	0.00153228	0.0120711
AC022966.1	86.0582	1.79066	0.217222	-8.24344	1.67326e-16	1.29533e-14
EVI2A	128.484	1.78511	0.213749	-8.35143	6.74426e-17	5.364e-15
PTGER4	302.607	1.7744	0.203997	-8.69813	3.3739e-18	2.96801e-16
SH2D2A	100.504	1.7457	0.280381	-6.22617	4.77982e-10	1.94067e-08
AC027290.2	86.7179	1.7369	0.282641	-6.14525	7.98359e-10	3.09018e-08
MCL1	648.581	1.72975	0.196649	-8.79612	1.41634e-18	1.28489e-16
SH2D1A	44.8982	1.72975	0.367299	-4.70938	2.48474e-06	4.94054e-05
MAF	158.647	1.7287	0.604102	-2.8616	0.00421505	0.0274664
RNF19A	267.047	1.72672	0.199156	-8.67019	4.31411e-18	3.73847e-16
CAPG	121.338	1.71838	0.379645	-4.5263	6.00256e-06	0.00011099
TPM4	196.33	1.71672	0.261254	-6.57106	4.99581e-11	2.39716e-09
JMY	129.145	1.71418	0.225261	-7.60976	2.74605e-14	1.87571e-12
IFNGR1	104.105	1.69825	0.283299	-5.99454	2.04068e-09	7.54661e-08
BCAS2	311.567	1.69267	0.233183	-7.25898	3.90019e-13	2.31066e-11
CACYBP	363.46	1.69067	0.29974	-5.64047	1.6959e-08	5.26546e-07
SOCS3	236.584	1.6896	0.303386	-5.56914	2.55994e-08	7.58318e-07
PLK3	146.771	1.67302	0.307881	-5.43399	5.5108e-08	1.51638e-06
SNHG15	234.314	1.66841	0.222277	-7.50597	6.09749e-14	4.02296e-12
GZMA	354.379	1.66499	0.265887	-6.26201	3.80055e-10	1.58748e-08
LDHA	832.188	1.65782	0.182971	-9.06058	1.29759e-19	1.29893e-17
HSPA5	635.155	1.65705	0.155761	-10.6384	1.97421e-26	2.79567e-24
LGALS3	235.078	1.65275	0.344101	-4.8031	1.56228e-06	3.2628e-05
STMN1	132.416	1.64894	0.384309	-4.29065	1.78151e-05	0.000285764
HSPD1	710.033	1.64839	0.295046	-5.5869	2.31162e-08	6.95401e-07
RALGAPA1	92.6686	1.64812	0.23802	-6.92427	4.38227e-12	2.44649e-10
IDI1	207.666	1.64658	0.232878	-7.07057	1.54302e-12	8.95879e-11
PLEKHA2	56.9352	1.62619	0.23622	-6.88423	5.81003e-12	3.18236e-10
RAB11FIP1	130.86	1.62445	0.262917	-6.17857	6.46833e-10	2.57227e-08
CNOT6L	426.432	1.62302	0.143858	-11.2821	1.60906e-29	2.59506e-27
PPP1CB	276.799	1.6223	0.190905	-8.49795	1.92976e-17	1.6238e-15
TNFRSF4	131.885	1.62136	0.388791	-4.17027	3.04239e-05	0.000448327
RAB8B	117.245	1.61464	0.320876	-5.03198	4.85446e-07	1.14109e-05
DNAJB6	174.962	1.60665	0.255845	-6.27977	3.39078e-10	1.42658e-08
MYBL1	106.172	1.60649	0.257453	-6.23993	4.37753e-10	1.78986e-08
ARID5A	133.136	1.60262	0.202512	-7.91374	2.49771e-15	1.7685e-13
TGIF1	105.655	1.60152	0.268302	-5.9691	2.38564e-09	8.71134e-08
PTPN22	104.89	1.5953	0.275258	-5.79566	6.80518e-09	2.38017e-07
AC129492.1	95.9537	1.58878	0.346176	-4.58952	4.44265e-06	8.45706e-05
SOD2	189.204	1.58214	0.233185	-6.78491	1.16161e-11	6.02169e-10
RILPL2	221.75	1.5815	0.269369	-5.87112	4.32869e-09	1.52318e-07
RUNX3	257.384	1.57739	0.178145	-8.85455	8.40227e-19	7.74342e-17
ETF1	94.3261	1.57599	0.246332	-6.39783	1.57602e-10	7.14874e-09
ZBTB10	55.1201	1.57385	0.353675	-4.44999	8.58731e-06	0.000149723
ERO1B	89.7598	1.5721	0.202192	-7.77529	7.52721e-15	5.26542e-13
ALG13	105.886	1.57193	0.246479	-6.37753	1.79972e-10	8.10013e-09
SDCBP	266.032	1.56015	0.168301	-9.27001	1.86128e-20	2.00122e-18
CBFB	117.035	1.55489	0.279294	-5.56723	2.5882e-08	7.62796e-07
GLUL	122.328	1.55337	0.264458	-5.87377	4.25995e-09	1.50813e-07
TSPYL2	151.35	1.55305	0.250768	-6.19317	5.89645e-10	2.36102e-08
SLC20A1	71.6405	1.55273	0.271434	-5.72048	1.06225e-08	3.54448e-07
LDLRAD4	66.0416	1.51516	0.34796	-4.3544	1.33432e-05	0.000221344
FKBP4	56.2852	1.51125	0.324837	-4.65232	3.28217e-06	6.41626e-05
TNFRSF1B	159.383	1.5028	0.304212	-4.93997	7.81332e-07	1.74049e-05
PELI1	72.3981	1.49981	0.315049	-4.76056	1.93061e-06	3.91928e-05
PIM3	132.556	1.49914	0.223405	-6.71043	1.94056e-11	9.62982e-10
ZFP36L1	280.906	1.49462	0.242852	-6.15446	7.53354e-10	2.93555e-08
ZBTB1	133.873	1.48886	0.183577	-8.11028	5.05037e-16	3.80811e-14
SEC14L1	57.781	1.47406	0.226896	-6.49663	8.21392e-11	3.84597e-09
HNRNPAB	231.632	1.47324	0.224286	-6.56855	5.08061e-11	2.41787e-09
LMO4	68.6781	1.47203	0.285841	-5.14983	2.60724e-07	6.61033e-06
RNF125	78.2535	1.4636	0.217617	-6.72559	1.74883e-11	8.82933e-10
RANBP2	134.423	1.45843	0.299429	-4.87071	1.112e-06	2.4001e-05
LEPROTL1	466.994	1.45795	0.17429	-8.36509	6.00677e-17	4.84379e-15
CTLA4	61.0976	1.45402	0.352795	-4.12144	3.76507e-05	0.000537101
OAT	52.5894	1.45146	0.293215	-4.95017	7.4148e-07	1.66862e-05
IRF2BPL	54.2825	1.44911	0.252358	-5.74229	9.34024e-09	3.15287e-07
LUZP1	72.1973	1.44382	0.260233	-5.54818	2.88653e-08	8.33792e-07
P2RY10	149.038	1.4431	0.211227	-6.83197	8.37537e-12	4.50254e-10
CYCS	637.603	1.42721	0.256865	-5.55625	2.75631e-08	8.04179e-07
GPR65	148.213	1.42691	0.219207	-6.5094	7.54507e-11	3.56152e-09
ANXA1	1421.42	1.41771	0.174282	-8.13455	4.13457e-16	3.15859e-14
JARID2	86.3173	1.41181	0.221869	-6.36325	1.97529e-10	8.6883e-09
DCTN6	64.4572	1.40998	0.234144	-6.02186	1.72424e-09	6.41726e-08
STOM	51.7382	1.40327	0.322894	-4.3459	1.38706e-05	0.000228786
CLEC2B	399.529	1.40059	0.18712	-7.48498	7.15606e-14	4.61645e-12
PNP	73.923	1.39733	0.360944	-3.87131	0.000108252	0.00130396
MAP1LC3B	369.945	1.39006	0.196669	-7.06804	1.57143e-12	9.03338e-11
AHI1	62.3879	1.38228	0.226231	-6.11003	9.96149e-10	3.78016e-08
BRD1	129.357	1.38225	0.180299	-7.66642	1.76858e-14	1.22242e-12
SLBP	140.864	1.37898	0.270326	-5.10118	3.37549e-07	8.30428e-06
MYADM	145.187	1.3786	0.299096	-4.60922	4.04185e-06	7.77052e-05
GNG2	34.7396	1.37706	0.318304	-4.32626	1.51665e-05	0.000247351
RRM1	55.2968	1.3746	0.292198	-4.70434	2.54688e-06	5.04682e-05
DYNLL1	403.219	1.36928	0.259309	-5.28052	1.28819e-07	3.36901e-06
TUBA4A	772.986	1.36715	0.237068	-5.7669	8.07428e-09	2.7576e-07
PIK3R1	701.756	1.36216	0.171005	-7.9656	1.64423e-15	1.17857e-13
CCR6	35.7196	1.35736	0.33141	-4.09571	4.20873e-05	0.000590239
HIST3H2A	87.8063	1.35555	0.252742	-5.36337	8.16812e-08	2.19591e-06
TLE4	178.002	1.35038	0.198655	-6.79759	1.06385e-11	5.6152e-10
Z94721.2	36.8858	1.34021	0.314616	-4.25984	2.04576e-05	0.000320153
STK17A	450.09	1.33885	0.222277	-6.02334	1.7085e-09	6.39971e-08
SLC3A2	285.425	1.3303	0.179288	-7.41991	1.172e-13	7.31683e-12
GPCPD1	119.543	1.32863	0.193204	-6.87681	6.1206e-12	3.32114e-10
HERPUD2	200.532	1.32732	0.192077	-6.91034	4.83501e-12	2.67353e-10
STAT4	98.8486	1.3179	0.197636	-6.66832	2.5875e-11	1.27314e-09
SKI	72.6361	1.31174	0.23015	-5.69953	1.2014e-08	3.96327e-07
JOSD1	108.546	1.30894	0.248498	-5.2674	1.3837e-07	3.58651e-06
GPR132	55.8243	1.30584	0.238018	-5.48632	4.10384e-08	1.16229e-06
TMEM107	75.5072	1.30454	0.225198	-5.79284	6.92079e-09	2.40612e-07
CHD1	245.498	1.30448	0.228956	-5.69752	1.2156e-08	3.98744e-07
MID1IP1	92.7873	1.3009	0.405865	-3.20526	0.00134939	0.0108512
AC025171.3	50.254	1.30014	0.291376	-4.46206	8.11768e-06	0.000143693
HIF1A	63.9335	1.29875	0.237553	-5.46721	4.57168e-08	1.2885e-06
CISD2	96.2517	1.28807	0.236953	-5.43598	5.44964e-08	1.51122e-06
LINC-PINT	112.349	1.28642	0.204591	-6.28779	3.22017e-10	1.37473e-08
ISCA1	189.585	1.28341	0.236118	-5.43544	5.466e-08	1.51122e-06
CEMIP2	483.749	1.27971	0.290865	-4.39967	1.08413e-05	0.000184589
TOB2	55.9136	1.27201	0.291067	-4.37015	1.24161e-05	0.000207746
GTF2B	152.045	1.26871	0.207628	-6.1105	9.93197e-10	3.78016e-08
NXT1	132.907	1.26266	0.226624	-5.5716	2.52404e-08	7.51516e-07
WDR45B	48.4054	1.26162	0.25922	-4.86699	1.13309e-06	2.43657e-05
PAF1	48.098	1.26146	0.287868	-4.38207	1.17555e-05	0.000197832
DNAJB9	87.6666	1.25748	0.251909	-4.99181	5.98161e-07	1.3727e-05
ARRDC2	116.473	1.2574	0.255677	-4.91792	8.74676e-07	1.93831e-05
GSPT1	227.645	1.24897	0.1959	-6.37554	1.82319e-10	8.14263e-09
ERN1	106.046	1.24693	0.245862	-5.07166	3.94369e-07	9.50085e-06
ZFP36L2	3668.33	1.24573	0.147148	-8.46584	2.54321e-17	2.0797e-15
NABP1	95.8085	1.2451	0.333134	-3.73752	0.000185845	0.00208707
TNFAIP3	1112.68	1.24495	0.301318	-4.13168	3.60119e-05	0.000517397
PPP1R10	256.609	1.24349	0.170749	-7.28254	3.27591e-13	1.96082e-11
GGCX	32.5728	1.2429	0.287886	-4.31735	1.57915e-05	0.000256105
BICDL1	53.9411	1.24123	0.276528	-4.48861	7.1688e-06	0.000129664
RNF11	55.72	1.24093	0.249307	-4.9775	6.4411e-07	1.47232e-05
TP53BP2	48.4997	1.23891	0.25909	-4.78177	1.73759e-06	3.56483e-05
SOCS2	44.6864	1.23659	0.2922	-4.232	2.31618e-05	0.000354822
HSPB1	404.551	1.23157	0.290069	-4.2458	2.17813e-05	0.000337233
GCH1	50.4396	1.23089	0.295504	-4.1654	3.10807e-05	0.000455693
H3F3AP4	27.1737	1.22771	0.306594	-4.00436	6.21853e-05	0.000815006
CRYBG1	381.661	1.2272	0.240213	-5.1088	3.24204e-07	8.00991e-06
RLF	57.6552	1.22472	0.273835	-4.47247	7.73229e-06	0.00013729
AC253572.2	87.1468	1.2238	0.354788	-3.4494	0.000561841	0.00524446
IDS	213.438	1.22165	0.2062	-5.92458	3.13091e-09	1.12907e-07
H2AFZ	669.185	1.21868	0.197519	-6.16993	6.83185e-10	2.69835e-08
HIST1H1C	112.908	1.21815	0.326761	-3.72794	0.000193048	0.00214309
MT-ATP8	189.335	1.21457	0.192736	-6.30174	2.9433e-10	1.26584e-08
CNBD2	32.8269	1.21453	0.299123	-4.06031	4.90085e-05	0.000677484
EML4	264.538	1.2135	0.178687	-6.79121	1.11199e-11	5.81638e-10
SELENOS	145.573	1.20421	0.193864	-6.21161	5.24442e-10	2.11452e-08
PRR7	57.0406	1.19555	0.281889	-4.24122	2.22306e-05	0.000343273
CDKN1B	311.968	1.19104	0.178978	-6.65468	2.83909e-11	1.38519e-09
ISG20L2	79.5372	1.18961	0.297056	-4.00465	6.21103e-05	0.000815006
PHTF2	70.4699	1.18632	0.304028	-3.902	9.54003e-05	0.00116078
DOK2	208.836	1.18547	0.299599	-3.95686	7.59412e-05	0.000966918
MTFP1	81.8061	1.1833	0.258581	-4.57612	4.7368e-06	8.95826e-05
TLE3	63.225	1.18173	0.249693	-4.7327	2.21548e-06	4.46635e-05
TGFB1	207.209	1.17763	0.167432	-7.03345	2.01491e-12	1.14692e-10
NUP58	36.5318	1.17591	0.284534	-4.13276	3.58437e-05	0.000517397
CCND2	148.104	1.17232	0.207546	-5.64846	1.61893e-08	5.10844e-07
PTPRE	66.0572	1.16556	0.243448	-4.78774	1.68673e-06	3.47819e-05
NCF1C	83.7325	1.16447	0.277961	-4.18933	2.79782e-05	0.000419745
ARF4	120.768	1.16232	0.229868	-5.05646	4.27114e-07	1.0205e-05
CD96	134.071	1.15746	0.182112	-6.35574	2.07422e-10	8.98728e-09
ING2	62.3415	1.1568	0.232472	-4.97608	6.48848e-07	1.47734e-05
AKIRIN2	124.729	1.15246	0.214876	-5.36335	8.16944e-08	2.19591e-06
ARAP2	84.8559	1.15204	0.21323	-5.40279	6.56125e-08	1.78848e-06
LINC00892	83.8094	1.15039	0.378524	-3.03916	0.00237241	0.0171108
RNF149	96.8404	1.14863	0.199031	-5.77112	7.87454e-09	2.7053e-07
AL118516.1	154.27	1.14841	0.258691	-4.4393	9.02516e-06	0.000156886
TWISTNB	95.276	1.14756	0.269539	-4.25747	2.06755e-05	0.000322694
NDRG1	67.408	1.14748	0.317378	-3.6155	0.00029977	0.00312805
HOPX	109.891	1.14739	0.259142	-4.42766	9.52598e-06	0.000164118
NAA50	68.5702	1.14572	0.281639	-4.06805	4.74083e-05	0.000656927
SQSTM1	202.522	1.14172	0.333417	-3.42429	0.000616397	0.00569873
MAT2A	113.313	1.14078	0.203862	-5.59584	2.19558e-08	6.6741e-07
AZIN1	75.5944	1.13638	0.265724	-4.27655	1.8981e-05	0.000300282
CDK17	53.25	1.13228	0.236512	-4.78742	1.68937e-06	3.47819e-05
AC134669.1	34.2014	1.13022	0.318204	-3.55188	0.000382488	0.00382884
RBM8A	388.804	1.12843	0.155645	-7.25005	4.16617e-13	2.44331e-11
G3BP2	301.842	1.12452	0.167338	-6.72003	1.8169e-11	9.09389e-10
ATG101	59.818	1.12201	0.322581	-3.47822	0.000504764	0.00478085
STK17B	798.679	1.11697	0.13806	-8.0905	5.94195e-16	4.42294e-14
RPL41P2	52.513	1.11013	0.294733	-3.76655	0.000165518	0.00189173
CALM2	337.529	1.10875	0.264003	-4.19977	2.67187e-05	0.000401888
FBXO34	31.2399	1.10744	0.328773	-3.36841	0.000756034	0.00668117
CCDC107	238.208	1.10632	0.276445	-4.00193	6.28267e-05	0.000819712
SRSF7	1121.4	1.10565	0.194402	-5.68742	1.28971e-08	4.18328e-07
GPR183	323.642	1.10538	0.203738	-5.42546	5.78044e-08	1.58308e-06
RAB9A	123.635	1.10417	0.247667	-4.45828	8.26186e-06	0.000144919
VDAC1	244.378	1.10393	0.199489	-5.53378	3.13401e-08	8.96358e-07
BCL2A1	75.8381	1.10157	0.246932	-4.46104	8.15636e-06	0.000143939
ARL4C	1395.75	1.1003	0.182047	-6.04401	1.50331e-09	5.66767e-08
AC103724.4	58.8729	1.09946	0.278215	-3.95185	7.755e-05	0.00098309
PRNP	106.645	1.09776	0.194906	-5.63223	1.77896e-08	5.4616e-07
FRAT1	45.2772	1.09713	0.272231	-4.03015	5.5741e-05	0.000751482
LYST	44.4436	1.09181	0.269289	-4.05442	5.02579e-05	0.000691463
RYBP	61.9955	1.09111	0.269424	-4.04979	5.12638e-05	0.000703635
DDX21	375.172	1.09092	0.17469	-6.2449	4.24065e-10	1.74619e-08
AL590764.2	33.7294	1.09025	0.322395	-3.38172	0.000720331	0.00644413
DNAJC1	145.787	1.08922	0.233198	-4.6708	3.00024e-06	5.88494e-05
TOB1	561.051	1.08774	0.247376	-4.39711	1.09702e-05	0.000186236
ACTN4	106.705	1.08555	0.278537	-3.89734	9.72537e-05	0.00117636
PPP3CA	90.6501	1.08042	0.201886	-5.35162	8.71721e-08	2.32166e-06
HAUS3	57.5409	1.07874	0.252237	-4.2767	1.89681e-05	0.000300282
OTULIN	94.6317	1.07859	0.240515	-4.48453	7.30751e-06	0.000131354
AC016831.7	17.4581	1.07753	0.422973	-2.5475	0.0108497	0.0559846
SNHG12	235.696	1.07655	0.169351	-6.35688	2.05893e-10	8.98728e-09
NINJ1	72.5764	1.07463	0.254706	-4.21909	2.45285e-05	0.000370866
NR3C1	167.646	1.07274	0.212839	-5.04015	4.65157e-07	1.10684e-05
MED29	68.86	1.07242	0.223144	-4.80596	1.54011e-06	3.22811e-05
NFKB2	43.506	1.06996	0.290312	-3.68556	0.000228201	0.00247652
DBF4	86.0016	1.06884	0.211323	-5.05785	4.24002e-07	1.01725e-05
GZMK	524.415	1.06824	0.188034	-5.68108	1.3385e-08	4.3174e-07
BAZ1A	280.042	1.06621	0.189331	-5.63142	1.7873e-08	5.4616e-07
HIST2H2AC	77.1306	1.0651	0.251502	-4.23494	2.28612e-05	0.000351143
NDUFV2	213.928	1.06278	0.233875	-4.54425	5.51314e-06	0.000102597
ROMO1	253.118	1.06271	0.191723	-5.54294	2.97442e-08	8.54925e-07
PBX4	53.8596	1.06185	0.266706	-3.98134	6.85275e-05	0.000882197
HIST1H1E	55.5535	1.06112	0.276639	-3.83577	0.000125173	0.00147117
CLK1	185.831	1.06098	0.187427	-5.66078	1.50689e-08	4.83371e-07
NCOA2	47.1406	1.05894	0.270617	-3.91306	9.11326e-05	0.00112788
AC026979.2	175.879	1.05205	0.24572	-4.28148	1.85656e-05	0.000296131
CDC42EP3	125.429	1.05199	0.375208	-2.80375	0.0050512	0.0315191
RIT1	44.3199	1.05149	0.265577	-3.95927	7.51799e-05	0.000961442
IVNS1ABP	98.1553	1.04726	0.203289	-5.15158	2.58301e-07	6.57762e-06
B4GALT1	47.0778	1.03635	0.258929	-4.00247	6.26841e-05	0.000819693
IRS2	78.5937	1.03223	0.384364	-2.68555	0.0072411	0.0412882
CMIP	56.6967	1.03071	0.254861	-4.04421	5.2501e-05	0.000715541
NUDT4	129.882	1.02674	0.205512	-4.99602	5.85258e-07	1.34842e-05
CEBPB	353.835	1.02107	0.173196	-5.89544	3.73686e-09	1.33106e-07
GPBP1	457.021	1.02085	0.180721	-5.64874	1.61623e-08	5.10844e-07
CMC2	62.6967	1.01745	0.255776	-3.9779	6.95257e-05	0.000891095
TOMM5	248.141	1.01681	0.1827	-5.56547	2.61444e-08	7.66638e-07
CHORDC1	143.405	1.01438	0.273258	-3.71215	0.000205506	0.00225552
COX17	233.766	1.01286	0.226275	-4.47624	7.59686e-06	0.000135299
ARL6IP1	209.467	1.00889	0.178465	-5.65313	1.57549e-08	5.02599e-07
BRD2	192.262	1.00849	0.225269	-4.47685	7.57531e-06	0.000135299
AHR	34.88	1.00082	0.338063	-2.96047	0.00307173	0.0212568
PPP2CA	47.6077	1.00012	0.28234	-3.54226	0.000396712	0.00393056
AMD1	237.482	0.999127	0.198855	-5.02439	5.05027e-07	1.17758e-05
HMGB2	550.734	0.99481	0.264631	-3.75923	0.000170436	0.00193624
SRSF2	349.862	0.992844	0.218236	-4.5494	5.37991e-06	0.000100761
PNRC1	1779.49	0.992131	0.145514	-6.81812	9.22391e-12	4.91321e-10
USP12	54.2192	0.989138	0.272055	-3.6358	0.000277116	0.00295218
RRBP1	48.5953	0.986549	0.252578	-3.90592	9.38695e-05	0.00114738
RGPD5	32.5069	0.985443	0.303958	-3.24204	0.00118677	0.00980144
SMURF2	53.661	0.984891	0.245177	-4.01706	5.89289e-05	0.000786532
ANKRD39	38.6836	0.984355	0.270116	-3.6442	0.000268229	0.00286275
BCL2L11	73.5332	0.982906	0.300877	-3.26681	0.00108768	0.00908647
CSKMT	57.1928	0.982662	0.24508	-4.00956	6.08326e-05	0.000806379
TENT4B	31.777	0.98006	0.2921	-3.35522	0.000793028	0.00697624
PCNA	55.1367	0.977044	0.317588	-3.07645	0.00209481	0.0156531
ZNF593	52.9826	0.976544	0.34741	-2.81093	0.0049399	0.0310401
H2AFJ	162.361	0.976318	0.198556	-4.9171	8.78379e-07	1.93911e-05
ADSS	101.535	0.975232	0.227294	-4.29062	1.78172e-05	0.000285764
RBM38	189.599	0.975162	0.228462	-4.26837	1.96903e-05	0.000310658
NUFIP2	158.555	0.974442	0.214057	-4.55226	5.30731e-06	9.97226e-05
FAM53C	34.3492	0.974204	0.291322	-3.34408	0.00082556	0.007197
TIFA	48.5904	0.972793	0.377563	-2.57651	0.00998041	0.0526306
STIP1	72.6875	0.969451	0.252493	-3.83952	0.000123274	0.0014529
PAFAH1B1	180.713	0.967638	0.182429	-5.30418	1.13178e-07	2.98688e-06
SOCS1	475.821	0.96628	0.1921	-5.03008	4.90282e-07	1.14781e-05
ABHD3	37.9592	0.964237	0.284317	-3.39142	0.000695322	0.00625898
PNPLA8	63.8606	0.962048	0.239715	-4.0133	5.98749e-05	0.000797325
DNTTIP2	207.442	0.961999	0.214685	-4.48097	7.43048e-06	0.000133152
ZNRF2	31.5252	0.959559	0.284149	-3.37696	0.000732927	0.0065079
GNA13	76.4148	0.957481	0.304318	-3.14631	0.00165343	0.0128512
NOTCH2NLA	20.9041	0.954394	0.374767	-2.54663	0.0108768	0.0559846
CEBPZ	203.055	0.952134	0.19845	-4.79784	1.60382e-06	3.33755e-05
AC025164.1	119.986	0.95162	0.205164	-4.63834	3.51218e-06	6.81998e-05
NFKB1	204.538	0.948922	0.208308	-4.55538	5.22911e-06	9.85721e-05
GLS	233.312	0.948005	0.186755	-5.07619	3.85083e-07	9.3158e-06
RNF168	100.612	0.947581	0.223139	-4.24659	2.17049e-05	0.000336949
CTSC	166.897	0.945635	0.341751	-2.76702	0.00565705	0.0343565
GRPEL1	116.491	0.943755	0.216934	-4.35043	1.35873e-05	0.000224752
CDC34	42.5978	0.942353	0.258138	-3.65058	0.000261644	0.00280796
PHYH	50.2217	0.942181	0.260615	-3.61522	0.00030009	0.00312805
NASP	238.412	0.942058	0.232892	-4.04504	5.23135e-05	0.000714664
KMT5A	52.6673	0.940769	0.272729	-3.44946	0.000561713	0.00524446
POLR2A	96.1385	0.939618	0.219622	-4.27835	1.88284e-05	0.000299501
PPP3R1	23.56	0.939314	0.331647	-2.83227	0.00462186	0.0294561
ITGB1	543.831	0.937242	0.22285	-4.2057	2.6027e-05	0.000392501
IRF7	54.8701	0.935762	0.290329	-3.22311	0.00126806	0.0103259
CDK2AP2	144.472	0.935716	0.229061	-4.08502	4.40738e-05	0.00061365
PPP1R15B	103.874	0.934357	0.231852	-4.02996	5.57852e-05	0.000751482
KANSL2	50.5756	0.933895	0.267399	-3.49251	0.000478501	0.00459203
CAPZA1	224.733	0.93188	0.176867	-5.26883	1.37297e-07	3.57466e-06
ZNF831	111.733	0.92943	0.190082	-4.88963	1.01023e-06	2.19678e-05
UBE2D1	58.1813	0.923085	0.233552	-3.95238	7.73781e-05	0.000983057
SCO2	40.0618	0.920459	0.28999	-3.17411	0.00150298	0.0118887
LINC00623	54.1378	0.919141	0.239056	-3.84487	0.000120615	0.00142625
JMJD1C	185.293	0.917029	0.183208	-5.00538	5.57507e-07	1.2896e-05
BZW1	136.738	0.914247	0.176179	-5.1893	2.11083e-07	5.44688e-06
HSPA4	90.5406	0.913415	0.25134	-3.63419	0.00027886	0.00295449
NUDT4B	25.1183	0.91195	0.324972	-2.80624	0.00501234	0.0313933
RNF139	81.8455	0.91048	0.251543	-3.61958	0.000295087	0.00309814
FOXO1	61.4819	0.910406	0.272834	-3.33684	0.000847357	0.00732106
IL32	1608.29	0.910173	0.206367	-4.41046	1.0315e-05	0.000176663
REEP5	215.383	0.910008	0.258591	-3.5191	0.000433013	0.00424675
SMC4	76.6319	0.907083	0.258081	-3.51472	0.000440216	0.00430285
TIGIT	91.5602	0.906221	0.364603	-2.4855	0.0129369	0.0638161
SERPINB9	146.898	0.905694	0.23013	-3.93557	8.29984e-05	0.00104305
RPL22L1	465.752	0.903588	0.144569	-6.25021	4.09899e-10	1.69991e-08
YAF2	80.2665	0.902427	0.24285	-3.71598	0.00020242	0.00223431
CYTIP	954.667	0.900605	0.161532	-5.57539	2.4697e-08	7.39128e-07
TRA2A	250.411	0.898478	0.174162	-5.15888	2.48436e-07	6.38239e-06
DUSP16	57.3774	0.896467	0.260641	-3.43948	0.000582839	0.00542302
ARIH1	109.024	0.896257	0.2043	-4.38698	1.14937e-05	0.000194555
TMEM70	70.5563	0.895726	0.21754	-4.11753	3.82957e-05	0.000543631
PDZD11	46.4786	0.89283	0.30451	-2.93202	0.00336764	0.0230291
UBE2B	403.007	0.888735	0.164703	-5.39599	6.81476e-08	1.8489e-06
NSMCE3	188.85	0.887925	0.226987	-3.91179	9.16159e-05	0.00112935
TANK	121.075	0.887444	0.284371	-3.12073	0.00180406	0.0138504
RORA	265.518	0.886723	0.167692	-5.28782	1.23782e-07	3.25194e-06
SPPL2A	82.4773	0.886041	0.211757	-4.18424	2.86122e-05	0.00042705
RAB5A	82.9856	0.884859	0.25976	-3.40645	0.000658144	0.00599872
CKLF	313.596	0.883363	0.270077	-3.27078	0.00107251	0.00899759
VMP1	209.769	0.882877	0.224238	-3.93723	8.24285e-05	0.00104039
ARFGAP3	75.5861	0.881708	0.23587	-3.73811	0.000185409	0.00208701
IRF2BP2	170.283	0.881491	0.273313	-3.22521	0.0012588	0.0102649
AC087239.1	56.7898	0.881384	0.264779	-3.32876	0.000872347	0.00749237
AC012615.1	65.7589	0.880539	0.425542	-2.06922	0.0385258	0.14053
EFHD2	113.717	0.877315	0.217577	-4.0322	5.52574e-05	0.000748254
RPP21	85.0277	0.875882	0.202328	-4.32902	1.49775e-05	0.000245647
AC109326.1	27.1928	0.874817	0.32451	-2.69581	0.00702181	0.040405
SNU13	487.219	0.874661	0.169576	-5.15794	2.49676e-07	6.38599e-06
SPAG9	85.2968	0.871423	0.292553	-2.97868	0.00289489	0.0201773
SMIM4	55.2297	0.86953	0.262008	-3.31871	0.000904339	0.00771012
CSNK1D	50.2956	0.868223	0.243588	-3.56431	0.000364821	0.00369531
MX1	64.8678	0.867461	0.323185	-2.6841	0.00727244	0.0413959
PGK1	462.697	0.866923	0.176799	-4.90343	9.41768e-07	2.07118e-05
MAPKAPK2	71.7974	0.8665	0.247756	-3.49739	0.000469834	0.00453132
DDX24	444.84	0.865286	0.169134	-5.11599	3.12101e-07	7.81795e-06
PWWP3A	32.1851	0.863583	0.299829	-2.88025	0.00397362	0.0262895
RNF138	91.4266	0.862575	0.311002	-2.77353	0.00554516	0.0338897
YWHAH	93.3973	0.861446	0.358364	-2.40383	0.0162243	0.0760275
ALYREF	85.1955	0.860559	0.241058	-3.56992	0.000357086	0.00362455
GATA3	135.58	0.860528	0.22864	-3.76369	0.000167426	0.00190603
ITM2C	69.0664	0.859908	0.257007	-3.34585	0.000820301	0.00716191
MECP2	119.784	0.858214	0.199355	-4.30495	1.6702e-05	0.000269367
THAP9-AS1	26.9621	0.857495	0.328438	-2.61082	0.00903244	0.0490116
INTS6	68.1477	0.857338	0.232653	-3.68505	0.000228658	0.00247685
MAP4K5	42.3146	0.856963	0.265988	-3.22181	0.00127385	0.0103585
TMED5	99.1034	0.856937	0.227682	-3.76374	0.00016739	0.00190603
PHF19	36.7873	0.856193	0.311951	-2.74464	0.00605774	0.0361101
PLEKHO1	105.545	0.855784	0.262665	-3.25808	0.00112168	0.00934359
SMG1P3	23.8762	0.855238	0.317123	-2.69687	0.00699956	0.0403169
SH3GLB1	128.596	0.854356	0.228767	-3.73461	0.000188006	0.00210726
TRA2B	418.003	0.854062	0.192877	-4.42801	9.51076e-06	0.000164118
ALOX5AP	293.259	0.852482	0.224313	-3.80042	0.000144452	0.00167069
CCDC47	63.5221	0.852243	0.311083	-2.7396	0.00615141	0.0364812
ELOVL5	85.4507	0.850421	0.237948	-3.57398	0.0003516	0.00357512
SMCHD1	593.933	0.848426	0.164843	-5.14689	2.64843e-07	6.68555e-06
SNAP47	58.5979	0.846516	0.322369	-2.62592	0.00864143	0.0475126
ZPR1	74.0351	0.844803	0.223106	-3.78655	0.000152752	0.00175967
YWHAZ	430.76	0.842451	0.1574	-5.3523	8.68409e-08	2.32166e-06
H2AFV	244.264	0.842354	0.189141	-4.45357	8.44538e-06	0.000147692
RHOG	161.852	0.84227	0.181435	-4.64226	3.44612e-06	6.71414e-05
DPP4	94.3159	0.842239	0.236657	-3.5589	0.000372407	0.00375381
RABGAP1L	50.3075	0.839796	0.301412	-2.7862	0.00533294	0.0329909
RMND5A	43.9793	0.839673	0.272148	-3.08536	0.00203308	0.0152508
DYNC1LI1	91.6823	0.839474	0.21016	-3.99445	6.48452e-05	0.000842263
RPS26	6414.55	0.837994	0.178207	-4.70236	2.57175e-06	5.07877e-05
IFI27L2	202.705	0.837686	0.216814	-3.86362	0.00011172	0.00133193
REEP3	74.7925	0.836752	0.269375	-3.10627	0.00189463	0.0143982
SIAH2	133.193	0.835825	0.220459	-3.79129	0.000149868	0.00172988
RHEB	127.953	0.83357	0.248878	-3.34931	0.00081012	0.00709435
WTAP	173.074	0.832745	0.173227	-4.80723	1.53033e-06	3.21924e-05
SFPQ	428.304	0.83235	0.197065	-4.22374	2.40285e-05	0.000364254
SAMD3	91.2495	0.8314	0.217456	-3.8233	0.000131676	0.00154447
GNPTAB	80.3683	0.831147	0.243371	-3.41514	0.000637483	0.00584712
MT1X	128.612	0.830819	0.273264	-3.04035	0.00236303	0.0170643
EHD4	45.6311	0.829599	0.284099	-2.92011	0.00349912	0.0237059
GPR171	216.785	0.829463	0.268313	-3.0914	0.00199218	0.0150411
ELF1	560.279	0.828634	0.145005	-5.71453	1.10005e-08	3.64967e-07
ATP6V0C	133.604	0.828117	0.180824	-4.57968	4.65682e-06	8.83578e-05
AC020915.5	31.4359	0.827562	0.291853	-2.83554	0.00457481	0.0292526
MRPL1	99.8788	0.826554	0.243963	-3.38804	0.000703947	0.00632681
AC058791.1	487.692	0.825036	0.186584	-4.42179	9.78844e-06	0.000168141
EIF4A1	676.413	0.824718	0.22173	-3.71946	0.000199646	0.0022079
ATP5ME	479.325	0.821873	0.168281	-4.88394	1.03989e-06	2.25283e-05
GLIPR2	113.693	0.820983	0.285786	-2.87272	0.00406957	0.0267284
STAU1	123.962	0.820429	0.204666	-4.00862	6.10756e-05	0.000807756
CD28	138.629	0.819718	0.203688	-4.02437	5.71278e-05	0.000765555
TMBIM1	57.4939	0.818479	0.277224	-2.95241	0.00315306	0.0217419
DYNLL2	104.553	0.818136	0.252293	-3.2428	0.0011836	0.00978911
CDC42SE2	152.382	0.815912	0.172111	-4.74061	2.13073e-06	4.31045e-05
HSPA8	1872.1	0.815621	0.192995	-4.22613	2.37747e-05	0.000362299
DDX3X	463.588	0.815473	0.218667	-3.72929	0.000192023	0.00213601
STAG2	136.682	0.812056	0.200134	-4.05756	4.95875e-05	0.00068386
AC020915.1	33.0318	0.811029	0.282585	-2.87004	0.00410425	0.0268953
CLIC1	866.586	0.809027	0.234521	-3.44969	0.000561223	0.00524446
PARP8	220.534	0.808345	0.160467	-5.03745	4.71786e-07	1.11349e-05
PRPS1	57.7336	0.807247	0.23147	-3.48748	0.000487589	0.00466383
EIF5	348.08	0.805611	0.157647	-5.11021	3.21805e-07	7.98462e-06
DNAAF4-CCPG1	18.5751	0.805107	0.371011	-2.17004	0.030004	0.117625
PRXL2C	59.2157	0.804658	0.234813	-3.42681	0.000610716	0.00565521
ZNF267	60.1643	0.80331	0.269462	-2.98116	0.00287154	0.0200454
ST8SIA4	54.3206	0.802979	0.25746	-3.11884	0.00181562	0.0138704
SUCO	64.3522	0.800364	0.220206	-3.63461	0.000278397	0.00295449
RNF145	98.8255	0.800063	0.218948	-3.65412	0.000258066	0.00277984
CD40LG	208.686	0.799977	0.280687	-2.85007	0.00437092	0.0283865
ARL4A	234.695	0.798273	0.194259	-4.10933	3.96809e-05	0.000560552
DDX3Y	142.59	0.796197	0.339424	-2.34573	0.0189899	0.085315
BOLA2	129.268	0.795027	0.21306	-3.73146	0.000190372	0.00212557
TAPT1	45.7069	0.79426	0.252135	-3.15014	0.00163192	0.012701
ARNTL	42.7258	0.792221	0.258768	-3.06151	0.00220222	0.016226
TUT7	68.0617	0.791676	0.259608	-3.04951	0.00229219	0.0166479
RALA	121.185	0.79078	0.201746	-3.91969	8.86644e-05	0.00110232
TXNRD1	42.5293	0.788164	0.353722	-2.2282	0.025867	0.106287
LYSMD3	38.9576	0.787547	0.27933	-2.81942	0.00481112	0.0303954
FAS	56.0391	0.786618	0.417274	-1.88514	0.0594114	0.19133
MAP4	57.7277	0.784042	0.288375	-2.71882	0.00655143	0.0383443
GLIPR1	234.025	0.782595	0.198837	-3.93586	8.28988e-05	0.00104305
SRRT	60.2421	0.782094	0.285232	-2.74196	0.00610741	0.0362944
AC093525.2	130.149	0.779476	0.182867	-4.26253	2.02128e-05	0.000317177
EPSTI1	59.1689	0.77916	0.31477	-2.47533	0.0133113	0.0652197
FOSB	638.348	0.778644	0.24678	-3.15522	0.00160376	0.012566
GOLGB1	152.611	0.778352	0.176561	-4.40841	1.04133e-05	0.000177823
BIRC2	81.2784	0.777878	0.21957	-3.54273	0.000396015	0.00393036
LPGAT1	69.2054	0.77726	0.240223	-3.23557	0.00121399	0.00994132
GNG5	228.422	0.776308	0.214183	-3.62451	0.00028951	0.00304863
SBDS	332.289	0.7752	0.231917	-3.34258	0.000830036	0.00720357
ISG15	245.31	0.774284	0.291191	-2.65903	0.00783669	0.0438764
HSPA9	175.661	0.773504	0.207586	-3.72619	0.000194397	0.00215395
ANTXR2	56.2946	0.773102	0.267154	-2.89385	0.00380552	0.0254843
ATXN1	62.6312	0.771239	0.251506	-3.06648	0.00216592	0.01604
SRA1	31.7611	0.771222	0.338203	-2.28035	0.0225869	0.0974291
RBM39	865.696	0.769704	0.163802	-4.69898	2.61466e-06	5.14602e-05
ZCCHC10	59.3864	0.769435	0.283781	-2.71137	0.00670065	0.038904
DOCK10	109.247	0.769038	0.20189	-3.80918	0.000139427	0.00161903
ASCC3	77.1324	0.768811	0.258881	-2.96975	0.00298041	0.0206988
DDX27	135.238	0.768288	0.198786	-3.8649	0.000111133	0.00132765
PGM2L1	37.5124	0.767086	0.269228	-2.8492	0.00438293	0.0284327
PRKX	88.6355	0.766801	0.205013	-3.74026	0.00018383	0.00207649
SRP54	76.9365	0.766712	0.238921	-3.20906	0.00133171	0.0107346
PPIA	736	0.762917	0.159994	-4.76841	1.85687e-06	3.78281e-05
WSB1	219.228	0.762101	0.185618	-4.10576	4.02991e-05	0.000567904
ELOC	138.595	0.761474	0.182526	-4.17187	3.02111e-05	0.000446619
POLR2L	535.681	0.760464	0.156753	-4.85136	1.2262e-06	2.62705e-05
STARD7	51.9114	0.760085	0.273174	-2.78242	0.00539552	0.0331891
C12orf75	64.9577	0.759772	0.247816	-3.06588	0.00217033	0.0160521
CBLB	67.4248	0.757281	0.262936	-2.88009	0.00397558	0.0262895
RIPK2	75.8946	0.756869	0.289002	-2.61891	0.00882115	0.0481949
CLDND1	65.7184	0.75686	0.226911	-3.33549	0.000851484	0.00734579
DAP	52.2267	0.756692	0.236628	-3.19781	0.00138476	0.0110742
OSTF1	217.759	0.756674	0.20493	-3.69236	0.000222183	0.00241572
FAM76B	64.922	0.755833	0.220899	-3.42162	0.000622487	0.00574246
SURF4	93.3632	0.755525	0.235799	-3.20411	0.0013548	0.0108776
CCNK	52.5122	0.754506	0.265876	-2.83781	0.00454244	0.0290776
MAP3K2	151.591	0.753599	0.193626	-3.89203	9.94091e-05	0.00119994
DHX36	270.554	0.752556	0.157478	-4.77879	1.76353e-06	3.6053e-05
GOLT1B	41.9233	0.7501	0.282712	-2.65323	0.00797251	0.0444653
PARVG	49.3168	0.749454	0.255935	-2.92831	0.00340815	0.0231978
PDCD4	506.407	0.74711	0.14689	-5.0862	3.65312e-07	8.94938e-06
AKIRIN1	263.86	0.744964	0.179773	-4.14392	3.41413e-05	0.000495561
MATK	72.0887	0.744569	0.275452	-2.70308	0.00686992	0.0396883
C4orf48	176.117	0.742955	0.206625	-3.59567	0.000323552	0.00333667
SMG1P1	18.2224	0.739809	0.36344	-2.03557	0.0417935	0.148411
IL2RG	272.991	0.738585	0.207627	-3.55727	0.00037473	0.00377068
ACSL3	45.231	0.738397	0.255814	-2.88646	0.00389603	0.0260303
DNAJB11	45.6205	0.737851	0.260514	-2.83229	0.00462153	0.0294561
COX8A	376.133	0.737247	0.190746	-3.86508	0.000111054	0.00132765
RIOK1	57.6672	0.736926	0.247935	-2.97225	0.00295621	0.0205554
PET100	293.162	0.736773	0.170508	-4.32106	1.55282e-05	0.00025254
BTAF1	46.2605	0.735829	0.259764	-2.83268	0.00461595	0.0294561
AC242843.1	23.5332	0.734591	0.346325	-2.1211	0.033913	0.129114
IL4R	57.717	0.732585	0.244048	-3.0018	0.00268387	0.0189569
CHIC2	91.7797	0.732167	0.204323	-3.58339	0.000339168	0.00346083
SMNDC1	92.3312	0.731429	0.216202	-3.38308	0.000716773	0.0064222
UBXN2A	57.8542	0.730803	0.31959	-2.28669	0.0222139	0.0961495
CD2	891.183	0.729336	0.256891	-2.83908	0.00452433	0.0290257
YWHAQ	296.966	0.728659	0.190613	-3.82272	0.000131988	0.001545
CBX4	73.6832	0.728225	0.230113	-3.16464	0.00155273	0.0121961
POLR2K	196.11	0.72818	0.200362	-3.63432	0.000278718	0.00295449
DYNLT3	67.8432	0.727078	0.224344	-3.2409	0.00119153	0.00981627
SENP3-EIF4A1	230.953	0.726033	0.188265	-3.85645	0.000115044	0.00136595
CD69	1670.82	0.72442	0.192728	-3.75878	0.000170747	0.00193624
HELB	59.7728	0.724359	0.275918	-2.62527	0.00865799	0.0475126
RAB27A	83.4756	0.723542	0.229635	-3.15084	0.00162803	0.012701
SLCO3A1	44.1971	0.723238	0.262976	-2.7502	0.0059558	0.0356936
DNAAF2	46.4389	0.720903	0.270748	-2.66264	0.00775309	0.0435343
C21orf91	40.1078	0.720828	0.313126	-2.30204	0.021333	0.0933832
SLC25A5	586.502	0.719412	0.159696	-4.50489	6.64071e-06	0.00012093
COQ10A	37.3447	0.71822	0.316128	-2.27193	0.0230908	0.0989412
EIF4G2	399.24	0.717403	0.167513	-4.28268	1.84653e-05	0.000295343
C16orf91	55.6089	0.71701	0.23429	-3.06035	0.00221077	0.0162477
NR1D2	83.4976	0.716878	0.204557	-3.50453	0.000457407	0.00442617
DNAJC3	112.932	0.716324	0.198611	-3.60667	0.000310155	0.00321564
MKNK2	101.963	0.715739	0.272842	-2.62328	0.00870889	0.0477468
ATG2A	37.3223	0.714734	0.276717	-2.5829	0.00979727	0.0520186
HNRNPH1	694.292	0.714588	0.19426	-3.67852	0.000234589	0.00253636
RPA3	153.64	0.713842	0.213595	-3.34204	0.000831643	0.00720675
AC023509.1	34.9891	0.712464	0.355701	-2.00299	0.0451787	0.157921
ADGRE5	217.242	0.712143	0.171214	-4.15937	3.19128e-05	0.000464375
PTPN7	84.6312	0.71209	0.256095	-2.78057	0.00542632	0.0332346
HMCES	85.6126	0.711663	0.211174	-3.37003	0.0007516	0.00665211
ITM2A	392.738	0.71099	0.213948	-3.32318	0.000889964	0.0076324
ODC1	174.652	0.710354	0.181751	-3.90839	9.29132e-05	0.00113847
RCHY1	44.679	0.708218	0.322792	-2.19404	0.0282329	0.112737
BOLA2B	100.909	0.707784	0.206887	-3.42111	0.000623651	0.00574246
YWHAE	153.739	0.707042	0.201742	-3.50469	0.000457147	0.00442617
IFI16	257.838	0.707041	0.237102	-2.98201	0.0028636	0.0200314
ST3GAL5	37.7794	0.70625	0.279403	-2.52771	0.011481	0.0584212
MNAT1	58.2868	0.704721	0.251273	-2.8046	0.0050379	0.0314855
SMARCA5	217.271	0.704145	0.168913	-4.16868	3.06366e-05	0.000450319
RC3H1	93.7786	0.703402	0.205117	-3.42927	0.000605208	0.00561316
ARF6	305.73	0.702382	0.160156	-4.38562	1.15655e-05	0.000195201
MXD4	157.697	0.701632	0.231681	-3.02844	0.00245819	0.0176201
DHRS7	244.912	0.701021	0.201094	-3.48604	0.000490227	0.00467426
KLF3	290.189	0.698994	0.222621	-3.13983	0.00169044	0.013096
EBP	53.8998	0.697491	0.245663	-2.83921	0.00452248	0.0290257
TRMT112	442.169	0.696114	0.166614	-4.17799	2.94091e-05	0.000436699
CIAO2B	232.328	0.695627	0.166224	-4.18487	2.85331e-05	0.000426967
MORF4L2	80.9841	0.69537	0.247934	-2.80466	0.00503704	0.0314855
TXNDC17	100.063	0.695128	0.277292	-2.50684	0.0121815	0.0608653
STRAP	192.037	0.695007	0.20845	-3.33416	0.000855566	0.00735914
RHOH	403.805	0.694642	0.153796	-4.51663	6.28302e-06	0.000115441
FMC1	29.0873	0.69345	0.329339	-2.10558	0.035241	0.131921
PPP4R2	125.374	0.693362	0.199707	-3.4719	0.000516792	0.0048868
COMMD4	42.7425	0.693159	0.328583	-2.10954	0.0348979	0.131314
LPAR2	73.7084	0.693051	0.221554	-3.12813	0.00175922	0.0135464
TOPORS	74.1888	0.692541	0.231313	-2.99396	0.0027538	0.0193566
AL121944.1	33.561	0.692422	0.352985	-1.96162	0.049807	0.168725
SNHG9	98.3978	0.692359	0.213665	-3.24039	0.00119364	0.00981627
ANKHD1	70.5712	0.690933	0.221918	-3.11346	0.00184909	0.0140705
OAZ1	976.179	0.689695	0.163233	-4.22523	2.38699e-05	0.000362798
RBPJ	150.709	0.688409	0.264507	-2.60261	0.00925175	0.0500146
OTULINL	35.9145	0.686531	0.299971	-2.28866	0.0220994	0.0958246
NFAT5	37.8088	0.685466	0.269939	-2.53934	0.0111062	0.0569635
SRSF3	720.772	0.684464	0.165233	-4.14243	3.43647e-05	0.00049756
MAP3K13	37.6981	0.683163	0.286997	-2.38039	0.0172945	0.0799458
CTR9	69.4962	0.682237	0.331356	-2.05893	0.0395011	0.142659
CD8A	121.206	0.682051	0.316572	-2.15449	0.031202	0.121258
CIB1	560.325	0.680499	0.194764	-3.49396	0.000475916	0.00457479
PRDX1	381.08	0.678823	0.223057	-3.04327	0.00234023	0.0169419
NDUFA3	355.189	0.677798	0.152025	-4.45847	8.25478e-06	0.000144919
NFATC1	31.0778	0.677467	0.307373	-2.20406	0.0275204	0.111192
TERF2IP	227.663	0.677209	0.190477	-3.55533	0.0003775	0.00379199
SARAF	2833.88	0.676839	0.152579	-4.43599	9.16508e-06	0.000158843
AHSA1	129.809	0.676491	0.31719	-2.13276	0.0329445	0.126255
NRBF2	87.6553	0.676442	0.260128	-2.60042	0.00931104	0.0502415
IRF1	499.885	0.676103	0.148782	-4.54424	5.51331e-06	0.000102597
PSENEN	48.3156	0.675915	0.251585	-2.68662	0.0072179	0.0412066
AGO2	100.677	0.675595	0.208161	-3.24554	0.00117228	0.00972322
PIP4K2A	266.121	0.675397	0.168561	-4.00684	6.15364e-05	0.000812001
CERK	88.4779	0.675357	0.215356	-3.13601	0.00171265	0.0132351
MAP7D3	42.9753	0.674872	0.280015	-2.41013	0.0159468	0.0750909
KTN1	277.437	0.674655	0.197261	-3.42012	0.000625939	0.00575032
CBWD5	82.772	0.673225	0.229639	-2.93167	0.00337146	0.0230291
HSPB11	95.8232	0.67312	0.201331	-3.34336	0.000827718	0.00720357
PPP4R3A	110.557	0.671211	0.215102	-3.12043	0.00180585	0.0138504
CD99_ENSG00000002586	703.137	0.671133	0.171134	-3.92169	8.79303e-05	0.0010979
MAP2K3	59.8053	0.670815	0.272704	-2.45986	0.0138991	0.0677482
CDKN2AIP	100.684	0.670355	0.222935	-3.00695	0.00263887	0.0187302
TPD52	40.2661	0.670011	0.274767	-2.43847	0.0147495	0.0707016
CHD4	65.2004	0.669424	0.27494	-2.4348	0.0148999	0.0709088
NDUFB1	348.486	0.666622	0.189351	-3.52056	0.000430636	0.00423058
TYMP	79.7761	0.665902	0.263664	-2.52557	0.0115511	0.0586239
HIGD1A	35.303	0.665567	0.300506	-2.21482	0.0267725	0.109005
NEK7	56.5305	0.663803	0.26177	-2.53582	0.0112184	0.0574882
ZFAND3	43.3016	0.663558	0.261897	-2.53366	0.0112879	0.0576916
CCSER2	225.805	0.662738	0.161923	-4.09291	4.25994e-05	0.000595981
TSPYL4	67.0531	0.662521	0.280732	-2.35998	0.018276	0.0834856
CRIP1	1342.23	0.662251	0.186029	-3.55994	0.000370939	0.00374552
AC091021.1	65.3291	0.661684	0.221758	-2.98382	0.00284676	0.0199617
MAPK1IP1L	116.004	0.657899	0.239397	-2.74814	0.00599337	0.0357999
TRIM39-RPP21	62.5963	0.656844	0.234617	-2.79964	0.00511598	0.0318023
STK26	53.8228	0.656716	0.237592	-2.76405	0.00570891	0.0346352
ELOVL1	48.3374	0.655965	0.274384	-2.39069	0.0168169	0.0780359
PGRMC1	46.6922	0.655433	0.306611	-2.13767	0.0325435	0.125073
DBNDD2	29.415	0.654114	0.341727	-1.91414	0.055602	0.181976
ERVK3-1	52.948	0.65366	0.240119	-2.72223	0.0064843	0.0380666
SUB1	916.25	0.653627	0.176059	-3.71254	0.000205192	0.00225552
NDUFA6	200.848	0.652728	0.202701	-3.22015	0.00128122	0.0103893
LYAR	254.256	0.651559	0.174134	-3.74171	0.000182772	0.00206857
VTI1A	38.6601	0.650635	0.28735	-2.26426	0.023558	0.0996197
UBAP2	52.5585	0.649869	0.255893	-2.53961	0.0110976	0.0569635
PDIA3	413.391	0.649755	0.158912	-4.08877	4.33675e-05	0.000605268
EMB	307.966	0.64853	0.183201	-3.53999	0.000400136	0.00395773
ATP5IF1	476.679	0.648014	0.143368	-4.51995	6.18541e-06	0.000114008
CALU	31.6298	0.645331	0.346249	-1.86378	0.0623532	0.197395
DERL1	92.5658	0.644147	0.200012	-3.22054	0.00127951	0.0103893
MRPS6	83.9451	0.643058	0.292496	-2.19852	0.0279124	0.112229
COMMD1	79.2003	0.642506	0.22335	-2.87667	0.0040189	0.0264855
COX6A1	461.002	0.64222	0.161038	-3.988	6.66321e-05	0.000861617
UQCRQ	379.962	0.641666	0.164463	-3.90158	9.55654e-05	0.00116078
GPRIN3	138.914	0.641623	0.210334	-3.05049	0.00228468	0.0166226
GSK3B	56.3739	0.641475	0.258901	-2.47768	0.0132239	0.0649009
NARF	39.8125	0.640705	0.287354	-2.22967	0.0257694	0.106036
COMMD5	32.6089	0.639929	0.292955	-2.18439	0.0289334	0.114746
SYS1-DBNDD2	29.5244	0.639595	0.339731	-1.88265	0.0597477	0.191927
CAST	410.174	0.639023	0.222733	-2.869	0.00411767	0.0269529
MXI1	127.557	0.638762	0.22102	-2.89007	0.00385159	0.025763
HOXB2	40.2511	0.637451	0.332001	-1.92003	0.054854	0.180137
CDV3	389.221	0.63639	0.171966	-3.70068	0.000215024	0.00234667
RSRC2	279.261	0.635699	0.152755	-4.16156	3.16081e-05	0.000462259
SRPRA	142.662	0.634202	0.18363	-3.45369	0.000552969	0.00518665
TSEN54	67.4472	0.633333	0.227623	-2.78238	0.00539624	0.0331891
KMT2E-AS1	44.9705	0.633039	0.2951	-2.14517	0.0319391	0.123215
SIK3	50.8999	0.63289	0.254207	-2.48967	0.0127863	0.0632675
SNTB2	49.7538	0.632324	0.2729	-2.31705	0.0205008	0.0907917
COX7B	531.395	0.630699	0.161374	-3.90831	9.29445e-05	0.00113847
HDGF	102.633	0.63056	0.222733	-2.83101	0.00464007	0.0295397
LUC7L	62.4736	0.630452	0.230392	-2.73644	0.00621084	0.0367211
CLINT1	151.426	0.630422	0.188195	-3.34983	0.000808619	0.0070919
DUSP28	40.2358	0.630159	0.280495	-2.24659	0.0246661	0.102826
STAT3	182.662	0.629992	0.185016	-3.40506	0.000661491	0.00601036
ING1	58.9014	0.629693	0.31745	-1.9836	0.0473007	0.16231
ZCCHC2	42.4599	0.628996	0.281566	-2.23392	0.0254883	0.105403
CHCHD3	74.0259	0.628864	0.236062	-2.66398	0.00772232	0.0434035
SHOC2	54.1717	0.626367	0.244917	-2.55747	0.0105438	0.0548881
CDK5RAP1	47.2657	0.626341	0.281316	-2.22647	0.0259828	0.106462
SNRPG	359.169	0.625769	0.186984	-3.34664	0.000817984	0.00715243
TRAF3	41.6156	0.625365	0.26636	-2.34782	0.0188837	0.0849255
DNM2	46.2156	0.625099	0.261401	-2.39134	0.0167871	0.0780359
PPM1A	47.57	0.625006	0.255993	-2.4415	0.0146265	0.0702475
ATP5MD	732.486	0.62436	0.168118	-3.71381	0.000204159	0.00224924
TOP1	200.932	0.623516	0.229182	-2.72061	0.00651615	0.0382149
PLCL2	61.181	0.622427	0.240513	-2.58792	0.00965586	0.0515275
LCP1	469.329	0.618595	0.2103	-2.94149	0.00326642	0.0224436
PPP2R5A	94.4066	0.618522	0.246654	-2.50765	0.0121537	0.0607789
RAB21	146.587	0.618354	0.200444	-3.08492	0.00203605	0.0152533
KLF6	521.84	0.617684	0.160143	-3.85707	0.000114755	0.00136531
EMD	113.198	0.617202	0.196585	-3.13961	0.0016917	0.013096
DEDD2	116.631	0.616787	0.28574	-2.15855	0.0308847	0.120185
HNRNPDL	945.153	0.616593	0.140774	-4.38003	1.18663e-05	0.000199121
POLE3	141.327	0.615539	0.222321	-2.7687	0.00562811	0.0342883
GNL3	138.468	0.615337	0.281284	-2.1876	0.028699	0.114128
ARIH2	88.5394	0.614943	0.237489	-2.58935	0.00961566	0.0513602
LRRC59	29.4489	0.614937	0.301132	-2.04209	0.0411428	0.146864
CDYL	34.8939	0.613411	0.27622	-2.22073	0.0263691	0.10774
AGTPBP1	43.9451	0.613206	0.263459	-2.32752	0.0199375	0.0888388
RNF166	76.0986	0.612865	0.244081	-2.51091	0.0120419	0.0603435
CBWD3	72.5045	0.612311	0.260698	-2.34873	0.0188374	0.0848489
MOB4	110.867	0.612212	0.264175	-2.31745	0.0204793	0.0907917
CCDC6	50.8146	0.610455	0.241741	-2.52524	0.0115618	0.0586269
YME1L1	324.16	0.608687	0.193173	-3.151	0.00162714	0.012701
RAP2C	55.7824	0.607332	0.278964	-2.1771	0.0294735	0.116094
GYG1	37.8045	0.606863	0.29068	-2.08773	0.036822	0.135825
UBALD2	452.086	0.602381	0.186239	-3.23444	0.00121881	0.00996678
SNRK	85.4238	0.601828	0.214249	-2.80901	0.00496936	0.0311882
CAMTA1	75.089	0.601611	0.222362	-2.70555	0.0068191	0.0394732
TMSB4XP4	30.7049	0.600905	0.297936	-2.01689	0.0437067	0.153794
EIF1AX	284.845	0.600036	0.173482	-3.45878	0.000542621	0.00510609
EIF3J	113.741	0.5991	0.245386	-2.44146	0.0146278	0.0702475
MAP2K1	65.5762	0.598524	0.223778	-2.67463	0.00748114	0.0423348
LRRFIP2	51.8332	0.597881	0.239702	-2.49427	0.0126216	0.0625798
COPB1	90.2031	0.597746	0.249405	-2.39669	0.0165439	0.0772138
SLC4A7	121.965	0.596672	0.22269	-2.67939	0.00737569	0.041868
RANBP9	45.0799	0.595714	0.287681	-2.07074	0.0383827	0.140334
FAM107B	554.839	0.59532	0.147943	-4.02397	5.72254e-05	0.000765555
CDK6	90.3638	0.593268	0.228443	-2.59701	0.00940398	0.0505551
HCG18	29.6573	0.593078	0.312044	-1.90063	0.0573511	0.186335
STRN3	39.4746	0.592269	0.268265	-2.20778	0.0272599	0.110602
GCLM	61.3936	0.591591	0.284103	-2.08231	0.037314	0.137378
UBE2J1	62.1427	0.591407	0.260572	-2.26964	0.0232292	0.0991295
ZNF791	88.4854	0.59062	0.245315	-2.40759	0.0160581	0.0754317
PDXK	43.2551	0.59043	0.273029	-2.16252	0.0305781	0.119317
Z99127.4	73.8912	0.589416	0.22783	-2.58709	0.00967898	0.0516035
FNIP1	30.2649	0.588992	0.303198	-1.9426	0.0520646	0.173815
SDE2	38.379	0.588491	0.292058	-2.01498	0.0439066	0.154218
SRPK1	87.6252	0.588457	0.28069	-2.09646	0.0360413	0.134215
HNRNPUL1	207.932	0.588164	0.165791	-3.54763	0.00038871	0.0038711
BRD9	108.31	0.587306	0.213705	-2.74822	0.00599206	0.0357999
YWHAG	38.202	0.587225	0.295474	-1.9874	0.0468778	0.161527
ABI1	94.7065	0.586928	0.210669	-2.78602	0.00533589	0.0329909
KDM6A	35.7432	0.586684	0.295517	-1.98528	0.0471136	0.162051
FRAT2	70.0302	0.584203	0.232704	-2.51049	0.0120562	0.0603435
BORCS5	72.6939	0.583109	0.264282	-2.20639	0.0273567	0.110845
ASXL1	87.358	0.58247	0.211797	-2.75013	0.00595714	0.0356936
RAB33B	37.4797	0.582404	0.272406	-2.138	0.0325168	0.125073
GNB5	70.8565	0.582359	0.252213	-2.309	0.0209438	0.0922082
PTGES3	681.768	0.581929	0.167175	-3.48096	0.000499616	0.00474758
ARPP19	93.2649	0.581881	0.217732	-2.67247	0.00752961	0.0424848
NOM1	50.4116	0.581365	0.268496	-2.16526	0.0303674	0.118809
LSR	50.3965	0.581266	0.24604	-2.36249	0.0181527	0.0830532
C17orf49	47.305	0.581222	0.255657	-2.27345	0.0229993	0.0986947
FYTTD1	102.371	0.580825	0.200515	-2.89666	0.00377156	0.0253152
SLC25A24	49.0923	0.580441	0.249222	-2.32901	0.0198586	0.0885552
TTC39C	177.697	0.580218	0.18615	-3.11693	0.00182742	0.0139239
MAPRE1	117.558	0.579948	0.189657	-3.05787	0.00222916	0.0163415
CGRRF1	55.4594	0.579037	0.259327	-2.23285	0.0255591	0.10541
FOXN3	38.6881	0.578925	0.274542	-2.1087	0.0349707	0.131503
MIF	1057.73	0.577396	0.160906	-3.58842	0.000332693	0.00341879
PAK2	350.902	0.573557	0.176465	-3.25027	0.00115296	0.00957667
TFDP1	59.6073	0.57346	0.247007	-2.32164	0.0202526	0.0900355
SOS1	62.3063	0.572745	0.305458	-1.87504	0.0607876	0.193919
SUDS3	80.6959	0.572178	0.212033	-2.69853	0.00696455	0.040195
LINC00869	86.0487	0.571818	0.206949	-2.76309	0.00572567	0.0347007
TBC1D1	45.1156	0.570334	0.272395	-2.09378	0.0362799	0.134681
IFITM2	2415.14	0.570162	0.177966	-3.20377	0.00135642	0.0108776
OSER1	77.1581	0.570149	0.288901	-1.97351	0.0484377	0.165041
RAB5IF	160.6	0.570086	0.222718	-2.55967	0.0104772	0.0546546
BAX	263.368	0.57008	0.160405	-3.55399	0.000379427	0.00380476
VRK1	50.2454	0.569566	0.269248	-2.1154	0.034396	0.130269
ZRANB1	39.4521	0.569185	0.285272	-1.99524	0.0460171	0.159508
MGAT2	61.4874	0.567975	0.254813	-2.22899	0.0258145	0.106147
HERC2	50.3095	0.567584	0.250652	-2.26443	0.0235477	0.0996197
COMTD1	67.3697	0.5668	0.24204	-2.34176	0.0191931	0.0860505
GLCCI1	29.8948	0.566632	0.302699	-1.87193	0.061216	0.19482
GNAI3	129.618	0.56645	0.205774	-2.75278	0.00590917	0.0355918
CHMP2B	91.128	0.566063	0.211317	-2.67874	0.00738998	0.0419006
ARPC3	720.909	0.565689	0.168459	-3.35802	0.000785038	0.00691644
COX20	185.352	0.565549	0.196267	-2.88153	0.00395755	0.02623
MED31	49.5829	0.564397	0.289501	-1.94955	0.0512301	0.171634
COPA	89.3043	0.564021	0.231621	-2.4351	0.0148877	0.0709088
ARL6IP6	55.5868	0.563084	0.23638	-2.38211	0.0172137	0.0796993
DHRS3	60.6098	0.562908	0.271539	-2.07303	0.0381697	0.139643
TRAPPC2B	31.48	0.562631	0.291891	-1.92754	0.0539127	0.17811
LAP3	61.4246	0.562373	0.266762	-2.10815	0.0350183	0.131596
SRGAP2B	34.0066	0.562291	0.298709	-1.8824	0.0597814	0.191927
TMCO1	175.721	0.561783	0.228404	-2.4596	0.013909	0.0677482
MCUR1	51.0459	0.561769	0.287513	-1.95389	0.0507144	0.170741
CAPN2	172.396	0.560673	0.203033	-2.76149	0.00575381	0.0348349
GKAP1	49.9033	0.560616	0.2545	-2.20281	0.0276078	0.111468
AP3B1	57.0586	0.560553	0.242157	-2.31484	0.0206219	0.0911886
ATP2B1	156.064	0.559392	0.182142	-3.07118	0.00213214	0.0158708
CHRAC1	91.9474	0.558909	0.25097	-2.22699	0.0259478	0.106462
RDX	36.7517	0.558244	0.282182	-1.97831	0.0478932	0.163721
GSR	43.0545	0.557449	0.289885	-1.923	0.0544799	0.179416
ZNRD1	145.35	0.55711	0.236828	-2.35238	0.0186536	0.0844138
DNAJC15	154.223	0.556786	0.193484	-2.87768	0.0040061	0.0264543
TULP4	43.2987	0.556714	0.274165	-2.03058	0.0422974	0.149743
TRIM22	138.975	0.556485	0.215877	-2.57779	0.00994355	0.0524839
KLHL6	45.3503	0.556382	0.277097	-2.0079	0.0446543	0.156465
SOS2	48.6217	0.555255	0.25494	-2.17799	0.0294069	0.11599
TRAPPC10	116.625	0.554229	0.189878	-2.91886	0.0035131	0.0237728
CHST11	101.355	0.554057	0.232109	-2.38705	0.016984	0.0786985
RAP2B	158.707	0.552796	0.217308	-2.54384	0.0109643	0.0563351
CORO1B	1296.12	0.552538	0.167114	-3.30635	0.00094519	0.00803481
HNRNPA1P48	208.566	0.552164	0.219462	-2.51599	0.0118697	0.059719
ASAP1	59.9769	0.55197	0.229806	-2.40189	0.0163106	0.0763088
TAF1D	494.338	0.551844	0.170168	-3.24294	0.00118305	0.00978911
H1FX	709.776	0.551568	0.202783	-2.71999	0.00652836	0.0382479
BUB3	244.147	0.551295	0.162154	-3.39983	0.000674289	0.00609801
LPP	72.5335	0.550574	0.239064	-2.30304	0.0212764	0.0933014
ITGA4	247.673	0.549963	0.195642	-2.81107	0.00493769	0.0310401
APOBEC3G	107.062	0.5497	0.237795	-2.31166	0.0207965	0.0918908
STAM	41.5055	0.549004	0.276314	-1.98688	0.0469353	0.161533
PAXBP1	67.4764	0.548316	0.227799	-2.40702	0.0160833	0.0754317
WIPF1	161.006	0.547528	0.208349	-2.62794	0.00859048	0.0473659
C1orf52	85.8672	0.547388	0.206077	-2.65623	0.00790194	0.0441565
DESI2	56.6411	0.546783	0.25966	-2.10577	0.0352247	0.131921
TMEM170A	51.1543	0.543108	0.242825	-2.23662	0.0253109	0.104928
HSP90B1	374.589	0.542198	0.163369	-3.31885	0.000903893	0.00771012
CDC73	96.0949	0.542025	0.207381	-2.61367	0.00895768	0.0487396
ITPKB	72.5673	0.541811	0.222813	-2.43169	0.0150286	0.0712229
NRDC	96.9101	0.541406	0.207177	-2.61325	0.00896848	0.0487396
MGAT5	44.9214	0.541271	0.275401	-1.96539	0.0493691	0.167485
TMEM50A	276.991	0.539881	0.202832	-2.66172	0.0077743	0.0435691
NOP10	236.156	0.539657	0.2746	-1.96525	0.0493858	0.167485
SENP7	90.1379	0.53942	0.24227	-2.22652	0.0259792	0.106462
CD82	68.4272	0.538886	0.275854	-1.95352	0.0507577	0.170741
USP3	117.708	0.538663	0.234308	-2.29895	0.0215077	0.0938901
UBE2G1	82.4608	0.538656	0.221345	-2.43356	0.0149512	0.0710946
RBM6	82.4496	0.53852	0.251391	-2.14216	0.0321804	0.123981
APMAP	81.1605	0.538504	0.21763	-2.4744	0.0133462	0.0653354
RBM22	99.7995	0.537921	0.224174	-2.39956	0.0164147	0.0767339
ACAA2	68.0611	0.536447	0.240019	-2.23502	0.025416	0.105178
DCAF13	59.4071	0.535153	0.265301	-2.01715	0.0436796	0.153792
CNOT1	81.3287	0.534183	0.207604	-2.57308	0.0100797	0.0529617
MIA2	56.2709	0.53256	0.242708	-2.19424	0.0282182	0.112737
PHPT1	184.341	0.53109	0.236245	-2.24804	0.0245734	0.102626
PRKAR1A	56.5206	0.530414	0.251112	-2.11226	0.0346639	0.130698
HMGXB3	50.4654	0.530377	0.277269	-1.91286	0.0557659	0.182307
ZC3HAV1	396.202	0.527763	0.169315	-3.11705	0.00182668	0.0139239
RBBP7	74.4751	0.526984	0.22033	-2.39179	0.0167663	0.0780359
SOD1	921.835	0.526943	0.180438	-2.92035	0.00349637	0.0237059
SPOCK2	623.706	0.526311	0.150139	-3.50549	0.000455763	0.00442617
LUC7L2	125.915	0.526225	0.198541	-2.65046	0.00803832	0.0447269
AL499604.1	54.6034	0.525029	0.251835	-2.08481	0.0370861	0.136626
CHD7	50.9421	0.524769	0.25704	-2.04159	0.0411924	0.146864
ARHGAP9	109.862	0.524627	0.222744	-2.35528	0.0185085	0.0840848
AC044849.1	379.046	0.521943	0.242629	-2.15119	0.0314611	0.122019
ENY2	228.174	0.520984	0.165272	-3.15228	0.00161998	0.0126761
OSTM1	57.2289	0.520769	0.234391	-2.22179	0.0262973	0.107523
SSH2	67.6149	0.518912	0.262445	-1.97722	0.0480166	0.163873
PHACTR4	63.2814	0.518118	0.232571	-2.22778	0.025895	0.106327
NFKBIZ	204.298	0.517753	0.232036	-2.23134	0.0256583	0.105729
TMBIM6	651.574	0.517246	0.15474	-3.34268	0.000829732	0.00720357
CD44	476.253	0.516735	0.144475	-3.57664	0.000348038	0.0035451
DOCK2	100.265	0.516477	0.212042	-2.43573	0.0148616	0.0709011
UPP1	335.245	0.515945	0.170188	-3.03162	0.00243244	0.0174571
FBXW7	91.7881	0.515767	0.218581	-2.35961	0.018294	0.0835025
NDUFA1	653.697	0.515138	0.142453	-3.61619	0.000298974	0.00312764
CDC37	308.513	0.514735	0.151745	-3.39211	0.000693558	0.00625279
SAR1A	112.586	0.513389	0.2017	-2.54532	0.0109179	0.0561464
CDK11B	121.815	0.512764	0.240715	-2.13017	0.0331576	0.126569
SLC35D2	44.7631	0.512572	0.271906	-1.8851	0.0594158	0.19133
CCDC186	132.907	0.51256	0.194507	-2.63518	0.00840938	0.0465442
HIPK1	83.9991	0.511683	0.243323	-2.10289	0.035475	0.132468
SUPT3H	82.9884	0.511417	0.234245	-2.18326	0.0290169	0.114998
PAIP1	66.1062	0.510484	0.235146	-2.17093	0.0299366	0.11744
FAM241A	63.159	0.509262	0.227023	-2.24322	0.0248828	0.103414
CSNK1E	38.2342	0.508334	0.273878	-1.85606	0.0634449	0.199983
RABGGTB	97.1213	0.507724	0.210917	-2.40722	0.0160744	0.0754317
SUCLG2	49.1827	0.507708	0.248697	-2.04147	0.0412038	0.146864
FAF1	71.4648	0.507583	0.218618	-2.32178	0.0202446	0.0900355
SETD3	45.9868	0.507559	0.263367	-1.92719	0.0539559	0.17811
ANXA5	217.474	0.505984	0.241805	-2.09253	0.036391	0.134785
RASSF5	163.393	0.503577	0.192602	-2.61459	0.00893335	0.0486558
DNM1L	57.3742	0.502288	0.237348	-2.11625	0.0343231	0.130163
R3HDM2	174.112	0.502141	0.221392	-2.26811	0.0233226	0.0991295
NIPA2	55.4286	0.501641	0.242916	-2.06508	0.038915	0.141569
KIAA1109	86.2169	0.501229	0.218414	-2.29486	0.0217411	0.0945534
GCHFR	143.451	0.501062	0.212854	-2.35402	0.0185718	0.0842406
TIMM17A	46.7174	0.500197	0.257517	-1.94238	0.0520906	0.173815
ZMYM5	66.9318	0.497442	0.26808	-1.85557	0.063515	0.199983
CXCR4	1684.93	0.49669	0.239356	-2.07511	0.0379761	0.139198
FAM214A	40.5828	0.493556	0.264336	-1.86715	0.06188	0.196432
CALR	575.639	0.493137	0.178881	-2.75678	0.0058373	0.0352301
SFMBT1	50.9674	0.493091	0.243338	-2.02637	0.0427274	0.151081
RNASEK-C17orf49	480.475	0.49117	0.192337	-2.5537	0.0106586	0.0553481
SETD2	106.09	0.490924	0.232521	-2.11131	0.0347457	0.130911
CTSD	63.757	0.490821	0.231886	-2.11665	0.0342898	0.130122
EED	44.3436	0.49058	0.257264	-1.90691	0.0565324	0.184397
LITAF	378.353	0.490117	0.159085	-3.08085	0.00206408	0.0154434
RSRP1	316.926	0.488819	0.19622	-2.49118	0.012732	0.0630732
CMTM6	190.114	0.488342	0.230468	-2.11891	0.0340981	0.129499
UGP2	318.778	0.488203	0.179288	-2.72301	0.00646897	0.038015
IL10RA	182.028	0.488035	0.215159	-2.26826	0.0233136	0.0991295
IQGAP2	223.37	0.485378	0.173318	-2.80051	0.00510227	0.0317511
BUD31	148.2	0.485196	0.215649	-2.24993	0.0244533	0.102362
PDHA1	55.5479	0.484398	0.245767	-1.97097	0.0487275	0.165931
MALT1	169.571	0.482693	0.175605	-2.74874	0.00598251	0.0357999
HMGB1P6	60.8088	0.482575	0.241732	-1.99632	0.0458991	0.159289
FAM49B	176.293	0.482345	0.168208	-2.86756	0.00413657	0.0270461
SERF2	2185.66	0.481901	0.141255	-3.41156	0.000645913	0.00590578
CD63	262.615	0.481183	0.16802	-2.86385	0.0041853	0.0273032
LRRC75A	186.376	0.477665	0.201902	-2.36582	0.01799	0.0825872
MTHFS	60.5283	0.477564	0.245247	-1.94728	0.0515014	0.172344
CD81	374.339	0.477399	0.171459	-2.78434	0.00536376	0.0330945
IQGAP1	184.578	0.475147	0.189639	-2.50553	0.0122269	0.06104
GNL1	63.9058	0.473787	0.253971	-1.86552	0.0621089	0.196836
ANP32E	227.66	0.473334	0.216372	-2.1876	0.028699	0.114128
PARP15	48.9406	0.472887	0.245963	-1.92259	0.0545314	0.179484
DRAP1	349.206	0.472017	0.174972	-2.69766	0.00698277	0.0402602
NOP58	174.634	0.469711	0.173084	-2.71378	0.00665209	0.0386607
COQ10B	104.025	0.467797	0.212021	-2.20637	0.0273582	0.110845
RNASEK	241.025	0.467043	0.168781	-2.76716	0.00565467	0.0343565
TOR1AIP2	47.0978	0.466579	0.251314	-1.85655	0.0633746	0.199983
NCL	890.433	0.465259	0.154519	-3.01101	0.00260382	0.018504
RBMX	134.554	0.464912	0.182075	-2.55341	0.0106673	0.0553481
AFG3L2	68.6928	0.464863	0.220592	-2.10734	0.0350878	0.131648
DOCK8	169.869	0.464182	0.231053	-2.00899	0.0445385	0.156154
PBDC1	84.2483	0.463896	0.237243	-1.95536	0.0505402	0.170404
SEC61B	438.123	0.462677	0.188331	-2.45672	0.014021	0.0681793
MDFIC	288.122	0.462282	0.166326	-2.77937	0.0054465	0.0333218
CHMP5	127.056	0.460183	0.204425	-2.25111	0.0243786	0.102196
VPS26A	70.9917	0.458921	0.244695	-1.87548	0.0607269	0.193832
C1orf122	102.078	0.45849	0.202845	-2.2603	0.0238027	0.100435
ETHE1	120.005	0.458048	0.225159	-2.03434	0.0419178	0.148762
PPP2R5C	167.998	0.457791	0.196533	-2.32934	0.0198413	0.088546
HECA	166.142	0.456366	0.177595	-2.5697	0.0101786	0.0534333
TMEM258	542.781	0.456308	0.152222	-2.99765	0.0027207	0.0191703
SP140	87.9389	0.455697	0.238162	-1.91339	0.0556981	0.182188
AC008875.3	126.287	0.453181	0.198169	-2.28685	0.0222047	0.0961495
DEK	440.126	0.451151	0.185521	-2.43181	0.0150237	0.0712229
DNAJC21	167.422	0.450818	0.183487	-2.45694	0.0140124	0.0681793
SNHG8	1079.92	0.449942	0.176666	-2.54686	0.0108698	0.0559846
SNRPD3	203.403	0.449141	0.21434	-2.09546	0.0361298	0.134295
ORAI1	168.146	0.447294	0.197148	-2.26882	0.0232791	0.0991295
DPY30	79.0295	0.447248	0.213191	-2.09788	0.0359159	0.133843
TARSL2	141.98	0.445969	0.210969	-2.11391	0.0345227	0.130409
IER3IP1	90.031	0.445637	0.215919	-2.0639	0.0390268	0.141726
SNRPB	371.139	0.444283	0.192763	-2.30482	0.0211769	0.0930494
SERINC1	116.112	0.444256	0.187696	-2.36689	0.0179384	0.0824627
PLEKHA3	101.803	0.440334	0.205127	-2.14664	0.0318218	0.12298
TUT4	123.291	0.439909	0.196981	-2.23325	0.0255324	0.10541
RTN3	68.2598	0.439588	0.219786	-2.00007	0.0454923	0.158442
AC124319.1	371.892	0.439577	0.187125	-2.34911	0.0188185	0.0848489
CHD2	189.285	0.436044	0.201638	-2.1625	0.0305794	0.119317
QKI	86.6107	0.435213	0.204781	-2.12526	0.0335646	0.127955
MORF4L1	513.656	0.435126	0.147193	-2.95617	0.00311485	0.0215295
DIP2A	69.9306	0.435007	0.219802	-1.97909	0.0478059	0.16356
CCDC82	100.062	0.432043	0.228275	-1.89264	0.0584057	0.189126
HNRNPU	676.158	0.429475	0.163784	-2.62221	0.00873624	0.0478515
SPCS3	228.113	0.426441	0.172612	-2.47052	0.0134919	0.065993
COPS9	402.472	0.426202	0.154372	-2.76087	0.00576471	0.0348645
NRBP1	88.4098	0.425288	0.221928	-1.91634	0.0553221	0.181469
FYN	380.966	0.424062	0.168026	-2.52379	0.0116098	0.0587288
BAG1	106.787	0.422026	0.222942	-1.89298	0.05836	0.189084
TCP1	139.321	0.421904	0.225323	-1.87244	0.0611458	0.19482
PABPC1	1393.72	0.420109	0.164248	-2.55776	0.0105348	0.0548881
SMAP1	156.074	0.418816	0.185643	-2.25603	0.0240687	0.101263
HNRNPL	88.0085	0.417119	0.214572	-1.94395	0.051901	0.173482
CHCHD7	143.447	0.416198	0.201116	-2.06945	0.0385043	0.14053
CSNK2B	152.1	0.415839	0.183615	-2.26474	0.0235288	0.0996197
ATP6V0B	193.036	0.415518	0.1932	-2.15071	0.031499	0.122085
PHF20L1	128.243	0.41019	0.20589	-1.99228	0.0463404	0.16031
KMT2E	423.92	0.409735	0.158223	-2.58961	0.00960852	0.0513602
HNRNPA2B1	1162.66	0.408136	0.135036	-3.02244	0.0025075	0.0179072
CD5	112.859	0.407765	0.208259	-1.95798	0.0502329	0.169768
SEC61G	489.412	0.407282	0.167935	-2.42523	0.0152988	0.0723661
PPDPF	1146.94	0.407121	0.146293	-2.78291	0.00538735	0.0331891
TAGLN2	440.062	0.406038	0.157767	-2.57365	0.0100631	0.0529224
BIRC3	289.724	0.404824	0.196248	-2.06282	0.0391298	0.141992
PPP1R14B	134.173	0.40435	0.19483	-2.0754	0.0379495	0.139188
CBX3	302.768	0.403247	0.165481	-2.43682	0.0148169	0.070804
HCST	1459.34	0.403093	0.136578	-2.95137	0.00316367	0.0217892
RHOA	519.101	0.402683	0.154105	-2.61305	0.00897394	0.0487396
METAP2	157.605	0.399823	0.173948	-2.29852	0.0215322	0.0939263
MICOS10	349.698	0.399227	0.169848	-2.35049	0.0187486	0.0847115
POLR2F	126.854	0.398242	0.193431	-2.05883	0.0395101	0.142659
NDUFA7	93.8922	0.397024	0.205585	-1.93119	0.0534595	0.17725
SEM1	330.3	0.396328	0.188453	-2.10306	0.0354605	0.132468
PRDM1	286.862	0.395847	0.194235	-2.03798	0.0415515	0.147914
PITPNC1	119.03	0.395171	0.202441	-1.95203	0.0509343	0.17084
SUMO1	327.985	0.395127	0.174161	-2.26874	0.0232839	0.0991295
PKN2	78.2376	0.3949	0.209352	-1.8863	0.0592548	0.191024
SAP18	639.661	0.394177	0.15578	-2.53034	0.0113951	0.058188
WAC	142.745	0.391158	0.179629	-2.17758	0.029437	0.116029
MRPL33	136.704	0.389305	0.186108	-2.09182	0.0364545	0.134851
CSTB	453.088	0.388091	0.194994	-1.99027	0.046561	0.160626
GOLGA8A	217.211	0.38762	0.190245	-2.03748	0.0416024	0.147914
MYL12B	1322.24	0.387488	0.190175	-2.03754	0.0415963	0.147914
HBP1	115.454	0.387036	0.203951	-1.8977	0.0577361	0.187167
RBM17	204.336	0.385448	0.165156	-2.33384	0.0196041	0.0876221
HIKESHI	124.072	0.385065	0.197389	-1.95079	0.0510819	0.171236
CWF19L2	115.926	0.384378	0.195996	-1.96115	0.0498611	0.168801
TPM3	709.5	0.383527	0.146282	-2.62184	0.00874575	0.0478585
FUS	731.922	0.382994	0.204174	-1.87582	0.0606797	0.193788
ILF2	160.996	0.382512	0.191237	-2.0002	0.0454782	0.158442
ATP5MF	368.298	0.381416	0.181615	-2.10013	0.0357172	0.133274
SCP2	190.358	0.380158	0.179979	-2.11223	0.0346668	0.130698
ARPC4	153.54	0.379952	0.185798	-2.04498	0.0408572	0.146467
CDKN2D	169.585	0.378872	0.185765	-2.03952	0.0413977	0.147457
ELOB	753.532	0.374856	0.146102	-2.56573	0.010296	0.053952
GOLGA8B	218.119	0.37434	0.169008	-2.21493	0.026765	0.109005
FNBP1	287.222	0.372999	0.184875	-2.01757	0.0436356	0.153731
UBE2V1	194.869	0.371582	0.180559	-2.05795	0.039595	0.142877
XBP1	206.915	0.370184	0.185844	-1.99191	0.0463813	0.16031
RAB11A	122.009	0.369339	0.186188	-1.98369	0.047291	0.16231
YTHDC1	241.781	0.366642	0.168217	-2.17958	0.0292887	0.115838
SYNE2	367.209	0.366431	0.151655	-2.41621	0.015683	0.0739687
MRPS36	136.518	0.365197	0.19582	-1.86497	0.062186	0.196973
MRPL52	208.302	0.358739	0.178225	-2.01284	0.0441317	0.154915
ARID5B	461.717	0.358236	0.153465	-2.33431	0.0195794	0.0875793
FNBP4	243.415	0.357803	0.167547	-2.13554	0.0327172	0.125632
TLN1	249.454	0.357395	0.170334	-2.09821	0.035887	0.133821
LRRFIP1	270.28	0.355121	0.190823	-1.861	0.0627443	0.198417
SSR3	241.14	0.354173	0.184625	-1.91833	0.0550687	0.18074
PRPF38B	373.536	0.353263	0.169812	-2.08032	0.0374963	0.137874
UBL5	798.126	0.352061	0.137381	-2.56266	0.0103873	0.0542833
SERP1	1125.86	0.348205	0.137701	-2.5287	0.0114487	0.058308
NENF	146.927	0.344671	0.183648	-1.87681	0.0605448	0.19357
TMA7	2261.97	0.343005	0.123358	-2.78056	0.00542653	0.0332346
BRD7	222.978	0.341841	0.162482	-2.10386	0.0353905	0.132395
SRRM2	503.619	0.340039	0.144618	-2.35129	0.0187085	0.084596
MZT2A	467.248	0.339127	0.144106	-2.35332	0.0186067	0.084267
NDUFB2	513.573	0.338359	0.179274	-1.88738	0.0591088	0.190765
USF2	180.311	0.338236	0.173209	-1.95276	0.0508477	0.17084
GUK1	572.053	0.332775	0.149191	-2.23052	0.0257126	0.105878
SET	785.136	0.329455	0.133582	-2.4663	0.0136515	0.0667179
PSME1	794.698	0.328058	0.145803	-2.25001	0.024448	0.102362
SMAP2	721.233	0.326255	0.156937	-2.07889	0.0376274	0.138181
GABARAPL2	332.038	0.325199	0.152622	-2.13075	0.0331099	0.126471
CITED2	370.354	0.324443	0.16185	-2.0046	0.045006	0.157552
TAX1BP1	266.595	0.324379	0.158896	-2.04145	0.0412058	0.146864
HNRNPA3	655.671	0.322224	0.139065	-2.31708	0.0204995	0.0907917
SELENOW	408.963	0.318291	0.149156	-2.13395	0.0328465	0.125983
PTPRC	1403.81	0.317421	0.15677	-2.02475	0.042893	0.151575
SRRM1	632.96	0.317344	0.145687	-2.17826	0.0293866	0.115988
HLA-B	3863.91	0.309489	0.140292	-2.20603	0.0273817	0.110864
UBE2D3	596.293	0.303065	0.151565	-1.99958	0.0455459	0.158442
FXYD5	1225.86	0.299435	0.133902	-2.23622	0.0253372	0.104928
PSMD8	259.298	0.297588	0.157528	-1.88911	0.0588768	0.190248
COX6B1	871.926	0.291556	0.154564	-1.88631	0.059253	0.191024
OCIAD2	351.611	0.283259	0.151383	-1.87114	0.0613253	0.194992
SRSF11	381.674	0.280339	0.149772	-1.87178	0.0612377	0.19482
ATP5MC2	1422.28	0.262295	0.129357	-2.02769	0.0425922	0.150695
COX7C	2725.76	0.241624	0.124185	-1.94567	0.0516939	0.172889
EEF1D	4242.21	-0.228703	0.120869	1.89216	0.0584695	0.189228
CORO1A	1026.77	-0.246996	0.129572	1.90624	0.0566189	0.184576
AC004086.1	10005.2	-0.275604	0.14628	1.88409	0.059553	0.191666
UBXN1	752.914	-0.303566	0.159661	1.90132	0.0572606	0.186156
LDHB	841.506	-0.304941	0.157829	1.9321	0.0533476	0.177062
SP110	234.009	-0.316298	0.163541	1.93405	0.0531066	0.176596
EID1	481.186	-0.317248	0.142033	2.23362	0.0255082	0.10541
KRT10	422.091	-0.32553	0.157311	2.06933	0.0385148	0.14053
ISCU	374.873	-0.328297	0.159941	2.05262	0.0401096	0.144347
EIF3F	1110.08	-0.346103	0.143525	2.41144	0.0158895	0.074882
C12orf57	1099.33	-0.346415	0.184653	1.87603	0.0606517	0.193788
SUMF2	138.831	-0.350991	0.189097	1.85614	0.0634339	0.199983
SMC3	152.515	-0.358436	0.188815	1.89835	0.0576503	0.187098
CD48	1957.64	-0.360167	0.174066	2.06914	0.0385332	0.14053
AL121845.3	398.414	-0.362801	0.150041	2.41802	0.0156053	0.0736621
RPL15	6292.4	-0.363185	0.180216	2.01528	0.0438755	0.154218
APEX1	251.104	-0.369188	0.169749	2.17491	0.0296369	0.116501
RPL7L1	118.306	-0.37667	0.197999	1.90238	0.0571216	0.185901
PSMD7	133.32	-0.37807	0.19673	1.92177	0.0546342	0.179679
2006-09-01	287.167	-0.380897	0.192111	1.98269	0.0474023	0.162466
ITGB2	302.033	-0.385616	0.187042	2.06165	0.0392409	0.142129
PHIP	138.748	-0.386341	0.200395	1.9279	0.0538681	0.178108
COPS6	161.211	-0.387432	0.188558	2.05471	0.039907	0.143734
AIP	196.435	-0.387457	0.189477	2.04487	0.0408676	0.146467
SNRPC	138.045	-0.388815	0.200501	1.93922	0.0524749	0.174796
NDUFB7	258.667	-0.38907	0.169024	2.30185	0.0213434	0.0933832
RCSD1	292.252	-0.390388	0.159137	2.45316	0.0141606	0.0686372
MPHOSPH8	469.659	-0.395823	0.20482	1.93254	0.0532928	0.177012
MRPS33	145.086	-0.396107	0.19489	2.03246	0.0421071	0.149251
CCT3	286.91	-0.396359	0.16575	2.3913	0.0167887	0.0780359
LSM3	198.647	-0.39822	0.187784	2.12062	0.0339537	0.129184
SSU72	273.816	-0.400657	0.208653	1.92021	0.054832	0.180137
VSIR	244.932	-0.401596	0.182082	2.20557	0.0274138	0.110916
IGBP1	281.157	-0.402016	0.159564	2.51946	0.0117535	0.0592368
TSR2	114.39	-0.403679	0.21458	1.88126	0.059937	0.192156
LIMD2	238.982	-0.405362	0.185461	2.1857	0.0288379	0.114602
IMP3	179.248	-0.40691	0.199288	2.04182	0.0411698	0.146864
EBLN3P	148.73	-0.408932	0.217255	1.88227	0.0597996	0.191927
ZBTB7A	151.652	-0.41479	0.21546	1.92514	0.054212	0.178736
MRPS24	111.569	-0.415345	0.205301	2.0231	0.0430627	0.151989
KPNB1	104.951	-0.418694	0.209772	1.99595	0.0459399	0.159335
CCDC167	126.885	-0.419925	0.214554	1.9572	0.050324	0.169774
LSM4	197.592	-0.421859	0.17832	2.36574	0.0179939	0.0825872
EPB41	237.231	-0.424692	0.172355	2.46406	0.0137374	0.0670813
EIF3M	442.425	-0.426156	0.188269	2.26355	0.0236021	0.0997334
GON4L	89.6223	-0.427915	0.221497	1.93193	0.0533687	0.177062
TMEM208	92.9236	-0.428209	0.213897	2.00194	0.0452908	0.158123
STOML2	88.7715	-0.429759	0.222373	1.93261	0.0532847	0.177012
PFDN4	80.8591	-0.430821	0.232126	1.85598	0.0634563	0.199983
TSR3	103.523	-0.431665	0.225393	1.91517	0.055471	0.181754
TGOLN2	204.879	-0.431956	0.17754	2.433	0.0149742	0.0711456
SSBP1	355.958	-0.434368	0.159111	2.72996	0.00633414	0.0372604
TMPO	164.615	-0.43536	0.197168	2.20806	0.0272398	0.110598
EIF3G	814.538	-0.435867	0.160597	2.71404	0.00664672	0.0386607
GPATCH8	102.917	-0.437169	0.235585	1.85567	0.0635	0.199983
RBL2	173.672	-0.438025	0.197525	2.21757	0.0265844	0.108391
MARCH9	91.3214	-0.438348	0.223886	1.9579	0.0502412	0.169768
RSF1	168.626	-0.44782	0.189387	2.36458	0.0180506	0.0827166
SUN2	204.98	-0.448346	0.197451	2.27066	0.0231674	0.099123
TMEM123	496.187	-0.449046	0.194664	2.30677	0.0210677	0.0926659
MRPL40	98.058	-0.452131	0.213385	2.11885	0.0341034	0.129499
CTDSP1	98.2213	-0.453742	0.230258	1.97058	0.0487717	0.165984
POLR2B	89.4709	-0.454445	0.22839	1.98978	0.0466156	0.160719
SH3BP5	195.657	-0.455338	0.187764	2.42506	0.0153058	0.0723661
ZBTB38	143.804	-0.455443	0.205164	2.21989	0.026426	0.107897
TGS1	77.7188	-0.456365	0.24129	1.89135	0.0585771	0.18947
ZCRB1	104.532	-0.457158	0.208222	2.19553	0.0281256	0.112619
THRAP3	225.049	-0.458366	0.190326	2.40832	0.0160263	0.0754039
MLLT6	150.054	-0.460385	0.205089	2.2448	0.0247809	0.103212
TMC6	194.356	-0.460717	0.214442	2.14844	0.0316785	0.122605
EVL	638.146	-0.461334	0.160572	2.87307	0.00406503	0.0267284
RPS6KA1	59.9459	-0.46142	0.247163	1.86687	0.0619197	0.196451
NEMF	122.374	-0.464246	0.198746	2.33587	0.0194978	0.0873489
UBE2J2	76.9285	-0.466362	0.238218	1.95771	0.0502638	0.169768
INPP4B	172.202	-0.466541	0.191141	2.44082	0.0146538	0.0703138
CCS	73.9759	-0.470771	0.244058	1.92893	0.0537396	0.177886
ADH5	130.744	-0.470883	0.217877	2.16123	0.0306773	0.119539
LRP10	77.2834	-0.471995	0.241786	1.95212	0.0509239	0.17084
PNN	394.686	-0.473772	0.189548	2.49948	0.0124375	0.0618784
NIFK	143.865	-0.474063	0.210168	2.25564	0.0240932	0.101293
NAAA	64.0465	-0.475041	0.252299	1.88285	0.0597212	0.191927
URGCP-MRPS24	103.147	-0.47583	0.209069	2.27595	0.0228491	0.0981954
FBXO9	81.6891	-0.482208	0.225387	2.13946	0.0323982	0.124737
TRIP11	91.3179	-0.485051	0.224172	2.16374	0.0304841	0.119186
PTPN18	56.6008	-0.485554	0.258136	1.881	0.0599722	0.192162
PSMC1	102.259	-0.485865	0.213365	2.27716	0.0227769	0.0979927
ERAP2	115.074	-0.486458	0.221421	2.19698	0.028022	0.112515
LENG1	79.0106	-0.487362	0.244869	1.9903	0.0465581	0.160626
ATP5PB	218.166	-0.487552	0.169197	2.88157	0.00395698	0.02623
AP001931.1	93.6743	-0.487666	0.221606	2.2006	0.0277643	0.111904
ARL16	57.4465	-0.488328	0.261733	1.86575	0.0620766	0.196836
CYFIP2	117.353	-0.491817	0.215101	2.28644	0.0222283	0.0961495
CCDC130	62.5858	-0.492016	0.248319	1.98139	0.0475478	0.162773
ASNA1	53.2663	-0.493211	0.264974	1.86136	0.0626937	0.198365
UTP3	70.1273	-0.493855	0.237638	2.07818	0.037693	0.138335
SNX17	117.869	-0.494384	0.217562	2.27239	0.0230631	0.0988955
GRK6	170.517	-0.495009	0.196446	2.51983	0.0117413	0.0592368
M6PR	182.409	-0.495331	0.183781	2.69523	0.00703407	0.0404355
ZCCHC7	79.2064	-0.495804	0.236843	2.09339	0.0363144	0.134723
FBL	239.195	-0.496041	0.250147	1.983	0.0473679	0.162444
RETREG2	72.3011	-0.496189	0.253986	1.95361	0.0507476	0.170741
CCDC18-AS1	75.1751	-0.502296	0.244869	2.05129	0.0402389	0.144571
RPN2	151.677	-0.503638	0.240779	2.0917	0.0364651	0.134851
ZNF688	56.4087	-0.504894	0.254508	1.9838	0.047278	0.16231
THUMPD3-AS1	71.662	-0.506838	0.235935	2.14822	0.0316967	0.122605
CELF1	85.8281	-0.50828	0.241211	2.1072	0.0351002	0.131648
NDUFV3	64.799	-0.508381	0.248886	2.04263	0.0410893	0.146864
C1QBP	323.566	-0.509982	0.172091	2.96344	0.0030422	0.0210776
BLOC1S4	156.931	-0.511047	0.196225	2.60439	0.00920389	0.0498487
RPL17-C18orf32	4249.5	-0.511941	0.14965	3.42092	0.000624094	0.00574246
GRAMD1A	72.6923	-0.512471	0.249361	2.05514	0.0398657	0.143675
RPRD2	52.8886	-0.513295	0.263589	1.94733	0.0514953	0.172344
STK10	117.313	-0.513421	0.203913	2.51784	0.0118077	0.0594586
CCDC69	76.6405	-0.515455	0.265647	1.94038	0.0523338	0.174426
UQCRC2	137.345	-0.515475	0.211413	2.43824	0.0147589	0.0707016
FGD3	92.7579	-0.515761	0.215756	2.39048	0.0168262	0.0780359
GMCL1	72.5327	-0.517217	0.235738	2.19404	0.0282326	0.112737
SUPT20H	68.1311	-0.517665	0.242762	2.1324	0.0329739	0.126284
NUDT16L1	122.642	-0.517788	0.205498	2.51967	0.0117465	0.0592368
CFLAR	231.142	-0.517895	0.2289	2.26253	0.0236644	0.0999239
PEX16	85.1063	-0.51857	0.232967	2.22593	0.0260186	0.106533
MRPL44	54.1561	-0.519382	0.263748	1.96924	0.048926	0.166314
ORC4	46.6289	-0.521407	0.274238	1.90129	0.0572639	0.186156
CCNC	89.8917	-0.521794	0.239804	2.17592	0.0295614	0.116283
BTN3A2	174.627	-0.521925	0.191183	2.72998	0.00633374	0.0372604
BIN1	308.664	-0.524715	0.165206	3.17613	0.00149253	0.0118221
CWC15	144.18	-0.525623	0.187507	2.80322	0.00505956	0.0315191
APH1A	119.273	-0.526596	0.234665	2.24403	0.0248304	0.10327
WASF2	309.684	-0.526876	0.197035	2.67403	0.00749459	0.0423455
GSDMD	130.591	-0.529223	0.204939	2.58235	0.00981308	0.0520186
LYRM1	54.7656	-0.529805	0.257152	2.06028	0.0393721	0.142515
MAP4K2	57.1918	-0.529873	0.25361	2.08932	0.0366789	0.135469
RPS6KA5	75.2764	-0.530243	0.245337	2.16129	0.030673	0.119539
RBMX2	76.6638	-0.530576	0.230601	2.30084	0.0214008	0.0935642
SVIL	55.5702	-0.53112	0.262771	2.02123	0.0432561	0.152579
RASGRP2	236.586	-0.532107	0.181792	2.92701	0.00342238	0.0232674
DMAC1	101.703	-0.532903	0.218627	2.4375	0.0147894	0.0707309
2009-09-01	268.144	-0.53321	0.193799	2.75136	0.00593489	0.0356708
MAT2B	61.3633	-0.533846	0.260103	2.05244	0.0401268	0.144347
MRPS18B	86.4526	-0.535287	0.235082	2.27702	0.0227851	0.0979927
FSCN3	76.0808	-0.53545	0.267374	2.00262	0.0452179	0.157963
NCBP2	71.2845	-0.535923	0.244046	2.19599	0.0280927	0.112615
TMEM106B	94.6057	-0.536	0.243395	2.20218	0.0276525	0.111571
C6orf89	52.8436	-0.537098	0.281914	1.90519	0.0567558	0.184918
PRDX4	54.2649	-0.537394	0.275274	1.95222	0.0509126	0.17084
TMEM179B	67.8724	-0.538727	0.239805	2.24652	0.0246704	0.102826
PYROXD1	45.0346	-0.539188	0.28379	1.89995	0.0574391	0.186516
PLAC8	296.424	-0.541549	0.272883	1.98454	0.0471953	0.162236
RNF187	81.5038	-0.541565	0.240856	2.2485	0.0245441	0.102626
RPL9	5476.03	-0.542387	0.221763	2.4458	0.0144533	0.0698135
NCBP2AS2	175.212	-0.544384	0.203438	2.67592	0.00745253	0.042214
FAM102A	136.487	-0.54461	0.20931	2.60193	0.00927014	0.0500674
NCKAP1L	69.5062	-0.54491	0.236874	2.30042	0.0214243	0.0935963
GPATCH4	68.9082	-0.545866	0.261663	2.08615	0.0369654	0.136267
ATP5PO	548.217	-0.546058	0.168675	3.23734	0.00120651	0.00990803
THEM4	155.029	-0.546146	0.189336	2.88454	0.00391989	0.026127
IKZF3	158.034	-0.546249	0.203422	2.6853	0.00724641	0.0412882
MRPL34	183.892	-0.546443	0.189995	2.87609	0.00402638	0.0265047
C12orf10	101.696	-0.546542	0.220734	2.47602	0.0132857	0.0651493
GRAP2	70.7166	-0.547373	0.249051	2.19784	0.0279608	0.112346
JAK3	69.4478	-0.547927	0.244576	2.24031	0.0250706	0.10412
LZIC	59.6007	-0.548527	0.257279	2.13203	0.0330045	0.126318
CUTC	64.8739	-0.548815	0.241952	2.26828	0.0233121	0.0991295
PLA2G12A	44.758	-0.548862	0.293168	1.87217	0.0611825	0.19482
TIMM9	82.3064	-0.549568	0.224884	2.44378	0.0145341	0.0700872
LY9	54.3173	-0.550148	0.294491	1.86813	0.0617438	0.196108
COA5	66.6505	-0.552832	0.26199	2.11012	0.0348477	0.13121
CZIB	64.5356	-0.55329	0.257835	2.14591	0.0318806	0.123071
EPB41L4A-AS1	335.438	-0.554364	0.260099	2.13136	0.0330597	0.126362
GLG1	109.643	-0.556106	0.207554	2.67933	0.00737702	0.041868
ZNF32	88.2235	-0.556247	0.228774	2.43143	0.0150395	0.0712229
GPAA1	43.9191	-0.556792	0.288751	1.92828	0.0538204	0.178052
PIP4P1	48.1595	-0.556857	0.289034	1.92662	0.0540273	0.178229
FYB1	766.512	-0.558209	0.155449	3.59094	0.000329486	0.00339183
ATP8B2	69.571	-0.558255	0.270717	2.06213	0.0391952	0.142052
IRF9	76.4301	-0.559246	0.267856	2.08786	0.0368107	0.135825
MAML2	179.815	-0.559756	0.221317	2.52921	0.011432	0.0582742
NOL11	60.3815	-0.560086	0.255652	2.19082	0.0284651	0.113353
LRRC47	38.8779	-0.560242	0.298056	1.87965	0.0601552	0.192536
PLEKHJ1	74.0386	-0.560377	0.245509	2.28251	0.022459	0.0969494
DGKZ	161.363	-0.560642	0.225944	2.48133	0.0130892	0.064458
ERBIN	97.4464	-0.561312	0.298503	1.88042	0.0600505	0.192307
SH3YL1	122.872	-0.561695	0.211443	2.65649	0.00789589	0.0441565
AKTIP	47.1323	-0.56259	0.280666	2.00448	0.0450188	0.157552
ANKRD36BP1	104.81	-0.563835	0.209793	2.68757	0.00719731	0.0411295
MRPL38	44.818	-0.565507	0.284599	1.98703	0.0469187	0.161533
F8A1	70.7183	-0.566438	0.251192	2.255	0.0241332	0.101314
GLUD1	59.1628	-0.566546	0.255848	2.21438	0.0268024	0.10905
UBQLN2	73.1503	-0.569312	0.241481	2.35759	0.018394	0.0837613
NUP210	67.1073	-0.572779	0.2525	2.26844	0.0233027	0.0991295
PPCS	68.2072	-0.572809	0.257758	2.22227	0.0262648	0.107465
AIMP1	175.79	-0.5744	0.185528	3.09603	0.00196133	0.0148468
PEPD	65.9122	-0.574817	0.274249	2.09597	0.036085	0.134215
AC004156.1	144.462	-0.575806	0.261674	2.20047	0.0277736	0.111904
RNF214	46.1678	-0.575977	0.272455	2.11402	0.0345133	0.130409
DDX1	40.0624	-0.578729	0.306358	1.88906	0.0588833	0.190248
MKLN1	54.2913	-0.579772	0.28811	2.01233	0.0441849	0.155008
MRE11	38.0083	-0.582361	0.297519	1.95739	0.0503013	0.169774
LINC00909	38.7013	-0.582473	0.304276	1.91429	0.0555826	0.181976
AC040162.1	95.3203	-0.582938	0.262656	2.2194	0.0264599	0.107959
CAPN1	59.7712	-0.583059	0.288155	2.02342	0.0430298	0.151965
DGKA	116.333	-0.58306	0.233443	2.49766	0.0125017	0.0620915
NCK2	367.64	-0.584584	0.191058	3.05972	0.00221541	0.0162613
ATP5F1A	327.846	-0.584616	0.183207	3.19102	0.00141773	0.0112758
TRIM28	102.16	-0.585506	0.244935	2.39045	0.0168276	0.0780359
PMM2	48.1333	-0.586033	0.274909	2.13173	0.0330288	0.126328
CEBPZOS	60.7835	-0.586907	0.254191	2.30892	0.0209478	0.0922082
C5orf24	69.8334	-0.588515	0.237127	2.48185	0.0130702	0.0644189
TLE5	1214.93	-0.58868	0.169201	3.47918	0.000502959	0.00477154
ZMYND8	51.872	-0.588952	0.300241	1.9616	0.0498096	0.168725
RPL17	8169.93	-0.590626	0.208008	2.83944	0.00451932	0.0290257
TRAPPC2	69.5589	-0.591085	0.242036	2.44214	0.0146005	0.070246
TSC22D4	63.8223	-0.594431	0.244045	2.43574	0.0148613	0.0709011
SRSF1	64.3992	-0.59551	0.266265	2.23654	0.0253166	0.104928
BEX3	61.2437	-0.596949	0.298321	2.00103	0.0453895	0.158372
ICAM3	542.137	-0.597107	0.176821	3.37691	0.000733063	0.0065079
AL022238.4	42.1684	-0.598341	0.30378	1.96965	0.0488784	0.16625
CERS5	43.3404	-0.598453	0.292758	2.04419	0.0409346	0.146617
BIN2	258.175	-0.598994	0.190146	3.15019	0.00163166	0.012701
ZNF224	37.6687	-0.599365	0.299708	1.99983	0.045519	0.158442
DBNL	154.505	-0.599513	0.20773	2.88603	0.0039014	0.0260363
GBP1	73.0376	-0.600824	0.290431	2.06874	0.0385709	0.140579
CTDSP2	74.4109	-0.600948	0.241431	2.48911	0.0128064	0.0632799
NUBP2	91.7545	-0.605122	0.233143	2.5955	0.00944528	0.0507301
THAP1	39.1636	-0.605857	0.29412	2.0599	0.0394084	0.142558
TTC3	220.154	-0.606188	0.261359	2.31937	0.0203751	0.0904418
PPP1R35	101.942	-0.606437	0.255793	2.37082	0.0177489	0.0817857
TRNAU1AP	43.092	-0.606808	0.29426	2.06215	0.0391933	0.142052
SNHG14	36.4109	-0.607122	0.307521	1.97424	0.0483542	0.164853
ZNF207	123.93	-0.607986	0.207073	2.9361	0.00332372	0.0227565
RPL7	5359.86	-0.608116	0.2095	2.90271	0.00369951	0.0249415
GIMAP2	138.47	-0.610375	0.210114	2.90497	0.00367287	0.0247962
EIF2S3	461.239	-0.611896	0.207158	2.95376	0.00313925	0.0216724
FAM210B	34.888	-0.612733	0.320765	1.91023	0.0561041	0.183309
URM1	77.7521	-0.614344	0.244349	2.51421	0.0119299	0.0599181
PNKD	54.4523	-0.614528	0.271134	2.26651	0.0234202	0.0993987
AC245407.2	108.797	-0.616859	0.259439	2.37766	0.0174228	0.0804748
PITPNA-AS1	100.664	-0.61794	0.21942	2.81624	0.00485895	0.0306309
ACAP1	396.261	-0.618682	0.17967	3.44343	0.000574384	0.00535293
AC022706.1	37.6182	-0.619193	0.30064	2.05958	0.0394385	0.142578
AL662844.4	93.1825	-0.619705	0.239981	2.58231	0.00981422	0.0520186
TBC1D10C	258.417	-0.621339	0.172317	3.60578	0.000311211	0.00322084
AC245033.1	438.969	-0.621382	0.188727	3.29249	0.00099306	0.00841709
STRN	41.0999	-0.621442	0.291769	2.12991	0.033179	0.126569
EXOSC5	31.4557	-0.621803	0.334842	1.857	0.0633108	0.199983
GPALPP1	33.9975	-0.623575	0.315335	1.9775	0.047985	0.163873
GABPB1-IT1	99.456	-0.625417	0.227394	2.75037	0.00595288	0.0356936
ZNF770	46.2053	-0.625994	0.287064	2.18068	0.0292071	0.115594
TRAK2	39.6513	-0.626886	0.296323	2.11554	0.0343835	0.130269
FEM1B	32.7162	-0.626944	0.329259	1.90411	0.0568963	0.185272
CRBN	131.738	-0.628018	0.202422	3.10252	0.00191881	0.0145629
ATP6V1G2-DDX39B	42.5207	-0.628459	0.285129	2.20412	0.0275158	0.111192
NUMA1	68.0919	-0.628592	0.258145	2.43503	0.0148905	0.0709088
POLK	44.6792	-0.629061	0.279833	2.24798	0.0245772	0.102626
CINP	32.9891	-0.630392	0.320237	1.96852	0.0490085	0.166497
MRPL27	33.3003	-0.630569	0.315814	1.99665	0.0458636	0.159261
TASOR	73.2232	-0.630886	0.238485	2.64539	0.00815972	0.0452919
CDKN2AIPNL	51.0197	-0.631139	0.292659	2.15657	0.0310392	0.120706
PPP1CA	151.347	-0.633643	0.191887	3.30216	0.000959431	0.00814394
LRCH3	33.599	-0.635724	0.333101	1.9085	0.0563263	0.183828
NDUFC1	190.104	-0.636342	0.199136	3.19551	0.00139582	0.0111321
EIF3B	97.1722	-0.636618	0.222627	2.85958	0.00424205	0.0275805
CALCOCO1	40.7772	-0.639216	0.313775	2.03718	0.0416321	0.147929
ZNF12	32.5475	-0.639349	0.314369	2.03375	0.0419764	0.148879
WBP4	42.8685	-0.639655	0.297575	2.14956	0.0315899	0.122355
GGNBP2	268.997	-0.639999	0.172585	3.70831	0.000208645	0.00228565
FNTA	95.9844	-0.640533	0.218561	2.93069	0.00338214	0.0230749
KIN	69.0599	-0.640843	0.25742	2.48948	0.012793	0.0632675
GMPR2	66.8245	-0.64139	0.245271	2.61503	0.00892193	0.0486392
GAS5	2048.29	-0.641561	0.228853	2.80338	0.00505707	0.0315191
UQCC3	59.8599	-0.641772	0.250503	2.56193	0.0104093	0.054349
GPANK1	51.7538	-0.642087	0.262653	2.44462	0.0145006	0.0699836
DCAF10	30.0448	-0.642488	0.335474	1.91516	0.0554717	0.181754
HDAC7	44.8292	-0.642869	0.292673	2.19654	0.028053	0.112561
MRPL24	39.4359	-0.643369	0.298949	2.1521	0.0313893	0.121822
LINC00667	49.6734	-0.643701	0.277362	2.32079	0.0202981	0.0901687
NOL12	33.2165	-0.643777	0.323297	1.99129	0.0464494	0.160431
PIK3IP1	1045.37	-0.645279	0.183593	3.51472	0.00044021	0.00430285
AC087289.4	41.4092	-0.647262	0.294771	2.19581	0.0281052	0.112615
SMPD1	31.1383	-0.64737	0.33335	1.94202	0.0521352	0.173864
TAF9	50.6053	-0.6476	0.273122	2.3711	0.0177351	0.0817857
DDX17	511.754	-0.650077	0.161436	4.02685	5.65296e-05	0.000759747
SLC39A7	29.1558	-0.650373	0.344462	1.88808	0.0590146	0.190566
WDR46	59.6527	-0.652202	0.280301	2.32679	0.0199763	0.0889437
ZBTB37	32.2869	-0.653567	0.327157	1.99771	0.0457478	0.158954
MVP	66.0784	-0.654088	0.30057	2.17616	0.0295432	0.116283
L3MBTL2	29.8721	-0.654276	0.332809	1.96592	0.0493078	0.167416
ADAR	115.402	-0.654396	0.20594	3.17761	0.00148494	0.0117781
C6orf226	71.1032	-0.656878	0.286288	2.29446	0.0217638	0.0945814
KLHL36	71.9674	-0.657208	0.256998	2.55725	0.0105503	0.0548881
CNOT7	126.208	-0.657325	0.20773	3.16432	0.00155444	0.0121961
SCML4	149.02	-0.658954	0.19194	3.43313	0.000596647	0.00554261
GLI4	35.3803	-0.660359	0.347942	1.8979	0.0577094	0.187167
TBRG4	41.1621	-0.661966	0.307449	2.15309	0.0313114	0.121601
PHB2	276.272	-0.662111	0.190191	3.48129	0.000499002	0.00474758
PTCD3	55.71	-0.662983	0.261487	2.53543	0.0112308	0.0575008
THAP7	70.3497	-0.664937	0.268306	2.47828	0.0132019	0.064848
CELF2	562.06	-0.666658	0.265374	2.51215	0.012	0.0602176
POU2F2	66.9812	-0.667386	0.265384	2.51479	0.0119104	0.0598715
FBH1	38.5872	-0.667949	0.342035	1.95287	0.0508354	0.17084
ABHD14B	55.4256	-0.669849	0.259418	2.58212	0.00981956	0.0520186
MTX3	28.9822	-0.67005	0.356162	1.88131	0.05993	0.192156
IPO9	40.0231	-0.670309	0.305594	2.19346	0.0282741	0.112825
CPSF7	34.0584	-0.67343	0.319803	2.10577	0.0352246	0.131921
KRI1	26.7334	-0.6737	0.349583	1.92715	0.0539606	0.17811
FBXO22	46.3805	-0.674352	0.292936	2.30205	0.0213325	0.0933832
GLT8D1	41.949	-0.675194	0.296952	2.27375	0.022981	0.0986893
GIGYF1	51.8959	-0.675959	0.276798	2.44207	0.0146033	0.070246
LYRM7	43.4055	-0.677452	0.288416	2.34887	0.0188303	0.0848489
NSFL1C	59.2777	-0.679134	0.313375	2.16716	0.0302226	0.118402
HDDC3	63.8963	-0.680582	0.248159	2.74253	0.00609687	0.0362689
MAL	332.13	-0.681461	0.179167	3.80349	0.00014267	0.00165338
TMEM245	40.9242	-0.682539	0.327973	2.08108	0.0374266	0.137705
SNHG30	59.1624	-0.682695	0.267692	2.5503	0.0107631	0.0556458
PIGC	32.6557	-0.6827	0.333754	2.04552	0.0408038	0.14642
AC069281.2	66.9862	-0.683139	0.278304	2.45465	0.0141021	0.0684586
MIF4GD	42.0758	-0.683535	0.305665	2.23622	0.0253374	0.104928
ANKRD26	44.4752	-0.683925	0.288775	2.36837	0.0178667	0.0822631
IL17RA	43.0968	-0.686508	0.285768	2.40232	0.0162914	0.0762806
MAPK3	37.0509	-0.686808	0.304999	2.25183	0.0243327	0.102078
CSGALNACT1	58.7961	-0.686884	0.261593	2.62578	0.00864517	0.0475126
ABT1	73.4411	-0.687584	0.240443	2.85965	0.00424106	0.0275805
EEF2	1606.94	-0.687998	0.180463	3.8124	0.000137622	0.00160127
DICER1	53.3613	-0.688384	0.269914	2.55038	0.0107604	0.0556458
ZNF26	40.5613	-0.690455	0.332933	2.07386	0.0380924	0.139448
PRKY	62.4412	-0.69092	0.367626	1.87941	0.0601882	0.192536
DEXI	42.0751	-0.691508	0.292846	2.36134	0.0182093	0.0832465
AC022137.4	30.0615	-0.694081	0.341704	2.03124	0.0422311	0.1496
ABTB1	76.6174	-0.695837	0.251362	2.76827	0.00563547	0.0342972
STAT6	36.3939	-0.695901	0.305357	2.27897	0.0226686	0.0977088
MRPS10	55.8916	-0.695986	0.265102	2.62535	0.00865608	0.0475126
ASB8	64.4502	-0.696089	0.247833	2.8087	0.00497422	0.0311882
NOL9	44.8417	-0.696948	0.295451	2.35893	0.0183277	0.0835248
TMEM168	28.6184	-0.697674	0.337844	2.06508	0.0389156	0.141569
FCMR	197.987	-0.697814	0.181451	3.84575	0.000120182	0.00142403
GARS-DT	25.4912	-0.698069	0.348397	2.00366	0.0451066	0.157764
MLH3	39.5093	-0.699378	0.320959	2.17903	0.0293297	0.115842
EIF3J-DT	32.4686	-0.69952	0.330728	2.11509	0.0344224	0.130284
CTU1	33.8073	-0.700482	0.331509	2.11301	0.0345997	0.130615
ERCC6L2	35.0228	-0.700685	0.346778	2.02056	0.0433258	0.152732
SESN1	103.311	-0.701614	0.214502	3.2709	0.00107206	0.00899759
CWC27	58.7835	-0.70205	0.26451	2.65415	0.00795073	0.0443865
MFSD14C	59.8453	-0.702323	0.270315	2.59817	0.00937225	0.0504312
ECSIT	37.337	-0.70242	0.322319	2.17927	0.0293115	0.115842
TAF3	80.0752	-0.702577	0.364035	1.92997	0.0536104	0.177559
PIAS1	76.2501	-0.702579	0.277182	2.53472	0.0112538	0.057568
PLEKHA1	102.432	-0.703057	0.244841	2.87148	0.00408555	0.0268031
TDP2	35.1435	-0.705016	0.320579	2.19919	0.0278643	0.112114
AKT2	52.0383	-0.705553	0.306306	2.30343	0.0212548	0.093277
ATM	252.019	-0.70716	0.219114	3.22736	0.0012494	0.0102026
TUG1	66.1984	-0.70805	0.325723	2.17378	0.0297217	0.116755
LINC01550	54.3773	-0.708558	0.310105	2.2849	0.0223187	0.0964153
DTWD1	34.9357	-0.708743	0.364759	1.94304	0.0520107	0.173748
IL6ST	266.438	-0.709378	0.234693	3.02258	0.00250632	0.0179072
RNF216	81.3899	-0.710492	0.261566	2.7163	0.00660157	0.0385214
UCP2	315.186	-0.711365	0.172194	4.13118	3.60912e-05	0.000517397
LINC00649	29.8792	-0.711504	0.33343	2.13389	0.0328518	0.125983
NUP107	30.9368	-0.712173	0.339766	2.09607	0.0360761	0.134215
RPL21	16334.7	-0.712365	0.23211	3.06909	0.00214715	0.0159621
AP000892.3	27.7016	-0.712493	0.357374	1.99369	0.0461861	0.159903
RNF216P1	41.6129	-0.712553	0.303202	2.3501	0.0187686	0.0847361
ESYT1	60.4148	-0.712657	0.272168	2.61844	0.0088332	0.0482007
FAM217B	49.2271	-0.714108	0.287848	2.48086	0.0131067	0.0644896
DDX39B	160.522	-0.71412	0.192932	3.70141	0.000214401	0.00234428
COPS7B	31.0107	-0.714638	0.338004	2.11429	0.0344908	0.130409
C2orf74	24.9979	-0.715629	0.357753	2.00034	0.0454631	0.158442
PSMB8-AS1	61.5622	-0.715709	0.256923	2.7857	0.00534128	0.0329909
DIDO1	48.4954	-0.716518	0.277598	2.58113	0.00984765	0.0520724
PARP10	43.5194	-0.716957	0.294101	2.43779	0.0147772	0.0707308
CSTF2T	27.4662	-0.717029	0.342679	2.09242	0.0364008	0.134785
C1orf131	78.1351	-0.717226	0.247414	2.89889	0.00374485	0.025165
MRTO4	60.0839	-0.717936	0.29827	2.407	0.0160841	0.0754317
TRPV2	39.7143	-0.719156	0.317243	2.26689	0.0233968	0.0993724
JAGN1	87.2294	-0.722508	0.23795	3.03639	0.00239427	0.0172257
GABPB1-AS1	215.625	-0.72331	0.214036	3.37938	0.000726498	0.0064893
SSRP1	49.2496	-0.72347	0.286011	2.52951	0.0114221	0.0582742
NAE1	90.9626	-0.724669	0.239343	3.02775	0.00246384	0.0176388
POLL	25.9606	-0.72582	0.349981	2.07388	0.0380901	0.139448
PCED1B	53.2923	-0.728502	0.32106	2.26906	0.0232649	0.0991295
MED23	25.2503	-0.729265	0.353197	2.06475	0.0389465	0.141593
TTC14	174.528	-0.729794	0.228189	3.1982	0.0013829	0.0110742
FANCF	29.1539	-0.729883	0.366433	1.99186	0.0463867	0.16031
EAPP	158.324	-0.730539	0.191546	3.81391	0.000136787	0.00159475
ABLIM1	85.7656	-0.731114	0.278324	2.62685	0.00861799	0.0474725
MORC2	51.8975	-0.731153	0.292731	2.49769	0.0125005	0.0620915
ZNF274	35.1376	-0.733766	0.379134	1.93537	0.0529445	0.176158
ZNF292	158.607	-0.734168	0.229823	3.19449	0.00140077	0.0111562
PLSCR3	51.8252	-0.736823	0.268497	2.74426	0.00606481	0.0361152
ZDHHC12	58.2409	-0.737715	0.268591	2.74661	0.00602147	0.0359308
KAT8	53.6466	-0.73865	0.279883	2.63914	0.00831164	0.0460911
PPM1M	31.0315	-0.739645	0.327977	2.25517	0.0241227	0.101314
XPA	127.353	-0.739711	0.26177	2.8258	0.00471623	0.0299589
MFNG	146.115	-0.740791	0.217842	3.40059	0.00067241	0.00609051
ADD3	285.81	-0.741457	0.217818	3.40403	0.000664006	0.00602378
TMEM256-PLSCR3	51.2514	-0.74273	0.27138	2.73686	0.00620286	0.0367113
FAM98B	24.5082	-0.743358	0.372672	1.99467	0.0460786	0.159625
SNAPC5	31.2557	-0.743524	0.324333	2.29247	0.0218787	0.0949385
CHMP3	131.916	-0.743769	0.220163	3.37826	0.000729457	0.00650573
NDUFS2	117.137	-0.744448	0.207536	3.58708	0.000334397	0.00342799
AC073111.4	44.3879	-0.744656	0.324272	2.29639	0.0216534	0.0943132
DPH5	83.2516	-0.74499	0.261575	2.84809	0.00439822	0.0285001
PARP11	21.296	-0.746395	0.386538	1.93097	0.0534864	0.17725
CCDC115	76.4625	-0.747248	0.257181	2.90554	0.00366623	0.0247801
DNAJA3	33.2613	-0.748667	0.321167	2.33108	0.019749	0.088202
SORL1	140.803	-0.749932	0.2214	3.38723	0.000706017	0.0063356
ZNF880	29.6607	-0.751495	0.332552	2.25978	0.0238346	0.100497
S1PR4	213.088	-0.752611	0.213102	3.5317	0.000412903	0.00407015
MRPL28	31.0595	-0.752632	0.324911	2.31642	0.0205352	0.0908744
XPO6	54.3483	-0.753184	0.307592	2.44865	0.0143392	0.0693779
TSGA10	25.8343	-0.753239	0.385434	1.95426	0.0506702	0.170741
INO80E	39.5505	-0.75339	0.306789	2.45573	0.0140599	0.0683112
METTL14	26.2829	-0.75361	0.351094	2.14647	0.0318359	0.12298
TXK	137.995	-0.754359	0.336132	2.24424	0.0248172	0.10327
TSHZ2	178.126	-0.754403	0.329976	2.28623	0.0222406	0.0961495
AP5M1	23.9627	-0.756243	0.367965	2.0552	0.0398592	0.143675
TMIGD2	53.2093	-0.756741	0.342165	2.21163	0.0269924	0.10967
WAC-AS1	67.4126	-0.756908	0.289028	2.61881	0.00882383	0.0481949
EEF1G	2487.98	-0.757674	0.216399	3.50128	0.000463023	0.00447306
AC012146.1	25.2022	-0.760193	0.365664	2.07894	0.0376231	0.138181
VPS25	33.4358	-0.760554	0.370622	2.0521	0.0401597	0.144376
CASP8AP2	43.9765	-0.761462	0.317803	2.39602	0.0165743	0.0772933
DPF2	42.6454	-0.764221	0.290298	2.63254	0.00847486	0.0468619
TNRC6C	97.3733	-0.768351	0.292121	2.63025	0.00853209	0.0471335
TRABD2A	154.577	-0.772944	0.322414	2.39737	0.0165133	0.0771331
EIF3E	1363.69	-0.773291	0.236486	3.26992	0.00107578	0.00899993
SLC25A1	34.1377	-0.775387	0.319888	2.42394	0.0153533	0.0725315
GIMAP1-GIMAP5	48.7287	-0.775612	0.3175	2.44288	0.0145708	0.0702058
AL022311.1	44.1844	-0.776329	0.290928	2.66845	0.0076201	0.0429537
ITGB7	80.8952	-0.776888	0.238053	3.26351	0.00110042	0.00917964
RAB37	28.5393	-0.777221	0.35575	2.18474	0.0289079	0.114746
GRAP	35.4498	-0.778886	0.333637	2.33453	0.019568	0.0875793
STAG3L3	20.8755	-0.780817	0.403086	1.9371	0.0527332	0.175556
UBL4A	40.3145	-0.781068	0.294467	2.65248	0.00799018	0.0445211
BCAS4	55.0773	-0.782471	0.306283	2.55473	0.010627	0.0552376
RPL32P3	48.5464	-0.783221	0.275159	2.84643	0.00442129	0.0286176
MAPKAPK5-AS1	136.673	-0.783367	0.200387	3.90927	9.25745e-05	0.00113847
NOP53	2152.89	-0.783606	0.22156	3.53676	0.000405065	0.00399967
SLC8B1	28.1631	-0.783848	0.348713	2.24783	0.0245871	0.102626
TCF7	183.553	-0.784387	0.268062	2.92613	0.00343202	0.0233056
ZMAT1	33.6969	-0.784528	0.334477	2.34554	0.0189997	0.085315
ZNF507	23.6169	-0.787527	0.364437	2.16094	0.0306999	0.119547
RBM12B	17.0596	-0.788606	0.418937	1.8824	0.059782	0.191927
ST6GAL1	48.7719	-0.79009	0.300568	2.62866	0.00857225	0.0473103
SELPLG	117.713	-0.792383	0.218636	3.62421	0.000289845	0.00304863
ZNF414	24.4663	-0.792439	0.400824	1.97703	0.0480387	0.163873
ANAPC13	45.8138	-0.792534	0.28134	2.817	0.00484747	0.0305917
EI24	45.2432	-0.793047	0.280901	2.82323	0.00475421	0.0301672
DYRK2	97.0347	-0.793382	0.237924	3.33461	0.0008542	0.00735829
SRSF5	1122.06	-0.793964	0.202725	3.91646	8.986e-05	0.0011148
SDAD1	78.6149	-0.794157	0.237767	3.34006	0.000837617	0.00724769
NOL8	42.8159	-0.794576	0.295315	2.69061	0.0071322	0.0408781
SAP30L	31.8285	-0.795972	0.380365	2.09265	0.0363803	0.134785
PSMG4	78.8259	-0.796267	0.293017	2.71748	0.00657812	0.0384231
AP1M1	38.5128	-0.796654	0.308585	2.58163	0.00983341	0.0520445
CLUHP3	23.3212	-0.796748	0.378889	2.10285	0.0354785	0.132468
NECAP2	170.309	-0.797052	0.218306	3.65107	0.000261149	0.00280783
FUBP3	33.3841	-0.797101	0.350949	2.27127	0.0231303	0.0990375
TMEM251	18.4397	-0.797542	0.415034	1.92163	0.0546526	0.179679
RIC3	59.7022	-0.798554	0.29652	2.69309	0.00707942	0.0406559
BET1	19.3602	-0.801174	0.428278	1.87069	0.0613887	0.195086
TMEM101	43.1835	-0.803625	0.321277	2.50135	0.0123722	0.0616594
EIF2D	60.2688	-0.803664	0.291976	2.7525	0.0059142	0.0355918
TMC8	133.822	-0.805332	0.248525	3.24044	0.00119345	0.00981627
ZKSCAN1	61.5111	-0.807875	0.254618	3.17289	0.00150932	0.0119166
NPRL3	21.6885	-0.809767	0.395287	2.04856	0.0405055	0.145439
AC073508.2	28.3523	-0.812351	0.345176	2.35344	0.0186006	0.084267
DDX19A	21.3369	-0.816751	0.395742	2.06385	0.0390321	0.141726
AP002990.1	2366.19	-0.817142	0.208332	3.9223	8.77088e-05	0.00109749
PTPN6	80.0001	-0.820953	0.251025	3.2704	0.00107395	0.00899759
RBM15B	41.5366	-0.822136	0.347802	2.36381	0.0180882	0.0828234
SAMHD1	300.556	-0.822389	0.209087	3.93323	8.38123e-05	0.001051
ARL2	37.5771	-0.82242	0.307574	2.67389	0.00749762	0.0423455
SNRNP48	41.2114	-0.82276	0.297117	2.76915	0.00562033	0.0342769
ANKRD49	101.965	-0.822841	0.245315	3.35423	0.000795866	0.00699061
RSAD1	37.1352	-0.823211	0.368691	2.23279	0.0255627	0.10541
MLXIP	71.2855	-0.82357	0.276607	2.9774	0.00290705	0.0202378
SYTL1	163.605	-0.824087	0.207057	3.98001	6.89138e-05	0.000885206
SLC7A6OS	26.0259	-0.824112	0.356577	2.31117	0.0208232	0.0919388
RFFL	30.2222	-0.825668	0.335134	2.4637	0.0137513	0.0670923
MZF1	27.618	-0.826715	0.352097	2.34797	0.0188759	0.0849255
LYRM2	52.7199	-0.826929	0.281379	2.93884	0.00329441	0.0225825
GPR82	38.6277	-0.828038	0.382286	2.16602	0.0303098	0.118664
PCMTD2	31.7809	-0.828585	0.331965	2.496	0.0125601	0.0623283
SGSM3	27.2542	-0.83043	0.396508	2.09436	0.0362283	0.134575
C1orf50	17.8287	-0.830487	0.431659	1.92394	0.0543617	0.179128
TRAPPC12	18.5956	-0.831133	0.41243	2.01521	0.0438825	0.154218
GTF2H2	37.879	-0.831319	0.310043	2.6813	0.00733358	0.041703
CDC25B	83.6126	-0.831535	0.266546	3.11967	0.00181056	0.0138682
ATR	31.5494	-0.831578	0.341866	2.43247	0.0149963	0.0711924
PRKCQ-AS1	575.486	-0.832099	0.229532	3.6252	0.000288743	0.00304863
DAXX	36.9771	-0.832591	0.312473	2.66452	0.00770976	0.0433749
NLRC5	47.4893	-0.833873	0.354022	2.35542	0.0185016	0.0840848
PLPBP	52.5776	-0.834487	0.272249	3.06516	0.00217553	0.0160702
STRADB	27.388	-0.8378	0.394913	2.12148	0.0338816	0.129079
HELQ	38.2058	-0.838012	0.317891	2.63616	0.00838495	0.0464533
AC004151.1	247.971	-0.838161	0.200453	4.18134	2.89797e-05	0.000431426
CCDC66	154.482	-0.839702	0.210754	3.98427	6.76874e-05	0.000873318
AMDHD2	21.5061	-0.840486	0.383316	2.19267	0.0283309	0.112973
AC026362.1	151.774	-0.840998	0.230419	3.64987	0.000262378	0.00281064
SFI1	51.8267	-0.843663	0.292551	2.88382	0.00392887	0.0261295
VPS51	200.397	-0.844588	0.256902	3.28759	0.0010105	0.00852752
ANKZF1	62.3798	-0.846224	0.314266	2.6927	0.00708759	0.0406626
TYW5	27.4123	-0.847406	0.359754	2.35551	0.0184971	0.0840848
ADTRP	59.1947	-0.848657	0.326604	2.59843	0.00936514	0.0504312
PCSK7	177.382	-0.848657	0.212583	3.99212	6.54846e-05	0.000848669
SYNE3	23.7665	-0.849504	0.411296	2.06543	0.038882	0.141569
SDR39U1	35.2915	-0.85016	0.387404	2.1945	0.0281993	0.112737
RCBTB2	54.4227	-0.851156	0.279825	3.04174	0.00235215	0.0170069
MRPS18A	30.912	-0.85723	0.392419	2.18448	0.0289272	0.114746
KNOP1	46.2527	-0.857251	0.301671	2.84168	0.00448766	0.0289668
ZSCAN18	27.498	-0.858237	0.362884	2.36505	0.0180278	0.0826773
PYM1	47.318	-0.861248	0.308751	2.78946	0.0052796	0.0327493
PAXIP1-AS2	31.1067	-0.863126	0.338882	2.54698	0.010866	0.0559846
TSPAN14	164.445	-0.863181	0.190161	4.5392	5.64668e-06	0.000104743
LEF1	281.018	-0.86329	0.293628	2.94008	0.00328127	0.022519
RPL7P9	47.8738	-0.864549	0.42348	2.04154	0.0411975	0.146864
THAP11	95.1415	-0.865746	0.260951	3.31766	0.000907733	0.00772771
AC018521.5	21.6246	-0.86681	0.467125	1.85563	0.0635064	0.199983
NNT-AS1	29.0559	-0.867052	0.346692	2.50093	0.0123868	0.0616791
MRNIP	22.7635	-0.870481	0.378879	2.29752	0.0215892	0.0941041
LINC00476	49.3196	-0.870489	0.288488	3.01742	0.00254939	0.0181617
C1orf162	225.563	-0.871036	0.248207	3.50932	0.000449259	0.00438386
FBLN5	66.6514	-0.871384	0.285321	3.05404	0.0022578	0.016489
ITGB2-AS1	55.1946	-0.872417	0.356141	2.44964	0.0143	0.0692457
AL136295.5	14.4164	-0.872656	0.466062	1.8724	0.0611507	0.19482
C19orf25	44.8576	-0.873548	0.296267	2.94851	0.00319305	0.0219655
AL049840.1	30.9683	-0.874259	0.335826	2.60331	0.00923295	0.0499595
ZNF24	116.41	-0.874466	0.216452	4.03999	5.34525e-05	0.000726803
ZRANB2	338.57	-0.876187	0.182799	4.79317	1.64163e-06	3.40403e-05
IFRD2	49.3854	-0.87631	0.285706	3.06717	0.00216096	0.0160237
EIF3L	497.956	-0.879504	0.224787	3.91261	9.13027e-05	0.00112788
HDHD2	25.9113	-0.879602	0.388178	2.26597	0.0234529	0.099465
NUDT3	46.0416	-0.879624	0.296454	2.96716	0.00300569	0.0208495
ZFHX2-AS1	27.1191	-0.880296	0.355003	2.47968	0.0131499	0.0646473
SRFBP1	49.9424	-0.881501	0.285307	3.08966	0.00200385	0.01509
F8A3	31.7716	-0.881582	0.352297	2.50238	0.012336	0.0615318
C8orf76	24.1791	-0.88185	0.3746	2.35411	0.0185672	0.0842406
ZNF430	107.919	-0.882693	0.231074	3.81996	0.000133473	0.00155925
AC069503.2	29.4974	-0.88281	0.349476	2.5261	0.0115337	0.0586018
MUC20-OT1	36.799	-0.883512	0.322306	2.74122	0.00612111	0.0363386
GGA1	52.926	-0.884687	0.295086	2.99806	0.002717	0.0191676
TTC32	48.5743	-0.886095	0.327707	2.70392	0.00685259	0.0396277
RWDD3	43.4823	-0.888423	0.308139	2.88319	0.00393667	0.0261514
AC016747.4	22.4612	-0.888508	0.385531	2.30464	0.0211869	0.0930494
FP671120.4	772.871	-0.889103	0.247882	3.58679	0.000334769	0.00342799
SNHG32	261.289	-0.889691	0.271747	3.27397	0.00106046	0.0089362
CCL28	26.5736	-0.890099	0.390898	2.27707	0.0227823	0.0979927
MRPL46	19.6243	-0.892281	0.420825	2.12031	0.0339796	0.129198
FBXL15	89.2339	-0.892741	0.232525	3.83933	0.000123369	0.0014529
MALSU1	52.4184	-0.893995	0.289068	3.09268	0.00198358	0.0149957
LINS1	64.2947	-0.895286	0.327609	2.73279	0.00628012	0.0370553
ECE1	22.6563	-0.895439	0.379548	2.35922	0.0183133	0.0835246
ZNF136	29.9461	-0.898167	0.405684	2.21396	0.0268318	0.109093
SLAMF6	40.9309	-0.900658	0.339835	2.65028	0.00804253	0.0447269
PCSK1N	39.8697	-0.904137	0.394212	2.29353	0.0218176	0.0947443
GMEB1	32.0753	-0.908369	0.335332	2.70887	0.00675131	0.0391589
KBTBD4	24.097	-0.910271	0.365917	2.48764	0.0128593	0.0634873
CD27	354.212	-0.911263	0.165709	5.49918	3.81565e-08	1.08596e-06
MRPL15	30.8589	-0.912858	0.349809	2.60959	0.00906506	0.0491426
CCNT2	28.6948	-0.91372	0.420456	2.17316	0.0297679	0.116858
BCR	24.9513	-0.91594	0.448232	2.04345	0.0410078	0.146789
ZADH2	44.4793	-0.917638	0.316203	2.90205	0.00370729	0.0249415
PLEKHB1	36.9656	-0.9184	0.360382	2.54841	0.0108216	0.0558986
CCR7	275.981	-0.919326	0.180923	5.08131	3.74847e-07	9.14437e-06
YLPM1	26.1798	-0.920901	0.364899	2.52371	0.0116122	0.0587288
NAPRT	39.1799	-0.921577	0.324728	2.83799	0.00453981	0.0290776
TMEM63A	53.3245	-0.924273	0.300856	3.07214	0.0021253	0.0158401
KIAA2013	28.042	-0.926094	0.366841	2.52451	0.011586	0.0586984
ZNF264	44.8018	-0.926641	0.326351	2.8394	0.00451983	0.0290257
MKKS	46.2223	-0.926728	0.283232	3.27197	0.00106801	0.00898675
AC079594.2	16.8775	-0.928747	0.444463	2.08959	0.0366543	0.135465
FP671120.5	559.532	-0.931242	0.275714	3.37757	0.000731291	0.0065079
ARHGAP1	25.5714	-0.932855	0.392549	2.37641	0.0174822	0.0806851
SLC25A42	19.5738	-0.932917	0.411975	2.2645	0.0235436	0.0996197
TNRC6C-AS1	14.247	-0.936958	0.472781	1.9818	0.0475016	0.16271
YDJC	76.9256	-0.937488	0.264576	3.54335	0.000395073	0.00392773
CRIP2	64.3255	-0.93818	0.340114	2.75843	0.00580803	0.0350899
MMAB	25.6286	-0.943852	0.368193	2.56347	0.0103631	0.0542055
NFATC3	58.1638	-0.945477	0.306011	3.08969	0.00200368	0.01509
ADA2	25.1204	-0.946464	0.416883	2.27033	0.0231873	0.0991295
EIF3D	435.95	-0.946507	0.229109	4.13125	3.60794e-05	0.000517397
AMMECR1	41.4404	-0.948569	0.326852	2.90214	0.00370623	0.0249415
NAT9	26.8296	-0.950499	0.435448	2.18281	0.0290501	0.115051
GIMAP5	56.7872	-0.952615	0.298755	3.18862	0.00142956	0.0113543
FAM219B	25.8899	-0.952762	0.371496	2.56466	0.0103276	0.0540683
RAD51-AS1	31.7452	-0.954082	0.335767	2.8415	0.0044902	0.0289668
TMEM56-RWDD3	41.1117	-0.955208	0.307937	3.10196	0.00192244	0.0145714
APEH	33.9534	-0.958123	0.348102	2.75242	0.00591562	0.0355918
ARHGEF18	43.0923	-0.958621	0.381808	2.51074	0.0120478	0.0603435
CSTF3	17.0897	-0.958987	0.455075	2.10732	0.0350902	0.131648
AL360181.3	23.7711	-0.959945	0.380579	2.52233	0.011658	0.0589088
PA2G4P6	138.892	-0.960289	0.221888	4.32781	1.50602e-05	0.000246309
TMEM204	59.2759	-0.960807	0.27055	3.55131	0.000383322	0.00383058
ARL14EP	103.05	-0.962695	0.230767	4.17172	3.0231e-05	0.000446619
DERPC	13.4115	-0.964143	0.482274	1.99916	0.0455913	0.158505
COIL	58.923	-0.964173	0.267787	3.60052	0.000317576	0.00328087
EHMT2	36.0598	-0.968229	0.315646	3.06745	0.00215895	0.0160237
HDHD5	26.993	-0.969364	0.354542	2.73413	0.00625458	0.0369421
AC008124.1	26.3798	-0.969732	0.374245	2.59117	0.00956508	0.0512378
SCRN2	29.0124	-0.971269	0.349199	2.78142	0.00541211	0.0332346
GPX7	30.7152	-0.973176	0.337415	2.88421	0.003924	0.026127
ABRAXAS1	68.8573	-0.973532	0.311983	3.12046	0.00180567	0.0138504
AC005842.1	39.0505	-0.973849	0.318789	3.05484	0.0022518	0.0164659
PUS1	24.2919	-0.975024	0.377035	2.58603	0.00970879	0.0517149
CD84	149.598	-0.979161	0.212094	4.61663	3.90024e-06	7.52318e-05
RAD9A	17.3915	-0.980568	0.453398	2.16271	0.0305635	0.119317
TSN	51.7533	-0.981209	0.273659	3.58552	0.000336409	0.00343872
AC008555.4	78.6649	-0.984357	0.266388	3.69519	0.000219719	0.00239341
NSUN5	33.8873	-0.984774	0.323522	3.04391	0.00233522	0.0169267
PET117	18.8131	-0.98546	0.42074	2.34221	0.0191702	0.0860139
IREB2	38.7832	-0.986081	0.314591	3.13449	0.00172155	0.013274
LINC00861	119.893	-0.986545	0.360186	2.73899	0.00616286	0.0365118
TTC9	51.1386	-0.987301	0.325566	3.03257	0.00242481	0.0174238
MED16	53.0228	-0.98779	0.279811	3.5302	0.00041524	0.00408624
SPIN2B	12.4101	-0.98944	0.518369	1.90875	0.0562939	0.183826
MRPS23	54.6594	-0.991785	0.298611	3.32132	0.000895923	0.00766087
THEM6	11.9023	-0.993256	0.502108	1.97817	0.0479093	0.163721
WDR6	39.437	-0.996243	0.314011	3.17264	0.00151061	0.0119166
PUS3	24.7605	-0.999951	0.367922	2.71784	0.00657106	0.0384205
SCO1	41.4773	-1.00157	0.301545	3.32147	0.000895454	0.00766087
TMEM203	97.3767	-1.00212	0.232718	4.30614	1.66129e-05	0.000268676
GIMAP1	214.174	-1.00385	0.180925	5.54845	2.8821e-08	8.33792e-07
EPHB6	49.0673	-1.00638	0.31491	3.19577	0.00139458	0.0111321
AC011448.1	73.7698	-1.00651	0.273897	3.67478	0.00023805	0.00256899
SPOUT1	15.7922	-1.0111	0.461301	2.19184	0.028391	0.113135
AL645924.2	50.8941	-1.01328	0.358458	2.82676	0.0047021	0.0299018
NPLOC4	23.6971	-1.01377	0.389975	2.59957	0.00933405	0.0503189
COX11	53.3901	-1.01429	0.280708	3.61332	0.000302301	0.00313983
TESPA1	107.993	-1.01583	0.248859	4.08197	4.46565e-05	0.000620276
FBXO32	146.636	-1.01618	0.294187	3.45419	0.000551939	0.00518536
ISCA2	68.4291	-1.01649	0.272356	3.73221	0.00018981	0.00212339
TRIM59	24.0493	-1.01877	0.451096	2.25844	0.0239184	0.100777
BIN3	30.2652	-1.02228	0.359581	2.84297	0.00446948	0.0288974
ARMH1	97.0983	-1.02526	0.258991	3.95865	7.53742e-05	0.000961808
GPR155	112.735	-1.02642	0.223581	4.59083	4.41488e-06	8.43184e-05
TTN	36.5122	-1.02676	0.379144	2.70811	0.00676679	0.0392096
TRMT13	42.0748	-1.03047	0.305571	3.37228	0.000745484	0.00660806
MYC	140.007	-1.03106	0.284479	3.6244	0.00028963	0.00304863
RNF219	25.7892	-1.03678	0.406143	2.55275	0.0106877	0.0554042
NOSIP	676.209	-1.03747	0.256368	4.04682	5.19189e-05	0.000710946
NAIP	26.7557	-1.03771	0.401671	2.58348	0.0097808	0.0520031
HEIH	56.4513	-1.03793	0.278319	3.72926	0.000192043	0.00213601
SLFN5	245.065	-1.04236	0.216027	4.82513	1.39915e-06	2.96476e-05
HEMK1	32.6185	-1.04285	0.337898	3.0863	0.00202666	0.0152419
REPIN1	20.2194	-1.04326	0.426135	2.44818	0.0143581	0.0694113
ZCCHC3	24.5658	-1.04328	0.40291	2.58936	0.00961543	0.0513602
TEFM	26.8962	-1.04386	0.370183	2.81985	0.00480461	0.0303873
CIAPIN1	61.6094	-1.04433	0.310439	3.36404	0.000768117	0.00677764
DTX3L	29.7692	-1.04768	0.357571	2.92999	0.00338973	0.0230995
ABI2	21.4964	-1.04846	0.407023	2.57593	0.00999698	0.0526701
ZFP14	42.2091	-1.05315	0.308639	3.41224	0.000644303	0.00590035
ZNF107	35.7917	-1.05327	0.350359	3.00626	0.00264479	0.0187493
SLC2A11	20.8495	-1.05656	0.418272	2.52601	0.0115367	0.0586018
DSEL	35.5134	-1.05713	0.397142	2.66186	0.00777107	0.0435691
CHTF8	15.2481	-1.05809	0.468571	2.25813	0.0239378	0.100785
BSDC1	59.2999	-1.06054	0.280755	3.77745	0.000158441	0.0018216
SLC35E3	20.8182	-1.06092	0.409443	2.59113	0.00956627	0.0512378
FBXO3	28.2911	-1.06395	0.36738	2.89606	0.00377883	0.0253347
MT-ND6	267.003	-1.07045	0.237797	4.50153	6.74664e-06	0.000122409
COASY	28.6569	-1.07048	0.350715	3.0523	0.00227099	0.0165437
RRP7BP	22.347	-1.07056	0.39799	2.68993	0.00714676	0.0408809
FAM153A	13.7948	-1.07403	0.548107	1.95952	0.0500516	0.169347
OXA1L	80.6235	-1.07492	0.261997	4.10278	4.08211e-05	0.000573868
CEPT1	21.6597	-1.07778	0.417971	2.57861	0.00991994	0.0524069
ZNF101	81.7759	-1.07984	0.254775	4.2384	2.25114e-05	0.000346687
AL441992.2	16.9292	-1.08196	0.452117	2.3931	0.0167068	0.077849
LINC01215	30.7673	-1.08362	0.354878	3.0535	0.00226187	0.016498
POLM	30.3521	-1.08371	0.381505	2.84061	0.00450272	0.0290153
CLUAP1	55.2734	-1.08487	0.299929	3.61709	0.000297933	0.00312238
DCLRE1C	16.414	-1.08594	0.456048	2.3812	0.0172561	0.079832
AP002884.1	28.945	-1.08763	0.392424	2.77157	0.00557867	0.0340587
HIPK1-AS1	20.4337	-1.08833	0.422731	2.57451	0.0100381	0.052839
CHURC1-FNTB	17.736	-1.09011	0.427283	2.55125	0.0107337	0.0555933
NNT	32.3439	-1.09067	0.337012	3.23629	0.00121093	0.00993033
CYTH4	55.5854	-1.09606	0.300684	3.64523	0.000267149	0.00285647
TRAF3IP3	367.057	-1.09877	0.178511	6.15517	7.49958e-10	2.93555e-08
LUC7L3	359.637	-1.10273	0.195706	5.63463	1.75432e-08	5.41785e-07
EP400P1	21.3687	-1.1039	0.406506	2.71557	0.00661609	0.0385673
AL928654.3	148.27	-1.10457	0.229238	4.81846	1.44669e-06	3.05436e-05
PNISR	809.117	-1.10585	0.180794	6.11666	9.55579e-10	3.67423e-08
ANAPC7	20.2984	-1.10589	0.411087	2.69016	0.00714175	0.0408809
RBM43	49.8106	-1.10814	0.28411	3.90038	9.60409e-05	0.00116412
WDR73	42.0969	-1.10887	0.362892	3.05565	0.00224575	0.0164424
SLC35C2	56.9745	-1.11051	0.277697	3.99899	6.36121e-05	0.000828098
MCM3	29.7786	-1.11196	0.354609	3.13574	0.00171422	0.0132351
TCTA	23.3301	-1.11227	0.428743	2.59426	0.0094796	0.0508674
MHENCR	96.7014	-1.11416	0.285557	3.90171	9.55173e-05	0.00116078
TMEM209	25.0681	-1.11573	0.389472	2.86472	0.00417378	0.0272587
TMEM42	20.5887	-1.11662	0.418791	2.6663	0.00766913	0.0431881
ICA1L	33.013	-1.1169	0.48367	2.30923	0.0209311	0.0922082
TCEA3	51.1277	-1.11761	0.432305	2.58524	0.00973101	0.0517858
SLC40A1	37.7111	-1.11789	0.370985	3.01331	0.00258414	0.0183867
INTS1	23.6767	-1.11845	0.400251	2.79436	0.00520021	0.0322914
MORC2-AS1	20.9151	-1.11915	0.435788	2.56812	0.0102253	0.0536298
GALNT2	38.7782	-1.12371	0.372043	3.02038	0.00252456	0.0180068
ZNF75A	36.0437	-1.12739	0.323135	3.48892	0.00048497	0.00464643
GIMAP4	369.216	-1.1359	0.293483	3.87042	0.00010865	0.00130605
NELL2	75.5346	-1.13828	0.379134	3.00232	0.00267927	0.0189474
ZNF43	28.5137	-1.13867	0.395728	2.8774	0.00400961	0.0264543
MRPL20-AS1	25.1984	-1.14104	0.409217	2.78835	0.00529768	0.0328264
MAVS	29.9036	-1.14743	0.352666	3.25359	0.00113958	0.00947905
LENG8	106.926	-1.1496	0.278857	4.12256	3.74692e-05	0.000535828
SMYD4	22.608	-1.15166	0.408208	2.82125	0.00478364	0.0302877
DPEP2	30.007	-1.15373	0.35046	3.29205	0.000994617	0.008418
TMEM161B-AS1	45.7975	-1.15892	0.339816	3.41043	0.000648605	0.00592107
SLC35E2A	11.1442	-1.16386	0.544472	2.13759	0.0325499	0.125073
ERCC4	26.217	-1.1692	0.383436	3.04928	0.00229389	0.0166479
BOD1	51.1527	-1.1721	0.284582	4.11868	3.81052e-05	0.000542253
KLHDC3	37.9205	-1.18131	0.346843	3.40588	0.000659509	0.00600174
RPUSD3	24.2705	-1.18822	0.387941	3.06289	0.00219207	0.0161718
PDK1	50.1424	-1.18874	0.386848	3.07289	0.00211999	0.0158209
AC025159.1	27.6193	-1.18875	0.381131	3.11901	0.00181462	0.0138704
COG8	13.5742	-1.20177	0.489895	2.45312	0.0141625	0.0686372
AC020978.7	14.6753	-1.21182	0.527819	2.29589	0.0216821	0.0943675
AC010132.3	21.5629	-1.21283	0.40554	2.99066	0.00278371	0.0195432
AC034102.1	23.1117	-1.21947	0.408849	2.98268	0.00285739	0.0200121
AK3	48.4819	-1.2242	0.3275	3.73801	0.00018548	0.00208701
Z84492.1	35.7267	-1.22687	0.381856	3.21291	0.00131398	0.0106105
NME6	28.4369	-1.23306	0.451474	2.73118	0.0063108	0.0371985
YPEL2	78.9992	-1.23936	0.246851	5.02069	5.1486e-07	1.19571e-05
OXLD1	101.603	-1.2502	0.253093	4.9397	7.82409e-07	1.74049e-05
ZNF22	82.651	-1.25202	0.24486	5.11323	3.16693e-07	7.89151e-06
CHMP7	59.2891	-1.2521	0.271944	4.60426	4.13937e-06	7.93174e-05
LINC00662	25.8759	-1.25988	0.446479	2.8218	0.00477551	0.0302692
C11orf68	27.1446	-1.27084	0.366715	3.46546	0.000529317	0.00498898
SELL	416.299	-1.27102	0.536733	2.36808	0.0178808	0.0822631
ZNF766	36.5613	-1.27412	0.329649	3.86509	0.000111047	0.00132765
GVINP1	67.358	-1.28175	0.264421	4.84736	1.25114e-06	2.67063e-05
YIPF4	139.246	-1.28389	0.215147	5.96751	2.40895e-09	8.74147e-08
ZNF350	20.7487	-1.28488	0.485565	2.64617	0.00814096	0.045231
LDLRAP1	183.235	-1.29049	0.278452	4.63453	3.57753e-06	6.92371e-05
AC104532.2	28.9365	-1.29291	0.433707	2.98106	0.0028725	0.0200454
SCAND2P	21.9934	-1.29766	0.403409	3.21673	0.00129659	0.0104993
GIMAP6	58.684	-1.29831	0.29782	4.35937	1.30436e-05	0.000217618
AC025171.2	23.7006	-1.30023	0.467575	2.78079	0.00542262	0.0332346
GIMAP7	798.402	-1.3017	0.265753	4.89815	9.67449e-07	2.11166e-05
AC097448.1	26.3382	-1.31096	0.377736	3.47057	0.000519356	0.00490306
TECPR1	38.5728	-1.31547	0.348755	3.77188	0.000162019	0.00185906
MTMR4	22.7254	-1.32406	0.402644	3.28842	0.00100752	0.00851481
TSPAN32	33.8978	-1.32686	0.442755	2.99683	0.00272799	0.0191985
SCAMP1-AS1	19.4169	-1.32963	0.430898	3.08571	0.00203067	0.0152508
GNPAT	52.1054	-1.32986	0.368033	3.61341	0.000302193	0.00313983
TRDMT1	43.8556	-1.34203	0.3828	3.50582	0.000455211	0.00442617
MDS2	30.0381	-1.35568	0.388893	3.48601	0.00049029	0.00467426
CBLL1	42.7999	-1.35696	0.336543	4.03207	5.52878e-05	0.000748254
AC008554.1	21.8704	-1.36131	0.448137	3.0377	0.00238392	0.0171725
FBXL16	24.837	-1.36158	0.401392	3.39214	0.000693486	0.00625279
IL6R	60.606	-1.36919	0.276681	4.94862	7.47414e-07	1.67548e-05
DBP	58.4633	-1.38852	0.354182	3.92036	8.84152e-05	0.00110158
MINCR	24.9241	-1.40389	0.446388	3.145	0.00166085	0.0128915
AC046185.3	57.929	-1.40535	0.278976	5.03754	4.71544e-07	1.11349e-05
ZNF302	25.1436	-1.41637	0.440493	3.21542	0.00130255	0.0105329
MFSD8	24.2348	-1.42049	0.405324	3.50458	0.000457337	0.00442617
AC013489.1	15.4581	-1.4295	0.508522	2.81109	0.00493735	0.0310401
PDF	8.12852	-1.43907	0.654091	2.20011	0.0277993	0.11193
RPARP-AS1	18.2786	-1.44251	0.471322	3.06056	0.00220924	0.0162477
AC137932.3	28.3477	-1.45753	0.41078	3.54821	0.000387857	0.00386924
NHLRC3	40.7876	-1.46933	0.325543	4.51346	6.37772e-06	0.000116811
C2orf68	30.9141	-1.47063	0.372735	3.94551	7.963e-05	0.00100726
ING4	57.3735	-1.49057	0.291365	5.11581	3.12395e-07	7.81795e-06
MPI	23.0483	-1.49255	0.496661	3.00516	0.0026544	0.0187944
SLC25A45	61.5615	-1.50472	0.352798	4.26511	1.99806e-05	0.000314384
CEP68	39.5697	-1.50836	0.356629	4.22948	2.3423e-05	0.000357879
MRI1	31.9649	-1.52464	0.380734	4.00447	6.21562e-05	0.000815006
STMN3	123.462	-1.55891	0.313418	4.97391	6.56162e-07	1.48816e-05
ATF6B	46.3617	-1.55937	0.314754	4.95425	7.26105e-07	1.64038e-05
AL359220.1	24.9028	-1.56744	0.448511	3.49475	0.000474503	0.00456877
EPHX2	63.977	-1.57842	0.418888	3.76812	0.000164483	0.00188361
ADPRM	71.7933	-1.62104	0.28714	5.64548	1.64718e-08	5.16949e-07
FCGRT	67.336	-1.63665	0.398176	4.11036	3.95035e-05	0.000559409
DBT	23.6627	-1.66774	0.415827	4.01065	6.05511e-05	0.000804485
LINC01089	36.3501	-1.6769	0.384849	4.35729	1.31682e-05	0.000219068
ACTN1	67.5373	-1.68191	0.72806	2.31012	0.0208816	0.0921267
ZNF397	18.4146	-1.69989	0.476971	3.56394	0.000365331	0.00369531
NSUN5P1	48.737	-1.78068	0.363281	4.90164	9.50383e-07	2.08223e-05
TRIM56	87.4363	-1.81987	0.283481	6.41973	1.36513e-10	6.29042e-09
AK5	37.1515	-1.8881	0.880989	2.14316	0.0320999	0.123753
KLF7	27.2703	-1.8904	0.454435	4.1599	3.18386e-05	0.000464375
LINC00402	37.2009	-1.90448	0.403262	4.7227	2.32734e-06	4.6595e-05
AC138150.1	38.0143	-1.93162	0.380441	5.07733	3.82782e-07	9.29887e-06
TRIM73	6.37146	-2.07733	0.765363	2.71417	0.00664414	0.0386607
AC116533.1	89.0101	-2.10201	0.663792	3.16667	0.00154193	0.0121307
AL031846.2	24.0114	-2.11063	0.470644	4.48455	7.3067e-06	0.000131354
PAXIP1-AS1	42.3174	-2.13001	0.450972	4.72316	2.32202e-06	4.6595e-05
MAGEF1	31.6568	-2.17617	0.461099	4.71954	2.36383e-06	4.71629e-05
FAM153CP	32.8552	-2.25716	0.531318	4.24823	2.15466e-05	0.000335388
AC004057.1	92.6954	-2.27693	0.709596	3.20877	0.00133304	0.0107346
NSUN5P2	31.2008	-2.45233	0.430816	5.69228	1.25351e-08	4.0887e-07
LRRN3	25.4836	-3.51052	0.661057	5.31046	1.09349e-07	2.89901e-06

## Sheet: DESeq2_NK_periphery vs center
Spalte1	baseMean	log2FoldChange	lfcSE	stat	pvalue	padj
DNPH1	12.0509	-2.60509	0.708566	3.67657	0.000236389	0.0542796
STMN1	92.6755	-2.42818	0.333577	7.27922	3.35753e-13	1.27653e-09
PTTG1	24.6432	-2.24474	0.542163	4.14034	3.46789e-05	0.0201514
NDFIP2	11.4477	-2.2314	0.59295	3.76322	0.000167736	0.0542796
HIST1H2AM	11.4622	-2.2282	0.659292	3.37969	0.000725676	0.0985364
LTB	28.4036	-1.99454	0.402954	4.94978	7.42958e-07	0.000706182
CKS1B	17.6927	-1.87471	0.538787	3.4795	0.000502344	0.0795797
ZNF683	24.9593	-1.84805	0.500521	3.69227	0.000222265	0.0542796
MX1	21.6555	-1.8165	0.517939	3.50718	0.000452891	0.078045
CENPF	22.6174	-1.78881	0.519494	3.44337	0.00057451	0.0870337
LINC01871	74.7375	-1.54055	0.378217	4.0732	4.6372e-05	0.0201514
CTSA	22.0569	-1.38133	0.431312	3.20262	0.00136185	0.152287
FABP5	36.4988	-1.37088	0.392117	3.49609	0.000472129	0.078045
SMC4	27.1046	-1.33005	0.420309	3.16445	0.00155374	0.168781
PPP1R14B	34.2576	-1.32421	0.375255	3.52882	0.000417414	0.0755718
XCL2	394.402	-1.252	0.336699	3.71845	0.000200447	0.0542796
HMGB2	119.411	-1.2138	0.29848	4.06661	4.77018e-05	0.0201514
CKLF	100.387	-1.18741	0.307088	3.86669	0.000110322	0.0419445
TNFRSF18	97.8935	-1.15119	0.339653	3.3893	0.000700713	0.0985364
KLRC1	97.1316	-1.05959	0.31902	3.3214	0.000895685	0.117427
TMIGD2	75.4078	-1.04111	0.325057	3.20285	0.00136073	0.152287
GZMM	118.13	0.888862	0.286952	-3.0976	0.00195095	0.195197
GZMH	174.284	0.937831	0.285055	-3.29	0.00100187	0.12697
EFHD2	113.861	0.9673	0.298384	-3.24179	0.0011878	0.145679
FLNA	46.7399	1.0654	0.342768	-3.10822	0.0018822	0.193409
PLAC8	86.1402	1.07411	0.291183	-3.6888	0.000225317	0.0542796
DIP2A	43.6681	1.10212	0.353321	-3.11933	0.00181266	0.191437
KLRF1	119.219	1.10705	0.307588	-3.59912	0.000319295	0.060698
ITGB2	128.902	1.11281	0.259254	-4.29235	1.7679e-05	0.0134431
SPON2	152.793	1.26083	0.306521	-4.11335	3.8995e-05	0.0201514
GSAP	25.5271	1.46241	0.398495	-3.66984	0.000242702	0.0542796
FCGR3A	148.819	1.52502	0.305243	-4.99608	5.85083e-07	0.000706182
FGFBP2	186.88	1.58637	0.308189	-5.14741	2.64111e-07	0.000502076
TTC38	28.329	1.64023	0.449278	-3.65081	0.000261419	0.0552175
PXN	12.1431	1.85898	0.577864	-3.21699	0.00129543	0.152287
SSBP3	10.2917	2.09134	0.609044	-3.4338	0.00059518	0.0870337
CX3CR1	11.3681	2.41627	0.664529	-3.63607	0.000276831	0.0553953
ASCL2	9.96783	2.4288	0.64931	-3.74059	0.000183592	0.0542796
